# Supplementary material for: In silico detection of dysregulated genes and molecular pathways in Alzheimer’s disease as basis for food restoring approach
Source: PeerJ. 2025 Apr 7;13:e19100. doi: 10.7717/peerj.19100 (PMC11984471; doi:10.7717/peerj.19100)
Supplement: Supplemental Information 2 [file peerj-13-19100-s002.xlsx]

## Sheet: Sheet1
Input List annotation
microRNA name	miRBase accession	microRNA mature sequence
hsa-let-7a-5p	MIMAT0000062	UGAGGUAGUAGGUUGUAUAGUU
hsa-let-7d-3p	MIMAT0004484	CUAUACGACCUGCUGCCUUUCU
hsa-let-7e-5p	MIMAT0000066	UGAGGUAGGAGGUUGUAUAGUU
hsa-let-7f-5p	MIMAT0000067	UGAGGUAGUAGAUUGUAUAGUU
hsa-let-7g-5p	MIMAT0000414	UGAGGUAGUAGUUUGUACAGUU
hsa-miR-103a-3p	MIMAT0000101	AGCAGCAUUGUACAGGGCUAUGA
hsa-miR-106b-3p	MIMAT0004672	CCGCACUGUGGGUACUUGCUGC
hsa-miR-107	MIMAT0000104	AGCAGCAUUGUACAGGGCUAUCA
hsa-miR-10b-3p	MIMAT0004556	ACAGAUUCGAUUCUAGGGGAAU
hsa-miR-126-3p	MIMAT0000445	UCGUACCGUGAGUAAUAAUGCG
hsa-miR-127-3p	MIMAT0000446	UCGGAUCCGUCUGAGCUUGGCU
hsa-miR-1294	MIMAT0005884	UGUGAGGUUGGCAUUGUUGUCU
hsa-miR-132-3p	MIMAT0000426	UAACAGUCUACAGCCAUGGUCG
hsa-miR-133b	MIMAT0000770	UUUGGUCCCCUUCAACCAGCUA
hsa-miR-135b-3p	MIMAT0004698	AUGUAGGGCUAAAAGCCAUGGG
hsa-miR-137-3p	MIMAT0000429	UUAUUGCUUAAGAAUACGCGUAG
hsa-miR-142-3p	MIMAT0000434	UGUAGUGUUUCCUACUUUAUGGA
hsa-miR-142-5p	MIMAT0000433	CAUAAAGUAGAAAGCACUACU
hsa-miR-143-3p	MIMAT0000435	UGAGAUGAAGCACUGUAGCUC
hsa-miR-144-5p	MIMAT0004600	GGAUAUCAUCAUAUACUGUAAG
hsa-miR-146a-3p	MIMAT0004608	CCUCUGAAAUUCAGUUCUUCAG
hsa-miR-146b-3p	MIMAT0004766	GCCCUGUGGACUCAGUUCUGGU
hsa-miR-148a-3p	MIMAT0000243	UCAGUGCACUACAGAACUUUGU
hsa-miR-148b-5p	MIMAT0004699	AAGUUCUGUUAUACACUCAGGC
hsa-miR-154-3p	MIMAT0000453	AAUCAUACACGGUUGACCUAUU
hsa-miR-15a-3p	MIMAT0004488	CAGGCCAUAUUGUGCUGCCUCA
hsa-miR-15b-5p	MIMAT0000417	UAGCAGCACAUCAUGGUUUACA
hsa-miR-15b-5p	MIMAT0000417	UAGCAGCACAUCAUGGUUUACA
hsa-miR-17-3p	MIMAT0000071	ACUGCAGUGAAGGCACUUGUAG
hsa-miR-181a-2-3p	MIMAT0004558	ACCACUGACCGUUGACUGUACC
hsa-miR-181b-3p	MIMAT0022692	CUCACUGAACAAUGAAUGCAA
hsa-miR-181c-5p	MIMAT0000258	AACAUUCAACCUGUCGGUGAGU
hsa-miR-181d-3p	MIMAT0026608	CCACCGGGGGAUGAAUGUCAC
hsa-miR-191-5p	MIMAT0000440	CAACGGAAUCCCAAAAGCAGCUG
hsa-miR-193a-3p	MIMAT0000459	AACUGGCCUACAAAGUCCCAGU
hsa-miR-193b-3p	MIMAT0002819	AACUGGCCCUCAAAGUCCCGCU
hsa-miR-194-3p	MIMAT0004671	CCAGUGGGGCUGCUGUUAUCUG
hsa-miR-195-3p	MIMAT0004615	CCAAUAUUGGCUGUGCUGCUCC
hsa-miR-199a-5p	MIMAT0000231	CCCAGUGUUCAGACUACCUGUUC
hsa-miR-200a-3p	MIMAT0000682	UAACACUGUCUGGUAACGAUGU
hsa-miR-212-3p	MIMAT0000269	UAACAGUCUCCAGUCACGGCC
hsa-miR-214-3p	MIMAT0000271	ACAGCAGGCACAGACAGGCAGU
hsa-miR-219b-5p	MIMAT0019747	AGAUGUCCAGCCACAAUUCUCG
hsa-miR-221-3p	MIMAT0000278	AGCUACAUUGUCUGCUGGGUUUC
hsa-miR-22-3p	MIMAT0000077	AAGCUGCCAGUUGAAGAACUGU
hsa-miR-23a-3p	MIMAT0000078	AUCACAUUGCCAGGGAUUUCC
hsa-miR-23b-3p	MIMAT0000418	AUCACAUUGCCAGGGAUUACCAC
hsa-miR-26a-5p	MIMAT0000082	UUCAAGUAAUCCAGGAUAGGCU
hsa-miR-26b-5p	MIMAT0000083	UUCAAGUAAUUCAGGAUAGGU
hsa-miR-27a-3p	MIMAT0000084	UUCACAGUGGCUAAGUUCCGC
hsa-miR-29b-2-5p	MIMAT0004515	CUGGUUUCACAUGGUGGCUUAG
hsa-miR-29b-3p	MIMAT0000100	UAGCACCAUUUGAAAUCAGUGUU
hsa-miR-301a-3p	MIMAT0000688	CAGUGCAAUAGUAUUGUCAAAGC
hsa-miR-31-3p	MIMAT0004504	UGCUAUGCCAACAUAUUGCCAU
hsa-miR-3200-3p	MIMAT0015085	CACCUUGCGCUACUCAGGUCUG
hsa-miR-335-3p	MIMAT0004703	UUUUUCAUUAUUGCUCCUGACC
hsa-miR-338-3p	MIMAT0000763	UCCAGCAUCAGUGAUUUUGUUG
hsa-miR-342-3p	MIMAT0000753	UCUCACACAGAAAUCGCACCCGU
hsa-miR-34a-3p	MIMAT0004557	CAAUCAGCAAGUAUACUGCCCU
hsa-miR-361-3p	MIMAT0004682	UCCCCCAGGUGUGAUUCUGAUUU
hsa-miR-375-3p	MIMAT0000728	UUUGUUCGUUCGGCUCGCGUGA
hsa-miR-433-3p	MIMAT0001627	AUCAUGAUGGGCUCCUCGGUGU
hsa-miR-4449	MIMAT0018968	CGUCCCGGGGCUGCGCGAGGCA
hsa-miR-455-3p	MIMAT0004784	GCAGUCCAUGGGCAUAUACAC
hsa-miR-4674	MIMAT0019756	CUGGGCUCGGGACGCGCGGCU
hsa-miR-483-3p	MIMAT0002173	UCACUCCUCUCCUCCCGUCUU
hsa-miR-497-3p	MIMAT0004768	CAAACCACACUGUGGUGUUAGA
hsa-miR-502-3p	MIMAT0004775	AAUGCACCUGGGCAAGGAUUCA
hsa-miR-532-5p	MIMAT0002888	CAUGCCUUGAGUGUAGGACCGU
hsa-miR-545-3p	MIMAT0003165	UCAGCAAACAUUUAUUGUGUGC
hsa-miR-590-3p	MIMAT0004801	UAAUUUUAUGUAUAAGCUAGU
hsa-miR-660-5p	MIMAT0003338	UACCCAUUGCAUAUCGGAGUUG
hsa-miR-708-3p	MIMAT0004927	CAACUAGACUGUGAGCUUCUAG
hsa-miR-885-5p	MIMAT0004947	UCCAUUACACUACCCUGCCUCU
hsa-miR-93-3p	MIMAT0004509	ACUGCUGAGCUAGCACUUCCCG
hsa-miR-9-3p	MIMAT0000442	AUAAAGCUAGAUAACCGAAAGU
hsa-miR-98-5p	MIMAT0000096	UGAGGUAGUAAGUUGUAUUGUU
