# Supplementary material for: In silico detection of dysregulated genes and molecular pathways in Alzheimer’s disease as basis for food restoring approach
Source: PeerJ. 2025 Apr 7;13:e19100. doi: 10.7717/peerj.19100 (PMC11984471; doi:10.7717/peerj.19100)
Supplement: Supplemental Information 3 [file peerj-13-19100-s003.xlsx]

## Sheet: Sheet1
Input List annotation
microRNA name	miRBase accession	microRNA mature sequence
hsa-let-7b-3p	MIMAT0004482	CUAUACAACCUACUGCCUUCCC
hsa-let-7b-5p	MIMAT0000063	UGAGGUAGUAGGUUGUGUGGUU
hsa-let-7d-3p	MIMAT0004484	CUAUACGACCUGCUGCCUUUCU
hsa-let-7e-3p	MIMAT0004485	CUAUACGGCCUCCUAGCUUUCC
hsa-let-7e-5p	MIMAT0000066	UGAGGUAGGAGGUUGUAUAGUU
hsa-let-7f-1-3p	MIMAT0004486	CUAUACAAUCUAUUGCCUUCCC
hsa-let-7f-2-3p	MIMAT0004487	CUAUACAGUCUACUGUCUUUCC
hsa-let-7f-5p	MIMAT0000067	UGAGGUAGUAGAUUGUAUAGUU
hsa-miR-100-3p	MIMAT0004512	CAAGCUUGUAUCUAUAGGUAUG
hsa-miR-100-5p	MIMAT0000098	AACCCGUAGAUCCGAACUUGUG
hsa-miR-105-3p	MIMAT0004516	ACGGAUGUUUGAGCAUGUGCUA
hsa-miR-105-5p	MIMAT0000102	UCAAAUGCUCAGACUCCUGUGGU
hsa-miR-106b-3p	MIMAT0004672	CCGCACUGUGGGUACUUGCUGC
hsa-miR-124-3p	MIMAT0000422	UAAGGCACGCGGUGAAUGCCAA
hsa-miR-124-5p	MIMAT0004591	CGUGUUCACAGCGGACCUUGAU
hsa-miR-125a-3p	MIMAT0004602	ACAGGUGAGGUUCUUGGGAGCC
hsa-miR-125a-5p	MIMAT0000443	UCCCUGAGACCCUUUAACCUGUGA
hsa-miR-125b-1-3p	MIMAT0004592	ACGGGUUAGGCUCUUGGGAGCU
hsa-miR-125b-2-3p	MIMAT0004603	UCACAAGUCAGGCUCUUGGGAC
hsa-miR-125b-5p	MIMAT0000423	UCCCUGAGACCCUAACUUGUGA
hsa-miR-128-1-5p	MIMAT0026477	CGGGGCCGUAGCACUGUCUGAGA
hsa-miR-128-1-5p	MIMAT0026477	CGGGGCCGUAGCACUGUCUGAGA
hsa-miR-128-2-5p	MIMAT0031095	GGGGGCCGAUACACUGUACGAGA
hsa-miR-128-3p	MIMAT0000424	UCACAGUGAACCGGUCUCUUU
hsa-miR-128-3p	MIMAT0000424	UCACAGUGAACCGGUCUCUUU
hsa-miR-1285-5p	MIMAT0022719	GAUCUCACUUUGUUGCCCAGG
hsa-miR-135a-2-3p	MIMAT0037309	AUGUAGGGAUGGAAGCCAUGAA
hsa-miR-135a-3p	MIMAT0004595	UAUAGGGAUUGGAGCCGUGGCG
hsa-miR-135a-5p	MIMAT0000428	UAUGGCUUUUUAUUCCUAUGUGA
hsa-miR-138-1-3p	MIMAT0004607	GCUACUUCACAACACCAGGGCC
hsa-miR-138-5p	MIMAT0000430	AGCUGGUGUUGUGAAUCAGGCCG
hsa-miR-140-5p	MIMAT0000431	CAGUGGUUUUACCCUAUGGUAG
hsa-miR-141-3p	MIMAT0000432	UAACACUGUCUGGUAAAGAUGG
hsa-miR-141-5p	MIMAT0004598	CAUCUUCCAGUACAGUGUUGGA
hsa-miR-142-3p	MIMAT0000434	UGUAGUGUUUCCUACUUUAUGGA
hsa-miR-142-5p	MIMAT0000433	CAUAAAGUAGAAAGCACUACU
hsa-miR-1468-3p	MIMAT0026638	AGCAAAAUAAGCAAAUGGAAAA
hsa-miR-1468-5p	MIMAT0006789	CUCCGUUUGCCUGUUUCGCUG
hsa-miR-146a-3p	MIMAT0004608	CCUCUGAAAUUCAGUUCUUCAG
hsa-miR-146a-5p	MIMAT0000449	UGAGAACUGAAUUCCAUGGGUU
hsa-miR-148b-5p	MIMAT0004699	AAGUUCUGUUAUACACUCAGGC
hsa-miR-151a-3p	MIMAT0000757	CUAGACUGAAGCUCCUUGAGG
hsa-miR-151a-5p	MIMAT0004697	UCGAGGAGCUCACAGUCUAGU
hsa-miR-151b	MIMAT0010214	UCGAGGAGCUCACAGUCU
hsa-miR-155-3p	MIMAT0004658	CUCCUACAUAUUAGCAUUAACA
hsa-miR-155-5p	MIMAT0000646	UUAAUGCUAAUCGUGAUAGGGGUU
hsa-miR-186-3p	MIMAT0004612	GCCCAAAGGUGAAUUUUUUGGG
hsa-miR-186-5p	MIMAT0000456	CAAAGAAUUCUCCUUUUGGGCU
hsa-miR-186-5p	MIMAT0000456	CAAAGAAUUCUCCUUUUGGGCU
hsa-miR-1908-5p	MIMAT0007881	CGGCGGGGACGGCGAUUGGUC
hsa-miR-197-3p	MIMAT0000227	UUCACCACCUUCUCCACCCAGC
hsa-miR-197-5p	MIMAT0022691	CGGGUAGAGAGGGCAGUGGGAGG
hsa-miR-200a-3p	MIMAT0000682	UAACACUGUCUGGUAACGAUGU
hsa-miR-200a-5p	MIMAT0001620	CAUCUUACCGGACAGUGCUGGA
hsa-miR-204-3p	MIMAT0022693	GCUGGGAAGGCAAAGGGACGU
hsa-miR-204-5p	MIMAT0000265	UUCCCUUUGUCAUCCUAUGCCU
hsa-miR-205-3p	MIMAT0009197	GAUUUCAGUGGAGUGAAGUUC
hsa-miR-205-5p	MIMAT0000266	UCCUUCAUUCCACCGGAGUCUG
hsa-miR-21-3p	MIMAT0004494	CAACACCAGUCGAUGGGCUGU
hsa-miR-21-5p	MIMAT0000076	UAGCUUAUCAGACUGAUGUUGA
hsa-miR-216a-3p	MIMAT0022844	UCACAGUGGUCUCUGGGAUUAU
hsa-miR-216a-5p	MIMAT0000273	UAAUCUCAGCUGGCAACUGUGA
hsa-miR-216b-3p	MIMAT0026721	ACACACUUACCCGUAGAGAUUCUA
hsa-miR-216b-5p	MIMAT0004959	AAAUCUCUGCAGGCAAAUGUGA
hsa-miR-26a-5p	MIMAT0000082	UUCAAGUAAUCCAGGAUAGGCU
hsa-miR-26b-3p	MIMAT0004500	CCUGUUCUCCAUUACUUGGCU
hsa-miR-27b-3p	MIMAT0000419	UUCACAGUGGCUAAGUUCUGC
hsa-miR-27b-5p	MIMAT0004588	AGAGCUUAGCUGAUUGGUGAAC
hsa-miR-28-3p	MIMAT0004502	CACUAGAUUGUGAGCUCCUGGA
hsa-miR-296-3p	MIMAT0004679	GAGGGUUGGGUGGAGGCUCUCC
hsa-miR-296-5p	MIMAT0000690	AGGGCCCCCCCUCAAUCCUGU
hsa-miR-29a-3p	MIMAT0000086	UAGCACCAUCUGAAAUCGGUUA
hsa-miR-29a-5p	MIMAT0004503	ACUGAUUUCUUUUGGUGUUCAG
hsa-miR-29b-1-5p	MIMAT0004514	GCUGGUUUCAUAUGGUGGUUUAGA
hsa-miR-29b-2-5p	MIMAT0004515	CUGGUUUCACAUGGUGGCUUAG
hsa-miR-29b-3p	MIMAT0000100	UAGCACCAUUUGAAAUCAGUGUU
hsa-miR-302b-3p	MIMAT0000715	UAAGUGCUUCCAUGUUUUAGUAG
hsa-miR-302b-5p	MIMAT0000714	ACUUUAACAUGGAAGUGCUUUC
hsa-miR-30b-3p	MIMAT0004589	CUGGGAGGUGGAUGUUUACUUC
hsa-miR-30b-5p	MIMAT0000420	UGUAAACAUCCUACACUCAGCU
hsa-miR-30c-5p	MIMAT0000244	UGUAAACAUCCUACACUCUCAGC
hsa-miR-30d-3p	MIMAT0004551	CUUUCAGUCAGAUGUUUGCUGC
hsa-miR-30d-5p	MIMAT0000245	UGUAAACAUCCCCGACUGGAAG
hsa-miR-345-3p	MIMAT0022698	GCCCUGAACGAGGGGUCUGGAG
hsa-miR-345-5p	MIMAT0000772	GCUGACUCCUAGUCCAGGGCUC
hsa-miR-34a-3p	MIMAT0004557	CAAUCAGCAAGUAUACUGCCCU
hsa-miR-34a-5p	MIMAT0000255	UGGCAGUGUCUUAGCUGGUUGU
hsa-miR-34c-3p	MIMAT0004677	AAUCACUAACCACACGGCCAGG
hsa-miR-34c-5p	MIMAT0000686	AGGCAGUGUAGUUAGCUGAUUGC
hsa-miR-3622b-3p	MIMAT0018006	UCACCUGAGCUCCCGUGCCUG
hsa-miR-362-3p	MIMAT0004683	AACACACCUAUUCAAGGAUUCA
hsa-miR-362-5p	MIMAT0000705	AAUCCUUGGAACCUAGGUGUGAGU
hsa-miR-371a-3p	MIMAT0000723	AAGUGCCGCCAUCUUUUGAGUGU
hsa-miR-371a-5p	MIMAT0004687	ACUCAAACUGUGGGGGCACU
hsa-miR-374a-3p	MIMAT0004688	CUUAUCAGAUUGUAUUGUAAUU
hsa-miR-374a-5p	MIMAT0000727	UUAUAAUACAACCUGAUAAGUG
hsa-miR-380-3p	MIMAT0000735	UAUGUAAUAUGGUCCACAUCUU
hsa-miR-381-3p	MIMAT0000736	UAUACAAGGGCAAGCUCUCUGU
hsa-miR-381-5p	MIMAT0022862	AGCGAGGUUGCCCUUUGUAUAU
hsa-miR-384	MIMAT0001075	AUUCCUAGAAAUUGUUCAUA
hsa-miR-422a	MIMAT0001339	ACUGGACUUAGGGUCAGAAGGC
hsa-miR-423-3p	MIMAT0001340	AGCUCGGUCUGAGGCCCCUCAGU
hsa-miR-423-5p	MIMAT0004748	UGAGGGGCAGAGAGCGAGACUUU
hsa-miR-424-3p	MIMAT0004749	CAAAACGUGAGGCGCUGCUAU
hsa-miR-424-5p	MIMAT0001341	CAGCAGCAAUUCAUGUUUUGAA
hsa-miR-425-5p	MIMAT0003393	AAUGACACGAUCACUCCCGUUGA
hsa-miR-429	MIMAT0001536	UAAUACUGUCUGGUAAAACCGU
hsa-miR-4467	MIMAT0018994	UGGCGGCGGUAGUUAUGGGCUU
hsa-miR-448	MIMAT0001532	UUGCAUAUGUAGGAUGUCCCAU
hsa-miR-449a	MIMAT0001541	UGGCAGUGUAUUGUUAGCUGGU
hsa-miR-449b-3p	MIMAT0009203	CAGCCACAACUACCCUGCCACU
hsa-miR-449b-5p	MIMAT0003327	AGGCAGUGUAUUGUUAGCUGGC
hsa-miR-449c-3p	MIMAT0013771	UUGCUAGUUGCACUCCUCUCUGU
hsa-miR-449c-5p	MIMAT0010251	UAGGCAGUGUAUUGCUAGCGGCUGU
hsa-miR-451a	MIMAT0001631	AAACCGUUACCAUUACUGAGUU
hsa-miR-451b	MIMAT0019840	UAGCAAGAGAACCAUUACCAUU
hsa-miR-455-3p	MIMAT0004784	GCAGUCCAUGGGCAUAUACAC
hsa-miR-455-5p	MIMAT0003150	UAUGUGCCUUUGGACUACAUCG
hsa-miR-4781-3p	MIMAT0019943	AAUGUUGGAAUCCUCGCUAGAG
hsa-miR-494-3p	MIMAT0002816	UGAAACAUACACGGGAAACCUC
hsa-miR-494-5p	MIMAT0026607	AGGUUGUCCGUGUUGUCUUCUCU
hsa-miR-5001-3p	MIMAT0021022	UUCUGCCUCUGUCCAGGUCCUU
hsa-miR-5010-3p	MIMAT0021044	UUUUGUGUCUCCCAUUCCCCAG
hsa-miR-501-3p	MIMAT0004774	AAUGCACCCGGGCAAGGAUUCU
hsa-miR-501-5p	MIMAT0002872	AAUCCUUUGUCCCUGGGUGAGA
hsa-miR-505-3p	MIMAT0002876	CGUCAACACUUGCUGGUUUCCU
hsa-miR-505-5p	MIMAT0004776	GGGAGCCAGGAAGUAUUGAUGU
hsa-miR-517-5p	MIMAT0002851	CCUCUAGAUGGAAGCACUGUCU
hsa-miR-517a-3p	MIMAT0002852	AUCGUGCAUCCCUUUAGAGUGU
hsa-miR-517b-3p	MIMAT0002857	AUCGUGCAUCCCUUUAGAGUGU
hsa-miR-518b	MIMAT0002844	CAAAGCGCUCCCCUUUAGAGGU
hsa-miR-518f-3p	MIMAT0002842	GAAAGCGCUUCUCUUUAGAGG
hsa-miR-518f-5p	MIMAT0002841	CUCUAGAGGGAAGCACUUUCUC
hsa-miR-520a-3p	MIMAT0002834	AAAGUGCUUCCCUUUGGACUGU
hsa-miR-520a-5p	MIMAT0002833	CUCCAGAGGGAAGUACUUUCU
hsa-miR-526a-3p	MIMAT0037326	GAAAGCGCUUCCUUUUAGAGGA
hsa-miR-526a-5p	MIMAT0002845	CUCUAGAGGGAAGCACUUUCUG
hsa-miR-550a-5p	MIMAT0004800	AGUGCCUGAGGGAGUAAGAGCCC
hsa-miR-603	MIMAT0003271	CACACACUGCAAUUACUUUUGC
hsa-miR-6513-3p	MIMAT0025483	UCAAGUGUCAUCUGUCCCUAG
hsa-miR-7-1-3p	MIMAT0004553	CAACAAAUCACAGUCUGCCAUA
hsa-miR-7-2-3p	MIMAT0004554	CAACAAAUCCCAGUCUACCUAA
hsa-miR-7-5p	MIMAT0000252	UGGAAGACUAGUGAUUUUGUUGUU
hsa-miR-766-3p	MIMAT0003888	ACUCCAGCCCCACAGCCUCAGC
hsa-miR-766-5p	MIMAT0022714	AGGAGGAAUUGGUGCUGGUCUU
hsa-miR-92a-1-5p	MIMAT0004507	AGGUUGGGAUCGGUUGCAAUGCU
hsa-miR-92a-2-5p	MIMAT0004508	GGGUGGGGAUUUGUUGCAUUAC
hsa-miR-92a-3p	MIMAT0000092	UAUUGCACUUGUCCCGGCCUGU
hsa-miR-92b-3p	MIMAT0003218	UAUUGCACUCGUCCCGGCCUCC
hsa-miR-92b-5p	MIMAT0004792	AGGGACGGGACGCGGUGCAGUG
hsa-miR-9-3p	MIMAT0000442	AUAAAGCUAGAUAACCGAAAGU
hsa-miR-9-5p	MIMAT0000441	UCUUUGGUUAUCUAGCUGUAUGA
