# Supplementary material for: In silico detection of dysregulated genes and molecular pathways in Alzheimer’s disease as basis for food restoring approach
Source: PeerJ. 2025 Apr 7;13:e19100. doi: 10.7717/peerj.19100 (PMC11984471; doi:10.7717/peerj.19100)
Supplement: Supplemental Information 6 — Target genes for each miRs down-regulated from the input list. [file peerj-13-19100-s006.xlsx]

## Sheet: Sheet1
Mienturnet Enrichment results TargetScan
Gene Symbol	p-value	FDR	Odd ratio	Number of interactions	microRNA 1	microRNA 2	microRNA 3	microRNA 4	microRNA 5	microRNA 6	microRNA 7	microRNA 8	microRNA 9	microRNA 10	microRNA 11	microRNA 12	microRNA 13	microRNA 14	microRNA 15	microRNA 16	microRNA 17
FRAT2	1.96779e-05	0.0725916	0.122727	5	hsa-miR-221-3p	hsa-miR-22-3p	hsa-miR-23a-3p/hsa-miR-23b-3p	hsa-miR-26a-5p/hsa-miR-26b-5p	hsa-miR-29b-3p
TIGD5	1.96779e-05	0.0725916	0.122727	5	hsa-miR-103a-3p/hsa-miR-107	hsa-miR-143-3p	hsa-miR-148a-3p	hsa-miR-199a-5p	hsa-miR-29b-3p
ZBTB37	2.8865e-05	0.0725916	0.290083	11	hsa-let-7a-5p/hsa-let-7e-5p/hsa-let-7f-5p/hsa-let-7g-5p/hsa-miR-98-5p	hsa-miR-103a-3p/hsa-miR-107	hsa-miR-142-5p	hsa-miR-15b-5p/hsa-miR-15b-5p	hsa-miR-199a-5p	hsa-miR-221-3p	hsa-miR-23a-3p/hsa-miR-23b-3p	hsa-miR-26a-5p/hsa-miR-26b-5p	hsa-miR-27a-3p	hsa-miR-29b-3p	hsa-miR-301a-3p
MTMR10	4.72848e-05	0.0725916	0.163636	6	hsa-miR-132-3p/hsa-miR-212-3p	hsa-miR-148a-3p	hsa-miR-154-3p	hsa-miR-181c-5p	hsa-miR-23a-3p/hsa-miR-23b-3p	hsa-miR-301a-3p
SMS	4.72848e-05	0.0725916	0.163636	6	hsa-miR-103a-3p/hsa-miR-107	hsa-miR-148a-3p	hsa-miR-15b-5p/hsa-miR-15b-5p	hsa-miR-23a-3p/hsa-miR-23b-3p	hsa-miR-26a-5p/hsa-miR-26b-5p	hsa-miR-29b-3p
PDIK1L	9.28602e-05	0.0906272	0.294545	10	hsa-miR-103a-3p/hsa-miR-107	hsa-miR-133b	hsa-miR-15b-5p/hsa-miR-15b-5p	hsa-miR-181c-5p	hsa-miR-221-3p	hsa-miR-22-3p	hsa-miR-26a-5p/hsa-miR-26b-5p	hsa-miR-29b-3p	hsa-miR-301a-3p	hsa-miR-338-3p
PRR14L	9.8807e-05	0.0906272	0.347727	12	hsa-let-7a-5p/hsa-let-7e-5p/hsa-let-7f-5p/hsa-let-7g-5p/hsa-miR-98-5p	hsa-miR-103a-3p/hsa-miR-107	hsa-miR-132-3p/hsa-miR-212-3p	hsa-miR-193a-3p/hsa-miR-193b-3p	hsa-miR-199a-5p	hsa-miR-221-3p	hsa-miR-22-3p	hsa-miR-23a-3p/hsa-miR-23b-3p	hsa-miR-27a-3p	hsa-miR-29b-3p	hsa-miR-301a-3p	hsa-miR-433-3p
ICOS	0.000108	0.0906272	0.147273	5	hsa-let-7a-5p/hsa-let-7e-5p/hsa-let-7f-5p/hsa-let-7g-5p/hsa-miR-98-5p	hsa-miR-26a-5p/hsa-miR-26b-5p	hsa-miR-27a-3p	hsa-miR-29b-3p	hsa-miR-338-3p
DCUN1D4	0.000114165	0.0906272	0.272727	9	hsa-miR-103a-3p/hsa-miR-107	hsa-miR-132-3p/hsa-miR-212-3p	hsa-miR-133b	hsa-miR-148a-3p	hsa-miR-15b-5p/hsa-miR-15b-5p	hsa-miR-221-3p	hsa-miR-27a-3p	hsa-miR-29b-3p	hsa-miR-301a-3p
SEC31B	0.000121977	0.0906272	0.245455	8	hsa-let-7a-5p/hsa-let-7e-5p/hsa-let-7f-5p/hsa-let-7g-5p/hsa-miR-98-5p	hsa-miR-15b-5p/hsa-miR-15b-5p	hsa-miR-193a-3p/hsa-miR-193b-3p	hsa-miR-23a-3p/hsa-miR-23b-3p	hsa-miR-27a-3p	hsa-miR-301a-3p	hsa-miR-338-3p	hsa-miR-342-3p
ATP11C	0.000129872	0.0906272	0.184091	6	hsa-miR-143-3p	hsa-miR-154-3p	hsa-miR-181c-5p	hsa-miR-23a-3p/hsa-miR-23b-3p	hsa-miR-26a-5p/hsa-miR-26b-5p	hsa-miR-27a-3p
PPP2R5E	0.000142776	0.0913293	0.306818	10	hsa-miR-132-3p/hsa-miR-212-3p	hsa-miR-133b	hsa-miR-148a-3p	hsa-miR-181c-5p	hsa-miR-200a-3p	hsa-miR-221-3p	hsa-miR-23a-3p/hsa-miR-23b-3p	hsa-miR-301a-3p	hsa-miR-342-3p	hsa-miR-502-3p
ADAMTS18	0.000201986	0.093192	0.227922	7	hsa-miR-148a-3p	hsa-miR-15b-5p/hsa-miR-15b-5p	hsa-miR-181c-5p	hsa-miR-26a-5p/hsa-miR-26b-5p	hsa-miR-29b-3p	hsa-miR-301a-3p	hsa-miR-338-3p
PDK4	0.000201986	0.093192	0.227922	7	hsa-miR-103a-3p/hsa-miR-107	hsa-miR-148a-3p	hsa-miR-15b-5p/hsa-miR-15b-5p	hsa-miR-181c-5p	hsa-miR-23a-3p/hsa-miR-23b-3p	hsa-miR-27a-3p	hsa-miR-29b-3p
POM121C	0.000201986	0.093192	0.227922	7	hsa-miR-132-3p/hsa-miR-212-3p	hsa-miR-15b-5p/hsa-miR-15b-5p	hsa-miR-181c-5p	hsa-miR-22-3p	hsa-miR-23a-3p/hsa-miR-23b-3p	hsa-miR-26a-5p/hsa-miR-26b-5p	hsa-miR-27a-3p
STAG1	0.000201986	0.093192	0.227922	7	hsa-miR-103a-3p/hsa-miR-107	hsa-miR-142-5p	hsa-miR-15b-5p/hsa-miR-15b-5p	hsa-miR-199a-5p	hsa-miR-200a-3p	hsa-miR-27a-3p	hsa-miR-433-3p
AMMECR1	0.000213971	0.093192	0.319091	10	hsa-miR-103a-3p/hsa-miR-107	hsa-miR-142-5p	hsa-miR-143-3p	hsa-miR-148a-3p	hsa-miR-15b-5p/hsa-miR-15b-5p	hsa-miR-191-5p	hsa-miR-221-3p	hsa-miR-23a-3p/hsa-miR-23b-3p	hsa-miR-26a-5p/hsa-miR-26b-5p	hsa-miR-29b-3p
CNNM2	0.000218532	0.093192	0.396503	13	hsa-let-7a-5p/hsa-let-7e-5p/hsa-let-7f-5p/hsa-let-7g-5p/hsa-miR-98-5p	hsa-miR-103a-3p/hsa-miR-107	hsa-miR-133b	hsa-miR-142-5p	hsa-miR-143-3p	hsa-miR-148a-3p	hsa-miR-15b-5p/hsa-miR-15b-5p	hsa-miR-181c-5p	hsa-miR-193a-3p/hsa-miR-193b-3p	hsa-miR-23a-3p/hsa-miR-23b-3p	hsa-miR-27a-3p	hsa-miR-29b-3p	hsa-miR-342-3p
SOX5	0.000265761	0.0947351	0.378409	12	hsa-miR-132-3p/hsa-miR-212-3p	hsa-miR-142-5p	hsa-miR-143-3p	hsa-miR-148a-3p	hsa-miR-15b-5p/hsa-miR-15b-5p	hsa-miR-181c-5p	hsa-miR-193a-3p/hsa-miR-193b-3p	hsa-miR-200a-3p	hsa-miR-23a-3p/hsa-miR-23b-3p	hsa-miR-26a-5p/hsa-miR-26b-5p	hsa-miR-301a-3p	hsa-miR-338-3p
ZBTB16	0.000265761	0.0947351	0.378409	12	hsa-let-7a-5p/hsa-let-7e-5p/hsa-let-7f-5p/hsa-let-7g-5p/hsa-miR-98-5p	hsa-miR-103a-3p/hsa-miR-107	hsa-miR-133b	hsa-miR-143-3p	hsa-miR-148a-3p	hsa-miR-15b-5p/hsa-miR-15b-5p	hsa-miR-200a-3p	hsa-miR-22-3p	hsa-miR-23a-3p/hsa-miR-23b-3p	hsa-miR-26a-5p/hsa-miR-26b-5p	hsa-miR-301a-3p	hsa-miR-338-3p
DLG2	0.000286272	0.0947351	0.3	9	hsa-miR-133b	hsa-miR-142-5p	hsa-miR-148a-3p	hsa-miR-181c-5p	hsa-miR-221-3p	hsa-miR-23a-3p/hsa-miR-23b-3p	hsa-miR-29b-3p	hsa-miR-301a-3p	hsa-miR-338-3p
JARID2	0.000286272	0.0947351	0.3	9	hsa-miR-142-5p	hsa-miR-148a-3p	hsa-miR-15b-5p/hsa-miR-15b-5p	hsa-miR-181c-5p	hsa-miR-22-3p	hsa-miR-23a-3p/hsa-miR-23b-3p	hsa-miR-26a-5p/hsa-miR-26b-5p	hsa-miR-29b-3p	hsa-miR-301a-3p
RUNX1T1	0.000297646	0.0947351	0.475568	16	hsa-let-7a-5p/hsa-let-7e-5p/hsa-let-7f-5p/hsa-let-7g-5p/hsa-miR-98-5p	hsa-miR-103a-3p/hsa-miR-107	hsa-miR-132-3p/hsa-miR-212-3p	hsa-miR-133b	hsa-miR-142-5p	hsa-miR-148a-3p	hsa-miR-154-3p	hsa-miR-15b-5p/hsa-miR-15b-5p	hsa-miR-193a-3p/hsa-miR-193b-3p	hsa-miR-199a-5p	hsa-miR-221-3p	hsa-miR-23a-3p/hsa-miR-23b-3p	hsa-miR-27a-3p	hsa-miR-29b-3p	hsa-miR-301a-3p	hsa-miR-502-3p
CDK8	0.000301684	0.0947351	0.357025	11	hsa-let-7a-5p/hsa-let-7e-5p/hsa-let-7f-5p/hsa-let-7g-5p/hsa-miR-98-5p	hsa-miR-103a-3p/hsa-miR-107	hsa-miR-133b	hsa-miR-148a-3p	hsa-miR-15b-5p/hsa-miR-15b-5p	hsa-miR-181c-5p	hsa-miR-200a-3p	hsa-miR-221-3p	hsa-miR-26a-5p/hsa-miR-26b-5p	hsa-miR-27a-3p	hsa-miR-433-3p
EXOC5	0.000313315	0.0947351	0.331364	10	hsa-let-7a-5p/hsa-let-7e-5p/hsa-let-7f-5p/hsa-let-7g-5p/hsa-miR-98-5p	hsa-miR-103a-3p/hsa-miR-107	hsa-miR-142-5p	hsa-miR-15b-5p/hsa-miR-15b-5p	hsa-miR-200a-3p	hsa-miR-22-3p	hsa-miR-23a-3p/hsa-miR-23b-3p	hsa-miR-301a-3p	hsa-miR-502-3p	hsa-miR-532-5p
DAPK1	0.000345726	0.0947351	0.171818	5	hsa-let-7a-5p/hsa-let-7e-5p/hsa-let-7f-5p/hsa-let-7g-5p/hsa-miR-98-5p	hsa-miR-143-3p	hsa-miR-200a-3p	hsa-miR-23a-3p/hsa-miR-23b-3p	hsa-miR-26a-5p/hsa-miR-26b-5p
ZCCHC2	0.000349672	0.0947351	0.276136	8	hsa-miR-103a-3p/hsa-miR-107	hsa-miR-142-5p	hsa-miR-148a-3p	hsa-miR-154-3p	hsa-miR-15b-5p/hsa-miR-15b-5p	hsa-miR-199a-5p	hsa-miR-23a-3p/hsa-miR-23b-3p	hsa-miR-26a-5p/hsa-miR-26b-5p
MMS19	0.000370252	0.0947351	0.245455	7	hsa-miR-103a-3p/hsa-miR-107	hsa-miR-148a-3p	hsa-miR-15b-5p/hsa-miR-15b-5p	hsa-miR-22-3p	hsa-miR-23a-3p/hsa-miR-23b-3p	hsa-miR-338-3p	hsa-miR-342-3p
SLC25A37	0.000370252	0.0947351	0.245455	7	hsa-miR-103a-3p/hsa-miR-107	hsa-miR-142-5p	hsa-miR-15b-5p/hsa-miR-15b-5p	hsa-miR-181c-5p	hsa-miR-199a-5p	hsa-miR-221-3p	hsa-miR-26a-5p/hsa-miR-26b-5p
TNFAIP3	0.000370252	0.0947351	0.245455	7	hsa-let-7a-5p/hsa-let-7e-5p/hsa-let-7f-5p/hsa-let-7g-5p/hsa-miR-98-5p	hsa-miR-103a-3p/hsa-miR-107	hsa-miR-142-5p	hsa-miR-200a-3p	hsa-miR-23a-3p/hsa-miR-23b-3p	hsa-miR-27a-3p	hsa-miR-29b-3p
FOXP1	0.000383442	0.0949451	0.415385	13	hsa-let-7a-5p/hsa-let-7e-5p/hsa-let-7f-5p/hsa-let-7g-5p/hsa-miR-98-5p	hsa-miR-103a-3p/hsa-miR-107	hsa-miR-132-3p/hsa-miR-212-3p	hsa-miR-133b	hsa-miR-142-5p	hsa-miR-181c-5p	hsa-miR-200a-3p	hsa-miR-221-3p	hsa-miR-22-3p	hsa-miR-29b-3p	hsa-miR-301a-3p	hsa-miR-338-3p	hsa-miR-532-5p
CHD9	0.000449206	0.107753	0.343636	10	hsa-let-7a-5p/hsa-let-7e-5p/hsa-let-7f-5p/hsa-let-7g-5p/hsa-miR-98-5p	hsa-miR-142-5p	hsa-miR-148a-3p	hsa-miR-15b-5p/hsa-miR-15b-5p	hsa-miR-181c-5p	hsa-miR-200a-3p	hsa-miR-22-3p	hsa-miR-301a-3p	hsa-miR-433-3p	hsa-miR-532-5p
ADAMTS5	0.000481161	0.108896	0.398864	12	hsa-let-7a-5p/hsa-let-7e-5p/hsa-let-7f-5p/hsa-let-7g-5p/hsa-miR-98-5p	hsa-miR-132-3p/hsa-miR-212-3p	hsa-miR-133b	hsa-miR-142-5p	hsa-miR-148a-3p	hsa-miR-15b-5p/hsa-miR-15b-5p	hsa-miR-181c-5p	hsa-miR-199a-5p	hsa-miR-22-3p	hsa-miR-23a-3p/hsa-miR-23b-3p	hsa-miR-27a-3p	hsa-miR-29b-3p
STOX2	0.000482341	0.108896	0.447078	14	hsa-let-7a-5p/hsa-let-7e-5p/hsa-let-7f-5p/hsa-let-7g-5p/hsa-miR-98-5p	hsa-miR-142-5p	hsa-miR-143-3p	hsa-miR-148a-3p	hsa-miR-15b-5p/hsa-miR-15b-5p	hsa-miR-181c-5p	hsa-miR-199a-5p	hsa-miR-221-3p	hsa-miR-22-3p	hsa-miR-23a-3p/hsa-miR-23b-3p	hsa-miR-26a-5p/hsa-miR-26b-5p	hsa-miR-27a-3p	hsa-miR-301a-3p	hsa-miR-433-3p
EPC1	0.000570743	0.119096	0.379339	11	hsa-miR-132-3p/hsa-miR-212-3p	hsa-miR-15b-5p/hsa-miR-15b-5p	hsa-miR-181c-5p	hsa-miR-22-3p	hsa-miR-23a-3p/hsa-miR-23b-3p	hsa-miR-26a-5p/hsa-miR-26b-5p	hsa-miR-27a-3p	hsa-miR-29b-3p	hsa-miR-301a-3p	hsa-miR-342-3p	hsa-miR-532-5p
EMX2	0.00059839	0.119096	0.225	6	hsa-miR-148a-3p	hsa-miR-181c-5p	hsa-miR-191-5p	hsa-miR-221-3p	hsa-miR-22-3p	hsa-miR-301a-3p
SLC2A14	0.00059839	0.119096	0.225	6	hsa-miR-103a-3p/hsa-miR-107	hsa-miR-148a-3p	hsa-miR-15b-5p/hsa-miR-15b-5p	hsa-miR-181c-5p	hsa-miR-26a-5p/hsa-miR-26b-5p	hsa-miR-29b-3p
PCGF3	0.000631735	0.119096	0.355909	10	hsa-let-7a-5p/hsa-let-7e-5p/hsa-let-7f-5p/hsa-let-7g-5p/hsa-miR-98-5p	hsa-miR-132-3p/hsa-miR-212-3p	hsa-miR-142-5p	hsa-miR-154-3p	hsa-miR-200a-3p	hsa-miR-221-3p	hsa-miR-27a-3p	hsa-miR-29b-3p	hsa-miR-338-3p	hsa-miR-532-5p
SYT2	0.000631735	0.119096	0.355909	10	hsa-let-7a-5p/hsa-let-7e-5p/hsa-let-7f-5p/hsa-let-7g-5p/hsa-miR-98-5p	hsa-miR-103a-3p/hsa-miR-107	hsa-miR-133b	hsa-miR-142-5p	hsa-miR-148a-3p	hsa-miR-26a-5p/hsa-miR-26b-5p	hsa-miR-27a-3p	hsa-miR-29b-3p	hsa-miR-301a-3p	hsa-miR-338-3p
LRP4	0.000636128	0.119096	0.262987	7	hsa-miR-142-5p	hsa-miR-148a-3p	hsa-miR-154-3p	hsa-miR-181c-5p	hsa-miR-193a-3p/hsa-miR-193b-3p	hsa-miR-199a-5p	hsa-miR-301a-3p
TRIB2	0.000636128	0.119096	0.262987	7	hsa-let-7a-5p/hsa-let-7e-5p/hsa-let-7f-5p/hsa-let-7g-5p/hsa-miR-98-5p	hsa-miR-132-3p/hsa-miR-212-3p	hsa-miR-154-3p	hsa-miR-193a-3p/hsa-miR-193b-3p	hsa-miR-22-3p	hsa-miR-26a-5p/hsa-miR-26b-5p	hsa-miR-29b-3p
OTUD4	0.000830089	0.134928	0.443706	13	hsa-miR-103a-3p/hsa-miR-107	hsa-miR-133b	hsa-miR-142-5p	hsa-miR-143-3p	hsa-miR-148a-3p	hsa-miR-15b-5p/hsa-miR-15b-5p	hsa-miR-181c-5p	hsa-miR-23a-3p/hsa-miR-23b-3p	hsa-miR-26a-5p/hsa-miR-26b-5p	hsa-miR-29b-3p	hsa-miR-301a-3p	hsa-miR-342-3p	hsa-miR-502-3p
AQP11	0.000843128	0.134928	0.196364	5	hsa-miR-103a-3p/hsa-miR-107	hsa-miR-148a-3p	hsa-miR-15b-5p/hsa-miR-15b-5p	hsa-miR-199a-5p	hsa-miR-27a-3p
AZI2	0.000843128	0.134928	0.196364	5	hsa-miR-221-3p	hsa-miR-23a-3p/hsa-miR-23b-3p	hsa-miR-26a-5p/hsa-miR-26b-5p	hsa-miR-338-3p	hsa-miR-433-3p
GOLM1	0.000843128	0.134928	0.196364	5	hsa-miR-132-3p/hsa-miR-212-3p	hsa-miR-143-3p	hsa-miR-200a-3p	hsa-miR-27a-3p	hsa-miR-342-3p
SIPA1L2	0.000845295	0.134928	0.153409	4	hsa-miR-103a-3p/hsa-miR-107	hsa-miR-15b-5p/hsa-miR-15b-5p	hsa-miR-181c-5p	hsa-miR-200a-3p
TGFBR3	0.000847844	0.134928	0.306818	8	hsa-let-7a-5p/hsa-let-7e-5p/hsa-let-7f-5p/hsa-let-7g-5p/hsa-miR-98-5p	hsa-miR-103a-3p/hsa-miR-107	hsa-miR-15b-5p/hsa-miR-15b-5p	hsa-miR-181c-5p	hsa-miR-193a-3p/hsa-miR-193b-3p	hsa-miR-23a-3p/hsa-miR-23b-3p	hsa-miR-27a-3p	hsa-miR-502-3p
RAB30	0.000872844	0.134928	0.368182	10	hsa-let-7a-5p/hsa-let-7e-5p/hsa-let-7f-5p/hsa-let-7g-5p/hsa-miR-98-5p	hsa-miR-103a-3p/hsa-miR-107	hsa-miR-133b	hsa-miR-15b-5p/hsa-miR-15b-5p	hsa-miR-181c-5p	hsa-miR-200a-3p	hsa-miR-29b-3p	hsa-miR-301a-3p	hsa-miR-338-3p	hsa-miR-502-3p
CAMSAP2	0.000914051	0.134928	0.340909	9	hsa-miR-132-3p/hsa-miR-212-3p	hsa-miR-142-5p	hsa-miR-148a-3p	hsa-miR-181c-5p	hsa-miR-200a-3p	hsa-miR-23a-3p/hsa-miR-23b-3p	hsa-miR-26a-5p/hsa-miR-26b-5p	hsa-miR-29b-3p	hsa-miR-301a-3p
LIN28B	0.000914051	0.134928	0.340909	9	hsa-let-7a-5p/hsa-let-7e-5p/hsa-let-7f-5p/hsa-let-7g-5p/hsa-miR-98-5p	hsa-miR-132-3p/hsa-miR-212-3p	hsa-miR-133b	hsa-miR-148a-3p	hsa-miR-15b-5p/hsa-miR-15b-5p	hsa-miR-181c-5p	hsa-miR-23a-3p/hsa-miR-23b-3p	hsa-miR-26a-5p/hsa-miR-26b-5p	hsa-miR-27a-3p
SERBP1	0.000914051	0.134928	0.340909	9	hsa-miR-142-5p	hsa-miR-148a-3p	hsa-miR-154-3p	hsa-miR-15b-5p/hsa-miR-15b-5p	hsa-miR-26a-5p/hsa-miR-26b-5p	hsa-miR-27a-3p	hsa-miR-29b-3p	hsa-miR-301a-3p	hsa-miR-433-3p
TGFB2	0.000914051	0.134928	0.340909	9	hsa-miR-133b	hsa-miR-142-5p	hsa-miR-148a-3p	hsa-miR-193a-3p/hsa-miR-193b-3p	hsa-miR-199a-5p	hsa-miR-200a-3p	hsa-miR-23a-3p/hsa-miR-23b-3p	hsa-miR-29b-3p	hsa-miR-301a-3p
PTEN	0.000974304	0.135579	0.473377	14	hsa-miR-103a-3p/hsa-miR-107	hsa-miR-132-3p/hsa-miR-212-3p	hsa-miR-142-5p	hsa-miR-148a-3p	hsa-miR-181c-5p	hsa-miR-193a-3p/hsa-miR-193b-3p	hsa-miR-200a-3p	hsa-miR-22-3p	hsa-miR-23a-3p/hsa-miR-23b-3p	hsa-miR-26a-5p/hsa-miR-26b-5p	hsa-miR-29b-3p	hsa-miR-301a-3p	hsa-miR-338-3p	hsa-miR-532-5p
RNF38	0.00102128	0.135579	0.401653	11	hsa-let-7a-5p/hsa-let-7e-5p/hsa-let-7f-5p/hsa-let-7g-5p/hsa-miR-98-5p	hsa-miR-103a-3p/hsa-miR-107	hsa-miR-148a-3p	hsa-miR-154-3p	hsa-miR-181c-5p	hsa-miR-199a-5p	hsa-miR-200a-3p	hsa-miR-23a-3p/hsa-miR-23b-3p	hsa-miR-27a-3p	hsa-miR-301a-3p	hsa-miR-502-3p
CDK17	0.00103602	0.135579	0.280519	7	hsa-miR-142-5p	hsa-miR-15b-5p/hsa-miR-15b-5p	hsa-miR-181c-5p	hsa-miR-193a-3p/hsa-miR-193b-3p	hsa-miR-200a-3p	hsa-miR-23a-3p/hsa-miR-23b-3p	hsa-miR-433-3p
PPP1R15B	0.00103602	0.135579	0.280519	7	hsa-let-7a-5p/hsa-let-7e-5p/hsa-let-7f-5p/hsa-let-7g-5p/hsa-miR-98-5p	hsa-miR-200a-3p	hsa-miR-221-3p	hsa-miR-22-3p	hsa-miR-26a-5p/hsa-miR-26b-5p	hsa-miR-29b-3p	hsa-miR-301a-3p
STXBP5	0.00103602	0.135579	0.280519	7	hsa-let-7a-5p/hsa-let-7e-5p/hsa-let-7f-5p/hsa-let-7g-5p/hsa-miR-98-5p	hsa-miR-148a-3p	hsa-miR-15b-5p/hsa-miR-15b-5p	hsa-miR-181c-5p	hsa-miR-200a-3p	hsa-miR-23a-3p/hsa-miR-23b-3p	hsa-miR-26a-5p/hsa-miR-26b-5p
FIGN	0.00105559	0.135579	0.453147	13	hsa-let-7a-5p/hsa-let-7e-5p/hsa-let-7f-5p/hsa-let-7g-5p/hsa-miR-98-5p	hsa-miR-142-5p	hsa-miR-143-3p	hsa-miR-148a-3p	hsa-miR-181c-5p	hsa-miR-199a-5p	hsa-miR-221-3p	hsa-miR-23a-3p/hsa-miR-23b-3p	hsa-miR-26a-5p/hsa-miR-26b-5p	hsa-miR-27a-3p	hsa-miR-29b-3p	hsa-miR-301a-3p	hsa-miR-342-3p
CDK6	0.00107782	0.135579	0.429545	12	hsa-let-7a-5p/hsa-let-7e-5p/hsa-let-7f-5p/hsa-let-7g-5p/hsa-miR-98-5p	hsa-miR-103a-3p/hsa-miR-107	hsa-miR-142-5p	hsa-miR-148a-3p	hsa-miR-15b-5p/hsa-miR-15b-5p	hsa-miR-191-5p	hsa-miR-200a-3p	hsa-miR-26a-5p/hsa-miR-26b-5p	hsa-miR-27a-3p	hsa-miR-29b-3p	hsa-miR-342-3p	hsa-miR-502-3p
EDNRA	0.00109509	0.135579	0.245455	6	hsa-miR-148a-3p	hsa-miR-15b-5p/hsa-miR-15b-5p	hsa-miR-22-3p	hsa-miR-23a-3p/hsa-miR-23b-3p	hsa-miR-27a-3p	hsa-miR-342-3p
GRB10	0.00109509	0.135579	0.245455	6	hsa-miR-15b-5p/hsa-miR-15b-5p	hsa-miR-181c-5p	hsa-miR-199a-5p	hsa-miR-221-3p	hsa-miR-26a-5p/hsa-miR-26b-5p	hsa-miR-301a-3p
PKDCC	0.00109509	0.135579	0.245455	6	hsa-miR-15b-5p/hsa-miR-15b-5p	hsa-miR-181c-5p	hsa-miR-221-3p	hsa-miR-23a-3p/hsa-miR-23b-3p	hsa-miR-301a-3p	hsa-miR-342-3p
SIX4	0.00125645	0.147237	0.322159	8	hsa-miR-103a-3p/hsa-miR-107	hsa-miR-132-3p/hsa-miR-212-3p	hsa-miR-142-5p	hsa-miR-143-3p	hsa-miR-148a-3p	hsa-miR-181c-5p	hsa-miR-23a-3p/hsa-miR-23b-3p	hsa-miR-301a-3p
ETNK1	0.00158864	0.147237	0.392727	10	hsa-let-7a-5p/hsa-let-7e-5p/hsa-let-7f-5p/hsa-let-7g-5p/hsa-miR-98-5p	hsa-miR-103a-3p/hsa-miR-107	hsa-miR-132-3p/hsa-miR-212-3p	hsa-miR-148a-3p	hsa-miR-15b-5p/hsa-miR-15b-5p	hsa-miR-181c-5p	hsa-miR-200a-3p	hsa-miR-23a-3p/hsa-miR-23b-3p	hsa-miR-26a-5p/hsa-miR-26b-5p	hsa-miR-301a-3p
CNR1	0.00161313	0.147237	0.298052	7	hsa-miR-148a-3p	hsa-miR-154-3p	hsa-miR-181c-5p	hsa-miR-23a-3p/hsa-miR-23b-3p	hsa-miR-26a-5p/hsa-miR-26b-5p	hsa-miR-29b-3p	hsa-miR-301a-3p
ADAP1	0.00167091	0.147237	0.122727	3	hsa-miR-103a-3p/hsa-miR-107	hsa-miR-15b-5p/hsa-miR-15b-5p	hsa-miR-27a-3p
CTD-2140B24.4	0.00167091	0.147237	0.122727	3	hsa-miR-148a-3p	hsa-miR-181c-5p	hsa-miR-27a-3p
EGLN2	0.00167091	0.147237	0.122727	3	hsa-let-7a-5p/hsa-let-7e-5p/hsa-let-7f-5p/hsa-let-7g-5p/hsa-miR-98-5p	hsa-miR-15b-5p/hsa-miR-15b-5p	hsa-miR-23a-3p/hsa-miR-23b-3p
GBP1	0.00167091	0.147237	0.122727	3	hsa-miR-199a-5p	hsa-miR-23a-3p/hsa-miR-23b-3p	hsa-miR-532-5p
GPSM1	0.00167091	0.147237	0.122727	3	hsa-miR-181c-5p	hsa-miR-23a-3p/hsa-miR-23b-3p	hsa-miR-26a-5p/hsa-miR-26b-5p
KIAA1737	0.00167091	0.147237	0.122727	3	hsa-miR-23a-3p/hsa-miR-23b-3p	hsa-miR-26a-5p/hsa-miR-26b-5p	hsa-miR-27a-3p
MSTN	0.00167091	0.147237	0.122727	3	hsa-miR-26a-5p/hsa-miR-26b-5p	hsa-miR-27a-3p	hsa-miR-29b-3p
NOS1	0.00167091	0.147237	0.122727	3	hsa-let-7a-5p/hsa-let-7e-5p/hsa-let-7f-5p/hsa-let-7g-5p/hsa-miR-98-5p	hsa-miR-103a-3p/hsa-miR-107	hsa-miR-15b-5p/hsa-miR-15b-5p
PABPC1L	0.00167091	0.147237	0.122727	3	hsa-miR-103a-3p/hsa-miR-107	hsa-miR-15b-5p/hsa-miR-15b-5p	hsa-miR-338-3p
PWWP2B	0.00167091	0.147237	0.122727	3	hsa-miR-103a-3p/hsa-miR-107	hsa-miR-133b	hsa-miR-15b-5p/hsa-miR-15b-5p
RASAL1	0.00167091	0.147237	0.122727	3	hsa-miR-148a-3p	hsa-miR-301a-3p	hsa-miR-338-3p
SEMA3C	0.00167091	0.147237	0.122727	3	hsa-miR-154-3p	hsa-miR-181c-5p	hsa-miR-502-3p
TMEM9B	0.00167091	0.147237	0.122727	3	hsa-miR-148a-3p	hsa-miR-27a-3p	hsa-miR-301a-3p
UBR4	0.00167091	0.147237	0.122727	3	hsa-miR-103a-3p/hsa-miR-107	hsa-miR-15b-5p/hsa-miR-15b-5p	hsa-miR-26a-5p/hsa-miR-26b-5p
ZNF268	0.00167091	0.147237	0.122727	3	hsa-miR-148a-3p	hsa-miR-181c-5p	hsa-miR-27a-3p
COL27A1	0.0017347	0.147237	0.220909	5	hsa-let-7a-5p/hsa-let-7e-5p/hsa-let-7f-5p/hsa-let-7g-5p/hsa-miR-98-5p	hsa-miR-143-3p	hsa-miR-23a-3p/hsa-miR-23b-3p	hsa-miR-27a-3p	hsa-miR-29b-3p
KIAA0319L	0.0017347	0.147237	0.220909	5	hsa-miR-15b-5p/hsa-miR-15b-5p	hsa-miR-22-3p	hsa-miR-26a-5p/hsa-miR-26b-5p	hsa-miR-27a-3p	hsa-miR-301a-3p
PDHX	0.0017347	0.147237	0.220909	5	hsa-miR-154-3p	hsa-miR-181c-5p	hsa-miR-26a-5p/hsa-miR-26b-5p	hsa-miR-27a-3p	hsa-miR-29b-3p
SESN2	0.0017347	0.147237	0.220909	5	hsa-miR-148a-3p	hsa-miR-15b-5p/hsa-miR-15b-5p	hsa-miR-200a-3p	hsa-miR-23a-3p/hsa-miR-23b-3p	hsa-miR-27a-3p
TMC7	0.0017347	0.147237	0.220909	5	hsa-let-7a-5p/hsa-let-7e-5p/hsa-let-7f-5p/hsa-let-7g-5p/hsa-miR-98-5p	hsa-miR-103a-3p/hsa-miR-107	hsa-miR-15b-5p/hsa-miR-15b-5p	hsa-miR-191-5p	hsa-miR-26a-5p/hsa-miR-26b-5p
ITGB8	0.00174065	0.147237	0.423967	11	hsa-let-7a-5p/hsa-let-7e-5p/hsa-let-7f-5p/hsa-let-7g-5p/hsa-miR-98-5p	hsa-miR-142-5p	hsa-miR-143-3p	hsa-miR-148a-3p	hsa-miR-181c-5p	hsa-miR-221-3p	hsa-miR-22-3p	hsa-miR-26a-5p/hsa-miR-26b-5p	hsa-miR-27a-3p	hsa-miR-301a-3p	hsa-miR-532-5p
KATNBL1	0.00181083	0.147237	0.3375	8	hsa-let-7a-5p/hsa-let-7e-5p/hsa-let-7f-5p/hsa-let-7g-5p/hsa-miR-98-5p	hsa-miR-103a-3p/hsa-miR-107	hsa-miR-15b-5p/hsa-miR-15b-5p	hsa-miR-181c-5p	hsa-miR-22-3p	hsa-miR-27a-3p	hsa-miR-29b-3p	hsa-miR-301a-3p
KMT2C	0.00181083	0.147237	0.3375	8	hsa-miR-133b	hsa-miR-15b-5p/hsa-miR-15b-5p	hsa-miR-181c-5p	hsa-miR-200a-3p	hsa-miR-221-3p	hsa-miR-26a-5p/hsa-miR-26b-5p	hsa-miR-27a-3p	hsa-miR-301a-3p
NRAS	0.00181083	0.147237	0.3375	8	hsa-let-7a-5p/hsa-let-7e-5p/hsa-let-7f-5p/hsa-let-7g-5p/hsa-miR-98-5p	hsa-miR-143-3p	hsa-miR-148a-3p	hsa-miR-181c-5p	hsa-miR-22-3p	hsa-miR-26a-5p/hsa-miR-26b-5p	hsa-miR-27a-3p	hsa-miR-29b-3p
ENPP5	0.00186061	0.147237	0.265909	6	hsa-miR-133b	hsa-miR-142-5p	hsa-miR-143-3p	hsa-miR-200a-3p	hsa-miR-23a-3p/hsa-miR-23b-3p	hsa-miR-301a-3p
FAF1	0.00186061	0.147237	0.265909	6	hsa-miR-15b-5p/hsa-miR-15b-5p	hsa-miR-181c-5p	hsa-miR-193a-3p/hsa-miR-193b-3p	hsa-miR-26a-5p/hsa-miR-26b-5p	hsa-miR-338-3p	hsa-miR-342-3p
MTMR4	0.00186061	0.147237	0.265909	6	hsa-miR-103a-3p/hsa-miR-107	hsa-miR-133b	hsa-miR-15b-5p/hsa-miR-15b-5p	hsa-miR-27a-3p	hsa-miR-29b-3p	hsa-miR-532-5p
PNRC2	0.00186061	0.147237	0.265909	6	hsa-miR-148a-3p	hsa-miR-15b-5p/hsa-miR-15b-5p	hsa-miR-181c-5p	hsa-miR-221-3p	hsa-miR-23a-3p/hsa-miR-23b-3p	hsa-miR-27a-3p
SLC2A3	0.00186061	0.147237	0.265909	6	hsa-miR-103a-3p/hsa-miR-107	hsa-miR-148a-3p	hsa-miR-15b-5p/hsa-miR-15b-5p	hsa-miR-181c-5p	hsa-miR-26a-5p/hsa-miR-26b-5p	hsa-miR-29b-3p
USP42	0.00186061	0.147237	0.265909	6	hsa-miR-103a-3p/hsa-miR-107	hsa-miR-143-3p	hsa-miR-15b-5p/hsa-miR-15b-5p	hsa-miR-181c-5p	hsa-miR-27a-3p	hsa-miR-29b-3p
XKRX	0.00186061	0.147237	0.265909	6	hsa-let-7a-5p/hsa-let-7e-5p/hsa-let-7f-5p/hsa-let-7g-5p/hsa-miR-98-5p	hsa-miR-23a-3p/hsa-miR-23b-3p	hsa-miR-29b-3p	hsa-miR-301a-3p	hsa-miR-338-3p	hsa-miR-342-3p
ZDHHC7	0.00186061	0.147237	0.265909	6	hsa-miR-148a-3p	hsa-miR-181c-5p	hsa-miR-200a-3p	hsa-miR-26a-5p/hsa-miR-26b-5p	hsa-miR-301a-3p	hsa-miR-433-3p
KMT2A	0.00223545	0.172888	0.435124	11	hsa-miR-148a-3p	hsa-miR-15b-5p/hsa-miR-15b-5p	hsa-miR-181c-5p	hsa-miR-193a-3p/hsa-miR-193b-3p	hsa-miR-200a-3p	hsa-miR-221-3p	hsa-miR-22-3p	hsa-miR-27a-3p	hsa-miR-301a-3p	hsa-miR-342-3p	hsa-miR-433-3p
CDC25B	0.00231989	0.172888	0.184091	4	hsa-miR-148a-3p	hsa-miR-15b-5p/hsa-miR-15b-5p	hsa-miR-200a-3p	hsa-miR-27a-3p
CHCHD4	0.00231989	0.172888	0.184091	4	hsa-miR-143-3p	hsa-miR-181c-5p	hsa-miR-199a-5p	hsa-miR-338-3p
CRELD1	0.00231989	0.172888	0.184091	4	hsa-miR-103a-3p/hsa-miR-107	hsa-miR-143-3p	hsa-miR-29b-3p	hsa-miR-338-3p
PRKCD	0.00231989	0.172888	0.184091	4	hsa-miR-15b-5p/hsa-miR-15b-5p	hsa-miR-181c-5p	hsa-miR-26a-5p/hsa-miR-26b-5p	hsa-miR-27a-3p
ZNF579	0.00231989	0.172888	0.184091	4	hsa-miR-199a-5p	hsa-miR-23a-3p/hsa-miR-23b-3p	hsa-miR-27a-3p	hsa-miR-338-3p
MYBL1	0.00241714	0.176705	0.315584	7	hsa-miR-103a-3p/hsa-miR-107	hsa-miR-148a-3p	hsa-miR-15b-5p/hsa-miR-15b-5p	hsa-miR-181c-5p	hsa-miR-200a-3p	hsa-miR-221-3p	hsa-miR-301a-3p
SV2A	0.00241714	0.176705	0.315584	7	hsa-miR-132-3p/hsa-miR-212-3p	hsa-miR-133b	hsa-miR-22-3p	hsa-miR-23a-3p/hsa-miR-23b-3p	hsa-miR-27a-3p	hsa-miR-338-3p	hsa-miR-342-3p
E2F7	0.00254591	0.184362	0.352841	8	hsa-miR-133b	hsa-miR-148a-3p	hsa-miR-15b-5p/hsa-miR-15b-5p	hsa-miR-181c-5p	hsa-miR-26a-5p/hsa-miR-26b-5p	hsa-miR-27a-3p	hsa-miR-29b-3p	hsa-miR-301a-3p
CPEB3	0.00276685	0.198489	0.470455	12	hsa-let-7a-5p/hsa-let-7e-5p/hsa-let-7f-5p/hsa-let-7g-5p/hsa-miR-98-5p	hsa-miR-103a-3p/hsa-miR-107	hsa-miR-142-5p	hsa-miR-15b-5p/hsa-miR-15b-5p	hsa-miR-221-3p	hsa-miR-23a-3p/hsa-miR-23b-3p	hsa-miR-26a-5p/hsa-miR-26b-5p	hsa-miR-27a-3p	hsa-miR-29b-3p	hsa-miR-301a-3p	hsa-miR-338-3p	hsa-miR-532-5p
CBLB	0.00297837	0.202318	0.286364	6	hsa-miR-142-5p	hsa-miR-148a-3p	hsa-miR-181c-5p	hsa-miR-23a-3p/hsa-miR-23b-3p	hsa-miR-27a-3p	hsa-miR-301a-3p
HTR2A	0.00297837	0.202318	0.286364	6	hsa-miR-142-5p	hsa-miR-143-3p	hsa-miR-15b-5p/hsa-miR-15b-5p	hsa-miR-200a-3p	hsa-miR-23a-3p/hsa-miR-23b-3p	hsa-miR-26a-5p/hsa-miR-26b-5p
KPNA5	0.00297837	0.202318	0.286364	6	hsa-let-7a-5p/hsa-let-7e-5p/hsa-let-7f-5p/hsa-let-7g-5p/hsa-miR-98-5p	hsa-miR-15b-5p/hsa-miR-15b-5p	hsa-miR-23a-3p/hsa-miR-23b-3p	hsa-miR-26a-5p/hsa-miR-26b-5p	hsa-miR-27a-3p	hsa-miR-433-3p
LRCH1	0.00297837	0.202318	0.286364	6	hsa-miR-142-5p	hsa-miR-148a-3p	hsa-miR-22-3p	hsa-miR-23a-3p/hsa-miR-23b-3p	hsa-miR-26a-5p/hsa-miR-26b-5p	hsa-miR-301a-3p
SLC16A6	0.00297837	0.202318	0.286364	6	hsa-miR-148a-3p	hsa-miR-181c-5p	hsa-miR-193a-3p/hsa-miR-193b-3p	hsa-miR-221-3p	hsa-miR-23a-3p/hsa-miR-23b-3p	hsa-miR-26a-5p/hsa-miR-26b-5p
UBE2D1	0.00297837	0.202318	0.286364	6	hsa-miR-142-5p	hsa-miR-148a-3p	hsa-miR-23a-3p/hsa-miR-23b-3p	hsa-miR-26a-5p/hsa-miR-26b-5p	hsa-miR-27a-3p	hsa-miR-301a-3p
CLIP1	0.0031722	0.204065	0.245455	5	hsa-miR-103a-3p/hsa-miR-107	hsa-miR-181c-5p	hsa-miR-199a-5p	hsa-miR-301a-3p	hsa-miR-433-3p
GNB4	0.0031722	0.204065	0.245455	5	hsa-miR-133b	hsa-miR-181c-5p	hsa-miR-27a-3p	hsa-miR-29b-3p	hsa-miR-532-5p
NAP1L5	0.0031722	0.204065	0.245455	5	hsa-miR-221-3p	hsa-miR-23a-3p/hsa-miR-23b-3p	hsa-miR-26a-5p/hsa-miR-26b-5p	hsa-miR-27a-3p	hsa-miR-502-3p
SALL3	0.0031722	0.204065	0.245455	5	hsa-let-7a-5p/hsa-let-7e-5p/hsa-let-7f-5p/hsa-let-7g-5p/hsa-miR-98-5p	hsa-miR-132-3p/hsa-miR-212-3p	hsa-miR-15b-5p/hsa-miR-15b-5p	hsa-miR-181c-5p	hsa-miR-301a-3p
SLITRK1	0.0031722	0.204065	0.245455	5	hsa-miR-103a-3p/hsa-miR-107	hsa-miR-15b-5p/hsa-miR-15b-5p	hsa-miR-181c-5p	hsa-miR-27a-3p	hsa-miR-532-5p
SRSF11	0.0031722	0.204065	0.245455	5	hsa-miR-143-3p	hsa-miR-148a-3p	hsa-miR-15b-5p/hsa-miR-15b-5p	hsa-miR-181c-5p	hsa-miR-26a-5p/hsa-miR-26b-5p
LAMC1	0.00319018	0.204065	0.395455	9	hsa-miR-15b-5p/hsa-miR-15b-5p	hsa-miR-181c-5p	hsa-miR-193a-3p/hsa-miR-193b-3p	hsa-miR-199a-5p	hsa-miR-22-3p	hsa-miR-29b-3p	hsa-miR-301a-3p	hsa-miR-338-3p	hsa-miR-433-3p
CNOT6	0.00350066	0.211085	0.368182	8	hsa-miR-148a-3p	hsa-miR-193a-3p/hsa-miR-193b-3p	hsa-miR-199a-5p	hsa-miR-221-3p	hsa-miR-29b-3p	hsa-miR-301a-3p	hsa-miR-338-3p	hsa-miR-433-3p
JMJD1C	0.00350066	0.211085	0.368182	8	hsa-miR-142-5p	hsa-miR-148a-3p	hsa-miR-15b-5p/hsa-miR-15b-5p	hsa-miR-200a-3p	hsa-miR-23a-3p/hsa-miR-23b-3p	hsa-miR-27a-3p	hsa-miR-29b-3p	hsa-miR-338-3p
SIRT1	0.00350066	0.211085	0.368182	8	hsa-miR-132-3p/hsa-miR-212-3p	hsa-miR-133b	hsa-miR-154-3p	hsa-miR-181c-5p	hsa-miR-199a-5p	hsa-miR-200a-3p	hsa-miR-22-3p	hsa-miR-29b-3p
WAPAL	0.00350066	0.211085	0.368182	8	hsa-let-7a-5p/hsa-let-7e-5p/hsa-let-7f-5p/hsa-let-7g-5p/hsa-miR-98-5p	hsa-miR-148a-3p	hsa-miR-15b-5p/hsa-miR-15b-5p	hsa-miR-199a-5p	hsa-miR-200a-3p	hsa-miR-22-3p	hsa-miR-26a-5p/hsa-miR-26b-5p	hsa-miR-338-3p
LARP4	0.00350376	0.211085	0.333117	7	hsa-miR-143-3p	hsa-miR-181c-5p	hsa-miR-199a-5p	hsa-miR-26a-5p/hsa-miR-26b-5p	hsa-miR-27a-3p	hsa-miR-29b-3p	hsa-miR-338-3p
UBE2Q1	0.00350376	0.211085	0.333117	7	hsa-miR-103a-3p/hsa-miR-107	hsa-miR-133b	hsa-miR-154-3p	hsa-miR-15b-5p/hsa-miR-15b-5p	hsa-miR-199a-5p	hsa-miR-27a-3p	hsa-miR-338-3p
BRWD1	0.00351992	0.211085	0.429545	10	hsa-miR-132-3p/hsa-miR-212-3p	hsa-miR-142-5p	hsa-miR-181c-5p	hsa-miR-200a-3p	hsa-miR-221-3p	hsa-miR-23a-3p/hsa-miR-23b-3p	hsa-miR-26a-5p/hsa-miR-26b-5p	hsa-miR-29b-3p	hsa-miR-301a-3p	hsa-miR-433-3p
WNK3	0.00351992	0.211085	0.429545	10	hsa-let-7a-5p/hsa-let-7e-5p/hsa-let-7f-5p/hsa-let-7g-5p/hsa-miR-98-5p	hsa-miR-15b-5p/hsa-miR-15b-5p	hsa-miR-181c-5p	hsa-miR-199a-5p	hsa-miR-221-3p	hsa-miR-23a-3p/hsa-miR-23b-3p	hsa-miR-26a-5p/hsa-miR-26b-5p	hsa-miR-27a-3p	hsa-miR-301a-3p	hsa-miR-433-3p
RFX3	0.00357895	0.212962	0.457438	11	hsa-miR-132-3p/hsa-miR-212-3p	hsa-miR-133b	hsa-miR-15b-5p/hsa-miR-15b-5p	hsa-miR-181c-5p	hsa-miR-191-5p	hsa-miR-193a-3p/hsa-miR-193b-3p	hsa-miR-199a-5p	hsa-miR-221-3p	hsa-miR-26a-5p/hsa-miR-26b-5p	hsa-miR-27a-3p	hsa-miR-342-3p
ZNF652	0.0040181	0.230378	0.53474	14	hsa-let-7a-5p/hsa-let-7e-5p/hsa-let-7f-5p/hsa-let-7g-5p/hsa-miR-98-5p	hsa-miR-103a-3p/hsa-miR-107	hsa-miR-132-3p/hsa-miR-212-3p	hsa-miR-15b-5p/hsa-miR-15b-5p	hsa-miR-181c-5p	hsa-miR-199a-5p	hsa-miR-221-3p	hsa-miR-22-3p	hsa-miR-23a-3p/hsa-miR-23b-3p	hsa-miR-26a-5p/hsa-miR-26b-5p	hsa-miR-301a-3p	hsa-miR-338-3p	hsa-miR-342-3p	hsa-miR-433-3p
HAPLN1	0.00418332	0.230378	0.409091	9	hsa-miR-132-3p/hsa-miR-212-3p	hsa-miR-133b	hsa-miR-181c-5p	hsa-miR-199a-5p	hsa-miR-23a-3p/hsa-miR-23b-3p	hsa-miR-26a-5p/hsa-miR-26b-5p	hsa-miR-27a-3p	hsa-miR-29b-3p	hsa-miR-338-3p
PAN3	0.00418332	0.230378	0.409091	9	hsa-miR-132-3p/hsa-miR-212-3p	hsa-miR-133b	hsa-miR-143-3p	hsa-miR-148a-3p	hsa-miR-181c-5p	hsa-miR-199a-5p	hsa-miR-26a-5p/hsa-miR-26b-5p	hsa-miR-27a-3p	hsa-miR-301a-3p
TBL1XR1	0.00418332	0.230378	0.409091	9	hsa-miR-103a-3p/hsa-miR-107	hsa-miR-148a-3p	hsa-miR-15b-5p/hsa-miR-15b-5p	hsa-miR-181c-5p	hsa-miR-193a-3p/hsa-miR-193b-3p	hsa-miR-199a-5p	hsa-miR-26a-5p/hsa-miR-26b-5p	hsa-miR-301a-3p	hsa-miR-338-3p
SH3PXD2A	0.00422265	0.230378	0.490909	12	hsa-miR-103a-3p/hsa-miR-107	hsa-miR-143-3p	hsa-miR-148a-3p	hsa-miR-199a-5p	hsa-miR-22-3p	hsa-miR-23a-3p/hsa-miR-23b-3p	hsa-miR-26a-5p/hsa-miR-26b-5p	hsa-miR-29b-3p	hsa-miR-301a-3p	hsa-miR-338-3p	hsa-miR-502-3p	hsa-miR-532-5p
BBX	0.00448093	0.230378	0.441818	10	hsa-let-7a-5p/hsa-let-7e-5p/hsa-let-7f-5p/hsa-let-7g-5p/hsa-miR-98-5p	hsa-miR-132-3p/hsa-miR-212-3p	hsa-miR-142-5p	hsa-miR-148a-3p	hsa-miR-200a-3p	hsa-miR-23a-3p/hsa-miR-23b-3p	hsa-miR-26a-5p/hsa-miR-26b-5p	hsa-miR-27a-3p	hsa-miR-301a-3p	hsa-miR-338-3p
IGF1	0.00448093	0.230378	0.441818	10	hsa-let-7a-5p/hsa-let-7e-5p/hsa-let-7f-5p/hsa-let-7g-5p/hsa-miR-98-5p	hsa-miR-142-5p	hsa-miR-148a-3p	hsa-miR-15b-5p/hsa-miR-15b-5p	hsa-miR-221-3p	hsa-miR-26a-5p/hsa-miR-26b-5p	hsa-miR-27a-3p	hsa-miR-29b-3p	hsa-miR-301a-3p	hsa-miR-338-3p
NLK	0.00448093	0.230378	0.441818	10	hsa-let-7a-5p/hsa-let-7e-5p/hsa-let-7f-5p/hsa-let-7g-5p/hsa-miR-98-5p	hsa-miR-132-3p/hsa-miR-212-3p	hsa-miR-148a-3p	hsa-miR-154-3p	hsa-miR-181c-5p	hsa-miR-199a-5p	hsa-miR-221-3p	hsa-miR-23a-3p/hsa-miR-23b-3p	hsa-miR-26a-5p/hsa-miR-26b-5p	hsa-miR-27a-3p
STYX	0.00448093	0.230378	0.441818	10	hsa-let-7a-5p/hsa-let-7e-5p/hsa-let-7f-5p/hsa-let-7g-5p/hsa-miR-98-5p	hsa-miR-103a-3p/hsa-miR-107	hsa-miR-142-5p	hsa-miR-154-3p	hsa-miR-15b-5p/hsa-miR-15b-5p	hsa-miR-221-3p	hsa-miR-22-3p	hsa-miR-26a-5p/hsa-miR-26b-5p	hsa-miR-338-3p	hsa-miR-433-3p
AMMECR1L	0.00453987	0.230378	0.306818	6	hsa-let-7a-5p/hsa-let-7e-5p/hsa-let-7f-5p/hsa-let-7g-5p/hsa-miR-98-5p	hsa-miR-15b-5p/hsa-miR-15b-5p	hsa-miR-191-5p	hsa-miR-22-3p	hsa-miR-27a-3p	hsa-miR-29b-3p
FBXL19	0.00453987	0.230378	0.306818	6	hsa-let-7a-5p/hsa-let-7e-5p/hsa-let-7f-5p/hsa-let-7g-5p/hsa-miR-98-5p	hsa-miR-133b	hsa-miR-148a-3p	hsa-miR-200a-3p	hsa-miR-22-3p	hsa-miR-26a-5p/hsa-miR-26b-5p
LMLN	0.00453987	0.230378	0.306818	6	hsa-let-7a-5p/hsa-let-7e-5p/hsa-let-7f-5p/hsa-let-7g-5p/hsa-miR-98-5p	hsa-miR-132-3p/hsa-miR-212-3p	hsa-miR-200a-3p	hsa-miR-26a-5p/hsa-miR-26b-5p	hsa-miR-29b-3p	hsa-miR-301a-3p
TAB3	0.00453987	0.230378	0.306818	6	hsa-miR-15b-5p/hsa-miR-15b-5p	hsa-miR-181c-5p	hsa-miR-199a-5p	hsa-miR-23a-3p/hsa-miR-23b-3p	hsa-miR-26a-5p/hsa-miR-26b-5p	hsa-miR-27a-3p
SOX6	0.00463337	0.230378	0.519231	13	hsa-let-7a-5p/hsa-let-7e-5p/hsa-let-7f-5p/hsa-let-7g-5p/hsa-miR-98-5p	hsa-miR-103a-3p/hsa-miR-107	hsa-miR-132-3p/hsa-miR-212-3p	hsa-miR-143-3p	hsa-miR-15b-5p/hsa-miR-15b-5p	hsa-miR-181c-5p	hsa-miR-199a-5p	hsa-miR-200a-3p	hsa-miR-23a-3p/hsa-miR-23b-3p	hsa-miR-26a-5p/hsa-miR-26b-5p	hsa-miR-29b-3p	hsa-miR-338-3p	hsa-miR-342-3p
C1GALT1	0.00471789	0.230378	0.383523	8	hsa-let-7a-5p/hsa-let-7e-5p/hsa-let-7f-5p/hsa-let-7g-5p/hsa-miR-98-5p	hsa-miR-148a-3p	hsa-miR-181c-5p	hsa-miR-193a-3p/hsa-miR-193b-3p	hsa-miR-199a-5p	hsa-miR-200a-3p	hsa-miR-26a-5p/hsa-miR-26b-5p	hsa-miR-27a-3p
MAP3K9	0.00471789	0.230378	0.383523	8	hsa-let-7a-5p/hsa-let-7e-5p/hsa-let-7f-5p/hsa-let-7g-5p/hsa-miR-98-5p	hsa-miR-132-3p/hsa-miR-212-3p	hsa-miR-148a-3p	hsa-miR-15b-5p/hsa-miR-15b-5p	hsa-miR-181c-5p	hsa-miR-23a-3p/hsa-miR-23b-3p	hsa-miR-26a-5p/hsa-miR-26b-5p	hsa-miR-301a-3p
QKI	0.00481131	0.230378	0.543506	14	hsa-miR-132-3p/hsa-miR-212-3p	hsa-miR-133b	hsa-miR-142-5p	hsa-miR-143-3p	hsa-miR-148a-3p	hsa-miR-15b-5p/hsa-miR-15b-5p	hsa-miR-181c-5p	hsa-miR-200a-3p	hsa-miR-221-3p	hsa-miR-23a-3p/hsa-miR-23b-3p	hsa-miR-27a-3p	hsa-miR-29b-3p	hsa-miR-301a-3p	hsa-miR-433-3p
CTIF	0.00493387	0.230378	0.350649	7	hsa-let-7a-5p/hsa-let-7e-5p/hsa-let-7f-5p/hsa-let-7g-5p/hsa-miR-98-5p	hsa-miR-15b-5p/hsa-miR-15b-5p	hsa-miR-181c-5p	hsa-miR-193a-3p/hsa-miR-193b-3p	hsa-miR-221-3p	hsa-miR-22-3p	hsa-miR-301a-3p
WNK1	0.00493387	0.230378	0.350649	7	hsa-miR-103a-3p/hsa-miR-107	hsa-miR-181c-5p	hsa-miR-23a-3p/hsa-miR-23b-3p	hsa-miR-26a-5p/hsa-miR-26b-5p	hsa-miR-27a-3p	hsa-miR-301a-3p	hsa-miR-338-3p
ARHGAP17	0.0049521	0.230378	0.214773	4	hsa-miR-103a-3p/hsa-miR-107	hsa-miR-132-3p/hsa-miR-212-3p	hsa-miR-15b-5p/hsa-miR-15b-5p	hsa-miR-199a-5p
ARRDC4	0.0049521	0.230378	0.214773	4	hsa-let-7a-5p/hsa-let-7e-5p/hsa-let-7f-5p/hsa-let-7g-5p/hsa-miR-98-5p	hsa-miR-15b-5p/hsa-miR-15b-5p	hsa-miR-27a-3p	hsa-miR-29b-3p
CAMKK1	0.0049521	0.230378	0.214773	4	hsa-miR-103a-3p/hsa-miR-107	hsa-miR-148a-3p	hsa-miR-181c-5p	hsa-miR-221-3p
CCNL2	0.0049521	0.230378	0.214773	4	hsa-miR-200a-3p	hsa-miR-23a-3p/hsa-miR-23b-3p	hsa-miR-26a-5p/hsa-miR-26b-5p	hsa-miR-29b-3p
DMRT3	0.0049521	0.230378	0.214773	4	hsa-miR-221-3p	hsa-miR-26a-5p/hsa-miR-26b-5p	hsa-miR-27a-3p	hsa-miR-301a-3p
FP15737	0.0049521	0.230378	0.214773	4	hsa-miR-103a-3p/hsa-miR-107	hsa-miR-142-5p	hsa-miR-15b-5p/hsa-miR-15b-5p	hsa-miR-199a-5p
HOXD1	0.0049521	0.230378	0.214773	4	hsa-let-7a-5p/hsa-let-7e-5p/hsa-let-7f-5p/hsa-let-7g-5p/hsa-miR-98-5p	hsa-miR-133b	hsa-miR-181c-5p	hsa-miR-301a-3p
LOXL4	0.0049521	0.230378	0.214773	4	hsa-let-7a-5p/hsa-let-7e-5p/hsa-let-7f-5p/hsa-let-7g-5p/hsa-miR-98-5p	hsa-miR-133b	hsa-miR-193a-3p/hsa-miR-193b-3p	hsa-miR-29b-3p
MIF4GD	0.0049521	0.230378	0.214773	4	hsa-miR-103a-3p/hsa-miR-107	hsa-miR-15b-5p/hsa-miR-15b-5p	hsa-miR-29b-3p	hsa-miR-338-3p
MNX1	0.0049521	0.230378	0.214773	4	hsa-miR-181c-5p	hsa-miR-200a-3p	hsa-miR-26a-5p/hsa-miR-26b-5p	hsa-miR-338-3p
NIPAL4	0.0049521	0.230378	0.214773	4	hsa-let-7a-5p/hsa-let-7e-5p/hsa-let-7f-5p/hsa-let-7g-5p/hsa-miR-98-5p	hsa-miR-181c-5p	hsa-miR-221-3p	hsa-miR-27a-3p
PDIA6	0.0049521	0.230378	0.214773	4	hsa-miR-143-3p	hsa-miR-15b-5p/hsa-miR-15b-5p	hsa-miR-181c-5p	hsa-miR-23a-3p/hsa-miR-23b-3p
PLEKHF2	0.0049521	0.230378	0.214773	4	hsa-miR-103a-3p/hsa-miR-107	hsa-miR-23a-3p/hsa-miR-23b-3p	hsa-miR-29b-3p	hsa-miR-301a-3p
SFT2D3	0.0049521	0.230378	0.214773	4	hsa-let-7a-5p/hsa-let-7e-5p/hsa-let-7f-5p/hsa-let-7g-5p/hsa-miR-98-5p	hsa-miR-133b	hsa-miR-23a-3p/hsa-miR-23b-3p	hsa-miR-26a-5p/hsa-miR-26b-5p
SLC25A44	0.0049521	0.230378	0.214773	4	hsa-miR-148a-3p	hsa-miR-27a-3p	hsa-miR-29b-3p	hsa-miR-301a-3p
WISP1	0.0049521	0.230378	0.214773	4	hsa-miR-15b-5p/hsa-miR-15b-5p	hsa-miR-23a-3p/hsa-miR-23b-3p	hsa-miR-27a-3p	hsa-miR-29b-3p
ZNF667	0.0049521	0.230378	0.214773	4	hsa-miR-181c-5p	hsa-miR-199a-5p	hsa-miR-23a-3p/hsa-miR-23b-3p	hsa-miR-532-5p
CAMK2A	0.00531703	0.23141	0.27	5	hsa-miR-142-5p	hsa-miR-148a-3p	hsa-miR-26a-5p/hsa-miR-26b-5p	hsa-miR-27a-3p	hsa-miR-338-3p
CD69	0.00531703	0.23141	0.27	5	hsa-miR-103a-3p/hsa-miR-107	hsa-miR-142-5p	hsa-miR-15b-5p/hsa-miR-15b-5p	hsa-miR-181c-5p	hsa-miR-301a-3p
ITGA11	0.00531703	0.23141	0.27	5	hsa-miR-143-3p	hsa-miR-148a-3p	hsa-miR-29b-3p	hsa-miR-301a-3p	hsa-miR-532-5p
LBR	0.00531703	0.23141	0.27	5	hsa-let-7a-5p/hsa-let-7e-5p/hsa-let-7f-5p/hsa-let-7g-5p/hsa-miR-98-5p	hsa-miR-148a-3p	hsa-miR-181c-5p	hsa-miR-23a-3p/hsa-miR-23b-3p	hsa-miR-301a-3p
MED28	0.00531703	0.23141	0.27	5	hsa-let-7a-5p/hsa-let-7e-5p/hsa-let-7f-5p/hsa-let-7g-5p/hsa-miR-98-5p	hsa-miR-142-5p	hsa-miR-22-3p	hsa-miR-23a-3p/hsa-miR-23b-3p	hsa-miR-29b-3p
PLCL2	0.00531703	0.23141	0.27	5	hsa-miR-133b	hsa-miR-181c-5p	hsa-miR-221-3p	hsa-miR-27a-3p	hsa-miR-301a-3p
SEC24A	0.00531703	0.23141	0.27	5	hsa-miR-132-3p/hsa-miR-212-3p	hsa-miR-15b-5p/hsa-miR-15b-5p	hsa-miR-200a-3p	hsa-miR-23a-3p/hsa-miR-23b-3p	hsa-miR-27a-3p
SERPINE1	0.00531703	0.23141	0.27	5	hsa-miR-143-3p	hsa-miR-148a-3p	hsa-miR-181c-5p	hsa-miR-199a-5p	hsa-miR-342-3p
SPIRE1	0.00531703	0.23141	0.27	5	hsa-let-7a-5p/hsa-let-7e-5p/hsa-let-7f-5p/hsa-let-7g-5p/hsa-miR-98-5p	hsa-miR-148a-3p	hsa-miR-181c-5p	hsa-miR-301a-3p	hsa-miR-532-5p
UBL3	0.00531703	0.23141	0.27	5	hsa-miR-103a-3p/hsa-miR-107	hsa-miR-142-5p	hsa-miR-15b-5p/hsa-miR-15b-5p	hsa-miR-199a-5p	hsa-miR-23a-3p/hsa-miR-23b-3p
ZHX1	0.00531703	0.23141	0.27	5	hsa-miR-103a-3p/hsa-miR-107	hsa-miR-133b	hsa-miR-15b-5p/hsa-miR-15b-5p	hsa-miR-23a-3p/hsa-miR-23b-3p	hsa-miR-27a-3p
ARPP19	0.0054093	0.23141	0.422727	9	hsa-let-7a-5p/hsa-let-7e-5p/hsa-let-7f-5p/hsa-let-7g-5p/hsa-miR-98-5p	hsa-miR-142-5p	hsa-miR-148a-3p	hsa-miR-15b-5p/hsa-miR-15b-5p	hsa-miR-23a-3p/hsa-miR-23b-3p	hsa-miR-26a-5p/hsa-miR-26b-5p	hsa-miR-27a-3p	hsa-miR-29b-3p	hsa-miR-532-5p
CPD	0.0054093	0.23141	0.422727	9	hsa-let-7a-5p/hsa-let-7e-5p/hsa-let-7f-5p/hsa-let-7g-5p/hsa-miR-98-5p	hsa-miR-143-3p	hsa-miR-148a-3p	hsa-miR-15b-5p/hsa-miR-15b-5p	hsa-miR-181c-5p	hsa-miR-200a-3p	hsa-miR-23a-3p/hsa-miR-23b-3p	hsa-miR-27a-3p	hsa-miR-532-5p
RBM24	0.0054093	0.23141	0.422727	9	hsa-miR-103a-3p/hsa-miR-107	hsa-miR-142-5p	hsa-miR-143-3p	hsa-miR-148a-3p	hsa-miR-15b-5p/hsa-miR-15b-5p	hsa-miR-199a-5p	hsa-miR-200a-3p	hsa-miR-221-3p	hsa-miR-26a-5p/hsa-miR-26b-5p
PURA	0.00552659	0.23141	0.479752	11	hsa-miR-103a-3p/hsa-miR-107	hsa-miR-142-5p	hsa-miR-154-3p	hsa-miR-15b-5p/hsa-miR-15b-5p	hsa-miR-199a-5p	hsa-miR-221-3p	hsa-miR-23a-3p/hsa-miR-23b-3p	hsa-miR-26a-5p/hsa-miR-26b-5p	hsa-miR-27a-3p	hsa-miR-29b-3p	hsa-miR-532-5p
DYNLL2	0.0056439	0.23141	0.454091	10	hsa-miR-103a-3p/hsa-miR-107	hsa-miR-132-3p/hsa-miR-212-3p	hsa-miR-143-3p	hsa-miR-148a-3p	hsa-miR-15b-5p/hsa-miR-15b-5p	hsa-miR-181c-5p	hsa-miR-193a-3p/hsa-miR-193b-3p	hsa-miR-200a-3p	hsa-miR-27a-3p	hsa-miR-301a-3p
MIER3	0.0056439	0.23141	0.454091	10	hsa-miR-133b	hsa-miR-142-5p	hsa-miR-181c-5p	hsa-miR-199a-5p	hsa-miR-200a-3p	hsa-miR-221-3p	hsa-miR-26a-5p/hsa-miR-26b-5p	hsa-miR-27a-3p	hsa-miR-29b-3p	hsa-miR-301a-3p
ADAMTS19	0.00612925	0.23141	0.163636	3	hsa-miR-148a-3p	hsa-miR-26a-5p/hsa-miR-26b-5p	hsa-miR-301a-3p
CD163	0.00612925	0.23141	0.163636	3	hsa-miR-15b-5p/hsa-miR-15b-5p	hsa-miR-181c-5p	hsa-miR-23a-3p/hsa-miR-23b-3p
CEBPD	0.00612925	0.23141	0.163636	3	hsa-let-7a-5p/hsa-let-7e-5p/hsa-let-7f-5p/hsa-let-7g-5p/hsa-miR-98-5p	hsa-miR-142-5p	hsa-miR-22-3p
COL5A2	0.00612925	0.23141	0.163636	3	hsa-let-7a-5p/hsa-let-7e-5p/hsa-let-7f-5p/hsa-let-7g-5p/hsa-miR-98-5p	hsa-miR-143-3p	hsa-miR-29b-3p
FBXL18	0.00612925	0.23141	0.163636	3	hsa-miR-103a-3p/hsa-miR-107	hsa-miR-29b-3p	hsa-miR-338-3p
GEMIN5	0.00612925	0.23141	0.163636	3	hsa-miR-143-3p	hsa-miR-200a-3p	hsa-miR-433-3p
MATN1	0.00612925	0.23141	0.163636	3	hsa-miR-23a-3p/hsa-miR-23b-3p	hsa-miR-27a-3p	hsa-miR-342-3p
NDP	0.00612925	0.23141	0.163636	3	hsa-miR-148a-3p	hsa-miR-15b-5p/hsa-miR-15b-5p	hsa-miR-532-5p
NPEPL1	0.00612925	0.23141	0.163636	3	hsa-let-7a-5p/hsa-let-7e-5p/hsa-let-7f-5p/hsa-let-7g-5p/hsa-miR-98-5p	hsa-miR-148a-3p	hsa-miR-301a-3p
PRNP	0.00612925	0.23141	0.163636	3	hsa-miR-142-5p	hsa-miR-148a-3p	hsa-miR-301a-3p
RCN1	0.00612925	0.23141	0.163636	3	hsa-let-7a-5p/hsa-let-7e-5p/hsa-let-7f-5p/hsa-let-7g-5p/hsa-miR-98-5p	hsa-miR-23a-3p/hsa-miR-23b-3p	hsa-miR-26a-5p/hsa-miR-26b-5p
RP11-480I12.4	0.00612925	0.23141	0.163636	3	hsa-let-7a-5p/hsa-let-7e-5p/hsa-let-7f-5p/hsa-let-7g-5p/hsa-miR-98-5p	hsa-miR-342-3p	hsa-miR-532-5p
RPL14	0.00612925	0.23141	0.163636	3	hsa-miR-15b-5p/hsa-miR-15b-5p	hsa-miR-22-3p	hsa-miR-532-5p
RPN2	0.00612925	0.23141	0.163636	3	hsa-miR-142-5p	hsa-miR-181c-5p	hsa-miR-27a-3p
SLC10A6	0.00612925	0.23141	0.163636	3	hsa-let-7a-5p/hsa-let-7e-5p/hsa-let-7f-5p/hsa-let-7g-5p/hsa-miR-98-5p	hsa-miR-193a-3p/hsa-miR-193b-3p	hsa-miR-342-3p
SNX3	0.00612925	0.23141	0.163636	3	hsa-miR-103a-3p/hsa-miR-107	hsa-miR-142-5p	hsa-miR-148a-3p
STARD9	0.00612925	0.23141	0.163636	3	hsa-let-7a-5p/hsa-let-7e-5p/hsa-let-7f-5p/hsa-let-7g-5p/hsa-miR-98-5p	hsa-miR-15b-5p/hsa-miR-15b-5p	hsa-miR-29b-3p
TRMT112	0.00612925	0.23141	0.163636	3	hsa-miR-103a-3p/hsa-miR-107	hsa-miR-15b-5p/hsa-miR-15b-5p	hsa-miR-338-3p
UBE4B	0.00612925	0.23141	0.163636	3	hsa-miR-148a-3p	hsa-miR-15b-5p/hsa-miR-15b-5p	hsa-miR-26a-5p/hsa-miR-26b-5p
ZNF397	0.00612925	0.23141	0.163636	3	hsa-miR-15b-5p/hsa-miR-15b-5p	hsa-miR-181c-5p	hsa-miR-433-3p
FBXW7	0.00624376	0.23141	0.398864	8	hsa-miR-103a-3p/hsa-miR-107	hsa-miR-132-3p/hsa-miR-212-3p	hsa-miR-15b-5p/hsa-miR-15b-5p	hsa-miR-22-3p	hsa-miR-27a-3p	hsa-miR-29b-3p	hsa-miR-338-3p	hsa-miR-433-3p
INO80	0.00624376	0.23141	0.398864	8	hsa-miR-143-3p	hsa-miR-148a-3p	hsa-miR-181c-5p	hsa-miR-193a-3p/hsa-miR-193b-3p	hsa-miR-27a-3p	hsa-miR-301a-3p	hsa-miR-342-3p	hsa-miR-433-3p
TMEM135	0.00624376	0.23141	0.398864	8	hsa-let-7a-5p/hsa-let-7e-5p/hsa-let-7f-5p/hsa-let-7g-5p/hsa-miR-98-5p	hsa-miR-143-3p	hsa-miR-15b-5p/hsa-miR-15b-5p	hsa-miR-181c-5p	hsa-miR-199a-5p	hsa-miR-200a-3p	hsa-miR-23a-3p/hsa-miR-23b-3p	hsa-miR-26a-5p/hsa-miR-26b-5p
ATXN1	0.00626316	0.23141	0.511364	12	hsa-miR-103a-3p/hsa-miR-107	hsa-miR-132-3p/hsa-miR-212-3p	hsa-miR-142-5p	hsa-miR-148a-3p	hsa-miR-181c-5p	hsa-miR-193a-3p/hsa-miR-193b-3p	hsa-miR-200a-3p	hsa-miR-221-3p	hsa-miR-23a-3p/hsa-miR-23b-3p	hsa-miR-29b-3p	hsa-miR-301a-3p	hsa-miR-502-3p
CECR6	0.00664218	0.23141	0.327273	6	hsa-let-7a-5p/hsa-let-7e-5p/hsa-let-7f-5p/hsa-let-7g-5p/hsa-miR-98-5p	hsa-miR-103a-3p/hsa-miR-107	hsa-miR-133b	hsa-miR-148a-3p	hsa-miR-15b-5p/hsa-miR-15b-5p	hsa-miR-27a-3p
CSF1	0.00664218	0.23141	0.327273	6	hsa-miR-148a-3p	hsa-miR-15b-5p/hsa-miR-15b-5p	hsa-miR-27a-3p	hsa-miR-301a-3p	hsa-miR-342-3p	hsa-miR-532-5p
CSNK1G3	0.00664218	0.23141	0.327273	6	hsa-miR-103a-3p/hsa-miR-107	hsa-miR-133b	hsa-miR-143-3p	hsa-miR-181c-5p	hsa-miR-200a-3p	hsa-miR-23a-3p/hsa-miR-23b-3p
EPS15	0.00664218	0.23141	0.327273	6	hsa-miR-133b	hsa-miR-148a-3p	hsa-miR-23a-3p/hsa-miR-23b-3p	hsa-miR-26a-5p/hsa-miR-26b-5p	hsa-miR-29b-3p	hsa-miR-301a-3p
MAP4K4	0.00664218	0.23141	0.327273	6	hsa-let-7a-5p/hsa-let-7e-5p/hsa-let-7f-5p/hsa-let-7g-5p/hsa-miR-98-5p	hsa-miR-181c-5p	hsa-miR-200a-3p	hsa-miR-23a-3p/hsa-miR-23b-3p	hsa-miR-29b-3p	hsa-miR-301a-3p
POU3F2	0.00664218	0.23141	0.327273	6	hsa-miR-103a-3p/hsa-miR-107	hsa-miR-148a-3p	hsa-miR-15b-5p/hsa-miR-15b-5p	hsa-miR-200a-3p	hsa-miR-27a-3p	hsa-miR-301a-3p
ZNF275	0.00664218	0.23141	0.327273	6	hsa-let-7a-5p/hsa-let-7e-5p/hsa-let-7f-5p/hsa-let-7g-5p/hsa-miR-98-5p	hsa-miR-142-5p	hsa-miR-143-3p	hsa-miR-15b-5p/hsa-miR-15b-5p	hsa-miR-26a-5p/hsa-miR-26b-5p	hsa-miR-301a-3p
ANKIB1	0.00677258	0.23141	0.368182	7	hsa-miR-103a-3p/hsa-miR-107	hsa-miR-142-5p	hsa-miR-15b-5p/hsa-miR-15b-5p	hsa-miR-221-3p	hsa-miR-26a-5p/hsa-miR-26b-5p	hsa-miR-27a-3p	hsa-miR-301a-3p
DPYSL3	0.00677258	0.23141	0.368182	7	hsa-let-7a-5p/hsa-let-7e-5p/hsa-let-7f-5p/hsa-let-7g-5p/hsa-miR-98-5p	hsa-miR-103a-3p/hsa-miR-107	hsa-miR-132-3p/hsa-miR-212-3p	hsa-miR-200a-3p	hsa-miR-22-3p	hsa-miR-29b-3p	hsa-miR-433-3p
DUSP16	0.00677258	0.23141	0.368182	7	hsa-let-7a-5p/hsa-let-7e-5p/hsa-let-7f-5p/hsa-let-7g-5p/hsa-miR-98-5p	hsa-miR-148a-3p	hsa-miR-22-3p	hsa-miR-27a-3p	hsa-miR-338-3p	hsa-miR-342-3p	hsa-miR-433-3p
FAM73B	0.00677258	0.23141	0.368182	7	hsa-miR-143-3p	hsa-miR-148a-3p	hsa-miR-15b-5p/hsa-miR-15b-5p	hsa-miR-181c-5p	hsa-miR-29b-3p	hsa-miR-301a-3p	hsa-miR-338-3p
GAREM	0.00677258	0.23141	0.368182	7	hsa-let-7a-5p/hsa-let-7e-5p/hsa-let-7f-5p/hsa-let-7g-5p/hsa-miR-98-5p	hsa-miR-154-3p	hsa-miR-15b-5p/hsa-miR-15b-5p	hsa-miR-27a-3p	hsa-miR-301a-3p	hsa-miR-433-3p	hsa-miR-532-5p
HMGA2	0.00677258	0.23141	0.368182	7	hsa-let-7a-5p/hsa-let-7e-5p/hsa-let-7f-5p/hsa-let-7g-5p/hsa-miR-98-5p	hsa-miR-103a-3p/hsa-miR-107	hsa-miR-132-3p/hsa-miR-212-3p	hsa-miR-148a-3p	hsa-miR-15b-5p/hsa-miR-15b-5p	hsa-miR-23a-3p/hsa-miR-23b-3p	hsa-miR-26a-5p/hsa-miR-26b-5p
MIB1	0.00677258	0.23141	0.368182	7	hsa-let-7a-5p/hsa-let-7e-5p/hsa-let-7f-5p/hsa-let-7g-5p/hsa-miR-98-5p	hsa-miR-103a-3p/hsa-miR-107	hsa-miR-15b-5p/hsa-miR-15b-5p	hsa-miR-200a-3p	hsa-miR-26a-5p/hsa-miR-26b-5p	hsa-miR-29b-3p	hsa-miR-301a-3p
SNRK	0.00677258	0.23141	0.368182	7	hsa-miR-103a-3p/hsa-miR-107	hsa-miR-133b	hsa-miR-148a-3p	hsa-miR-15b-5p/hsa-miR-15b-5p	hsa-miR-200a-3p	hsa-miR-22-3p	hsa-miR-29b-3p
TBPL1	0.00677258	0.23141	0.368182	7	hsa-miR-103a-3p/hsa-miR-107	hsa-miR-133b	hsa-miR-148a-3p	hsa-miR-15b-5p/hsa-miR-15b-5p	hsa-miR-181c-5p	hsa-miR-27a-3p	hsa-miR-301a-3p
THSD7A	0.00677258	0.23141	0.368182	7	hsa-miR-103a-3p/hsa-miR-107	hsa-miR-200a-3p	hsa-miR-22-3p	hsa-miR-23a-3p/hsa-miR-23b-3p	hsa-miR-26a-5p/hsa-miR-26b-5p	hsa-miR-301a-3p	hsa-miR-338-3p
ZKSCAN1	0.00677258	0.23141	0.368182	7	hsa-miR-103a-3p/hsa-miR-107	hsa-miR-15b-5p/hsa-miR-15b-5p	hsa-miR-181c-5p	hsa-miR-200a-3p	hsa-miR-23a-3p/hsa-miR-23b-3p	hsa-miR-26a-5p/hsa-miR-26b-5p	hsa-miR-532-5p
TANC2	0.00678311	0.23141	0.490909	11	hsa-miR-142-5p	hsa-miR-143-3p	hsa-miR-181c-5p	hsa-miR-193a-3p/hsa-miR-193b-3p	hsa-miR-199a-5p	hsa-miR-200a-3p	hsa-miR-23a-3p/hsa-miR-23b-3p	hsa-miR-26a-5p/hsa-miR-26b-5p	hsa-miR-301a-3p	hsa-miR-338-3p	hsa-miR-342-3p
HELZ	0.00690435	0.232446	0.436364	9	hsa-let-7a-5p/hsa-let-7e-5p/hsa-let-7f-5p/hsa-let-7g-5p/hsa-miR-98-5p	hsa-miR-103a-3p/hsa-miR-107	hsa-miR-15b-5p/hsa-miR-15b-5p	hsa-miR-193a-3p/hsa-miR-193b-3p	hsa-miR-23a-3p/hsa-miR-23b-3p	hsa-miR-26a-5p/hsa-miR-26b-5p	hsa-miR-29b-3p	hsa-miR-338-3p	hsa-miR-532-5p
TNRC6C	0.00690435	0.232446	0.436364	9	hsa-miR-142-5p	hsa-miR-143-3p	hsa-miR-148a-3p	hsa-miR-200a-3p	hsa-miR-221-3p	hsa-miR-23a-3p/hsa-miR-23b-3p	hsa-miR-26a-5p/hsa-miR-26b-5p	hsa-miR-301a-3p	hsa-miR-433-3p
ZBTB18	0.00690435	0.232446	0.436364	9	hsa-miR-132-3p/hsa-miR-212-3p	hsa-miR-148a-3p	hsa-miR-199a-5p	hsa-miR-200a-3p	hsa-miR-23a-3p/hsa-miR-23b-3p	hsa-miR-26a-5p/hsa-miR-26b-5p	hsa-miR-27a-3p	hsa-miR-301a-3p	hsa-miR-338-3p
DYRK2	0.00755241	0.253154	0.521591	12	hsa-let-7a-5p/hsa-let-7e-5p/hsa-let-7f-5p/hsa-let-7g-5p/hsa-miR-98-5p	hsa-miR-103a-3p/hsa-miR-107	hsa-miR-132-3p/hsa-miR-212-3p	hsa-miR-148a-3p	hsa-miR-154-3p	hsa-miR-15b-5p/hsa-miR-15b-5p	hsa-miR-181c-5p	hsa-miR-193a-3p/hsa-miR-193b-3p	hsa-miR-200a-3p	hsa-miR-23a-3p/hsa-miR-23b-3p	hsa-miR-301a-3p	hsa-miR-342-3p
TNRC6B	0.00795511	0.259331	0.547552	13	hsa-miR-103a-3p/hsa-miR-107	hsa-miR-133b	hsa-miR-148a-3p	hsa-miR-15b-5p/hsa-miR-15b-5p	hsa-miR-181c-5p	hsa-miR-200a-3p	hsa-miR-22-3p	hsa-miR-23a-3p/hsa-miR-23b-3p	hsa-miR-26a-5p/hsa-miR-26b-5p	hsa-miR-29b-3p	hsa-miR-301a-3p	hsa-miR-338-3p	hsa-miR-433-3p
FBXL20	0.0081273	0.259331	0.414205	8	hsa-miR-103a-3p/hsa-miR-107	hsa-miR-132-3p/hsa-miR-212-3p	hsa-miR-15b-5p/hsa-miR-15b-5p	hsa-miR-200a-3p	hsa-miR-26a-5p/hsa-miR-26b-5p	hsa-miR-27a-3p	hsa-miR-29b-3p	hsa-miR-342-3p
ARNT	0.00833271	0.259331	0.294545	5	hsa-miR-103a-3p/hsa-miR-107	hsa-miR-193a-3p/hsa-miR-193b-3p	hsa-miR-221-3p	hsa-miR-23a-3p/hsa-miR-23b-3p	hsa-miR-29b-3p
ASIC1	0.00833271	0.259331	0.294545	5	hsa-miR-103a-3p/hsa-miR-107	hsa-miR-154-3p	hsa-miR-181c-5p	hsa-miR-27a-3p	hsa-miR-29b-3p
CCND1	0.00833271	0.259331	0.294545	5	hsa-let-7a-5p/hsa-let-7e-5p/hsa-let-7f-5p/hsa-let-7g-5p/hsa-miR-98-5p	hsa-miR-142-5p	hsa-miR-15b-5p/hsa-miR-15b-5p	hsa-miR-193a-3p/hsa-miR-193b-3p	hsa-miR-23a-3p/hsa-miR-23b-3p
COL1A1	0.00833271	0.259331	0.294545	5	hsa-let-7a-5p/hsa-let-7e-5p/hsa-let-7f-5p/hsa-let-7g-5p/hsa-miR-98-5p	hsa-miR-133b	hsa-miR-143-3p	hsa-miR-29b-3p	hsa-miR-338-3p
FBXO10	0.00833271	0.259331	0.294545	5	hsa-miR-103a-3p/hsa-miR-107	hsa-miR-15b-5p/hsa-miR-15b-5p	hsa-miR-23a-3p/hsa-miR-23b-3p	hsa-miR-27a-3p	hsa-miR-301a-3p
GCNT2	0.00833271	0.259331	0.294545	5	hsa-miR-181c-5p	hsa-miR-199a-5p	hsa-miR-200a-3p	hsa-miR-23a-3p/hsa-miR-23b-3p	hsa-miR-27a-3p
SLC35G1	0.00833271	0.259331	0.294545	5	hsa-miR-103a-3p/hsa-miR-107	hsa-miR-15b-5p/hsa-miR-15b-5p	hsa-miR-181c-5p	hsa-miR-26a-5p/hsa-miR-26b-5p	hsa-miR-338-3p
SNX6	0.00833271	0.259331	0.294545	5	hsa-let-7a-5p/hsa-let-7e-5p/hsa-let-7f-5p/hsa-let-7g-5p/hsa-miR-98-5p	hsa-miR-142-5p	hsa-miR-154-3p	hsa-miR-199a-5p	hsa-miR-23a-3p/hsa-miR-23b-3p
SOWAHC	0.00833271	0.259331	0.294545	5	hsa-miR-103a-3p/hsa-miR-107	hsa-miR-142-5p	hsa-miR-15b-5p/hsa-miR-15b-5p	hsa-miR-23a-3p/hsa-miR-23b-3p	hsa-miR-29b-3p
ZIC5	0.00833271	0.259331	0.294545	5	hsa-miR-23a-3p/hsa-miR-23b-3p	hsa-miR-26a-5p/hsa-miR-26b-5p	hsa-miR-27a-3p	hsa-miR-29b-3p	hsa-miR-301a-3p
ZNF362	0.00833271	0.259331	0.294545	5	hsa-let-7a-5p/hsa-let-7e-5p/hsa-let-7f-5p/hsa-let-7g-5p/hsa-miR-98-5p	hsa-miR-133b	hsa-miR-15b-5p/hsa-miR-15b-5p	hsa-miR-191-5p	hsa-miR-29b-3p
ABL2	0.00869394	0.259331	0.478636	10	hsa-let-7a-5p/hsa-let-7e-5p/hsa-let-7f-5p/hsa-let-7g-5p/hsa-miR-98-5p	hsa-miR-103a-3p/hsa-miR-107	hsa-miR-133b	hsa-miR-143-3p	hsa-miR-148a-3p	hsa-miR-15b-5p/hsa-miR-15b-5p	hsa-miR-200a-3p	hsa-miR-23a-3p/hsa-miR-23b-3p	hsa-miR-26a-5p/hsa-miR-26b-5p	hsa-miR-27a-3p
HLF	0.00870688	0.259331	0.45	9	hsa-let-7a-5p/hsa-let-7e-5p/hsa-let-7f-5p/hsa-let-7g-5p/hsa-miR-98-5p	hsa-miR-103a-3p/hsa-miR-107	hsa-miR-133b	hsa-miR-148a-3p	hsa-miR-181c-5p	hsa-miR-199a-5p	hsa-miR-200a-3p	hsa-miR-29b-3p	hsa-miR-301a-3p
ARHGEF26	0.00906107	0.259331	0.245455	4	hsa-miR-22-3p	hsa-miR-26a-5p/hsa-miR-26b-5p	hsa-miR-27a-3p	hsa-miR-301a-3p
ATP6V1A	0.00906107	0.259331	0.245455	4	hsa-miR-143-3p	hsa-miR-200a-3p	hsa-miR-27a-3p	hsa-miR-29b-3p
B4GALNT3	0.00906107	0.259331	0.245455	4	hsa-miR-15b-5p/hsa-miR-15b-5p	hsa-miR-193a-3p/hsa-miR-193b-3p	hsa-miR-301a-3p	hsa-miR-502-3p
C17orf96	0.00906107	0.259331	0.245455	4	hsa-miR-127-3p	hsa-miR-133b	hsa-miR-22-3p	hsa-miR-27a-3p
DLL1	0.00906107	0.259331	0.245455	4	hsa-miR-103a-3p/hsa-miR-107	hsa-miR-148a-3p	hsa-miR-15b-5p/hsa-miR-15b-5p	hsa-miR-301a-3p
FAM13B	0.00906107	0.259331	0.245455	4	hsa-miR-103a-3p/hsa-miR-107	hsa-miR-181c-5p	hsa-miR-29b-3p	hsa-miR-301a-3p
GAP43	0.00906107	0.259331	0.245455	4	hsa-miR-148a-3p	hsa-miR-191-5p	hsa-miR-23a-3p/hsa-miR-23b-3p	hsa-miR-301a-3p
GPR174	0.00906107	0.259331	0.245455	4	hsa-miR-15b-5p/hsa-miR-15b-5p	hsa-miR-200a-3p	hsa-miR-27a-3p	hsa-miR-301a-3p
HEPHL1	0.00906107	0.259331	0.245455	4	hsa-miR-15b-5p/hsa-miR-15b-5p	hsa-miR-181c-5p	hsa-miR-23a-3p/hsa-miR-23b-3p	hsa-miR-26a-5p/hsa-miR-26b-5p
N4BP2L1	0.00906107	0.259331	0.245455	4	hsa-miR-143-3p	hsa-miR-23a-3p/hsa-miR-23b-3p	hsa-miR-29b-3p	hsa-miR-338-3p
NAA20	0.00906107	0.259331	0.245455	4	hsa-let-7a-5p/hsa-let-7e-5p/hsa-let-7f-5p/hsa-let-7g-5p/hsa-miR-98-5p	hsa-miR-103a-3p/hsa-miR-107	hsa-miR-181c-5p	hsa-miR-22-3p
OSBPL11	0.00906107	0.259331	0.245455	4	hsa-miR-148a-3p	hsa-miR-200a-3p	hsa-miR-26a-5p/hsa-miR-26b-5p	hsa-miR-27a-3p
OSTF1	0.00906107	0.259331	0.245455	4	hsa-let-7a-5p/hsa-let-7e-5p/hsa-let-7f-5p/hsa-let-7g-5p/hsa-miR-98-5p	hsa-miR-142-5p	hsa-miR-148a-3p	hsa-miR-301a-3p
PAQR9	0.00906107	0.259331	0.245455	4	hsa-miR-148a-3p	hsa-miR-200a-3p	hsa-miR-23a-3p/hsa-miR-23b-3p	hsa-miR-27a-3p
PPIF	0.00906107	0.259331	0.245455	4	hsa-miR-15b-5p/hsa-miR-15b-5p	hsa-miR-193a-3p/hsa-miR-193b-3p	hsa-miR-23a-3p/hsa-miR-23b-3p	hsa-miR-27a-3p
RB1	0.00906107	0.259331	0.245455	4	hsa-let-7a-5p/hsa-let-7e-5p/hsa-let-7f-5p/hsa-let-7g-5p/hsa-miR-98-5p	hsa-miR-132-3p/hsa-miR-212-3p	hsa-miR-199a-5p	hsa-miR-26a-5p/hsa-miR-26b-5p
SVEP1	0.00906107	0.259331	0.245455	4	hsa-miR-103a-3p/hsa-miR-107	hsa-miR-143-3p	hsa-miR-15b-5p/hsa-miR-15b-5p	hsa-miR-29b-3p
WNT1	0.00906107	0.259331	0.245455	4	hsa-let-7a-5p/hsa-let-7e-5p/hsa-let-7f-5p/hsa-let-7g-5p/hsa-miR-98-5p	hsa-miR-148a-3p	hsa-miR-22-3p	hsa-miR-301a-3p
AMOT	0.00908807	0.259331	0.385714	7	hsa-let-7a-5p/hsa-let-7e-5p/hsa-let-7f-5p/hsa-let-7g-5p/hsa-miR-98-5p	hsa-miR-103a-3p/hsa-miR-107	hsa-miR-132-3p/hsa-miR-212-3p	hsa-miR-15b-5p/hsa-miR-15b-5p	hsa-miR-22-3p	hsa-miR-26a-5p/hsa-miR-26b-5p	hsa-miR-29b-3p
BTG2	0.00908807	0.259331	0.385714	7	hsa-let-7a-5p/hsa-let-7e-5p/hsa-let-7f-5p/hsa-let-7g-5p/hsa-miR-98-5p	hsa-miR-103a-3p/hsa-miR-107	hsa-miR-132-3p/hsa-miR-212-3p	hsa-miR-15b-5p/hsa-miR-15b-5p	hsa-miR-181c-5p	hsa-miR-27a-3p	hsa-miR-29b-3p
CALU	0.00908807	0.259331	0.385714	7	hsa-let-7a-5p/hsa-let-7e-5p/hsa-let-7f-5p/hsa-let-7g-5p/hsa-miR-98-5p	hsa-miR-103a-3p/hsa-miR-107	hsa-miR-132-3p/hsa-miR-212-3p	hsa-miR-154-3p	hsa-miR-15b-5p/hsa-miR-15b-5p	hsa-miR-200a-3p	hsa-miR-29b-3p
FNIP2	0.00908807	0.259331	0.385714	7	hsa-let-7a-5p/hsa-let-7e-5p/hsa-let-7f-5p/hsa-let-7g-5p/hsa-miR-98-5p	hsa-miR-15b-5p/hsa-miR-15b-5p	hsa-miR-181c-5p	hsa-miR-200a-3p	hsa-miR-221-3p	hsa-miR-23a-3p/hsa-miR-23b-3p	hsa-miR-502-3p
MAPK8	0.00908807	0.259331	0.385714	7	hsa-let-7a-5p/hsa-let-7e-5p/hsa-let-7f-5p/hsa-let-7g-5p/hsa-miR-98-5p	hsa-miR-103a-3p/hsa-miR-107	hsa-miR-15b-5p/hsa-miR-15b-5p	hsa-miR-181c-5p	hsa-miR-199a-5p	hsa-miR-29b-3p	hsa-miR-433-3p
PITPNM2	0.00908807	0.259331	0.385714	7	hsa-miR-133b	hsa-miR-148a-3p	hsa-miR-191-5p	hsa-miR-221-3p	hsa-miR-27a-3p	hsa-miR-29b-3p	hsa-miR-301a-3p
SLC7A11	0.00908807	0.259331	0.385714	7	hsa-miR-142-5p	hsa-miR-143-3p	hsa-miR-148a-3p	hsa-miR-181c-5p	hsa-miR-26a-5p/hsa-miR-26b-5p	hsa-miR-27a-3p	hsa-miR-532-5p
GPD2	0.00938529	0.26102	0.347727	6	hsa-miR-132-3p/hsa-miR-212-3p	hsa-miR-143-3p	hsa-miR-181c-5p	hsa-miR-199a-5p	hsa-miR-27a-3p	hsa-miR-338-3p
KCNA4	0.00938529	0.26102	0.347727	6	hsa-miR-142-5p	hsa-miR-181c-5p	hsa-miR-27a-3p	hsa-miR-301a-3p	hsa-miR-338-3p	hsa-miR-342-3p
KIAA1958	0.00938529	0.26102	0.347727	6	hsa-let-7a-5p/hsa-let-7e-5p/hsa-let-7f-5p/hsa-let-7g-5p/hsa-miR-98-5p	hsa-miR-103a-3p/hsa-miR-107	hsa-miR-132-3p/hsa-miR-212-3p	hsa-miR-199a-5p	hsa-miR-200a-3p	hsa-miR-23a-3p/hsa-miR-23b-3p
MYCN	0.00938529	0.26102	0.347727	6	hsa-let-7a-5p/hsa-let-7e-5p/hsa-let-7f-5p/hsa-let-7g-5p/hsa-miR-98-5p	hsa-miR-103a-3p/hsa-miR-107	hsa-miR-142-5p	hsa-miR-193a-3p/hsa-miR-193b-3p	hsa-miR-29b-3p	hsa-miR-502-3p
SPRY4	0.00938529	0.26102	0.347727	6	hsa-miR-133b	hsa-miR-15b-5p/hsa-miR-15b-5p	hsa-miR-181c-5p	hsa-miR-200a-3p	hsa-miR-29b-3p	hsa-miR-301a-3p
UGCG	0.00938529	0.26102	0.347727	6	hsa-let-7a-5p/hsa-let-7e-5p/hsa-let-7f-5p/hsa-let-7g-5p/hsa-miR-98-5p	hsa-miR-148a-3p	hsa-miR-181c-5p	hsa-miR-22-3p	hsa-miR-27a-3p	hsa-miR-301a-3p
ZBTB5	0.00938529	0.26102	0.347727	6	hsa-let-7a-5p/hsa-let-7e-5p/hsa-let-7f-5p/hsa-let-7g-5p/hsa-miR-98-5p	hsa-miR-193a-3p/hsa-miR-193b-3p	hsa-miR-199a-5p	hsa-miR-29b-3p	hsa-miR-338-3p	hsa-miR-342-3p
BHLHE41	0.0104198	0.26825	0.429545	8	hsa-miR-133b	hsa-miR-142-5p	hsa-miR-148a-3p	hsa-miR-15b-5p/hsa-miR-15b-5p	hsa-miR-27a-3p	hsa-miR-301a-3p	hsa-miR-342-3p	hsa-miR-502-3p
CEP85L	0.0104198	0.26825	0.429545	8	hsa-let-7a-5p/hsa-let-7e-5p/hsa-let-7f-5p/hsa-let-7g-5p/hsa-miR-98-5p	hsa-miR-103a-3p/hsa-miR-107	hsa-miR-133b	hsa-miR-15b-5p/hsa-miR-15b-5p	hsa-miR-199a-5p	hsa-miR-23a-3p/hsa-miR-23b-3p	hsa-miR-27a-3p	hsa-miR-29b-3p
ST8SIA4	0.0104198	0.26825	0.429545	8	hsa-miR-103a-3p/hsa-miR-107	hsa-miR-142-5p	hsa-miR-143-3p	hsa-miR-181c-5p	hsa-miR-22-3p	hsa-miR-26a-5p/hsa-miR-26b-5p	hsa-miR-27a-3p	hsa-miR-433-3p
VAPB	0.0104198	0.26825	0.429545	8	hsa-miR-133b	hsa-miR-143-3p	hsa-miR-154-3p	hsa-miR-15b-5p/hsa-miR-15b-5p	hsa-miR-221-3p	hsa-miR-23a-3p/hsa-miR-23b-3p	hsa-miR-27a-3p	hsa-miR-29b-3p
MBD5	0.0106446	0.26825	0.490909	10	hsa-miR-142-5p	hsa-miR-154-3p	hsa-miR-199a-5p	hsa-miR-200a-3p	hsa-miR-221-3p	hsa-miR-23a-3p/hsa-miR-23b-3p	hsa-miR-27a-3p	hsa-miR-29b-3p	hsa-miR-338-3p	hsa-miR-532-5p
PTPRD	0.0106446	0.26825	0.490909	10	hsa-let-7a-5p/hsa-let-7e-5p/hsa-let-7f-5p/hsa-let-7g-5p/hsa-miR-98-5p	hsa-miR-132-3p/hsa-miR-212-3p	hsa-miR-133b	hsa-miR-142-5p	hsa-miR-148a-3p	hsa-miR-15b-5p/hsa-miR-15b-5p	hsa-miR-200a-3p	hsa-miR-26a-5p/hsa-miR-26b-5p	hsa-miR-29b-3p	hsa-miR-301a-3p
PDE3B	0.0108572	0.26825	0.463636	9	hsa-miR-103a-3p/hsa-miR-107	hsa-miR-143-3p	hsa-miR-15b-5p/hsa-miR-15b-5p	hsa-miR-23a-3p/hsa-miR-23b-3p	hsa-miR-26a-5p/hsa-miR-26b-5p	hsa-miR-27a-3p	hsa-miR-301a-3p	hsa-miR-342-3p	hsa-miR-502-3p
SBNO1	0.0108572	0.26825	0.463636	9	hsa-let-7a-5p/hsa-let-7e-5p/hsa-let-7f-5p/hsa-let-7g-5p/hsa-miR-98-5p	hsa-miR-103a-3p/hsa-miR-107	hsa-miR-148a-3p	hsa-miR-15b-5p/hsa-miR-15b-5p	hsa-miR-181c-5p	hsa-miR-23a-3p/hsa-miR-23b-3p	hsa-miR-26a-5p/hsa-miR-26b-5p	hsa-miR-301a-3p	hsa-miR-502-3p
MAF	0.0119503	0.26825	0.403247	7	hsa-miR-132-3p/hsa-miR-212-3p	hsa-miR-142-5p	hsa-miR-143-3p	hsa-miR-148a-3p	hsa-miR-23a-3p/hsa-miR-23b-3p	hsa-miR-301a-3p	hsa-miR-338-3p
PHACTR2	0.0119503	0.26825	0.403247	7	hsa-let-7a-5p/hsa-let-7e-5p/hsa-let-7f-5p/hsa-let-7g-5p/hsa-miR-98-5p	hsa-miR-148a-3p	hsa-miR-15b-5p/hsa-miR-15b-5p	hsa-miR-181c-5p	hsa-miR-23a-3p/hsa-miR-23b-3p	hsa-miR-29b-3p	hsa-miR-301a-3p
RMND5A	0.0119503	0.26825	0.403247	7	hsa-miR-143-3p	hsa-miR-148a-3p	hsa-miR-181c-5p	hsa-miR-27a-3p	hsa-miR-29b-3p	hsa-miR-301a-3p	hsa-miR-342-3p
TGIF2	0.0119503	0.26825	0.403247	7	hsa-miR-103a-3p/hsa-miR-107	hsa-miR-143-3p	hsa-miR-148a-3p	hsa-miR-15b-5p/hsa-miR-15b-5p	hsa-miR-181c-5p	hsa-miR-27a-3p	hsa-miR-29b-3p
ABHD5	0.0123778	0.26825	0.319091	5	hsa-miR-132-3p/hsa-miR-212-3p	hsa-miR-142-5p	hsa-miR-26a-5p/hsa-miR-26b-5p	hsa-miR-27a-3p	hsa-miR-29b-3p
CAMSAP1	0.0123778	0.26825	0.319091	5	hsa-miR-154-3p	hsa-miR-15b-5p/hsa-miR-15b-5p	hsa-miR-181c-5p	hsa-miR-200a-3p	hsa-miR-26a-5p/hsa-miR-26b-5p
CARM1	0.0123778	0.26825	0.319091	5	hsa-miR-103a-3p/hsa-miR-107	hsa-miR-142-5p	hsa-miR-15b-5p/hsa-miR-15b-5p	hsa-miR-181c-5p	hsa-miR-26a-5p/hsa-miR-26b-5p
EDA	0.0123778	0.26825	0.319091	5	hsa-let-7a-5p/hsa-let-7e-5p/hsa-let-7f-5p/hsa-let-7g-5p/hsa-miR-98-5p	hsa-miR-103a-3p/hsa-miR-107	hsa-miR-15b-5p/hsa-miR-15b-5p	hsa-miR-301a-3p	hsa-miR-342-3p
FERMT2	0.0123778	0.26825	0.319091	5	hsa-miR-103a-3p/hsa-miR-107	hsa-miR-15b-5p/hsa-miR-15b-5p	hsa-miR-29b-3p	hsa-miR-301a-3p	hsa-miR-433-3p
HOXC11	0.0123778	0.26825	0.319091	5	hsa-let-7a-5p/hsa-let-7e-5p/hsa-let-7f-5p/hsa-let-7g-5p/hsa-miR-98-5p	hsa-miR-15b-5p/hsa-miR-15b-5p	hsa-miR-23a-3p/hsa-miR-23b-3p	hsa-miR-27a-3p	hsa-miR-502-3p
ARHGAP20	0.0128694	0.26825	0.368182	6	hsa-let-7a-5p/hsa-let-7e-5p/hsa-let-7f-5p/hsa-let-7g-5p/hsa-miR-98-5p	hsa-miR-148a-3p	hsa-miR-154-3p	hsa-miR-15b-5p/hsa-miR-15b-5p	hsa-miR-199a-5p	hsa-miR-23a-3p/hsa-miR-23b-3p
KBTBD8	0.0128694	0.26825	0.368182	6	hsa-miR-221-3p	hsa-miR-23a-3p/hsa-miR-23b-3p	hsa-miR-26a-5p/hsa-miR-26b-5p	hsa-miR-27a-3p	hsa-miR-29b-3p	hsa-miR-301a-3p
KIF3B	0.0128694	0.26825	0.368182	6	hsa-miR-103a-3p/hsa-miR-107	hsa-miR-127-3p	hsa-miR-143-3p	hsa-miR-15b-5p/hsa-miR-15b-5p	hsa-miR-181c-5p	hsa-miR-29b-3p
KIT	0.0128694	0.26825	0.368182	6	hsa-miR-142-5p	hsa-miR-148a-3p	hsa-miR-193a-3p/hsa-miR-193b-3p	hsa-miR-199a-5p	hsa-miR-221-3p	hsa-miR-301a-3p
LSM11	0.0128694	0.26825	0.368182	6	hsa-let-7a-5p/hsa-let-7e-5p/hsa-let-7f-5p/hsa-let-7g-5p/hsa-miR-98-5p	hsa-miR-132-3p/hsa-miR-212-3p	hsa-miR-15b-5p/hsa-miR-15b-5p	hsa-miR-26a-5p/hsa-miR-26b-5p	hsa-miR-29b-3p	hsa-miR-433-3p
MCL1	0.0128694	0.26825	0.368182	6	hsa-miR-133b	hsa-miR-142-5p	hsa-miR-181c-5p	hsa-miR-193a-3p/hsa-miR-193b-3p	hsa-miR-26a-5p/hsa-miR-26b-5p	hsa-miR-29b-3p
OSBPL3	0.0128694	0.26825	0.368182	6	hsa-let-7a-5p/hsa-let-7e-5p/hsa-let-7f-5p/hsa-let-7g-5p/hsa-miR-98-5p	hsa-miR-181c-5p	hsa-miR-221-3p	hsa-miR-29b-3p	hsa-miR-338-3p	hsa-miR-502-3p
PPM1E	0.0128694	0.26825	0.368182	6	hsa-miR-103a-3p/hsa-miR-107	hsa-miR-143-3p	hsa-miR-15b-5p/hsa-miR-15b-5p	hsa-miR-200a-3p	hsa-miR-27a-3p	hsa-miR-29b-3p
RCC2	0.0128694	0.26825	0.368182	6	hsa-miR-148a-3p	hsa-miR-191-5p	hsa-miR-22-3p	hsa-miR-29b-3p	hsa-miR-342-3p	hsa-miR-502-3p
RGMA	0.0128694	0.26825	0.368182	6	hsa-let-7a-5p/hsa-let-7e-5p/hsa-let-7f-5p/hsa-let-7g-5p/hsa-miR-98-5p	hsa-miR-142-5p	hsa-miR-148a-3p	hsa-miR-15b-5p/hsa-miR-15b-5p	hsa-miR-181c-5p	hsa-miR-199a-5p
UNC80	0.0128694	0.26825	0.368182	6	hsa-miR-103a-3p/hsa-miR-107	hsa-miR-133b	hsa-miR-15b-5p/hsa-miR-15b-5p	hsa-miR-181c-5p	hsa-miR-27a-3p	hsa-miR-502-3p
KPNA1	0.0129238	0.26825	0.503182	10	hsa-let-7a-5p/hsa-let-7e-5p/hsa-let-7f-5p/hsa-let-7g-5p/hsa-miR-98-5p	hsa-miR-103a-3p/hsa-miR-107	hsa-miR-132-3p/hsa-miR-212-3p	hsa-miR-148a-3p	hsa-miR-15b-5p/hsa-miR-15b-5p	hsa-miR-181c-5p	hsa-miR-221-3p	hsa-miR-23a-3p/hsa-miR-23b-3p	hsa-miR-29b-3p	hsa-miR-433-3p
HAS2	0.0131739	0.26825	0.444886	8	hsa-let-7a-5p/hsa-let-7e-5p/hsa-let-7f-5p/hsa-let-7g-5p/hsa-miR-98-5p	hsa-miR-132-3p/hsa-miR-212-3p	hsa-miR-15b-5p/hsa-miR-15b-5p	hsa-miR-199a-5p	hsa-miR-23a-3p/hsa-miR-23b-3p	hsa-miR-26a-5p/hsa-miR-26b-5p	hsa-miR-27a-3p	hsa-miR-29b-3p
MAP1B	0.0131739	0.26825	0.444886	8	hsa-miR-143-3p	hsa-miR-148a-3p	hsa-miR-181c-5p	hsa-miR-23a-3p/hsa-miR-23b-3p	hsa-miR-26a-5p/hsa-miR-26b-5p	hsa-miR-27a-3p	hsa-miR-301a-3p	hsa-miR-532-5p
MAP3K3	0.0131739	0.26825	0.444886	8	hsa-let-7a-5p/hsa-let-7e-5p/hsa-let-7f-5p/hsa-let-7g-5p/hsa-miR-98-5p	hsa-miR-103a-3p/hsa-miR-107	hsa-miR-132-3p/hsa-miR-212-3p	hsa-miR-133b	hsa-miR-15b-5p/hsa-miR-15b-5p	hsa-miR-181c-5p	hsa-miR-193a-3p/hsa-miR-193b-3p	hsa-miR-23a-3p/hsa-miR-23b-3p
NAA15	0.0131739	0.26825	0.444886	8	hsa-miR-103a-3p/hsa-miR-107	hsa-miR-148a-3p	hsa-miR-15b-5p/hsa-miR-15b-5p	hsa-miR-181c-5p	hsa-miR-199a-5p	hsa-miR-23a-3p/hsa-miR-23b-3p	hsa-miR-26a-5p/hsa-miR-26b-5p	hsa-miR-27a-3p
PRKG1	0.0131739	0.26825	0.444886	8	hsa-miR-103a-3p/hsa-miR-107	hsa-miR-142-5p	hsa-miR-15b-5p/hsa-miR-15b-5p	hsa-miR-181c-5p	hsa-miR-26a-5p/hsa-miR-26b-5p	hsa-miR-27a-3p	hsa-miR-29b-3p	hsa-miR-301a-3p
TMEM33	0.0131739	0.26825	0.444886	8	hsa-miR-133b	hsa-miR-22-3p	hsa-miR-23a-3p/hsa-miR-23b-3p	hsa-miR-26a-5p/hsa-miR-26b-5p	hsa-miR-27a-3p	hsa-miR-29b-3p	hsa-miR-338-3p	hsa-miR-433-3p
INO80D	0.013397	0.26825	0.477273	9	hsa-let-7a-5p/hsa-let-7e-5p/hsa-let-7f-5p/hsa-let-7g-5p/hsa-miR-98-5p	hsa-miR-143-3p	hsa-miR-181c-5p	hsa-miR-193a-3p/hsa-miR-193b-3p	hsa-miR-199a-5p	hsa-miR-23a-3p/hsa-miR-23b-3p	hsa-miR-27a-3p	hsa-miR-29b-3p	hsa-miR-342-3p
ADAMTS1	0.0140552	0.26825	0.204545	3	hsa-let-7a-5p/hsa-let-7e-5p/hsa-let-7f-5p/hsa-let-7g-5p/hsa-miR-98-5p	hsa-miR-142-5p	hsa-miR-181c-5p
ALDH5A1	0.0140552	0.26825	0.204545	3	hsa-miR-133b	hsa-miR-22-3p	hsa-miR-26a-5p/hsa-miR-26b-5p
ARL6IP1	0.0140552	0.26825	0.204545	3	hsa-miR-148a-3p	hsa-miR-23a-3p/hsa-miR-23b-3p	hsa-miR-301a-3p
BLMH	0.0140552	0.26825	0.204545	3	hsa-miR-103a-3p/hsa-miR-107	hsa-miR-143-3p	hsa-miR-29b-3p
CCDC64	0.0140552	0.26825	0.204545	3	hsa-miR-181c-5p	hsa-miR-221-3p	hsa-miR-532-5p
CD276	0.0140552	0.26825	0.204545	3	hsa-miR-199a-5p	hsa-miR-29b-3p	hsa-miR-338-3p
CINP	0.0140552	0.26825	0.204545	3	hsa-miR-103a-3p/hsa-miR-107	hsa-miR-15b-5p/hsa-miR-15b-5p	hsa-miR-338-3p
COL11A1	0.0140552	0.26825	0.204545	3	hsa-let-7a-5p/hsa-let-7e-5p/hsa-let-7f-5p/hsa-let-7g-5p/hsa-miR-98-5p	hsa-miR-26a-5p/hsa-miR-26b-5p	hsa-miR-29b-3p
ERCC6	0.0140552	0.26825	0.204545	3	hsa-let-7a-5p/hsa-let-7e-5p/hsa-let-7f-5p/hsa-let-7g-5p/hsa-miR-98-5p	hsa-miR-143-3p	hsa-miR-29b-3p
FOPNL	0.0140552	0.26825	0.204545	3	hsa-let-7a-5p/hsa-let-7e-5p/hsa-let-7f-5p/hsa-let-7g-5p/hsa-miR-98-5p	hsa-miR-23a-3p/hsa-miR-23b-3p	hsa-miR-338-3p
ITFG3	0.0140552	0.26825	0.204545	3	hsa-miR-148a-3p	hsa-miR-199a-5p	hsa-miR-301a-3p
KCNK7	0.0140552	0.26825	0.204545	3	hsa-miR-103a-3p/hsa-miR-107	hsa-miR-133b	hsa-miR-15b-5p/hsa-miR-15b-5p
MAEA	0.0140552	0.26825	0.204545	3	hsa-miR-133b	hsa-miR-181c-5p	hsa-miR-26a-5p/hsa-miR-26b-5p
MARCH2	0.0140552	0.26825	0.204545	3	hsa-miR-142-5p	hsa-miR-148a-3p	hsa-miR-301a-3p
MDFI	0.0140552	0.26825	0.204545	3	hsa-let-7a-5p/hsa-let-7e-5p/hsa-let-7f-5p/hsa-let-7g-5p/hsa-miR-98-5p	hsa-miR-23a-3p/hsa-miR-23b-3p	hsa-miR-27a-3p
MED8	0.0140552	0.26825	0.204545	3	hsa-let-7a-5p/hsa-let-7e-5p/hsa-let-7f-5p/hsa-let-7g-5p/hsa-miR-98-5p	hsa-miR-133b	hsa-miR-181c-5p
MEOX2	0.0140552	0.26825	0.204545	3	hsa-miR-148a-3p	hsa-miR-15b-5p/hsa-miR-15b-5p	hsa-miR-301a-3p
NDEL1	0.0140552	0.26825	0.204545	3	hsa-miR-103a-3p/hsa-miR-107	hsa-miR-301a-3p	hsa-miR-342-3p
NUAK2	0.0140552	0.26825	0.204545	3	hsa-miR-143-3p	hsa-miR-23a-3p/hsa-miR-23b-3p	hsa-miR-26a-5p/hsa-miR-26b-5p
PI4KA	0.0140552	0.26825	0.204545	3	hsa-miR-148a-3p	hsa-miR-199a-5p	hsa-miR-301a-3p
PNPLA6	0.0140552	0.26825	0.204545	3	hsa-miR-148a-3p	hsa-miR-15b-5p/hsa-miR-15b-5p	hsa-miR-199a-5p
RCOR3	0.0140552	0.26825	0.204545	3	hsa-miR-15b-5p/hsa-miR-15b-5p	hsa-miR-200a-3p	hsa-miR-27a-3p
RTN1	0.0140552	0.26825	0.204545	3	hsa-miR-142-5p	hsa-miR-26a-5p/hsa-miR-26b-5p	hsa-miR-301a-3p
SLC25A4	0.0140552	0.26825	0.204545	3	hsa-let-7a-5p/hsa-let-7e-5p/hsa-let-7f-5p/hsa-let-7g-5p/hsa-miR-98-5p	hsa-miR-181c-5p	hsa-miR-23a-3p/hsa-miR-23b-3p
SLC9A8	0.0140552	0.26825	0.204545	3	hsa-miR-15b-5p/hsa-miR-15b-5p	hsa-miR-181c-5p	hsa-miR-199a-5p
STAB2	0.0140552	0.26825	0.204545	3	hsa-let-7a-5p/hsa-let-7e-5p/hsa-let-7f-5p/hsa-let-7g-5p/hsa-miR-98-5p	hsa-miR-143-3p	hsa-miR-27a-3p
STARD3NL	0.0140552	0.26825	0.204545	3	hsa-let-7a-5p/hsa-let-7e-5p/hsa-let-7f-5p/hsa-let-7g-5p/hsa-miR-98-5p	hsa-miR-23a-3p/hsa-miR-23b-3p	hsa-miR-433-3p
TBKBP1	0.0140552	0.26825	0.204545	3	hsa-let-7a-5p/hsa-let-7e-5p/hsa-let-7f-5p/hsa-let-7g-5p/hsa-miR-98-5p	hsa-miR-103a-3p/hsa-miR-107	hsa-miR-27a-3p
TSFM	0.0140552	0.26825	0.204545	3	hsa-miR-181c-5p	hsa-miR-29b-3p	hsa-miR-338-3p
XXbac-BPG32J3.20	0.0140552	0.26825	0.204545	3	hsa-miR-133b	hsa-miR-193a-3p/hsa-miR-193b-3p	hsa-miR-22-3p
YRDC	0.0140552	0.26825	0.204545	3	hsa-miR-15b-5p/hsa-miR-15b-5p	hsa-miR-29b-3p	hsa-miR-338-3p
ZNF23	0.0140552	0.26825	0.204545	3	hsa-miR-181c-5p	hsa-miR-199a-5p	hsa-miR-23a-3p/hsa-miR-23b-3p
CLOCK	0.0143016	0.26825	0.535537	11	hsa-let-7a-5p/hsa-let-7e-5p/hsa-let-7f-5p/hsa-let-7g-5p/hsa-miR-98-5p	hsa-miR-103a-3p/hsa-miR-107	hsa-miR-132-3p/hsa-miR-212-3p	hsa-miR-142-5p	hsa-miR-148a-3p	hsa-miR-15b-5p/hsa-miR-15b-5p	hsa-miR-181c-5p	hsa-miR-193a-3p/hsa-miR-193b-3p	hsa-miR-199a-5p	hsa-miR-200a-3p	hsa-miR-301a-3p
A4GNT	0.0145704	0.26825	0.122727	2	hsa-miR-15b-5p/hsa-miR-15b-5p	hsa-miR-22-3p
ADRBK1	0.0145704	0.26825	0.122727	2	hsa-miR-181c-5p	hsa-miR-23a-3p/hsa-miR-23b-3p
ALKBH6	0.0145704	0.26825	0.122727	2	hsa-miR-29b-3p	hsa-miR-338-3p
APBB3	0.0145704	0.26825	0.122727	2	hsa-let-7a-5p/hsa-let-7e-5p/hsa-let-7f-5p/hsa-let-7g-5p/hsa-miR-98-5p	hsa-miR-142-5p
ARHGAP27	0.0145704	0.26825	0.122727	2	hsa-miR-22-3p	hsa-miR-23a-3p/hsa-miR-23b-3p
C3orf52	0.0145704	0.26825	0.122727	2	hsa-let-7a-5p/hsa-let-7e-5p/hsa-let-7f-5p/hsa-let-7g-5p/hsa-miR-98-5p	hsa-miR-23a-3p/hsa-miR-23b-3p
CAPN3	0.0145704	0.26825	0.122727	2	hsa-let-7a-5p/hsa-let-7e-5p/hsa-let-7f-5p/hsa-let-7g-5p/hsa-miR-98-5p	hsa-miR-532-5p
CCDC104	0.0145704	0.26825	0.122727	2	hsa-miR-22-3p	hsa-miR-23a-3p/hsa-miR-23b-3p
CCL7	0.0145704	0.26825	0.122727	2	hsa-let-7a-5p/hsa-let-7e-5p/hsa-let-7f-5p/hsa-let-7g-5p/hsa-miR-98-5p	hsa-miR-23a-3p/hsa-miR-23b-3p
CD4	0.0145704	0.26825	0.122727	2	hsa-miR-181c-5p	hsa-miR-221-3p
CMPK2	0.0145704	0.26825	0.122727	2	hsa-miR-181c-5p	hsa-miR-301a-3p
CPSF4	0.0145704	0.26825	0.122727	2	hsa-let-7a-5p/hsa-let-7e-5p/hsa-let-7f-5p/hsa-let-7g-5p/hsa-miR-98-5p	hsa-miR-23a-3p/hsa-miR-23b-3p
DNMT1	0.0145704	0.26825	0.122727	2	hsa-miR-142-5p	hsa-miR-148a-3p
EBI3	0.0145704	0.26825	0.122727	2	hsa-miR-15b-5p/hsa-miR-15b-5p	hsa-miR-27a-3p
FAM57A	0.0145704	0.26825	0.122727	2	hsa-miR-133b	hsa-miR-301a-3p
FASN	0.0145704	0.26825	0.122727	2	hsa-miR-15b-5p/hsa-miR-15b-5p	hsa-miR-27a-3p
FCHO1	0.0145704	0.26825	0.122727	2	hsa-miR-142-5p	hsa-miR-29b-3p
GBP3	0.0145704	0.26825	0.122727	2	hsa-miR-26a-5p/hsa-miR-26b-5p	hsa-miR-532-5p
GLRX	0.0145704	0.26825	0.122727	2	hsa-let-7a-5p/hsa-let-7e-5p/hsa-let-7f-5p/hsa-let-7g-5p/hsa-miR-98-5p	hsa-miR-200a-3p
ISPD	0.0145704	0.26825	0.122727	2	hsa-miR-142-5p	hsa-miR-181c-5p
KB-1507C5.2	0.0145704	0.26825	0.122727	2	hsa-miR-103a-3p/hsa-miR-107	hsa-miR-22-3p
LPL	0.0145704	0.26825	0.122727	2	hsa-miR-27a-3p	hsa-miR-29b-3p
LYSMD2	0.0145704	0.26825	0.122727	2	hsa-miR-148a-3p	hsa-miR-301a-3p
MCM3AP	0.0145704	0.26825	0.122727	2	hsa-miR-148a-3p	hsa-miR-23a-3p/hsa-miR-23b-3p
NR2C2AP	0.0145704	0.26825	0.122727	2	hsa-miR-148a-3p	hsa-miR-301a-3p
NUP160	0.0145704	0.26825	0.122727	2	hsa-miR-133b	hsa-miR-29b-3p
OLFM1	0.0145704	0.26825	0.122727	2	hsa-miR-132-3p/hsa-miR-212-3p	hsa-miR-200a-3p
OTOGL	0.0145704	0.26825	0.122727	2	hsa-miR-15b-5p/hsa-miR-15b-5p	hsa-miR-181c-5p
PLA2G3	0.0145704	0.26825	0.122727	2	hsa-let-7a-5p/hsa-let-7e-5p/hsa-let-7f-5p/hsa-let-7g-5p/hsa-miR-98-5p	hsa-miR-338-3p
PLD3	0.0145704	0.26825	0.122727	2	hsa-let-7a-5p/hsa-let-7e-5p/hsa-let-7f-5p/hsa-let-7g-5p/hsa-miR-98-5p	hsa-miR-338-3p
PPM1G	0.0145704	0.26825	0.122727	2	hsa-miR-132-3p/hsa-miR-212-3p	hsa-miR-142-5p
PPT2	0.0145704	0.26825	0.122727	2	hsa-miR-15b-5p/hsa-miR-15b-5p	hsa-miR-200a-3p
RAB40A	0.0145704	0.26825	0.122727	2	hsa-miR-103a-3p/hsa-miR-107	hsa-miR-15b-5p/hsa-miR-15b-5p
RAB40AL	0.0145704	0.26825	0.122727	2	hsa-miR-103a-3p/hsa-miR-107	hsa-miR-15b-5p/hsa-miR-15b-5p
RBM17	0.0145704	0.26825	0.122727	2	hsa-miR-301a-3p	hsa-miR-433-3p
RIC8A	0.0145704	0.26825	0.122727	2	hsa-miR-15b-5p/hsa-miR-15b-5p	hsa-miR-29b-3p
SF3A3	0.0145704	0.26825	0.122727	2	hsa-miR-338-3p	hsa-miR-532-5p
SLC13A2	0.0145704	0.26825	0.122727	2	hsa-miR-148a-3p	hsa-miR-301a-3p
SNCG	0.0145704	0.26825	0.122727	2	hsa-miR-103a-3p/hsa-miR-107	hsa-miR-15b-5p/hsa-miR-15b-5p
SNX5	0.0145704	0.26825	0.122727	2	hsa-miR-23a-3p/hsa-miR-23b-3p	hsa-miR-301a-3p
SYNPR	0.0145704	0.26825	0.122727	2	hsa-miR-142-5p	hsa-miR-181c-5p
TEX19	0.0145704	0.26825	0.122727	2	hsa-miR-15b-5p/hsa-miR-15b-5p	hsa-miR-338-3p
TMEM215	0.0145704	0.26825	0.122727	2	hsa-miR-132-3p/hsa-miR-212-3p	hsa-miR-199a-5p
TMEM54	0.0145704	0.26825	0.122727	2	hsa-miR-142-5p	hsa-miR-148a-3p
TXN2	0.0145704	0.26825	0.122727	2	hsa-miR-15b-5p/hsa-miR-15b-5p	hsa-miR-27a-3p
UPK1B	0.0145704	0.26825	0.122727	2	hsa-miR-29b-3p	hsa-miR-338-3p
UQCRFS1	0.0145704	0.26825	0.122727	2	hsa-miR-132-3p/hsa-miR-212-3p	hsa-miR-23a-3p/hsa-miR-23b-3p
USP19	0.0145704	0.26825	0.122727	2	hsa-miR-15b-5p/hsa-miR-15b-5p	hsa-miR-199a-5p
VAMP8	0.0145704	0.26825	0.122727	2	hsa-miR-103a-3p/hsa-miR-107	hsa-miR-15b-5p/hsa-miR-15b-5p
ZIK1	0.0145704	0.26825	0.122727	2	hsa-miR-181c-5p	hsa-miR-199a-5p
ZNF256	0.0145704	0.26825	0.122727	2	hsa-miR-181c-5p	hsa-miR-199a-5p
ZNF274	0.0145704	0.26825	0.122727	2	hsa-miR-148a-3p	hsa-miR-23a-3p/hsa-miR-23b-3p
ZNF300	0.0145704	0.26825	0.122727	2	hsa-miR-181c-5p	hsa-miR-199a-5p
ZNF329	0.0145704	0.26825	0.122727	2	hsa-miR-199a-5p	hsa-miR-23a-3p/hsa-miR-23b-3p
ZNF594	0.0145704	0.26825	0.122727	2	hsa-miR-181c-5p	hsa-miR-199a-5p
ZNF788	0.0145704	0.26825	0.122727	2	hsa-miR-181c-5p	hsa-miR-199a-5p
ATG2B	0.0149222	0.26825	0.276136	4	hsa-miR-142-5p	hsa-miR-143-3p	hsa-miR-181c-5p	hsa-miR-301a-3p
BTLA	0.0149222	0.26825	0.276136	4	hsa-miR-103a-3p/hsa-miR-107	hsa-miR-15b-5p/hsa-miR-15b-5p	hsa-miR-23a-3p/hsa-miR-23b-3p	hsa-miR-26a-5p/hsa-miR-26b-5p
CDH5	0.0149222	0.26825	0.276136	4	hsa-miR-143-3p	hsa-miR-22-3p	hsa-miR-27a-3p	hsa-miR-502-3p
CTGF	0.0149222	0.26825	0.276136	4	hsa-miR-132-3p/hsa-miR-212-3p	hsa-miR-133b	hsa-miR-143-3p	hsa-miR-26a-5p/hsa-miR-26b-5p
EOGT	0.0149222	0.26825	0.276136	4	hsa-let-7a-5p/hsa-let-7e-5p/hsa-let-7f-5p/hsa-let-7g-5p/hsa-miR-98-5p	hsa-miR-148a-3p	hsa-miR-23a-3p/hsa-miR-23b-3p	hsa-miR-301a-3p
FAM105B	0.0149222	0.26825	0.276136	4	hsa-miR-132-3p/hsa-miR-212-3p	hsa-miR-181c-5p	hsa-miR-27a-3p	hsa-miR-29b-3p
HOXB5	0.0149222	0.26825	0.276136	4	hsa-miR-133b	hsa-miR-181c-5p	hsa-miR-200a-3p	hsa-miR-23a-3p/hsa-miR-23b-3p
HSPA12A	0.0149222	0.26825	0.276136	4	hsa-miR-103a-3p/hsa-miR-107	hsa-miR-199a-5p	hsa-miR-23a-3p/hsa-miR-23b-3p	hsa-miR-338-3p
ITGA1	0.0149222	0.26825	0.276136	4	hsa-let-7a-5p/hsa-let-7e-5p/hsa-let-7f-5p/hsa-let-7g-5p/hsa-miR-98-5p	hsa-miR-181c-5p	hsa-miR-23a-3p/hsa-miR-23b-3p	hsa-miR-27a-3p
KATNAL1	0.0149222	0.26825	0.276136	4	hsa-let-7a-5p/hsa-let-7e-5p/hsa-let-7f-5p/hsa-let-7g-5p/hsa-miR-98-5p	hsa-miR-15b-5p/hsa-miR-15b-5p	hsa-miR-200a-3p	hsa-miR-433-3p
LIMK2	0.0149222	0.26825	0.276136	4	hsa-let-7a-5p/hsa-let-7e-5p/hsa-let-7f-5p/hsa-let-7g-5p/hsa-miR-98-5p	hsa-miR-143-3p	hsa-miR-23a-3p/hsa-miR-23b-3p	hsa-miR-27a-3p
MDFIC	0.0149222	0.26825	0.276136	4	hsa-miR-132-3p/hsa-miR-212-3p	hsa-miR-148a-3p	hsa-miR-23a-3p/hsa-miR-23b-3p	hsa-miR-301a-3p
MED26	0.0149222	0.26825	0.276136	4	hsa-miR-103a-3p/hsa-miR-107	hsa-miR-15b-5p/hsa-miR-15b-5p	hsa-miR-181c-5p	hsa-miR-29b-3p
RPH3A	0.0149222	0.26825	0.276136	4	hsa-miR-132-3p/hsa-miR-212-3p	hsa-miR-221-3p	hsa-miR-338-3p	hsa-miR-502-3p
SLC26A9	0.0149222	0.26825	0.276136	4	hsa-let-7a-5p/hsa-let-7e-5p/hsa-let-7f-5p/hsa-let-7g-5p/hsa-miR-98-5p	hsa-miR-181c-5p	hsa-miR-22-3p	hsa-miR-26a-5p/hsa-miR-26b-5p
SNAP29	0.0149222	0.26825	0.276136	4	hsa-miR-142-5p	hsa-miR-221-3p	hsa-miR-23a-3p/hsa-miR-23b-3p	hsa-miR-338-3p
SRSF2	0.0149222	0.26825	0.276136	4	hsa-miR-193a-3p/hsa-miR-193b-3p	hsa-miR-221-3p	hsa-miR-301a-3p	hsa-miR-338-3p
STRADB	0.0149222	0.26825	0.276136	4	hsa-miR-148a-3p	hsa-miR-15b-5p/hsa-miR-15b-5p	hsa-miR-199a-5p	hsa-miR-26a-5p/hsa-miR-26b-5p
STXBP1	0.0149222	0.26825	0.276136	4	hsa-miR-143-3p	hsa-miR-15b-5p/hsa-miR-15b-5p	hsa-miR-200a-3p	hsa-miR-338-3p
TERT	0.0149222	0.26825	0.276136	4	hsa-miR-103a-3p/hsa-miR-107	hsa-miR-143-3p	hsa-miR-15b-5p/hsa-miR-15b-5p	hsa-miR-338-3p
TNFRSF1B	0.0149222	0.26825	0.276136	4	hsa-let-7a-5p/hsa-let-7e-5p/hsa-let-7f-5p/hsa-let-7g-5p/hsa-miR-98-5p	hsa-miR-148a-3p	hsa-miR-22-3p	hsa-miR-301a-3p
UGT8	0.0149222	0.26825	0.276136	4	hsa-miR-148a-3p	hsa-miR-26a-5p/hsa-miR-26b-5p	hsa-miR-27a-3p	hsa-miR-301a-3p
WNT10B	0.0149222	0.26825	0.276136	4	hsa-miR-148a-3p	hsa-miR-15b-5p/hsa-miR-15b-5p	hsa-miR-22-3p	hsa-miR-29b-3p
WTAP	0.0149222	0.26825	0.276136	4	hsa-miR-132-3p/hsa-miR-212-3p	hsa-miR-133b	hsa-miR-200a-3p	hsa-miR-23a-3p/hsa-miR-23b-3p
ZNF784	0.0149222	0.26825	0.276136	4	hsa-let-7a-5p/hsa-let-7e-5p/hsa-let-7f-5p/hsa-let-7g-5p/hsa-miR-98-5p	hsa-miR-148a-3p	hsa-miR-199a-5p	hsa-miR-301a-3p
ATXN7L1	0.0154295	0.275435	0.420779	7	hsa-miR-103a-3p/hsa-miR-107	hsa-miR-148a-3p	hsa-miR-15b-5p/hsa-miR-15b-5p	hsa-miR-199a-5p	hsa-miR-200a-3p	hsa-miR-301a-3p	hsa-miR-338-3p
TARDBP	0.0154295	0.275435	0.420779	7	hsa-miR-103a-3p/hsa-miR-107	hsa-miR-143-3p	hsa-miR-181c-5p	hsa-miR-23a-3p/hsa-miR-23b-3p	hsa-miR-27a-3p	hsa-miR-301a-3p	hsa-miR-502-3p
WDFY2	0.0154295	0.275435	0.420779	7	hsa-let-7a-5p/hsa-let-7e-5p/hsa-let-7f-5p/hsa-let-7g-5p/hsa-miR-98-5p	hsa-miR-103a-3p/hsa-miR-107	hsa-miR-15b-5p/hsa-miR-15b-5p	hsa-miR-181c-5p	hsa-miR-23a-3p/hsa-miR-23b-3p	hsa-miR-27a-3p	hsa-miR-301a-3p
BRWD3	0.0155667	0.277239	0.515455	10	hsa-let-7a-5p/hsa-let-7e-5p/hsa-let-7f-5p/hsa-let-7g-5p/hsa-miR-98-5p	hsa-miR-142-5p	hsa-miR-148a-3p	hsa-miR-193a-3p/hsa-miR-193b-3p	hsa-miR-221-3p	hsa-miR-22-3p	hsa-miR-26a-5p/hsa-miR-26b-5p	hsa-miR-27a-3p	hsa-miR-29b-3p	hsa-miR-301a-3p
PPARGC1A	0.016369	0.288828	0.490909	9	hsa-let-7a-5p/hsa-let-7e-5p/hsa-let-7f-5p/hsa-let-7g-5p/hsa-miR-98-5p	hsa-miR-148a-3p	hsa-miR-154-3p	hsa-miR-193a-3p/hsa-miR-193b-3p	hsa-miR-199a-5p	hsa-miR-23a-3p/hsa-miR-23b-3p	hsa-miR-29b-3p	hsa-miR-301a-3p	hsa-miR-433-3p
SLC5A3	0.016369	0.288828	0.490909	9	hsa-miR-103a-3p/hsa-miR-107	hsa-miR-142-5p	hsa-miR-148a-3p	hsa-miR-154-3p	hsa-miR-15b-5p/hsa-miR-15b-5p	hsa-miR-200a-3p	hsa-miR-23a-3p/hsa-miR-23b-3p	hsa-miR-27a-3p	hsa-miR-342-3p
YY1	0.016369	0.288828	0.490909	9	hsa-let-7a-5p/hsa-let-7e-5p/hsa-let-7f-5p/hsa-let-7g-5p/hsa-miR-98-5p	hsa-miR-142-5p	hsa-miR-181c-5p	hsa-miR-200a-3p	hsa-miR-29b-3p	hsa-miR-301a-3p	hsa-miR-433-3p	hsa-miR-502-3p	hsa-miR-532-5p
CNOT6L	0.0164432	0.288828	0.460227	8	hsa-let-7a-5p/hsa-let-7e-5p/hsa-let-7f-5p/hsa-let-7g-5p/hsa-miR-98-5p	hsa-miR-103a-3p/hsa-miR-107	hsa-miR-15b-5p/hsa-miR-15b-5p	hsa-miR-181c-5p	hsa-miR-199a-5p	hsa-miR-22-3p	hsa-miR-23a-3p/hsa-miR-23b-3p	hsa-miR-301a-3p
PAG1	0.0164432	0.288828	0.460227	8	hsa-let-7a-5p/hsa-let-7e-5p/hsa-let-7f-5p/hsa-let-7g-5p/hsa-miR-98-5p	hsa-miR-103a-3p/hsa-miR-107	hsa-miR-143-3p	hsa-miR-148a-3p	hsa-miR-15b-5p/hsa-miR-15b-5p	hsa-miR-23a-3p/hsa-miR-23b-3p	hsa-miR-26a-5p/hsa-miR-26b-5p	hsa-miR-29b-3p
SRGAP1	0.0164432	0.288828	0.460227	8	hsa-let-7a-5p/hsa-let-7e-5p/hsa-let-7f-5p/hsa-let-7g-5p/hsa-miR-98-5p	hsa-miR-103a-3p/hsa-miR-107	hsa-miR-132-3p/hsa-miR-212-3p	hsa-miR-142-5p	hsa-miR-15b-5p/hsa-miR-15b-5p	hsa-miR-181c-5p	hsa-miR-23a-3p/hsa-miR-23b-3p	hsa-miR-26a-5p/hsa-miR-26b-5p
CDK5R1	0.017192	0.298883	0.388636	6	hsa-miR-103a-3p/hsa-miR-107	hsa-miR-133b	hsa-miR-148a-3p	hsa-miR-15b-5p/hsa-miR-15b-5p	hsa-miR-26a-5p/hsa-miR-26b-5p	hsa-miR-27a-3p
WASL	0.017192	0.298883	0.388636	6	hsa-let-7a-5p/hsa-let-7e-5p/hsa-let-7f-5p/hsa-let-7g-5p/hsa-miR-98-5p	hsa-miR-148a-3p	hsa-miR-15b-5p/hsa-miR-15b-5p	hsa-miR-181c-5p	hsa-miR-23a-3p/hsa-miR-23b-3p	hsa-miR-301a-3p
ZHX3	0.017192	0.298883	0.388636	6	hsa-miR-103a-3p/hsa-miR-107	hsa-miR-133b	hsa-miR-143-3p	hsa-miR-15b-5p/hsa-miR-15b-5p	hsa-miR-193a-3p/hsa-miR-193b-3p	hsa-miR-29b-3p
AKAP5	0.0175997	0.298883	0.343636	5	hsa-let-7a-5p/hsa-let-7e-5p/hsa-let-7f-5p/hsa-let-7g-5p/hsa-miR-98-5p	hsa-miR-142-5p	hsa-miR-181c-5p	hsa-miR-221-3p	hsa-miR-29b-3p
DUSP7	0.0175997	0.298883	0.343636	5	hsa-let-7a-5p/hsa-let-7e-5p/hsa-let-7f-5p/hsa-let-7g-5p/hsa-miR-98-5p	hsa-miR-133b	hsa-miR-191-5p	hsa-miR-193a-3p/hsa-miR-193b-3p	hsa-miR-200a-3p
EML6	0.0175997	0.298883	0.343636	5	hsa-miR-148a-3p	hsa-miR-15b-5p/hsa-miR-15b-5p	hsa-miR-221-3p	hsa-miR-29b-3p	hsa-miR-502-3p
ERBB3	0.0175997	0.298883	0.343636	5	hsa-miR-143-3p	hsa-miR-148a-3p	hsa-miR-221-3p	hsa-miR-22-3p	hsa-miR-301a-3p
HOXB2	0.0175997	0.298883	0.343636	5	hsa-miR-103a-3p/hsa-miR-107	hsa-miR-142-5p	hsa-miR-143-3p	hsa-miR-191-5p	hsa-miR-301a-3p
KCTD20	0.0175997	0.298883	0.343636	5	hsa-miR-133b	hsa-miR-200a-3p	hsa-miR-26a-5p/hsa-miR-26b-5p	hsa-miR-29b-3p	hsa-miR-301a-3p
PDE5A	0.0175997	0.298883	0.343636	5	hsa-miR-132-3p/hsa-miR-212-3p	hsa-miR-148a-3p	hsa-miR-181c-5p	hsa-miR-22-3p	hsa-miR-301a-3p
PLEKHH1	0.0175997	0.298883	0.343636	5	hsa-let-7a-5p/hsa-let-7e-5p/hsa-let-7f-5p/hsa-let-7g-5p/hsa-miR-98-5p	hsa-miR-15b-5p/hsa-miR-15b-5p	hsa-miR-199a-5p	hsa-miR-26a-5p/hsa-miR-26b-5p	hsa-miR-27a-3p
PPFIA2	0.0175997	0.298883	0.343636	5	hsa-miR-133b	hsa-miR-148a-3p	hsa-miR-15b-5p/hsa-miR-15b-5p	hsa-miR-27a-3p	hsa-miR-301a-3p
RAB11FIP2	0.0175997	0.298883	0.343636	5	hsa-miR-103a-3p/hsa-miR-107	hsa-miR-15b-5p/hsa-miR-15b-5p	hsa-miR-181c-5p	hsa-miR-23a-3p/hsa-miR-23b-3p	hsa-miR-27a-3p
SOS2	0.0175997	0.298883	0.343636	5	hsa-miR-148a-3p	hsa-miR-15b-5p/hsa-miR-15b-5p	hsa-miR-193a-3p/hsa-miR-193b-3p	hsa-miR-199a-5p	hsa-miR-301a-3p
SULF1	0.0175997	0.298883	0.343636	5	hsa-let-7a-5p/hsa-let-7e-5p/hsa-let-7f-5p/hsa-let-7g-5p/hsa-miR-98-5p	hsa-miR-148a-3p	hsa-miR-199a-5p	hsa-miR-26a-5p/hsa-miR-26b-5p	hsa-miR-301a-3p
BCL7A	0.0195951	0.326274	0.438312	7	hsa-let-7a-5p/hsa-let-7e-5p/hsa-let-7f-5p/hsa-let-7g-5p/hsa-miR-98-5p	hsa-miR-148a-3p	hsa-miR-15b-5p/hsa-miR-15b-5p	hsa-miR-199a-5p	hsa-miR-27a-3p	hsa-miR-29b-3p	hsa-miR-502-3p
CALM1	0.0195951	0.326274	0.438312	7	hsa-let-7a-5p/hsa-let-7e-5p/hsa-let-7f-5p/hsa-let-7g-5p/hsa-miR-98-5p	hsa-miR-133b	hsa-miR-142-5p	hsa-miR-143-3p	hsa-miR-15b-5p/hsa-miR-15b-5p	hsa-miR-181c-5p	hsa-miR-193a-3p/hsa-miR-193b-3p
CECR2	0.0195951	0.326274	0.438312	7	hsa-let-7a-5p/hsa-let-7e-5p/hsa-let-7f-5p/hsa-let-7g-5p/hsa-miR-98-5p	hsa-miR-103a-3p/hsa-miR-107	hsa-miR-181c-5p	hsa-miR-193a-3p/hsa-miR-193b-3p	hsa-miR-199a-5p	hsa-miR-22-3p	hsa-miR-27a-3p
DICER1	0.0195951	0.326274	0.438312	7	hsa-let-7a-5p/hsa-let-7e-5p/hsa-let-7f-5p/hsa-let-7g-5p/hsa-miR-98-5p	hsa-miR-103a-3p/hsa-miR-107	hsa-miR-148a-3p	hsa-miR-15b-5p/hsa-miR-15b-5p	hsa-miR-221-3p	hsa-miR-29b-3p	hsa-miR-301a-3p
FOXN3	0.0195951	0.326274	0.438312	7	hsa-miR-132-3p/hsa-miR-212-3p	hsa-miR-133b	hsa-miR-154-3p	hsa-miR-200a-3p	hsa-miR-27a-3p	hsa-miR-29b-3p	hsa-miR-433-3p
FSTL4	0.0195951	0.326274	0.438312	7	hsa-let-7a-5p/hsa-let-7e-5p/hsa-let-7f-5p/hsa-let-7g-5p/hsa-miR-98-5p	hsa-miR-103a-3p/hsa-miR-107	hsa-miR-142-5p	hsa-miR-154-3p	hsa-miR-199a-5p	hsa-miR-23a-3p/hsa-miR-23b-3p	hsa-miR-27a-3p
NFATC2	0.0195951	0.326274	0.438312	7	hsa-miR-103a-3p/hsa-miR-107	hsa-miR-132-3p/hsa-miR-212-3p	hsa-miR-143-3p	hsa-miR-15b-5p/hsa-miR-15b-5p	hsa-miR-181c-5p	hsa-miR-221-3p	hsa-miR-301a-3p
PGM2L1	0.0195951	0.326274	0.438312	7	hsa-let-7a-5p/hsa-let-7e-5p/hsa-let-7f-5p/hsa-let-7g-5p/hsa-miR-98-5p	hsa-miR-15b-5p/hsa-miR-15b-5p	hsa-miR-181c-5p	hsa-miR-200a-3p	hsa-miR-26a-5p/hsa-miR-26b-5p	hsa-miR-27a-3p	hsa-miR-301a-3p
SMAD5	0.0195951	0.326274	0.438312	7	hsa-miR-132-3p/hsa-miR-212-3p	hsa-miR-142-5p	hsa-miR-148a-3p	hsa-miR-15b-5p/hsa-miR-15b-5p	hsa-miR-23a-3p/hsa-miR-23b-3p	hsa-miR-27a-3p	hsa-miR-301a-3p
MED12L	0.0198164	0.328533	0.504545	9	hsa-miR-133b	hsa-miR-142-5p	hsa-miR-148a-3p	hsa-miR-181c-5p	hsa-miR-23a-3p/hsa-miR-23b-3p	hsa-miR-26a-5p/hsa-miR-26b-5p	hsa-miR-27a-3p	hsa-miR-29b-3p	hsa-miR-301a-3p
PLAG1	0.0198164	0.328533	0.504545	9	hsa-miR-103a-3p/hsa-miR-107	hsa-miR-15b-5p/hsa-miR-15b-5p	hsa-miR-181c-5p	hsa-miR-193a-3p/hsa-miR-193b-3p	hsa-miR-200a-3p	hsa-miR-23a-3p/hsa-miR-23b-3p	hsa-miR-27a-3p	hsa-miR-29b-3p	hsa-miR-532-5p
ACVR2A	0.020281	0.331934	0.475568	8	hsa-let-7a-5p/hsa-let-7e-5p/hsa-let-7f-5p/hsa-let-7g-5p/hsa-miR-98-5p	hsa-miR-15b-5p/hsa-miR-15b-5p	hsa-miR-181c-5p	hsa-miR-199a-5p	hsa-miR-200a-3p	hsa-miR-27a-3p	hsa-miR-29b-3p	hsa-miR-301a-3p
CCDC6	0.020281	0.331934	0.475568	8	hsa-miR-103a-3p/hsa-miR-107	hsa-miR-148a-3p	hsa-miR-15b-5p/hsa-miR-15b-5p	hsa-miR-181c-5p	hsa-miR-200a-3p	hsa-miR-23a-3p/hsa-miR-23b-3p	hsa-miR-26a-5p/hsa-miR-26b-5p	hsa-miR-301a-3p
DYNC1LI2	0.020281	0.331934	0.475568	8	hsa-miR-103a-3p/hsa-miR-107	hsa-miR-132-3p/hsa-miR-212-3p	hsa-miR-133b	hsa-miR-15b-5p/hsa-miR-15b-5p	hsa-miR-181c-5p	hsa-miR-221-3p	hsa-miR-301a-3p	hsa-miR-433-3p
EPHA7	0.020281	0.331934	0.475568	8	hsa-miR-133b	hsa-miR-15b-5p/hsa-miR-15b-5p	hsa-miR-181c-5p	hsa-miR-199a-5p	hsa-miR-200a-3p	hsa-miR-26a-5p/hsa-miR-26b-5p	hsa-miR-301a-3p	hsa-miR-433-3p
GJA9	0.020281	0.331934	0.475568	8	hsa-let-7a-5p/hsa-let-7e-5p/hsa-let-7f-5p/hsa-let-7g-5p/hsa-miR-98-5p	hsa-miR-15b-5p/hsa-miR-15b-5p	hsa-miR-181c-5p	hsa-miR-22-3p	hsa-miR-23a-3p/hsa-miR-23b-3p	hsa-miR-26a-5p/hsa-miR-26b-5p	hsa-miR-27a-3p	hsa-miR-338-3p
SREK1	0.020281	0.331934	0.475568	8	hsa-let-7a-5p/hsa-let-7e-5p/hsa-let-7f-5p/hsa-let-7g-5p/hsa-miR-98-5p	hsa-miR-103a-3p/hsa-miR-107	hsa-miR-154-3p	hsa-miR-15b-5p/hsa-miR-15b-5p	hsa-miR-200a-3p	hsa-miR-27a-3p	hsa-miR-433-3p	hsa-miR-502-3p
ZBTB34	0.0220875	0.337829	0.54	10	hsa-miR-103a-3p/hsa-miR-107	hsa-miR-132-3p/hsa-miR-212-3p	hsa-miR-142-5p	hsa-miR-15b-5p/hsa-miR-15b-5p	hsa-miR-181c-5p	hsa-miR-191-5p	hsa-miR-200a-3p	hsa-miR-23a-3p/hsa-miR-23b-3p	hsa-miR-27a-3p	hsa-miR-29b-3p
CDON	0.0224454	0.337829	0.409091	6	hsa-miR-142-5p	hsa-miR-181c-5p	hsa-miR-200a-3p	hsa-miR-221-3p	hsa-miR-27a-3p	hsa-miR-338-3p
DDX3Y	0.0224454	0.337829	0.409091	6	hsa-miR-133b	hsa-miR-15b-5p/hsa-miR-15b-5p	hsa-miR-181c-5p	hsa-miR-199a-5p	hsa-miR-26a-5p/hsa-miR-26b-5p	hsa-miR-29b-3p
EVX2	0.0224454	0.337829	0.409091	6	hsa-miR-143-3p	hsa-miR-181c-5p	hsa-miR-199a-5p	hsa-miR-200a-3p	hsa-miR-26a-5p/hsa-miR-26b-5p	hsa-miR-502-3p
HUNK	0.0224454	0.337829	0.409091	6	hsa-miR-132-3p/hsa-miR-212-3p	hsa-miR-154-3p	hsa-miR-22-3p	hsa-miR-27a-3p	hsa-miR-338-3p	hsa-miR-342-3p
LASP1	0.0224454	0.337829	0.409091	6	hsa-miR-133b	hsa-miR-143-3p	hsa-miR-199a-5p	hsa-miR-23a-3p/hsa-miR-23b-3p	hsa-miR-27a-3p	hsa-miR-29b-3p
MMP24	0.0224454	0.337829	0.409091	6	hsa-miR-103a-3p/hsa-miR-107	hsa-miR-142-5p	hsa-miR-15b-5p/hsa-miR-15b-5p	hsa-miR-200a-3p	hsa-miR-22-3p	hsa-miR-29b-3p
MSL1	0.0224454	0.337829	0.409091	6	hsa-miR-143-3p	hsa-miR-15b-5p/hsa-miR-15b-5p	hsa-miR-200a-3p	hsa-miR-221-3p	hsa-miR-27a-3p	hsa-miR-29b-3p
NOL4	0.0224454	0.337829	0.409091	6	hsa-miR-148a-3p	hsa-miR-181c-5p	hsa-miR-23a-3p/hsa-miR-23b-3p	hsa-miR-27a-3p	hsa-miR-301a-3p	hsa-miR-338-3p
PAPD4	0.0224454	0.337829	0.409091	6	hsa-miR-148a-3p	hsa-miR-154-3p	hsa-miR-15b-5p/hsa-miR-15b-5p	hsa-miR-200a-3p	hsa-miR-26a-5p/hsa-miR-26b-5p	hsa-miR-301a-3p
PGRMC2	0.0224454	0.337829	0.409091	6	hsa-miR-103a-3p/hsa-miR-107	hsa-miR-142-5p	hsa-miR-181c-5p	hsa-miR-200a-3p	hsa-miR-23a-3p/hsa-miR-23b-3p	hsa-miR-26a-5p/hsa-miR-26b-5p
RNF141	0.0224454	0.337829	0.409091	6	hsa-miR-181c-5p	hsa-miR-23a-3p/hsa-miR-23b-3p	hsa-miR-26a-5p/hsa-miR-26b-5p	hsa-miR-27a-3p	hsa-miR-29b-3p	hsa-miR-338-3p
SLC10A7	0.0224454	0.337829	0.409091	6	hsa-let-7a-5p/hsa-let-7e-5p/hsa-let-7f-5p/hsa-let-7g-5p/hsa-miR-98-5p	hsa-miR-132-3p/hsa-miR-212-3p	hsa-miR-15b-5p/hsa-miR-15b-5p	hsa-miR-181c-5p	hsa-miR-27a-3p	hsa-miR-29b-3p
VMP1	0.0224454	0.337829	0.409091	6	hsa-miR-132-3p/hsa-miR-212-3p	hsa-miR-142-5p	hsa-miR-143-3p	hsa-miR-148a-3p	hsa-miR-23a-3p/hsa-miR-23b-3p	hsa-miR-301a-3p
ABCG4	0.0227555	0.337829	0.306818	4	hsa-miR-132-3p/hsa-miR-212-3p	hsa-miR-133b	hsa-miR-142-5p	hsa-miR-15b-5p/hsa-miR-15b-5p
ABTB2	0.0227555	0.337829	0.306818	4	hsa-miR-154-3p	hsa-miR-15b-5p/hsa-miR-15b-5p	hsa-miR-181c-5p	hsa-miR-199a-5p
AKAP11	0.0227555	0.337829	0.306818	4	hsa-miR-142-5p	hsa-miR-15b-5p/hsa-miR-15b-5p	hsa-miR-200a-3p	hsa-miR-301a-3p
C9orf69	0.0227555	0.337829	0.306818	4	hsa-miR-103a-3p/hsa-miR-107	hsa-miR-15b-5p/hsa-miR-15b-5p	hsa-miR-29b-3p	hsa-miR-301a-3p
CAPRIN2	0.0227555	0.337829	0.306818	4	hsa-miR-181c-5p	hsa-miR-221-3p	hsa-miR-27a-3p	hsa-miR-301a-3p
CCAR1	0.0227555	0.337829	0.306818	4	hsa-miR-181c-5p	hsa-miR-193a-3p/hsa-miR-193b-3p	hsa-miR-23a-3p/hsa-miR-23b-3p	hsa-miR-433-3p
CCNA2	0.0227555	0.337829	0.306818	4	hsa-miR-148a-3p	hsa-miR-27a-3p	hsa-miR-29b-3p	hsa-miR-301a-3p
CCNJL	0.0227555	0.337829	0.306818	4	hsa-let-7a-5p/hsa-let-7e-5p/hsa-let-7f-5p/hsa-let-7g-5p/hsa-miR-98-5p	hsa-miR-15b-5p/hsa-miR-15b-5p	hsa-miR-22-3p	hsa-miR-26a-5p/hsa-miR-26b-5p
CEP135	0.0227555	0.337829	0.306818	4	hsa-let-7a-5p/hsa-let-7e-5p/hsa-let-7f-5p/hsa-let-7g-5p/hsa-miR-98-5p	hsa-miR-181c-5p	hsa-miR-27a-3p	hsa-miR-433-3p
CNKSR2	0.0227555	0.337829	0.306818	4	hsa-miR-133b	hsa-miR-15b-5p/hsa-miR-15b-5p	hsa-miR-181c-5p	hsa-miR-22-3p
COL4A1	0.0227555	0.337829	0.306818	4	hsa-let-7a-5p/hsa-let-7e-5p/hsa-let-7f-5p/hsa-let-7g-5p/hsa-miR-98-5p	hsa-miR-148a-3p	hsa-miR-23a-3p/hsa-miR-23b-3p	hsa-miR-29b-3p
CRLF3	0.0227555	0.337829	0.306818	4	hsa-miR-143-3p	hsa-miR-200a-3p	hsa-miR-23a-3p/hsa-miR-23b-3p	hsa-miR-433-3p
DNM3	0.0227555	0.337829	0.306818	4	hsa-miR-22-3p	hsa-miR-23a-3p/hsa-miR-23b-3p	hsa-miR-29b-3p	hsa-miR-342-3p
DZIP1	0.0227555	0.337829	0.306818	4	hsa-let-7a-5p/hsa-let-7e-5p/hsa-let-7f-5p/hsa-let-7g-5p/hsa-miR-98-5p	hsa-miR-15b-5p/hsa-miR-15b-5p	hsa-miR-200a-3p	hsa-miR-23a-3p/hsa-miR-23b-3p
EGR1	0.0227555	0.337829	0.306818	4	hsa-miR-132-3p/hsa-miR-212-3p	hsa-miR-181c-5p	hsa-miR-191-5p	hsa-miR-23a-3p/hsa-miR-23b-3p
FASTK	0.0227555	0.337829	0.306818	4	hsa-let-7a-5p/hsa-let-7e-5p/hsa-let-7f-5p/hsa-let-7g-5p/hsa-miR-98-5p	hsa-miR-15b-5p/hsa-miR-15b-5p	hsa-miR-29b-3p	hsa-miR-301a-3p
GPATCH8	0.0227555	0.337829	0.306818	4	hsa-miR-103a-3p/hsa-miR-107	hsa-miR-148a-3p	hsa-miR-15b-5p/hsa-miR-15b-5p	hsa-miR-301a-3p
HOXA3	0.0227555	0.337829	0.306818	4	hsa-miR-15b-5p/hsa-miR-15b-5p	hsa-miR-23a-3p/hsa-miR-23b-3p	hsa-miR-301a-3p	hsa-miR-338-3p
LRP2	0.0227555	0.337829	0.306818	4	hsa-miR-103a-3p/hsa-miR-107	hsa-miR-148a-3p	hsa-miR-15b-5p/hsa-miR-15b-5p	hsa-miR-301a-3p
NRCAM	0.0227555	0.337829	0.306818	4	hsa-miR-132-3p/hsa-miR-212-3p	hsa-miR-191-5p	hsa-miR-200a-3p	hsa-miR-27a-3p
PLEKHH2	0.0227555	0.337829	0.306818	4	hsa-miR-23a-3p/hsa-miR-23b-3p	hsa-miR-27a-3p	hsa-miR-342-3p	hsa-miR-433-3p
SLC30A9	0.0227555	0.337829	0.306818	4	hsa-miR-148a-3p	hsa-miR-193a-3p/hsa-miR-193b-3p	hsa-miR-23a-3p/hsa-miR-23b-3p	hsa-miR-338-3p
SLC38A9	0.0227555	0.337829	0.306818	4	hsa-let-7a-5p/hsa-let-7e-5p/hsa-let-7f-5p/hsa-let-7g-5p/hsa-miR-98-5p	hsa-miR-143-3p	hsa-miR-200a-3p	hsa-miR-26a-5p/hsa-miR-26b-5p
SLCO5A1	0.0227555	0.337829	0.306818	4	hsa-let-7a-5p/hsa-let-7e-5p/hsa-let-7f-5p/hsa-let-7g-5p/hsa-miR-98-5p	hsa-miR-26a-5p/hsa-miR-26b-5p	hsa-miR-27a-3p	hsa-miR-29b-3p
SPOCK2	0.0227555	0.337829	0.306818	4	hsa-miR-142-5p	hsa-miR-200a-3p	hsa-miR-26a-5p/hsa-miR-26b-5p	hsa-miR-342-3p
SPSB4	0.0227555	0.337829	0.306818	4	hsa-miR-103a-3p/hsa-miR-107	hsa-miR-15b-5p/hsa-miR-15b-5p	hsa-miR-23a-3p/hsa-miR-23b-3p	hsa-miR-29b-3p
SYT10	0.0227555	0.337829	0.306818	4	hsa-miR-15b-5p/hsa-miR-15b-5p	hsa-miR-221-3p	hsa-miR-26a-5p/hsa-miR-26b-5p	hsa-miR-301a-3p
TAF9B	0.0227555	0.337829	0.306818	4	hsa-let-7a-5p/hsa-let-7e-5p/hsa-let-7f-5p/hsa-let-7g-5p/hsa-miR-98-5p	hsa-miR-181c-5p	hsa-miR-199a-5p	hsa-miR-26a-5p/hsa-miR-26b-5p
TBC1D8	0.0227555	0.337829	0.306818	4	hsa-miR-148a-3p	hsa-miR-199a-5p	hsa-miR-301a-3p	hsa-miR-338-3p
TMEM2	0.0227555	0.337829	0.306818	4	hsa-let-7a-5p/hsa-let-7e-5p/hsa-let-7f-5p/hsa-let-7g-5p/hsa-miR-98-5p	hsa-miR-132-3p/hsa-miR-212-3p	hsa-miR-23a-3p/hsa-miR-23b-3p	hsa-miR-26a-5p/hsa-miR-26b-5p
VAV2	0.0227555	0.337829	0.306818	4	hsa-miR-148a-3p	hsa-miR-15b-5p/hsa-miR-15b-5p	hsa-miR-27a-3p	hsa-miR-301a-3p
VWC2L	0.0227555	0.337829	0.306818	4	hsa-miR-103a-3p/hsa-miR-107	hsa-miR-15b-5p/hsa-miR-15b-5p	hsa-miR-200a-3p	hsa-miR-27a-3p
ZNF469	0.0227555	0.337829	0.306818	4	hsa-miR-15b-5p/hsa-miR-15b-5p	hsa-miR-23a-3p/hsa-miR-23b-3p	hsa-miR-26a-5p/hsa-miR-26b-5p	hsa-miR-29b-3p
ARID2	0.0237822	0.337829	0.518182	9	hsa-miR-103a-3p/hsa-miR-107	hsa-miR-132-3p/hsa-miR-212-3p	hsa-miR-142-5p	hsa-miR-154-3p	hsa-miR-181c-5p	hsa-miR-199a-5p	hsa-miR-26a-5p/hsa-miR-26b-5p	hsa-miR-27a-3p	hsa-miR-532-5p
CLCN5	0.0237822	0.337829	0.518182	9	hsa-let-7a-5p/hsa-let-7e-5p/hsa-let-7f-5p/hsa-let-7g-5p/hsa-miR-98-5p	hsa-miR-103a-3p/hsa-miR-107	hsa-miR-142-5p	hsa-miR-15b-5p/hsa-miR-15b-5p	hsa-miR-193a-3p/hsa-miR-193b-3p	hsa-miR-200a-3p	hsa-miR-27a-3p	hsa-miR-29b-3p	hsa-miR-301a-3p
HIPK2	0.0238151	0.337829	0.593182	12	hsa-let-7a-5p/hsa-let-7e-5p/hsa-let-7f-5p/hsa-let-7g-5p/hsa-miR-98-5p	hsa-miR-103a-3p/hsa-miR-107	hsa-miR-142-5p	hsa-miR-143-3p	hsa-miR-15b-5p/hsa-miR-15b-5p	hsa-miR-181c-5p	hsa-miR-200a-3p	hsa-miR-221-3p	hsa-miR-23a-3p/hsa-miR-23b-3p	hsa-miR-26a-5p/hsa-miR-26b-5p	hsa-miR-27a-3p	hsa-miR-433-3p
STRN	0.0238151	0.337829	0.593182	12	hsa-let-7a-5p/hsa-let-7e-5p/hsa-let-7f-5p/hsa-let-7g-5p/hsa-miR-98-5p	hsa-miR-103a-3p/hsa-miR-107	hsa-miR-15b-5p/hsa-miR-15b-5p	hsa-miR-181c-5p	hsa-miR-199a-5p	hsa-miR-200a-3p	hsa-miR-23a-3p/hsa-miR-23b-3p	hsa-miR-27a-3p	hsa-miR-29b-3p	hsa-miR-342-3p	hsa-miR-433-3p	hsa-miR-502-3p
A1CF	0.0241296	0.337829	0.368182	5	hsa-let-7a-5p/hsa-let-7e-5p/hsa-let-7f-5p/hsa-let-7g-5p/hsa-miR-98-5p	hsa-miR-143-3p	hsa-miR-15b-5p/hsa-miR-15b-5p	hsa-miR-26a-5p/hsa-miR-26b-5p	hsa-miR-27a-3p
ACER3	0.0241296	0.337829	0.368182	5	hsa-let-7a-5p/hsa-let-7e-5p/hsa-let-7f-5p/hsa-let-7g-5p/hsa-miR-98-5p	hsa-miR-103a-3p/hsa-miR-107	hsa-miR-181c-5p	hsa-miR-22-3p	hsa-miR-26a-5p/hsa-miR-26b-5p
ADAMTSL3	0.0241296	0.337829	0.368182	5	hsa-miR-103a-3p/hsa-miR-107	hsa-miR-15b-5p/hsa-miR-15b-5p	hsa-miR-193a-3p/hsa-miR-193b-3p	hsa-miR-199a-5p	hsa-miR-27a-3p
AKAP13	0.0241296	0.337829	0.368182	5	hsa-miR-103a-3p/hsa-miR-107	hsa-miR-143-3p	hsa-miR-199a-5p	hsa-miR-221-3p	hsa-miR-29b-3p
BAK1	0.0241296	0.337829	0.368182	5	hsa-miR-103a-3p/hsa-miR-107	hsa-miR-193a-3p/hsa-miR-193b-3p	hsa-miR-26a-5p/hsa-miR-26b-5p	hsa-miR-27a-3p	hsa-miR-29b-3p
DNAJC16	0.0241296	0.337829	0.368182	5	hsa-miR-148a-3p	hsa-miR-15b-5p/hsa-miR-15b-5p	hsa-miR-193a-3p/hsa-miR-193b-3p	hsa-miR-22-3p	hsa-miR-301a-3p
KIAA0226	0.0241296	0.337829	0.368182	5	hsa-miR-148a-3p	hsa-miR-15b-5p/hsa-miR-15b-5p	hsa-miR-181c-5p	hsa-miR-199a-5p	hsa-miR-22-3p
LMX1A	0.0241296	0.337829	0.368182	5	hsa-let-7a-5p/hsa-let-7e-5p/hsa-let-7f-5p/hsa-let-7g-5p/hsa-miR-98-5p	hsa-miR-142-5p	hsa-miR-29b-3p	hsa-miR-342-3p	hsa-miR-502-3p
NSG1	0.0241296	0.337829	0.368182	5	hsa-miR-103a-3p/hsa-miR-107	hsa-miR-142-5p	hsa-miR-15b-5p/hsa-miR-15b-5p	hsa-miR-181c-5p	hsa-miR-199a-5p
OSBPL6	0.0241296	0.337829	0.368182	5	hsa-miR-103a-3p/hsa-miR-107	hsa-miR-142-5p	hsa-miR-200a-3p	hsa-miR-29b-3p	hsa-miR-301a-3p
PODXL	0.0241296	0.337829	0.368182	5	hsa-miR-143-3p	hsa-miR-148a-3p	hsa-miR-15b-5p/hsa-miR-15b-5p	hsa-miR-181c-5p	hsa-miR-199a-5p
SUB1	0.0241296	0.337829	0.368182	5	hsa-let-7a-5p/hsa-let-7e-5p/hsa-let-7f-5p/hsa-let-7g-5p/hsa-miR-98-5p	hsa-miR-142-5p	hsa-miR-27a-3p	hsa-miR-29b-3p	hsa-miR-301a-3p
TANC1	0.0241296	0.337829	0.368182	5	hsa-miR-142-5p	hsa-miR-148a-3p	hsa-miR-29b-3p	hsa-miR-301a-3p	hsa-miR-338-3p
TMED5	0.0241296	0.337829	0.368182	5	hsa-let-7a-5p/hsa-let-7e-5p/hsa-let-7f-5p/hsa-let-7g-5p/hsa-miR-98-5p	hsa-miR-132-3p/hsa-miR-212-3p	hsa-miR-23a-3p/hsa-miR-23b-3p	hsa-miR-27a-3p	hsa-miR-433-3p
ZNF641	0.0241296	0.337829	0.368182	5	hsa-let-7a-5p/hsa-let-7e-5p/hsa-let-7f-5p/hsa-let-7g-5p/hsa-miR-98-5p	hsa-miR-199a-5p	hsa-miR-200a-3p	hsa-miR-29b-3p	hsa-miR-342-3p
ATAD2B	0.0245141	0.337829	0.455844	7	hsa-let-7a-5p/hsa-let-7e-5p/hsa-let-7f-5p/hsa-let-7g-5p/hsa-miR-98-5p	hsa-miR-103a-3p/hsa-miR-107	hsa-miR-200a-3p	hsa-miR-221-3p	hsa-miR-26a-5p/hsa-miR-26b-5p	hsa-miR-27a-3p	hsa-miR-29b-3p
C6orf62	0.0245141	0.337829	0.455844	7	hsa-miR-103a-3p/hsa-miR-107	hsa-miR-142-5p	hsa-miR-143-3p	hsa-miR-148a-3p	hsa-miR-181c-5p	hsa-miR-22-3p	hsa-miR-23a-3p/hsa-miR-23b-3p
CLCN3	0.0245141	0.337829	0.455844	7	hsa-miR-148a-3p	hsa-miR-15b-5p/hsa-miR-15b-5p	hsa-miR-199a-5p	hsa-miR-23a-3p/hsa-miR-23b-3p	hsa-miR-27a-3p	hsa-miR-301a-3p	hsa-miR-433-3p
HS2ST1	0.0245141	0.337829	0.455844	7	hsa-let-7a-5p/hsa-let-7e-5p/hsa-let-7f-5p/hsa-let-7g-5p/hsa-miR-98-5p	hsa-miR-133b	hsa-miR-142-5p	hsa-miR-181c-5p	hsa-miR-200a-3p	hsa-miR-26a-5p/hsa-miR-26b-5p	hsa-miR-27a-3p
NPEPPS	0.0245141	0.337829	0.455844	7	hsa-miR-154-3p	hsa-miR-15b-5p/hsa-miR-15b-5p	hsa-miR-181c-5p	hsa-miR-23a-3p/hsa-miR-23b-3p	hsa-miR-27a-3p	hsa-miR-342-3p	hsa-miR-502-3p
ZBTB43	0.0245141	0.337829	0.455844	7	hsa-miR-142-5p	hsa-miR-15b-5p/hsa-miR-15b-5p	hsa-miR-181c-5p	hsa-miR-23a-3p/hsa-miR-23b-3p	hsa-miR-29b-3p	hsa-miR-338-3p	hsa-miR-502-3p
BAZ2A	0.0247399	0.337829	0.490909	8	hsa-miR-103a-3p/hsa-miR-107	hsa-miR-133b	hsa-miR-142-5p	hsa-miR-148a-3p	hsa-miR-15b-5p/hsa-miR-15b-5p	hsa-miR-181c-5p	hsa-miR-193a-3p/hsa-miR-193b-3p	hsa-miR-301a-3p
GSK3B	0.0247399	0.337829	0.490909	8	hsa-miR-132-3p/hsa-miR-212-3p	hsa-miR-142-5p	hsa-miR-15b-5p/hsa-miR-15b-5p	hsa-miR-199a-5p	hsa-miR-23a-3p/hsa-miR-23b-3p	hsa-miR-26a-5p/hsa-miR-26b-5p	hsa-miR-27a-3p	hsa-miR-29b-3p
NUCKS1	0.0247399	0.337829	0.490909	8	hsa-miR-142-5p	hsa-miR-15b-5p/hsa-miR-15b-5p	hsa-miR-181c-5p	hsa-miR-200a-3p	hsa-miR-23a-3p/hsa-miR-23b-3p	hsa-miR-29b-3p	hsa-miR-342-3p	hsa-miR-433-3p
ATP6V1B2	0.0257905	0.337829	0.245455	3	hsa-miR-15b-5p/hsa-miR-15b-5p	hsa-miR-200a-3p	hsa-miR-23a-3p/hsa-miR-23b-3p
C2CD5	0.0257905	0.337829	0.245455	3	hsa-miR-103a-3p/hsa-miR-107	hsa-miR-181c-5p	hsa-miR-26a-5p/hsa-miR-26b-5p
CASP10	0.0257905	0.337829	0.245455	3	hsa-miR-181c-5p	hsa-miR-221-3p	hsa-miR-22-3p
CEP55	0.0257905	0.337829	0.245455	3	hsa-miR-148a-3p	hsa-miR-15b-5p/hsa-miR-15b-5p	hsa-miR-301a-3p
CHKA	0.0257905	0.337829	0.245455	3	hsa-miR-154-3p	hsa-miR-200a-3p	hsa-miR-27a-3p
CHST3	0.0257905	0.337829	0.245455	3	hsa-let-7a-5p/hsa-let-7e-5p/hsa-let-7f-5p/hsa-let-7g-5p/hsa-miR-98-5p	hsa-miR-23a-3p/hsa-miR-23b-3p	hsa-miR-26a-5p/hsa-miR-26b-5p
CLDN12	0.0257905	0.337829	0.245455	3	hsa-let-7a-5p/hsa-let-7e-5p/hsa-let-7f-5p/hsa-let-7g-5p/hsa-miR-98-5p	hsa-miR-15b-5p/hsa-miR-15b-5p	hsa-miR-23a-3p/hsa-miR-23b-3p
CYCS	0.0257905	0.337829	0.245455	3	hsa-miR-29b-3p	hsa-miR-433-3p	hsa-miR-532-5p
FAM58A	0.0257905	0.337829	0.245455	3	hsa-miR-15b-5p/hsa-miR-15b-5p	hsa-miR-181c-5p	hsa-miR-338-3p
FBXO46	0.0257905	0.337829	0.245455	3	hsa-miR-143-3p	hsa-miR-22-3p	hsa-miR-27a-3p
FLJ00388	0.0257905	0.337829	0.245455	3	hsa-miR-221-3p	hsa-miR-27a-3p	hsa-miR-433-3p
GAS2L3	0.0257905	0.337829	0.245455	3	hsa-miR-15b-5p/hsa-miR-15b-5p	hsa-miR-23a-3p/hsa-miR-23b-3p	hsa-miR-29b-3p
GOLT1B	0.0257905	0.337829	0.245455	3	hsa-let-7a-5p/hsa-let-7e-5p/hsa-let-7f-5p/hsa-let-7g-5p/hsa-miR-98-5p	hsa-miR-15b-5p/hsa-miR-15b-5p	hsa-miR-301a-3p
HSPA8	0.0257905	0.337829	0.245455	3	hsa-miR-142-5p	hsa-miR-26a-5p/hsa-miR-26b-5p	hsa-miR-301a-3p
KIAA1109	0.0257905	0.337829	0.245455	3	hsa-miR-199a-5p	hsa-miR-23a-3p/hsa-miR-23b-3p	hsa-miR-27a-3p
KIAA1211L	0.0257905	0.337829	0.245455	3	hsa-miR-132-3p/hsa-miR-212-3p	hsa-miR-22-3p	hsa-miR-27a-3p
KIAA1551	0.0257905	0.337829	0.245455	3	hsa-miR-181c-5p	hsa-miR-26a-5p/hsa-miR-26b-5p	hsa-miR-27a-3p
KIF21A	0.0257905	0.337829	0.245455	3	hsa-miR-103a-3p/hsa-miR-107	hsa-miR-133b	hsa-miR-15b-5p/hsa-miR-15b-5p
LMAN2	0.0257905	0.337829	0.245455	3	hsa-miR-15b-5p/hsa-miR-15b-5p	hsa-miR-199a-5p	hsa-miR-23a-3p/hsa-miR-23b-3p
LTBP1	0.0257905	0.337829	0.245455	3	hsa-miR-133b	hsa-miR-148a-3p	hsa-miR-26a-5p/hsa-miR-26b-5p
MGAT4B	0.0257905	0.337829	0.245455	3	hsa-miR-142-5p	hsa-miR-199a-5p	hsa-miR-29b-3p
MOGS	0.0257905	0.337829	0.245455	3	hsa-miR-143-3p	hsa-miR-148a-3p	hsa-miR-23a-3p/hsa-miR-23b-3p
MRC2	0.0257905	0.337829	0.245455	3	hsa-miR-133b	hsa-miR-143-3p	hsa-miR-23a-3p/hsa-miR-23b-3p
MSMO1	0.0257905	0.337829	0.245455	3	hsa-miR-23a-3p/hsa-miR-23b-3p	hsa-miR-26a-5p/hsa-miR-26b-5p	hsa-miR-301a-3p
OAF	0.0257905	0.337829	0.245455	3	hsa-miR-103a-3p/hsa-miR-107	hsa-miR-26a-5p/hsa-miR-26b-5p	hsa-miR-27a-3p
ORMDL1	0.0257905	0.337829	0.245455	3	hsa-miR-148a-3p	hsa-miR-154-3p	hsa-miR-23a-3p/hsa-miR-23b-3p
POGLUT1	0.0257905	0.337829	0.245455	3	hsa-let-7a-5p/hsa-let-7e-5p/hsa-let-7f-5p/hsa-let-7g-5p/hsa-miR-98-5p	hsa-miR-103a-3p/hsa-miR-107	hsa-miR-27a-3p
PRPF38A	0.0257905	0.337829	0.245455	3	hsa-miR-133b	hsa-miR-15b-5p/hsa-miR-15b-5p	hsa-miR-22-3p
PRR5L	0.0257905	0.337829	0.245455	3	hsa-miR-148a-3p	hsa-miR-26a-5p/hsa-miR-26b-5p	hsa-miR-301a-3p
RBM12B	0.0257905	0.337829	0.245455	3	hsa-miR-23a-3p/hsa-miR-23b-3p	hsa-miR-26a-5p/hsa-miR-26b-5p	hsa-miR-27a-3p
RLF	0.0257905	0.337829	0.245455	3	hsa-miR-181c-5p	hsa-miR-26a-5p/hsa-miR-26b-5p	hsa-miR-29b-3p
RNPEPL1	0.0257905	0.337829	0.245455	3	hsa-miR-148a-3p	hsa-miR-29b-3p	hsa-miR-301a-3p
RPUSD1	0.0257905	0.337829	0.245455	3	hsa-miR-103a-3p/hsa-miR-107	hsa-miR-148a-3p	hsa-miR-338-3p
SH3GL2	0.0257905	0.337829	0.245455	3	hsa-miR-103a-3p/hsa-miR-107	hsa-miR-133b	hsa-miR-15b-5p/hsa-miR-15b-5p
SLC20A1	0.0257905	0.337829	0.245455	3	hsa-let-7a-5p/hsa-let-7e-5p/hsa-let-7f-5p/hsa-let-7g-5p/hsa-miR-98-5p	hsa-miR-200a-3p	hsa-miR-27a-3p
SMIM17	0.0257905	0.337829	0.245455	3	hsa-miR-148a-3p	hsa-miR-27a-3p	hsa-miR-29b-3p
SOWAHA	0.0257905	0.337829	0.245455	3	hsa-let-7a-5p/hsa-let-7e-5p/hsa-let-7f-5p/hsa-let-7g-5p/hsa-miR-98-5p	hsa-miR-181c-5p	hsa-miR-27a-3p
SYT3	0.0257905	0.337829	0.245455	3	hsa-miR-143-3p	hsa-miR-15b-5p/hsa-miR-15b-5p	hsa-miR-181c-5p
TFAP2C	0.0257905	0.337829	0.245455	3	hsa-miR-200a-3p	hsa-miR-26a-5p/hsa-miR-26b-5p	hsa-miR-29b-3p
TMEM63B	0.0257905	0.337829	0.245455	3	hsa-miR-148a-3p	hsa-miR-199a-5p	hsa-miR-301a-3p
TSPAN4	0.0257905	0.337829	0.245455	3	hsa-miR-200a-3p	hsa-miR-29b-3p	hsa-miR-502-3p
WNT3A	0.0257905	0.337829	0.245455	3	hsa-miR-103a-3p/hsa-miR-107	hsa-miR-15b-5p/hsa-miR-15b-5p	hsa-miR-27a-3p
CREBRF	0.0272168	0.354697	0.580165	11	hsa-miR-103a-3p/hsa-miR-107	hsa-miR-142-5p	hsa-miR-154-3p	hsa-miR-15b-5p/hsa-miR-15b-5p	hsa-miR-181c-5p	hsa-miR-193a-3p/hsa-miR-193b-3p	hsa-miR-199a-5p	hsa-miR-200a-3p	hsa-miR-26a-5p/hsa-miR-26b-5p	hsa-miR-27a-3p	hsa-miR-433-3p
FOXP2	0.0272168	0.354697	0.580165	11	hsa-let-7a-5p/hsa-let-7e-5p/hsa-let-7f-5p/hsa-let-7g-5p/hsa-miR-98-5p	hsa-miR-132-3p/hsa-miR-212-3p	hsa-miR-133b	hsa-miR-15b-5p/hsa-miR-15b-5p	hsa-miR-181c-5p	hsa-miR-200a-3p	hsa-miR-221-3p	hsa-miR-23a-3p/hsa-miR-23b-3p	hsa-miR-26a-5p/hsa-miR-26b-5p	hsa-miR-27a-3p	hsa-miR-338-3p
NOVA1	0.0272168	0.354697	0.580165	11	hsa-let-7a-5p/hsa-let-7e-5p/hsa-let-7f-5p/hsa-let-7g-5p/hsa-miR-98-5p	hsa-miR-103a-3p/hsa-miR-107	hsa-miR-132-3p/hsa-miR-212-3p	hsa-miR-143-3p	hsa-miR-148a-3p	hsa-miR-181c-5p	hsa-miR-193a-3p/hsa-miR-193b-3p	hsa-miR-221-3p	hsa-miR-26a-5p/hsa-miR-26b-5p	hsa-miR-27a-3p	hsa-miR-338-3p
GMFB	0.0283086	0.365527	0.531818	9	hsa-miR-132-3p/hsa-miR-212-3p	hsa-miR-148a-3p	hsa-miR-181c-5p	hsa-miR-193a-3p/hsa-miR-193b-3p	hsa-miR-23a-3p/hsa-miR-23b-3p	hsa-miR-26a-5p/hsa-miR-26b-5p	hsa-miR-29b-3p	hsa-miR-301a-3p	hsa-miR-338-3p
KIAA2022	0.0283086	0.365527	0.531818	9	hsa-let-7a-5p/hsa-let-7e-5p/hsa-let-7f-5p/hsa-let-7g-5p/hsa-miR-98-5p	hsa-miR-142-5p	hsa-miR-143-3p	hsa-miR-181c-5p	hsa-miR-200a-3p	hsa-miR-26a-5p/hsa-miR-26b-5p	hsa-miR-27a-3p	hsa-miR-29b-3p	hsa-miR-301a-3p
RBMS1	0.0283086	0.365527	0.531818	9	hsa-let-7a-5p/hsa-let-7e-5p/hsa-let-7f-5p/hsa-let-7g-5p/hsa-miR-98-5p	hsa-miR-133b	hsa-miR-142-5p	hsa-miR-154-3p	hsa-miR-15b-5p/hsa-miR-15b-5p	hsa-miR-193a-3p/hsa-miR-193b-3p	hsa-miR-200a-3p	hsa-miR-26a-5p/hsa-miR-26b-5p	hsa-miR-502-3p
DAB1	0.0287146	0.365527	0.429545	6	hsa-let-7a-5p/hsa-let-7e-5p/hsa-let-7f-5p/hsa-let-7g-5p/hsa-miR-98-5p	hsa-miR-132-3p/hsa-miR-212-3p	hsa-miR-142-5p	hsa-miR-15b-5p/hsa-miR-15b-5p	hsa-miR-200a-3p	hsa-miR-29b-3p
EYA3	0.0287146	0.365527	0.429545	6	hsa-miR-148a-3p	hsa-miR-181c-5p	hsa-miR-22-3p	hsa-miR-26a-5p/hsa-miR-26b-5p	hsa-miR-338-3p	hsa-miR-532-5p
HIVEP2	0.0287146	0.365527	0.429545	6	hsa-miR-133b	hsa-miR-142-5p	hsa-miR-23a-3p/hsa-miR-23b-3p	hsa-miR-27a-3p	hsa-miR-301a-3p	hsa-miR-338-3p
IPO5	0.0287146	0.365527	0.429545	6	hsa-miR-142-5p	hsa-miR-148a-3p	hsa-miR-181c-5p	hsa-miR-200a-3p	hsa-miR-23a-3p/hsa-miR-23b-3p	hsa-miR-342-3p
KCNC2	0.0287146	0.365527	0.429545	6	hsa-let-7a-5p/hsa-let-7e-5p/hsa-let-7f-5p/hsa-let-7g-5p/hsa-miR-98-5p	hsa-miR-15b-5p/hsa-miR-15b-5p	hsa-miR-181c-5p	hsa-miR-200a-3p	hsa-miR-27a-3p	hsa-miR-29b-3p
NAP1L1	0.0287146	0.365527	0.429545	6	hsa-let-7a-5p/hsa-let-7e-5p/hsa-let-7f-5p/hsa-let-7g-5p/hsa-miR-98-5p	hsa-miR-148a-3p	hsa-miR-200a-3p	hsa-miR-221-3p	hsa-miR-23a-3p/hsa-miR-23b-3p	hsa-miR-532-5p
NUS1	0.0287146	0.365527	0.429545	6	hsa-miR-133b	hsa-miR-181c-5p	hsa-miR-22-3p	hsa-miR-23a-3p/hsa-miR-23b-3p	hsa-miR-26a-5p/hsa-miR-26b-5p	hsa-miR-301a-3p
SNN	0.0287146	0.365527	0.429545	6	hsa-let-7a-5p/hsa-let-7e-5p/hsa-let-7f-5p/hsa-let-7g-5p/hsa-miR-98-5p	hsa-miR-148a-3p	hsa-miR-181c-5p	hsa-miR-199a-5p	hsa-miR-26a-5p/hsa-miR-26b-5p	hsa-miR-27a-3p
TRABD2B	0.0287146	0.365527	0.429545	6	hsa-miR-103a-3p/hsa-miR-107	hsa-miR-15b-5p/hsa-miR-15b-5p	hsa-miR-221-3p	hsa-miR-23a-3p/hsa-miR-23b-3p	hsa-miR-27a-3p	hsa-miR-433-3p
YIPF6	0.0287146	0.365527	0.429545	6	hsa-miR-132-3p/hsa-miR-212-3p	hsa-miR-15b-5p/hsa-miR-15b-5p	hsa-miR-181c-5p	hsa-miR-199a-5p	hsa-miR-23a-3p/hsa-miR-23b-3p	hsa-miR-532-5p
ZFYVE26	0.0287146	0.365527	0.429545	6	hsa-let-7a-5p/hsa-let-7e-5p/hsa-let-7f-5p/hsa-let-7g-5p/hsa-miR-98-5p	hsa-miR-142-5p	hsa-miR-148a-3p	hsa-miR-193a-3p/hsa-miR-193b-3p	hsa-miR-29b-3p	hsa-miR-301a-3p
KRAS	0.0298705	0.376848	0.50625	8	hsa-miR-143-3p	hsa-miR-15b-5p/hsa-miR-15b-5p	hsa-miR-181c-5p	hsa-miR-193a-3p/hsa-miR-193b-3p	hsa-miR-27a-3p	hsa-miR-433-3p	hsa-miR-502-3p	hsa-miR-532-5p
TACC1	0.0298705	0.376848	0.50625	8	hsa-miR-103a-3p/hsa-miR-107	hsa-miR-132-3p/hsa-miR-212-3p	hsa-miR-142-5p	hsa-miR-15b-5p/hsa-miR-15b-5p	hsa-miR-29b-3p	hsa-miR-301a-3p	hsa-miR-338-3p	hsa-miR-342-3p
AGO4	0.0302494	0.376848	0.473377	7	hsa-let-7a-5p/hsa-let-7e-5p/hsa-let-7f-5p/hsa-let-7g-5p/hsa-miR-98-5p	hsa-miR-103a-3p/hsa-miR-107	hsa-miR-148a-3p	hsa-miR-15b-5p/hsa-miR-15b-5p	hsa-miR-181c-5p	hsa-miR-221-3p	hsa-miR-301a-3p
EGR3	0.0302494	0.376848	0.473377	7	hsa-let-7a-5p/hsa-let-7e-5p/hsa-let-7f-5p/hsa-let-7g-5p/hsa-miR-98-5p	hsa-miR-142-5p	hsa-miR-148a-3p	hsa-miR-181c-5p	hsa-miR-23a-3p/hsa-miR-23b-3p	hsa-miR-27a-3p	hsa-miR-301a-3p
ESR1	0.0302494	0.376848	0.473377	7	hsa-miR-103a-3p/hsa-miR-107	hsa-miR-148a-3p	hsa-miR-181c-5p	hsa-miR-221-3p	hsa-miR-22-3p	hsa-miR-26a-5p/hsa-miR-26b-5p	hsa-miR-301a-3p
ROBO1	0.0302494	0.376848	0.473377	7	hsa-let-7a-5p/hsa-let-7e-5p/hsa-let-7f-5p/hsa-let-7g-5p/hsa-miR-98-5p	hsa-miR-142-5p	hsa-miR-148a-3p	hsa-miR-23a-3p/hsa-miR-23b-3p	hsa-miR-27a-3p	hsa-miR-29b-3p	hsa-miR-301a-3p
TXLNG	0.0302494	0.376848	0.473377	7	hsa-let-7a-5p/hsa-let-7e-5p/hsa-let-7f-5p/hsa-let-7g-5p/hsa-miR-98-5p	hsa-miR-148a-3p	hsa-miR-154-3p	hsa-miR-15b-5p/hsa-miR-15b-5p	hsa-miR-200a-3p	hsa-miR-23a-3p/hsa-miR-23b-3p	hsa-miR-27a-3p
ADAM12	0.0320784	0.376848	0.392727	5	hsa-miR-142-5p	hsa-miR-26a-5p/hsa-miR-26b-5p	hsa-miR-29b-3p	hsa-miR-301a-3p	hsa-miR-502-3p
B3GALT1	0.0320784	0.376848	0.392727	5	hsa-let-7a-5p/hsa-let-7e-5p/hsa-let-7f-5p/hsa-let-7g-5p/hsa-miR-98-5p	hsa-miR-15b-5p/hsa-miR-15b-5p	hsa-miR-181c-5p	hsa-miR-200a-3p	hsa-miR-29b-3p
GCNT4	0.0320784	0.376848	0.392727	5	hsa-let-7a-5p/hsa-let-7e-5p/hsa-let-7f-5p/hsa-let-7g-5p/hsa-miR-98-5p	hsa-miR-15b-5p/hsa-miR-15b-5p	hsa-miR-181c-5p	hsa-miR-200a-3p	hsa-miR-23a-3p/hsa-miR-23b-3p
KITLG	0.0320784	0.376848	0.392727	5	hsa-miR-132-3p/hsa-miR-212-3p	hsa-miR-142-5p	hsa-miR-181c-5p	hsa-miR-23a-3p/hsa-miR-23b-3p	hsa-miR-27a-3p
MN1	0.0320784	0.376848	0.392727	5	hsa-miR-15b-5p/hsa-miR-15b-5p	hsa-miR-199a-5p	hsa-miR-200a-3p	hsa-miR-27a-3p	hsa-miR-433-3p
MTMR9	0.0320784	0.376848	0.392727	5	hsa-miR-148a-3p	hsa-miR-181c-5p	hsa-miR-23a-3p/hsa-miR-23b-3p	hsa-miR-29b-3p	hsa-miR-301a-3p
PLA2G15	0.0320784	0.376848	0.392727	5	hsa-let-7a-5p/hsa-let-7e-5p/hsa-let-7f-5p/hsa-let-7g-5p/hsa-miR-98-5p	hsa-miR-148a-3p	hsa-miR-15b-5p/hsa-miR-15b-5p	hsa-miR-27a-3p	hsa-miR-338-3p
PNISR	0.0320784	0.376848	0.392727	5	hsa-miR-103a-3p/hsa-miR-107	hsa-miR-15b-5p/hsa-miR-15b-5p	hsa-miR-181c-5p	hsa-miR-22-3p	hsa-miR-27a-3p
RBM47	0.0320784	0.376848	0.392727	5	hsa-miR-181c-5p	hsa-miR-199a-5p	hsa-miR-200a-3p	hsa-miR-23a-3p/hsa-miR-23b-3p	hsa-miR-26a-5p/hsa-miR-26b-5p
SLC2A13	0.0320784	0.376848	0.392727	5	hsa-miR-103a-3p/hsa-miR-107	hsa-miR-142-5p	hsa-miR-15b-5p/hsa-miR-15b-5p	hsa-miR-221-3p	hsa-miR-26a-5p/hsa-miR-26b-5p
SS18L1	0.0320784	0.376848	0.392727	5	hsa-miR-181c-5p	hsa-miR-23a-3p/hsa-miR-23b-3p	hsa-miR-27a-3p	hsa-miR-29b-3p	hsa-miR-338-3p
TAB2	0.0320784	0.376848	0.392727	5	hsa-let-7a-5p/hsa-let-7e-5p/hsa-let-7f-5p/hsa-let-7g-5p/hsa-miR-98-5p	hsa-miR-200a-3p	hsa-miR-23a-3p/hsa-miR-23b-3p	hsa-miR-26a-5p/hsa-miR-26b-5p	hsa-miR-27a-3p
AK2	0.0327203	0.376848	0.3375	4	hsa-miR-103a-3p/hsa-miR-107	hsa-miR-133b	hsa-miR-22-3p	hsa-miR-27a-3p
AMOTL1	0.0327203	0.376848	0.3375	4	hsa-miR-143-3p	hsa-miR-15b-5p/hsa-miR-15b-5p	hsa-miR-200a-3p	hsa-miR-502-3p
CAV2	0.0327203	0.376848	0.3375	4	hsa-miR-142-5p	hsa-miR-148a-3p	hsa-miR-29b-3p	hsa-miR-301a-3p
CCDC85A	0.0327203	0.376848	0.3375	4	hsa-miR-148a-3p	hsa-miR-181c-5p	hsa-miR-29b-3p	hsa-miR-301a-3p
CMPK1	0.0327203	0.376848	0.3375	4	hsa-miR-133b	hsa-miR-15b-5p/hsa-miR-15b-5p	hsa-miR-29b-3p	hsa-miR-301a-3p
DEDD	0.0327203	0.376848	0.3375	4	hsa-miR-148a-3p	hsa-miR-15b-5p/hsa-miR-15b-5p	hsa-miR-29b-3p	hsa-miR-301a-3p
E2F6	0.0327203	0.376848	0.3375	4	hsa-let-7a-5p/hsa-let-7e-5p/hsa-let-7f-5p/hsa-let-7g-5p/hsa-miR-98-5p	hsa-miR-193a-3p/hsa-miR-193b-3p	hsa-miR-199a-5p	hsa-miR-27a-3p
FAM91A1	0.0327203	0.376848	0.3375	4	hsa-miR-132-3p/hsa-miR-212-3p	hsa-miR-142-5p	hsa-miR-15b-5p/hsa-miR-15b-5p	hsa-miR-200a-3p
FANCA	0.0327203	0.376848	0.3375	4	hsa-miR-148a-3p	hsa-miR-199a-5p	hsa-miR-26a-5p/hsa-miR-26b-5p	hsa-miR-301a-3p
FBXO48	0.0327203	0.376848	0.3375	4	hsa-miR-181c-5p	hsa-miR-27a-3p	hsa-miR-301a-3p	hsa-miR-433-3p
FHDC1	0.0327203	0.376848	0.3375	4	hsa-miR-15b-5p/hsa-miR-15b-5p	hsa-miR-181c-5p	hsa-miR-193a-3p/hsa-miR-193b-3p	hsa-miR-342-3p
GID8	0.0327203	0.376848	0.3375	4	hsa-miR-133b	hsa-miR-143-3p	hsa-miR-29b-3p	hsa-miR-342-3p
HMGA1	0.0327203	0.376848	0.3375	4	hsa-let-7a-5p/hsa-let-7e-5p/hsa-let-7f-5p/hsa-let-7g-5p/hsa-miR-98-5p	hsa-miR-103a-3p/hsa-miR-107	hsa-miR-15b-5p/hsa-miR-15b-5p	hsa-miR-26a-5p/hsa-miR-26b-5p
HSP90B1	0.0327203	0.376848	0.3375	4	hsa-miR-148a-3p	hsa-miR-181c-5p	hsa-miR-23a-3p/hsa-miR-23b-3p	hsa-miR-433-3p
IL17RD	0.0327203	0.376848	0.3375	4	hsa-miR-193a-3p/hsa-miR-193b-3p	hsa-miR-22-3p	hsa-miR-23a-3p/hsa-miR-23b-3p	hsa-miR-29b-3p
INTU	0.0327203	0.376848	0.3375	4	hsa-let-7a-5p/hsa-let-7e-5p/hsa-let-7f-5p/hsa-let-7g-5p/hsa-miR-98-5p	hsa-miR-142-5p	hsa-miR-23a-3p/hsa-miR-23b-3p	hsa-miR-26a-5p/hsa-miR-26b-5p
MPPED2	0.0327203	0.376848	0.3375	4	hsa-miR-142-5p	hsa-miR-148a-3p	hsa-miR-200a-3p	hsa-miR-301a-3p
PAIP2	0.0327203	0.376848	0.3375	4	hsa-miR-132-3p/hsa-miR-212-3p	hsa-miR-221-3p	hsa-miR-27a-3p	hsa-miR-29b-3p
PLAA	0.0327203	0.376848	0.3375	4	hsa-miR-148a-3p	hsa-miR-27a-3p	hsa-miR-301a-3p	hsa-miR-342-3p
SEL1L3	0.0327203	0.376848	0.3375	4	hsa-miR-103a-3p/hsa-miR-107	hsa-miR-142-5p	hsa-miR-15b-5p/hsa-miR-15b-5p	hsa-miR-301a-3p
SEPT8	0.0327203	0.376848	0.3375	4	hsa-miR-181c-5p	hsa-miR-200a-3p	hsa-miR-27a-3p	hsa-miR-338-3p
SIX5	0.0327203	0.376848	0.3375	4	hsa-miR-133b	hsa-miR-15b-5p/hsa-miR-15b-5p	hsa-miR-27a-3p	hsa-miR-29b-3p
SNX16	0.0327203	0.376848	0.3375	4	hsa-let-7a-5p/hsa-let-7e-5p/hsa-let-7f-5p/hsa-let-7g-5p/hsa-miR-98-5p	hsa-miR-142-5p	hsa-miR-15b-5p/hsa-miR-15b-5p	hsa-miR-532-5p
ST8SIA1	0.0327203	0.376848	0.3375	4	hsa-let-7a-5p/hsa-let-7e-5p/hsa-let-7f-5p/hsa-let-7g-5p/hsa-miR-98-5p	hsa-miR-221-3p	hsa-miR-23a-3p/hsa-miR-23b-3p	hsa-miR-27a-3p
STX3	0.0327203	0.376848	0.3375	4	hsa-let-7a-5p/hsa-let-7e-5p/hsa-let-7f-5p/hsa-let-7g-5p/hsa-miR-98-5p	hsa-miR-103a-3p/hsa-miR-107	hsa-miR-148a-3p	hsa-miR-433-3p
SYNJ1	0.0327203	0.376848	0.3375	4	hsa-miR-142-5p	hsa-miR-148a-3p	hsa-miR-15b-5p/hsa-miR-15b-5p	hsa-miR-23a-3p/hsa-miR-23b-3p
TMEM87B	0.0327203	0.376848	0.3375	4	hsa-miR-133b	hsa-miR-15b-5p/hsa-miR-15b-5p	hsa-miR-181c-5p	hsa-miR-23a-3p/hsa-miR-23b-3p
TRPC3	0.0327203	0.376848	0.3375	4	hsa-miR-142-5p	hsa-miR-221-3p	hsa-miR-26a-5p/hsa-miR-26b-5p	hsa-miR-301a-3p
TSPAN5	0.0327203	0.376848	0.3375	4	hsa-miR-103a-3p/hsa-miR-107	hsa-miR-15b-5p/hsa-miR-15b-5p	hsa-miR-199a-5p	hsa-miR-26a-5p/hsa-miR-26b-5p
ZNF629	0.0327203	0.376848	0.3375	4	hsa-miR-15b-5p/hsa-miR-15b-5p	hsa-miR-199a-5p	hsa-miR-200a-3p	hsa-miR-221-3p
CELF1	0.0334369	0.376848	0.545455	9	hsa-let-7a-5p/hsa-let-7e-5p/hsa-let-7f-5p/hsa-let-7g-5p/hsa-miR-98-5p	hsa-miR-133b	hsa-miR-200a-3p	hsa-miR-22-3p	hsa-miR-23a-3p/hsa-miR-23b-3p	hsa-miR-26a-5p/hsa-miR-26b-5p	hsa-miR-27a-3p	hsa-miR-342-3p	hsa-miR-433-3p
PTPN4	0.0334369	0.376848	0.545455	9	hsa-miR-103a-3p/hsa-miR-107	hsa-miR-142-5p	hsa-miR-143-3p	hsa-miR-15b-5p/hsa-miR-15b-5p	hsa-miR-181c-5p	hsa-miR-23a-3p/hsa-miR-23b-3p	hsa-miR-26a-5p/hsa-miR-26b-5p	hsa-miR-29b-3p	hsa-miR-301a-3p
SESTD1	0.0334369	0.376848	0.545455	9	hsa-let-7a-5p/hsa-let-7e-5p/hsa-let-7f-5p/hsa-let-7g-5p/hsa-miR-98-5p	hsa-miR-143-3p	hsa-miR-148a-3p	hsa-miR-15b-5p/hsa-miR-15b-5p	hsa-miR-29b-3p	hsa-miR-301a-3p	hsa-miR-342-3p	hsa-miR-433-3p	hsa-miR-532-5p
CCNT2	0.0354971	0.376848	0.576818	10	hsa-let-7a-5p/hsa-let-7e-5p/hsa-let-7f-5p/hsa-let-7g-5p/hsa-miR-98-5p	hsa-miR-142-5p	hsa-miR-154-3p	hsa-miR-15b-5p/hsa-miR-15b-5p	hsa-miR-200a-3p	hsa-miR-22-3p	hsa-miR-23a-3p/hsa-miR-23b-3p	hsa-miR-29b-3p	hsa-miR-338-3p	hsa-miR-342-3p
TNPO1	0.0354971	0.376848	0.576818	10	hsa-miR-103a-3p/hsa-miR-107	hsa-miR-148a-3p	hsa-miR-154-3p	hsa-miR-15b-5p/hsa-miR-15b-5p	hsa-miR-181c-5p	hsa-miR-200a-3p	hsa-miR-23a-3p/hsa-miR-23b-3p	hsa-miR-26a-5p/hsa-miR-26b-5p	hsa-miR-27a-3p	hsa-miR-301a-3p
CHIC1	0.0357208	0.376848	0.521591	8	hsa-let-7a-5p/hsa-let-7e-5p/hsa-let-7f-5p/hsa-let-7g-5p/hsa-miR-98-5p	hsa-miR-103a-3p/hsa-miR-107	hsa-miR-142-5p	hsa-miR-15b-5p/hsa-miR-15b-5p	hsa-miR-181c-5p	hsa-miR-26a-5p/hsa-miR-26b-5p	hsa-miR-27a-3p	hsa-miR-301a-3p
MITF	0.0357208	0.376848	0.521591	8	hsa-miR-132-3p/hsa-miR-212-3p	hsa-miR-142-5p	hsa-miR-148a-3p	hsa-miR-181c-5p	hsa-miR-221-3p	hsa-miR-23a-3p/hsa-miR-23b-3p	hsa-miR-26a-5p/hsa-miR-26b-5p	hsa-miR-27a-3p
TET2	0.0357208	0.376848	0.521591	8	hsa-let-7a-5p/hsa-let-7e-5p/hsa-let-7f-5p/hsa-let-7g-5p/hsa-miR-98-5p	hsa-miR-143-3p	hsa-miR-148a-3p	hsa-miR-199a-5p	hsa-miR-22-3p	hsa-miR-23a-3p/hsa-miR-23b-3p	hsa-miR-26a-5p/hsa-miR-26b-5p	hsa-miR-29b-3p
TRAF3	0.0357208	0.376848	0.521591	8	hsa-miR-103a-3p/hsa-miR-107	hsa-miR-133b	hsa-miR-15b-5p/hsa-miR-15b-5p	hsa-miR-199a-5p	hsa-miR-26a-5p/hsa-miR-26b-5p	hsa-miR-27a-3p	hsa-miR-29b-3p	hsa-miR-338-3p
ZADH2	0.0357208	0.376848	0.521591	8	hsa-miR-142-5p	hsa-miR-148a-3p	hsa-miR-15b-5p/hsa-miR-15b-5p	hsa-miR-181c-5p	hsa-miR-221-3p	hsa-miR-27a-3p	hsa-miR-301a-3p	hsa-miR-338-3p
CACNA2D1	0.0360745	0.376848	0.45	6	hsa-miR-103a-3p/hsa-miR-107	hsa-miR-15b-5p/hsa-miR-15b-5p	hsa-miR-181c-5p	hsa-miR-200a-3p	hsa-miR-26a-5p/hsa-miR-26b-5p	hsa-miR-338-3p
FAM178A	0.0360745	0.376848	0.45	6	hsa-let-7a-5p/hsa-let-7e-5p/hsa-let-7f-5p/hsa-let-7g-5p/hsa-miR-98-5p	hsa-miR-148a-3p	hsa-miR-181c-5p	hsa-miR-193a-3p/hsa-miR-193b-3p	hsa-miR-199a-5p	hsa-miR-301a-3p
MLLT6	0.0360745	0.376848	0.45	6	hsa-miR-148a-3p	hsa-miR-15b-5p/hsa-miR-15b-5p	hsa-miR-221-3p	hsa-miR-301a-3p	hsa-miR-342-3p	hsa-miR-502-3p
PTBP3	0.0360745	0.376848	0.45	6	hsa-miR-133b	hsa-miR-143-3p	hsa-miR-181c-5p	hsa-miR-221-3p	hsa-miR-26a-5p/hsa-miR-26b-5p	hsa-miR-29b-3p
ST8SIA3	0.0360745	0.376848	0.45	6	hsa-miR-103a-3p/hsa-miR-107	hsa-miR-133b	hsa-miR-148a-3p	hsa-miR-15b-5p/hsa-miR-15b-5p	hsa-miR-181c-5p	hsa-miR-301a-3p
USP37	0.0360745	0.376848	0.45	6	hsa-miR-148a-3p	hsa-miR-199a-5p	hsa-miR-22-3p	hsa-miR-26a-5p/hsa-miR-26b-5p	hsa-miR-29b-3p	hsa-miR-502-3p
YTHDC1	0.0360745	0.376848	0.45	6	hsa-miR-103a-3p/hsa-miR-107	hsa-miR-154-3p	hsa-miR-15b-5p/hsa-miR-15b-5p	hsa-miR-181c-5p	hsa-miR-200a-3p	hsa-miR-221-3p
ARHGEF12	0.0368593	0.376848	0.490909	7	hsa-miR-142-5p	hsa-miR-148a-3p	hsa-miR-193a-3p/hsa-miR-193b-3p	hsa-miR-199a-5p	hsa-miR-22-3p	hsa-miR-26a-5p/hsa-miR-26b-5p	hsa-miR-301a-3p
AGFG1	0.0392062	0.376848	0.559091	9	hsa-miR-103a-3p/hsa-miR-107	hsa-miR-148a-3p	hsa-miR-181c-5p	hsa-miR-200a-3p	hsa-miR-221-3p	hsa-miR-27a-3p	hsa-miR-301a-3p	hsa-miR-342-3p	hsa-miR-502-3p
ABCF1	0.0403693	0.376848	0.184091	2	hsa-miR-103a-3p/hsa-miR-107	hsa-miR-15b-5p/hsa-miR-15b-5p
ACTA2	0.0403693	0.376848	0.184091	2	hsa-miR-181c-5p	hsa-miR-27a-3p
ACTR2	0.0403693	0.376848	0.184091	2	hsa-miR-15b-5p/hsa-miR-15b-5p	hsa-miR-338-3p
ADRB2	0.0403693	0.376848	0.184091	2	hsa-let-7a-5p/hsa-let-7e-5p/hsa-let-7f-5p/hsa-let-7g-5p/hsa-miR-98-5p	hsa-miR-15b-5p/hsa-miR-15b-5p
AL355390.1	0.0403693	0.376848	0.184091	2	hsa-miR-26a-5p/hsa-miR-26b-5p	hsa-miR-27a-3p
ALAS1	0.0403693	0.376848	0.184091	2	hsa-miR-142-5p	hsa-miR-23a-3p/hsa-miR-23b-3p
ALDH1L1	0.0403693	0.376848	0.184091	2	hsa-miR-143-3p	hsa-miR-433-3p
ANKRD34C	0.0403693	0.376848	0.184091	2	hsa-miR-132-3p/hsa-miR-212-3p	hsa-miR-26a-5p/hsa-miR-26b-5p
ARPC1B	0.0403693	0.376848	0.184091	2	hsa-miR-338-3p	hsa-miR-433-3p
ATF7IP2	0.0403693	0.376848	0.184091	2	hsa-miR-142-5p	hsa-miR-15b-5p/hsa-miR-15b-5p
ATP10B	0.0403693	0.376848	0.184091	2	hsa-miR-15b-5p/hsa-miR-15b-5p	hsa-miR-27a-3p
ATXN7L2	0.0403693	0.376848	0.184091	2	hsa-miR-142-5p	hsa-miR-15b-5p/hsa-miR-15b-5p
B3GNT2	0.0403693	0.376848	0.184091	2	hsa-miR-133b	hsa-miR-200a-3p
B4GALT3	0.0403693	0.376848	0.184091	2	hsa-miR-27a-3p	hsa-miR-433-3p
BAAT	0.0403693	0.376848	0.184091	2	hsa-miR-181c-5p	hsa-miR-199a-5p
BCL7B	0.0403693	0.376848	0.184091	2	hsa-miR-148a-3p	hsa-miR-26a-5p/hsa-miR-26b-5p
C15orf27	0.0403693	0.376848	0.184091	2	hsa-miR-148a-3p	hsa-miR-27a-3p
C19orf47	0.0403693	0.376848	0.184091	2	hsa-let-7a-5p/hsa-let-7e-5p/hsa-let-7f-5p/hsa-let-7g-5p/hsa-miR-98-5p	hsa-miR-132-3p/hsa-miR-212-3p
C6orf195	0.0403693	0.376848	0.184091	2	hsa-miR-193a-3p/hsa-miR-193b-3p	hsa-miR-338-3p
C6orf222	0.0403693	0.376848	0.184091	2	hsa-miR-148a-3p	hsa-miR-338-3p
C6orf57	0.0403693	0.376848	0.184091	2	hsa-miR-103a-3p/hsa-miR-107	hsa-miR-15b-5p/hsa-miR-15b-5p
CCDC82	0.0403693	0.376848	0.184091	2	hsa-miR-23a-3p/hsa-miR-23b-3p	hsa-miR-433-3p
CCNE1	0.0403693	0.376848	0.184091	2	hsa-miR-103a-3p/hsa-miR-107	hsa-miR-15b-5p/hsa-miR-15b-5p
CDCA8	0.0403693	0.376848	0.184091	2	hsa-let-7a-5p/hsa-let-7e-5p/hsa-let-7f-5p/hsa-let-7g-5p/hsa-miR-98-5p	hsa-miR-133b
CENPBD1	0.0403693	0.376848	0.184091	2	hsa-miR-103a-3p/hsa-miR-107	hsa-miR-15b-5p/hsa-miR-15b-5p
CERS1	0.0403693	0.376848	0.184091	2	hsa-miR-15b-5p/hsa-miR-15b-5p	hsa-miR-29b-3p
CHAC1	0.0403693	0.376848	0.184091	2	hsa-miR-15b-5p/hsa-miR-15b-5p	hsa-miR-26a-5p/hsa-miR-26b-5p
CHEK2	0.0403693	0.376848	0.184091	2	hsa-miR-143-3p	hsa-miR-338-3p
CLK2	0.0403693	0.376848	0.184091	2	hsa-miR-199a-5p	hsa-miR-29b-3p
COL15A1	0.0403693	0.376848	0.184091	2	hsa-let-7a-5p/hsa-let-7e-5p/hsa-let-7f-5p/hsa-let-7g-5p/hsa-miR-98-5p	hsa-miR-29b-3p
COL16A1	0.0403693	0.376848	0.184091	2	hsa-miR-181c-5p	hsa-miR-29b-3p
CTB-54O9.9	0.0403693	0.376848	0.184091	2	hsa-let-7a-5p/hsa-let-7e-5p/hsa-let-7f-5p/hsa-let-7g-5p/hsa-miR-98-5p	hsa-miR-193a-3p/hsa-miR-193b-3p
CX3CL1	0.0403693	0.376848	0.184091	2	hsa-miR-15b-5p/hsa-miR-15b-5p	hsa-miR-29b-3p
DIAPH3	0.0403693	0.376848	0.184091	2	hsa-miR-142-5p	hsa-miR-301a-3p
DMTN	0.0403693	0.376848	0.184091	2	hsa-miR-181c-5p	hsa-miR-338-3p
DUSP9	0.0403693	0.376848	0.184091	2	hsa-let-7a-5p/hsa-let-7e-5p/hsa-let-7f-5p/hsa-let-7g-5p/hsa-miR-98-5p	hsa-miR-132-3p/hsa-miR-212-3p
FAM184A	0.0403693	0.376848	0.184091	2	hsa-miR-148a-3p	hsa-miR-27a-3p
FBXL13	0.0403693	0.376848	0.184091	2	hsa-miR-22-3p	hsa-miR-433-3p
FKBP1C	0.0403693	0.376848	0.184091	2	hsa-miR-15b-5p/hsa-miR-15b-5p	hsa-miR-338-3p
FKRP	0.0403693	0.376848	0.184091	2	hsa-let-7a-5p/hsa-let-7e-5p/hsa-let-7f-5p/hsa-let-7g-5p/hsa-miR-98-5p	hsa-miR-15b-5p/hsa-miR-15b-5p
GADD45A	0.0403693	0.376848	0.184091	2	hsa-miR-148a-3p	hsa-miR-301a-3p
GLUD1	0.0403693	0.376848	0.184091	2	hsa-miR-103a-3p/hsa-miR-107	hsa-miR-15b-5p/hsa-miR-15b-5p
GNG5	0.0403693	0.376848	0.184091	2	hsa-let-7a-5p/hsa-let-7e-5p/hsa-let-7f-5p/hsa-let-7g-5p/hsa-miR-98-5p	hsa-miR-199a-5p
GPR146	0.0403693	0.376848	0.184091	2	hsa-miR-193a-3p/hsa-miR-193b-3p	hsa-miR-26a-5p/hsa-miR-26b-5p
HINT3	0.0403693	0.376848	0.184091	2	hsa-miR-181c-5p	hsa-miR-433-3p
HMCN1	0.0403693	0.376848	0.184091	2	hsa-miR-199a-5p	hsa-miR-29b-3p
HTR4	0.0403693	0.376848	0.184091	2	hsa-let-7a-5p/hsa-let-7e-5p/hsa-let-7f-5p/hsa-let-7g-5p/hsa-miR-98-5p	hsa-miR-15b-5p/hsa-miR-15b-5p
IARS2	0.0403693	0.376848	0.184091	2	hsa-miR-181c-5p	hsa-miR-532-5p
IL15	0.0403693	0.376848	0.184091	2	hsa-miR-148a-3p	hsa-miR-301a-3p
INPP5J	0.0403693	0.376848	0.184091	2	hsa-miR-15b-5p/hsa-miR-15b-5p	hsa-miR-27a-3p
ISLR	0.0403693	0.376848	0.184091	2	hsa-let-7a-5p/hsa-let-7e-5p/hsa-let-7f-5p/hsa-let-7g-5p/hsa-miR-98-5p	hsa-miR-15b-5p/hsa-miR-15b-5p
KLHDC2	0.0403693	0.376848	0.184091	2	hsa-miR-200a-3p	hsa-miR-23a-3p/hsa-miR-23b-3p
KLHDC8B	0.0403693	0.376848	0.184091	2	hsa-let-7a-5p/hsa-let-7e-5p/hsa-let-7f-5p/hsa-let-7g-5p/hsa-miR-98-5p	hsa-miR-15b-5p/hsa-miR-15b-5p
LHPP	0.0403693	0.376848	0.184091	2	hsa-miR-103a-3p/hsa-miR-107	hsa-miR-15b-5p/hsa-miR-15b-5p
LRBA	0.0403693	0.376848	0.184091	2	hsa-miR-181c-5p	hsa-miR-27a-3p
MAPKAPK3	0.0403693	0.376848	0.184091	2	hsa-miR-27a-3p	hsa-miR-532-5p
MLIP	0.0403693	0.376848	0.184091	2	hsa-miR-29b-3p	hsa-miR-338-3p
NGRN	0.0403693	0.376848	0.184091	2	hsa-miR-221-3p	hsa-miR-29b-3p
NSMCE4A	0.0403693	0.376848	0.184091	2	hsa-miR-154-3p	hsa-miR-221-3p
OLR1	0.0403693	0.376848	0.184091	2	hsa-let-7a-5p/hsa-let-7e-5p/hsa-let-7f-5p/hsa-let-7g-5p/hsa-miR-98-5p	hsa-miR-502-3p
OXA1L	0.0403693	0.376848	0.184091	2	hsa-miR-15b-5p/hsa-miR-15b-5p	hsa-miR-221-3p
OXTR	0.0403693	0.376848	0.184091	2	hsa-miR-23a-3p/hsa-miR-23b-3p	hsa-miR-29b-3p
PALM3	0.0403693	0.376848	0.184091	2	hsa-let-7a-5p/hsa-let-7e-5p/hsa-let-7f-5p/hsa-let-7g-5p/hsa-miR-98-5p	hsa-miR-26a-5p/hsa-miR-26b-5p
PCM1	0.0403693	0.376848	0.184091	2	hsa-miR-15b-5p/hsa-miR-15b-5p	hsa-miR-200a-3p
PLAU	0.0403693	0.376848	0.184091	2	hsa-miR-181c-5p	hsa-miR-193a-3p/hsa-miR-193b-3p
PLBD2	0.0403693	0.376848	0.184091	2	hsa-miR-22-3p	hsa-miR-26a-5p/hsa-miR-26b-5p
PLCD1	0.0403693	0.376848	0.184091	2	hsa-miR-15b-5p/hsa-miR-15b-5p	hsa-miR-191-5p
PLEK	0.0403693	0.376848	0.184091	2	hsa-miR-181c-5p	hsa-miR-200a-3p
PLEKHG7	0.0403693	0.376848	0.184091	2	hsa-let-7a-5p/hsa-let-7e-5p/hsa-let-7f-5p/hsa-let-7g-5p/hsa-miR-98-5p	hsa-miR-142-5p
POLE3	0.0403693	0.376848	0.184091	2	hsa-miR-132-3p/hsa-miR-212-3p	hsa-miR-29b-3p
POLR3A	0.0403693	0.376848	0.184091	2	hsa-miR-200a-3p	hsa-miR-338-3p
PPARG	0.0403693	0.376848	0.184091	2	hsa-miR-27a-3p	hsa-miR-301a-3p
PPP2R2B	0.0403693	0.376848	0.184091	2	hsa-miR-200a-3p	hsa-miR-26a-5p/hsa-miR-26b-5p
PRR15	0.0403693	0.376848	0.184091	2	hsa-miR-148a-3p	hsa-miR-301a-3p
PTH	0.0403693	0.376848	0.184091	2	hsa-miR-103a-3p/hsa-miR-107	hsa-miR-15b-5p/hsa-miR-15b-5p
RALYL	0.0403693	0.376848	0.184091	2	hsa-miR-23a-3p/hsa-miR-23b-3p	hsa-miR-27a-3p
RGPD8	0.0403693	0.376848	0.184091	2	hsa-miR-15b-5p/hsa-miR-15b-5p	hsa-miR-27a-3p
RTCA	0.0403693	0.376848	0.184091	2	hsa-let-7a-5p/hsa-let-7e-5p/hsa-let-7f-5p/hsa-let-7g-5p/hsa-miR-98-5p	hsa-miR-301a-3p
RWDD2A	0.0403693	0.376848	0.184091	2	hsa-miR-133b	hsa-miR-142-5p
SHPRH	0.0403693	0.376848	0.184091	2	hsa-miR-29b-3p	hsa-miR-502-3p
SIDT1	0.0403693	0.376848	0.184091	2	hsa-miR-143-3p	hsa-miR-29b-3p
SLC39A2	0.0403693	0.376848	0.184091	2	hsa-miR-143-3p	hsa-miR-22-3p
SLC52A3	0.0403693	0.376848	0.184091	2	hsa-let-7a-5p/hsa-let-7e-5p/hsa-let-7f-5p/hsa-let-7g-5p/hsa-miR-98-5p	hsa-miR-338-3p
STAT5A	0.0403693	0.376848	0.184091	2	hsa-miR-200a-3p	hsa-miR-23a-3p/hsa-miR-23b-3p
STK32A	0.0403693	0.376848	0.184091	2	hsa-miR-15b-5p/hsa-miR-15b-5p	hsa-miR-23a-3p/hsa-miR-23b-3p
TACR3	0.0403693	0.376848	0.184091	2	hsa-miR-22-3p	hsa-miR-23a-3p/hsa-miR-23b-3p
TFAP2D	0.0403693	0.376848	0.184091	2	hsa-miR-133b	hsa-miR-15b-5p/hsa-miR-15b-5p
THPO	0.0403693	0.376848	0.184091	2	hsa-miR-22-3p	hsa-miR-29b-3p
TNF	0.0403693	0.376848	0.184091	2	hsa-miR-181c-5p	hsa-miR-301a-3p
TP63	0.0403693	0.376848	0.184091	2	hsa-miR-22-3p	hsa-miR-301a-3p
TRPC6	0.0403693	0.376848	0.184091	2	hsa-miR-26a-5p/hsa-miR-26b-5p	hsa-miR-29b-3p
TRRAP	0.0403693	0.376848	0.184091	2	hsa-miR-181c-5p	hsa-miR-23a-3p/hsa-miR-23b-3p
TTC39B	0.0403693	0.376848	0.184091	2	hsa-miR-181c-5p	hsa-miR-27a-3p
TUBA1A	0.0403693	0.376848	0.184091	2	hsa-miR-15b-5p/hsa-miR-15b-5p	hsa-miR-221-3p
UNG	0.0403693	0.376848	0.184091	2	hsa-miR-15b-5p/hsa-miR-15b-5p	hsa-miR-199a-5p
USP9Y	0.0403693	0.376848	0.184091	2	hsa-miR-132-3p/hsa-miR-212-3p	hsa-miR-181c-5p
WDR5B	0.0403693	0.376848	0.184091	2	hsa-miR-142-5p	hsa-miR-342-3p
YIF1B	0.0403693	0.376848	0.184091	2	hsa-miR-143-3p	hsa-miR-338-3p
ZBTB42	0.0403693	0.376848	0.184091	2	hsa-miR-199a-5p	hsa-miR-27a-3p
ZNF354A	0.0403693	0.376848	0.184091	2	hsa-let-7a-5p/hsa-let-7e-5p/hsa-let-7f-5p/hsa-let-7g-5p/hsa-miR-98-5p	hsa-miR-133b
ZNF583	0.0403693	0.376848	0.184091	2	hsa-let-7a-5p/hsa-let-7e-5p/hsa-let-7f-5p/hsa-let-7g-5p/hsa-miR-98-5p	hsa-miR-143-3p
ZNF791	0.0403693	0.376848	0.184091	2	hsa-miR-181c-5p	hsa-miR-199a-5p
ABCC5	0.0414192	0.376848	0.286364	3	hsa-let-7a-5p/hsa-let-7e-5p/hsa-let-7f-5p/hsa-let-7g-5p/hsa-miR-98-5p	hsa-miR-142-5p	hsa-miR-199a-5p
ACPL2	0.0414192	0.376848	0.286364	3	hsa-miR-26a-5p/hsa-miR-26b-5p	hsa-miR-29b-3p	hsa-miR-301a-3p
BRI3BP	0.0414192	0.376848	0.286364	3	hsa-miR-15b-5p/hsa-miR-15b-5p	hsa-miR-200a-3p	hsa-miR-502-3p
C8orf58	0.0414192	0.376848	0.286364	3	hsa-let-7a-5p/hsa-let-7e-5p/hsa-let-7f-5p/hsa-let-7g-5p/hsa-miR-98-5p	hsa-miR-15b-5p/hsa-miR-15b-5p	hsa-miR-23a-3p/hsa-miR-23b-3p
CACNA1A	0.0414192	0.376848	0.286364	3	hsa-miR-143-3p	hsa-miR-27a-3p	hsa-miR-29b-3p
CAMKV	0.0414192	0.376848	0.286364	3	hsa-miR-103a-3p/hsa-miR-107	hsa-miR-15b-5p/hsa-miR-15b-5p	hsa-miR-342-3p
CCBL2	0.0414192	0.376848	0.286364	3	hsa-miR-103a-3p/hsa-miR-107	hsa-miR-199a-5p	hsa-miR-26a-5p/hsa-miR-26b-5p
COL1A2	0.0414192	0.376848	0.286364	3	hsa-let-7a-5p/hsa-let-7e-5p/hsa-let-7f-5p/hsa-let-7g-5p/hsa-miR-98-5p	hsa-miR-26a-5p/hsa-miR-26b-5p	hsa-miR-29b-3p
COL5A3	0.0414192	0.376848	0.286364	3	hsa-miR-143-3p	hsa-miR-199a-5p	hsa-miR-29b-3p
COLGALT2	0.0414192	0.376848	0.286364	3	hsa-miR-15b-5p/hsa-miR-15b-5p	hsa-miR-27a-3p	hsa-miR-342-3p
CSDE1	0.0414192	0.376848	0.286364	3	hsa-miR-132-3p/hsa-miR-212-3p	hsa-miR-15b-5p/hsa-miR-15b-5p	hsa-miR-502-3p
CYR61	0.0414192	0.376848	0.286364	3	hsa-miR-181c-5p	hsa-miR-221-3p	hsa-miR-22-3p
DDR1	0.0414192	0.376848	0.286364	3	hsa-miR-15b-5p/hsa-miR-15b-5p	hsa-miR-193a-3p/hsa-miR-193b-3p	hsa-miR-199a-5p
DEPDC1B	0.0414192	0.376848	0.286364	3	hsa-miR-199a-5p	hsa-miR-26a-5p/hsa-miR-26b-5p	hsa-miR-27a-3p
FAM43A	0.0414192	0.376848	0.286364	3	hsa-let-7a-5p/hsa-let-7e-5p/hsa-let-7f-5p/hsa-let-7g-5p/hsa-miR-98-5p	hsa-miR-148a-3p	hsa-miR-301a-3p
FAM57B	0.0414192	0.376848	0.286364	3	hsa-miR-103a-3p/hsa-miR-107	hsa-miR-15b-5p/hsa-miR-15b-5p	hsa-miR-29b-3p
FOSL1	0.0414192	0.376848	0.286364	3	hsa-miR-15b-5p/hsa-miR-15b-5p	hsa-miR-29b-3p	hsa-miR-301a-3p
FOXA1	0.0414192	0.376848	0.286364	3	hsa-miR-132-3p/hsa-miR-212-3p	hsa-miR-200a-3p	hsa-miR-23a-3p/hsa-miR-23b-3p
FRZB	0.0414192	0.376848	0.286364	3	hsa-miR-142-5p	hsa-miR-301a-3p	hsa-miR-338-3p
FZD6	0.0414192	0.376848	0.286364	3	hsa-miR-15b-5p/hsa-miR-15b-5p	hsa-miR-199a-5p	hsa-miR-301a-3p
GABRQ	0.0414192	0.376848	0.286364	3	hsa-miR-103a-3p/hsa-miR-107	hsa-miR-181c-5p	hsa-miR-193a-3p/hsa-miR-193b-3p
GATA4	0.0414192	0.376848	0.286364	3	hsa-miR-15b-5p/hsa-miR-15b-5p	hsa-miR-221-3p	hsa-miR-26a-5p/hsa-miR-26b-5p
GLB1L	0.0414192	0.376848	0.286364	3	hsa-miR-142-5p	hsa-miR-181c-5p	hsa-miR-29b-3p
GLRA2	0.0414192	0.376848	0.286364	3	hsa-miR-103a-3p/hsa-miR-107	hsa-miR-133b	hsa-miR-27a-3p
GRIN1	0.0414192	0.376848	0.286364	3	hsa-miR-15b-5p/hsa-miR-15b-5p	hsa-miR-338-3p	hsa-miR-342-3p
GRIN2D	0.0414192	0.376848	0.286364	3	hsa-miR-200a-3p	hsa-miR-27a-3p	hsa-miR-342-3p
GSR	0.0414192	0.376848	0.286364	3	hsa-miR-148a-3p	hsa-miR-193a-3p/hsa-miR-193b-3p	hsa-miR-26a-5p/hsa-miR-26b-5p
H2AFZ	0.0414192	0.376848	0.286364	3	hsa-miR-132-3p/hsa-miR-212-3p	hsa-miR-200a-3p	hsa-miR-27a-3p
HEXIM1	0.0414192	0.376848	0.286364	3	hsa-miR-181c-5p	hsa-miR-23a-3p/hsa-miR-23b-3p	hsa-miR-338-3p
HN1	0.0414192	0.376848	0.286364	3	hsa-miR-142-5p	hsa-miR-29b-3p	hsa-miR-338-3p
IKBKAP	0.0414192	0.376848	0.286364	3	hsa-let-7a-5p/hsa-let-7e-5p/hsa-let-7f-5p/hsa-let-7g-5p/hsa-miR-98-5p	hsa-miR-103a-3p/hsa-miR-107	hsa-miR-15b-5p/hsa-miR-15b-5p
IL1RAP	0.0414192	0.376848	0.286364	3	hsa-miR-23a-3p/hsa-miR-23b-3p	hsa-miR-29b-3p	hsa-miR-301a-3p
KCNE4	0.0414192	0.376848	0.286364	3	hsa-miR-15b-5p/hsa-miR-15b-5p	hsa-miR-26a-5p/hsa-miR-26b-5p	hsa-miR-342-3p
KCNJ10	0.0414192	0.376848	0.286364	3	hsa-miR-142-5p	hsa-miR-181c-5p	hsa-miR-301a-3p
KIAA0895L	0.0414192	0.376848	0.286364	3	hsa-let-7a-5p/hsa-let-7e-5p/hsa-let-7f-5p/hsa-let-7g-5p/hsa-miR-98-5p	hsa-miR-29b-3p	hsa-miR-338-3p
KLHL2	0.0414192	0.376848	0.286364	3	hsa-miR-133b	hsa-miR-181c-5p	hsa-miR-193a-3p/hsa-miR-193b-3p
LPPR1	0.0414192	0.376848	0.286364	3	hsa-miR-142-5p	hsa-miR-221-3p	hsa-miR-27a-3p
LRRC15	0.0414192	0.376848	0.286364	3	hsa-miR-103a-3p/hsa-miR-107	hsa-miR-15b-5p/hsa-miR-15b-5p	hsa-miR-342-3p
MAB21L1	0.0414192	0.376848	0.286364	3	hsa-miR-143-3p	hsa-miR-199a-5p	hsa-miR-26a-5p/hsa-miR-26b-5p
MGLL	0.0414192	0.376848	0.286364	3	hsa-let-7a-5p/hsa-let-7e-5p/hsa-let-7f-5p/hsa-let-7g-5p/hsa-miR-98-5p	hsa-miR-142-5p	hsa-miR-148a-3p
NCOA4	0.0414192	0.376848	0.286364	3	hsa-miR-26a-5p/hsa-miR-26b-5p	hsa-miR-29b-3p	hsa-miR-502-3p
PAK6	0.0414192	0.376848	0.286364	3	hsa-miR-23a-3p/hsa-miR-23b-3p	hsa-miR-27a-3p	hsa-miR-301a-3p
PDPR	0.0414192	0.376848	0.286364	3	hsa-let-7a-5p/hsa-let-7e-5p/hsa-let-7f-5p/hsa-let-7g-5p/hsa-miR-98-5p	hsa-miR-143-3p	hsa-miR-15b-5p/hsa-miR-15b-5p
PMAIP1	0.0414192	0.376848	0.286364	3	hsa-let-7a-5p/hsa-let-7e-5p/hsa-let-7f-5p/hsa-let-7g-5p/hsa-miR-98-5p	hsa-miR-23a-3p/hsa-miR-23b-3p	hsa-miR-26a-5p/hsa-miR-26b-5p
PRKCB	0.0414192	0.376848	0.286364	3	hsa-miR-133b	hsa-miR-27a-3p	hsa-miR-433-3p
RAD21	0.0414192	0.376848	0.286364	3	hsa-miR-181c-5p	hsa-miR-23a-3p/hsa-miR-23b-3p	hsa-miR-433-3p
RANBP3	0.0414192	0.376848	0.286364	3	hsa-miR-15b-5p/hsa-miR-15b-5p	hsa-miR-181c-5p	hsa-miR-199a-5p
RASGRP1	0.0414192	0.376848	0.286364	3	hsa-let-7a-5p/hsa-let-7e-5p/hsa-let-7f-5p/hsa-let-7g-5p/hsa-miR-98-5p	hsa-miR-132-3p/hsa-miR-212-3p	hsa-miR-154-3p
RBM25	0.0414192	0.376848	0.286364	3	hsa-miR-181c-5p	hsa-miR-23a-3p/hsa-miR-23b-3p	hsa-miR-301a-3p
SERPINH1	0.0414192	0.376848	0.286364	3	hsa-miR-103a-3p/hsa-miR-107	hsa-miR-29b-3p	hsa-miR-301a-3p
SGCB	0.0414192	0.376848	0.286364	3	hsa-miR-148a-3p	hsa-miR-29b-3p	hsa-miR-301a-3p
SIRT7	0.0414192	0.376848	0.286364	3	hsa-miR-142-5p	hsa-miR-148a-3p	hsa-miR-301a-3p
SLC25A24	0.0414192	0.376848	0.286364	3	hsa-let-7a-5p/hsa-let-7e-5p/hsa-let-7f-5p/hsa-let-7g-5p/hsa-miR-98-5p	hsa-miR-181c-5p	hsa-miR-23a-3p/hsa-miR-23b-3p
SOCS1	0.0414192	0.376848	0.286364	3	hsa-let-7a-5p/hsa-let-7e-5p/hsa-let-7f-5p/hsa-let-7g-5p/hsa-miR-98-5p	hsa-miR-142-5p	hsa-miR-221-3p
TFG	0.0414192	0.376848	0.286364	3	hsa-miR-133b	hsa-miR-221-3p	hsa-miR-338-3p
TMPPE	0.0414192	0.376848	0.286364	3	hsa-let-7a-5p/hsa-let-7e-5p/hsa-let-7f-5p/hsa-let-7g-5p/hsa-miR-98-5p	hsa-miR-15b-5p/hsa-miR-15b-5p	hsa-miR-26a-5p/hsa-miR-26b-5p
TTC31	0.0414192	0.376848	0.286364	3	hsa-let-7a-5p/hsa-let-7e-5p/hsa-let-7f-5p/hsa-let-7g-5p/hsa-miR-98-5p	hsa-miR-133b	hsa-miR-22-3p
UBAP2L	0.0414192	0.376848	0.286364	3	hsa-miR-148a-3p	hsa-miR-301a-3p	hsa-miR-532-5p
USP33	0.0414192	0.376848	0.286364	3	hsa-miR-148a-3p	hsa-miR-181c-5p	hsa-miR-301a-3p
WASF1	0.0414192	0.376848	0.286364	3	hsa-miR-181c-5p	hsa-miR-22-3p	hsa-miR-29b-3p
WDFY4	0.0414192	0.376848	0.286364	3	hsa-let-7a-5p/hsa-let-7e-5p/hsa-let-7f-5p/hsa-let-7g-5p/hsa-miR-98-5p	hsa-miR-103a-3p/hsa-miR-107	hsa-miR-15b-5p/hsa-miR-15b-5p
ZC4H2	0.0414192	0.376848	0.286364	3	hsa-miR-143-3p	hsa-miR-23a-3p/hsa-miR-23b-3p	hsa-miR-29b-3p
DOCK4	0.0415338	0.376848	0.417273	5	hsa-miR-132-3p/hsa-miR-212-3p	hsa-miR-154-3p	hsa-miR-181c-5p	hsa-miR-200a-3p	hsa-miR-26a-5p/hsa-miR-26b-5p
EPAS1	0.0415338	0.376848	0.417273	5	hsa-miR-142-5p	hsa-miR-148a-3p	hsa-miR-23a-3p/hsa-miR-23b-3p	hsa-miR-26a-5p/hsa-miR-26b-5p	hsa-miR-27a-3p
FBXO21	0.0415338	0.376848	0.417273	5	hsa-let-7a-5p/hsa-let-7e-5p/hsa-let-7f-5p/hsa-let-7g-5p/hsa-miR-98-5p	hsa-miR-132-3p/hsa-miR-212-3p	hsa-miR-142-5p	hsa-miR-15b-5p/hsa-miR-15b-5p	hsa-miR-433-3p
GNS	0.0415338	0.376848	0.417273	5	hsa-let-7a-5p/hsa-let-7e-5p/hsa-let-7f-5p/hsa-let-7g-5p/hsa-miR-98-5p	hsa-miR-103a-3p/hsa-miR-107	hsa-miR-143-3p	hsa-miR-27a-3p	hsa-miR-29b-3p
KSR1	0.0415338	0.376848	0.417273	5	hsa-miR-15b-5p/hsa-miR-15b-5p	hsa-miR-181c-5p	hsa-miR-221-3p	hsa-miR-23a-3p/hsa-miR-23b-3p	hsa-miR-27a-3p
NBEAL1	0.0415338	0.376848	0.417273	5	hsa-miR-142-5p	hsa-miR-15b-5p/hsa-miR-15b-5p	hsa-miR-221-3p	hsa-miR-27a-3p	hsa-miR-301a-3p
NREP	0.0415338	0.376848	0.417273	5	hsa-miR-103a-3p/hsa-miR-107	hsa-miR-132-3p/hsa-miR-212-3p	hsa-miR-181c-5p	hsa-miR-27a-3p	hsa-miR-29b-3p
PAWR	0.0415338	0.376848	0.417273	5	hsa-let-7a-5p/hsa-let-7e-5p/hsa-let-7f-5p/hsa-let-7g-5p/hsa-miR-98-5p	hsa-miR-103a-3p/hsa-miR-107	hsa-miR-133b	hsa-miR-181c-5p	hsa-miR-26a-5p/hsa-miR-26b-5p
PHTF2	0.0415338	0.376848	0.417273	5	hsa-miR-133b	hsa-miR-143-3p	hsa-miR-181c-5p	hsa-miR-199a-5p	hsa-miR-26a-5p/hsa-miR-26b-5p
SLC16A2	0.0415338	0.376848	0.417273	5	hsa-miR-143-3p	hsa-miR-191-5p	hsa-miR-22-3p	hsa-miR-23a-3p/hsa-miR-23b-3p	hsa-miR-29b-3p
VTI1B	0.0415338	0.376848	0.417273	5	hsa-miR-133b	hsa-miR-143-3p	hsa-miR-154-3p	hsa-miR-15b-5p/hsa-miR-15b-5p	hsa-miR-23a-3p/hsa-miR-23b-3p
AKIRIN1	0.0423352	0.382762	0.536932	8	hsa-miR-132-3p/hsa-miR-212-3p	hsa-miR-143-3p	hsa-miR-15b-5p/hsa-miR-15b-5p	hsa-miR-181c-5p	hsa-miR-200a-3p	hsa-miR-26a-5p/hsa-miR-26b-5p	hsa-miR-27a-3p	hsa-miR-342-3p
UHMK1	0.0423352	0.382762	0.536932	8	hsa-miR-103a-3p/hsa-miR-107	hsa-miR-142-5p	hsa-miR-148a-3p	hsa-miR-15b-5p/hsa-miR-15b-5p	hsa-miR-199a-5p	hsa-miR-23a-3p/hsa-miR-23b-3p	hsa-miR-301a-3p	hsa-miR-433-3p
WDR37	0.0423352	0.382762	0.536932	8	hsa-let-7a-5p/hsa-let-7e-5p/hsa-let-7f-5p/hsa-let-7g-5p/hsa-miR-98-5p	hsa-miR-15b-5p/hsa-miR-15b-5p	hsa-miR-181c-5p	hsa-miR-221-3p	hsa-miR-23a-3p/hsa-miR-23b-3p	hsa-miR-27a-3p	hsa-miR-29b-3p	hsa-miR-342-3p
ANKRD52	0.0425651	0.384387	0.675	14	hsa-let-7a-5p/hsa-let-7e-5p/hsa-let-7f-5p/hsa-let-7g-5p/hsa-miR-98-5p	hsa-miR-103a-3p/hsa-miR-107	hsa-miR-133b	hsa-miR-148a-3p	hsa-miR-181c-5p	hsa-miR-199a-5p	hsa-miR-221-3p	hsa-miR-22-3p	hsa-miR-23a-3p/hsa-miR-23b-3p	hsa-miR-26a-5p/hsa-miR-26b-5p	hsa-miR-29b-3p	hsa-miR-301a-3p	hsa-miR-342-3p	hsa-miR-433-3p
ETV3	0.0443956	0.385639	0.508442	7	hsa-let-7a-5p/hsa-let-7e-5p/hsa-let-7f-5p/hsa-let-7g-5p/hsa-miR-98-5p	hsa-miR-103a-3p/hsa-miR-107	hsa-miR-148a-3p	hsa-miR-15b-5p/hsa-miR-15b-5p	hsa-miR-221-3p	hsa-miR-26a-5p/hsa-miR-26b-5p	hsa-miR-301a-3p
GMEB1	0.0443956	0.385639	0.508442	7	hsa-miR-133b	hsa-miR-199a-5p	hsa-miR-200a-3p	hsa-miR-26a-5p/hsa-miR-26b-5p	hsa-miR-29b-3p	hsa-miR-301a-3p	hsa-miR-342-3p
PIK3C2A	0.0443956	0.385639	0.508442	7	hsa-miR-133b	hsa-miR-148a-3p	hsa-miR-15b-5p/hsa-miR-15b-5p	hsa-miR-181c-5p	hsa-miR-23a-3p/hsa-miR-23b-3p	hsa-miR-26a-5p/hsa-miR-26b-5p	hsa-miR-301a-3p
SATB2	0.0443956	0.385639	0.508442	7	hsa-miR-103a-3p/hsa-miR-107	hsa-miR-132-3p/hsa-miR-212-3p	hsa-miR-191-5p	hsa-miR-22-3p	hsa-miR-23a-3p/hsa-miR-23b-3p	hsa-miR-27a-3p	hsa-miR-301a-3p
SCAI	0.0443956	0.385639	0.508442	7	hsa-miR-103a-3p/hsa-miR-107	hsa-miR-15b-5p/hsa-miR-15b-5p	hsa-miR-181c-5p	hsa-miR-23a-3p/hsa-miR-23b-3p	hsa-miR-27a-3p	hsa-miR-29b-3p	hsa-miR-338-3p
EPN2	0.0445889	0.385639	0.470455	6	hsa-miR-142-5p	hsa-miR-148a-3p	hsa-miR-181c-5p	hsa-miR-23a-3p/hsa-miR-23b-3p	hsa-miR-342-3p	hsa-miR-433-3p
FAM208A	0.0445889	0.385639	0.470455	6	hsa-let-7a-5p/hsa-let-7e-5p/hsa-let-7f-5p/hsa-let-7g-5p/hsa-miR-98-5p	hsa-miR-133b	hsa-miR-221-3p	hsa-miR-26a-5p/hsa-miR-26b-5p	hsa-miR-342-3p	hsa-miR-433-3p
HOMER1	0.0445889	0.385639	0.470455	6	hsa-miR-148a-3p	hsa-miR-181c-5p	hsa-miR-22-3p	hsa-miR-26a-5p/hsa-miR-26b-5p	hsa-miR-29b-3p	hsa-miR-301a-3p
LIN28A	0.0445889	0.385639	0.470455	6	hsa-let-7a-5p/hsa-let-7e-5p/hsa-let-7f-5p/hsa-let-7g-5p/hsa-miR-98-5p	hsa-miR-103a-3p/hsa-miR-107	hsa-miR-148a-3p	hsa-miR-15b-5p/hsa-miR-15b-5p	hsa-miR-181c-5p	hsa-miR-301a-3p
MBTD1	0.0445889	0.385639	0.470455	6	hsa-let-7a-5p/hsa-let-7e-5p/hsa-let-7f-5p/hsa-let-7g-5p/hsa-miR-98-5p	hsa-miR-142-5p	hsa-miR-200a-3p	hsa-miR-23a-3p/hsa-miR-23b-3p	hsa-miR-27a-3p	hsa-miR-29b-3p
RPS6KA5	0.0445889	0.385639	0.470455	6	hsa-miR-103a-3p/hsa-miR-107	hsa-miR-142-5p	hsa-miR-148a-3p	hsa-miR-199a-5p	hsa-miR-27a-3p	hsa-miR-301a-3p
SLC16A10	0.0445889	0.385639	0.470455	6	hsa-let-7a-5p/hsa-let-7e-5p/hsa-let-7f-5p/hsa-let-7g-5p/hsa-miR-98-5p	hsa-miR-23a-3p/hsa-miR-23b-3p	hsa-miR-26a-5p/hsa-miR-26b-5p	hsa-miR-27a-3p	hsa-miR-29b-3p	hsa-miR-338-3p
SPTY2D1	0.0445889	0.385639	0.470455	6	hsa-miR-133b	hsa-miR-148a-3p	hsa-miR-181c-5p	hsa-miR-27a-3p	hsa-miR-29b-3p	hsa-miR-301a-3p
TSC1	0.0445889	0.385639	0.470455	6	hsa-let-7a-5p/hsa-let-7e-5p/hsa-let-7f-5p/hsa-let-7g-5p/hsa-miR-98-5p	hsa-miR-15b-5p/hsa-miR-15b-5p	hsa-miR-193a-3p/hsa-miR-193b-3p	hsa-miR-200a-3p	hsa-miR-27a-3p	hsa-miR-301a-3p
VASH2	0.0445889	0.385639	0.470455	6	hsa-let-7a-5p/hsa-let-7e-5p/hsa-let-7f-5p/hsa-let-7g-5p/hsa-miR-98-5p	hsa-miR-142-5p	hsa-miR-148a-3p	hsa-miR-27a-3p	hsa-miR-29b-3p	hsa-miR-433-3p
ZBTB39	0.0445889	0.385639	0.470455	6	hsa-let-7a-5p/hsa-let-7e-5p/hsa-let-7f-5p/hsa-let-7g-5p/hsa-miR-98-5p	hsa-miR-103a-3p/hsa-miR-107	hsa-miR-15b-5p/hsa-miR-15b-5p	hsa-miR-22-3p	hsa-miR-27a-3p	hsa-miR-338-3p
AKAP12	0.0449141	0.385639	0.368182	4	hsa-miR-103a-3p/hsa-miR-107	hsa-miR-15b-5p/hsa-miR-15b-5p	hsa-miR-23a-3p/hsa-miR-23b-3p	hsa-miR-338-3p
AP1S1	0.0449141	0.385639	0.368182	4	hsa-let-7a-5p/hsa-let-7e-5p/hsa-let-7f-5p/hsa-let-7g-5p/hsa-miR-98-5p	hsa-miR-22-3p	hsa-miR-23a-3p/hsa-miR-23b-3p	hsa-miR-29b-3p
ARL4A	0.0449141	0.385639	0.368182	4	hsa-miR-142-5p	hsa-miR-200a-3p	hsa-miR-29b-3p	hsa-miR-301a-3p
ARX	0.0449141	0.385639	0.368182	4	hsa-miR-132-3p/hsa-miR-212-3p	hsa-miR-133b	hsa-miR-27a-3p	hsa-miR-301a-3p
DCAF8	0.0449141	0.385639	0.368182	4	hsa-let-7a-5p/hsa-let-7e-5p/hsa-let-7f-5p/hsa-let-7g-5p/hsa-miR-98-5p	hsa-miR-132-3p/hsa-miR-212-3p	hsa-miR-15b-5p/hsa-miR-15b-5p	hsa-miR-301a-3p
DOLPP1	0.0449141	0.385639	0.368182	4	hsa-miR-133b	hsa-miR-15b-5p/hsa-miR-15b-5p	hsa-miR-200a-3p	hsa-miR-29b-3p
ERLIN2	0.0449141	0.385639	0.368182	4	hsa-miR-15b-5p/hsa-miR-15b-5p	hsa-miR-181c-5p	hsa-miR-23a-3p/hsa-miR-23b-3p	hsa-miR-29b-3p
GATA3	0.0449141	0.385639	0.368182	4	hsa-miR-142-5p	hsa-miR-200a-3p	hsa-miR-27a-3p	hsa-miR-433-3p
GCC2	0.0449141	0.385639	0.368182	4	hsa-miR-142-5p	hsa-miR-15b-5p/hsa-miR-15b-5p	hsa-miR-181c-5p	hsa-miR-27a-3p
GPR12	0.0449141	0.385639	0.368182	4	hsa-miR-103a-3p/hsa-miR-107	hsa-miR-200a-3p	hsa-miR-221-3p	hsa-miR-26a-5p/hsa-miR-26b-5p
JPH3	0.0449141	0.385639	0.368182	4	hsa-miR-103a-3p/hsa-miR-107	hsa-miR-148a-3p	hsa-miR-191-5p	hsa-miR-199a-5p
LMBRD2	0.0449141	0.385639	0.368182	4	hsa-miR-181c-5p	hsa-miR-26a-5p/hsa-miR-26b-5p	hsa-miR-301a-3p	hsa-miR-338-3p
MAPT	0.0449141	0.385639	0.368182	4	hsa-miR-132-3p/hsa-miR-212-3p	hsa-miR-181c-5p	hsa-miR-27a-3p	hsa-miR-338-3p
METTL21A	0.0449141	0.385639	0.368182	4	hsa-miR-199a-5p	hsa-miR-27a-3p	hsa-miR-338-3p	hsa-miR-342-3p
NCOR1	0.0449141	0.385639	0.368182	4	hsa-let-7a-5p/hsa-let-7e-5p/hsa-let-7f-5p/hsa-let-7g-5p/hsa-miR-98-5p	hsa-miR-132-3p/hsa-miR-212-3p	hsa-miR-148a-3p	hsa-miR-199a-5p
NRIP3	0.0449141	0.385639	0.368182	4	hsa-miR-133b	hsa-miR-142-5p	hsa-miR-200a-3p	hsa-miR-342-3p
PAX7	0.0449141	0.385639	0.368182	4	hsa-miR-132-3p/hsa-miR-212-3p	hsa-miR-133b	hsa-miR-15b-5p/hsa-miR-15b-5p	hsa-miR-342-3p
PI4K2B	0.0449141	0.385639	0.368182	4	hsa-let-7a-5p/hsa-let-7e-5p/hsa-let-7f-5p/hsa-let-7g-5p/hsa-miR-98-5p	hsa-miR-15b-5p/hsa-miR-15b-5p	hsa-miR-181c-5p	hsa-miR-338-3p
PLEKHA7	0.0449141	0.385639	0.368182	4	hsa-miR-103a-3p/hsa-miR-107	hsa-miR-142-5p	hsa-miR-193a-3p/hsa-miR-193b-3p	hsa-miR-200a-3p
PPP2R5C	0.0449141	0.385639	0.368182	4	hsa-miR-103a-3p/hsa-miR-107	hsa-miR-132-3p/hsa-miR-212-3p	hsa-miR-15b-5p/hsa-miR-15b-5p	hsa-miR-193a-3p/hsa-miR-193b-3p
PRELP	0.0449141	0.385639	0.368182	4	hsa-miR-15b-5p/hsa-miR-15b-5p	hsa-miR-22-3p	hsa-miR-26a-5p/hsa-miR-26b-5p	hsa-miR-29b-3p
PXDN	0.0449141	0.385639	0.368182	4	hsa-let-7a-5p/hsa-let-7e-5p/hsa-let-7f-5p/hsa-let-7g-5p/hsa-miR-98-5p	hsa-miR-23a-3p/hsa-miR-23b-3p	hsa-miR-29b-3p	hsa-miR-301a-3p
RRP15	0.0449141	0.385639	0.368182	4	hsa-miR-133b	hsa-miR-199a-5p	hsa-miR-200a-3p	hsa-miR-23a-3p/hsa-miR-23b-3p
SLC2A1	0.0449141	0.385639	0.368182	4	hsa-miR-132-3p/hsa-miR-212-3p	hsa-miR-148a-3p	hsa-miR-22-3p	hsa-miR-301a-3p
SYNRG	0.0449141	0.385639	0.368182	4	hsa-miR-103a-3p/hsa-miR-107	hsa-miR-133b	hsa-miR-15b-5p/hsa-miR-15b-5p	hsa-miR-27a-3p
TBC1D9	0.0449141	0.385639	0.368182	4	hsa-miR-142-5p	hsa-miR-15b-5p/hsa-miR-15b-5p	hsa-miR-181c-5p	hsa-miR-23a-3p/hsa-miR-23b-3p
TSC22D3	0.0449141	0.385639	0.368182	4	hsa-miR-143-3p	hsa-miR-15b-5p/hsa-miR-15b-5p	hsa-miR-221-3p	hsa-miR-29b-3p
VAMP1	0.0449141	0.385639	0.368182	4	hsa-miR-103a-3p/hsa-miR-107	hsa-miR-15b-5p/hsa-miR-15b-5p	hsa-miR-26a-5p/hsa-miR-26b-5p	hsa-miR-532-5p
DCUN1D3	0.0456533	0.390239	0.572727	9	hsa-let-7a-5p/hsa-let-7e-5p/hsa-let-7f-5p/hsa-let-7g-5p/hsa-miR-98-5p	hsa-miR-103a-3p/hsa-miR-107	hsa-miR-132-3p/hsa-miR-212-3p	hsa-miR-148a-3p	hsa-miR-200a-3p	hsa-miR-23a-3p/hsa-miR-23b-3p	hsa-miR-26a-5p/hsa-miR-26b-5p	hsa-miR-301a-3p	hsa-miR-338-3p
DYRK1A	0.0456533	0.390239	0.572727	9	hsa-let-7a-5p/hsa-let-7e-5p/hsa-let-7f-5p/hsa-let-7g-5p/hsa-miR-98-5p	hsa-miR-148a-3p	hsa-miR-154-3p	hsa-miR-193a-3p/hsa-miR-193b-3p	hsa-miR-199a-5p	hsa-miR-221-3p	hsa-miR-23a-3p/hsa-miR-23b-3p	hsa-miR-26a-5p/hsa-miR-26b-5p	hsa-miR-27a-3p
GXYLT1	0.0456533	0.390239	0.572727	9	hsa-let-7a-5p/hsa-let-7e-5p/hsa-let-7f-5p/hsa-let-7g-5p/hsa-miR-98-5p	hsa-miR-133b	hsa-miR-142-5p	hsa-miR-143-3p	hsa-miR-193a-3p/hsa-miR-193b-3p	hsa-miR-23a-3p/hsa-miR-23b-3p	hsa-miR-27a-3p	hsa-miR-342-3p	hsa-miR-433-3p
ZNF618	0.0456533	0.390239	0.572727	9	hsa-miR-143-3p	hsa-miR-148a-3p	hsa-miR-181c-5p	hsa-miR-193a-3p/hsa-miR-193b-3p	hsa-miR-199a-5p	hsa-miR-200a-3p	hsa-miR-221-3p	hsa-miR-22-3p	hsa-miR-27a-3p
KPNA4	0.0475116	0.405221	0.624793	11	hsa-let-7a-5p/hsa-let-7e-5p/hsa-let-7f-5p/hsa-let-7g-5p/hsa-miR-98-5p	hsa-miR-103a-3p/hsa-miR-107	hsa-miR-142-5p	hsa-miR-148a-3p	hsa-miR-15b-5p/hsa-miR-15b-5p	hsa-miR-181c-5p	hsa-miR-199a-5p	hsa-miR-200a-3p	hsa-miR-23a-3p/hsa-miR-23b-3p	hsa-miR-29b-3p	hsa-miR-502-3p
RORA	0.0475116	0.405221	0.624793	11	hsa-miR-103a-3p/hsa-miR-107	hsa-miR-142-5p	hsa-miR-148a-3p	hsa-miR-15b-5p/hsa-miR-15b-5p	hsa-miR-181c-5p	hsa-miR-193a-3p/hsa-miR-193b-3p	hsa-miR-200a-3p	hsa-miR-23a-3p/hsa-miR-23b-3p	hsa-miR-26a-5p/hsa-miR-26b-5p	hsa-miR-27a-3p	hsa-miR-29b-3p
ANK2	0.0525586	0.43757	0.441818	5	hsa-miR-133b	hsa-miR-148a-3p	hsa-miR-200a-3p	hsa-miR-26a-5p/hsa-miR-26b-5p	hsa-miR-27a-3p
ANKRD33B	0.0525586	0.43757	0.441818	5	hsa-let-7a-5p/hsa-let-7e-5p/hsa-let-7f-5p/hsa-let-7g-5p/hsa-miR-98-5p	hsa-miR-142-5p	hsa-miR-143-3p	hsa-miR-15b-5p/hsa-miR-15b-5p	hsa-miR-181c-5p
AP1G1	0.0525586	0.43757	0.441818	5	hsa-miR-148a-3p	hsa-miR-181c-5p	hsa-miR-191-5p	hsa-miR-199a-5p	hsa-miR-29b-3p
ATL3	0.0525586	0.43757	0.441818	5	hsa-miR-132-3p/hsa-miR-212-3p	hsa-miR-142-5p	hsa-miR-181c-5p	hsa-miR-26a-5p/hsa-miR-26b-5p	hsa-miR-27a-3p
ATP13A3	0.0525586	0.43757	0.441818	5	hsa-miR-103a-3p/hsa-miR-107	hsa-miR-142-5p	hsa-miR-15b-5p/hsa-miR-15b-5p	hsa-miR-301a-3p	hsa-miR-532-5p
CBFA2T3	0.0525586	0.43757	0.441818	5	hsa-let-7a-5p/hsa-let-7e-5p/hsa-let-7f-5p/hsa-let-7g-5p/hsa-miR-98-5p	hsa-miR-15b-5p/hsa-miR-15b-5p	hsa-miR-181c-5p	hsa-miR-23a-3p/hsa-miR-23b-3p	hsa-miR-27a-3p
CDC6	0.0525586	0.43757	0.441818	5	hsa-miR-103a-3p/hsa-miR-107	hsa-miR-15b-5p/hsa-miR-15b-5p	hsa-miR-22-3p	hsa-miR-23a-3p/hsa-miR-23b-3p	hsa-miR-26a-5p/hsa-miR-26b-5p
ETV6	0.0525586	0.43757	0.441818	5	hsa-miR-143-3p	hsa-miR-181c-5p	hsa-miR-193a-3p/hsa-miR-193b-3p	hsa-miR-199a-5p	hsa-miR-29b-3p
FAM104A	0.0525586	0.43757	0.441818	5	hsa-let-7a-5p/hsa-let-7e-5p/hsa-let-7f-5p/hsa-let-7g-5p/hsa-miR-98-5p	hsa-miR-103a-3p/hsa-miR-107	hsa-miR-148a-3p	hsa-miR-27a-3p	hsa-miR-301a-3p
LIN7A	0.0525586	0.43757	0.441818	5	hsa-miR-103a-3p/hsa-miR-107	hsa-miR-133b	hsa-miR-15b-5p/hsa-miR-15b-5p	hsa-miR-27a-3p	hsa-miR-29b-3p
MAML1	0.0525586	0.43757	0.441818	5	hsa-miR-103a-3p/hsa-miR-107	hsa-miR-133b	hsa-miR-142-5p	hsa-miR-23a-3p/hsa-miR-23b-3p	hsa-miR-301a-3p
PDE8B	0.0525586	0.43757	0.441818	5	hsa-miR-103a-3p/hsa-miR-107	hsa-miR-133b	hsa-miR-23a-3p/hsa-miR-23b-3p	hsa-miR-27a-3p	hsa-miR-502-3p
PDHB	0.0525586	0.43757	0.441818	5	hsa-let-7a-5p/hsa-let-7e-5p/hsa-let-7f-5p/hsa-let-7g-5p/hsa-miR-98-5p	hsa-miR-103a-3p/hsa-miR-107	hsa-miR-15b-5p/hsa-miR-15b-5p	hsa-miR-200a-3p	hsa-miR-26a-5p/hsa-miR-26b-5p
PHF20	0.0525586	0.43757	0.441818	5	hsa-miR-103a-3p/hsa-miR-107	hsa-miR-148a-3p	hsa-miR-15b-5p/hsa-miR-15b-5p	hsa-miR-301a-3p	hsa-miR-338-3p
RIMS1	0.0525586	0.43757	0.441818	5	hsa-miR-133b	hsa-miR-142-5p	hsa-miR-199a-5p	hsa-miR-200a-3p	hsa-miR-338-3p
SETD8	0.0525586	0.43757	0.441818	5	hsa-miR-127-3p	hsa-miR-142-5p	hsa-miR-23a-3p/hsa-miR-23b-3p	hsa-miR-26a-5p/hsa-miR-26b-5p	hsa-miR-29b-3p
SON	0.0525586	0.43757	0.441818	5	hsa-miR-142-5p	hsa-miR-193a-3p/hsa-miR-193b-3p	hsa-miR-200a-3p	hsa-miR-338-3p	hsa-miR-532-5p
TIA1	0.0525586	0.43757	0.441818	5	hsa-let-7a-5p/hsa-let-7e-5p/hsa-let-7f-5p/hsa-let-7g-5p/hsa-miR-98-5p	hsa-miR-23a-3p/hsa-miR-23b-3p	hsa-miR-338-3p	hsa-miR-342-3p	hsa-miR-433-3p
TOB2	0.0525586	0.43757	0.441818	5	hsa-let-7a-5p/hsa-let-7e-5p/hsa-let-7f-5p/hsa-let-7g-5p/hsa-miR-98-5p	hsa-miR-103a-3p/hsa-miR-107	hsa-miR-133b	hsa-miR-143-3p	hsa-miR-301a-3p
VSNL1	0.0525586	0.43757	0.441818	5	hsa-let-7a-5p/hsa-let-7e-5p/hsa-let-7f-5p/hsa-let-7g-5p/hsa-miR-98-5p	hsa-miR-103a-3p/hsa-miR-107	hsa-miR-148a-3p	hsa-miR-22-3p	hsa-miR-23a-3p/hsa-miR-23b-3p
ZBTB8B	0.0525586	0.43757	0.441818	5	hsa-let-7a-5p/hsa-let-7e-5p/hsa-let-7f-5p/hsa-let-7g-5p/hsa-miR-98-5p	hsa-miR-142-5p	hsa-miR-181c-5p	hsa-miR-27a-3p	hsa-miR-29b-3p
ZMYM2	0.0525586	0.43757	0.441818	5	hsa-miR-103a-3p/hsa-miR-107	hsa-miR-15b-5p/hsa-miR-15b-5p	hsa-miR-221-3p	hsa-miR-23a-3p/hsa-miR-23b-3p	hsa-miR-29b-3p
ATXN7	0.0529029	0.438573	0.525974	7	hsa-miR-103a-3p/hsa-miR-107	hsa-miR-132-3p/hsa-miR-212-3p	hsa-miR-181c-5p	hsa-miR-199a-5p	hsa-miR-200a-3p	hsa-miR-23a-3p/hsa-miR-23b-3p	hsa-miR-26a-5p/hsa-miR-26b-5p
STRBP	0.0529029	0.438573	0.525974	7	hsa-let-7a-5p/hsa-let-7e-5p/hsa-let-7f-5p/hsa-let-7g-5p/hsa-miR-98-5p	hsa-miR-103a-3p/hsa-miR-107	hsa-miR-142-5p	hsa-miR-15b-5p/hsa-miR-15b-5p	hsa-miR-26a-5p/hsa-miR-26b-5p	hsa-miR-27a-3p	hsa-miR-433-3p
VPS13B	0.0529029	0.438573	0.525974	7	hsa-miR-133b	hsa-miR-15b-5p/hsa-miR-15b-5p	hsa-miR-200a-3p	hsa-miR-22-3p	hsa-miR-29b-3p	hsa-miR-301a-3p	hsa-miR-433-3p
C11orf87	0.0543087	0.438573	0.490909	6	hsa-miR-132-3p/hsa-miR-212-3p	hsa-miR-142-5p	hsa-miR-221-3p	hsa-miR-27a-3p	hsa-miR-29b-3p	hsa-miR-532-5p
C18orf25	0.0543087	0.438573	0.490909	6	hsa-miR-148a-3p	hsa-miR-199a-5p	hsa-miR-200a-3p	hsa-miR-221-3p	hsa-miR-26a-5p/hsa-miR-26b-5p	hsa-miR-433-3p
COPS2	0.0543087	0.438573	0.490909	6	hsa-miR-103a-3p/hsa-miR-107	hsa-miR-15b-5p/hsa-miR-15b-5p	hsa-miR-181c-5p	hsa-miR-26a-5p/hsa-miR-26b-5p	hsa-miR-338-3p	hsa-miR-532-5p
FMNL3	0.0543087	0.438573	0.490909	6	hsa-miR-127-3p	hsa-miR-148a-3p	hsa-miR-15b-5p/hsa-miR-15b-5p	hsa-miR-22-3p	hsa-miR-29b-3p	hsa-miR-301a-3p
G3BP2	0.0543087	0.438573	0.490909	6	hsa-miR-103a-3p/hsa-miR-107	hsa-miR-181c-5p	hsa-miR-200a-3p	hsa-miR-23a-3p/hsa-miR-23b-3p	hsa-miR-26a-5p/hsa-miR-26b-5p	hsa-miR-301a-3p
GPR137C	0.0543087	0.438573	0.490909	6	hsa-let-7a-5p/hsa-let-7e-5p/hsa-let-7f-5p/hsa-let-7g-5p/hsa-miR-98-5p	hsa-miR-148a-3p	hsa-miR-181c-5p	hsa-miR-200a-3p	hsa-miR-433-3p	hsa-miR-532-5p
KIAA1549L	0.0543087	0.438573	0.490909	6	hsa-miR-181c-5p	hsa-miR-193a-3p/hsa-miR-193b-3p	hsa-miR-200a-3p	hsa-miR-26a-5p/hsa-miR-26b-5p	hsa-miR-29b-3p	hsa-miR-338-3p
KIAA2018	0.0543087	0.438573	0.490909	6	hsa-miR-103a-3p/hsa-miR-107	hsa-miR-181c-5p	hsa-miR-199a-5p	hsa-miR-26a-5p/hsa-miR-26b-5p	hsa-miR-27a-3p	hsa-miR-29b-3p
KPNB1	0.0543087	0.438573	0.490909	6	hsa-miR-103a-3p/hsa-miR-107	hsa-miR-181c-5p	hsa-miR-199a-5p	hsa-miR-23a-3p/hsa-miR-23b-3p	hsa-miR-27a-3p	hsa-miR-29b-3p
MAPRE2	0.0543087	0.438573	0.490909	6	hsa-miR-181c-5p	hsa-miR-191-5p	hsa-miR-199a-5p	hsa-miR-200a-3p	hsa-miR-23a-3p/hsa-miR-23b-3p	hsa-miR-29b-3p
MARK1	0.0543087	0.438573	0.490909	6	hsa-miR-181c-5p	hsa-miR-200a-3p	hsa-miR-221-3p	hsa-miR-23a-3p/hsa-miR-23b-3p	hsa-miR-26a-5p/hsa-miR-26b-5p	hsa-miR-27a-3p
PPP3R1	0.0543087	0.438573	0.490909	6	hsa-miR-103a-3p/hsa-miR-107	hsa-miR-181c-5p	hsa-miR-200a-3p	hsa-miR-221-3p	hsa-miR-26a-5p/hsa-miR-26b-5p	hsa-miR-27a-3p
PVRL1	0.0543087	0.438573	0.490909	6	hsa-miR-103a-3p/hsa-miR-107	hsa-miR-148a-3p	hsa-miR-15b-5p/hsa-miR-15b-5p	hsa-miR-199a-5p	hsa-miR-221-3p	hsa-miR-29b-3p
SNX18	0.0543087	0.438573	0.490909	6	hsa-miR-103a-3p/hsa-miR-107	hsa-miR-132-3p/hsa-miR-212-3p	hsa-miR-200a-3p	hsa-miR-22-3p	hsa-miR-27a-3p	hsa-miR-338-3p
SNX27	0.0543087	0.438573	0.490909	6	hsa-miR-148a-3p	hsa-miR-193a-3p/hsa-miR-193b-3p	hsa-miR-200a-3p	hsa-miR-23a-3p/hsa-miR-23b-3p	hsa-miR-301a-3p	hsa-miR-433-3p
EIF4E3	0.0580128	0.438573	0.567614	8	hsa-miR-142-5p	hsa-miR-148a-3p	hsa-miR-221-3p	hsa-miR-23a-3p/hsa-miR-23b-3p	hsa-miR-26a-5p/hsa-miR-26b-5p	hsa-miR-29b-3p	hsa-miR-301a-3p	hsa-miR-338-3p
MEIS2	0.0580128	0.438573	0.567614	8	hsa-let-7a-5p/hsa-let-7e-5p/hsa-let-7f-5p/hsa-let-7g-5p/hsa-miR-98-5p	hsa-miR-132-3p/hsa-miR-212-3p	hsa-miR-133b	hsa-miR-142-5p	hsa-miR-200a-3p	hsa-miR-22-3p	hsa-miR-23a-3p/hsa-miR-23b-3p	hsa-miR-27a-3p
MEX3A	0.0580128	0.438573	0.567614	8	hsa-let-7a-5p/hsa-let-7e-5p/hsa-let-7f-5p/hsa-let-7g-5p/hsa-miR-98-5p	hsa-miR-132-3p/hsa-miR-212-3p	hsa-miR-142-5p	hsa-miR-154-3p	hsa-miR-181c-5p	hsa-miR-221-3p	hsa-miR-22-3p	hsa-miR-342-3p
SMAD2	0.0580128	0.438573	0.567614	8	hsa-let-7a-5p/hsa-let-7e-5p/hsa-let-7f-5p/hsa-let-7g-5p/hsa-miR-98-5p	hsa-miR-132-3p/hsa-miR-212-3p	hsa-miR-142-5p	hsa-miR-148a-3p	hsa-miR-181c-5p	hsa-miR-27a-3p	hsa-miR-433-3p	hsa-miR-532-5p
USP46	0.0580128	0.438573	0.567614	8	hsa-miR-142-5p	hsa-miR-143-3p	hsa-miR-199a-5p	hsa-miR-22-3p	hsa-miR-23a-3p/hsa-miR-23b-3p	hsa-miR-27a-3p	hsa-miR-301a-3p	hsa-miR-532-5p
ARHGAP21	0.0593748	0.438573	0.398864	4	hsa-miR-148a-3p	hsa-miR-199a-5p	hsa-miR-26a-5p/hsa-miR-26b-5p	hsa-miR-27a-3p
BHLHE40	0.0593748	0.438573	0.398864	4	hsa-miR-181c-5p	hsa-miR-200a-3p	hsa-miR-26a-5p/hsa-miR-26b-5p	hsa-miR-301a-3p
CDC14A	0.0593748	0.438573	0.398864	4	hsa-miR-148a-3p	hsa-miR-15b-5p/hsa-miR-15b-5p	hsa-miR-200a-3p	hsa-miR-22-3p
CDYL	0.0593748	0.438573	0.398864	4	hsa-let-7a-5p/hsa-let-7e-5p/hsa-let-7f-5p/hsa-let-7g-5p/hsa-miR-98-5p	hsa-miR-142-5p	hsa-miR-181c-5p	hsa-miR-27a-3p
DIO2	0.0593748	0.438573	0.398864	4	hsa-miR-142-5p	hsa-miR-193a-3p/hsa-miR-193b-3p	hsa-miR-23a-3p/hsa-miR-23b-3p	hsa-miR-29b-3p
DNAJC13	0.0593748	0.438573	0.398864	4	hsa-miR-181c-5p	hsa-miR-193a-3p/hsa-miR-193b-3p	hsa-miR-200a-3p	hsa-miR-27a-3p
EGLN1	0.0593748	0.438573	0.398864	4	hsa-miR-143-3p	hsa-miR-15b-5p/hsa-miR-15b-5p	hsa-miR-200a-3p	hsa-miR-23a-3p/hsa-miR-23b-3p
GMPS	0.0593748	0.438573	0.398864	4	hsa-miR-181c-5p	hsa-miR-200a-3p	hsa-miR-23a-3p/hsa-miR-23b-3p	hsa-miR-27a-3p
HNF4G	0.0593748	0.438573	0.398864	4	hsa-miR-23a-3p/hsa-miR-23b-3p	hsa-miR-27a-3p	hsa-miR-29b-3p	hsa-miR-338-3p
HOXA1	0.0593748	0.438573	0.398864	4	hsa-let-7a-5p/hsa-let-7e-5p/hsa-let-7f-5p/hsa-let-7g-5p/hsa-miR-98-5p	hsa-miR-181c-5p	hsa-miR-23a-3p/hsa-miR-23b-3p	hsa-miR-433-3p
IGF2BP2	0.0593748	0.438573	0.398864	4	hsa-let-7a-5p/hsa-let-7e-5p/hsa-let-7f-5p/hsa-let-7g-5p/hsa-miR-98-5p	hsa-miR-181c-5p	hsa-miR-200a-3p	hsa-miR-221-3p
IQCJ-SCHIP1	0.0593748	0.438573	0.398864	4	hsa-miR-142-5p	hsa-miR-181c-5p	hsa-miR-200a-3p	hsa-miR-29b-3p
ISL1	0.0593748	0.438573	0.398864	4	hsa-miR-132-3p/hsa-miR-212-3p	hsa-miR-23a-3p/hsa-miR-23b-3p	hsa-miR-27a-3p	hsa-miR-29b-3p
KCNA6	0.0593748	0.438573	0.398864	4	hsa-let-7a-5p/hsa-let-7e-5p/hsa-let-7f-5p/hsa-let-7g-5p/hsa-miR-98-5p	hsa-miR-132-3p/hsa-miR-212-3p	hsa-miR-133b	hsa-miR-27a-3p
LLPH	0.0593748	0.438573	0.398864	4	hsa-miR-142-5p	hsa-miR-181c-5p	hsa-miR-221-3p	hsa-miR-26a-5p/hsa-miR-26b-5p
MAFB	0.0593748	0.438573	0.398864	4	hsa-miR-148a-3p	hsa-miR-29b-3p	hsa-miR-301a-3p	hsa-miR-338-3p
MFAP3	0.0593748	0.438573	0.398864	4	hsa-miR-103a-3p/hsa-miR-107	hsa-miR-143-3p	hsa-miR-26a-5p/hsa-miR-26b-5p	hsa-miR-29b-3p
MSN	0.0593748	0.438573	0.398864	4	hsa-let-7a-5p/hsa-let-7e-5p/hsa-let-7f-5p/hsa-let-7g-5p/hsa-miR-98-5p	hsa-miR-133b	hsa-miR-27a-3p	hsa-miR-338-3p
NEK6	0.0593748	0.438573	0.398864	4	hsa-miR-200a-3p	hsa-miR-23a-3p/hsa-miR-23b-3p	hsa-miR-26a-5p/hsa-miR-26b-5p	hsa-miR-27a-3p
NOP9	0.0593748	0.438573	0.398864	4	hsa-miR-193a-3p/hsa-miR-193b-3p	hsa-miR-221-3p	hsa-miR-22-3p	hsa-miR-26a-5p/hsa-miR-26b-5p
PELI2	0.0593748	0.438573	0.398864	4	hsa-miR-103a-3p/hsa-miR-107	hsa-miR-15b-5p/hsa-miR-15b-5p	hsa-miR-26a-5p/hsa-miR-26b-5p	hsa-miR-27a-3p
PLXND1	0.0593748	0.438573	0.398864	4	hsa-let-7a-5p/hsa-let-7e-5p/hsa-let-7f-5p/hsa-let-7g-5p/hsa-miR-98-5p	hsa-miR-142-5p	hsa-miR-199a-5p	hsa-miR-27a-3p
PRRC2C	0.0593748	0.438573	0.398864	4	hsa-miR-15b-5p/hsa-miR-15b-5p	hsa-miR-181c-5p	hsa-miR-27a-3p	hsa-miR-29b-3p
SBF2	0.0593748	0.438573	0.398864	4	hsa-miR-148a-3p	hsa-miR-27a-3p	hsa-miR-29b-3p	hsa-miR-301a-3p
SCHIP1	0.0593748	0.438573	0.398864	4	hsa-miR-142-5p	hsa-miR-181c-5p	hsa-miR-200a-3p	hsa-miR-29b-3p
SKOR1	0.0593748	0.438573	0.398864	4	hsa-miR-103a-3p/hsa-miR-107	hsa-miR-15b-5p/hsa-miR-15b-5p	hsa-miR-221-3p	hsa-miR-27a-3p
SLC39A10	0.0593748	0.438573	0.398864	4	hsa-miR-143-3p	hsa-miR-15b-5p/hsa-miR-15b-5p	hsa-miR-23a-3p/hsa-miR-23b-3p	hsa-miR-301a-3p
SOGA2	0.0593748	0.438573	0.398864	4	hsa-miR-148a-3p	hsa-miR-181c-5p	hsa-miR-200a-3p	hsa-miR-301a-3p
STXBP6	0.0593748	0.438573	0.398864	4	hsa-miR-133b	hsa-miR-181c-5p	hsa-miR-23a-3p/hsa-miR-23b-3p	hsa-miR-27a-3p
TENM2	0.0593748	0.438573	0.398864	4	hsa-let-7a-5p/hsa-let-7e-5p/hsa-let-7f-5p/hsa-let-7g-5p/hsa-miR-98-5p	hsa-miR-15b-5p/hsa-miR-15b-5p	hsa-miR-199a-5p	hsa-miR-502-3p
TGOLN2	0.0593748	0.438573	0.398864	4	hsa-miR-133b	hsa-miR-27a-3p	hsa-miR-301a-3p	hsa-miR-338-3p
TSPAN18	0.0593748	0.438573	0.398864	4	hsa-let-7a-5p/hsa-let-7e-5p/hsa-let-7f-5p/hsa-let-7g-5p/hsa-miR-98-5p	hsa-miR-133b	hsa-miR-148a-3p	hsa-miR-301a-3p
ESRRG	0.0607127	0.438573	0.6	9	hsa-miR-132-3p/hsa-miR-212-3p	hsa-miR-133b	hsa-miR-143-3p	hsa-miR-148a-3p	hsa-miR-15b-5p/hsa-miR-15b-5p	hsa-miR-200a-3p	hsa-miR-23a-3p/hsa-miR-23b-3p	hsa-miR-26a-5p/hsa-miR-26b-5p	hsa-miR-502-3p
PLXNC1	0.0607127	0.438573	0.6	9	hsa-let-7a-5p/hsa-let-7e-5p/hsa-let-7f-5p/hsa-let-7g-5p/hsa-miR-98-5p	hsa-miR-15b-5p/hsa-miR-15b-5p	hsa-miR-181c-5p	hsa-miR-193a-3p/hsa-miR-193b-3p	hsa-miR-199a-5p	hsa-miR-200a-3p	hsa-miR-221-3p	hsa-miR-23a-3p/hsa-miR-23b-3p	hsa-miR-29b-3p
RLIM	0.0607127	0.438573	0.6	9	hsa-miR-142-5p	hsa-miR-143-3p	hsa-miR-148a-3p	hsa-miR-15b-5p/hsa-miR-15b-5p	hsa-miR-181c-5p	hsa-miR-199a-5p	hsa-miR-27a-3p	hsa-miR-29b-3p	hsa-miR-301a-3p
SYNCRIP	0.0607127	0.438573	0.6	9	hsa-let-7a-5p/hsa-let-7e-5p/hsa-let-7f-5p/hsa-let-7g-5p/hsa-miR-98-5p	hsa-miR-142-5p	hsa-miR-148a-3p	hsa-miR-200a-3p	hsa-miR-221-3p	hsa-miR-26a-5p/hsa-miR-26b-5p	hsa-miR-29b-3p	hsa-miR-301a-3p	hsa-miR-433-3p
ARMC1	0.0608341	0.438573	0.327273	3	hsa-miR-103a-3p/hsa-miR-107	hsa-miR-193a-3p/hsa-miR-193b-3p	hsa-miR-433-3p
ATG9A	0.0608341	0.438573	0.327273	3	hsa-miR-15b-5p/hsa-miR-15b-5p	hsa-miR-29b-3p	hsa-miR-338-3p
AXIN2	0.0608341	0.438573	0.327273	3	hsa-miR-103a-3p/hsa-miR-107	hsa-miR-15b-5p/hsa-miR-15b-5p	hsa-miR-221-3p
C12orf49	0.0608341	0.438573	0.327273	3	hsa-miR-15b-5p/hsa-miR-15b-5p	hsa-miR-23a-3p/hsa-miR-23b-3p	hsa-miR-27a-3p
CCDC92	0.0608341	0.438573	0.327273	3	hsa-miR-142-5p	hsa-miR-181c-5p	hsa-miR-27a-3p
CDKN1C	0.0608341	0.438573	0.327273	3	hsa-miR-199a-5p	hsa-miR-221-3p	hsa-miR-26a-5p/hsa-miR-26b-5p
CEBPG	0.0608341	0.438573	0.327273	3	hsa-miR-148a-3p	hsa-miR-26a-5p/hsa-miR-26b-5p	hsa-miR-342-3p
CEP72	0.0608341	0.438573	0.327273	3	hsa-miR-103a-3p/hsa-miR-107	hsa-miR-148a-3p	hsa-miR-199a-5p
COG5	0.0608341	0.438573	0.327273	3	hsa-miR-148a-3p	hsa-miR-301a-3p	hsa-miR-433-3p
COL24A1	0.0608341	0.438573	0.327273	3	hsa-let-7a-5p/hsa-let-7e-5p/hsa-let-7f-5p/hsa-let-7g-5p/hsa-miR-98-5p	hsa-miR-15b-5p/hsa-miR-15b-5p	hsa-miR-29b-3p
DIDO1	0.0608341	0.438573	0.327273	3	hsa-miR-142-5p	hsa-miR-26a-5p/hsa-miR-26b-5p	hsa-miR-27a-3p
FAM193B	0.0608341	0.438573	0.327273	3	hsa-miR-133b	hsa-miR-27a-3p	hsa-miR-29b-3p
FAM98A	0.0608341	0.438573	0.327273	3	hsa-miR-103a-3p/hsa-miR-107	hsa-miR-26a-5p/hsa-miR-26b-5p	hsa-miR-27a-3p
FKBP1A	0.0608341	0.438573	0.327273	3	hsa-miR-15b-5p/hsa-miR-15b-5p	hsa-miR-181c-5p	hsa-miR-338-3p
GABARAPL1	0.0608341	0.438573	0.327273	3	hsa-miR-133b	hsa-miR-143-3p	hsa-miR-15b-5p/hsa-miR-15b-5p
GPR6	0.0608341	0.438573	0.327273	3	hsa-miR-103a-3p/hsa-miR-107	hsa-miR-142-5p	hsa-miR-200a-3p
H3F3C	0.0608341	0.438573	0.327273	3	hsa-miR-132-3p/hsa-miR-212-3p	hsa-miR-22-3p	hsa-miR-27a-3p
HAUS3	0.0608341	0.438573	0.327273	3	hsa-miR-181c-5p	hsa-miR-200a-3p	hsa-miR-338-3p
HDGF	0.0608341	0.438573	0.327273	3	hsa-miR-148a-3p	hsa-miR-15b-5p/hsa-miR-15b-5p	hsa-miR-29b-3p
INPP5A	0.0608341	0.438573	0.327273	3	hsa-let-7a-5p/hsa-let-7e-5p/hsa-let-7f-5p/hsa-let-7g-5p/hsa-miR-98-5p	hsa-miR-181c-5p	hsa-miR-23a-3p/hsa-miR-23b-3p
INTS2	0.0608341	0.438573	0.327273	3	hsa-let-7a-5p/hsa-let-7e-5p/hsa-let-7f-5p/hsa-let-7g-5p/hsa-miR-98-5p	hsa-miR-26a-5p/hsa-miR-26b-5p	hsa-miR-433-3p
KDR	0.0608341	0.438573	0.327273	3	hsa-miR-15b-5p/hsa-miR-15b-5p	hsa-miR-221-3p	hsa-miR-338-3p
LAS1L	0.0608341	0.438573	0.327273	3	hsa-miR-127-3p	hsa-miR-22-3p	hsa-miR-338-3p
LGALS8	0.0608341	0.438573	0.327273	3	hsa-miR-133b	hsa-miR-148a-3p	hsa-miR-23a-3p/hsa-miR-23b-3p
MAX	0.0608341	0.438573	0.327273	3	hsa-miR-148a-3p	hsa-miR-199a-5p	hsa-miR-22-3p
MPPED1	0.0608341	0.438573	0.327273	3	hsa-miR-133b	hsa-miR-143-3p	hsa-miR-22-3p
MTPN	0.0608341	0.438573	0.327273	3	hsa-miR-181c-5p	hsa-miR-200a-3p	hsa-miR-26a-5p/hsa-miR-26b-5p
MUM1L1	0.0608341	0.438573	0.327273	3	hsa-miR-148a-3p	hsa-miR-22-3p	hsa-miR-301a-3p
NADK2	0.0608341	0.438573	0.327273	3	hsa-miR-142-5p	hsa-miR-23a-3p/hsa-miR-23b-3p	hsa-miR-433-3p
NEURL4	0.0608341	0.438573	0.327273	3	hsa-miR-148a-3p	hsa-miR-191-5p	hsa-miR-27a-3p
PEX5	0.0608341	0.438573	0.327273	3	hsa-miR-15b-5p/hsa-miR-15b-5p	hsa-miR-200a-3p	hsa-miR-29b-3p
PRELID2	0.0608341	0.438573	0.327273	3	hsa-miR-200a-3p	hsa-miR-23a-3p/hsa-miR-23b-3p	hsa-miR-27a-3p
PTGFR	0.0608341	0.438573	0.327273	3	hsa-miR-15b-5p/hsa-miR-15b-5p	hsa-miR-23a-3p/hsa-miR-23b-3p	hsa-miR-27a-3p
RAB12	0.0608341	0.438573	0.327273	3	hsa-miR-148a-3p	hsa-miR-29b-3p	hsa-miR-301a-3p
RBBP6	0.0608341	0.438573	0.327273	3	hsa-miR-103a-3p/hsa-miR-107	hsa-miR-142-5p	hsa-miR-15b-5p/hsa-miR-15b-5p
RNF213	0.0608341	0.438573	0.327273	3	hsa-miR-15b-5p/hsa-miR-15b-5p	hsa-miR-26a-5p/hsa-miR-26b-5p	hsa-miR-301a-3p
RNF43	0.0608341	0.438573	0.327273	3	hsa-miR-15b-5p/hsa-miR-15b-5p	hsa-miR-181c-5p	hsa-miR-23a-3p/hsa-miR-23b-3p
SARM1	0.0608341	0.438573	0.327273	3	hsa-miR-29b-3p	hsa-miR-338-3p	hsa-miR-342-3p
SCAF8	0.0608341	0.438573	0.327273	3	hsa-miR-103a-3p/hsa-miR-107	hsa-miR-143-3p	hsa-miR-200a-3p
SH3RF3	0.0608341	0.438573	0.327273	3	hsa-let-7a-5p/hsa-let-7e-5p/hsa-let-7f-5p/hsa-let-7g-5p/hsa-miR-98-5p	hsa-miR-142-5p	hsa-miR-29b-3p
SHROOM2	0.0608341	0.438573	0.327273	3	hsa-miR-23a-3p/hsa-miR-23b-3p	hsa-miR-27a-3p	hsa-miR-29b-3p
SLC25A15	0.0608341	0.438573	0.327273	3	hsa-miR-142-5p	hsa-miR-143-3p	hsa-miR-29b-3p
SLC35F3	0.0608341	0.438573	0.327273	3	hsa-miR-181c-5p	hsa-miR-27a-3p	hsa-miR-301a-3p
SNAI1	0.0608341	0.438573	0.327273	3	hsa-miR-199a-5p	hsa-miR-22-3p	hsa-miR-27a-3p
SYT4	0.0608341	0.438573	0.327273	3	hsa-miR-15b-5p/hsa-miR-15b-5p	hsa-miR-200a-3p	hsa-miR-23a-3p/hsa-miR-23b-3p
THOC2	0.0608341	0.438573	0.327273	3	hsa-let-7a-5p/hsa-let-7e-5p/hsa-let-7f-5p/hsa-let-7g-5p/hsa-miR-98-5p	hsa-miR-103a-3p/hsa-miR-107	hsa-miR-200a-3p
THUMPD3	0.0608341	0.438573	0.327273	3	hsa-miR-133b	hsa-miR-199a-5p	hsa-miR-23a-3p/hsa-miR-23b-3p
TMEM259	0.0608341	0.438573	0.327273	3	hsa-miR-103a-3p/hsa-miR-107	hsa-miR-15b-5p/hsa-miR-15b-5p	hsa-miR-29b-3p
TOPBP1	0.0608341	0.438573	0.327273	3	hsa-miR-181c-5p	hsa-miR-23a-3p/hsa-miR-23b-3p	hsa-miR-27a-3p
TRANK1	0.0608341	0.438573	0.327273	3	hsa-let-7a-5p/hsa-let-7e-5p/hsa-let-7f-5p/hsa-let-7g-5p/hsa-miR-98-5p	hsa-miR-15b-5p/hsa-miR-15b-5p	hsa-miR-181c-5p
TRIM3	0.0608341	0.438573	0.327273	3	hsa-miR-142-5p	hsa-miR-181c-5p	hsa-miR-301a-3p
TSPYL1	0.0608341	0.438573	0.327273	3	hsa-miR-148a-3p	hsa-miR-199a-5p	hsa-miR-338-3p
TSPYL5	0.0608341	0.438573	0.327273	3	hsa-let-7a-5p/hsa-let-7e-5p/hsa-let-7f-5p/hsa-let-7g-5p/hsa-miR-98-5p	hsa-miR-27a-3p	hsa-miR-338-3p
TXNIP	0.0608341	0.438573	0.327273	3	hsa-miR-148a-3p	hsa-miR-15b-5p/hsa-miR-15b-5p	hsa-miR-301a-3p
USP27X	0.0608341	0.438573	0.327273	3	hsa-miR-154-3p	hsa-miR-199a-5p	hsa-miR-26a-5p/hsa-miR-26b-5p
USP53	0.0608341	0.438573	0.327273	3	hsa-miR-200a-3p	hsa-miR-23a-3p/hsa-miR-23b-3p	hsa-miR-26a-5p/hsa-miR-26b-5p
VPS26A	0.0608341	0.438573	0.327273	3	hsa-miR-142-5p	hsa-miR-199a-5p	hsa-miR-23a-3p/hsa-miR-23b-3p
MAP3K2	0.061577	0.438573	0.625909	10	hsa-let-7a-5p/hsa-let-7e-5p/hsa-let-7f-5p/hsa-let-7g-5p/hsa-miR-98-5p	hsa-miR-133b	hsa-miR-148a-3p	hsa-miR-181c-5p	hsa-miR-200a-3p	hsa-miR-221-3p	hsa-miR-26a-5p/hsa-miR-26b-5p	hsa-miR-29b-3p	hsa-miR-338-3p	hsa-miR-433-3p
BTBD7	0.0624176	0.438573	0.543506	7	hsa-miR-132-3p/hsa-miR-212-3p	hsa-miR-142-5p	hsa-miR-23a-3p/hsa-miR-23b-3p	hsa-miR-26a-5p/hsa-miR-26b-5p	hsa-miR-29b-3p	hsa-miR-301a-3p	hsa-miR-342-3p
ETV1	0.0624176	0.438573	0.543506	7	hsa-miR-132-3p/hsa-miR-212-3p	hsa-miR-142-5p	hsa-miR-148a-3p	hsa-miR-15b-5p/hsa-miR-15b-5p	hsa-miR-193a-3p/hsa-miR-193b-3p	hsa-miR-22-3p	hsa-miR-23a-3p/hsa-miR-23b-3p
FUT9	0.0624176	0.438573	0.543506	7	hsa-miR-148a-3p	hsa-miR-199a-5p	hsa-miR-22-3p	hsa-miR-23a-3p/hsa-miR-23b-3p	hsa-miR-26a-5p/hsa-miR-26b-5p	hsa-miR-27a-3p	hsa-miR-301a-3p
PDGFRA	0.0624176	0.438573	0.543506	7	hsa-miR-132-3p/hsa-miR-212-3p	hsa-miR-142-5p	hsa-miR-143-3p	hsa-miR-181c-5p	hsa-miR-27a-3p	hsa-miR-301a-3p	hsa-miR-342-3p
RNF152	0.0624176	0.438573	0.543506	7	hsa-let-7a-5p/hsa-let-7e-5p/hsa-let-7f-5p/hsa-let-7g-5p/hsa-miR-98-5p	hsa-miR-103a-3p/hsa-miR-107	hsa-miR-143-3p	hsa-miR-15b-5p/hsa-miR-15b-5p	hsa-miR-181c-5p	hsa-miR-27a-3p	hsa-miR-29b-3p
SNX30	0.0624176	0.438573	0.543506	7	hsa-let-7a-5p/hsa-let-7e-5p/hsa-let-7f-5p/hsa-let-7g-5p/hsa-miR-98-5p	hsa-miR-103a-3p/hsa-miR-107	hsa-miR-133b	hsa-miR-181c-5p	hsa-miR-23a-3p/hsa-miR-23b-3p	hsa-miR-26a-5p/hsa-miR-26b-5p	hsa-miR-338-3p
TP53INP1	0.0624176	0.438573	0.543506	7	hsa-miR-142-5p	hsa-miR-15b-5p/hsa-miR-15b-5p	hsa-miR-193a-3p/hsa-miR-193b-3p	hsa-miR-200a-3p	hsa-miR-22-3p	hsa-miR-26a-5p/hsa-miR-26b-5p	hsa-miR-29b-3p
AIFM1	0.0651895	0.438573	0.466364	5	hsa-let-7a-5p/hsa-let-7e-5p/hsa-let-7f-5p/hsa-let-7g-5p/hsa-miR-98-5p	hsa-miR-103a-3p/hsa-miR-107	hsa-miR-15b-5p/hsa-miR-15b-5p	hsa-miR-22-3p	hsa-miR-433-3p
BAI3	0.0651895	0.438573	0.466364	5	hsa-miR-103a-3p/hsa-miR-107	hsa-miR-142-5p	hsa-miR-148a-3p	hsa-miR-181c-5p	hsa-miR-301a-3p
CD2AP	0.0651895	0.438573	0.466364	5	hsa-miR-15b-5p/hsa-miR-15b-5p	hsa-miR-181c-5p	hsa-miR-221-3p	hsa-miR-27a-3p	hsa-miR-301a-3p
CSRNP2	0.0651895	0.438573	0.466364	5	hsa-miR-15b-5p/hsa-miR-15b-5p	hsa-miR-199a-5p	hsa-miR-23a-3p/hsa-miR-23b-3p	hsa-miR-26a-5p/hsa-miR-26b-5p	hsa-miR-29b-3p
DDX5	0.0651895	0.438573	0.466364	5	hsa-miR-142-5p	hsa-miR-181c-5p	hsa-miR-199a-5p	hsa-miR-200a-3p	hsa-miR-23a-3p/hsa-miR-23b-3p
FRYL	0.0651895	0.438573	0.466364	5	hsa-miR-103a-3p/hsa-miR-107	hsa-miR-148a-3p	hsa-miR-15b-5p/hsa-miR-15b-5p	hsa-miR-181c-5p	hsa-miR-27a-3p
ID4	0.0651895	0.438573	0.466364	5	hsa-miR-133b	hsa-miR-23a-3p/hsa-miR-23b-3p	hsa-miR-27a-3p	hsa-miR-342-3p	hsa-miR-532-5p
ITGA6	0.0651895	0.438573	0.466364	5	hsa-miR-127-3p	hsa-miR-143-3p	hsa-miR-181c-5p	hsa-miR-26a-5p/hsa-miR-26b-5p	hsa-miR-29b-3p
ITPRIPL2	0.0651895	0.438573	0.466364	5	hsa-miR-133b	hsa-miR-15b-5p/hsa-miR-15b-5p	hsa-miR-200a-3p	hsa-miR-301a-3p	hsa-miR-342-3p
LGALSL	0.0651895	0.438573	0.466364	5	hsa-miR-181c-5p	hsa-miR-200a-3p	hsa-miR-221-3p	hsa-miR-301a-3p	hsa-miR-338-3p
MTSS1L	0.0651895	0.438573	0.466364	5	hsa-miR-127-3p	hsa-miR-142-5p	hsa-miR-148a-3p	hsa-miR-27a-3p	hsa-miR-29b-3p
NHS	0.0651895	0.438573	0.466364	5	hsa-miR-148a-3p	hsa-miR-26a-5p/hsa-miR-26b-5p	hsa-miR-27a-3p	hsa-miR-301a-3p	hsa-miR-338-3p
PITPNM3	0.0651895	0.438573	0.466364	5	hsa-let-7a-5p/hsa-let-7e-5p/hsa-let-7f-5p/hsa-let-7g-5p/hsa-miR-98-5p	hsa-miR-133b	hsa-miR-15b-5p/hsa-miR-15b-5p	hsa-miR-191-5p	hsa-miR-29b-3p
PPIP5K2	0.0651895	0.438573	0.466364	5	hsa-miR-103a-3p/hsa-miR-107	hsa-miR-142-5p	hsa-miR-15b-5p/hsa-miR-15b-5p	hsa-miR-181c-5p	hsa-miR-29b-3p
SIK1	0.0651895	0.438573	0.466364	5	hsa-miR-148a-3p	hsa-miR-15b-5p/hsa-miR-15b-5p	hsa-miR-200a-3p	hsa-miR-27a-3p	hsa-miR-301a-3p
SLC16A7	0.0651895	0.438573	0.466364	5	hsa-miR-143-3p	hsa-miR-181c-5p	hsa-miR-200a-3p	hsa-miR-27a-3p	hsa-miR-29b-3p
SREK1IP1	0.0651895	0.438573	0.466364	5	hsa-let-7a-5p/hsa-let-7e-5p/hsa-let-7f-5p/hsa-let-7g-5p/hsa-miR-98-5p	hsa-miR-200a-3p	hsa-miR-23a-3p/hsa-miR-23b-3p	hsa-miR-27a-3p	hsa-miR-433-3p
TERF2	0.0651895	0.438573	0.466364	5	hsa-miR-148a-3p	hsa-miR-199a-5p	hsa-miR-221-3p	hsa-miR-301a-3p	hsa-miR-338-3p
TOX	0.0651895	0.438573	0.466364	5	hsa-miR-142-5p	hsa-miR-181c-5p	hsa-miR-221-3p	hsa-miR-23a-3p/hsa-miR-23b-3p	hsa-miR-27a-3p
WDTC1	0.0651895	0.438573	0.466364	5	hsa-miR-133b	hsa-miR-15b-5p/hsa-miR-15b-5p	hsa-miR-199a-5p	hsa-miR-22-3p	hsa-miR-27a-3p
BTBD3	0.0652709	0.438573	0.511364	6	hsa-let-7a-5p/hsa-let-7e-5p/hsa-let-7f-5p/hsa-let-7g-5p/hsa-miR-98-5p	hsa-miR-133b	hsa-miR-148a-3p	hsa-miR-181c-5p	hsa-miR-199a-5p	hsa-miR-301a-3p
CAMK2G	0.0652709	0.438573	0.511364	6	hsa-miR-103a-3p/hsa-miR-107	hsa-miR-181c-5p	hsa-miR-22-3p	hsa-miR-29b-3p	hsa-miR-338-3p	hsa-miR-532-5p
CAPRIN1	0.0652709	0.438573	0.511364	6	hsa-miR-132-3p/hsa-miR-212-3p	hsa-miR-148a-3p	hsa-miR-15b-5p/hsa-miR-15b-5p	hsa-miR-193a-3p/hsa-miR-193b-3p	hsa-miR-199a-5p	hsa-miR-23a-3p/hsa-miR-23b-3p
DIAPH2	0.0652709	0.438573	0.511364	6	hsa-let-7a-5p/hsa-let-7e-5p/hsa-let-7f-5p/hsa-let-7g-5p/hsa-miR-98-5p	hsa-miR-103a-3p/hsa-miR-107	hsa-miR-133b	hsa-miR-142-5p	hsa-miR-15b-5p/hsa-miR-15b-5p	hsa-miR-29b-3p
LYSMD3	0.0652709	0.438573	0.511364	6	hsa-miR-148a-3p	hsa-miR-199a-5p	hsa-miR-200a-3p	hsa-miR-27a-3p	hsa-miR-301a-3p	hsa-miR-502-3p
MECP2	0.0652709	0.438573	0.511364	6	hsa-miR-132-3p/hsa-miR-212-3p	hsa-miR-133b	hsa-miR-148a-3p	hsa-miR-181c-5p	hsa-miR-22-3p	hsa-miR-301a-3p
POU4F1	0.0652709	0.438573	0.511364	6	hsa-miR-133b	hsa-miR-200a-3p	hsa-miR-26a-5p/hsa-miR-26b-5p	hsa-miR-27a-3p	hsa-miR-301a-3p	hsa-miR-433-3p
PTBP2	0.0652709	0.438573	0.511364	6	hsa-miR-132-3p/hsa-miR-212-3p	hsa-miR-133b	hsa-miR-181c-5p	hsa-miR-221-3p	hsa-miR-301a-3p	hsa-miR-502-3p
USP6NL	0.0652709	0.438573	0.511364	6	hsa-miR-103a-3p/hsa-miR-107	hsa-miR-15b-5p/hsa-miR-15b-5p	hsa-miR-181c-5p	hsa-miR-221-3p	hsa-miR-23a-3p/hsa-miR-23b-3p	hsa-miR-29b-3p
YWHAG	0.0652709	0.438573	0.511364	6	hsa-miR-132-3p/hsa-miR-212-3p	hsa-miR-181c-5p	hsa-miR-200a-3p	hsa-miR-221-3p	hsa-miR-23a-3p/hsa-miR-23b-3p	hsa-miR-433-3p
CPEB2	0.0671409	0.438573	0.582955	8	hsa-let-7a-5p/hsa-let-7e-5p/hsa-let-7f-5p/hsa-let-7g-5p/hsa-miR-98-5p	hsa-miR-142-5p	hsa-miR-143-3p	hsa-miR-15b-5p/hsa-miR-15b-5p	hsa-miR-23a-3p/hsa-miR-23b-3p	hsa-miR-26a-5p/hsa-miR-26b-5p	hsa-miR-301a-3p	hsa-miR-502-3p
ZBTB20	0.0683993	0.438573	0.758021	17	hsa-miR-103a-3p/hsa-miR-107	hsa-miR-132-3p/hsa-miR-212-3p	hsa-miR-133b	hsa-miR-142-5p	hsa-miR-143-3p	hsa-miR-148a-3p	hsa-miR-15b-5p/hsa-miR-15b-5p	hsa-miR-181c-5p	hsa-miR-199a-5p	hsa-miR-200a-3p	hsa-miR-26a-5p/hsa-miR-26b-5p	hsa-miR-27a-3p	hsa-miR-29b-3p	hsa-miR-301a-3p	hsa-miR-338-3p	hsa-miR-433-3p	hsa-miR-502-3p
TET3	0.0687024	0.438573	0.658264	11	hsa-let-7a-5p/hsa-let-7e-5p/hsa-let-7f-5p/hsa-let-7g-5p/hsa-miR-98-5p	hsa-miR-133b	hsa-miR-15b-5p/hsa-miR-15b-5p	hsa-miR-200a-3p	hsa-miR-23a-3p/hsa-miR-23b-3p	hsa-miR-26a-5p/hsa-miR-26b-5p	hsa-miR-27a-3p	hsa-miR-29b-3p	hsa-miR-301a-3p	hsa-miR-433-3p	hsa-miR-502-3p
TMEM178B	0.0693814	0.438573	0.613636	9	hsa-let-7a-5p/hsa-let-7e-5p/hsa-let-7f-5p/hsa-let-7g-5p/hsa-miR-98-5p	hsa-miR-132-3p/hsa-miR-212-3p	hsa-miR-154-3p	hsa-miR-15b-5p/hsa-miR-15b-5p	hsa-miR-181c-5p	hsa-miR-199a-5p	hsa-miR-23a-3p/hsa-miR-23b-3p	hsa-miR-26a-5p/hsa-miR-26b-5p	hsa-miR-29b-3p
CADM1	0.069758	0.438573	0.638182	10	hsa-miR-142-5p	hsa-miR-148a-3p	hsa-miR-15b-5p/hsa-miR-15b-5p	hsa-miR-193a-3p/hsa-miR-193b-3p	hsa-miR-200a-3p	hsa-miR-22-3p	hsa-miR-23a-3p/hsa-miR-23b-3p	hsa-miR-27a-3p	hsa-miR-338-3p	hsa-miR-502-3p
FMR1	0.0729673	0.438573	0.561039	7	hsa-miR-142-5p	hsa-miR-148a-3p	hsa-miR-154-3p	hsa-miR-181c-5p	hsa-miR-221-3p	hsa-miR-23a-3p/hsa-miR-23b-3p	hsa-miR-301a-3p
KIAA1549	0.0729673	0.438573	0.561039	7	hsa-let-7a-5p/hsa-let-7e-5p/hsa-let-7f-5p/hsa-let-7g-5p/hsa-miR-98-5p	hsa-miR-132-3p/hsa-miR-212-3p	hsa-miR-133b	hsa-miR-148a-3p	hsa-miR-15b-5p/hsa-miR-15b-5p	hsa-miR-27a-3p	hsa-miR-29b-3p
LNPEP	0.0729673	0.438573	0.561039	7	hsa-miR-142-5p	hsa-miR-148a-3p	hsa-miR-154-3p	hsa-miR-26a-5p/hsa-miR-26b-5p	hsa-miR-29b-3p	hsa-miR-301a-3p	hsa-miR-532-5p
PAPOLG	0.0729673	0.438573	0.561039	7	hsa-miR-181c-5p	hsa-miR-200a-3p	hsa-miR-221-3p	hsa-miR-23a-3p/hsa-miR-23b-3p	hsa-miR-29b-3p	hsa-miR-433-3p	hsa-miR-532-5p
PLCXD3	0.0729673	0.438573	0.561039	7	hsa-let-7a-5p/hsa-let-7e-5p/hsa-let-7f-5p/hsa-let-7g-5p/hsa-miR-98-5p	hsa-miR-181c-5p	hsa-miR-200a-3p	hsa-miR-221-3p	hsa-miR-22-3p	hsa-miR-23a-3p/hsa-miR-23b-3p	hsa-miR-26a-5p/hsa-miR-26b-5p
SRGAP3	0.0729673	0.438573	0.561039	7	hsa-let-7a-5p/hsa-let-7e-5p/hsa-let-7f-5p/hsa-let-7g-5p/hsa-miR-98-5p	hsa-miR-132-3p/hsa-miR-212-3p	hsa-miR-133b	hsa-miR-199a-5p	hsa-miR-23a-3p/hsa-miR-23b-3p	hsa-miR-27a-3p	hsa-miR-338-3p
ZNF516	0.0729673	0.438573	0.561039	7	hsa-let-7a-5p/hsa-let-7e-5p/hsa-let-7f-5p/hsa-let-7g-5p/hsa-miR-98-5p	hsa-miR-132-3p/hsa-miR-212-3p	hsa-miR-142-5p	hsa-miR-199a-5p	hsa-miR-200a-3p	hsa-miR-26a-5p/hsa-miR-26b-5p	hsa-miR-27a-3p
ZNRF3	0.0729673	0.438573	0.561039	7	hsa-miR-103a-3p/hsa-miR-107	hsa-miR-133b	hsa-miR-15b-5p/hsa-miR-15b-5p	hsa-miR-23a-3p/hsa-miR-23b-3p	hsa-miR-26a-5p/hsa-miR-26b-5p	hsa-miR-301a-3p	hsa-miR-342-3p
TAOK1	0.0743061	0.438573	0.685227	12	hsa-let-7a-5p/hsa-let-7e-5p/hsa-let-7f-5p/hsa-let-7g-5p/hsa-miR-98-5p	hsa-miR-103a-3p/hsa-miR-107	hsa-miR-133b	hsa-miR-15b-5p/hsa-miR-15b-5p	hsa-miR-181c-5p	hsa-miR-193a-3p/hsa-miR-193b-3p	hsa-miR-199a-5p	hsa-miR-221-3p	hsa-miR-23a-3p/hsa-miR-23b-3p	hsa-miR-26a-5p/hsa-miR-26b-5p	hsa-miR-27a-3p	hsa-miR-301a-3p
ACAP3	0.0746093	0.438573	0.245455	2	hsa-let-7a-5p/hsa-let-7e-5p/hsa-let-7f-5p/hsa-let-7g-5p/hsa-miR-98-5p	hsa-miR-193a-3p/hsa-miR-193b-3p
ACLY	0.0746093	0.438573	0.245455	2	hsa-miR-22-3p	hsa-miR-27a-3p
ACTG1	0.0746093	0.438573	0.245455	2	hsa-miR-103a-3p/hsa-miR-107	hsa-miR-199a-5p
AFF2	0.0746093	0.438573	0.245455	2	hsa-let-7a-5p/hsa-let-7e-5p/hsa-let-7f-5p/hsa-let-7g-5p/hsa-miR-98-5p	hsa-miR-132-3p/hsa-miR-212-3p
ANKRD46	0.0746093	0.438573	0.245455	2	hsa-let-7a-5p/hsa-let-7e-5p/hsa-let-7f-5p/hsa-let-7g-5p/hsa-miR-98-5p	hsa-miR-133b
APAF1	0.0746093	0.438573	0.245455	2	hsa-miR-23a-3p/hsa-miR-23b-3p	hsa-miR-27a-3p
ARHGAP28	0.0746093	0.438573	0.245455	2	hsa-let-7a-5p/hsa-let-7e-5p/hsa-let-7f-5p/hsa-let-7g-5p/hsa-miR-98-5p	hsa-miR-221-3p
ARL6IP6	0.0746093	0.438573	0.245455	2	hsa-let-7a-5p/hsa-let-7e-5p/hsa-let-7f-5p/hsa-let-7g-5p/hsa-miR-98-5p	hsa-miR-26a-5p/hsa-miR-26b-5p
ARMC5	0.0746093	0.438573	0.245455	2	hsa-miR-15b-5p/hsa-miR-15b-5p	hsa-miR-22-3p
ARPC5	0.0746093	0.438573	0.245455	2	hsa-miR-133b	hsa-miR-22-3p
ASAH2	0.0746093	0.438573	0.245455	2	hsa-miR-181c-5p	hsa-miR-23a-3p/hsa-miR-23b-3p
ATP6AP2	0.0746093	0.438573	0.245455	2	hsa-miR-133b	hsa-miR-148a-3p
BARHL2	0.0746093	0.438573	0.245455	2	hsa-miR-148a-3p	hsa-miR-301a-3p
BEST1	0.0746093	0.438573	0.245455	2	hsa-miR-148a-3p	hsa-miR-193a-3p/hsa-miR-193b-3p
BOLA3	0.0746093	0.438573	0.245455	2	hsa-miR-103a-3p/hsa-miR-107	hsa-miR-15b-5p/hsa-miR-15b-5p
C10orf137	0.0746093	0.438573	0.245455	2	hsa-miR-26a-5p/hsa-miR-26b-5p	hsa-miR-27a-3p
C1orf115	0.0746093	0.438573	0.245455	2	hsa-miR-132-3p/hsa-miR-212-3p	hsa-miR-143-3p
C1orf50	0.0746093	0.438573	0.245455	2	hsa-miR-148a-3p	hsa-miR-181c-5p
C22orf29	0.0746093	0.438573	0.245455	2	hsa-miR-27a-3p	hsa-miR-342-3p
CARD10	0.0746093	0.438573	0.245455	2	hsa-miR-15b-5p/hsa-miR-15b-5p	hsa-miR-181c-5p
CASP7	0.0746093	0.438573	0.245455	2	hsa-miR-23a-3p/hsa-miR-23b-3p	hsa-miR-29b-3p
CCDC28A	0.0746093	0.438573	0.245455	2	hsa-miR-15b-5p/hsa-miR-15b-5p	hsa-miR-26a-5p/hsa-miR-26b-5p
CCDC28B	0.0746093	0.438573	0.245455	2	hsa-miR-27a-3p	hsa-miR-29b-3p
CCM2	0.0746093	0.438573	0.245455	2	hsa-miR-23a-3p/hsa-miR-23b-3p	hsa-miR-27a-3p
CCNF	0.0746093	0.438573	0.245455	2	hsa-let-7a-5p/hsa-let-7e-5p/hsa-let-7f-5p/hsa-let-7g-5p/hsa-miR-98-5p	hsa-miR-23a-3p/hsa-miR-23b-3p
CFDP1	0.0746093	0.438573	0.245455	2	hsa-miR-23a-3p/hsa-miR-23b-3p	hsa-miR-27a-3p
CHMP4B	0.0746093	0.438573	0.245455	2	hsa-miR-148a-3p	hsa-miR-301a-3p
CIT	0.0746093	0.438573	0.245455	2	hsa-miR-142-5p	hsa-miR-502-3p
COL10A1	0.0746093	0.438573	0.245455	2	hsa-miR-26a-5p/hsa-miR-26b-5p	hsa-miR-502-3p
COL11A2	0.0746093	0.438573	0.245455	2	hsa-miR-23a-3p/hsa-miR-23b-3p	hsa-miR-27a-3p
COL2A1	0.0746093	0.438573	0.245455	2	hsa-miR-148a-3p	hsa-miR-29b-3p
COL4A2	0.0746093	0.438573	0.245455	2	hsa-let-7a-5p/hsa-let-7e-5p/hsa-let-7f-5p/hsa-let-7g-5p/hsa-miR-98-5p	hsa-miR-29b-3p
COL4A5	0.0746093	0.438573	0.245455	2	hsa-let-7a-5p/hsa-let-7e-5p/hsa-let-7f-5p/hsa-let-7g-5p/hsa-miR-98-5p	hsa-miR-29b-3p
COL6A3	0.0746093	0.438573	0.245455	2	hsa-miR-148a-3p	hsa-miR-29b-3p
COL9A3	0.0746093	0.438573	0.245455	2	hsa-let-7a-5p/hsa-let-7e-5p/hsa-let-7f-5p/hsa-let-7g-5p/hsa-miR-98-5p	hsa-miR-301a-3p
CTPS1	0.0746093	0.438573	0.245455	2	hsa-let-7a-5p/hsa-let-7e-5p/hsa-let-7f-5p/hsa-let-7g-5p/hsa-miR-98-5p	hsa-miR-29b-3p
CTSA	0.0746093	0.438573	0.245455	2	hsa-miR-142-5p	hsa-miR-148a-3p
DCBLD1	0.0746093	0.438573	0.245455	2	hsa-miR-133b	hsa-miR-26a-5p/hsa-miR-26b-5p
DENND5A	0.0746093	0.438573	0.245455	2	hsa-miR-103a-3p/hsa-miR-107	hsa-miR-23a-3p/hsa-miR-23b-3p
DHTKD1	0.0746093	0.438573	0.245455	2	hsa-miR-15b-5p/hsa-miR-15b-5p	hsa-miR-29b-3p
DSC2	0.0746093	0.438573	0.245455	2	hsa-miR-148a-3p	hsa-miR-29b-3p
ENPP2	0.0746093	0.438573	0.245455	2	hsa-miR-103a-3p/hsa-miR-107	hsa-miR-29b-3p
ESF1	0.0746093	0.438573	0.245455	2	hsa-miR-103a-3p/hsa-miR-107	hsa-miR-15b-5p/hsa-miR-15b-5p
FAM110C	0.0746093	0.438573	0.245455	2	hsa-miR-103a-3p/hsa-miR-107	hsa-miR-15b-5p/hsa-miR-15b-5p
FAM189B	0.0746093	0.438573	0.245455	2	hsa-miR-103a-3p/hsa-miR-107	hsa-miR-15b-5p/hsa-miR-15b-5p
FAM214B	0.0746093	0.438573	0.245455	2	hsa-let-7a-5p/hsa-let-7e-5p/hsa-let-7f-5p/hsa-let-7g-5p/hsa-miR-98-5p	hsa-miR-26a-5p/hsa-miR-26b-5p
FAM89A	0.0746093	0.438573	0.245455	2	hsa-miR-142-5p	hsa-miR-181c-5p
FTL	0.0746093	0.438573	0.245455	2	hsa-miR-133b	hsa-miR-22-3p
GALNT16	0.0746093	0.438573	0.245455	2	hsa-miR-133b	hsa-miR-181c-5p
GPALPP1	0.0746093	0.438573	0.245455	2	hsa-miR-143-3p	hsa-miR-26a-5p/hsa-miR-26b-5p
GPATCH2	0.0746093	0.438573	0.245455	2	hsa-let-7a-5p/hsa-let-7e-5p/hsa-let-7f-5p/hsa-let-7g-5p/hsa-miR-98-5p	hsa-miR-29b-3p
HIP1R	0.0746093	0.438573	0.245455	2	hsa-miR-132-3p/hsa-miR-212-3p	hsa-miR-199a-5p
HYOU1	0.0746093	0.438573	0.245455	2	hsa-miR-181c-5p	hsa-miR-27a-3p
IHH	0.0746093	0.438573	0.245455	2	hsa-miR-103a-3p/hsa-miR-107	hsa-miR-15b-5p/hsa-miR-15b-5p
IMPDH1	0.0746093	0.438573	0.245455	2	hsa-miR-29b-3p	hsa-miR-301a-3p
KCNE1	0.0746093	0.438573	0.245455	2	hsa-miR-193a-3p/hsa-miR-193b-3p	hsa-miR-22-3p
KIAA0195	0.0746093	0.438573	0.245455	2	hsa-miR-181c-5p	hsa-miR-433-3p
KREMEN2	0.0746093	0.438573	0.245455	2	hsa-miR-143-3p	hsa-miR-15b-5p/hsa-miR-15b-5p
LONRF2	0.0746093	0.438573	0.245455	2	hsa-miR-200a-3p	hsa-miR-27a-3p
LOXL2	0.0746093	0.438573	0.245455	2	hsa-miR-26a-5p/hsa-miR-26b-5p	hsa-miR-29b-3p
LRRC2	0.0746093	0.438573	0.245455	2	hsa-miR-133b	hsa-miR-26a-5p/hsa-miR-26b-5p
LYSMD1	0.0746093	0.438573	0.245455	2	hsa-miR-221-3p	hsa-miR-29b-3p
MAGOHB	0.0746093	0.438573	0.245455	2	hsa-miR-181c-5p	hsa-miR-23a-3p/hsa-miR-23b-3p
MAP9	0.0746093	0.438573	0.245455	2	hsa-miR-142-5p	hsa-miR-26a-5p/hsa-miR-26b-5p
MLF1	0.0746093	0.438573	0.245455	2	hsa-miR-181c-5p	hsa-miR-29b-3p
MNAT1	0.0746093	0.438573	0.245455	2	hsa-miR-200a-3p	hsa-miR-26a-5p/hsa-miR-26b-5p
MSANTD3	0.0746093	0.438573	0.245455	2	hsa-let-7a-5p/hsa-let-7e-5p/hsa-let-7f-5p/hsa-let-7g-5p/hsa-miR-98-5p	hsa-miR-342-3p
MYBL2	0.0746093	0.438573	0.245455	2	hsa-miR-143-3p	hsa-miR-29b-3p
NAA10	0.0746093	0.438573	0.245455	2	hsa-miR-22-3p	hsa-miR-29b-3p
NAA60	0.0746093	0.438573	0.245455	2	hsa-miR-200a-3p	hsa-miR-29b-3p
NGLY1	0.0746093	0.438573	0.245455	2	hsa-miR-148a-3p	hsa-miR-27a-3p
NISCH	0.0746093	0.438573	0.245455	2	hsa-miR-15b-5p/hsa-miR-15b-5p	hsa-miR-23a-3p/hsa-miR-23b-3p
NRD1	0.0746093	0.438573	0.245455	2	hsa-miR-148a-3p	hsa-miR-301a-3p
ORAI2	0.0746093	0.438573	0.245455	2	hsa-miR-133b	hsa-miR-29b-3p
PARD6G	0.0746093	0.438573	0.245455	2	hsa-miR-133b	hsa-miR-23a-3p/hsa-miR-23b-3p
PCYT2	0.0746093	0.438573	0.245455	2	hsa-miR-148a-3p	hsa-miR-301a-3p
PDGFB	0.0746093	0.438573	0.245455	2	hsa-let-7a-5p/hsa-let-7e-5p/hsa-let-7f-5p/hsa-let-7g-5p/hsa-miR-98-5p	hsa-miR-29b-3p
PDSS1	0.0746093	0.438573	0.245455	2	hsa-let-7a-5p/hsa-let-7e-5p/hsa-let-7f-5p/hsa-let-7g-5p/hsa-miR-98-5p	hsa-miR-22-3p
PKP2	0.0746093	0.438573	0.245455	2	hsa-miR-181c-5p	hsa-miR-23a-3p/hsa-miR-23b-3p
PLCG2	0.0746093	0.438573	0.245455	2	hsa-miR-23a-3p/hsa-miR-23b-3p	hsa-miR-29b-3p
PMP22	0.0746093	0.438573	0.245455	2	hsa-miR-199a-5p	hsa-miR-29b-3p
PPM1B	0.0746093	0.438573	0.245455	2	hsa-miR-199a-5p	hsa-miR-338-3p
PRPH2	0.0746093	0.438573	0.245455	2	hsa-miR-15b-5p/hsa-miR-15b-5p	hsa-miR-29b-3p
PTGR2	0.0746093	0.438573	0.245455	2	hsa-miR-181c-5p	hsa-miR-23a-3p/hsa-miR-23b-3p
PTRF	0.0746093	0.438573	0.245455	2	hsa-miR-29b-3p	hsa-miR-342-3p
QDPR	0.0746093	0.438573	0.245455	2	hsa-miR-143-3p	hsa-miR-181c-5p
RAB40C	0.0746093	0.438573	0.245455	2	hsa-let-7a-5p/hsa-let-7e-5p/hsa-let-7f-5p/hsa-let-7g-5p/hsa-miR-98-5p	hsa-miR-29b-3p
RASSF1	0.0746093	0.438573	0.245455	2	hsa-miR-181c-5p	hsa-miR-342-3p
RASSF6	0.0746093	0.438573	0.245455	2	hsa-miR-143-3p	hsa-miR-181c-5p
RFWD3	0.0746093	0.438573	0.245455	2	hsa-miR-103a-3p/hsa-miR-107	hsa-miR-15b-5p/hsa-miR-15b-5p
RGAG1	0.0746093	0.438573	0.245455	2	hsa-let-7a-5p/hsa-let-7e-5p/hsa-let-7f-5p/hsa-let-7g-5p/hsa-miR-98-5p	hsa-miR-200a-3p
RGS14	0.0746093	0.438573	0.245455	2	hsa-miR-154-3p	hsa-miR-22-3p
RNFT1	0.0746093	0.438573	0.245455	2	hsa-let-7a-5p/hsa-let-7e-5p/hsa-let-7f-5p/hsa-let-7g-5p/hsa-miR-98-5p	hsa-miR-200a-3p
RP5-1052I5.2	0.0746093	0.438573	0.245455	2	hsa-miR-200a-3p	hsa-miR-23a-3p/hsa-miR-23b-3p
SACM1L	0.0746093	0.438573	0.245455	2	hsa-miR-133b	hsa-miR-181c-5p
SCARA3	0.0746093	0.438573	0.245455	2	hsa-let-7a-5p/hsa-let-7e-5p/hsa-let-7f-5p/hsa-let-7g-5p/hsa-miR-98-5p	hsa-miR-301a-3p
SCN7A	0.0746093	0.438573	0.245455	2	hsa-miR-200a-3p	hsa-miR-29b-3p
SFRP4	0.0746093	0.438573	0.245455	2	hsa-miR-181c-5p	hsa-miR-23a-3p/hsa-miR-23b-3p
SIX2	0.0746093	0.438573	0.245455	2	hsa-miR-181c-5p	hsa-miR-23a-3p/hsa-miR-23b-3p
SLC25A46	0.0746093	0.438573	0.245455	2	hsa-miR-301a-3p	hsa-miR-433-3p
SLU7	0.0746093	0.438573	0.245455	2	hsa-miR-143-3p	hsa-miR-433-3p
SORBS2	0.0746093	0.438573	0.245455	2	hsa-miR-200a-3p	hsa-miR-433-3p
SREBF1	0.0746093	0.438573	0.245455	2	hsa-miR-132-3p/hsa-miR-212-3p	hsa-miR-142-5p
SRRM2	0.0746093	0.438573	0.245455	2	hsa-miR-27a-3p	hsa-miR-532-5p
STK10	0.0746093	0.438573	0.245455	2	hsa-miR-181c-5p	hsa-miR-27a-3p
STK33	0.0746093	0.438573	0.245455	2	hsa-miR-15b-5p/hsa-miR-15b-5p	hsa-miR-301a-3p
SVIL	0.0746093	0.438573	0.245455	2	hsa-miR-143-3p	hsa-miR-29b-3p
TBP	0.0746093	0.438573	0.245455	2	hsa-miR-15b-5p/hsa-miR-15b-5p	hsa-miR-27a-3p
TK2	0.0746093	0.438573	0.245455	2	hsa-miR-133b	hsa-miR-23a-3p/hsa-miR-23b-3p
TMSB10	0.0746093	0.438573	0.245455	2	hsa-miR-148a-3p	hsa-miR-27a-3p
TRIM63	0.0746093	0.438573	0.245455	2	hsa-miR-23a-3p/hsa-miR-23b-3p	hsa-miR-29b-3p
TRMT2A	0.0746093	0.438573	0.245455	2	hsa-miR-27a-3p	hsa-miR-342-3p
TRPM6	0.0746093	0.438573	0.245455	2	hsa-let-7a-5p/hsa-let-7e-5p/hsa-let-7f-5p/hsa-let-7g-5p/hsa-miR-98-5p	hsa-miR-26a-5p/hsa-miR-26b-5p
UBE3B	0.0746093	0.438573	0.245455	2	hsa-miR-148a-3p	hsa-miR-301a-3p
ULK3	0.0746093	0.438573	0.245455	2	hsa-miR-148a-3p	hsa-miR-199a-5p
UNC5A	0.0746093	0.438573	0.245455	2	hsa-let-7a-5p/hsa-let-7e-5p/hsa-let-7f-5p/hsa-let-7g-5p/hsa-miR-98-5p	hsa-miR-181c-5p
VSIG8	0.0746093	0.438573	0.245455	2	hsa-miR-200a-3p	hsa-miR-342-3p
ZBTB9	0.0746093	0.438573	0.245455	2	hsa-miR-15b-5p/hsa-miR-15b-5p	hsa-miR-23a-3p/hsa-miR-23b-3p
ZNF471	0.0746093	0.438573	0.245455	2	hsa-miR-181c-5p	hsa-miR-23a-3p/hsa-miR-23b-3p
ZNF655	0.0746093	0.438573	0.245455	2	hsa-miR-181c-5p	hsa-miR-23a-3p/hsa-miR-23b-3p
ZPLD1	0.0746093	0.438573	0.245455	2	hsa-let-7a-5p/hsa-let-7e-5p/hsa-let-7f-5p/hsa-let-7g-5p/hsa-miR-98-5p	hsa-miR-301a-3p
ZSCAN12	0.0746093	0.438573	0.245455	2	hsa-miR-181c-5p	hsa-miR-338-3p
AL590483.1	0.0760848	0.438573	0.429545	4	hsa-miR-181c-5p	hsa-miR-193a-3p/hsa-miR-193b-3p	hsa-miR-199a-5p	hsa-miR-26a-5p/hsa-miR-26b-5p
ANK1	0.0760848	0.438573	0.429545	4	hsa-miR-103a-3p/hsa-miR-107	hsa-miR-181c-5p	hsa-miR-27a-3p	hsa-miR-29b-3p
BLCAP	0.0760848	0.438573	0.429545	4	hsa-miR-142-5p	hsa-miR-199a-5p	hsa-miR-23a-3p/hsa-miR-23b-3p	hsa-miR-301a-3p
BMP3	0.0760848	0.438573	0.429545	4	hsa-miR-148a-3p	hsa-miR-181c-5p	hsa-miR-27a-3p	hsa-miR-301a-3p
CDV3	0.0760848	0.438573	0.429545	4	hsa-let-7a-5p/hsa-let-7e-5p/hsa-let-7f-5p/hsa-let-7g-5p/hsa-miR-98-5p	hsa-miR-103a-3p/hsa-miR-107	hsa-miR-15b-5p/hsa-miR-15b-5p	hsa-miR-200a-3p
CEP97	0.0760848	0.438573	0.429545	4	hsa-miR-142-5p	hsa-miR-181c-5p	hsa-miR-29b-3p	hsa-miR-433-3p
COL5A1	0.0760848	0.438573	0.429545	4	hsa-miR-181c-5p	hsa-miR-26a-5p/hsa-miR-26b-5p	hsa-miR-27a-3p	hsa-miR-29b-3p
COLEC10	0.0760848	0.438573	0.429545	4	hsa-miR-132-3p/hsa-miR-212-3p	hsa-miR-143-3p	hsa-miR-23a-3p/hsa-miR-23b-3p	hsa-miR-338-3p
COLQ	0.0760848	0.438573	0.429545	4	hsa-miR-132-3p/hsa-miR-212-3p	hsa-miR-181c-5p	hsa-miR-23a-3p/hsa-miR-23b-3p	hsa-miR-27a-3p
CTNNBIP1	0.0760848	0.438573	0.429545	4	hsa-miR-15b-5p/hsa-miR-15b-5p	hsa-miR-23a-3p/hsa-miR-23b-3p	hsa-miR-26a-5p/hsa-miR-26b-5p	hsa-miR-29b-3p
DGKE	0.0760848	0.438573	0.429545	4	hsa-miR-22-3p	hsa-miR-23a-3p/hsa-miR-23b-3p	hsa-miR-27a-3p	hsa-miR-301a-3p
DUSP5	0.0760848	0.438573	0.429545	4	hsa-miR-181c-5p	hsa-miR-23a-3p/hsa-miR-23b-3p	hsa-miR-26a-5p/hsa-miR-26b-5p	hsa-miR-27a-3p
EED	0.0760848	0.438573	0.429545	4	hsa-miR-15b-5p/hsa-miR-15b-5p	hsa-miR-181c-5p	hsa-miR-193a-3p/hsa-miR-193b-3p	hsa-miR-29b-3p
ENPEP	0.0760848	0.438573	0.429545	4	hsa-miR-132-3p/hsa-miR-212-3p	hsa-miR-133b	hsa-miR-26a-5p/hsa-miR-26b-5p	hsa-miR-27a-3p
EP300	0.0760848	0.438573	0.429545	4	hsa-miR-132-3p/hsa-miR-212-3p	hsa-miR-22-3p	hsa-miR-26a-5p/hsa-miR-26b-5p	hsa-miR-342-3p
FAM84B	0.0760848	0.438573	0.429545	4	hsa-let-7a-5p/hsa-let-7e-5p/hsa-let-7f-5p/hsa-let-7g-5p/hsa-miR-98-5p	hsa-miR-200a-3p	hsa-miR-27a-3p	hsa-miR-29b-3p
FGF1	0.0760848	0.438573	0.429545	4	hsa-miR-133b	hsa-miR-143-3p	hsa-miR-15b-5p/hsa-miR-15b-5p	hsa-miR-27a-3p
FSTL1	0.0760848	0.438573	0.429545	4	hsa-miR-15b-5p/hsa-miR-15b-5p	hsa-miR-181c-5p	hsa-miR-22-3p	hsa-miR-29b-3p
GGA2	0.0760848	0.438573	0.429545	4	hsa-miR-143-3p	hsa-miR-148a-3p	hsa-miR-221-3p	hsa-miR-301a-3p
GOPC	0.0760848	0.438573	0.429545	4	hsa-let-7a-5p/hsa-let-7e-5p/hsa-let-7f-5p/hsa-let-7g-5p/hsa-miR-98-5p	hsa-miR-103a-3p/hsa-miR-107	hsa-miR-142-5p	hsa-miR-29b-3p
HOXA5	0.0760848	0.438573	0.429545	4	hsa-miR-26a-5p/hsa-miR-26b-5p	hsa-miR-27a-3p	hsa-miR-301a-3p	hsa-miR-433-3p
IL6R	0.0760848	0.438573	0.429545	4	hsa-let-7a-5p/hsa-let-7e-5p/hsa-let-7f-5p/hsa-let-7g-5p/hsa-miR-98-5p	hsa-miR-143-3p	hsa-miR-22-3p	hsa-miR-23a-3p/hsa-miR-23b-3p
IRS2	0.0760848	0.438573	0.429545	4	hsa-let-7a-5p/hsa-let-7e-5p/hsa-let-7f-5p/hsa-let-7g-5p/hsa-miR-98-5p	hsa-miR-181c-5p	hsa-miR-200a-3p	hsa-miR-532-5p
KIAA1644	0.0760848	0.438573	0.429545	4	hsa-miR-142-5p	hsa-miR-181c-5p	hsa-miR-27a-3p	hsa-miR-29b-3p
MANEAL	0.0760848	0.438573	0.429545	4	hsa-miR-199a-5p	hsa-miR-22-3p	hsa-miR-27a-3p	hsa-miR-29b-3p
MINK1	0.0760848	0.438573	0.429545	4	hsa-miR-15b-5p/hsa-miR-15b-5p	hsa-miR-181c-5p	hsa-miR-199a-5p	hsa-miR-342-3p
MOB3B	0.0760848	0.438573	0.429545	4	hsa-miR-15b-5p/hsa-miR-15b-5p	hsa-miR-181c-5p	hsa-miR-200a-3p	hsa-miR-301a-3p
MYCBP2	0.0760848	0.438573	0.429545	4	hsa-miR-132-3p/hsa-miR-212-3p	hsa-miR-181c-5p	hsa-miR-27a-3p	hsa-miR-338-3p
POU3F1	0.0760848	0.438573	0.429545	4	hsa-miR-142-5p	hsa-miR-199a-5p	hsa-miR-342-3p	hsa-miR-502-3p
PPM1H	0.0760848	0.438573	0.429545	4	hsa-miR-133b	hsa-miR-15b-5p/hsa-miR-15b-5p	hsa-miR-26a-5p/hsa-miR-26b-5p	hsa-miR-27a-3p
PPP6R3	0.0760848	0.438573	0.429545	4	hsa-miR-133b	hsa-miR-15b-5p/hsa-miR-15b-5p	hsa-miR-27a-3p	hsa-miR-301a-3p
PRDM1	0.0760848	0.438573	0.429545	4	hsa-let-7a-5p/hsa-let-7e-5p/hsa-let-7f-5p/hsa-let-7g-5p/hsa-miR-98-5p	hsa-miR-133b	hsa-miR-181c-5p	hsa-miR-23a-3p/hsa-miR-23b-3p
RASSF5	0.0760848	0.438573	0.429545	4	hsa-miR-103a-3p/hsa-miR-107	hsa-miR-15b-5p/hsa-miR-15b-5p	hsa-miR-27a-3p	hsa-miR-532-5p
RP11-644F5.10	0.0760848	0.438573	0.429545	4	hsa-miR-181c-5p	hsa-miR-23a-3p/hsa-miR-23b-3p	hsa-miR-342-3p	hsa-miR-433-3p
SGK1	0.0760848	0.438573	0.429545	4	hsa-miR-133b	hsa-miR-15b-5p/hsa-miR-15b-5p	hsa-miR-23a-3p/hsa-miR-23b-3p	hsa-miR-29b-3p
SKIDA1	0.0760848	0.438573	0.429545	4	hsa-let-7a-5p/hsa-let-7e-5p/hsa-let-7f-5p/hsa-let-7g-5p/hsa-miR-98-5p	hsa-miR-148a-3p	hsa-miR-301a-3p	hsa-miR-338-3p
SLC8A2	0.0760848	0.438573	0.429545	4	hsa-let-7a-5p/hsa-let-7e-5p/hsa-let-7f-5p/hsa-let-7g-5p/hsa-miR-98-5p	hsa-miR-103a-3p/hsa-miR-107	hsa-miR-133b	hsa-miR-502-3p
STARD13	0.0760848	0.438573	0.429545	4	hsa-let-7a-5p/hsa-let-7e-5p/hsa-let-7f-5p/hsa-let-7g-5p/hsa-miR-98-5p	hsa-miR-133b	hsa-miR-148a-3p	hsa-miR-301a-3p
STAT3	0.0760848	0.438573	0.429545	4	hsa-let-7a-5p/hsa-let-7e-5p/hsa-let-7f-5p/hsa-let-7g-5p/hsa-miR-98-5p	hsa-miR-181c-5p	hsa-miR-29b-3p	hsa-miR-301a-3p
STON2	0.0760848	0.438573	0.429545	4	hsa-miR-142-5p	hsa-miR-199a-5p	hsa-miR-23a-3p/hsa-miR-23b-3p	hsa-miR-301a-3p
TAF4	0.0760848	0.438573	0.429545	4	hsa-miR-132-3p/hsa-miR-212-3p	hsa-miR-148a-3p	hsa-miR-181c-5p	hsa-miR-301a-3p
TMOD3	0.0760848	0.438573	0.429545	4	hsa-miR-133b	hsa-miR-22-3p	hsa-miR-29b-3p	hsa-miR-301a-3p
TYRO3	0.0760848	0.438573	0.429545	4	hsa-miR-133b	hsa-miR-15b-5p/hsa-miR-15b-5p	hsa-miR-22-3p	hsa-miR-338-3p
VASH1	0.0760848	0.438573	0.429545	4	hsa-miR-143-3p	hsa-miR-221-3p	hsa-miR-22-3p	hsa-miR-29b-3p
WDR47	0.0760848	0.438573	0.429545	4	hsa-miR-148a-3p	hsa-miR-15b-5p/hsa-miR-15b-5p	hsa-miR-221-3p	hsa-miR-301a-3p
ZNF512B	0.0760848	0.438573	0.429545	4	hsa-let-7a-5p/hsa-let-7e-5p/hsa-let-7f-5p/hsa-let-7g-5p/hsa-miR-98-5p	hsa-miR-142-5p	hsa-miR-199a-5p	hsa-miR-29b-3p
ZNF740	0.0760848	0.438573	0.429545	4	hsa-let-7a-5p/hsa-let-7e-5p/hsa-let-7f-5p/hsa-let-7g-5p/hsa-miR-98-5p	hsa-miR-133b	hsa-miR-199a-5p	hsa-miR-22-3p
ACVR2B	0.0770348	0.438573	0.669421	11	hsa-let-7a-5p/hsa-let-7e-5p/hsa-let-7f-5p/hsa-let-7g-5p/hsa-miR-98-5p	hsa-miR-103a-3p/hsa-miR-107	hsa-miR-132-3p/hsa-miR-212-3p	hsa-miR-148a-3p	hsa-miR-15b-5p/hsa-miR-15b-5p	hsa-miR-181c-5p	hsa-miR-199a-5p	hsa-miR-22-3p	hsa-miR-23a-3p/hsa-miR-23b-3p	hsa-miR-26a-5p/hsa-miR-26b-5p	hsa-miR-27a-3p
RSF1	0.0771622	0.438573	0.598295	8	hsa-let-7a-5p/hsa-let-7e-5p/hsa-let-7f-5p/hsa-let-7g-5p/hsa-miR-98-5p	hsa-miR-142-5p	hsa-miR-143-3p	hsa-miR-15b-5p/hsa-miR-15b-5p	hsa-miR-181c-5p	hsa-miR-193a-3p/hsa-miR-193b-3p	hsa-miR-199a-5p	hsa-miR-27a-3p
USP15	0.0771622	0.438573	0.598295	8	hsa-miR-132-3p/hsa-miR-212-3p	hsa-miR-142-5p	hsa-miR-15b-5p/hsa-miR-15b-5p	hsa-miR-181c-5p	hsa-miR-26a-5p/hsa-miR-26b-5p	hsa-miR-29b-3p	hsa-miR-338-3p	hsa-miR-433-3p
HGF	0.077498	0.438573	0.531818	6	hsa-miR-142-5p	hsa-miR-181c-5p	hsa-miR-199a-5p	hsa-miR-200a-3p	hsa-miR-26a-5p/hsa-miR-26b-5p	hsa-miR-27a-3p
HRK	0.077498	0.438573	0.531818	6	hsa-miR-142-5p	hsa-miR-143-3p	hsa-miR-191-5p	hsa-miR-27a-3p	hsa-miR-29b-3p	hsa-miR-301a-3p
LIN7C	0.077498	0.438573	0.531818	6	hsa-miR-133b	hsa-miR-181c-5p	hsa-miR-199a-5p	hsa-miR-22-3p	hsa-miR-27a-3p	hsa-miR-502-3p
PAQR3	0.077498	0.438573	0.531818	6	hsa-miR-143-3p	hsa-miR-154-3p	hsa-miR-15b-5p/hsa-miR-15b-5p	hsa-miR-181c-5p	hsa-miR-27a-3p	hsa-miR-29b-3p
RIMS3	0.077498	0.438573	0.531818	6	hsa-let-7a-5p/hsa-let-7e-5p/hsa-let-7f-5p/hsa-let-7g-5p/hsa-miR-98-5p	hsa-miR-103a-3p/hsa-miR-107	hsa-miR-143-3p	hsa-miR-15b-5p/hsa-miR-15b-5p	hsa-miR-221-3p	hsa-miR-27a-3p
RP11-766F14.2	0.077498	0.438573	0.531818	6	hsa-let-7a-5p/hsa-let-7e-5p/hsa-let-7f-5p/hsa-let-7g-5p/hsa-miR-98-5p	hsa-miR-221-3p	hsa-miR-23a-3p/hsa-miR-23b-3p	hsa-miR-26a-5p/hsa-miR-26b-5p	hsa-miR-29b-3p	hsa-miR-502-3p
SLITRK3	0.077498	0.438573	0.531818	6	hsa-miR-103a-3p/hsa-miR-107	hsa-miR-148a-3p	hsa-miR-181c-5p	hsa-miR-27a-3p	hsa-miR-29b-3p	hsa-miR-502-3p
ANKFY1	0.07884	0.438573	0.627273	9	hsa-let-7a-5p/hsa-let-7e-5p/hsa-let-7f-5p/hsa-let-7g-5p/hsa-miR-98-5p	hsa-miR-103a-3p/hsa-miR-107	hsa-miR-181c-5p	hsa-miR-193a-3p/hsa-miR-193b-3p	hsa-miR-200a-3p	hsa-miR-23a-3p/hsa-miR-23b-3p	hsa-miR-27a-3p	hsa-miR-29b-3p	hsa-miR-301a-3p
DNMT3A	0.07884	0.438573	0.627273	9	hsa-miR-132-3p/hsa-miR-212-3p	hsa-miR-143-3p	hsa-miR-154-3p	hsa-miR-22-3p	hsa-miR-23a-3p/hsa-miR-23b-3p	hsa-miR-26a-5p/hsa-miR-26b-5p	hsa-miR-29b-3p	hsa-miR-338-3p	hsa-miR-532-5p
FAM126B	0.07884	0.438573	0.627273	9	hsa-miR-103a-3p/hsa-miR-107	hsa-miR-181c-5p	hsa-miR-199a-5p	hsa-miR-200a-3p	hsa-miR-23a-3p/hsa-miR-23b-3p	hsa-miR-27a-3p	hsa-miR-29b-3p	hsa-miR-342-3p	hsa-miR-502-3p
ZFHX4	0.07884	0.438573	0.627273	9	hsa-miR-132-3p/hsa-miR-212-3p	hsa-miR-142-5p	hsa-miR-15b-5p/hsa-miR-15b-5p	hsa-miR-181c-5p	hsa-miR-23a-3p/hsa-miR-23b-3p	hsa-miR-26a-5p/hsa-miR-26b-5p	hsa-miR-27a-3p	hsa-miR-338-3p	hsa-miR-502-3p
AGPAT3	0.0794376	0.438573	0.490909	5	hsa-miR-103a-3p/hsa-miR-107	hsa-miR-15b-5p/hsa-miR-15b-5p	hsa-miR-26a-5p/hsa-miR-26b-5p	hsa-miR-27a-3p	hsa-miR-301a-3p
ATP2A2	0.0794376	0.438573	0.490909	5	hsa-let-7a-5p/hsa-let-7e-5p/hsa-let-7f-5p/hsa-let-7g-5p/hsa-miR-98-5p	hsa-miR-133b	hsa-miR-148a-3p	hsa-miR-181c-5p	hsa-miR-200a-3p
BNIP2	0.0794376	0.438573	0.490909	5	hsa-miR-132-3p/hsa-miR-212-3p	hsa-miR-142-5p	hsa-miR-148a-3p	hsa-miR-23a-3p/hsa-miR-23b-3p	hsa-miR-338-3p
C16orf87	0.0794376	0.438573	0.490909	5	hsa-miR-132-3p/hsa-miR-212-3p	hsa-miR-181c-5p	hsa-miR-200a-3p	hsa-miR-29b-3p	hsa-miR-338-3p
CBFB	0.0794376	0.438573	0.490909	5	hsa-miR-143-3p	hsa-miR-221-3p	hsa-miR-27a-3p	hsa-miR-301a-3p	hsa-miR-338-3p
CHST11	0.0794376	0.438573	0.490909	5	hsa-miR-103a-3p/hsa-miR-107	hsa-miR-132-3p/hsa-miR-212-3p	hsa-miR-23a-3p/hsa-miR-23b-3p	hsa-miR-301a-3p	hsa-miR-433-3p
DENND6A	0.0794376	0.438573	0.490909	5	hsa-let-7a-5p/hsa-let-7e-5p/hsa-let-7f-5p/hsa-let-7g-5p/hsa-miR-98-5p	hsa-miR-15b-5p/hsa-miR-15b-5p	hsa-miR-199a-5p	hsa-miR-29b-3p	hsa-miR-532-5p
ENTPD7	0.0794376	0.438573	0.490909	5	hsa-let-7a-5p/hsa-let-7e-5p/hsa-let-7f-5p/hsa-let-7g-5p/hsa-miR-98-5p	hsa-miR-103a-3p/hsa-miR-107	hsa-miR-133b	hsa-miR-15b-5p/hsa-miR-15b-5p	hsa-miR-29b-3p
GAPVD1	0.0794376	0.438573	0.490909	5	hsa-miR-132-3p/hsa-miR-212-3p	hsa-miR-148a-3p	hsa-miR-181c-5p	hsa-miR-23a-3p/hsa-miR-23b-3p	hsa-miR-301a-3p
HECTD1	0.0794376	0.438573	0.490909	5	hsa-miR-132-3p/hsa-miR-212-3p	hsa-miR-143-3p	hsa-miR-15b-5p/hsa-miR-15b-5p	hsa-miR-200a-3p	hsa-miR-301a-3p
KLF6	0.0794376	0.438573	0.490909	5	hsa-miR-148a-3p	hsa-miR-181c-5p	hsa-miR-200a-3p	hsa-miR-22-3p	hsa-miR-301a-3p
MTX3	0.0794376	0.438573	0.490909	5	hsa-miR-133b	hsa-miR-142-5p	hsa-miR-181c-5p	hsa-miR-29b-3p	hsa-miR-433-3p
NCOA3	0.0794376	0.438573	0.490909	5	hsa-miR-142-5p	hsa-miR-200a-3p	hsa-miR-27a-3p	hsa-miR-29b-3p	hsa-miR-301a-3p
SALL4	0.0794376	0.438573	0.490909	5	hsa-let-7a-5p/hsa-let-7e-5p/hsa-let-7f-5p/hsa-let-7g-5p/hsa-miR-98-5p	hsa-miR-103a-3p/hsa-miR-107	hsa-miR-15b-5p/hsa-miR-15b-5p	hsa-miR-181c-5p	hsa-miR-27a-3p
SLC30A1	0.0794376	0.438573	0.490909	5	hsa-let-7a-5p/hsa-let-7e-5p/hsa-let-7f-5p/hsa-let-7g-5p/hsa-miR-98-5p	hsa-miR-143-3p	hsa-miR-181c-5p	hsa-miR-200a-3p	hsa-miR-23a-3p/hsa-miR-23b-3p
SOCS2	0.0794376	0.438573	0.490909	5	hsa-miR-132-3p/hsa-miR-212-3p	hsa-miR-133b	hsa-miR-181c-5p	hsa-miR-22-3p	hsa-miR-301a-3p
SPOPL	0.0794376	0.438573	0.490909	5	hsa-miR-133b	hsa-miR-193a-3p/hsa-miR-193b-3p	hsa-miR-200a-3p	hsa-miR-23a-3p/hsa-miR-23b-3p	hsa-miR-301a-3p
TET1	0.0794376	0.438573	0.490909	5	hsa-miR-143-3p	hsa-miR-200a-3p	hsa-miR-26a-5p/hsa-miR-26b-5p	hsa-miR-27a-3p	hsa-miR-29b-3p
UBR3	0.0794376	0.438573	0.490909	5	hsa-miR-103a-3p/hsa-miR-107	hsa-miR-142-5p	hsa-miR-15b-5p/hsa-miR-15b-5p	hsa-miR-23a-3p/hsa-miR-23b-3p	hsa-miR-26a-5p/hsa-miR-26b-5p
VGLL4	0.0794376	0.438573	0.490909	5	hsa-miR-142-5p	hsa-miR-181c-5p	hsa-miR-221-3p	hsa-miR-26a-5p/hsa-miR-26b-5p	hsa-miR-301a-3p
WDFY3	0.0794376	0.438573	0.490909	5	hsa-miR-181c-5p	hsa-miR-200a-3p	hsa-miR-22-3p	hsa-miR-29b-3p	hsa-miR-301a-3p
KLF7	0.0827035	0.438573	0.695455	12	hsa-miR-103a-3p/hsa-miR-107	hsa-miR-132-3p/hsa-miR-212-3p	hsa-miR-133b	hsa-miR-15b-5p/hsa-miR-15b-5p	hsa-miR-181c-5p	hsa-miR-193a-3p/hsa-miR-193b-3p	hsa-miR-221-3p	hsa-miR-22-3p	hsa-miR-26a-5p/hsa-miR-26b-5p	hsa-miR-27a-3p	hsa-miR-301a-3p	hsa-miR-342-3p
AP2M1	0.0837901	0.438573	0.368182	3	hsa-miR-133b	hsa-miR-193a-3p/hsa-miR-193b-3p	hsa-miR-342-3p
ATG4D	0.0837901	0.438573	0.368182	3	hsa-miR-148a-3p	hsa-miR-199a-5p	hsa-miR-301a-3p
B3GNT5	0.0837901	0.438573	0.368182	3	hsa-miR-200a-3p	hsa-miR-23a-3p/hsa-miR-23b-3p	hsa-miR-29b-3p
BAG5	0.0837901	0.438573	0.368182	3	hsa-miR-15b-5p/hsa-miR-15b-5p	hsa-miR-22-3p	hsa-miR-301a-3p
BCAP29	0.0837901	0.438573	0.368182	3	hsa-let-7a-5p/hsa-let-7e-5p/hsa-let-7f-5p/hsa-let-7g-5p/hsa-miR-98-5p	hsa-miR-199a-5p	hsa-miR-200a-3p
BCR	0.0837901	0.438573	0.368182	3	hsa-miR-15b-5p/hsa-miR-15b-5p	hsa-miR-181c-5p	hsa-miR-26a-5p/hsa-miR-26b-5p
C4orf29	0.0837901	0.438573	0.368182	3	hsa-miR-200a-3p	hsa-miR-23a-3p/hsa-miR-23b-3p	hsa-miR-29b-3p
CACNA1B	0.0837901	0.438573	0.368182	3	hsa-miR-133b	hsa-miR-142-5p	hsa-miR-29b-3p
CCDC93	0.0837901	0.438573	0.368182	3	hsa-let-7a-5p/hsa-let-7e-5p/hsa-let-7f-5p/hsa-let-7g-5p/hsa-miR-98-5p	hsa-miR-143-3p	hsa-miR-433-3p
CCSAP	0.0837901	0.438573	0.368182	3	hsa-let-7a-5p/hsa-let-7e-5p/hsa-let-7f-5p/hsa-let-7g-5p/hsa-miR-98-5p	hsa-miR-23a-3p/hsa-miR-23b-3p	hsa-miR-29b-3p
CGNL1	0.0837901	0.438573	0.368182	3	hsa-let-7a-5p/hsa-let-7e-5p/hsa-let-7f-5p/hsa-let-7g-5p/hsa-miR-98-5p	hsa-miR-15b-5p/hsa-miR-15b-5p	hsa-miR-22-3p
COL9A1	0.0837901	0.438573	0.368182	3	hsa-let-7a-5p/hsa-let-7e-5p/hsa-let-7f-5p/hsa-let-7g-5p/hsa-miR-98-5p	hsa-miR-26a-5p/hsa-miR-26b-5p	hsa-miR-29b-3p
DEPDC1	0.0837901	0.438573	0.368182	3	hsa-miR-23a-3p/hsa-miR-23b-3p	hsa-miR-26a-5p/hsa-miR-26b-5p	hsa-miR-301a-3p
DEPTOR	0.0837901	0.438573	0.368182	3	hsa-miR-103a-3p/hsa-miR-107	hsa-miR-15b-5p/hsa-miR-15b-5p	hsa-miR-181c-5p
DUSP2	0.0837901	0.438573	0.368182	3	hsa-miR-142-5p	hsa-miR-29b-3p	hsa-miR-338-3p
EZH1	0.0837901	0.438573	0.368182	3	hsa-let-7a-5p/hsa-let-7e-5p/hsa-let-7f-5p/hsa-let-7g-5p/hsa-miR-98-5p	hsa-miR-15b-5p/hsa-miR-15b-5p	hsa-miR-22-3p
FAM135A	0.0837901	0.438573	0.368182	3	hsa-let-7a-5p/hsa-let-7e-5p/hsa-let-7f-5p/hsa-let-7g-5p/hsa-miR-98-5p	hsa-miR-15b-5p/hsa-miR-15b-5p	hsa-miR-181c-5p
FAM189A1	0.0837901	0.438573	0.368182	3	hsa-let-7a-5p/hsa-let-7e-5p/hsa-let-7f-5p/hsa-let-7g-5p/hsa-miR-98-5p	hsa-miR-142-5p	hsa-miR-15b-5p/hsa-miR-15b-5p
FOXJ2	0.0837901	0.438573	0.368182	3	hsa-miR-103a-3p/hsa-miR-107	hsa-miR-142-5p	hsa-miR-29b-3p
GRB2	0.0837901	0.438573	0.368182	3	hsa-miR-200a-3p	hsa-miR-27a-3p	hsa-miR-433-3p
GTF2H1	0.0837901	0.438573	0.368182	3	hsa-miR-132-3p/hsa-miR-212-3p	hsa-miR-148a-3p	hsa-miR-301a-3p
GTF2I	0.0837901	0.438573	0.368182	3	hsa-let-7a-5p/hsa-let-7e-5p/hsa-let-7f-5p/hsa-let-7g-5p/hsa-miR-98-5p	hsa-miR-27a-3p	hsa-miR-338-3p
H2AFY	0.0837901	0.438573	0.368182	3	hsa-miR-148a-3p	hsa-miR-29b-3p	hsa-miR-433-3p
HECA	0.0837901	0.438573	0.368182	3	hsa-miR-142-5p	hsa-miR-181c-5p	hsa-miR-301a-3p
HECTD4	0.0837901	0.438573	0.368182	3	hsa-let-7a-5p/hsa-let-7e-5p/hsa-let-7f-5p/hsa-let-7g-5p/hsa-miR-98-5p	hsa-miR-15b-5p/hsa-miR-15b-5p	hsa-miR-26a-5p/hsa-miR-26b-5p
HPSE2	0.0837901	0.438573	0.368182	3	hsa-miR-103a-3p/hsa-miR-107	hsa-miR-15b-5p/hsa-miR-15b-5p	hsa-miR-338-3p
IGF2BP3	0.0837901	0.438573	0.368182	3	hsa-let-7a-5p/hsa-let-7e-5p/hsa-let-7f-5p/hsa-let-7g-5p/hsa-miR-98-5p	hsa-miR-142-5p	hsa-miR-181c-5p
KCNJ12	0.0837901	0.438573	0.368182	3	hsa-miR-132-3p/hsa-miR-212-3p	hsa-miR-133b	hsa-miR-29b-3p
KCNQ4	0.0837901	0.438573	0.368182	3	hsa-let-7a-5p/hsa-let-7e-5p/hsa-let-7f-5p/hsa-let-7g-5p/hsa-miR-98-5p	hsa-miR-148a-3p	hsa-miR-26a-5p/hsa-miR-26b-5p
LDLR	0.0837901	0.438573	0.368182	3	hsa-miR-148a-3p	hsa-miR-27a-3p	hsa-miR-301a-3p
LEP	0.0837901	0.438573	0.368182	3	hsa-miR-27a-3p	hsa-miR-29b-3p	hsa-miR-532-5p
LPAR3	0.0837901	0.438573	0.368182	3	hsa-miR-193a-3p/hsa-miR-193b-3p	hsa-miR-200a-3p	hsa-miR-26a-5p/hsa-miR-26b-5p
LPIN2	0.0837901	0.438573	0.368182	3	hsa-miR-133b	hsa-miR-200a-3p	hsa-miR-27a-3p
MACC1	0.0837901	0.438573	0.368182	3	hsa-miR-15b-5p/hsa-miR-15b-5p	hsa-miR-338-3p	hsa-miR-433-3p
MEPCE	0.0837901	0.438573	0.368182	3	hsa-miR-132-3p/hsa-miR-212-3p	hsa-miR-23a-3p/hsa-miR-23b-3p	hsa-miR-27a-3p
METTL21B	0.0837901	0.438573	0.368182	3	hsa-miR-133b	hsa-miR-15b-5p/hsa-miR-15b-5p	hsa-miR-29b-3p
MINPP1	0.0837901	0.438573	0.368182	3	hsa-miR-199a-5p	hsa-miR-23a-3p/hsa-miR-23b-3p	hsa-miR-26a-5p/hsa-miR-26b-5p
NFAM1	0.0837901	0.438573	0.368182	3	hsa-miR-103a-3p/hsa-miR-107	hsa-miR-15b-5p/hsa-miR-15b-5p	hsa-miR-342-3p
NUP43	0.0837901	0.438573	0.368182	3	hsa-miR-148a-3p	hsa-miR-27a-3p	hsa-miR-433-3p
PAK1	0.0837901	0.438573	0.368182	3	hsa-let-7a-5p/hsa-let-7e-5p/hsa-let-7f-5p/hsa-let-7g-5p/hsa-miR-98-5p	hsa-miR-221-3p	hsa-miR-26a-5p/hsa-miR-26b-5p
PIK3IP1	0.0837901	0.438573	0.368182	3	hsa-let-7a-5p/hsa-let-7e-5p/hsa-let-7f-5p/hsa-let-7g-5p/hsa-miR-98-5p	hsa-miR-132-3p/hsa-miR-212-3p	hsa-miR-342-3p
PITPNB	0.0837901	0.438573	0.368182	3	hsa-miR-133b	hsa-miR-181c-5p	hsa-miR-200a-3p
PPM1K	0.0837901	0.438573	0.368182	3	hsa-miR-15b-5p/hsa-miR-15b-5p	hsa-miR-22-3p	hsa-miR-23a-3p/hsa-miR-23b-3p
RAB27B	0.0837901	0.438573	0.368182	3	hsa-miR-133b	hsa-miR-181c-5p	hsa-miR-199a-5p
RGPD4	0.0837901	0.438573	0.368182	3	hsa-miR-142-5p	hsa-miR-15b-5p/hsa-miR-15b-5p	hsa-miR-27a-3p
RGPD6	0.0837901	0.438573	0.368182	3	hsa-miR-142-5p	hsa-miR-15b-5p/hsa-miR-15b-5p	hsa-miR-27a-3p
RGS4	0.0837901	0.438573	0.368182	3	hsa-miR-103a-3p/hsa-miR-107	hsa-miR-26a-5p/hsa-miR-26b-5p	hsa-miR-342-3p
RIOK3	0.0837901	0.438573	0.368182	3	hsa-let-7a-5p/hsa-let-7e-5p/hsa-let-7f-5p/hsa-let-7g-5p/hsa-miR-98-5p	hsa-miR-27a-3p	hsa-miR-29b-3p
SACS	0.0837901	0.438573	0.368182	3	hsa-miR-142-5p	hsa-miR-199a-5p	hsa-miR-26a-5p/hsa-miR-26b-5p
SIDT2	0.0837901	0.438573	0.368182	3	hsa-miR-15b-5p/hsa-miR-15b-5p	hsa-miR-200a-3p	hsa-miR-29b-3p
SLC24A3	0.0837901	0.438573	0.368182	3	hsa-miR-15b-5p/hsa-miR-15b-5p	hsa-miR-199a-5p	hsa-miR-301a-3p
SLC35D1	0.0837901	0.438573	0.368182	3	hsa-miR-193a-3p/hsa-miR-193b-3p	hsa-miR-200a-3p	hsa-miR-301a-3p
SMG7	0.0837901	0.438573	0.368182	3	hsa-miR-181c-5p	hsa-miR-200a-3p	hsa-miR-22-3p
SMIM12	0.0837901	0.438573	0.368182	3	hsa-miR-148a-3p	hsa-miR-22-3p	hsa-miR-29b-3p
SPRYD7	0.0837901	0.438573	0.368182	3	hsa-miR-132-3p/hsa-miR-212-3p	hsa-miR-148a-3p	hsa-miR-199a-5p
STMN1	0.0837901	0.438573	0.368182	3	hsa-miR-193a-3p/hsa-miR-193b-3p	hsa-miR-221-3p	hsa-miR-26a-5p/hsa-miR-26b-5p
SULT4A1	0.0837901	0.438573	0.368182	3	hsa-miR-199a-5p	hsa-miR-27a-3p	hsa-miR-338-3p
TGFBRAP1	0.0837901	0.438573	0.368182	3	hsa-miR-148a-3p	hsa-miR-301a-3p	hsa-miR-338-3p
TSPYL4	0.0837901	0.438573	0.368182	3	hsa-miR-23a-3p/hsa-miR-23b-3p	hsa-miR-26a-5p/hsa-miR-26b-5p	hsa-miR-338-3p
TUBB6	0.0837901	0.438573	0.368182	3	hsa-miR-148a-3p	hsa-miR-22-3p	hsa-miR-338-3p
WHSC1	0.0837901	0.438573	0.368182	3	hsa-miR-148a-3p	hsa-miR-23a-3p/hsa-miR-23b-3p	hsa-miR-26a-5p/hsa-miR-26b-5p
YAP1	0.0837901	0.438573	0.368182	3	hsa-miR-15b-5p/hsa-miR-15b-5p	hsa-miR-200a-3p	hsa-miR-27a-3p
ZNF286B	0.0837901	0.438573	0.368182	3	hsa-miR-181c-5p	hsa-miR-199a-5p	hsa-miR-23a-3p/hsa-miR-23b-3p
FAXC	0.0845703	0.438573	0.578571	7	hsa-let-7a-5p/hsa-let-7e-5p/hsa-let-7f-5p/hsa-let-7g-5p/hsa-miR-98-5p	hsa-miR-143-3p	hsa-miR-181c-5p	hsa-miR-200a-3p	hsa-miR-26a-5p/hsa-miR-26b-5p	hsa-miR-29b-3p	hsa-miR-301a-3p
MAPK1IP1L	0.0845703	0.438573	0.578571	7	hsa-let-7a-5p/hsa-let-7e-5p/hsa-let-7f-5p/hsa-let-7g-5p/hsa-miR-98-5p	hsa-miR-103a-3p/hsa-miR-107	hsa-miR-15b-5p/hsa-miR-15b-5p	hsa-miR-181c-5p	hsa-miR-23a-3p/hsa-miR-23b-3p	hsa-miR-338-3p	hsa-miR-433-3p
STIM2	0.0845703	0.438573	0.578571	7	hsa-miR-132-3p/hsa-miR-212-3p	hsa-miR-154-3p	hsa-miR-181c-5p	hsa-miR-23a-3p/hsa-miR-23b-3p	hsa-miR-27a-3p	hsa-miR-301a-3p	hsa-miR-502-3p
TGFBR1	0.0845703	0.438573	0.578571	7	hsa-let-7a-5p/hsa-let-7e-5p/hsa-let-7f-5p/hsa-let-7g-5p/hsa-miR-98-5p	hsa-miR-133b	hsa-miR-181c-5p	hsa-miR-22-3p	hsa-miR-27a-3p	hsa-miR-301a-3p	hsa-miR-433-3p
ZC3H12C	0.0845703	0.438573	0.578571	7	hsa-miR-103a-3p/hsa-miR-107	hsa-miR-142-5p	hsa-miR-148a-3p	hsa-miR-23a-3p/hsa-miR-23b-3p	hsa-miR-301a-3p	hsa-miR-502-3p	hsa-miR-532-5p
BACH2	0.0880935	0.438573	0.613636	8	hsa-miR-103a-3p/hsa-miR-107	hsa-miR-148a-3p	hsa-miR-15b-5p/hsa-miR-15b-5p	hsa-miR-181c-5p	hsa-miR-200a-3p	hsa-miR-23a-3p/hsa-miR-23b-3p	hsa-miR-29b-3p	hsa-miR-301a-3p
HIC2	0.0880935	0.438573	0.613636	8	hsa-let-7a-5p/hsa-let-7e-5p/hsa-let-7f-5p/hsa-let-7g-5p/hsa-miR-98-5p	hsa-miR-103a-3p/hsa-miR-107	hsa-miR-132-3p/hsa-miR-212-3p	hsa-miR-133b	hsa-miR-181c-5p	hsa-miR-193a-3p/hsa-miR-193b-3p	hsa-miR-200a-3p	hsa-miR-27a-3p
KAT7	0.0880935	0.438573	0.613636	8	hsa-miR-103a-3p/hsa-miR-107	hsa-miR-132-3p/hsa-miR-212-3p	hsa-miR-143-3p	hsa-miR-148a-3p	hsa-miR-181c-5p	hsa-miR-22-3p	hsa-miR-301a-3p	hsa-miR-342-3p
PCDH17	0.0880935	0.438573	0.613636	8	hsa-miR-103a-3p/hsa-miR-107	hsa-miR-133b	hsa-miR-15b-5p/hsa-miR-15b-5p	hsa-miR-199a-5p	hsa-miR-23a-3p/hsa-miR-23b-3p	hsa-miR-29b-3p	hsa-miR-342-3p	hsa-miR-502-3p
RGS17	0.0880935	0.438573	0.613636	8	hsa-let-7a-5p/hsa-let-7e-5p/hsa-let-7f-5p/hsa-let-7g-5p/hsa-miR-98-5p	hsa-miR-103a-3p/hsa-miR-107	hsa-miR-142-5p	hsa-miR-199a-5p	hsa-miR-200a-3p	hsa-miR-221-3p	hsa-miR-26a-5p/hsa-miR-26b-5p	hsa-miR-27a-3p
SESN3	0.0882709	0.438573	0.662727	10	hsa-let-7a-5p/hsa-let-7e-5p/hsa-let-7f-5p/hsa-let-7g-5p/hsa-miR-98-5p	hsa-miR-132-3p/hsa-miR-212-3p	hsa-miR-133b	hsa-miR-148a-3p	hsa-miR-181c-5p	hsa-miR-221-3p	hsa-miR-23a-3p/hsa-miR-23b-3p	hsa-miR-26a-5p/hsa-miR-26b-5p	hsa-miR-27a-3p	hsa-miR-433-3p
SRSF10	0.0882709	0.438573	0.662727	10	hsa-miR-103a-3p/hsa-miR-107	hsa-miR-132-3p/hsa-miR-212-3p	hsa-miR-133b	hsa-miR-15b-5p/hsa-miR-15b-5p	hsa-miR-181c-5p	hsa-miR-200a-3p	hsa-miR-221-3p	hsa-miR-22-3p	hsa-miR-29b-3p	hsa-miR-301a-3p
ELAVL2	0.0891055	0.438573	0.640909	9	hsa-miR-142-5p	hsa-miR-148a-3p	hsa-miR-154-3p	hsa-miR-181c-5p	hsa-miR-200a-3p	hsa-miR-221-3p	hsa-miR-26a-5p/hsa-miR-26b-5p	hsa-miR-27a-3p	hsa-miR-502-3p
TEAD1	0.0891055	0.438573	0.640909	9	hsa-miR-132-3p/hsa-miR-212-3p	hsa-miR-133b	hsa-miR-148a-3p	hsa-miR-154-3p	hsa-miR-15b-5p/hsa-miR-15b-5p	hsa-miR-181c-5p	hsa-miR-23a-3p/hsa-miR-23b-3p	hsa-miR-27a-3p	hsa-miR-532-5p
C17orf85	0.0909975	0.438573	0.552273	6	hsa-let-7a-5p/hsa-let-7e-5p/hsa-let-7f-5p/hsa-let-7g-5p/hsa-miR-98-5p	hsa-miR-15b-5p/hsa-miR-15b-5p	hsa-miR-199a-5p	hsa-miR-22-3p	hsa-miR-23a-3p/hsa-miR-23b-3p	hsa-miR-27a-3p
C1orf21	0.0909975	0.438573	0.552273	6	hsa-miR-15b-5p/hsa-miR-15b-5p	hsa-miR-200a-3p	hsa-miR-22-3p	hsa-miR-27a-3p	hsa-miR-29b-3p	hsa-miR-338-3p
GPC6	0.0909975	0.438573	0.552273	6	hsa-miR-103a-3p/hsa-miR-107	hsa-miR-154-3p	hsa-miR-15b-5p/hsa-miR-15b-5p	hsa-miR-200a-3p	hsa-miR-23a-3p/hsa-miR-23b-3p	hsa-miR-301a-3p
KIAA1432	0.0909975	0.438573	0.552273	6	hsa-miR-133b	hsa-miR-15b-5p/hsa-miR-15b-5p	hsa-miR-23a-3p/hsa-miR-23b-3p	hsa-miR-29b-3p	hsa-miR-338-3p	hsa-miR-433-3p
LPGAT1	0.0909975	0.438573	0.552273	6	hsa-let-7a-5p/hsa-let-7e-5p/hsa-let-7f-5p/hsa-let-7g-5p/hsa-miR-98-5p	hsa-miR-133b	hsa-miR-181c-5p	hsa-miR-200a-3p	hsa-miR-23a-3p/hsa-miR-23b-3p	hsa-miR-29b-3p
PBX1	0.0909975	0.438573	0.552273	6	hsa-let-7a-5p/hsa-let-7e-5p/hsa-let-7f-5p/hsa-let-7g-5p/hsa-miR-98-5p	hsa-miR-142-5p	hsa-miR-181c-5p	hsa-miR-200a-3p	hsa-miR-23a-3p/hsa-miR-23b-3p	hsa-miR-338-3p
PHACTR4	0.0909975	0.438573	0.552273	6	hsa-miR-15b-5p/hsa-miR-15b-5p	hsa-miR-181c-5p	hsa-miR-199a-5p	hsa-miR-221-3p	hsa-miR-22-3p	hsa-miR-301a-3p
PRPF40A	0.0909975	0.438573	0.552273	6	hsa-miR-142-5p	hsa-miR-154-3p	hsa-miR-181c-5p	hsa-miR-199a-5p	hsa-miR-23a-3p/hsa-miR-23b-3p	hsa-miR-29b-3p
SEMA6D	0.0909975	0.438573	0.552273	6	hsa-miR-15b-5p/hsa-miR-15b-5p	hsa-miR-221-3p	hsa-miR-23a-3p/hsa-miR-23b-3p	hsa-miR-26a-5p/hsa-miR-26b-5p	hsa-miR-27a-3p	hsa-miR-338-3p
SLC22A23	0.0909975	0.438573	0.552273	6	hsa-let-7a-5p/hsa-let-7e-5p/hsa-let-7f-5p/hsa-let-7g-5p/hsa-miR-98-5p	hsa-miR-142-5p	hsa-miR-23a-3p/hsa-miR-23b-3p	hsa-miR-26a-5p/hsa-miR-26b-5p	hsa-miR-27a-3p	hsa-miR-338-3p
SLC24A4	0.0909975	0.438573	0.552273	6	hsa-miR-148a-3p	hsa-miR-199a-5p	hsa-miR-22-3p	hsa-miR-26a-5p/hsa-miR-26b-5p	hsa-miR-27a-3p	hsa-miR-29b-3p
SLC25A16	0.0909975	0.438573	0.552273	6	hsa-miR-142-5p	hsa-miR-154-3p	hsa-miR-23a-3p/hsa-miR-23b-3p	hsa-miR-26a-5p/hsa-miR-26b-5p	hsa-miR-27a-3p	hsa-miR-338-3p
TCF7L2	0.0909975	0.438573	0.552273	6	hsa-miR-132-3p/hsa-miR-212-3p	hsa-miR-181c-5p	hsa-miR-191-5p	hsa-miR-221-3p	hsa-miR-22-3p	hsa-miR-26a-5p/hsa-miR-26b-5p
ARF6	0.0949776	0.438573	0.460227	4	hsa-miR-181c-5p	hsa-miR-199a-5p	hsa-miR-26a-5p/hsa-miR-26b-5p	hsa-miR-27a-3p
ARID1B	0.0949776	0.438573	0.460227	4	hsa-miR-132-3p/hsa-miR-212-3p	hsa-miR-142-5p	hsa-miR-27a-3p	hsa-miR-29b-3p
CDC25A	0.0949776	0.438573	0.460227	4	hsa-let-7a-5p/hsa-let-7e-5p/hsa-let-7f-5p/hsa-let-7g-5p/hsa-miR-98-5p	hsa-miR-142-5p	hsa-miR-15b-5p/hsa-miR-15b-5p	hsa-miR-200a-3p
CKAP4	0.0949776	0.438573	0.460227	4	hsa-miR-133b	hsa-miR-181c-5p	hsa-miR-23a-3p/hsa-miR-23b-3p	hsa-miR-27a-3p
CLASP2	0.0949776	0.438573	0.460227	4	hsa-let-7a-5p/hsa-let-7e-5p/hsa-let-7f-5p/hsa-let-7g-5p/hsa-miR-98-5p	hsa-miR-143-3p	hsa-miR-200a-3p	hsa-miR-26a-5p/hsa-miR-26b-5p
CNOT1	0.0949776	0.438573	0.460227	4	hsa-miR-133b	hsa-miR-181c-5p	hsa-miR-22-3p	hsa-miR-27a-3p
CSRNP1	0.0949776	0.438573	0.460227	4	hsa-miR-133b	hsa-miR-15b-5p/hsa-miR-15b-5p	hsa-miR-193a-3p/hsa-miR-193b-3p	hsa-miR-27a-3p
CYB5R4	0.0949776	0.438573	0.460227	4	hsa-miR-132-3p/hsa-miR-212-3p	hsa-miR-148a-3p	hsa-miR-15b-5p/hsa-miR-15b-5p	hsa-miR-301a-3p
DIP2B	0.0949776	0.438573	0.460227	4	hsa-miR-143-3p	hsa-miR-181c-5p	hsa-miR-200a-3p	hsa-miR-29b-3p
ERO1L	0.0949776	0.438573	0.460227	4	hsa-let-7a-5p/hsa-let-7e-5p/hsa-let-7f-5p/hsa-let-7g-5p/hsa-miR-98-5p	hsa-miR-181c-5p	hsa-miR-23a-3p/hsa-miR-23b-3p	hsa-miR-532-5p
EYA1	0.0949776	0.438573	0.460227	4	hsa-miR-133b	hsa-miR-15b-5p/hsa-miR-15b-5p	hsa-miR-23a-3p/hsa-miR-23b-3p	hsa-miR-27a-3p
FAM131B	0.0949776	0.438573	0.460227	4	hsa-miR-142-5p	hsa-miR-193a-3p/hsa-miR-193b-3p	hsa-miR-29b-3p	hsa-miR-502-3p
FAM196B	0.0949776	0.438573	0.460227	4	hsa-miR-143-3p	hsa-miR-221-3p	hsa-miR-26a-5p/hsa-miR-26b-5p	hsa-miR-301a-3p
FOS	0.0949776	0.438573	0.460227	4	hsa-miR-142-5p	hsa-miR-181c-5p	hsa-miR-221-3p	hsa-miR-29b-3p
FSD1L	0.0949776	0.438573	0.460227	4	hsa-miR-181c-5p	hsa-miR-200a-3p	hsa-miR-301a-3p	hsa-miR-433-3p
GINM1	0.0949776	0.438573	0.460227	4	hsa-miR-142-5p	hsa-miR-199a-5p	hsa-miR-26a-5p/hsa-miR-26b-5p	hsa-miR-433-3p
GSKIP	0.0949776	0.438573	0.460227	4	hsa-miR-103a-3p/hsa-miR-107	hsa-miR-15b-5p/hsa-miR-15b-5p	hsa-miR-181c-5p	hsa-miR-200a-3p
HDLBP	0.0949776	0.438573	0.460227	4	hsa-let-7a-5p/hsa-let-7e-5p/hsa-let-7f-5p/hsa-let-7g-5p/hsa-miR-98-5p	hsa-miR-142-5p	hsa-miR-199a-5p	hsa-miR-433-3p
KHNYN	0.0949776	0.438573	0.460227	4	hsa-let-7a-5p/hsa-let-7e-5p/hsa-let-7f-5p/hsa-let-7g-5p/hsa-miR-98-5p	hsa-miR-15b-5p/hsa-miR-15b-5p	hsa-miR-193a-3p/hsa-miR-193b-3p	hsa-miR-22-3p
KIAA1429	0.0949776	0.438573	0.460227	4	hsa-miR-103a-3p/hsa-miR-107	hsa-miR-133b	hsa-miR-143-3p	hsa-miR-338-3p
KLHL42	0.0949776	0.438573	0.460227	4	hsa-miR-133b	hsa-miR-181c-5p	hsa-miR-26a-5p/hsa-miR-26b-5p	hsa-miR-29b-3p
LIMD2	0.0949776	0.438573	0.460227	4	hsa-let-7a-5p/hsa-let-7e-5p/hsa-let-7f-5p/hsa-let-7g-5p/hsa-miR-98-5p	hsa-miR-148a-3p	hsa-miR-199a-5p	hsa-miR-301a-3p
MECOM	0.0949776	0.438573	0.460227	4	hsa-miR-132-3p/hsa-miR-212-3p	hsa-miR-133b	hsa-miR-22-3p	hsa-miR-338-3p
MET	0.0949776	0.438573	0.460227	4	hsa-miR-148a-3p	hsa-miR-23a-3p/hsa-miR-23b-3p	hsa-miR-27a-3p	hsa-miR-301a-3p
MIER1	0.0949776	0.438573	0.460227	4	hsa-miR-148a-3p	hsa-miR-200a-3p	hsa-miR-301a-3p	hsa-miR-433-3p
NAT8L	0.0949776	0.438573	0.460227	4	hsa-let-7a-5p/hsa-let-7e-5p/hsa-let-7f-5p/hsa-let-7g-5p/hsa-miR-98-5p	hsa-miR-103a-3p/hsa-miR-107	hsa-miR-148a-3p	hsa-miR-15b-5p/hsa-miR-15b-5p
NIPA1	0.0949776	0.438573	0.460227	4	hsa-let-7a-5p/hsa-let-7e-5p/hsa-let-7f-5p/hsa-let-7g-5p/hsa-miR-98-5p	hsa-miR-133b	hsa-miR-26a-5p/hsa-miR-26b-5p	hsa-miR-301a-3p
NOTCH2	0.0949776	0.438573	0.460227	4	hsa-miR-103a-3p/hsa-miR-107	hsa-miR-15b-5p/hsa-miR-15b-5p	hsa-miR-181c-5p	hsa-miR-29b-3p
NRARP	0.0949776	0.438573	0.460227	4	hsa-miR-148a-3p	hsa-miR-15b-5p/hsa-miR-15b-5p	hsa-miR-27a-3p	hsa-miR-301a-3p
OTX2	0.0949776	0.438573	0.460227	4	hsa-miR-142-5p	hsa-miR-148a-3p	hsa-miR-27a-3p	hsa-miR-301a-3p
PIGA	0.0949776	0.438573	0.460227	4	hsa-let-7a-5p/hsa-let-7e-5p/hsa-let-7f-5p/hsa-let-7g-5p/hsa-miR-98-5p	hsa-miR-148a-3p	hsa-miR-27a-3p	hsa-miR-301a-3p
PRKAR2A	0.0949776	0.438573	0.460227	4	hsa-let-7a-5p/hsa-let-7e-5p/hsa-let-7f-5p/hsa-let-7g-5p/hsa-miR-98-5p	hsa-miR-15b-5p/hsa-miR-15b-5p	hsa-miR-181c-5p	hsa-miR-22-3p
RAI14	0.0949776	0.438573	0.460227	4	hsa-miR-103a-3p/hsa-miR-107	hsa-miR-148a-3p	hsa-miR-23a-3p/hsa-miR-23b-3p	hsa-miR-502-3p
RASSF4	0.0949776	0.438573	0.460227	4	hsa-miR-103a-3p/hsa-miR-107	hsa-miR-15b-5p/hsa-miR-15b-5p	hsa-miR-338-3p	hsa-miR-342-3p
RSPO3	0.0949776	0.438573	0.460227	4	hsa-miR-103a-3p/hsa-miR-107	hsa-miR-15b-5p/hsa-miR-15b-5p	hsa-miR-200a-3p	hsa-miR-27a-3p
SAR1A	0.0949776	0.438573	0.460227	4	hsa-miR-199a-5p	hsa-miR-200a-3p	hsa-miR-338-3p	hsa-miR-433-3p
SCML2	0.0949776	0.438573	0.460227	4	hsa-miR-148a-3p	hsa-miR-181c-5p	hsa-miR-29b-3p	hsa-miR-301a-3p
SECISBP2L	0.0949776	0.438573	0.460227	4	hsa-let-7a-5p/hsa-let-7e-5p/hsa-let-7f-5p/hsa-let-7g-5p/hsa-miR-98-5p	hsa-miR-143-3p	hsa-miR-148a-3p	hsa-miR-301a-3p
SETD5	0.0949776	0.438573	0.460227	4	hsa-miR-103a-3p/hsa-miR-107	hsa-miR-132-3p/hsa-miR-212-3p	hsa-miR-27a-3p	hsa-miR-29b-3p
SMARCE1	0.0949776	0.438573	0.460227	4	hsa-miR-103a-3p/hsa-miR-107	hsa-miR-199a-5p	hsa-miR-200a-3p	hsa-miR-29b-3p
STX17	0.0949776	0.438573	0.460227	4	hsa-let-7a-5p/hsa-let-7e-5p/hsa-let-7f-5p/hsa-let-7g-5p/hsa-miR-98-5p	hsa-miR-15b-5p/hsa-miR-15b-5p	hsa-miR-23a-3p/hsa-miR-23b-3p	hsa-miR-29b-3p
TBC1D19	0.0949776	0.438573	0.460227	4	hsa-miR-103a-3p/hsa-miR-107	hsa-miR-15b-5p/hsa-miR-15b-5p	hsa-miR-221-3p	hsa-miR-433-3p
THAP2	0.0949776	0.438573	0.460227	4	hsa-miR-142-5p	hsa-miR-23a-3p/hsa-miR-23b-3p	hsa-miR-26a-5p/hsa-miR-26b-5p	hsa-miR-27a-3p
TIAM1	0.0949776	0.438573	0.460227	4	hsa-miR-142-5p	hsa-miR-200a-3p	hsa-miR-22-3p	hsa-miR-29b-3p
TMEM255A	0.0949776	0.438573	0.460227	4	hsa-let-7a-5p/hsa-let-7e-5p/hsa-let-7f-5p/hsa-let-7g-5p/hsa-miR-98-5p	hsa-miR-15b-5p/hsa-miR-15b-5p	hsa-miR-29b-3p	hsa-miR-338-3p
USP32	0.0949776	0.438573	0.460227	4	hsa-let-7a-5p/hsa-let-7e-5p/hsa-let-7f-5p/hsa-let-7g-5p/hsa-miR-98-5p	hsa-miR-133b	hsa-miR-148a-3p	hsa-miR-301a-3p
ZNF608	0.0949776	0.438573	0.460227	4	hsa-miR-193a-3p/hsa-miR-193b-3p	hsa-miR-26a-5p/hsa-miR-26b-5p	hsa-miR-27a-3p	hsa-miR-532-5p
CACNB4	0.0952885	0.438573	0.515455	5	hsa-let-7a-5p/hsa-let-7e-5p/hsa-let-7f-5p/hsa-let-7g-5p/hsa-miR-98-5p	hsa-miR-221-3p	hsa-miR-26a-5p/hsa-miR-26b-5p	hsa-miR-338-3p	hsa-miR-532-5p
CALCR	0.0952885	0.438573	0.515455	5	hsa-miR-181c-5p	hsa-miR-200a-3p	hsa-miR-22-3p	hsa-miR-23a-3p/hsa-miR-23b-3p	hsa-miR-29b-3p
CYP26B1	0.0952885	0.438573	0.515455	5	hsa-miR-142-5p	hsa-miR-15b-5p/hsa-miR-15b-5p	hsa-miR-181c-5p	hsa-miR-200a-3p	hsa-miR-342-3p
EPT1	0.0952885	0.438573	0.515455	5	hsa-miR-143-3p	hsa-miR-154-3p	hsa-miR-15b-5p/hsa-miR-15b-5p	hsa-miR-181c-5p	hsa-miR-23a-3p/hsa-miR-23b-3p
FAM73A	0.0952885	0.438573	0.515455	5	hsa-miR-103a-3p/hsa-miR-107	hsa-miR-133b	hsa-miR-15b-5p/hsa-miR-15b-5p	hsa-miR-23a-3p/hsa-miR-23b-3p	hsa-miR-301a-3p
FBN2	0.0952885	0.438573	0.515455	5	hsa-miR-133b	hsa-miR-221-3p	hsa-miR-22-3p	hsa-miR-23a-3p/hsa-miR-23b-3p	hsa-miR-502-3p
GHR	0.0952885	0.438573	0.515455	5	hsa-let-7a-5p/hsa-let-7e-5p/hsa-let-7f-5p/hsa-let-7g-5p/hsa-miR-98-5p	hsa-miR-132-3p/hsa-miR-212-3p	hsa-miR-143-3p	hsa-miR-15b-5p/hsa-miR-15b-5p	hsa-miR-23a-3p/hsa-miR-23b-3p
GIGYF1	0.0952885	0.438573	0.515455	5	hsa-miR-132-3p/hsa-miR-212-3p	hsa-miR-133b	hsa-miR-15b-5p/hsa-miR-15b-5p	hsa-miR-181c-5p	hsa-miR-200a-3p
GNAI3	0.0952885	0.438573	0.515455	5	hsa-miR-103a-3p/hsa-miR-107	hsa-miR-154-3p	hsa-miR-15b-5p/hsa-miR-15b-5p	hsa-miR-221-3p	hsa-miR-338-3p
HMGCS1	0.0952885	0.438573	0.515455	5	hsa-miR-142-5p	hsa-miR-200a-3p	hsa-miR-27a-3p	hsa-miR-29b-3p	hsa-miR-502-3p
MBOAT2	0.0952885	0.438573	0.515455	5	hsa-miR-143-3p	hsa-miR-148a-3p	hsa-miR-181c-5p	hsa-miR-200a-3p	hsa-miR-27a-3p
N4BP1	0.0952885	0.438573	0.515455	5	hsa-miR-103a-3p/hsa-miR-107	hsa-miR-15b-5p/hsa-miR-15b-5p	hsa-miR-23a-3p/hsa-miR-23b-3p	hsa-miR-27a-3p	hsa-miR-301a-3p
NRP1	0.0952885	0.438573	0.515455	5	hsa-miR-148a-3p	hsa-miR-181c-5p	hsa-miR-200a-3p	hsa-miR-301a-3p	hsa-miR-338-3p
ONECUT1	0.0952885	0.438573	0.515455	5	hsa-let-7a-5p/hsa-let-7e-5p/hsa-let-7f-5p/hsa-let-7g-5p/hsa-miR-98-5p	hsa-miR-142-5p	hsa-miR-200a-3p	hsa-miR-22-3p	hsa-miR-29b-3p
PSEN1	0.0952885	0.438573	0.515455	5	hsa-miR-133b	hsa-miR-148a-3p	hsa-miR-193a-3p/hsa-miR-193b-3p	hsa-miR-200a-3p	hsa-miR-27a-3p
QSER1	0.0952885	0.438573	0.515455	5	hsa-miR-142-5p	hsa-miR-181c-5p	hsa-miR-200a-3p	hsa-miR-23a-3p/hsa-miR-23b-3p	hsa-miR-301a-3p
RARB	0.0952885	0.438573	0.515455	5	hsa-miR-133b	hsa-miR-15b-5p/hsa-miR-15b-5p	hsa-miR-200a-3p	hsa-miR-29b-3p	hsa-miR-301a-3p
SALL1	0.0952885	0.438573	0.515455	5	hsa-miR-103a-3p/hsa-miR-107	hsa-miR-132-3p/hsa-miR-212-3p	hsa-miR-15b-5p/hsa-miR-15b-5p	hsa-miR-26a-5p/hsa-miR-26b-5p	hsa-miR-338-3p
SENP5	0.0952885	0.438573	0.515455	5	hsa-let-7a-5p/hsa-let-7e-5p/hsa-let-7f-5p/hsa-let-7g-5p/hsa-miR-98-5p	hsa-miR-103a-3p/hsa-miR-107	hsa-miR-142-5p	hsa-miR-15b-5p/hsa-miR-15b-5p	hsa-miR-26a-5p/hsa-miR-26b-5p
SLC6A1	0.0952885	0.438573	0.515455	5	hsa-let-7a-5p/hsa-let-7e-5p/hsa-let-7f-5p/hsa-let-7g-5p/hsa-miR-98-5p	hsa-miR-132-3p/hsa-miR-212-3p	hsa-miR-133b	hsa-miR-22-3p	hsa-miR-27a-3p
SNIP1	0.0952885	0.438573	0.515455	5	hsa-miR-132-3p/hsa-miR-212-3p	hsa-miR-142-5p	hsa-miR-15b-5p/hsa-miR-15b-5p	hsa-miR-29b-3p	hsa-miR-301a-3p
TFRC	0.0952885	0.438573	0.515455	5	hsa-miR-103a-3p/hsa-miR-107	hsa-miR-148a-3p	hsa-miR-15b-5p/hsa-miR-15b-5p	hsa-miR-200a-3p	hsa-miR-23a-3p/hsa-miR-23b-3p
THAP1	0.0952885	0.438573	0.515455	5	hsa-miR-181c-5p	hsa-miR-22-3p	hsa-miR-26a-5p/hsa-miR-26b-5p	hsa-miR-27a-3p	hsa-miR-342-3p
UBE2E3	0.0952885	0.438573	0.515455	5	hsa-miR-103a-3p/hsa-miR-107	hsa-miR-142-5p	hsa-miR-143-3p	hsa-miR-29b-3p	hsa-miR-532-5p
UNC13A	0.0952885	0.438573	0.515455	5	hsa-miR-133b	hsa-miR-15b-5p/hsa-miR-15b-5p	hsa-miR-23a-3p/hsa-miR-23b-3p	hsa-miR-301a-3p	hsa-miR-433-3p
WDR82	0.0952885	0.438573	0.515455	5	hsa-miR-15b-5p/hsa-miR-15b-5p	hsa-miR-181c-5p	hsa-miR-193a-3p/hsa-miR-193b-3p	hsa-miR-22-3p	hsa-miR-502-3p
ZNF697	0.0952885	0.438573	0.515455	5	hsa-let-7a-5p/hsa-let-7e-5p/hsa-let-7f-5p/hsa-let-7g-5p/hsa-miR-98-5p	hsa-miR-15b-5p/hsa-miR-15b-5p	hsa-miR-181c-5p	hsa-miR-23a-3p/hsa-miR-23b-3p	hsa-miR-26a-5p/hsa-miR-26b-5p
CBX5	0.0957142	0.438573	0.691736	11	hsa-let-7a-5p/hsa-let-7e-5p/hsa-let-7f-5p/hsa-let-7g-5p/hsa-miR-98-5p	hsa-miR-143-3p	hsa-miR-148a-3p	hsa-miR-15b-5p/hsa-miR-15b-5p	hsa-miR-181c-5p	hsa-miR-199a-5p	hsa-miR-200a-3p	hsa-miR-23a-3p/hsa-miR-23b-3p	hsa-miR-27a-3p	hsa-miR-29b-3p	hsa-miR-342-3p
UBN2	0.0957142	0.438573	0.691736	11	hsa-let-7a-5p/hsa-let-7e-5p/hsa-let-7f-5p/hsa-let-7g-5p/hsa-miR-98-5p	hsa-miR-148a-3p	hsa-miR-15b-5p/hsa-miR-15b-5p	hsa-miR-181c-5p	hsa-miR-199a-5p	hsa-miR-221-3p	hsa-miR-23a-3p/hsa-miR-23b-3p	hsa-miR-26a-5p/hsa-miR-26b-5p	hsa-miR-27a-3p	hsa-miR-29b-3p	hsa-miR-301a-3p
ABCA1	0.097235	0.438573	0.596104	7	hsa-miR-142-5p	hsa-miR-148a-3p	hsa-miR-199a-5p	hsa-miR-23a-3p/hsa-miR-23b-3p	hsa-miR-26a-5p/hsa-miR-26b-5p	hsa-miR-27a-3p	hsa-miR-301a-3p
BCL2L2	0.097235	0.438573	0.596104	7	hsa-miR-103a-3p/hsa-miR-107	hsa-miR-133b	hsa-miR-148a-3p	hsa-miR-15b-5p/hsa-miR-15b-5p	hsa-miR-193a-3p/hsa-miR-193b-3p	hsa-miR-29b-3p	hsa-miR-338-3p
CCNJ	0.097235	0.438573	0.596104	7	hsa-let-7a-5p/hsa-let-7e-5p/hsa-let-7f-5p/hsa-let-7g-5p/hsa-miR-98-5p	hsa-miR-103a-3p/hsa-miR-107	hsa-miR-181c-5p	hsa-miR-199a-5p	hsa-miR-26a-5p/hsa-miR-26b-5p	hsa-miR-27a-3p	hsa-miR-29b-3p
ZNRF2	0.097235	0.438573	0.596104	7	hsa-miR-103a-3p/hsa-miR-107	hsa-miR-15b-5p/hsa-miR-15b-5p	hsa-miR-181c-5p	hsa-miR-200a-3p	hsa-miR-22-3p	hsa-miR-23a-3p/hsa-miR-23b-3p	hsa-miR-27a-3p
ZNF704	0.0986334	0.438573	0.675	10	hsa-miR-148a-3p	hsa-miR-15b-5p/hsa-miR-15b-5p	hsa-miR-181c-5p	hsa-miR-199a-5p	hsa-miR-200a-3p	hsa-miR-22-3p	hsa-miR-27a-3p	hsa-miR-29b-3p	hsa-miR-301a-3p	hsa-miR-433-3p
CHD7	0.0999449	0.438573	0.628977	8	hsa-let-7a-5p/hsa-let-7e-5p/hsa-let-7f-5p/hsa-let-7g-5p/hsa-miR-98-5p	hsa-miR-148a-3p	hsa-miR-15b-5p/hsa-miR-15b-5p	hsa-miR-181c-5p	hsa-miR-221-3p	hsa-miR-22-3p	hsa-miR-23a-3p/hsa-miR-23b-3p	hsa-miR-27a-3p
FZD4	0.0999449	0.438573	0.628977	8	hsa-let-7a-5p/hsa-let-7e-5p/hsa-let-7f-5p/hsa-let-7g-5p/hsa-miR-98-5p	hsa-miR-103a-3p/hsa-miR-107	hsa-miR-15b-5p/hsa-miR-15b-5p	hsa-miR-199a-5p	hsa-miR-200a-3p	hsa-miR-23a-3p/hsa-miR-23b-3p	hsa-miR-27a-3p	hsa-miR-29b-3p
NCKAP1	0.0999449	0.438573	0.628977	8	hsa-miR-142-5p	hsa-miR-148a-3p	hsa-miR-15b-5p/hsa-miR-15b-5p	hsa-miR-199a-5p	hsa-miR-23a-3p/hsa-miR-23b-3p	hsa-miR-301a-3p	hsa-miR-342-3p	hsa-miR-433-3p
CYB561D1	0.105762	0.438573	0.572727	6	hsa-let-7a-5p/hsa-let-7e-5p/hsa-let-7f-5p/hsa-let-7g-5p/hsa-miR-98-5p	hsa-miR-127-3p	hsa-miR-143-3p	hsa-miR-15b-5p/hsa-miR-15b-5p	hsa-miR-23a-3p/hsa-miR-23b-3p	hsa-miR-29b-3p
DCUN1D5	0.105762	0.438573	0.572727	6	hsa-miR-103a-3p/hsa-miR-107	hsa-miR-15b-5p/hsa-miR-15b-5p	hsa-miR-23a-3p/hsa-miR-23b-3p	hsa-miR-27a-3p	hsa-miR-29b-3p	hsa-miR-502-3p
DNAL1	0.105762	0.438573	0.572727	6	hsa-let-7a-5p/hsa-let-7e-5p/hsa-let-7f-5p/hsa-let-7g-5p/hsa-miR-98-5p	hsa-miR-142-5p	hsa-miR-181c-5p	hsa-miR-221-3p	hsa-miR-29b-3p	hsa-miR-301a-3p
HIPK1	0.105762	0.438573	0.572727	6	hsa-miR-142-5p	hsa-miR-181c-5p	hsa-miR-200a-3p	hsa-miR-221-3p	hsa-miR-22-3p	hsa-miR-26a-5p/hsa-miR-26b-5p
MDM4	0.105762	0.438573	0.572727	6	hsa-let-7a-5p/hsa-let-7e-5p/hsa-let-7f-5p/hsa-let-7g-5p/hsa-miR-98-5p	hsa-miR-148a-3p	hsa-miR-221-3p	hsa-miR-27a-3p	hsa-miR-301a-3p	hsa-miR-342-3p
MEGF9	0.105762	0.438573	0.572727	6	hsa-miR-143-3p	hsa-miR-154-3p	hsa-miR-181c-5p	hsa-miR-200a-3p	hsa-miR-221-3p	hsa-miR-26a-5p/hsa-miR-26b-5p
NAV1	0.105762	0.438573	0.572727	6	hsa-miR-103a-3p/hsa-miR-107	hsa-miR-15b-5p/hsa-miR-15b-5p	hsa-miR-26a-5p/hsa-miR-26b-5p	hsa-miR-27a-3p	hsa-miR-29b-3p	hsa-miR-433-3p
PEAK1	0.105762	0.438573	0.572727	6	hsa-miR-133b	hsa-miR-181c-5p	hsa-miR-200a-3p	hsa-miR-27a-3p	hsa-miR-29b-3p	hsa-miR-338-3p
PRICKLE2	0.105762	0.438573	0.572727	6	hsa-miR-132-3p/hsa-miR-212-3p	hsa-miR-148a-3p	hsa-miR-181c-5p	hsa-miR-27a-3p	hsa-miR-29b-3p	hsa-miR-301a-3p
RFX7	0.105762	0.438573	0.572727	6	hsa-miR-148a-3p	hsa-miR-200a-3p	hsa-miR-221-3p	hsa-miR-26a-5p/hsa-miR-26b-5p	hsa-miR-29b-3p	hsa-miR-301a-3p
RUNX1	0.105762	0.438573	0.572727	6	hsa-miR-15b-5p/hsa-miR-15b-5p	hsa-miR-181c-5p	hsa-miR-200a-3p	hsa-miR-22-3p	hsa-miR-23a-3p/hsa-miR-23b-3p	hsa-miR-27a-3p
SGMS2	0.105762	0.438573	0.572727	6	hsa-miR-103a-3p/hsa-miR-107	hsa-miR-133b	hsa-miR-15b-5p/hsa-miR-15b-5p	hsa-miR-29b-3p	hsa-miR-342-3p	hsa-miR-433-3p
NFIA	0.106087	0.438573	0.702893	11	hsa-miR-103a-3p/hsa-miR-107	hsa-miR-132-3p/hsa-miR-212-3p	hsa-miR-133b	hsa-miR-142-5p	hsa-miR-191-5p	hsa-miR-200a-3p	hsa-miR-23a-3p/hsa-miR-23b-3p	hsa-miR-27a-3p	hsa-miR-29b-3p	hsa-miR-301a-3p	hsa-miR-338-3p
ABHD17C	0.109948	0.438573	0.409091	3	hsa-let-7a-5p/hsa-let-7e-5p/hsa-let-7f-5p/hsa-let-7g-5p/hsa-miR-98-5p	hsa-miR-199a-5p	hsa-miR-27a-3p
ADCY2	0.109948	0.438573	0.409091	3	hsa-miR-148a-3p	hsa-miR-301a-3p	hsa-miR-502-3p
ARF3	0.109948	0.438573	0.409091	3	hsa-miR-132-3p/hsa-miR-212-3p	hsa-miR-181c-5p	hsa-miR-27a-3p
ARID3B	0.109948	0.438573	0.409091	3	hsa-let-7a-5p/hsa-let-7e-5p/hsa-let-7f-5p/hsa-let-7g-5p/hsa-miR-98-5p	hsa-miR-143-3p	hsa-miR-23a-3p/hsa-miR-23b-3p
ATP5G3	0.109948	0.438573	0.409091	3	hsa-miR-27a-3p	hsa-miR-29b-3p	hsa-miR-342-3p
BCL2L1	0.109948	0.438573	0.409091	3	hsa-let-7a-5p/hsa-let-7e-5p/hsa-let-7f-5p/hsa-let-7g-5p/hsa-miR-98-5p	hsa-miR-133b	hsa-miR-342-3p
CDKN1A	0.109948	0.438573	0.409091	3	hsa-let-7a-5p/hsa-let-7e-5p/hsa-let-7f-5p/hsa-let-7g-5p/hsa-miR-98-5p	hsa-miR-132-3p/hsa-miR-212-3p	hsa-miR-301a-3p
CHD6	0.109948	0.438573	0.409091	3	hsa-miR-103a-3p/hsa-miR-107	hsa-miR-143-3p	hsa-miR-15b-5p/hsa-miR-15b-5p
CHST2	0.109948	0.438573	0.409091	3	hsa-miR-26a-5p/hsa-miR-26b-5p	hsa-miR-27a-3p	hsa-miR-532-5p
CTCF	0.109948	0.438573	0.409091	3	hsa-miR-221-3p	hsa-miR-23a-3p/hsa-miR-23b-3p	hsa-miR-27a-3p
DDX19B	0.109948	0.438573	0.409091	3	hsa-let-7a-5p/hsa-let-7e-5p/hsa-let-7f-5p/hsa-let-7g-5p/hsa-miR-98-5p	hsa-miR-133b	hsa-miR-15b-5p/hsa-miR-15b-5p
ETS2	0.109948	0.438573	0.409091	3	hsa-miR-199a-5p	hsa-miR-221-3p	hsa-miR-22-3p
EXOC8	0.109948	0.438573	0.409091	3	hsa-miR-199a-5p	hsa-miR-23a-3p/hsa-miR-23b-3p	hsa-miR-532-5p
F3	0.109948	0.438573	0.409091	3	hsa-miR-148a-3p	hsa-miR-27a-3p	hsa-miR-301a-3p
FAM169A	0.109948	0.438573	0.409091	3	hsa-miR-199a-5p	hsa-miR-26a-5p/hsa-miR-26b-5p	hsa-miR-338-3p
FAT4	0.109948	0.438573	0.409091	3	hsa-miR-103a-3p/hsa-miR-107	hsa-miR-15b-5p/hsa-miR-15b-5p	hsa-miR-193a-3p/hsa-miR-193b-3p
GK	0.109948	0.438573	0.409091	3	hsa-miR-103a-3p/hsa-miR-107	hsa-miR-142-5p	hsa-miR-27a-3p
GNAO1	0.109948	0.438573	0.409091	3	hsa-miR-103a-3p/hsa-miR-107	hsa-miR-181c-5p	hsa-miR-193a-3p/hsa-miR-193b-3p
GRAP2	0.109948	0.438573	0.409091	3	hsa-miR-23a-3p/hsa-miR-23b-3p	hsa-miR-26a-5p/hsa-miR-26b-5p	hsa-miR-29b-3p
GRM1	0.109948	0.438573	0.409091	3	hsa-miR-181c-5p	hsa-miR-221-3p	hsa-miR-22-3p
HAT1	0.109948	0.438573	0.409091	3	hsa-miR-143-3p	hsa-miR-27a-3p	hsa-miR-342-3p
HMGN2	0.109948	0.438573	0.409091	3	hsa-miR-103a-3p/hsa-miR-107	hsa-miR-132-3p/hsa-miR-212-3p	hsa-miR-23a-3p/hsa-miR-23b-3p
HOXA10	0.109948	0.438573	0.409091	3	hsa-miR-142-5p	hsa-miR-15b-5p/hsa-miR-15b-5p	hsa-miR-27a-3p
HTT	0.109948	0.438573	0.409091	3	hsa-miR-103a-3p/hsa-miR-107	hsa-miR-181c-5p	hsa-miR-27a-3p
IGDCC3	0.109948	0.438573	0.409091	3	hsa-let-7a-5p/hsa-let-7e-5p/hsa-let-7f-5p/hsa-let-7g-5p/hsa-miR-98-5p	hsa-miR-181c-5p	hsa-miR-23a-3p/hsa-miR-23b-3p
IGDCC4	0.109948	0.438573	0.409091	3	hsa-let-7a-5p/hsa-let-7e-5p/hsa-let-7f-5p/hsa-let-7g-5p/hsa-miR-98-5p	hsa-miR-200a-3p	hsa-miR-532-5p
KCNK2	0.109948	0.438573	0.409091	3	hsa-miR-132-3p/hsa-miR-212-3p	hsa-miR-221-3p	hsa-miR-27a-3p
KLHL5	0.109948	0.438573	0.409091	3	hsa-miR-148a-3p	hsa-miR-181c-5p	hsa-miR-23a-3p/hsa-miR-23b-3p
LHX8	0.109948	0.438573	0.409091	3	hsa-miR-142-5p	hsa-miR-221-3p	hsa-miR-27a-3p
LIG3	0.109948	0.438573	0.409091	3	hsa-miR-142-5p	hsa-miR-26a-5p/hsa-miR-26b-5p	hsa-miR-29b-3p
LONRF1	0.109948	0.438573	0.409091	3	hsa-miR-103a-3p/hsa-miR-107	hsa-miR-27a-3p	hsa-miR-301a-3p
MAP1A	0.109948	0.438573	0.409091	3	hsa-miR-15b-5p/hsa-miR-15b-5p	hsa-miR-181c-5p	hsa-miR-26a-5p/hsa-miR-26b-5p
MAP4	0.109948	0.438573	0.409091	3	hsa-miR-103a-3p/hsa-miR-107	hsa-miR-15b-5p/hsa-miR-15b-5p	hsa-miR-301a-3p
MESDC1	0.109948	0.438573	0.409091	3	hsa-let-7a-5p/hsa-let-7e-5p/hsa-let-7f-5p/hsa-let-7g-5p/hsa-miR-98-5p	hsa-miR-221-3p	hsa-miR-27a-3p
MLK4	0.109948	0.438573	0.409091	3	hsa-miR-103a-3p/hsa-miR-107	hsa-miR-15b-5p/hsa-miR-15b-5p	hsa-miR-23a-3p/hsa-miR-23b-3p
MVB12B	0.109948	0.438573	0.409091	3	hsa-let-7a-5p/hsa-let-7e-5p/hsa-let-7f-5p/hsa-let-7g-5p/hsa-miR-98-5p	hsa-miR-200a-3p	hsa-miR-27a-3p
MYNN	0.109948	0.438573	0.409091	3	hsa-miR-103a-3p/hsa-miR-107	hsa-miR-23a-3p/hsa-miR-23b-3p	hsa-miR-502-3p
NCALD	0.109948	0.438573	0.409091	3	hsa-miR-132-3p/hsa-miR-212-3p	hsa-miR-181c-5p	hsa-miR-27a-3p
OIP5	0.109948	0.438573	0.409091	3	hsa-miR-103a-3p/hsa-miR-107	hsa-miR-15b-5p/hsa-miR-15b-5p	hsa-miR-221-3p
PALD1	0.109948	0.438573	0.409091	3	hsa-let-7a-5p/hsa-let-7e-5p/hsa-let-7f-5p/hsa-let-7g-5p/hsa-miR-98-5p	hsa-miR-22-3p	hsa-miR-23a-3p/hsa-miR-23b-3p
PDCD10	0.109948	0.438573	0.409091	3	hsa-miR-103a-3p/hsa-miR-107	hsa-miR-221-3p	hsa-miR-26a-5p/hsa-miR-26b-5p
PHAX	0.109948	0.438573	0.409091	3	hsa-miR-148a-3p	hsa-miR-26a-5p/hsa-miR-26b-5p	hsa-miR-301a-3p
PLEKHA1	0.109948	0.438573	0.409091	3	hsa-miR-103a-3p/hsa-miR-107	hsa-miR-15b-5p/hsa-miR-15b-5p	hsa-miR-29b-3p
RALGAPA2	0.109948	0.438573	0.409091	3	hsa-miR-181c-5p	hsa-miR-27a-3p	hsa-miR-301a-3p
RBAK	0.109948	0.438573	0.409091	3	hsa-miR-103a-3p/hsa-miR-107	hsa-miR-181c-5p	hsa-miR-29b-3p
RP6-24A23.6	0.109948	0.438573	0.409091	3	hsa-miR-103a-3p/hsa-miR-107	hsa-miR-154-3p	hsa-miR-338-3p
RSPO2	0.109948	0.438573	0.409091	3	hsa-let-7a-5p/hsa-let-7e-5p/hsa-let-7f-5p/hsa-let-7g-5p/hsa-miR-98-5p	hsa-miR-15b-5p/hsa-miR-15b-5p	hsa-miR-181c-5p
SESN1	0.109948	0.438573	0.409091	3	hsa-miR-133b	hsa-miR-15b-5p/hsa-miR-15b-5p	hsa-miR-29b-3p
SLC16A14	0.109948	0.438573	0.409091	3	hsa-let-7a-5p/hsa-let-7e-5p/hsa-let-7f-5p/hsa-let-7g-5p/hsa-miR-98-5p	hsa-miR-22-3p	hsa-miR-29b-3p
SLC27A4	0.109948	0.438573	0.409091	3	hsa-miR-133b	hsa-miR-27a-3p	hsa-miR-338-3p
SLIT1	0.109948	0.438573	0.409091	3	hsa-miR-142-5p	hsa-miR-181c-5p	hsa-miR-23a-3p/hsa-miR-23b-3p
SMEK2	0.109948	0.438573	0.409091	3	hsa-miR-103a-3p/hsa-miR-107	hsa-miR-23a-3p/hsa-miR-23b-3p	hsa-miR-29b-3p
SRL	0.109948	0.438573	0.409091	3	hsa-miR-199a-5p	hsa-miR-22-3p	hsa-miR-27a-3p
STK38	0.109948	0.438573	0.409091	3	hsa-miR-142-5p	hsa-miR-15b-5p/hsa-miR-15b-5p	hsa-miR-433-3p
SYDE2	0.109948	0.438573	0.409091	3	hsa-miR-103a-3p/hsa-miR-107	hsa-miR-142-5p	hsa-miR-15b-5p/hsa-miR-15b-5p
TTC14	0.109948	0.438573	0.409091	3	hsa-miR-15b-5p/hsa-miR-15b-5p	hsa-miR-29b-3p	hsa-miR-532-5p
UACA	0.109948	0.438573	0.409091	3	hsa-miR-200a-3p	hsa-miR-23a-3p/hsa-miR-23b-3p	hsa-miR-29b-3p
VHL	0.109948	0.438573	0.409091	3	hsa-miR-142-5p	hsa-miR-181c-5p	hsa-miR-29b-3p
VPS26B	0.109948	0.438573	0.409091	3	hsa-let-7a-5p/hsa-let-7e-5p/hsa-let-7f-5p/hsa-let-7g-5p/hsa-miR-98-5p	hsa-miR-200a-3p	hsa-miR-27a-3p
WNT4	0.109948	0.438573	0.409091	3	hsa-miR-103a-3p/hsa-miR-107	hsa-miR-133b	hsa-miR-15b-5p/hsa-miR-15b-5p
WWP1	0.109948	0.438573	0.409091	3	hsa-miR-103a-3p/hsa-miR-107	hsa-miR-142-5p	hsa-miR-15b-5p/hsa-miR-15b-5p
XPOT	0.109948	0.438573	0.409091	3	hsa-let-7a-5p/hsa-let-7e-5p/hsa-let-7f-5p/hsa-let-7g-5p/hsa-miR-98-5p	hsa-miR-142-5p	hsa-miR-199a-5p
ZNF518B	0.109948	0.438573	0.409091	3	hsa-miR-15b-5p/hsa-miR-15b-5p	hsa-miR-221-3p	hsa-miR-29b-3p
ZSWIM4	0.109948	0.438573	0.409091	3	hsa-let-7a-5p/hsa-let-7e-5p/hsa-let-7f-5p/hsa-let-7g-5p/hsa-miR-98-5p	hsa-miR-199a-5p	hsa-miR-221-3p
CNOT2	0.11096	0.438573	0.613636	7	hsa-let-7a-5p/hsa-let-7e-5p/hsa-let-7f-5p/hsa-let-7g-5p/hsa-miR-98-5p	hsa-miR-132-3p/hsa-miR-212-3p	hsa-miR-181c-5p	hsa-miR-200a-3p	hsa-miR-221-3p	hsa-miR-23a-3p/hsa-miR-23b-3p	hsa-miR-301a-3p
FBXO33	0.11096	0.438573	0.613636	7	hsa-miR-148a-3p	hsa-miR-15b-5p/hsa-miR-15b-5p	hsa-miR-181c-5p	hsa-miR-199a-5p	hsa-miR-23a-3p/hsa-miR-23b-3p	hsa-miR-27a-3p	hsa-miR-338-3p
HSPA4L	0.11096	0.438573	0.613636	7	hsa-miR-133b	hsa-miR-142-5p	hsa-miR-143-3p	hsa-miR-148a-3p	hsa-miR-15b-5p/hsa-miR-15b-5p	hsa-miR-26a-5p/hsa-miR-26b-5p	hsa-miR-29b-3p
UBE2K	0.11096	0.438573	0.613636	7	hsa-miR-133b	hsa-miR-15b-5p/hsa-miR-15b-5p	hsa-miR-23a-3p/hsa-miR-23b-3p	hsa-miR-26a-5p/hsa-miR-26b-5p	hsa-miR-27a-3p	hsa-miR-29b-3p	hsa-miR-338-3p
ADCYAP1	0.112704	0.438573	0.54	5	hsa-miR-103a-3p/hsa-miR-107	hsa-miR-132-3p/hsa-miR-212-3p	hsa-miR-133b	hsa-miR-23a-3p/hsa-miR-23b-3p	hsa-miR-301a-3p
AMER1	0.112704	0.438573	0.54	5	hsa-miR-143-3p	hsa-miR-148a-3p	hsa-miR-15b-5p/hsa-miR-15b-5p	hsa-miR-23a-3p/hsa-miR-23b-3p	hsa-miR-29b-3p
ATP1B1	0.112704	0.438573	0.54	5	hsa-miR-142-5p	hsa-miR-181c-5p	hsa-miR-200a-3p	hsa-miR-221-3p	hsa-miR-29b-3p
CCDC71L	0.112704	0.438573	0.54	5	hsa-let-7a-5p/hsa-let-7e-5p/hsa-let-7f-5p/hsa-let-7g-5p/hsa-miR-98-5p	hsa-miR-132-3p/hsa-miR-212-3p	hsa-miR-22-3p	hsa-miR-23a-3p/hsa-miR-23b-3p	hsa-miR-301a-3p
CDS2	0.112704	0.438573	0.54	5	hsa-miR-15b-5p/hsa-miR-15b-5p	hsa-miR-181c-5p	hsa-miR-200a-3p	hsa-miR-23a-3p/hsa-miR-23b-3p	hsa-miR-27a-3p
GPR124	0.112704	0.438573	0.54	5	hsa-miR-103a-3p/hsa-miR-107	hsa-miR-143-3p	hsa-miR-15b-5p/hsa-miR-15b-5p	hsa-miR-199a-5p	hsa-miR-338-3p
HIAT1	0.112704	0.438573	0.54	5	hsa-miR-142-5p	hsa-miR-200a-3p	hsa-miR-23a-3p/hsa-miR-23b-3p	hsa-miR-26a-5p/hsa-miR-26b-5p	hsa-miR-301a-3p
KIAA1462	0.112704	0.438573	0.54	5	hsa-miR-142-5p	hsa-miR-181c-5p	hsa-miR-23a-3p/hsa-miR-23b-3p	hsa-miR-301a-3p	hsa-miR-342-3p
LRP1B	0.112704	0.438573	0.54	5	hsa-miR-103a-3p/hsa-miR-107	hsa-miR-142-5p	hsa-miR-15b-5p/hsa-miR-15b-5p	hsa-miR-200a-3p	hsa-miR-301a-3p
MAGI2	0.112704	0.438573	0.54	5	hsa-miR-142-5p	hsa-miR-154-3p	hsa-miR-200a-3p	hsa-miR-22-3p	hsa-miR-27a-3p
NEURL1B	0.112704	0.438573	0.54	5	hsa-miR-148a-3p	hsa-miR-181c-5p	hsa-miR-27a-3p	hsa-miR-301a-3p	hsa-miR-342-3p
PIK3R3	0.112704	0.438573	0.54	5	hsa-miR-148a-3p	hsa-miR-181c-5p	hsa-miR-23a-3p/hsa-miR-23b-3p	hsa-miR-26a-5p/hsa-miR-26b-5p	hsa-miR-29b-3p
RANBP2	0.112704	0.438573	0.54	5	hsa-let-7a-5p/hsa-let-7e-5p/hsa-let-7f-5p/hsa-let-7g-5p/hsa-miR-98-5p	hsa-miR-142-5p	hsa-miR-154-3p	hsa-miR-199a-5p	hsa-miR-221-3p
STX16	0.112704	0.438573	0.54	5	hsa-miR-132-3p/hsa-miR-212-3p	hsa-miR-193a-3p/hsa-miR-193b-3p	hsa-miR-200a-3p	hsa-miR-27a-3p	hsa-miR-29b-3p
TTC9	0.112704	0.438573	0.54	5	hsa-miR-103a-3p/hsa-miR-107	hsa-miR-199a-5p	hsa-miR-22-3p	hsa-miR-27a-3p	hsa-miR-29b-3p
CBL	0.112719	0.438573	0.644318	8	hsa-let-7a-5p/hsa-let-7e-5p/hsa-let-7f-5p/hsa-let-7g-5p/hsa-miR-98-5p	hsa-miR-143-3p	hsa-miR-199a-5p	hsa-miR-200a-3p	hsa-miR-221-3p	hsa-miR-22-3p	hsa-miR-338-3p	hsa-miR-502-3p
MEIS1	0.112719	0.438573	0.644318	8	hsa-let-7a-5p/hsa-let-7e-5p/hsa-let-7f-5p/hsa-let-7g-5p/hsa-miR-98-5p	hsa-miR-132-3p/hsa-miR-212-3p	hsa-miR-133b	hsa-miR-142-5p	hsa-miR-154-3p	hsa-miR-221-3p	hsa-miR-23a-3p/hsa-miR-23b-3p	hsa-miR-532-5p
ZEB2	0.112719	0.438573	0.644318	8	hsa-miR-132-3p/hsa-miR-212-3p	hsa-miR-154-3p	hsa-miR-181c-5p	hsa-miR-200a-3p	hsa-miR-221-3p	hsa-miR-26a-5p/hsa-miR-26b-5p	hsa-miR-27a-3p	hsa-miR-301a-3p
AGPAT9	0.114979	0.438573	0.306818	2	hsa-let-7a-5p/hsa-let-7e-5p/hsa-let-7f-5p/hsa-let-7g-5p/hsa-miR-98-5p	hsa-miR-23a-3p/hsa-miR-23b-3p
ANP32A	0.114979	0.438573	0.306818	2	hsa-miR-132-3p/hsa-miR-212-3p	hsa-miR-181c-5p
AP5S1	0.114979	0.438573	0.306818	2	hsa-miR-29b-3p	hsa-miR-338-3p
ARHGAP39	0.114979	0.438573	0.306818	2	hsa-miR-133b	hsa-miR-193a-3p/hsa-miR-193b-3p
ARHGEF5	0.114979	0.438573	0.306818	2	hsa-miR-199a-5p	hsa-miR-23a-3p/hsa-miR-23b-3p
ASAH2B	0.114979	0.438573	0.306818	2	hsa-miR-181c-5p	hsa-miR-23a-3p/hsa-miR-23b-3p
ASCL1	0.114979	0.438573	0.306818	2	hsa-miR-142-5p	hsa-miR-22-3p
B4GALT4	0.114979	0.438573	0.306818	2	hsa-miR-142-5p	hsa-miR-26a-5p/hsa-miR-26b-5p
BLOC1S2	0.114979	0.438573	0.306818	2	hsa-miR-23a-3p/hsa-miR-23b-3p	hsa-miR-26a-5p/hsa-miR-26b-5p
BRD3	0.114979	0.438573	0.306818	2	hsa-miR-200a-3p	hsa-miR-338-3p
C12orf68	0.114979	0.438573	0.306818	2	hsa-miR-143-3p	hsa-miR-342-3p
CCDC71	0.114979	0.438573	0.306818	2	hsa-miR-148a-3p	hsa-miR-27a-3p
CCT6A	0.114979	0.438573	0.306818	2	hsa-miR-148a-3p	hsa-miR-301a-3p
CDC23	0.114979	0.438573	0.306818	2	hsa-miR-15b-5p/hsa-miR-15b-5p	hsa-miR-23a-3p/hsa-miR-23b-3p
CDC34	0.114979	0.438573	0.306818	2	hsa-let-7a-5p/hsa-let-7e-5p/hsa-let-7f-5p/hsa-let-7g-5p/hsa-miR-98-5p	hsa-miR-142-5p
CDCA4	0.114979	0.438573	0.306818	2	hsa-miR-15b-5p/hsa-miR-15b-5p	hsa-miR-29b-3p
CHFR	0.114979	0.438573	0.306818	2	hsa-miR-26a-5p/hsa-miR-26b-5p	hsa-miR-29b-3p
CHORDC1	0.114979	0.438573	0.306818	2	hsa-miR-15b-5p/hsa-miR-15b-5p	hsa-miR-26a-5p/hsa-miR-26b-5p
COL22A1	0.114979	0.438573	0.306818	2	hsa-miR-26a-5p/hsa-miR-26b-5p	hsa-miR-29b-3p
COL3A1	0.114979	0.438573	0.306818	2	hsa-let-7a-5p/hsa-let-7e-5p/hsa-let-7f-5p/hsa-let-7g-5p/hsa-miR-98-5p	hsa-miR-29b-3p
COL4A6	0.114979	0.438573	0.306818	2	hsa-let-7a-5p/hsa-let-7e-5p/hsa-let-7f-5p/hsa-let-7g-5p/hsa-miR-98-5p	hsa-miR-29b-3p
CSDC2	0.114979	0.438573	0.306818	2	hsa-miR-199a-5p	hsa-miR-27a-3p
DPH3	0.114979	0.438573	0.306818	2	hsa-let-7a-5p/hsa-let-7e-5p/hsa-let-7f-5p/hsa-let-7g-5p/hsa-miR-98-5p	hsa-miR-433-3p
DPY19L4	0.114979	0.438573	0.306818	2	hsa-miR-15b-5p/hsa-miR-15b-5p	hsa-miR-433-3p
DRD1	0.114979	0.438573	0.306818	2	hsa-miR-142-5p	hsa-miR-181c-5p
DSG3	0.114979	0.438573	0.306818	2	hsa-let-7a-5p/hsa-let-7e-5p/hsa-let-7f-5p/hsa-let-7g-5p/hsa-miR-98-5p	hsa-miR-29b-3p
DUSP22	0.114979	0.438573	0.306818	2	hsa-let-7a-5p/hsa-let-7e-5p/hsa-let-7f-5p/hsa-let-7g-5p/hsa-miR-98-5p	hsa-miR-29b-3p
DYNC1I1	0.114979	0.438573	0.306818	2	hsa-miR-103a-3p/hsa-miR-107	hsa-miR-15b-5p/hsa-miR-15b-5p
EMC4	0.114979	0.438573	0.306818	2	hsa-miR-142-5p	hsa-miR-15b-5p/hsa-miR-15b-5p
ESR2	0.114979	0.438573	0.306818	2	hsa-miR-15b-5p/hsa-miR-15b-5p	hsa-miR-338-3p
FAM101B	0.114979	0.438573	0.306818	2	hsa-miR-15b-5p/hsa-miR-15b-5p	hsa-miR-29b-3p
FAM83G	0.114979	0.438573	0.306818	2	hsa-let-7a-5p/hsa-let-7e-5p/hsa-let-7f-5p/hsa-let-7g-5p/hsa-miR-98-5p	hsa-miR-143-3p
FAS	0.114979	0.438573	0.306818	2	hsa-let-7a-5p/hsa-let-7e-5p/hsa-let-7f-5p/hsa-let-7g-5p/hsa-miR-98-5p	hsa-miR-23a-3p/hsa-miR-23b-3p
FOXL2	0.114979	0.438573	0.306818	2	hsa-miR-133b	hsa-miR-23a-3p/hsa-miR-23b-3p
FREM1	0.114979	0.438573	0.306818	2	hsa-miR-23a-3p/hsa-miR-23b-3p	hsa-miR-29b-3p
FSD1	0.114979	0.438573	0.306818	2	hsa-miR-15b-5p/hsa-miR-15b-5p	hsa-miR-199a-5p
G6PC2	0.114979	0.438573	0.306818	2	hsa-miR-27a-3p	hsa-miR-338-3p
GALNT15	0.114979	0.438573	0.306818	2	hsa-let-7a-5p/hsa-let-7e-5p/hsa-let-7f-5p/hsa-let-7g-5p/hsa-miR-98-5p	hsa-miR-142-5p
GATM	0.114979	0.438573	0.306818	2	hsa-let-7a-5p/hsa-let-7e-5p/hsa-let-7f-5p/hsa-let-7g-5p/hsa-miR-98-5p	hsa-miR-22-3p
GDPD1	0.114979	0.438573	0.306818	2	hsa-let-7a-5p/hsa-let-7e-5p/hsa-let-7f-5p/hsa-let-7g-5p/hsa-miR-98-5p	hsa-miR-181c-5p
GIPC1	0.114979	0.438573	0.306818	2	hsa-let-7a-5p/hsa-let-7e-5p/hsa-let-7f-5p/hsa-let-7g-5p/hsa-miR-98-5p	hsa-miR-27a-3p
GMNC	0.114979	0.438573	0.306818	2	hsa-miR-26a-5p/hsa-miR-26b-5p	hsa-miR-301a-3p
GNA12	0.114979	0.438573	0.306818	2	hsa-miR-132-3p/hsa-miR-212-3p	hsa-miR-15b-5p/hsa-miR-15b-5p
GPN2	0.114979	0.438573	0.306818	2	hsa-miR-142-5p	hsa-miR-15b-5p/hsa-miR-15b-5p
GPR133	0.114979	0.438573	0.306818	2	hsa-miR-142-5p	hsa-miR-27a-3p
HNRNPH1	0.114979	0.438573	0.306818	2	hsa-miR-181c-5p	hsa-miR-22-3p
HOXA7	0.114979	0.438573	0.306818	2	hsa-miR-199a-5p	hsa-miR-221-3p
HOXB4	0.114979	0.438573	0.306818	2	hsa-miR-181c-5p	hsa-miR-23a-3p/hsa-miR-23b-3p
IFFO1	0.114979	0.438573	0.306818	2	hsa-miR-103a-3p/hsa-miR-107	hsa-miR-29b-3p
IKBKB	0.114979	0.438573	0.306818	2	hsa-miR-15b-5p/hsa-miR-15b-5p	hsa-miR-199a-5p
ITGA3	0.114979	0.438573	0.306818	2	hsa-miR-181c-5p	hsa-miR-199a-5p
ITGA4	0.114979	0.438573	0.306818	2	hsa-miR-199a-5p	hsa-miR-301a-3p
KCNC1	0.114979	0.438573	0.306818	2	hsa-let-7a-5p/hsa-let-7e-5p/hsa-let-7f-5p/hsa-let-7g-5p/hsa-miR-98-5p	hsa-miR-143-3p
KIAA0753	0.114979	0.438573	0.306818	2	hsa-miR-199a-5p	hsa-miR-23a-3p/hsa-miR-23b-3p
KIAA1328	0.114979	0.438573	0.306818	2	hsa-miR-142-5p	hsa-miR-15b-5p/hsa-miR-15b-5p
KIAA1919	0.114979	0.438573	0.306818	2	hsa-let-7a-5p/hsa-let-7e-5p/hsa-let-7f-5p/hsa-let-7g-5p/hsa-miR-98-5p	hsa-miR-532-5p
LARGE	0.114979	0.438573	0.306818	2	hsa-miR-132-3p/hsa-miR-212-3p	hsa-miR-199a-5p
LRRC8D	0.114979	0.438573	0.306818	2	hsa-miR-103a-3p/hsa-miR-107	hsa-miR-181c-5p
LUZP6	0.114979	0.438573	0.306818	2	hsa-miR-200a-3p	hsa-miR-26a-5p/hsa-miR-26b-5p
LYPLA1	0.114979	0.438573	0.306818	2	hsa-miR-200a-3p	hsa-miR-23a-3p/hsa-miR-23b-3p
MAB21L2	0.114979	0.438573	0.306818	2	hsa-miR-181c-5p	hsa-miR-23a-3p/hsa-miR-23b-3p
MADD	0.114979	0.438573	0.306818	2	hsa-miR-181c-5p	hsa-miR-23a-3p/hsa-miR-23b-3p
MAF1	0.114979	0.438573	0.306818	2	hsa-miR-103a-3p/hsa-miR-107	hsa-miR-148a-3p
MED20	0.114979	0.438573	0.306818	2	hsa-miR-15b-5p/hsa-miR-15b-5p	hsa-miR-200a-3p
MFN2	0.114979	0.438573	0.306818	2	hsa-miR-103a-3p/hsa-miR-107	hsa-miR-15b-5p/hsa-miR-15b-5p
MON1B	0.114979	0.438573	0.306818	2	hsa-miR-15b-5p/hsa-miR-15b-5p	hsa-miR-199a-5p
MORC4	0.114979	0.438573	0.306818	2	hsa-miR-23a-3p/hsa-miR-23b-3p	hsa-miR-338-3p
MPP7	0.114979	0.438573	0.306818	2	hsa-miR-181c-5p	hsa-miR-532-5p
MPZL3	0.114979	0.438573	0.306818	2	hsa-miR-22-3p	hsa-miR-29b-3p
NCKAP5L	0.114979	0.438573	0.306818	2	hsa-miR-133b	hsa-miR-29b-3p
NCMAP	0.114979	0.438573	0.306818	2	hsa-miR-22-3p	hsa-miR-29b-3p
NDRG2	0.114979	0.438573	0.306818	2	hsa-miR-181c-5p	hsa-miR-301a-3p
NHSL1	0.114979	0.438573	0.306818	2	hsa-miR-26a-5p/hsa-miR-26b-5p	hsa-miR-301a-3p
NME1	0.114979	0.438573	0.306818	2	hsa-miR-181c-5p	hsa-miR-200a-3p
NNT	0.114979	0.438573	0.306818	2	hsa-let-7a-5p/hsa-let-7e-5p/hsa-let-7f-5p/hsa-let-7g-5p/hsa-miR-98-5p	hsa-miR-338-3p
NR2F6	0.114979	0.438573	0.306818	2	hsa-miR-27a-3p	hsa-miR-433-3p
NUDT10	0.114979	0.438573	0.306818	2	hsa-miR-23a-3p/hsa-miR-23b-3p	hsa-miR-301a-3p
ORMDL2	0.114979	0.438573	0.306818	2	hsa-miR-22-3p	hsa-miR-532-5p
OSMR	0.114979	0.438573	0.306818	2	hsa-let-7a-5p/hsa-let-7e-5p/hsa-let-7f-5p/hsa-let-7g-5p/hsa-miR-98-5p	hsa-miR-193a-3p/hsa-miR-193b-3p
PALM	0.114979	0.438573	0.306818	2	hsa-miR-22-3p	hsa-miR-29b-3p
PDLIM2	0.114979	0.438573	0.306818	2	hsa-miR-27a-3p	hsa-miR-342-3p
PIGU	0.114979	0.438573	0.306818	2	hsa-let-7a-5p/hsa-let-7e-5p/hsa-let-7f-5p/hsa-let-7g-5p/hsa-miR-98-5p	hsa-miR-26a-5p/hsa-miR-26b-5p
PIP5K1B	0.114979	0.438573	0.306818	2	hsa-miR-142-5p	hsa-miR-27a-3p
PPP4R1	0.114979	0.438573	0.306818	2	hsa-miR-26a-5p/hsa-miR-26b-5p	hsa-miR-338-3p
PRDM15	0.114979	0.438573	0.306818	2	hsa-miR-148a-3p	hsa-miR-338-3p
PRKAG2	0.114979	0.438573	0.306818	2	hsa-miR-148a-3p	hsa-miR-26a-5p/hsa-miR-26b-5p
PRMT8	0.114979	0.438573	0.306818	2	hsa-miR-103a-3p/hsa-miR-107	hsa-miR-27a-3p
PSAP	0.114979	0.438573	0.306818	2	hsa-miR-181c-5p	hsa-miR-301a-3p
PTGES3	0.114979	0.438573	0.306818	2	hsa-miR-148a-3p	hsa-miR-301a-3p
PTGS2	0.114979	0.438573	0.306818	2	hsa-miR-143-3p	hsa-miR-26a-5p/hsa-miR-26b-5p
R3HDM1	0.114979	0.438573	0.306818	2	hsa-miR-199a-5p	hsa-miR-301a-3p
RAG1	0.114979	0.438573	0.306818	2	hsa-let-7a-5p/hsa-let-7e-5p/hsa-let-7f-5p/hsa-let-7g-5p/hsa-miR-98-5p	hsa-miR-200a-3p
RALGAPA1	0.114979	0.438573	0.306818	2	hsa-miR-199a-5p	hsa-miR-221-3p
RCBTB1	0.114979	0.438573	0.306818	2	hsa-miR-26a-5p/hsa-miR-26b-5p	hsa-miR-27a-3p
RFESD	0.114979	0.438573	0.306818	2	hsa-miR-199a-5p	hsa-miR-29b-3p
RNF7	0.114979	0.438573	0.306818	2	hsa-let-7a-5p/hsa-let-7e-5p/hsa-let-7f-5p/hsa-let-7g-5p/hsa-miR-98-5p	hsa-miR-23a-3p/hsa-miR-23b-3p
RPH3AL	0.114979	0.438573	0.306818	2	hsa-miR-200a-3p	hsa-miR-22-3p
RUFY3	0.114979	0.438573	0.306818	2	hsa-let-7a-5p/hsa-let-7e-5p/hsa-let-7f-5p/hsa-let-7g-5p/hsa-miR-98-5p	hsa-miR-27a-3p
SEC24C	0.114979	0.438573	0.306818	2	hsa-miR-181c-5p	hsa-miR-199a-5p
SEH1L	0.114979	0.438573	0.306818	2	hsa-miR-15b-5p/hsa-miR-15b-5p	hsa-miR-23a-3p/hsa-miR-23b-3p
SEMA5B	0.114979	0.438573	0.306818	2	hsa-miR-15b-5p/hsa-miR-15b-5p	hsa-miR-29b-3p
SEPSECS	0.114979	0.438573	0.306818	2	hsa-miR-23a-3p/hsa-miR-23b-3p	hsa-miR-338-3p
SEPT4	0.114979	0.438573	0.306818	2	hsa-miR-27a-3p	hsa-miR-338-3p
SF3B1	0.114979	0.438573	0.306818	2	hsa-miR-133b	hsa-miR-193a-3p/hsa-miR-193b-3p
SH2D2A	0.114979	0.438573	0.306818	2	hsa-miR-103a-3p/hsa-miR-107	hsa-miR-15b-5p/hsa-miR-15b-5p
SLC22A7	0.114979	0.438573	0.306818	2	hsa-miR-143-3p	hsa-miR-29b-3p
SLC35E4	0.114979	0.438573	0.306818	2	hsa-miR-199a-5p	hsa-miR-22-3p
SLC6A14	0.114979	0.438573	0.306818	2	hsa-miR-23a-3p/hsa-miR-23b-3p	hsa-miR-29b-3p
SLC6A2	0.114979	0.438573	0.306818	2	hsa-miR-181c-5p	hsa-miR-23a-3p/hsa-miR-23b-3p
SPHAR	0.114979	0.438573	0.306818	2	hsa-miR-27a-3p	hsa-miR-338-3p
SPOCK3	0.114979	0.438573	0.306818	2	hsa-miR-15b-5p/hsa-miR-15b-5p	hsa-miR-338-3p
SRM	0.114979	0.438573	0.306818	2	hsa-miR-103a-3p/hsa-miR-107	hsa-miR-200a-3p
STRIP1	0.114979	0.438573	0.306818	2	hsa-miR-103a-3p/hsa-miR-107	hsa-miR-143-3p
SYNDIG1	0.114979	0.438573	0.306818	2	hsa-miR-103a-3p/hsa-miR-107	hsa-miR-15b-5p/hsa-miR-15b-5p
THRAP3	0.114979	0.438573	0.306818	2	hsa-miR-133b	hsa-miR-26a-5p/hsa-miR-26b-5p
THY1	0.114979	0.438573	0.306818	2	hsa-miR-103a-3p/hsa-miR-107	hsa-miR-143-3p
TMED4	0.114979	0.438573	0.306818	2	hsa-miR-181c-5p	hsa-miR-22-3p
TMEM158	0.114979	0.438573	0.306818	2	hsa-miR-133b	hsa-miR-142-5p
TMEM234	0.114979	0.438573	0.306818	2	hsa-let-7a-5p/hsa-let-7e-5p/hsa-let-7f-5p/hsa-let-7g-5p/hsa-miR-98-5p	hsa-miR-29b-3p
TRIP10	0.114979	0.438573	0.306818	2	hsa-miR-142-5p	hsa-miR-15b-5p/hsa-miR-15b-5p
TSPYL2	0.114979	0.438573	0.306818	2	hsa-miR-15b-5p/hsa-miR-15b-5p	hsa-miR-301a-3p
TTC13	0.114979	0.438573	0.306818	2	hsa-miR-26a-5p/hsa-miR-26b-5p	hsa-miR-433-3p
TTYH2	0.114979	0.438573	0.306818	2	hsa-miR-200a-3p	hsa-miR-29b-3p
UBD	0.114979	0.438573	0.306818	2	hsa-miR-193a-3p/hsa-miR-193b-3p	hsa-miR-22-3p
USP12	0.114979	0.438573	0.306818	2	hsa-let-7a-5p/hsa-let-7e-5p/hsa-let-7f-5p/hsa-let-7g-5p/hsa-miR-98-5p	hsa-miR-15b-5p/hsa-miR-15b-5p
VSTM5	0.114979	0.438573	0.306818	2	hsa-let-7a-5p/hsa-let-7e-5p/hsa-let-7f-5p/hsa-let-7g-5p/hsa-miR-98-5p	hsa-miR-27a-3p
WDR20	0.114979	0.438573	0.306818	2	hsa-miR-148a-3p	hsa-miR-301a-3p
WDR81	0.114979	0.438573	0.306818	2	hsa-miR-200a-3p	hsa-miR-29b-3p
WIF1	0.114979	0.438573	0.306818	2	hsa-miR-15b-5p/hsa-miR-15b-5p	hsa-miR-181c-5p
YBX3	0.114979	0.438573	0.306818	2	hsa-miR-29b-3p	hsa-miR-338-3p
YIPF2	0.114979	0.438573	0.306818	2	hsa-miR-199a-5p	hsa-miR-342-3p
YPEL3	0.114979	0.438573	0.306818	2	hsa-miR-148a-3p	hsa-miR-27a-3p
YTHDC2	0.114979	0.438573	0.306818	2	hsa-miR-148a-3p	hsa-miR-181c-5p
ZFP1	0.114979	0.438573	0.306818	2	hsa-miR-181c-5p	hsa-miR-27a-3p
ZNF200	0.114979	0.438573	0.306818	2	hsa-let-7a-5p/hsa-let-7e-5p/hsa-let-7f-5p/hsa-let-7g-5p/hsa-miR-98-5p	hsa-miR-181c-5p
ZNF225	0.114979	0.438573	0.306818	2	hsa-miR-199a-5p	hsa-miR-23a-3p/hsa-miR-23b-3p
ZNF248	0.114979	0.438573	0.306818	2	hsa-miR-193a-3p/hsa-miR-193b-3p	hsa-miR-532-5p
ZNF354B	0.114979	0.438573	0.306818	2	hsa-let-7a-5p/hsa-let-7e-5p/hsa-let-7f-5p/hsa-let-7g-5p/hsa-miR-98-5p	hsa-miR-133b
ZNF536	0.114979	0.438573	0.306818	2	hsa-miR-181c-5p	hsa-miR-532-5p
ZNF783	0.114979	0.438573	0.306818	2	hsa-let-7a-5p/hsa-let-7e-5p/hsa-let-7f-5p/hsa-let-7g-5p/hsa-miR-98-5p	hsa-miR-27a-3p
ACACB	0.115944	0.438573	0.490909	4	hsa-miR-103a-3p/hsa-miR-107	hsa-miR-15b-5p/hsa-miR-15b-5p	hsa-miR-338-3p	hsa-miR-502-3p
ACVR1	0.115944	0.438573	0.490909	4	hsa-miR-132-3p/hsa-miR-212-3p	hsa-miR-148a-3p	hsa-miR-27a-3p	hsa-miR-301a-3p
AP4E1	0.115944	0.438573	0.490909	4	hsa-miR-133b	hsa-miR-148a-3p	hsa-miR-29b-3p	hsa-miR-338-3p
ARL5A	0.115944	0.438573	0.490909	4	hsa-let-7a-5p/hsa-let-7e-5p/hsa-let-7f-5p/hsa-let-7g-5p/hsa-miR-98-5p	hsa-miR-181c-5p	hsa-miR-200a-3p	hsa-miR-338-3p
BBC3	0.115944	0.438573	0.490909	4	hsa-miR-143-3p	hsa-miR-221-3p	hsa-miR-27a-3p	hsa-miR-29b-3p
BCL2L13	0.115944	0.438573	0.490909	4	hsa-miR-103a-3p/hsa-miR-107	hsa-miR-148a-3p	hsa-miR-200a-3p	hsa-miR-27a-3p
CAST	0.115944	0.438573	0.490909	4	hsa-miR-142-5p	hsa-miR-148a-3p	hsa-miR-15b-5p/hsa-miR-15b-5p	hsa-miR-301a-3p
CC2D1B	0.115944	0.438573	0.490909	4	hsa-miR-103a-3p/hsa-miR-107	hsa-miR-132-3p/hsa-miR-212-3p	hsa-miR-15b-5p/hsa-miR-15b-5p	hsa-miR-301a-3p
CCNG1	0.115944	0.438573	0.490909	4	hsa-miR-181c-5p	hsa-miR-23a-3p/hsa-miR-23b-3p	hsa-miR-27a-3p	hsa-miR-532-5p
CCNYL1	0.115944	0.438573	0.490909	4	hsa-miR-103a-3p/hsa-miR-107	hsa-miR-15b-5p/hsa-miR-15b-5p	hsa-miR-27a-3p	hsa-miR-29b-3p
CHL1	0.115944	0.438573	0.490909	4	hsa-miR-23a-3p/hsa-miR-23b-3p	hsa-miR-338-3p	hsa-miR-433-3p	hsa-miR-532-5p
FOSB	0.115944	0.438573	0.490909	4	hsa-miR-148a-3p	hsa-miR-23a-3p/hsa-miR-23b-3p	hsa-miR-27a-3p	hsa-miR-342-3p
GALNT7	0.115944	0.438573	0.490909	4	hsa-miR-103a-3p/hsa-miR-107	hsa-miR-15b-5p/hsa-miR-15b-5p	hsa-miR-26a-5p/hsa-miR-26b-5p	hsa-miR-27a-3p
GAS7	0.115944	0.438573	0.490909	4	hsa-let-7a-5p/hsa-let-7e-5p/hsa-let-7f-5p/hsa-let-7g-5p/hsa-miR-98-5p	hsa-miR-142-5p	hsa-miR-181c-5p	hsa-miR-29b-3p
GPM6A	0.115944	0.438573	0.490909	4	hsa-miR-133b	hsa-miR-148a-3p	hsa-miR-154-3p	hsa-miR-221-3p
GREB1L	0.115944	0.438573	0.490909	4	hsa-let-7a-5p/hsa-let-7e-5p/hsa-let-7f-5p/hsa-let-7g-5p/hsa-miR-98-5p	hsa-miR-181c-5p	hsa-miR-200a-3p	hsa-miR-26a-5p/hsa-miR-26b-5p
HIP1	0.115944	0.438573	0.490909	4	hsa-let-7a-5p/hsa-let-7e-5p/hsa-let-7f-5p/hsa-let-7g-5p/hsa-miR-98-5p	hsa-miR-27a-3p	hsa-miR-29b-3p	hsa-miR-342-3p
HOXC8	0.115944	0.438573	0.490909	4	hsa-miR-148a-3p	hsa-miR-15b-5p/hsa-miR-15b-5p	hsa-miR-181c-5p	hsa-miR-301a-3p
INSR	0.115944	0.438573	0.490909	4	hsa-let-7a-5p/hsa-let-7e-5p/hsa-let-7f-5p/hsa-let-7g-5p/hsa-miR-98-5p	hsa-miR-133b	hsa-miR-15b-5p/hsa-miR-15b-5p	hsa-miR-27a-3p
KHDRBS2	0.115944	0.438573	0.490909	4	hsa-miR-132-3p/hsa-miR-212-3p	hsa-miR-200a-3p	hsa-miR-221-3p	hsa-miR-22-3p
NAV2	0.115944	0.438573	0.490909	4	hsa-miR-103a-3p/hsa-miR-107	hsa-miR-27a-3p	hsa-miR-29b-3p	hsa-miR-301a-3p
PAPPA2	0.115944	0.438573	0.490909	4	hsa-miR-103a-3p/hsa-miR-107	hsa-miR-142-5p	hsa-miR-15b-5p/hsa-miR-15b-5p	hsa-miR-27a-3p
PCYT1B	0.115944	0.438573	0.490909	4	hsa-let-7a-5p/hsa-let-7e-5p/hsa-let-7f-5p/hsa-let-7g-5p/hsa-miR-98-5p	hsa-miR-148a-3p	hsa-miR-29b-3p	hsa-miR-301a-3p
PDP2	0.115944	0.438573	0.490909	4	hsa-let-7a-5p/hsa-let-7e-5p/hsa-let-7f-5p/hsa-let-7g-5p/hsa-miR-98-5p	hsa-miR-27a-3p	hsa-miR-29b-3p	hsa-miR-433-3p
PDZD2	0.115944	0.438573	0.490909	4	hsa-miR-154-3p	hsa-miR-200a-3p	hsa-miR-502-3p	hsa-miR-532-5p
PREX1	0.115944	0.438573	0.490909	4	hsa-miR-133b	hsa-miR-142-5p	hsa-miR-148a-3p	hsa-miR-433-3p
PRPF4B	0.115944	0.438573	0.490909	4	hsa-miR-103a-3p/hsa-miR-107	hsa-miR-142-5p	hsa-miR-23a-3p/hsa-miR-23b-3p	hsa-miR-532-5p
PXMP4	0.115944	0.438573	0.490909	4	hsa-let-7a-5p/hsa-let-7e-5p/hsa-let-7f-5p/hsa-let-7g-5p/hsa-miR-98-5p	hsa-miR-143-3p	hsa-miR-29b-3p	hsa-miR-301a-3p
RAB14	0.115944	0.438573	0.490909	4	hsa-miR-148a-3p	hsa-miR-27a-3p	hsa-miR-301a-3p	hsa-miR-338-3p
RAB3GAP2	0.115944	0.438573	0.490909	4	hsa-let-7a-5p/hsa-let-7e-5p/hsa-let-7f-5p/hsa-let-7g-5p/hsa-miR-98-5p	hsa-miR-142-5p	hsa-miR-181c-5p	hsa-miR-221-3p
RASSF3	0.115944	0.438573	0.490909	4	hsa-miR-199a-5p	hsa-miR-26a-5p/hsa-miR-26b-5p	hsa-miR-27a-3p	hsa-miR-301a-3p
RBM23	0.115944	0.438573	0.490909	4	hsa-miR-133b	hsa-miR-15b-5p/hsa-miR-15b-5p	hsa-miR-199a-5p	hsa-miR-26a-5p/hsa-miR-26b-5p
RP11-192H23.4	0.115944	0.438573	0.490909	4	hsa-miR-103a-3p/hsa-miR-107	hsa-miR-15b-5p/hsa-miR-15b-5p	hsa-miR-27a-3p	hsa-miR-29b-3p
SCYL3	0.115944	0.438573	0.490909	4	hsa-let-7a-5p/hsa-let-7e-5p/hsa-let-7f-5p/hsa-let-7g-5p/hsa-miR-98-5p	hsa-miR-132-3p/hsa-miR-212-3p	hsa-miR-193a-3p/hsa-miR-193b-3p	hsa-miR-22-3p
SGSM2	0.115944	0.438573	0.490909	4	hsa-miR-103a-3p/hsa-miR-107	hsa-miR-127-3p	hsa-miR-15b-5p/hsa-miR-15b-5p	hsa-miR-22-3p
SGTB	0.115944	0.438573	0.490909	4	hsa-miR-133b	hsa-miR-142-5p	hsa-miR-181c-5p	hsa-miR-301a-3p
SH3D19	0.115944	0.438573	0.490909	4	hsa-miR-142-5p	hsa-miR-26a-5p/hsa-miR-26b-5p	hsa-miR-301a-3p	hsa-miR-338-3p
SNX11	0.115944	0.438573	0.490909	4	hsa-miR-103a-3p/hsa-miR-107	hsa-miR-15b-5p/hsa-miR-15b-5p	hsa-miR-27a-3p	hsa-miR-433-3p
SPOCK1	0.115944	0.438573	0.490909	4	hsa-miR-22-3p	hsa-miR-23a-3p/hsa-miR-23b-3p	hsa-miR-301a-3p	hsa-miR-502-3p
SUCO	0.115944	0.438573	0.490909	4	hsa-miR-15b-5p/hsa-miR-15b-5p	hsa-miR-199a-5p	hsa-miR-23a-3p/hsa-miR-23b-3p	hsa-miR-27a-3p
TADA2B	0.115944	0.438573	0.490909	4	hsa-miR-132-3p/hsa-miR-212-3p	hsa-miR-15b-5p/hsa-miR-15b-5p	hsa-miR-181c-5p	hsa-miR-29b-3p
TBX18	0.115944	0.438573	0.490909	4	hsa-miR-154-3p	hsa-miR-15b-5p/hsa-miR-15b-5p	hsa-miR-181c-5p	hsa-miR-342-3p
TMEM127	0.115944	0.438573	0.490909	4	hsa-miR-143-3p	hsa-miR-148a-3p	hsa-miR-181c-5p	hsa-miR-29b-3p
TMEM151B	0.115944	0.438573	0.490909	4	hsa-miR-181c-5p	hsa-miR-29b-3p	hsa-miR-301a-3p	hsa-miR-502-3p
VGLL2	0.115944	0.438573	0.490909	4	hsa-miR-199a-5p	hsa-miR-23a-3p/hsa-miR-23b-3p	hsa-miR-27a-3p	hsa-miR-301a-3p
WIPI2	0.115944	0.438573	0.490909	4	hsa-let-7a-5p/hsa-let-7e-5p/hsa-let-7f-5p/hsa-let-7g-5p/hsa-miR-98-5p	hsa-miR-133b	hsa-miR-15b-5p/hsa-miR-15b-5p	hsa-miR-199a-5p
ZNF217	0.115944	0.438573	0.490909	4	hsa-miR-133b	hsa-miR-148a-3p	hsa-miR-26a-5p/hsa-miR-26b-5p	hsa-miR-301a-3p
NFAT5	0.121616	0.438573	0.699545	10	hsa-miR-103a-3p/hsa-miR-107	hsa-miR-132-3p/hsa-miR-212-3p	hsa-miR-133b	hsa-miR-142-5p	hsa-miR-148a-3p	hsa-miR-181c-5p	hsa-miR-221-3p	hsa-miR-22-3p	hsa-miR-27a-3p	hsa-miR-29b-3p
CASK	0.121771	0.438573	0.593182	6	hsa-let-7a-5p/hsa-let-7e-5p/hsa-let-7f-5p/hsa-let-7g-5p/hsa-miR-98-5p	hsa-miR-103a-3p/hsa-miR-107	hsa-miR-142-5p	hsa-miR-15b-5p/hsa-miR-15b-5p	hsa-miR-191-5p	hsa-miR-23a-3p/hsa-miR-23b-3p
CCDC171	0.121771	0.438573	0.593182	6	hsa-miR-103a-3p/hsa-miR-107	hsa-miR-132-3p/hsa-miR-212-3p	hsa-miR-221-3p	hsa-miR-23a-3p/hsa-miR-23b-3p	hsa-miR-26a-5p/hsa-miR-26b-5p	hsa-miR-342-3p
DCAF7	0.121771	0.438573	0.593182	6	hsa-miR-15b-5p/hsa-miR-15b-5p	hsa-miR-193a-3p/hsa-miR-193b-3p	hsa-miR-221-3p	hsa-miR-26a-5p/hsa-miR-26b-5p	hsa-miR-27a-3p	hsa-miR-29b-3p
GPCPD1	0.121771	0.438573	0.593182	6	hsa-let-7a-5p/hsa-let-7e-5p/hsa-let-7f-5p/hsa-let-7g-5p/hsa-miR-98-5p	hsa-miR-103a-3p/hsa-miR-107	hsa-miR-148a-3p	hsa-miR-181c-5p	hsa-miR-29b-3p	hsa-miR-301a-3p
KLHL18	0.121771	0.438573	0.593182	6	hsa-miR-103a-3p/hsa-miR-107	hsa-miR-148a-3p	hsa-miR-15b-5p/hsa-miR-15b-5p	hsa-miR-221-3p	hsa-miR-26a-5p/hsa-miR-26b-5p	hsa-miR-342-3p
MAPK6	0.121771	0.438573	0.593182	6	hsa-let-7a-5p/hsa-let-7e-5p/hsa-let-7f-5p/hsa-let-7g-5p/hsa-miR-98-5p	hsa-miR-142-5p	hsa-miR-200a-3p	hsa-miR-26a-5p/hsa-miR-26b-5p	hsa-miR-301a-3p	hsa-miR-433-3p
MKL2	0.121771	0.438573	0.593182	6	hsa-miR-133b	hsa-miR-142-5p	hsa-miR-143-3p	hsa-miR-199a-5p	hsa-miR-26a-5p/hsa-miR-26b-5p	hsa-miR-532-5p
RAD51L3-RFFL	0.121771	0.438573	0.593182	6	hsa-miR-133b	hsa-miR-142-5p	hsa-miR-15b-5p/hsa-miR-15b-5p	hsa-miR-193a-3p/hsa-miR-193b-3p	hsa-miR-199a-5p	hsa-miR-23a-3p/hsa-miR-23b-3p
RFFL	0.121771	0.438573	0.593182	6	hsa-miR-133b	hsa-miR-142-5p	hsa-miR-15b-5p/hsa-miR-15b-5p	hsa-miR-193a-3p/hsa-miR-193b-3p	hsa-miR-199a-5p	hsa-miR-23a-3p/hsa-miR-23b-3p
SCN2A	0.121771	0.438573	0.593182	6	hsa-miR-103a-3p/hsa-miR-107	hsa-miR-132-3p/hsa-miR-212-3p	hsa-miR-142-5p	hsa-miR-15b-5p/hsa-miR-15b-5p	hsa-miR-23a-3p/hsa-miR-23b-3p	hsa-miR-502-3p
SEPT11	0.121771	0.438573	0.593182	6	hsa-miR-143-3p	hsa-miR-15b-5p/hsa-miR-15b-5p	hsa-miR-181c-5p	hsa-miR-23a-3p/hsa-miR-23b-3p	hsa-miR-27a-3p	hsa-miR-342-3p
SNAP25	0.121771	0.438573	0.593182	6	hsa-miR-15b-5p/hsa-miR-15b-5p	hsa-miR-181c-5p	hsa-miR-200a-3p	hsa-miR-27a-3p	hsa-miR-301a-3p	hsa-miR-342-3p
FRS2	0.124833	0.445889	0.681818	9	hsa-let-7a-5p/hsa-let-7e-5p/hsa-let-7f-5p/hsa-let-7g-5p/hsa-miR-98-5p	hsa-miR-133b	hsa-miR-143-3p	hsa-miR-15b-5p/hsa-miR-15b-5p	hsa-miR-181c-5p	hsa-miR-221-3p	hsa-miR-29b-3p	hsa-miR-338-3p	hsa-miR-532-5p
CACUL1	0.125734	0.448482	0.631169	7	hsa-miR-133b	hsa-miR-15b-5p/hsa-miR-15b-5p	hsa-miR-199a-5p	hsa-miR-22-3p	hsa-miR-23a-3p/hsa-miR-23b-3p	hsa-miR-29b-3p	hsa-miR-433-3p
FUBP1	0.125734	0.448482	0.631169	7	hsa-miR-103a-3p/hsa-miR-107	hsa-miR-148a-3p	hsa-miR-15b-5p/hsa-miR-15b-5p	hsa-miR-193a-3p/hsa-miR-193b-3p	hsa-miR-26a-5p/hsa-miR-26b-5p	hsa-miR-27a-3p	hsa-miR-301a-3p
THRA	0.125734	0.448482	0.631169	7	hsa-let-7a-5p/hsa-let-7e-5p/hsa-let-7f-5p/hsa-let-7g-5p/hsa-miR-98-5p	hsa-miR-103a-3p/hsa-miR-107	hsa-miR-143-3p	hsa-miR-181c-5p	hsa-miR-22-3p	hsa-miR-29b-3p	hsa-miR-301a-3p
MSL2	0.126413	0.450484	0.659659	8	hsa-miR-142-5p	hsa-miR-181c-5p	hsa-miR-221-3p	hsa-miR-22-3p	hsa-miR-23a-3p/hsa-miR-23b-3p	hsa-miR-27a-3p	hsa-miR-338-3p	hsa-miR-433-3p
ZFHX3	0.126413	0.450484	0.659659	8	hsa-miR-148a-3p	hsa-miR-15b-5p/hsa-miR-15b-5p	hsa-miR-181c-5p	hsa-miR-221-3p	hsa-miR-23a-3p/hsa-miR-23b-3p	hsa-miR-26a-5p/hsa-miR-26b-5p	hsa-miR-27a-3p	hsa-miR-532-5p
DCP1A	0.131625	0.46406	0.564545	5	hsa-miR-103a-3p/hsa-miR-107	hsa-miR-133b	hsa-miR-148a-3p	hsa-miR-15b-5p/hsa-miR-15b-5p	hsa-miR-27a-3p
DMXL1	0.131625	0.46406	0.564545	5	hsa-miR-133b	hsa-miR-148a-3p	hsa-miR-200a-3p	hsa-miR-23a-3p/hsa-miR-23b-3p	hsa-miR-26a-5p/hsa-miR-26b-5p
FBXO32	0.131625	0.46406	0.564545	5	hsa-let-7a-5p/hsa-let-7e-5p/hsa-let-7f-5p/hsa-let-7g-5p/hsa-miR-98-5p	hsa-miR-23a-3p/hsa-miR-23b-3p	hsa-miR-27a-3p	hsa-miR-338-3p	hsa-miR-342-3p
GPR75	0.131625	0.46406	0.564545	5	hsa-miR-142-5p	hsa-miR-200a-3p	hsa-miR-23a-3p/hsa-miR-23b-3p	hsa-miR-27a-3p	hsa-miR-342-3p
KCNH1	0.131625	0.46406	0.564545	5	hsa-miR-103a-3p/hsa-miR-107	hsa-miR-148a-3p	hsa-miR-181c-5p	hsa-miR-22-3p	hsa-miR-23a-3p/hsa-miR-23b-3p
LRIG2	0.131625	0.46406	0.564545	5	hsa-let-7a-5p/hsa-let-7e-5p/hsa-let-7f-5p/hsa-let-7g-5p/hsa-miR-98-5p	hsa-miR-103a-3p/hsa-miR-107	hsa-miR-15b-5p/hsa-miR-15b-5p	hsa-miR-181c-5p	hsa-miR-23a-3p/hsa-miR-23b-3p
MAPK10	0.131625	0.46406	0.564545	5	hsa-miR-193a-3p/hsa-miR-193b-3p	hsa-miR-221-3p	hsa-miR-22-3p	hsa-miR-27a-3p	hsa-miR-29b-3p
MBD2	0.131625	0.46406	0.564545	5	hsa-let-7a-5p/hsa-let-7e-5p/hsa-let-7f-5p/hsa-let-7g-5p/hsa-miR-98-5p	hsa-miR-142-5p	hsa-miR-181c-5p	hsa-miR-221-3p	hsa-miR-301a-3p
MYH9	0.131625	0.46406	0.564545	5	hsa-miR-103a-3p/hsa-miR-107	hsa-miR-133b	hsa-miR-199a-5p	hsa-miR-433-3p	hsa-miR-532-5p
NKAP	0.131625	0.46406	0.564545	5	hsa-let-7a-5p/hsa-let-7e-5p/hsa-let-7f-5p/hsa-let-7g-5p/hsa-miR-98-5p	hsa-miR-181c-5p	hsa-miR-23a-3p/hsa-miR-23b-3p	hsa-miR-342-3p	hsa-miR-532-5p
NRP2	0.131625	0.46406	0.564545	5	hsa-miR-15b-5p/hsa-miR-15b-5p	hsa-miR-200a-3p	hsa-miR-23a-3p/hsa-miR-23b-3p	hsa-miR-27a-3p	hsa-miR-532-5p
OTUD3	0.131625	0.46406	0.564545	5	hsa-let-7a-5p/hsa-let-7e-5p/hsa-let-7f-5p/hsa-let-7g-5p/hsa-miR-98-5p	hsa-miR-132-3p/hsa-miR-212-3p	hsa-miR-142-5p	hsa-miR-200a-3p	hsa-miR-301a-3p
SUGT1	0.131625	0.46406	0.564545	5	hsa-miR-148a-3p	hsa-miR-181c-5p	hsa-miR-200a-3p	hsa-miR-221-3p	hsa-miR-301a-3p
TMEM110	0.131625	0.46406	0.564545	5	hsa-let-7a-5p/hsa-let-7e-5p/hsa-let-7f-5p/hsa-let-7g-5p/hsa-miR-98-5p	hsa-miR-133b	hsa-miR-200a-3p	hsa-miR-27a-3p	hsa-miR-301a-3p
TMEM248	0.131625	0.46406	0.564545	5	hsa-miR-154-3p	hsa-miR-15b-5p/hsa-miR-15b-5p	hsa-miR-26a-5p/hsa-miR-26b-5p	hsa-miR-27a-3p	hsa-miR-502-3p
TRAM2	0.131625	0.46406	0.564545	5	hsa-miR-133b	hsa-miR-143-3p	hsa-miR-200a-3p	hsa-miR-221-3p	hsa-miR-29b-3p
TTLL7	0.131625	0.46406	0.564545	5	hsa-miR-103a-3p/hsa-miR-107	hsa-miR-181c-5p	hsa-miR-200a-3p	hsa-miR-23a-3p/hsa-miR-23b-3p	hsa-miR-433-3p
USP9X	0.131625	0.46406	0.564545	5	hsa-miR-132-3p/hsa-miR-212-3p	hsa-miR-142-5p	hsa-miR-181c-5p	hsa-miR-200a-3p	hsa-miR-26a-5p/hsa-miR-26b-5p
VANGL1	0.131625	0.46406	0.564545	5	hsa-miR-142-5p	hsa-miR-181c-5p	hsa-miR-27a-3p	hsa-miR-29b-3p	hsa-miR-301a-3p
KCMF1	0.13424	0.46406	0.711818	10	hsa-let-7a-5p/hsa-let-7e-5p/hsa-let-7f-5p/hsa-let-7g-5p/hsa-miR-98-5p	hsa-miR-103a-3p/hsa-miR-107	hsa-miR-132-3p/hsa-miR-212-3p	hsa-miR-143-3p	hsa-miR-154-3p	hsa-miR-181c-5p	hsa-miR-26a-5p/hsa-miR-26b-5p	hsa-miR-27a-3p	hsa-miR-342-3p	hsa-miR-502-3p
RPS6KA3	0.138387	0.46406	0.695455	9	hsa-let-7a-5p/hsa-let-7e-5p/hsa-let-7f-5p/hsa-let-7g-5p/hsa-miR-98-5p	hsa-miR-103a-3p/hsa-miR-107	hsa-miR-142-5p	hsa-miR-15b-5p/hsa-miR-15b-5p	hsa-miR-181c-5p	hsa-miR-23a-3p/hsa-miR-23b-3p	hsa-miR-29b-3p	hsa-miR-301a-3p	hsa-miR-532-5p
ATXN7L3B	0.138839	0.46406	0.521591	4	hsa-let-7a-5p/hsa-let-7e-5p/hsa-let-7f-5p/hsa-let-7g-5p/hsa-miR-98-5p	hsa-miR-15b-5p/hsa-miR-15b-5p	hsa-miR-23a-3p/hsa-miR-23b-3p	hsa-miR-338-3p
BAMBI	0.138839	0.46406	0.521591	4	hsa-miR-133b	hsa-miR-142-5p	hsa-miR-338-3p	hsa-miR-433-3p
BCORL1	0.138839	0.46406	0.521591	4	hsa-miR-133b	hsa-miR-143-3p	hsa-miR-27a-3p	hsa-miR-29b-3p
CCDC117	0.138839	0.46406	0.521591	4	hsa-miR-132-3p/hsa-miR-212-3p	hsa-miR-133b	hsa-miR-181c-5p	hsa-miR-29b-3p
CEP128	0.138839	0.46406	0.521591	4	hsa-miR-133b	hsa-miR-142-5p	hsa-miR-23a-3p/hsa-miR-23b-3p	hsa-miR-27a-3p
CREBL2	0.138839	0.46406	0.521591	4	hsa-miR-143-3p	hsa-miR-15b-5p/hsa-miR-15b-5p	hsa-miR-181c-5p	hsa-miR-26a-5p/hsa-miR-26b-5p
CUL4B	0.138839	0.46406	0.521591	4	hsa-miR-133b	hsa-miR-142-5p	hsa-miR-154-3p	hsa-miR-200a-3p
DNAJB5	0.138839	0.46406	0.521591	4	hsa-miR-199a-5p	hsa-miR-22-3p	hsa-miR-23a-3p/hsa-miR-23b-3p	hsa-miR-26a-5p/hsa-miR-26b-5p
ERBB2IP	0.138839	0.46406	0.521591	4	hsa-miR-193a-3p/hsa-miR-193b-3p	hsa-miR-23a-3p/hsa-miR-23b-3p	hsa-miR-29b-3p	hsa-miR-301a-3p
ERC2	0.138839	0.46406	0.521591	4	hsa-miR-15b-5p/hsa-miR-15b-5p	hsa-miR-200a-3p	hsa-miR-26a-5p/hsa-miR-26b-5p	hsa-miR-27a-3p
FAM13A	0.138839	0.46406	0.521591	4	hsa-miR-133b	hsa-miR-154-3p	hsa-miR-27a-3p	hsa-miR-301a-3p
FAM179A	0.138839	0.46406	0.521591	4	hsa-miR-142-5p	hsa-miR-193a-3p/hsa-miR-193b-3p	hsa-miR-199a-5p	hsa-miR-433-3p
FGD4	0.138839	0.46406	0.521591	4	hsa-miR-142-5p	hsa-miR-181c-5p	hsa-miR-23a-3p/hsa-miR-23b-3p	hsa-miR-29b-3p
FGF14	0.138839	0.46406	0.521591	4	hsa-miR-221-3p	hsa-miR-23a-3p/hsa-miR-23b-3p	hsa-miR-27a-3p	hsa-miR-532-5p
GPR63	0.138839	0.46406	0.521591	4	hsa-let-7a-5p/hsa-let-7e-5p/hsa-let-7f-5p/hsa-let-7g-5p/hsa-miR-98-5p	hsa-miR-15b-5p/hsa-miR-15b-5p	hsa-miR-199a-5p	hsa-miR-200a-3p
HTR2C	0.138839	0.46406	0.521591	4	hsa-miR-143-3p	hsa-miR-181c-5p	hsa-miR-23a-3p/hsa-miR-23b-3p	hsa-miR-26a-5p/hsa-miR-26b-5p
IPO9	0.138839	0.46406	0.521591	4	hsa-let-7a-5p/hsa-let-7e-5p/hsa-let-7f-5p/hsa-let-7g-5p/hsa-miR-98-5p	hsa-miR-15b-5p/hsa-miR-15b-5p	hsa-miR-338-3p	hsa-miR-342-3p
IPPK	0.138839	0.46406	0.521591	4	hsa-miR-15b-5p/hsa-miR-15b-5p	hsa-miR-181c-5p	hsa-miR-23a-3p/hsa-miR-23b-3p	hsa-miR-26a-5p/hsa-miR-26b-5p
IRF1	0.138839	0.46406	0.521591	4	hsa-miR-132-3p/hsa-miR-212-3p	hsa-miR-23a-3p/hsa-miR-23b-3p	hsa-miR-301a-3p	hsa-miR-342-3p
IRF2BPL	0.138839	0.46406	0.521591	4	hsa-miR-142-5p	hsa-miR-15b-5p/hsa-miR-15b-5p	hsa-miR-193a-3p/hsa-miR-193b-3p	hsa-miR-200a-3p
KDM6B	0.138839	0.46406	0.521591	4	hsa-miR-148a-3p	hsa-miR-22-3p	hsa-miR-29b-3p	hsa-miR-342-3p
LEPROTL1	0.138839	0.46406	0.521591	4	hsa-let-7a-5p/hsa-let-7e-5p/hsa-let-7f-5p/hsa-let-7g-5p/hsa-miR-98-5p	hsa-miR-133b	hsa-miR-148a-3p	hsa-miR-433-3p
LUC7L3	0.138839	0.46406	0.521591	4	hsa-let-7a-5p/hsa-let-7e-5p/hsa-let-7f-5p/hsa-let-7g-5p/hsa-miR-98-5p	hsa-miR-193a-3p/hsa-miR-193b-3p	hsa-miR-200a-3p	hsa-miR-221-3p
MAN2A1	0.138839	0.46406	0.521591	4	hsa-miR-181c-5p	hsa-miR-26a-5p/hsa-miR-26b-5p	hsa-miR-27a-3p	hsa-miR-338-3p
MAT2A	0.138839	0.46406	0.521591	4	hsa-miR-22-3p	hsa-miR-23a-3p/hsa-miR-23b-3p	hsa-miR-26a-5p/hsa-miR-26b-5p	hsa-miR-29b-3p
MBTPS2	0.138839	0.46406	0.521591	4	hsa-let-7a-5p/hsa-let-7e-5p/hsa-let-7f-5p/hsa-let-7g-5p/hsa-miR-98-5p	hsa-miR-15b-5p/hsa-miR-15b-5p	hsa-miR-181c-5p	hsa-miR-200a-3p
NKD1	0.138839	0.46406	0.521591	4	hsa-let-7a-5p/hsa-let-7e-5p/hsa-let-7f-5p/hsa-let-7g-5p/hsa-miR-98-5p	hsa-miR-133b	hsa-miR-15b-5p/hsa-miR-15b-5p	hsa-miR-532-5p
NPTN	0.138839	0.46406	0.521591	4	hsa-miR-148a-3p	hsa-miR-181c-5p	hsa-miR-27a-3p	hsa-miR-301a-3p
NRG1	0.138839	0.46406	0.521591	4	hsa-miR-142-5p	hsa-miR-143-3p	hsa-miR-221-3p	hsa-miR-27a-3p
PAIP2B	0.138839	0.46406	0.521591	4	hsa-miR-103a-3p/hsa-miR-107	hsa-miR-22-3p	hsa-miR-26a-5p/hsa-miR-26b-5p	hsa-miR-27a-3p
PAK4	0.138839	0.46406	0.521591	4	hsa-miR-181c-5p	hsa-miR-193a-3p/hsa-miR-193b-3p	hsa-miR-199a-5p	hsa-miR-433-3p
PHF3	0.138839	0.46406	0.521591	4	hsa-miR-148a-3p	hsa-miR-181c-5p	hsa-miR-26a-5p/hsa-miR-26b-5p	hsa-miR-301a-3p
RAB8B	0.138839	0.46406	0.521591	4	hsa-let-7a-5p/hsa-let-7e-5p/hsa-let-7f-5p/hsa-let-7g-5p/hsa-miR-98-5p	hsa-miR-142-5p	hsa-miR-181c-5p	hsa-miR-23a-3p/hsa-miR-23b-3p
SEMA4F	0.138839	0.46406	0.521591	4	hsa-let-7a-5p/hsa-let-7e-5p/hsa-let-7f-5p/hsa-let-7g-5p/hsa-miR-98-5p	hsa-miR-181c-5p	hsa-miR-22-3p	hsa-miR-27a-3p
SEMA4G	0.138839	0.46406	0.521591	4	hsa-let-7a-5p/hsa-let-7e-5p/hsa-let-7f-5p/hsa-let-7g-5p/hsa-miR-98-5p	hsa-miR-132-3p/hsa-miR-212-3p	hsa-miR-181c-5p	hsa-miR-502-3p
SLC38A2	0.138839	0.46406	0.521591	4	hsa-miR-143-3p	hsa-miR-181c-5p	hsa-miR-200a-3p	hsa-miR-26a-5p/hsa-miR-26b-5p
SLK	0.138839	0.46406	0.521591	4	hsa-let-7a-5p/hsa-let-7e-5p/hsa-let-7f-5p/hsa-let-7g-5p/hsa-miR-98-5p	hsa-miR-142-5p	hsa-miR-29b-3p	hsa-miR-338-3p
SPEN	0.138839	0.46406	0.521591	4	hsa-miR-142-5p	hsa-miR-15b-5p/hsa-miR-15b-5p	hsa-miR-29b-3p	hsa-miR-301a-3p
TMEM236	0.138839	0.46406	0.521591	4	hsa-miR-142-5p	hsa-miR-29b-3p	hsa-miR-301a-3p	hsa-miR-532-5p
TUB	0.138839	0.46406	0.521591	4	hsa-miR-143-3p	hsa-miR-181c-5p	hsa-miR-22-3p	hsa-miR-26a-5p/hsa-miR-26b-5p
USP8	0.138839	0.46406	0.521591	4	hsa-miR-132-3p/hsa-miR-212-3p	hsa-miR-181c-5p	hsa-miR-22-3p	hsa-miR-301a-3p
ADAM11	0.138908	0.46406	0.45	3	hsa-miR-181c-5p	hsa-miR-221-3p	hsa-miR-22-3p
ADAM22	0.138908	0.46406	0.45	3	hsa-miR-148a-3p	hsa-miR-221-3p	hsa-miR-532-5p
ADRBK2	0.138908	0.46406	0.45	3	hsa-let-7a-5p/hsa-let-7e-5p/hsa-let-7f-5p/hsa-let-7g-5p/hsa-miR-98-5p	hsa-miR-199a-5p	hsa-miR-338-3p
AFTPH	0.138908	0.46406	0.45	3	hsa-miR-133b	hsa-miR-181c-5p	hsa-miR-199a-5p
ATF6	0.138908	0.46406	0.45	3	hsa-miR-142-5p	hsa-miR-15b-5p/hsa-miR-15b-5p	hsa-miR-200a-3p
B4GALT1	0.138908	0.46406	0.45	3	hsa-miR-15b-5p/hsa-miR-15b-5p	hsa-miR-181c-5p	hsa-miR-26a-5p/hsa-miR-26b-5p
CDH8	0.138908	0.46406	0.45	3	hsa-miR-132-3p/hsa-miR-212-3p	hsa-miR-181c-5p	hsa-miR-199a-5p
CHD5	0.138908	0.46406	0.45	3	hsa-miR-15b-5p/hsa-miR-15b-5p	hsa-miR-26a-5p/hsa-miR-26b-5p	hsa-miR-301a-3p
CLPB	0.138908	0.46406	0.45	3	hsa-let-7a-5p/hsa-let-7e-5p/hsa-let-7f-5p/hsa-let-7g-5p/hsa-miR-98-5p	hsa-miR-15b-5p/hsa-miR-15b-5p	hsa-miR-22-3p
COL25A1	0.138908	0.46406	0.45	3	hsa-miR-133b	hsa-miR-143-3p	hsa-miR-29b-3p
COL8A1	0.138908	0.46406	0.45	3	hsa-miR-133b	hsa-miR-199a-5p	hsa-miR-29b-3p
CPSF2	0.138908	0.46406	0.45	3	hsa-miR-103a-3p/hsa-miR-107	hsa-miR-26a-5p/hsa-miR-26b-5p	hsa-miR-433-3p
DEK	0.138908	0.46406	0.45	3	hsa-miR-142-5p	hsa-miR-181c-5p	hsa-miR-200a-3p
DRAM1	0.138908	0.46406	0.45	3	hsa-miR-181c-5p	hsa-miR-199a-5p	hsa-miR-26a-5p/hsa-miR-26b-5p
DYRK1B	0.138908	0.46406	0.45	3	hsa-miR-143-3p	hsa-miR-148a-3p	hsa-miR-15b-5p/hsa-miR-15b-5p
EDC3	0.138908	0.46406	0.45	3	hsa-miR-22-3p	hsa-miR-29b-3p	hsa-miR-342-3p
ELOVL4	0.138908	0.46406	0.45	3	hsa-let-7a-5p/hsa-let-7e-5p/hsa-let-7f-5p/hsa-let-7g-5p/hsa-miR-98-5p	hsa-miR-29b-3p	hsa-miR-532-5p
ELP4	0.138908	0.46406	0.45	3	hsa-miR-142-5p	hsa-miR-181c-5p	hsa-miR-221-3p
FAM222A	0.138908	0.46406	0.45	3	hsa-miR-27a-3p	hsa-miR-301a-3p	hsa-miR-342-3p
FBRS	0.138908	0.46406	0.45	3	hsa-miR-200a-3p	hsa-miR-22-3p	hsa-miR-29b-3p
GGA1	0.138908	0.46406	0.45	3	hsa-miR-29b-3p	hsa-miR-301a-3p	hsa-miR-338-3p
GNPTG	0.138908	0.46406	0.45	3	hsa-miR-200a-3p	hsa-miR-301a-3p	hsa-miR-502-3p
GREB1	0.138908	0.46406	0.45	3	hsa-let-7a-5p/hsa-let-7e-5p/hsa-let-7f-5p/hsa-let-7g-5p/hsa-miR-98-5p	hsa-miR-26a-5p/hsa-miR-26b-5p	hsa-miR-532-5p
GRM7	0.138908	0.46406	0.45	3	hsa-miR-133b	hsa-miR-15b-5p/hsa-miR-15b-5p	hsa-miR-181c-5p
HOXD10	0.138908	0.46406	0.45	3	hsa-miR-103a-3p/hsa-miR-107	hsa-miR-23a-3p/hsa-miR-23b-3p	hsa-miR-502-3p
HS3ST3A1	0.138908	0.46406	0.45	3	hsa-miR-142-5p	hsa-miR-181c-5p	hsa-miR-26a-5p/hsa-miR-26b-5p
IQGAP2	0.138908	0.46406	0.45	3	hsa-miR-133b	hsa-miR-181c-5p	hsa-miR-301a-3p
ITGA5	0.138908	0.46406	0.45	3	hsa-miR-148a-3p	hsa-miR-26a-5p/hsa-miR-26b-5p	hsa-miR-27a-3p
KIAA0232	0.138908	0.46406	0.45	3	hsa-miR-103a-3p/hsa-miR-107	hsa-miR-133b	hsa-miR-148a-3p
KIAA1161	0.138908	0.46406	0.45	3	hsa-let-7a-5p/hsa-let-7e-5p/hsa-let-7f-5p/hsa-let-7g-5p/hsa-miR-98-5p	hsa-miR-143-3p	hsa-miR-342-3p
KIF1C	0.138908	0.46406	0.45	3	hsa-miR-15b-5p/hsa-miR-15b-5p	hsa-miR-200a-3p	hsa-miR-23a-3p/hsa-miR-23b-3p
KLHL29	0.138908	0.46406	0.45	3	hsa-miR-181c-5p	hsa-miR-199a-5p	hsa-miR-27a-3p
LGR4	0.138908	0.46406	0.45	3	hsa-let-7a-5p/hsa-let-7e-5p/hsa-let-7f-5p/hsa-let-7g-5p/hsa-miR-98-5p	hsa-miR-193a-3p/hsa-miR-193b-3p	hsa-miR-27a-3p
LRRC8A	0.138908	0.46406	0.45	3	hsa-miR-191-5p	hsa-miR-193a-3p/hsa-miR-193b-3p	hsa-miR-200a-3p
LZTS3	0.138908	0.46406	0.45	3	hsa-miR-132-3p/hsa-miR-212-3p	hsa-miR-133b	hsa-miR-27a-3p
M6PR	0.138908	0.46406	0.45	3	hsa-miR-15b-5p/hsa-miR-15b-5p	hsa-miR-199a-5p	hsa-miR-23a-3p/hsa-miR-23b-3p
MAP3K12	0.138908	0.46406	0.45	3	hsa-miR-22-3p	hsa-miR-27a-3p	hsa-miR-301a-3p
MDN1	0.138908	0.46406	0.45	3	hsa-miR-15b-5p/hsa-miR-15b-5p	hsa-miR-26a-5p/hsa-miR-26b-5p	hsa-miR-27a-3p
MKNK2	0.138908	0.46406	0.45	3	hsa-miR-181c-5p	hsa-miR-26a-5p/hsa-miR-26b-5p	hsa-miR-27a-3p
MLLT10	0.138908	0.46406	0.45	3	hsa-let-7a-5p/hsa-let-7e-5p/hsa-let-7f-5p/hsa-let-7g-5p/hsa-miR-98-5p	hsa-miR-148a-3p	hsa-miR-301a-3p
MRAS	0.138908	0.46406	0.45	3	hsa-miR-148a-3p	hsa-miR-15b-5p/hsa-miR-15b-5p	hsa-miR-26a-5p/hsa-miR-26b-5p
NCAM1	0.138908	0.46406	0.45	3	hsa-miR-148a-3p	hsa-miR-200a-3p	hsa-miR-27a-3p
NCKAP5	0.138908	0.46406	0.45	3	hsa-miR-200a-3p	hsa-miR-29b-3p	hsa-miR-301a-3p
NDRG4	0.138908	0.46406	0.45	3	hsa-miR-132-3p/hsa-miR-212-3p	hsa-miR-181c-5p	hsa-miR-23a-3p/hsa-miR-23b-3p
NECAP1	0.138908	0.46406	0.45	3	hsa-miR-143-3p	hsa-miR-22-3p	hsa-miR-27a-3p
NEK10	0.138908	0.46406	0.45	3	hsa-miR-103a-3p/hsa-miR-107	hsa-miR-15b-5p/hsa-miR-15b-5p	hsa-miR-26a-5p/hsa-miR-26b-5p
PDE4B	0.138908	0.46406	0.45	3	hsa-miR-148a-3p	hsa-miR-23a-3p/hsa-miR-23b-3p	hsa-miR-26a-5p/hsa-miR-26b-5p
PHYHIPL	0.138908	0.46406	0.45	3	hsa-miR-103a-3p/hsa-miR-107	hsa-miR-200a-3p	hsa-miR-23a-3p/hsa-miR-23b-3p
PPIG	0.138908	0.46406	0.45	3	hsa-miR-103a-3p/hsa-miR-107	hsa-miR-15b-5p/hsa-miR-15b-5p	hsa-miR-27a-3p
PTPRM	0.138908	0.46406	0.45	3	hsa-miR-148a-3p	hsa-miR-15b-5p/hsa-miR-15b-5p	hsa-miR-301a-3p
PXN	0.138908	0.46406	0.45	3	hsa-miR-132-3p/hsa-miR-212-3p	hsa-miR-199a-5p	hsa-miR-27a-3p
SCML4	0.138908	0.46406	0.45	3	hsa-miR-103a-3p/hsa-miR-107	hsa-miR-26a-5p/hsa-miR-26b-5p	hsa-miR-301a-3p
SERINC3	0.138908	0.46406	0.45	3	hsa-miR-23a-3p/hsa-miR-23b-3p	hsa-miR-27a-3p	hsa-miR-301a-3p
SERINC5	0.138908	0.46406	0.45	3	hsa-miR-23a-3p/hsa-miR-23b-3p	hsa-miR-29b-3p	hsa-miR-338-3p
SLC6A4	0.138908	0.46406	0.45	3	hsa-miR-15b-5p/hsa-miR-15b-5p	hsa-miR-27a-3p	hsa-miR-433-3p
SMAD3	0.138908	0.46406	0.45	3	hsa-miR-143-3p	hsa-miR-15b-5p/hsa-miR-15b-5p	hsa-miR-23a-3p/hsa-miR-23b-3p
SMAP1	0.138908	0.46406	0.45	3	hsa-miR-181c-5p	hsa-miR-22-3p	hsa-miR-26a-5p/hsa-miR-26b-5p
SNAP91	0.138908	0.46406	0.45	3	hsa-miR-148a-3p	hsa-miR-200a-3p	hsa-miR-22-3p
SPRY2	0.138908	0.46406	0.45	3	hsa-miR-103a-3p/hsa-miR-107	hsa-miR-23a-3p/hsa-miR-23b-3p	hsa-miR-27a-3p
SRPK1	0.138908	0.46406	0.45	3	hsa-miR-133b	hsa-miR-15b-5p/hsa-miR-15b-5p	hsa-miR-23a-3p/hsa-miR-23b-3p
SUN1	0.138908	0.46406	0.45	3	hsa-miR-142-5p	hsa-miR-199a-5p	hsa-miR-29b-3p
SYT6	0.138908	0.46406	0.45	3	hsa-miR-103a-3p/hsa-miR-107	hsa-miR-200a-3p	hsa-miR-301a-3p
TNFAIP1	0.138908	0.46406	0.45	3	hsa-miR-15b-5p/hsa-miR-15b-5p	hsa-miR-181c-5p	hsa-miR-29b-3p
TNS3	0.138908	0.46406	0.45	3	hsa-miR-143-3p	hsa-miR-181c-5p	hsa-miR-200a-3p
TRAK2	0.138908	0.46406	0.45	3	hsa-miR-148a-3p	hsa-miR-181c-5p	hsa-miR-29b-3p
TRIOBP	0.138908	0.46406	0.45	3	hsa-let-7a-5p/hsa-let-7e-5p/hsa-let-7f-5p/hsa-let-7g-5p/hsa-miR-98-5p	hsa-miR-142-5p	hsa-miR-23a-3p/hsa-miR-23b-3p
TRIP4	0.138908	0.46406	0.45	3	hsa-miR-181c-5p	hsa-miR-199a-5p	hsa-miR-27a-3p
UBE2QL1	0.138908	0.46406	0.45	3	hsa-miR-15b-5p/hsa-miR-15b-5p	hsa-miR-26a-5p/hsa-miR-26b-5p	hsa-miR-433-3p
USP44	0.138908	0.46406	0.45	3	hsa-let-7a-5p/hsa-let-7e-5p/hsa-let-7f-5p/hsa-let-7g-5p/hsa-miR-98-5p	hsa-miR-15b-5p/hsa-miR-15b-5p	hsa-miR-301a-3p
VSIG10	0.138908	0.46406	0.45	3	hsa-miR-148a-3p	hsa-miR-26a-5p/hsa-miR-26b-5p	hsa-miR-301a-3p
XPO7	0.138908	0.46406	0.45	3	hsa-miR-103a-3p/hsa-miR-107	hsa-miR-15b-5p/hsa-miR-15b-5p	hsa-miR-181c-5p
XRCC5	0.138908	0.46406	0.45	3	hsa-miR-23a-3p/hsa-miR-23b-3p	hsa-miR-342-3p	hsa-miR-532-5p
YWHAB	0.138908	0.46406	0.45	3	hsa-miR-148a-3p	hsa-miR-181c-5p	hsa-miR-27a-3p
ZFC3H1	0.138908	0.46406	0.45	3	hsa-miR-132-3p/hsa-miR-212-3p	hsa-miR-26a-5p/hsa-miR-26b-5p	hsa-miR-301a-3p
ZNF106	0.138908	0.46406	0.45	3	hsa-miR-22-3p	hsa-miR-26a-5p/hsa-miR-26b-5p	hsa-miR-27a-3p
AFF1	0.138988	0.46406	0.613636	6	hsa-miR-143-3p	hsa-miR-181c-5p	hsa-miR-200a-3p	hsa-miR-23a-3p/hsa-miR-23b-3p	hsa-miR-301a-3p	hsa-miR-342-3p
CTBP2	0.138988	0.46406	0.613636	6	hsa-miR-133b	hsa-miR-143-3p	hsa-miR-200a-3p	hsa-miR-338-3p	hsa-miR-342-3p	hsa-miR-532-5p
EXT1	0.138988	0.46406	0.613636	6	hsa-miR-181c-5p	hsa-miR-23a-3p/hsa-miR-23b-3p	hsa-miR-26a-5p/hsa-miR-26b-5p	hsa-miR-29b-3p	hsa-miR-338-3p	hsa-miR-342-3p
MYT1L	0.138988	0.46406	0.613636	6	hsa-miR-142-5p	hsa-miR-15b-5p/hsa-miR-15b-5p	hsa-miR-200a-3p	hsa-miR-221-3p	hsa-miR-301a-3p	hsa-miR-338-3p
RCOR1	0.138988	0.46406	0.613636	6	hsa-miR-181c-5p	hsa-miR-22-3p	hsa-miR-23a-3p/hsa-miR-23b-3p	hsa-miR-26a-5p/hsa-miR-26b-5p	hsa-miR-29b-3p	hsa-miR-532-5p
RNF217	0.138988	0.46406	0.613636	6	hsa-let-7a-5p/hsa-let-7e-5p/hsa-let-7f-5p/hsa-let-7g-5p/hsa-miR-98-5p	hsa-miR-142-5p	hsa-miR-15b-5p/hsa-miR-15b-5p	hsa-miR-181c-5p	hsa-miR-29b-3p	hsa-miR-338-3p
SLAIN2	0.138988	0.46406	0.613636	6	hsa-miR-103a-3p/hsa-miR-107	hsa-miR-132-3p/hsa-miR-212-3p	hsa-miR-142-5p	hsa-miR-181c-5p	hsa-miR-200a-3p	hsa-miR-221-3p
ULK2	0.138988	0.46406	0.613636	6	hsa-let-7a-5p/hsa-let-7e-5p/hsa-let-7f-5p/hsa-let-7g-5p/hsa-miR-98-5p	hsa-miR-200a-3p	hsa-miR-22-3p	hsa-miR-23a-3p/hsa-miR-23b-3p	hsa-miR-26a-5p/hsa-miR-26b-5p	hsa-miR-301a-3p
ATP2B2	0.141535	0.471949	0.648701	7	hsa-miR-127-3p	hsa-miR-15b-5p/hsa-miR-15b-5p	hsa-miR-181c-5p	hsa-miR-191-5p	hsa-miR-199a-5p	hsa-miR-29b-3p	hsa-miR-301a-3p
DCX	0.141535	0.471949	0.648701	7	hsa-let-7a-5p/hsa-let-7e-5p/hsa-let-7f-5p/hsa-let-7g-5p/hsa-miR-98-5p	hsa-miR-143-3p	hsa-miR-200a-3p	hsa-miR-221-3p	hsa-miR-27a-3p	hsa-miR-29b-3p	hsa-miR-342-3p
KCNK10	0.141535	0.471949	0.648701	7	hsa-miR-143-3p	hsa-miR-15b-5p/hsa-miR-15b-5p	hsa-miR-181c-5p	hsa-miR-22-3p	hsa-miR-29b-3p	hsa-miR-301a-3p	hsa-miR-532-5p
BCL9L	0.151972	0.495502	0.589091	5	hsa-miR-103a-3p/hsa-miR-107	hsa-miR-15b-5p/hsa-miR-15b-5p	hsa-miR-22-3p	hsa-miR-23a-3p/hsa-miR-23b-3p	hsa-miR-29b-3p
GPC4	0.151972	0.495502	0.589091	5	hsa-let-7a-5p/hsa-let-7e-5p/hsa-let-7f-5p/hsa-let-7g-5p/hsa-miR-98-5p	hsa-miR-23a-3p/hsa-miR-23b-3p	hsa-miR-26a-5p/hsa-miR-26b-5p	hsa-miR-342-3p	hsa-miR-532-5p
JAZF1	0.151972	0.495502	0.589091	5	hsa-miR-133b	hsa-miR-181c-5p	hsa-miR-23a-3p/hsa-miR-23b-3p	hsa-miR-27a-3p	hsa-miR-29b-3p
OGT	0.151972	0.495502	0.589091	5	hsa-miR-103a-3p/hsa-miR-107	hsa-miR-15b-5p/hsa-miR-15b-5p	hsa-miR-181c-5p	hsa-miR-200a-3p	hsa-miR-502-3p
PDE10A	0.151972	0.495502	0.589091	5	hsa-miR-133b	hsa-miR-154-3p	hsa-miR-181c-5p	hsa-miR-193a-3p/hsa-miR-193b-3p	hsa-miR-27a-3p
PRKCE	0.151972	0.495502	0.589091	5	hsa-miR-103a-3p/hsa-miR-107	hsa-miR-143-3p	hsa-miR-181c-5p	hsa-miR-200a-3p	hsa-miR-23a-3p/hsa-miR-23b-3p
SKP1	0.151972	0.495502	0.589091	5	hsa-miR-148a-3p	hsa-miR-193a-3p/hsa-miR-193b-3p	hsa-miR-221-3p	hsa-miR-301a-3p	hsa-miR-433-3p
SLC30A7	0.151972	0.495502	0.589091	5	hsa-let-7a-5p/hsa-let-7e-5p/hsa-let-7f-5p/hsa-let-7g-5p/hsa-miR-98-5p	hsa-miR-133b	hsa-miR-142-5p	hsa-miR-26a-5p/hsa-miR-26b-5p	hsa-miR-27a-3p
SLC35A3	0.151972	0.495502	0.589091	5	hsa-miR-103a-3p/hsa-miR-107	hsa-miR-181c-5p	hsa-miR-199a-5p	hsa-miR-26a-5p/hsa-miR-26b-5p	hsa-miR-27a-3p
TPM3	0.151972	0.495502	0.589091	5	hsa-miR-143-3p	hsa-miR-221-3p	hsa-miR-22-3p	hsa-miR-23a-3p/hsa-miR-23b-3p	hsa-miR-338-3p
UHRF1BP1L	0.151972	0.495502	0.589091	5	hsa-miR-142-5p	hsa-miR-23a-3p/hsa-miR-23b-3p	hsa-miR-26a-5p/hsa-miR-26b-5p	hsa-miR-29b-3p	hsa-miR-433-3p
HIPK3	0.1565	0.495502	0.690341	8	hsa-miR-148a-3p	hsa-miR-15b-5p/hsa-miR-15b-5p	hsa-miR-181c-5p	hsa-miR-200a-3p	hsa-miR-221-3p	hsa-miR-23a-3p/hsa-miR-23b-3p	hsa-miR-27a-3p	hsa-miR-301a-3p
ARMC8	0.157365	0.495502	0.634091	6	hsa-let-7a-5p/hsa-let-7e-5p/hsa-let-7f-5p/hsa-let-7g-5p/hsa-miR-98-5p	hsa-miR-103a-3p/hsa-miR-107	hsa-miR-142-5p	hsa-miR-15b-5p/hsa-miR-15b-5p	hsa-miR-27a-3p	hsa-miR-29b-3p
LONRF3	0.157365	0.495502	0.634091	6	hsa-let-7a-5p/hsa-let-7e-5p/hsa-let-7f-5p/hsa-let-7g-5p/hsa-miR-98-5p	hsa-miR-103a-3p/hsa-miR-107	hsa-miR-148a-3p	hsa-miR-15b-5p/hsa-miR-15b-5p	hsa-miR-23a-3p/hsa-miR-23b-3p	hsa-miR-301a-3p
MAP2K6	0.157365	0.495502	0.634091	6	hsa-miR-103a-3p/hsa-miR-107	hsa-miR-142-5p	hsa-miR-154-3p	hsa-miR-15b-5p/hsa-miR-15b-5p	hsa-miR-27a-3p	hsa-miR-29b-3p
MYCBP	0.157365	0.495502	0.634091	6	hsa-let-7a-5p/hsa-let-7e-5p/hsa-let-7f-5p/hsa-let-7g-5p/hsa-miR-98-5p	hsa-miR-181c-5p	hsa-miR-22-3p	hsa-miR-23a-3p/hsa-miR-23b-3p	hsa-miR-26a-5p/hsa-miR-26b-5p	hsa-miR-27a-3p
PIK3CB	0.157365	0.495502	0.634091	6	hsa-miR-181c-5p	hsa-miR-23a-3p/hsa-miR-23b-3p	hsa-miR-26a-5p/hsa-miR-26b-5p	hsa-miR-29b-3p	hsa-miR-301a-3p	hsa-miR-433-3p
PKIA	0.157365	0.495502	0.634091	6	hsa-let-7a-5p/hsa-let-7e-5p/hsa-let-7f-5p/hsa-let-7g-5p/hsa-miR-98-5p	hsa-miR-103a-3p/hsa-miR-107	hsa-miR-15b-5p/hsa-miR-15b-5p	hsa-miR-221-3p	hsa-miR-23a-3p/hsa-miR-23b-3p	hsa-miR-27a-3p
RAP2C	0.157365	0.495502	0.634091	6	hsa-miR-103a-3p/hsa-miR-107	hsa-miR-133b	hsa-miR-15b-5p/hsa-miR-15b-5p	hsa-miR-200a-3p	hsa-miR-26a-5p/hsa-miR-26b-5p	hsa-miR-301a-3p
SMURF2	0.157365	0.495502	0.634091	6	hsa-miR-148a-3p	hsa-miR-15b-5p/hsa-miR-15b-5p	hsa-miR-23a-3p/hsa-miR-23b-3p	hsa-miR-27a-3p	hsa-miR-29b-3p	hsa-miR-301a-3p
TRERF1	0.157365	0.495502	0.634091	6	hsa-miR-181c-5p	hsa-miR-23a-3p/hsa-miR-23b-3p	hsa-miR-26a-5p/hsa-miR-26b-5p	hsa-miR-27a-3p	hsa-miR-301a-3p	hsa-miR-502-3p
UBE2J1	0.157365	0.495502	0.634091	6	hsa-miR-103a-3p/hsa-miR-107	hsa-miR-142-5p	hsa-miR-15b-5p/hsa-miR-15b-5p	hsa-miR-181c-5p	hsa-miR-221-3p	hsa-miR-26a-5p/hsa-miR-26b-5p
WEE1	0.157365	0.495502	0.634091	6	hsa-miR-15b-5p/hsa-miR-15b-5p	hsa-miR-221-3p	hsa-miR-23a-3p/hsa-miR-23b-3p	hsa-miR-26a-5p/hsa-miR-26b-5p	hsa-miR-27a-3p	hsa-miR-301a-3p
XPO4	0.157365	0.495502	0.634091	6	hsa-miR-103a-3p/hsa-miR-107	hsa-miR-133b	hsa-miR-148a-3p	hsa-miR-15b-5p/hsa-miR-15b-5p	hsa-miR-29b-3p	hsa-miR-301a-3p
GABRB1	0.158334	0.495502	0.666234	7	hsa-let-7a-5p/hsa-let-7e-5p/hsa-let-7f-5p/hsa-let-7g-5p/hsa-miR-98-5p	hsa-miR-103a-3p/hsa-miR-107	hsa-miR-133b	hsa-miR-181c-5p	hsa-miR-23a-3p/hsa-miR-23b-3p	hsa-miR-27a-3p	hsa-miR-29b-3p
PDE3A	0.158334	0.495502	0.666234	7	hsa-miR-103a-3p/hsa-miR-107	hsa-miR-181c-5p	hsa-miR-221-3p	hsa-miR-23a-3p/hsa-miR-23b-3p	hsa-miR-27a-3p	hsa-miR-29b-3p	hsa-miR-532-5p
PPP6C	0.158334	0.495502	0.666234	7	hsa-miR-103a-3p/hsa-miR-107	hsa-miR-15b-5p/hsa-miR-15b-5p	hsa-miR-181c-5p	hsa-miR-199a-5p	hsa-miR-221-3p	hsa-miR-23a-3p/hsa-miR-23b-3p	hsa-miR-26a-5p/hsa-miR-26b-5p
ACTN2	0.159573	0.495502	0.368182	2	hsa-miR-23a-3p/hsa-miR-23b-3p	hsa-miR-29b-3p
ADAMTS10	0.159573	0.495502	0.368182	2	hsa-miR-27a-3p	hsa-miR-29b-3p
ADAMTSL1	0.159573	0.495502	0.368182	2	hsa-miR-181c-5p	hsa-miR-27a-3p
ADCY3	0.159573	0.495502	0.368182	2	hsa-miR-132-3p/hsa-miR-212-3p	hsa-miR-27a-3p
ALDH1L2	0.159573	0.495502	0.368182	2	hsa-miR-23a-3p/hsa-miR-23b-3p	hsa-miR-27a-3p
ARFGAP2	0.159573	0.495502	0.368182	2	hsa-miR-132-3p/hsa-miR-212-3p	hsa-miR-15b-5p/hsa-miR-15b-5p
ARHGAP9	0.159573	0.495502	0.368182	2	hsa-miR-133b	hsa-miR-22-3p
ARHGEF4	0.159573	0.495502	0.368182	2	hsa-miR-29b-3p	hsa-miR-301a-3p
ARL8B	0.159573	0.495502	0.368182	2	hsa-miR-148a-3p	hsa-miR-23a-3p/hsa-miR-23b-3p
ARNT2	0.159573	0.495502	0.368182	2	hsa-miR-181c-5p	hsa-miR-23a-3p/hsa-miR-23b-3p
ATOH1	0.159573	0.495502	0.368182	2	hsa-miR-142-5p	hsa-miR-22-3p
BET1	0.159573	0.495502	0.368182	2	hsa-miR-142-5p	hsa-miR-23a-3p/hsa-miR-23b-3p
C12orf79	0.159573	0.495502	0.368182	2	hsa-miR-148a-3p	hsa-miR-433-3p
C14orf1	0.159573	0.495502	0.368182	2	hsa-miR-15b-5p/hsa-miR-15b-5p	hsa-miR-338-3p
C1orf226	0.159573	0.495502	0.368182	2	hsa-miR-103a-3p/hsa-miR-107	hsa-miR-29b-3p
C6orf211	0.159573	0.495502	0.368182	2	hsa-let-7a-5p/hsa-let-7e-5p/hsa-let-7f-5p/hsa-let-7g-5p/hsa-miR-98-5p	hsa-miR-27a-3p
CACFD1	0.159573	0.495502	0.368182	2	hsa-let-7a-5p/hsa-let-7e-5p/hsa-let-7f-5p/hsa-let-7g-5p/hsa-miR-98-5p	hsa-miR-29b-3p
CALB1	0.159573	0.495502	0.368182	2	hsa-miR-193a-3p/hsa-miR-193b-3p	hsa-miR-301a-3p
CALR	0.159573	0.495502	0.368182	2	hsa-miR-148a-3p	hsa-miR-181c-5p
CAPZA2	0.159573	0.495502	0.368182	2	hsa-miR-103a-3p/hsa-miR-107	hsa-miR-15b-5p/hsa-miR-15b-5p
CBLL1	0.159573	0.495502	0.368182	2	hsa-miR-132-3p/hsa-miR-212-3p	hsa-miR-502-3p
CDC40	0.159573	0.495502	0.368182	2	hsa-miR-132-3p/hsa-miR-212-3p	hsa-miR-23a-3p/hsa-miR-23b-3p
CDKL2	0.159573	0.495502	0.368182	2	hsa-miR-181c-5p	hsa-miR-29b-3p
CERCAM	0.159573	0.495502	0.368182	2	hsa-let-7a-5p/hsa-let-7e-5p/hsa-let-7f-5p/hsa-let-7g-5p/hsa-miR-98-5p	hsa-miR-142-5p
COL21A1	0.159573	0.495502	0.368182	2	hsa-miR-27a-3p	hsa-miR-29b-3p
CPED1	0.159573	0.495502	0.368182	2	hsa-let-7a-5p/hsa-let-7e-5p/hsa-let-7f-5p/hsa-let-7g-5p/hsa-miR-98-5p	hsa-miR-26a-5p/hsa-miR-26b-5p
CSGALNACT2	0.159573	0.495502	0.368182	2	hsa-miR-23a-3p/hsa-miR-23b-3p	hsa-miR-29b-3p
CTTN	0.159573	0.495502	0.368182	2	hsa-miR-154-3p	hsa-miR-221-3p
DSC1	0.159573	0.495502	0.368182	2	hsa-miR-103a-3p/hsa-miR-107	hsa-miR-181c-5p
EDN1	0.159573	0.495502	0.368182	2	hsa-let-7a-5p/hsa-let-7e-5p/hsa-let-7f-5p/hsa-let-7g-5p/hsa-miR-98-5p	hsa-miR-301a-3p
EIF3M	0.159573	0.495502	0.368182	2	hsa-miR-15b-5p/hsa-miR-15b-5p	hsa-miR-23a-3p/hsa-miR-23b-3p
ELF4	0.159573	0.495502	0.368182	2	hsa-let-7a-5p/hsa-let-7e-5p/hsa-let-7f-5p/hsa-let-7g-5p/hsa-miR-98-5p	hsa-miR-23a-3p/hsa-miR-23b-3p
EML1	0.159573	0.495502	0.368182	2	hsa-miR-181c-5p	hsa-miR-27a-3p
EN1	0.159573	0.495502	0.368182	2	hsa-miR-29b-3p	hsa-miR-338-3p
EPB41L3	0.159573	0.495502	0.368182	2	hsa-miR-181c-5p	hsa-miR-199a-5p
EPHB4	0.159573	0.495502	0.368182	2	hsa-miR-133b	hsa-miR-301a-3p
EXOSC3	0.159573	0.495502	0.368182	2	hsa-miR-181c-5p	hsa-miR-199a-5p
EXTL2	0.159573	0.495502	0.368182	2	hsa-miR-132-3p/hsa-miR-212-3p	hsa-miR-433-3p
FAM136A	0.159573	0.495502	0.368182	2	hsa-miR-26a-5p/hsa-miR-26b-5p	hsa-miR-29b-3p
FAM188A	0.159573	0.495502	0.368182	2	hsa-miR-199a-5p	hsa-miR-200a-3p
FCHSD1	0.159573	0.495502	0.368182	2	hsa-miR-148a-3p	hsa-miR-199a-5p
FNDC4	0.159573	0.495502	0.368182	2	hsa-miR-27a-3p	hsa-miR-301a-3p
FPGS	0.159573	0.495502	0.368182	2	hsa-miR-199a-5p	hsa-miR-338-3p
GADD45G	0.159573	0.495502	0.368182	2	hsa-miR-103a-3p/hsa-miR-107	hsa-miR-15b-5p/hsa-miR-15b-5p
GRAMD1C	0.159573	0.495502	0.368182	2	hsa-miR-26a-5p/hsa-miR-26b-5p	hsa-miR-27a-3p
GSTCD	0.159573	0.495502	0.368182	2	hsa-miR-103a-3p/hsa-miR-107	hsa-miR-15b-5p/hsa-miR-15b-5p
GTPBP2	0.159573	0.495502	0.368182	2	hsa-miR-103a-3p/hsa-miR-107	hsa-miR-29b-3p
H1F0	0.159573	0.495502	0.368182	2	hsa-miR-142-5p	hsa-miR-200a-3p
HABP4	0.159573	0.495502	0.368182	2	hsa-let-7a-5p/hsa-let-7e-5p/hsa-let-7f-5p/hsa-let-7g-5p/hsa-miR-98-5p	hsa-miR-301a-3p
[truncated: 2,538 more rows]
