# Supplementary material for: In silico detection of dysregulated genes and molecular pathways in Alzheimer’s disease as basis for food restoring approach
Source: PeerJ. 2025 Apr 7;13:e19100. doi: 10.7717/peerj.19100 (PMC11984471; doi:10.7717/peerj.19100)
Supplement: Supplemental Information 7 — Target genes for each miRs up-regulated from the input list. [file peerj-13-19100-s007.xlsx]

## Sheet: Sheet1
Mienturnet Enrichment results TargetScan
Gene Symbol	p-value	FDR	Odd ratio	Number of interactions	microRNA 1	microRNA 2	microRNA 3	microRNA 4	microRNA 5	microRNA 6	microRNA 7	microRNA 8	microRNA 9	microRNA 10	microRNA 11	microRNA 12	microRNA 13	microRNA 14	microRNA 15	microRNA 16	microRNA 17	microRNA 18	microRNA 19	microRNA 20	microRNA 21	microRNA 22	microRNA 23	microRNA 24	microRNA 25	microRNA 26	microRNA 27	microRNA 28
BAHD1	7.03152e-05	0.438053	0.38961	14	hsa-let-7b-5p/hsa-let-7e-5p/hsa-let-7f-5p	hsa-miR-128-3p/hsa-miR-128-3p/hsa-miR-216a-3p	hsa-miR-141-3p/hsa-miR-200a-3p	hsa-miR-186-5p/hsa-miR-186-5p	hsa-miR-21-5p	hsa-miR-216a-5p	hsa-miR-216b-5p	hsa-miR-27b-3p	hsa-miR-296-5p	hsa-miR-29a-3p/hsa-miR-29b-3p	hsa-miR-302b-3p/hsa-miR-520a-3p	hsa-miR-30b-5p/hsa-miR-30c-5p/hsa-miR-30d-5p	hsa-miR-371a-5p	hsa-miR-9-5p
DHX40	0.00012793	0.438053	0.405195	14	hsa-miR-141-3p/hsa-miR-200a-3p	hsa-miR-142-5p	hsa-miR-155-5p	hsa-miR-186-5p/hsa-miR-186-5p	hsa-miR-26a-5p	hsa-miR-28-3p	hsa-miR-302b-3p/hsa-miR-520a-3p	hsa-miR-30b-5p/hsa-miR-30c-5p/hsa-miR-30d-5p	hsa-miR-381-3p	hsa-miR-425-5p	hsa-miR-455-5p	hsa-miR-494-3p	hsa-miR-501-3p	hsa-miR-9-5p
NEO1	0.000204943	0.438053	0.315152	9	hsa-miR-125a-5p/hsa-miR-125b-5p	hsa-miR-128-3p/hsa-miR-128-3p/hsa-miR-216a-3p	hsa-miR-216a-5p	hsa-miR-216b-5p	hsa-miR-27b-3p	hsa-miR-374a-5p	hsa-miR-429	hsa-miR-92a-3p/hsa-miR-92b-3p	hsa-miR-9-5p
MMD	0.000299692	0.438053	0.3	8	hsa-miR-128-3p/hsa-miR-128-3p/hsa-miR-216a-3p	hsa-miR-140-5p	hsa-miR-205-5p	hsa-miR-27b-3p	hsa-miR-30b-5p/hsa-miR-30c-5p/hsa-miR-30d-5p	hsa-miR-429	hsa-miR-494-3p	hsa-miR-92a-3p/hsa-miR-92b-3p
SSX2IP	0.000391314	0.438053	0.41958	13	hsa-miR-216a-5p	hsa-miR-26a-5p	hsa-miR-27b-3p	hsa-miR-302b-3p/hsa-miR-520a-3p	hsa-miR-30b-5p/hsa-miR-30c-5p/hsa-miR-30d-5p	hsa-miR-362-3p	hsa-miR-371a-5p	hsa-miR-374a-5p	hsa-miR-384	hsa-miR-425-5p	hsa-miR-494-3p	hsa-miR-7-5p	hsa-miR-9-5p
ADAMTS9	0.000407773	0.438053	0.280519	7	hsa-miR-135a-5p	hsa-miR-204-5p	hsa-miR-205-5p	hsa-miR-29a-3p/hsa-miR-29b-3p	hsa-miR-30b-5p/hsa-miR-30c-5p/hsa-miR-30d-5p	hsa-miR-92a-3p/hsa-miR-92b-3p	hsa-miR-9-5p
LRRC8B	0.00047758	0.438053	0.339394	9	hsa-let-7b-5p/hsa-let-7e-5p/hsa-let-7f-5p	hsa-miR-100-5p	hsa-miR-125a-5p/hsa-miR-125b-5p	hsa-miR-146a-5p	hsa-miR-155-5p	hsa-miR-27b-3p	hsa-miR-381-3p	hsa-miR-7-5p	hsa-miR-92a-3p/hsa-miR-92b-3p
ARRDC4	0.000486026	0.438053	0.254545	6	hsa-let-7b-5p/hsa-let-7e-5p/hsa-let-7f-5p	hsa-miR-128-3p/hsa-miR-128-3p/hsa-miR-216a-3p	hsa-miR-27b-3p	hsa-miR-29a-3p/hsa-miR-29b-3p	hsa-miR-424-5p	hsa-miR-92a-3p/hsa-miR-92b-3p
GRHL1	0.000486026	0.438053	0.254545	6	hsa-miR-100-5p	hsa-miR-125a-5p/hsa-miR-125b-5p	hsa-miR-30b-5p/hsa-miR-30c-5p/hsa-miR-30d-5p	hsa-miR-381-3p	hsa-miR-92a-3p/hsa-miR-92b-3p	hsa-miR-9-5p
C16orf52	0.000605904	0.438053	0.451948	14	hsa-let-7b-5p/hsa-let-7e-5p/hsa-let-7f-5p	hsa-miR-128-3p/hsa-miR-128-3p/hsa-miR-216a-3p	hsa-miR-135a-5p	hsa-miR-146a-5p	hsa-miR-186-5p/hsa-miR-186-5p	hsa-miR-205-5p	hsa-miR-21-5p	hsa-miR-216b-5p	hsa-miR-27b-3p	hsa-miR-30b-5p/hsa-miR-30c-5p/hsa-miR-30d-5p	hsa-miR-381-3p	hsa-miR-424-5p	hsa-miR-429	hsa-miR-92a-3p/hsa-miR-92b-3p
A1CF	0.000993297	0.438053	0.363636	9	hsa-let-7b-5p/hsa-let-7e-5p/hsa-let-7f-5p	hsa-miR-26a-5p	hsa-miR-27b-3p	hsa-miR-302b-3p/hsa-miR-520a-3p	hsa-miR-30b-5p/hsa-miR-30c-5p/hsa-miR-30d-5p	hsa-miR-424-5p	hsa-miR-429	hsa-miR-7-5p	hsa-miR-9-5p
CDR2L	0.000993297	0.438053	0.363636	9	hsa-miR-125a-5p/hsa-miR-125b-5p	hsa-miR-128-3p/hsa-miR-128-3p/hsa-miR-216a-3p	hsa-miR-135a-5p	hsa-miR-138-5p	hsa-miR-186-5p/hsa-miR-186-5p	hsa-miR-216b-5p	hsa-miR-26a-5p	hsa-miR-27b-3p	hsa-miR-429
RNF144A	0.000993297	0.438053	0.363636	9	hsa-miR-125a-5p/hsa-miR-125b-5p	hsa-miR-128-3p/hsa-miR-128-3p/hsa-miR-216a-3p	hsa-miR-135a-5p	hsa-miR-27b-3p	hsa-miR-381-3p	hsa-miR-448	hsa-miR-501-3p	hsa-miR-7-5p	hsa-miR-9-5p
MIER3	0.00106178	0.438053	0.504545	16	hsa-miR-128-3p/hsa-miR-128-3p/hsa-miR-216a-3p	hsa-miR-138-5p	hsa-miR-140-5p	hsa-miR-141-3p/hsa-miR-200a-3p	hsa-miR-142-5p	hsa-miR-155-5p	hsa-miR-204-5p	hsa-miR-205-5p	hsa-miR-26a-5p	hsa-miR-27b-3p	hsa-miR-29a-3p/hsa-miR-29b-3p	hsa-miR-302b-3p/hsa-miR-520a-3p	hsa-miR-30b-5p/hsa-miR-30c-5p/hsa-miR-30d-5p	hsa-miR-429	hsa-miR-92a-3p/hsa-miR-92b-3p	hsa-miR-9-5p
CCNJL	0.00112995	0.438053	0.311688	7	hsa-let-7b-5p/hsa-let-7e-5p/hsa-let-7f-5p	hsa-miR-125a-5p/hsa-miR-125b-5p	hsa-miR-26a-5p	hsa-miR-30b-5p/hsa-miR-30c-5p/hsa-miR-30d-5p	hsa-miR-424-5p	hsa-miR-429	hsa-miR-92a-3p/hsa-miR-92b-3p
VPS26B	0.00112995	0.438053	0.311688	7	hsa-let-7b-5p/hsa-let-7e-5p/hsa-let-7f-5p	hsa-miR-138-5p	hsa-miR-141-3p/hsa-miR-200a-3p	hsa-miR-186-5p/hsa-miR-186-5p	hsa-miR-27b-3p	hsa-miR-30b-5p/hsa-miR-30c-5p/hsa-miR-30d-5p	hsa-miR-494-3p
CPEB4	0.00116451	0.438053	0.551196	19	hsa-let-7b-5p/hsa-let-7e-5p/hsa-let-7f-5p	hsa-miR-125a-5p/hsa-miR-125b-5p	hsa-miR-128-3p/hsa-miR-128-3p/hsa-miR-216a-3p	hsa-miR-141-3p/hsa-miR-200a-3p	hsa-miR-155-5p	hsa-miR-204-5p	hsa-miR-216a-5p	hsa-miR-216b-5p	hsa-miR-26a-5p	hsa-miR-27b-3p	hsa-miR-302b-3p/hsa-miR-520a-3p	hsa-miR-30b-5p/hsa-miR-30c-5p/hsa-miR-30d-5p	hsa-miR-362-3p	hsa-miR-362-5p	hsa-miR-371a-5p	hsa-miR-374a-5p	hsa-miR-455-5p	hsa-miR-92a-3p/hsa-miR-92b-3p	hsa-miR-9-5p
ARL5B	0.00116487	0.438053	0.416529	11	hsa-let-7b-5p/hsa-let-7e-5p/hsa-let-7f-5p	hsa-miR-135a-5p	hsa-miR-138-5p	hsa-miR-155-5p	hsa-miR-204-5p	hsa-miR-26a-5p	hsa-miR-29a-3p/hsa-miR-29b-3p	hsa-miR-424-5p	hsa-miR-425-5p	hsa-miR-448	hsa-miR-92a-3p/hsa-miR-92b-3p
REST	0.00116487	0.438053	0.416529	11	hsa-miR-125a-5p/hsa-miR-125b-5p	hsa-miR-135a-5p	hsa-miR-140-5p	hsa-miR-142-5p	hsa-miR-26a-5p	hsa-miR-29a-3p/hsa-miR-29b-3p	hsa-miR-302b-3p/hsa-miR-520a-3p	hsa-miR-422a	hsa-miR-448	hsa-miR-92a-3p/hsa-miR-92b-3p	hsa-miR-9-5p
CPEB2	0.00154005	0.438053	0.518182	16	hsa-let-7b-5p/hsa-let-7e-5p/hsa-let-7f-5p	hsa-miR-142-5p	hsa-miR-186-5p/hsa-miR-186-5p	hsa-miR-205-5p	hsa-miR-216b-5p	hsa-miR-26a-5p	hsa-miR-302b-3p/hsa-miR-520a-3p	hsa-miR-30b-5p/hsa-miR-30c-5p/hsa-miR-30d-5p	hsa-miR-34a-5p/hsa-miR-34c-5p/hsa-miR-449a/hsa-miR-449b-5p	hsa-miR-424-5p	hsa-miR-425-5p	hsa-miR-448	hsa-miR-501-3p	hsa-miR-7-5p	hsa-miR-92a-3p/hsa-miR-92b-3p	hsa-miR-9-5p
PAX9	0.00161584	0.438053	0.354545	8	hsa-miR-125a-5p/hsa-miR-125b-5p	hsa-miR-128-3p/hsa-miR-128-3p/hsa-miR-216a-3p	hsa-miR-140-5p	hsa-miR-205-5p	hsa-miR-216a-5p	hsa-miR-27b-3p	hsa-miR-30b-5p/hsa-miR-30c-5p/hsa-miR-30d-5p	hsa-miR-92a-3p/hsa-miR-92b-3p
PITPNC1	0.00161584	0.438053	0.354545	8	hsa-miR-135a-5p	hsa-miR-26a-5p	hsa-miR-30b-5p/hsa-miR-30c-5p/hsa-miR-30d-5p	hsa-miR-34a-5p/hsa-miR-34c-5p/hsa-miR-449a/hsa-miR-449b-5p	hsa-miR-374a-5p	hsa-miR-425-5p	hsa-miR-92a-3p/hsa-miR-92b-3p	hsa-miR-9-5p
CRAMP1L	0.00161714	0.438053	0.290909	6	hsa-miR-125a-5p/hsa-miR-125b-5p	hsa-miR-135a-5p	hsa-miR-186-5p/hsa-miR-186-5p	hsa-miR-374a-5p	hsa-miR-424-5p	hsa-miR-501-3p
FGF18	0.00161714	0.438053	0.290909	6	hsa-miR-204-5p	hsa-miR-21-5p	hsa-miR-374a-5p	hsa-miR-424-5p	hsa-miR-429	hsa-miR-9-5p
MAP2K7	0.00161714	0.438053	0.290909	6	hsa-miR-125a-5p/hsa-miR-125b-5p	hsa-miR-128-3p/hsa-miR-128-3p/hsa-miR-216a-3p	hsa-miR-138-5p	hsa-miR-141-3p/hsa-miR-200a-3p	hsa-miR-27b-3p	hsa-miR-9-5p
PIGM	0.00161714	0.438053	0.290909	6	hsa-miR-27b-3p	hsa-miR-302b-3p/hsa-miR-520a-3p	hsa-miR-384	hsa-miR-429	hsa-miR-494-3p	hsa-miR-9-5p
RPS6KA2	0.00161714	0.438053	0.290909	6	hsa-miR-26a-5p	hsa-miR-302b-3p/hsa-miR-520a-3p	hsa-miR-30b-5p/hsa-miR-30c-5p/hsa-miR-30d-5p	hsa-miR-371a-5p	hsa-miR-429	hsa-miR-9-5p
TAF5L	0.00161714	0.438053	0.290909	6	hsa-miR-125a-5p/hsa-miR-125b-5p	hsa-miR-128-3p/hsa-miR-128-3p/hsa-miR-216a-3p	hsa-miR-204-5p	hsa-miR-216a-5p	hsa-miR-27b-3p	hsa-miR-374a-5p
SERBP1	0.00181798	0.438053	0.454545	12	hsa-miR-128-3p/hsa-miR-128-3p/hsa-miR-216a-3p	hsa-miR-142-5p	hsa-miR-216a-5p	hsa-miR-216b-5p	hsa-miR-26a-5p	hsa-miR-27b-3p	hsa-miR-296-3p	hsa-miR-29a-3p/hsa-miR-29b-3p	hsa-miR-362-3p	hsa-miR-424-5p	hsa-miR-448	hsa-miR-9-5p
ZNF652	0.00183986	0.438053	0.604959	22	hsa-let-7b-5p/hsa-let-7e-5p/hsa-let-7f-5p	hsa-miR-125a-5p/hsa-miR-125b-5p	hsa-miR-128-3p/hsa-miR-128-3p/hsa-miR-216a-3p	hsa-miR-135a-5p	hsa-miR-140-5p	hsa-miR-146a-5p	hsa-miR-155-5p	hsa-miR-186-5p/hsa-miR-186-5p	hsa-miR-205-5p	hsa-miR-216a-5p	hsa-miR-216b-5p	hsa-miR-26a-5p	hsa-miR-302b-3p/hsa-miR-520a-3p	hsa-miR-30b-5p/hsa-miR-30c-5p/hsa-miR-30d-5p	hsa-miR-371a-5p	hsa-miR-381-3p	hsa-miR-422a	hsa-miR-424-5p	hsa-miR-429	hsa-miR-448	hsa-miR-7-5p	hsa-miR-92a-3p/hsa-miR-92b-3p
GALNT7	0.00188817	0.438053	0.387879	9	hsa-miR-125a-5p/hsa-miR-125b-5p	hsa-miR-128-3p/hsa-miR-128-3p/hsa-miR-216a-3p	hsa-miR-26a-5p	hsa-miR-27b-3p	hsa-miR-30b-5p/hsa-miR-30c-5p/hsa-miR-30d-5p	hsa-miR-34a-5p/hsa-miR-34c-5p/hsa-miR-449a/hsa-miR-449b-5p	hsa-miR-424-5p	hsa-miR-494-3p	hsa-miR-92a-3p/hsa-miR-92b-3p
PDP2	0.00188817	0.438053	0.387879	9	hsa-let-7b-5p/hsa-let-7e-5p/hsa-let-7f-5p	hsa-miR-128-3p/hsa-miR-128-3p/hsa-miR-216a-3p	hsa-miR-186-5p/hsa-miR-186-5p	hsa-miR-27b-3p	hsa-miR-29a-3p/hsa-miR-29b-3p	hsa-miR-30b-5p/hsa-miR-30c-5p/hsa-miR-30d-5p	hsa-miR-374a-5p	hsa-miR-448	hsa-miR-92a-3p/hsa-miR-92b-3p
SURF4	0.00188817	0.438053	0.387879	9	hsa-let-7b-5p/hsa-let-7e-5p/hsa-let-7f-5p	hsa-miR-128-3p/hsa-miR-128-3p/hsa-miR-216a-3p	hsa-miR-142-5p	hsa-miR-27b-3p	hsa-miR-30b-5p/hsa-miR-30c-5p/hsa-miR-30d-5p	hsa-miR-34a-5p/hsa-miR-34c-5p/hsa-miR-449a/hsa-miR-449b-5p	hsa-miR-371a-5p	hsa-miR-429	hsa-miR-7-5p
ARL6IP6	0.00204893	0.438053	0.218182	4	hsa-let-7b-5p/hsa-let-7e-5p/hsa-let-7f-5p	hsa-miR-26a-5p	hsa-miR-30b-5p/hsa-miR-30c-5p/hsa-miR-30d-5p	hsa-miR-429
COL4A2	0.00204893	0.438053	0.218182	4	hsa-let-7b-5p/hsa-let-7e-5p/hsa-let-7f-5p	hsa-miR-29a-3p/hsa-miR-29b-3p	hsa-miR-302b-3p/hsa-miR-520a-3p	hsa-miR-9-5p
DMTF1	0.00204893	0.438053	0.218182	4	hsa-miR-155-5p	hsa-miR-204-5p	hsa-miR-381-3p	hsa-miR-424-5p
NAPG	0.00204893	0.438053	0.218182	4	hsa-miR-138-5p	hsa-miR-30b-5p/hsa-miR-30c-5p/hsa-miR-30d-5p	hsa-miR-424-5p	hsa-miR-448
PKIB	0.00204893	0.438053	0.218182	4	hsa-miR-128-3p/hsa-miR-128-3p/hsa-miR-216a-3p	hsa-miR-27b-3p	hsa-miR-448	hsa-miR-9-5p
SKP2	0.00204893	0.438053	0.218182	4	hsa-miR-21-5p	hsa-miR-26a-5p	hsa-miR-30b-5p/hsa-miR-30c-5p/hsa-miR-30d-5p	hsa-miR-422a
SLC25A35	0.00204893	0.438053	0.218182	4	hsa-miR-125a-5p/hsa-miR-125b-5p	hsa-miR-204-5p	hsa-miR-216b-5p	hsa-miR-9-5p
CNOT8	0.00208687	0.438053	0.261818	5	hsa-miR-138-5p	hsa-miR-21-5p	hsa-miR-29a-3p/hsa-miR-29b-3p	hsa-miR-374a-5p	hsa-miR-7-5p
EN1	0.00208687	0.438053	0.261818	5	hsa-miR-128-3p/hsa-miR-128-3p/hsa-miR-216a-3p	hsa-miR-29a-3p/hsa-miR-29b-3p	hsa-miR-374a-5p	hsa-miR-381-3p	hsa-miR-9-5p
SBF1	0.00208687	0.438053	0.261818	5	hsa-miR-140-5p	hsa-miR-302b-3p/hsa-miR-520a-3p	hsa-miR-30b-5p/hsa-miR-30c-5p/hsa-miR-30d-5p	hsa-miR-362-3p	hsa-miR-429
ZNF282	0.00208687	0.438053	0.261818	5	hsa-let-7b-5p/hsa-let-7e-5p/hsa-let-7f-5p	hsa-miR-138-5p	hsa-miR-204-5p	hsa-miR-29a-3p/hsa-miR-29b-3p	hsa-miR-34a-5p/hsa-miR-34c-5p/hsa-miR-449a/hsa-miR-449b-5p
SOCS6	0.00215934	0.438882	0.498701	14	hsa-miR-128-3p/hsa-miR-128-3p/hsa-miR-216a-3p	hsa-miR-138-5p	hsa-miR-155-5p	hsa-miR-21-5p	hsa-miR-216b-5p	hsa-miR-26a-5p	hsa-miR-27b-3p	hsa-miR-296-3p	hsa-miR-30b-5p/hsa-miR-30c-5p/hsa-miR-30d-5p	hsa-miR-362-3p	hsa-miR-424-5p	hsa-miR-429	hsa-miR-494-3p	hsa-miR-92a-3p/hsa-miR-92b-3p
KLF12	0.00218586	0.438882	0.574163	19	hsa-miR-138-5p	hsa-miR-141-3p/hsa-miR-200a-3p	hsa-miR-151a-3p	hsa-miR-186-5p/hsa-miR-186-5p	hsa-miR-204-5p	hsa-miR-205-5p	hsa-miR-21-5p	hsa-miR-216a-5p	hsa-miR-216b-5p	hsa-miR-27b-3p	hsa-miR-29a-3p/hsa-miR-29b-3p	hsa-miR-302b-3p/hsa-miR-520a-3p	hsa-miR-30b-5p/hsa-miR-30c-5p/hsa-miR-30d-5p	hsa-miR-362-3p	hsa-miR-381-3p	hsa-miR-429	hsa-miR-501-3p	hsa-miR-7-5p	hsa-miR-9-5p
GMEB1	0.00249169	0.445147	0.486713	13	hsa-miR-135a-5p	hsa-miR-141-3p/hsa-miR-200a-3p	hsa-miR-204-5p	hsa-miR-26a-5p	hsa-miR-29a-3p/hsa-miR-29b-3p	hsa-miR-30b-5p/hsa-miR-30c-5p/hsa-miR-30d-5p	hsa-miR-374a-5p	hsa-miR-381-3p	hsa-miR-384	hsa-miR-448	hsa-miR-455-5p	hsa-miR-494-3p	hsa-miR-7-5p
PCGF3	0.00249169	0.445147	0.486713	13	hsa-let-7b-5p/hsa-let-7e-5p/hsa-let-7f-5p	hsa-miR-128-3p/hsa-miR-128-3p/hsa-miR-216a-3p	hsa-miR-138-5p	hsa-miR-141-3p/hsa-miR-200a-3p	hsa-miR-142-5p	hsa-miR-204-5p	hsa-miR-27b-3p	hsa-miR-29a-3p/hsa-miR-29b-3p	hsa-miR-30b-5p/hsa-miR-30c-5p/hsa-miR-30d-5p	hsa-miR-362-3p	hsa-miR-374a-5p	hsa-miR-381-3p	hsa-miR-92a-3p/hsa-miR-92b-3p
SLC2A14	0.00258291	0.445147	0.342857	7	hsa-miR-146a-5p	hsa-miR-26a-5p	hsa-miR-29a-3p/hsa-miR-29b-3p	hsa-miR-422a	hsa-miR-424-5p	hsa-miR-429	hsa-miR-92a-3p/hsa-miR-92b-3p
SYNJ2BP	0.00258291	0.445147	0.342857	7	hsa-let-7b-5p/hsa-let-7e-5p/hsa-let-7f-5p	hsa-miR-204-5p	hsa-miR-205-5p	hsa-miR-371a-5p	hsa-miR-429	hsa-miR-7-5p	hsa-miR-9-5p
IGF1R	0.00281507	0.445147	0.472727	12	hsa-let-7b-5p/hsa-let-7e-5p/hsa-let-7f-5p	hsa-miR-100-5p	hsa-miR-140-5p	hsa-miR-141-3p/hsa-miR-200a-3p	hsa-miR-186-5p/hsa-miR-186-5p	hsa-miR-30b-5p/hsa-miR-30c-5p/hsa-miR-30d-5p	hsa-miR-422a	hsa-miR-424-5p	hsa-miR-448	hsa-miR-455-5p	hsa-miR-494-3p	hsa-miR-7-5p
MFHAS1	0.00281507	0.445147	0.472727	12	hsa-miR-125a-5p/hsa-miR-125b-5p	hsa-miR-128-3p/hsa-miR-128-3p/hsa-miR-216a-3p	hsa-miR-135a-5p	hsa-miR-140-5p	hsa-miR-146a-5p	hsa-miR-26a-5p	hsa-miR-27b-3p	hsa-miR-30b-5p/hsa-miR-30c-5p/hsa-miR-30d-5p	hsa-miR-429	hsa-miR-448	hsa-miR-455-5p	hsa-miR-92a-3p/hsa-miR-92b-3p
DCP1A	0.00309811	0.445147	0.456198	11	hsa-miR-125a-5p/hsa-miR-125b-5p	hsa-miR-128-3p/hsa-miR-128-3p/hsa-miR-216a-3p	hsa-miR-135a-5p	hsa-miR-138-5p	hsa-miR-186-5p/hsa-miR-186-5p	hsa-miR-204-5p	hsa-miR-27b-3p	hsa-miR-30b-5p/hsa-miR-30c-5p/hsa-miR-30d-5p	hsa-miR-34a-5p/hsa-miR-34c-5p/hsa-miR-449a/hsa-miR-449b-5p	hsa-miR-424-5p	hsa-miR-92a-3p/hsa-miR-92b-3p
PSME3	0.00309811	0.445147	0.456198	11	hsa-miR-125a-5p/hsa-miR-125b-5p	hsa-miR-138-5p	hsa-miR-151a-3p	hsa-miR-186-5p/hsa-miR-186-5p	hsa-miR-205-5p	hsa-miR-216b-5p	hsa-miR-30b-5p/hsa-miR-30c-5p/hsa-miR-30d-5p	hsa-miR-374a-5p	hsa-miR-424-5p	hsa-miR-7-5p	hsa-miR-9-5p
SLC16A10	0.00309811	0.445147	0.456198	11	hsa-let-7b-5p/hsa-let-7e-5p/hsa-let-7f-5p	hsa-miR-128-3p/hsa-miR-128-3p/hsa-miR-216a-3p	hsa-miR-186-5p/hsa-miR-186-5p	hsa-miR-21-5p	hsa-miR-26a-5p	hsa-miR-27b-3p	hsa-miR-29a-3p/hsa-miR-29b-3p	hsa-miR-371a-5p	hsa-miR-429	hsa-miR-92a-3p/hsa-miR-92b-3p	hsa-miR-9-5p
PLXNA1	0.00313352	0.445147	0.381818	8	hsa-miR-125a-5p/hsa-miR-125b-5p	hsa-miR-216a-5p	hsa-miR-216b-5p	hsa-miR-29a-3p/hsa-miR-29b-3p	hsa-miR-302b-3p/hsa-miR-520a-3p	hsa-miR-30b-5p/hsa-miR-30c-5p/hsa-miR-30d-5p	hsa-miR-424-5p	hsa-miR-7-5p
PPM1H	0.00313352	0.445147	0.381818	8	hsa-miR-125a-5p/hsa-miR-125b-5p	hsa-miR-205-5p	hsa-miR-216a-5p	hsa-miR-26a-5p	hsa-miR-27b-3p	hsa-miR-374a-5p	hsa-miR-424-5p	hsa-miR-92a-3p/hsa-miR-92b-3p
SCN5A	0.00313352	0.445147	0.381818	8	hsa-let-7b-5p/hsa-let-7e-5p/hsa-let-7f-5p	hsa-miR-125a-5p/hsa-miR-125b-5p	hsa-miR-26a-5p	hsa-miR-302b-3p/hsa-miR-520a-3p	hsa-miR-374a-5p	hsa-miR-422a	hsa-miR-429	hsa-miR-448
SFXN2	0.00313352	0.445147	0.381818	8	hsa-miR-128-3p/hsa-miR-128-3p/hsa-miR-216a-3p	hsa-miR-138-5p	hsa-miR-204-5p	hsa-miR-27b-3p	hsa-miR-362-3p	hsa-miR-384	hsa-miR-424-5p	hsa-miR-9-5p
ZNF644	0.00329399	0.445147	0.436364	10	hsa-let-7b-5p/hsa-let-7e-5p/hsa-let-7f-5p	hsa-miR-141-3p/hsa-miR-200a-3p	hsa-miR-155-5p	hsa-miR-186-5p/hsa-miR-186-5p	hsa-miR-30b-5p/hsa-miR-30c-5p/hsa-miR-30d-5p	hsa-miR-34a-5p/hsa-miR-34c-5p/hsa-miR-449a/hsa-miR-449b-5p	hsa-miR-362-5p	hsa-miR-371a-5p	hsa-miR-374a-5p	hsa-miR-448
ERC2	0.00333575	0.445147	0.412121	9	hsa-miR-128-3p/hsa-miR-128-3p/hsa-miR-216a-3p	hsa-miR-135a-5p	hsa-miR-140-5p	hsa-miR-141-3p/hsa-miR-200a-3p	hsa-miR-26a-5p	hsa-miR-27b-3p	hsa-miR-30b-5p/hsa-miR-30c-5p/hsa-miR-30d-5p	hsa-miR-424-5p	hsa-miR-92a-3p/hsa-miR-92b-3p
KSR1	0.00333575	0.445147	0.412121	9	hsa-miR-128-3p/hsa-miR-128-3p/hsa-miR-216a-3p	hsa-miR-155-5p	hsa-miR-27b-3p	hsa-miR-30b-5p/hsa-miR-30c-5p/hsa-miR-30d-5p	hsa-miR-422a	hsa-miR-424-5p	hsa-miR-429	hsa-miR-7-5p	hsa-miR-9-5p
NUMBL	0.00333575	0.445147	0.412121	9	hsa-let-7b-5p/hsa-let-7e-5p/hsa-let-7f-5p	hsa-miR-125a-5p/hsa-miR-125b-5p	hsa-miR-140-5p	hsa-miR-141-3p/hsa-miR-200a-3p	hsa-miR-296-5p	hsa-miR-34a-5p/hsa-miR-34c-5p/hsa-miR-449a/hsa-miR-449b-5p	hsa-miR-362-3p	hsa-miR-374a-5p	hsa-miR-423-5p
PDS5B	0.00333575	0.445147	0.412121	9	hsa-miR-128-3p/hsa-miR-128-3p/hsa-miR-216a-3p	hsa-miR-141-3p/hsa-miR-200a-3p	hsa-miR-142-5p	hsa-miR-186-5p/hsa-miR-186-5p	hsa-miR-27b-3p	hsa-miR-30b-5p/hsa-miR-30c-5p/hsa-miR-30d-5p	hsa-miR-381-3p	hsa-miR-429	hsa-miR-92a-3p/hsa-miR-92b-3p
ESRRG	0.00341726	0.445147	0.564706	17	hsa-miR-125a-5p/hsa-miR-125b-5p	hsa-miR-141-3p/hsa-miR-200a-3p	hsa-miR-204-5p	hsa-miR-205-5p	hsa-miR-216b-5p	hsa-miR-26a-5p	hsa-miR-30b-5p/hsa-miR-30c-5p/hsa-miR-30d-5p	hsa-miR-362-3p	hsa-miR-374a-5p	hsa-miR-384	hsa-miR-424-5p	hsa-miR-429	hsa-miR-455-5p	hsa-miR-494-3p	hsa-miR-501-3p	hsa-miR-7-5p	hsa-miR-92a-3p/hsa-miR-92b-3p
ZBTB34	0.00341726	0.445147	0.564706	17	hsa-miR-125a-5p/hsa-miR-125b-5p	hsa-miR-128-3p/hsa-miR-128-3p/hsa-miR-216a-3p	hsa-miR-135a-5p	hsa-miR-141-3p/hsa-miR-200a-3p	hsa-miR-142-5p	hsa-miR-186-5p/hsa-miR-186-5p	hsa-miR-204-5p	hsa-miR-27b-3p	hsa-miR-29a-3p/hsa-miR-29b-3p	hsa-miR-30b-5p/hsa-miR-30c-5p/hsa-miR-30d-5p	hsa-miR-371a-5p	hsa-miR-374a-5p	hsa-miR-424-5p	hsa-miR-425-5p	hsa-miR-448	hsa-miR-92a-3p/hsa-miR-92b-3p	hsa-miR-9-5p
CADM1	0.00389893	0.445147	0.597129	19	hsa-miR-128-3p/hsa-miR-128-3p/hsa-miR-216a-3p	hsa-miR-135a-5p	hsa-miR-138-5p	hsa-miR-141-3p/hsa-miR-200a-3p	hsa-miR-142-5p	hsa-miR-186-5p/hsa-miR-186-5p	hsa-miR-205-5p	hsa-miR-21-5p	hsa-miR-216a-5p	hsa-miR-27b-3p	hsa-miR-30b-5p/hsa-miR-30c-5p/hsa-miR-30d-5p	hsa-miR-362-3p	hsa-miR-381-3p	hsa-miR-384	hsa-miR-424-5p	hsa-miR-429	hsa-miR-494-3p	hsa-miR-501-3p	hsa-miR-7-5p
CCDC43	0.00403587	0.445147	0.327273	6	hsa-miR-205-5p	hsa-miR-216a-5p	hsa-miR-30b-5p/hsa-miR-30c-5p/hsa-miR-30d-5p	hsa-miR-384	hsa-miR-7-5p	hsa-miR-9-5p
CCNE2	0.00403587	0.445147	0.327273	6	hsa-miR-141-3p/hsa-miR-200a-3p	hsa-miR-30b-5p/hsa-miR-30c-5p/hsa-miR-30d-5p	hsa-miR-34a-5p/hsa-miR-34c-5p/hsa-miR-449a/hsa-miR-449b-5p	hsa-miR-374a-5p	hsa-miR-92a-3p/hsa-miR-92b-3p	hsa-miR-9-5p
COL27A1	0.00403587	0.445147	0.327273	6	hsa-let-7b-5p/hsa-let-7e-5p/hsa-let-7f-5p	hsa-miR-128-3p/hsa-miR-128-3p/hsa-miR-216a-3p	hsa-miR-27b-3p	hsa-miR-29a-3p/hsa-miR-29b-3p	hsa-miR-92a-3p/hsa-miR-92b-3p	hsa-miR-9-5p
COL9A1	0.00403587	0.445147	0.327273	6	hsa-let-7b-5p/hsa-let-7e-5p/hsa-let-7f-5p	hsa-miR-216a-5p	hsa-miR-26a-5p	hsa-miR-29a-3p/hsa-miR-29b-3p	hsa-miR-371a-5p	hsa-miR-9-5p
DKFZP779J2370	0.00403587	0.445147	0.327273	6	hsa-miR-125a-5p/hsa-miR-125b-5p	hsa-miR-135a-5p	hsa-miR-216a-5p	hsa-miR-216b-5p	hsa-miR-422a	hsa-miR-451a
LEP	0.00403587	0.445147	0.327273	6	hsa-miR-125a-5p/hsa-miR-125b-5p	hsa-miR-128-3p/hsa-miR-128-3p/hsa-miR-216a-3p	hsa-miR-27b-3p	hsa-miR-296-5p	hsa-miR-29a-3p/hsa-miR-29b-3p	hsa-miR-9-5p
LMAN1	0.00403587	0.445147	0.327273	6	hsa-miR-138-5p	hsa-miR-140-5p	hsa-miR-186-5p/hsa-miR-186-5p	hsa-miR-26a-5p	hsa-miR-34a-5p/hsa-miR-34c-5p/hsa-miR-449a/hsa-miR-449b-5p	hsa-miR-429
RELN	0.00403587	0.445147	0.327273	6	hsa-miR-128-3p/hsa-miR-128-3p/hsa-miR-216a-3p	hsa-miR-138-5p	hsa-miR-27b-3p	hsa-miR-34a-5p/hsa-miR-34c-5p/hsa-miR-449a/hsa-miR-449b-5p	hsa-miR-424-5p	hsa-miR-429
RGPD4	0.00403587	0.445147	0.327273	6	hsa-miR-128-3p/hsa-miR-128-3p/hsa-miR-216a-3p	hsa-miR-142-5p	hsa-miR-186-5p/hsa-miR-186-5p	hsa-miR-205-5p	hsa-miR-27b-3p	hsa-miR-424-5p
RGPD6	0.00403587	0.445147	0.327273	6	hsa-miR-128-3p/hsa-miR-128-3p/hsa-miR-216a-3p	hsa-miR-142-5p	hsa-miR-186-5p/hsa-miR-186-5p	hsa-miR-205-5p	hsa-miR-27b-3p	hsa-miR-424-5p
YAP1	0.00403587	0.445147	0.327273	6	hsa-miR-141-3p/hsa-miR-200a-3p	hsa-miR-205-5p	hsa-miR-21-5p	hsa-miR-27b-3p	hsa-miR-424-5p	hsa-miR-9-5p
PARD6B	0.00422265	0.445147	0.490909	12	hsa-let-7b-5p/hsa-let-7e-5p/hsa-let-7f-5p	hsa-miR-128-3p/hsa-miR-128-3p/hsa-miR-216a-3p	hsa-miR-140-5p	hsa-miR-142-5p	hsa-miR-205-5p	hsa-miR-27b-3p	hsa-miR-34a-5p/hsa-miR-34c-5p/hsa-miR-449a/hsa-miR-449b-5p	hsa-miR-374a-5p	hsa-miR-381-3p	hsa-miR-424-5p	hsa-miR-429	hsa-miR-7-5p
PHF21A	0.00445209	0.445147	0.52987	14	hsa-miR-138-5p	hsa-miR-141-3p/hsa-miR-200a-3p	hsa-miR-186-5p/hsa-miR-186-5p	hsa-miR-26a-5p	hsa-miR-29a-3p/hsa-miR-29b-3p	hsa-miR-362-3p	hsa-miR-374a-5p	hsa-miR-381-3p	hsa-miR-424-5p	hsa-miR-425-5p	hsa-miR-429	hsa-miR-448	hsa-miR-7-5p	hsa-miR-9-5p
SIRT1	0.00476075	0.445147	0.476033	11	hsa-miR-128-3p/hsa-miR-128-3p/hsa-miR-216a-3p	hsa-miR-135a-5p	hsa-miR-138-5p	hsa-miR-141-3p/hsa-miR-200a-3p	hsa-miR-155-5p	hsa-miR-204-5p	hsa-miR-29a-3p/hsa-miR-29b-3p	hsa-miR-30b-5p/hsa-miR-30c-5p/hsa-miR-30d-5p	hsa-miR-448	hsa-miR-494-3p	hsa-miR-9-5p
JHDM1D	0.00491044	0.445147	0.593939	18	hsa-miR-125a-5p/hsa-miR-125b-5p	hsa-miR-128-3p/hsa-miR-128-3p/hsa-miR-216a-3p	hsa-miR-135a-5p	hsa-miR-140-5p	hsa-miR-155-5p	hsa-miR-186-5p/hsa-miR-186-5p	hsa-miR-21-5p	hsa-miR-216a-5p	hsa-miR-216b-5p	hsa-miR-27b-3p	hsa-miR-34a-5p/hsa-miR-34c-5p/hsa-miR-449a/hsa-miR-449b-5p	hsa-miR-374a-5p	hsa-miR-381-3p	hsa-miR-429	hsa-miR-448	hsa-miR-501-3p	hsa-miR-7-5p	hsa-miR-9-5p
C10orf118	0.00515235	0.445147	0.374026	7	hsa-miR-138-5p	hsa-miR-186-5p/hsa-miR-186-5p	hsa-miR-429	hsa-miR-494-3p	hsa-miR-7-5p	hsa-miR-92a-3p/hsa-miR-92b-3p	hsa-miR-9-5p
CACNG2	0.00515235	0.445147	0.374026	7	hsa-miR-125a-5p/hsa-miR-125b-5p	hsa-miR-128-3p/hsa-miR-128-3p/hsa-miR-216a-3p	hsa-miR-135a-5p	hsa-miR-186-5p/hsa-miR-186-5p	hsa-miR-204-5p	hsa-miR-27b-3p	hsa-miR-34a-5p/hsa-miR-34c-5p/hsa-miR-449a/hsa-miR-449b-5p
DOLPP1	0.00515235	0.445147	0.374026	7	hsa-miR-135a-5p	hsa-miR-141-3p/hsa-miR-200a-3p	hsa-miR-29a-3p/hsa-miR-29b-3p	hsa-miR-30b-5p/hsa-miR-30c-5p/hsa-miR-30d-5p	hsa-miR-423-5p	hsa-miR-424-5p	hsa-miR-9-5p
GATA3	0.00515235	0.445147	0.374026	7	hsa-miR-135a-5p	hsa-miR-141-3p/hsa-miR-200a-3p	hsa-miR-142-5p	hsa-miR-155-5p	hsa-miR-205-5p	hsa-miR-27b-3p	hsa-miR-374a-5p
RAB33B	0.00515235	0.445147	0.374026	7	hsa-miR-128-3p/hsa-miR-128-3p/hsa-miR-216a-3p	hsa-miR-135a-5p	hsa-miR-204-5p	hsa-miR-27b-3p	hsa-miR-28-3p	hsa-miR-371a-5p	hsa-miR-9-5p
SUV39H2	0.00515235	0.445147	0.374026	7	hsa-let-7b-5p/hsa-let-7e-5p/hsa-let-7f-5p	hsa-miR-125a-5p/hsa-miR-125b-5p	hsa-miR-141-3p/hsa-miR-200a-3p	hsa-miR-302b-3p/hsa-miR-520a-3p	hsa-miR-30b-5p/hsa-miR-30c-5p/hsa-miR-30d-5p	hsa-miR-381-3p	hsa-miR-494-3p
ZNF362	0.00515235	0.445147	0.374026	7	hsa-let-7b-5p/hsa-let-7e-5p/hsa-let-7f-5p	hsa-miR-135a-5p	hsa-miR-29a-3p/hsa-miR-29b-3p	hsa-miR-302b-3p/hsa-miR-520a-3p	hsa-miR-424-5p	hsa-miR-429	hsa-miR-9-5p
MIB1	0.00522956	0.445147	0.458182	10	hsa-let-7b-5p/hsa-let-7e-5p/hsa-let-7f-5p	hsa-miR-125a-5p/hsa-miR-125b-5p	hsa-miR-141-3p/hsa-miR-200a-3p	hsa-miR-186-5p/hsa-miR-186-5p	hsa-miR-26a-5p	hsa-miR-29a-3p/hsa-miR-29b-3p	hsa-miR-302b-3p/hsa-miR-520a-3p	hsa-miR-30b-5p/hsa-miR-30c-5p/hsa-miR-30d-5p	hsa-miR-424-5p	hsa-miR-429
TP53INP1	0.00527093	0.445147	0.52028	13	hsa-miR-125a-5p/hsa-miR-125b-5p	hsa-miR-140-5p	hsa-miR-141-3p/hsa-miR-200a-3p	hsa-miR-142-5p	hsa-miR-155-5p	hsa-miR-204-5p	hsa-miR-205-5p	hsa-miR-26a-5p	hsa-miR-29a-3p/hsa-miR-29b-3p	hsa-miR-302b-3p/hsa-miR-520a-3p	hsa-miR-30b-5p/hsa-miR-30c-5p/hsa-miR-30d-5p	hsa-miR-424-5p	hsa-miR-429
UBE2J1	0.00527093	0.445147	0.52028	13	hsa-miR-125a-5p/hsa-miR-125b-5p	hsa-miR-140-5p	hsa-miR-142-5p	hsa-miR-204-5p	hsa-miR-26a-5p	hsa-miR-296-5p	hsa-miR-302b-3p/hsa-miR-520a-3p	hsa-miR-30b-5p/hsa-miR-30c-5p/hsa-miR-30d-5p	hsa-miR-371a-5p	hsa-miR-374a-5p	hsa-miR-424-5p	hsa-miR-429	hsa-miR-448
NHLH2	0.00554475	0.445147	0.436364	9	hsa-miR-142-5p	hsa-miR-216a-5p	hsa-miR-27b-3p	hsa-miR-302b-3p/hsa-miR-520a-3p	hsa-miR-30b-5p/hsa-miR-30c-5p/hsa-miR-30d-5p	hsa-miR-381-3p	hsa-miR-494-3p	hsa-miR-92a-3p/hsa-miR-92b-3p	hsa-miR-9-5p
PPM1E	0.00554475	0.445147	0.436364	9	hsa-miR-128-3p/hsa-miR-128-3p/hsa-miR-216a-3p	hsa-miR-135a-5p	hsa-miR-141-3p/hsa-miR-200a-3p	hsa-miR-204-5p	hsa-miR-27b-3p	hsa-miR-29a-3p/hsa-miR-29b-3p	hsa-miR-30b-5p/hsa-miR-30c-5p/hsa-miR-30d-5p	hsa-miR-384	hsa-miR-424-5p
TMEM136	0.00554475	0.445147	0.436364	9	hsa-miR-125a-5p/hsa-miR-125b-5p	hsa-miR-135a-5p	hsa-miR-146a-5p	hsa-miR-155-5p	hsa-miR-205-5p	hsa-miR-29a-3p/hsa-miR-29b-3p	hsa-miR-362-5p	hsa-miR-429	hsa-miR-9-5p
ZBTB8B	0.00554475	0.445147	0.436364	9	hsa-let-7b-5p/hsa-let-7e-5p/hsa-let-7f-5p	hsa-miR-142-5p	hsa-miR-146a-5p	hsa-miR-186-5p/hsa-miR-186-5p	hsa-miR-204-5p	hsa-miR-27b-3p	hsa-miR-29a-3p/hsa-miR-29b-3p	hsa-miR-429	hsa-miR-455-5p
ANO6	0.0055795	0.445147	0.409091	8	hsa-miR-125a-5p/hsa-miR-125b-5p	hsa-miR-140-5p	hsa-miR-141-3p/hsa-miR-200a-3p	hsa-miR-186-5p/hsa-miR-186-5p	hsa-miR-27b-3p	hsa-miR-302b-3p/hsa-miR-520a-3p	hsa-miR-429	hsa-miR-9-5p
CDC25A	0.0055795	0.445147	0.409091	8	hsa-let-7b-5p/hsa-let-7e-5p/hsa-let-7f-5p	hsa-miR-141-3p/hsa-miR-200a-3p	hsa-miR-142-5p	hsa-miR-21-5p	hsa-miR-302b-3p/hsa-miR-520a-3p	hsa-miR-34a-5p/hsa-miR-34c-5p/hsa-miR-449a/hsa-miR-449b-5p	hsa-miR-371a-5p	hsa-miR-424-5p
FAM131B	0.0055795	0.445147	0.409091	8	hsa-miR-125a-5p/hsa-miR-125b-5p	hsa-miR-142-5p	hsa-miR-216b-5p	hsa-miR-29a-3p/hsa-miR-29b-3p	hsa-miR-30b-5p/hsa-miR-30c-5p/hsa-miR-30d-5p	hsa-miR-34a-5p/hsa-miR-34c-5p/hsa-miR-449a/hsa-miR-449b-5p	hsa-miR-501-3p	hsa-miR-7-5p
KIF3A	0.0055795	0.445147	0.409091	8	hsa-miR-128-3p/hsa-miR-128-3p/hsa-miR-216a-3p	hsa-miR-141-3p/hsa-miR-200a-3p	hsa-miR-155-5p	hsa-miR-186-5p/hsa-miR-186-5p	hsa-miR-27b-3p	hsa-miR-30b-5p/hsa-miR-30c-5p/hsa-miR-30d-5p	hsa-miR-381-3p	hsa-miR-455-5p
TMEM255A	0.0055795	0.445147	0.409091	8	hsa-let-7b-5p/hsa-let-7e-5p/hsa-let-7f-5p	hsa-miR-204-5p	hsa-miR-216a-5p	hsa-miR-29a-3p/hsa-miR-29b-3p	hsa-miR-34a-5p/hsa-miR-34c-5p/hsa-miR-449a/hsa-miR-449b-5p	hsa-miR-424-5p	hsa-miR-494-3p	hsa-miR-92a-3p/hsa-miR-92b-3p
SNTB2	0.00569278	0.445147	0.572727	16	hsa-miR-125a-5p/hsa-miR-125b-5p	hsa-miR-135a-5p	hsa-miR-138-5p	hsa-miR-140-5p	hsa-miR-142-5p	hsa-miR-21-5p	hsa-miR-216b-5p	hsa-miR-29a-3p/hsa-miR-29b-3p	hsa-miR-302b-3p/hsa-miR-520a-3p	hsa-miR-30b-5p/hsa-miR-30c-5p/hsa-miR-30d-5p	hsa-miR-34a-5p/hsa-miR-34c-5p/hsa-miR-449a/hsa-miR-449b-5p	hsa-miR-374a-5p	hsa-miR-429	hsa-miR-448	hsa-miR-494-3p	hsa-miR-9-5p
BFAR	0.00608898	0.445147	0.305455	5	hsa-miR-26a-5p	hsa-miR-371a-5p	hsa-miR-384	hsa-miR-424-5p	hsa-miR-425-5p
COL1A2	0.00608898	0.445147	0.305455	5	hsa-let-7b-5p/hsa-let-7e-5p/hsa-let-7f-5p	hsa-miR-26a-5p	hsa-miR-29a-3p/hsa-miR-29b-3p	hsa-miR-7-5p	hsa-miR-92a-3p/hsa-miR-92b-3p
FOXD1	0.00608898	0.445147	0.305455	5	hsa-miR-138-5p	hsa-miR-186-5p/hsa-miR-186-5p	hsa-miR-216b-5p	hsa-miR-30b-5p/hsa-miR-30c-5p/hsa-miR-30d-5p	hsa-miR-425-5p
HSDL2	0.00608898	0.445147	0.305455	5	hsa-miR-26a-5p	hsa-miR-362-5p	hsa-miR-374a-5p	hsa-miR-381-3p	hsa-miR-448
MOSPD2	0.00608898	0.445147	0.305455	5	hsa-miR-142-5p	hsa-miR-29a-3p/hsa-miR-29b-3p	hsa-miR-302b-3p/hsa-miR-520a-3p	hsa-miR-429	hsa-miR-494-3p
SAP30	0.00608898	0.445147	0.305455	5	hsa-miR-140-5p	hsa-miR-216a-5p	hsa-miR-26a-5p	hsa-miR-30b-5p/hsa-miR-30c-5p/hsa-miR-30d-5p	hsa-miR-374a-5p
SUV420H2	0.00608898	0.445147	0.305455	5	hsa-miR-125a-5p/hsa-miR-125b-5p	hsa-miR-135a-5p	hsa-miR-26a-5p	hsa-miR-29a-3p/hsa-miR-29b-3p	hsa-miR-302b-3p/hsa-miR-520a-3p
TMPPE	0.00608898	0.445147	0.305455	5	hsa-let-7b-5p/hsa-let-7e-5p/hsa-let-7f-5p	hsa-miR-26a-5p	hsa-miR-384	hsa-miR-424-5p	hsa-miR-429
ASXL3	0.00615489	0.445147	0.509091	12	hsa-miR-125a-5p/hsa-miR-125b-5p	hsa-miR-138-5p	hsa-miR-141-3p/hsa-miR-200a-3p	hsa-miR-186-5p/hsa-miR-186-5p	hsa-miR-204-5p	hsa-miR-29a-3p/hsa-miR-29b-3p	hsa-miR-302b-3p/hsa-miR-520a-3p	hsa-miR-30b-5p/hsa-miR-30c-5p/hsa-miR-30d-5p	hsa-miR-362-3p	hsa-miR-429	hsa-miR-494-3p	hsa-miR-9-5p
CALN1	0.00615489	0.445147	0.509091	12	hsa-let-7b-5p/hsa-let-7e-5p/hsa-let-7f-5p	hsa-miR-128-3p/hsa-miR-128-3p/hsa-miR-216a-3p	hsa-miR-135a-5p	hsa-miR-138-5p	hsa-miR-142-5p	hsa-miR-151a-3p	hsa-miR-296-3p	hsa-miR-34a-5p/hsa-miR-34c-5p/hsa-miR-449a/hsa-miR-449b-5p	hsa-miR-422a	hsa-miR-448	hsa-miR-7-5p	hsa-miR-92a-3p/hsa-miR-92b-3p
HSPA13	0.00615489	0.445147	0.509091	12	hsa-miR-140-5p	hsa-miR-141-3p/hsa-miR-200a-3p	hsa-miR-142-5p	hsa-miR-204-5p	hsa-miR-205-5p	hsa-miR-21-5p	hsa-miR-26a-5p	hsa-miR-362-3p	hsa-miR-381-3p	hsa-miR-429	hsa-miR-494-3p	hsa-miR-9-5p
PEAK1	0.00615489	0.445147	0.509091	12	hsa-miR-125a-5p/hsa-miR-125b-5p	hsa-miR-128-3p/hsa-miR-128-3p/hsa-miR-216a-3p	hsa-miR-141-3p/hsa-miR-200a-3p	hsa-miR-27b-3p	hsa-miR-29a-3p/hsa-miR-29b-3p	hsa-miR-302b-3p/hsa-miR-520a-3p	hsa-miR-30b-5p/hsa-miR-30c-5p/hsa-miR-30d-5p	hsa-miR-34a-5p/hsa-miR-34c-5p/hsa-miR-449a/hsa-miR-449b-5p	hsa-miR-429	hsa-miR-455-5p	hsa-miR-92a-3p/hsa-miR-92b-3p	hsa-miR-9-5p
FBXO45	0.00707294	0.445147	0.495868	11	hsa-let-7b-5p/hsa-let-7e-5p/hsa-let-7f-5p	hsa-miR-125a-5p/hsa-miR-125b-5p	hsa-miR-140-5p	hsa-miR-204-5p	hsa-miR-216b-5p	hsa-miR-27b-3p	hsa-miR-30b-5p/hsa-miR-30c-5p/hsa-miR-30d-5p	hsa-miR-362-3p	hsa-miR-362-5p	hsa-miR-381-3p	hsa-miR-448
FOXN3	0.00707294	0.445147	0.495868	11	hsa-miR-125a-5p/hsa-miR-125b-5p	hsa-miR-128-3p/hsa-miR-128-3p/hsa-miR-216a-3p	hsa-miR-135a-5p	hsa-miR-141-3p/hsa-miR-200a-3p	hsa-miR-27b-3p	hsa-miR-29a-3p/hsa-miR-29b-3p	hsa-miR-34a-5p/hsa-miR-34c-5p/hsa-miR-449a/hsa-miR-449b-5p	hsa-miR-455-5p	hsa-miR-7-5p	hsa-miR-92a-3p/hsa-miR-92b-3p	hsa-miR-9-5p
LYSMD3	0.00707294	0.445147	0.495868	11	hsa-miR-128-3p/hsa-miR-128-3p/hsa-miR-216a-3p	hsa-miR-140-5p	hsa-miR-141-3p/hsa-miR-200a-3p	hsa-miR-205-5p	hsa-miR-27b-3p	hsa-miR-302b-3p/hsa-miR-520a-3p	hsa-miR-30b-5p/hsa-miR-30c-5p/hsa-miR-30d-5p	hsa-miR-381-3p	hsa-miR-429	hsa-miR-494-3p	hsa-miR-501-3p
MARCH6	0.00707294	0.445147	0.495868	11	hsa-miR-141-3p/hsa-miR-200a-3p	hsa-miR-142-5p	hsa-miR-146a-5p	hsa-miR-21-5p	hsa-miR-27b-3p	hsa-miR-28-3p	hsa-miR-30b-5p/hsa-miR-30c-5p/hsa-miR-30d-5p	hsa-miR-381-3p	hsa-miR-422a	hsa-miR-429	hsa-miR-9-5p
YPEL2	0.00707294	0.445147	0.495868	11	hsa-let-7b-5p/hsa-let-7e-5p/hsa-let-7f-5p	hsa-miR-128-3p/hsa-miR-128-3p/hsa-miR-216a-3p	hsa-miR-204-5p	hsa-miR-27b-3p	hsa-miR-29a-3p/hsa-miR-29b-3p	hsa-miR-302b-3p/hsa-miR-520a-3p	hsa-miR-30b-5p/hsa-miR-30c-5p/hsa-miR-30d-5p	hsa-miR-371a-5p	hsa-miR-425-5p	hsa-miR-429	hsa-miR-9-5p
ARIH1	0.00739992	0.445147	0.537063	13	hsa-miR-135a-5p	hsa-miR-186-5p/hsa-miR-186-5p	hsa-miR-27b-3p	hsa-miR-296-3p	hsa-miR-302b-3p/hsa-miR-520a-3p	hsa-miR-30b-5p/hsa-miR-30c-5p/hsa-miR-30d-5p	hsa-miR-381-3p	hsa-miR-424-5p	hsa-miR-425-5p	hsa-miR-429	hsa-miR-448	hsa-miR-501-3p	hsa-miR-7-5p
NUCKS1	0.00739992	0.445147	0.537063	13	hsa-miR-135a-5p	hsa-miR-140-5p	hsa-miR-141-3p/hsa-miR-200a-3p	hsa-miR-142-5p	hsa-miR-146a-5p	hsa-miR-186-5p/hsa-miR-186-5p	hsa-miR-216b-5p	hsa-miR-29a-3p/hsa-miR-29b-3p	hsa-miR-30b-5p/hsa-miR-30c-5p/hsa-miR-30d-5p	hsa-miR-381-3p	hsa-miR-424-5p	hsa-miR-7-5p	hsa-miR-92a-3p/hsa-miR-92b-3p
KLF3	0.00758648	0.445147	0.586364	16	hsa-miR-125a-5p/hsa-miR-125b-5p	hsa-miR-128-3p/hsa-miR-128-3p/hsa-miR-216a-3p	hsa-miR-135a-5p	hsa-miR-141-3p/hsa-miR-200a-3p	hsa-miR-155-5p	hsa-miR-204-5p	hsa-miR-205-5p	hsa-miR-21-5p	hsa-miR-27b-3p	hsa-miR-302b-3p/hsa-miR-520a-3p	hsa-miR-374a-5p	hsa-miR-381-3p	hsa-miR-425-5p	hsa-miR-429	hsa-miR-448	hsa-miR-92a-3p/hsa-miR-92b-3p
ACTR3	0.00796999	0.445147	0.48	10	hsa-miR-142-5p	hsa-miR-186-5p/hsa-miR-186-5p	hsa-miR-26a-5p	hsa-miR-362-5p	hsa-miR-381-3p	hsa-miR-425-5p	hsa-miR-429	hsa-miR-494-3p	hsa-miR-92a-3p/hsa-miR-92b-3p	hsa-miR-9-5p
BTG2	0.00796999	0.445147	0.48	10	hsa-let-7b-5p/hsa-let-7e-5p/hsa-let-7f-5p	hsa-miR-125a-5p/hsa-miR-125b-5p	hsa-miR-128-3p/hsa-miR-128-3p/hsa-miR-216a-3p	hsa-miR-146a-5p	hsa-miR-21-5p	hsa-miR-27b-3p	hsa-miR-29a-3p/hsa-miR-29b-3p	hsa-miR-424-5p	hsa-miR-92a-3p/hsa-miR-92b-3p	hsa-miR-9-5p
CALU	0.00796999	0.445147	0.48	10	hsa-let-7b-5p/hsa-let-7e-5p/hsa-let-7f-5p	hsa-miR-140-5p	hsa-miR-141-3p/hsa-miR-200a-3p	hsa-miR-205-5p	hsa-miR-29a-3p/hsa-miR-29b-3p	hsa-miR-30b-5p/hsa-miR-30c-5p/hsa-miR-30d-5p	hsa-miR-371a-5p	hsa-miR-424-5p	hsa-miR-429	hsa-miR-7-5p
ELF2	0.00796999	0.445147	0.48	10	hsa-miR-138-5p	hsa-miR-141-3p/hsa-miR-200a-3p	hsa-miR-204-5p	hsa-miR-21-5p	hsa-miR-28-3p	hsa-miR-29a-3p/hsa-miR-29b-3p	hsa-miR-381-3p	hsa-miR-429	hsa-miR-448	hsa-miR-494-3p
FAM178A	0.00796999	0.445147	0.48	10	hsa-let-7b-5p/hsa-let-7e-5p/hsa-let-7f-5p	hsa-miR-138-5p	hsa-miR-140-5p	hsa-miR-186-5p/hsa-miR-186-5p	hsa-miR-204-5p	hsa-miR-216b-5p	hsa-miR-30b-5p/hsa-miR-30c-5p/hsa-miR-30d-5p	hsa-miR-362-3p	hsa-miR-371a-5p	hsa-miR-429
JOSD1	0.00796999	0.445147	0.48	10	hsa-let-7b-5p/hsa-let-7e-5p/hsa-let-7f-5p	hsa-miR-135a-5p	hsa-miR-138-5p	hsa-miR-296-3p	hsa-miR-29a-3p/hsa-miR-29b-3p	hsa-miR-302b-3p/hsa-miR-520a-3p	hsa-miR-30b-5p/hsa-miR-30c-5p/hsa-miR-30d-5p	hsa-miR-424-5p	hsa-miR-448	hsa-miR-92a-3p/hsa-miR-92b-3p
ARCN1	0.00839474	0.445147	0.363636	6	hsa-miR-125a-5p/hsa-miR-125b-5p	hsa-miR-186-5p/hsa-miR-186-5p	hsa-miR-204-5p	hsa-miR-374a-5p	hsa-miR-494-3p	hsa-miR-9-5p
CHST2	0.00839474	0.445147	0.363636	6	hsa-miR-186-5p/hsa-miR-186-5p	hsa-miR-26a-5p	hsa-miR-27b-3p	hsa-miR-30b-5p/hsa-miR-30c-5p/hsa-miR-30d-5p	hsa-miR-374a-5p	hsa-miR-429
EAF1	0.00839474	0.445147	0.363636	6	hsa-miR-125a-5p/hsa-miR-125b-5p	hsa-miR-140-5p	hsa-miR-186-5p/hsa-miR-186-5p	hsa-miR-204-5p	hsa-miR-26a-5p	hsa-miR-30b-5p/hsa-miR-30c-5p/hsa-miR-30d-5p
FAM169A	0.00839474	0.445147	0.363636	6	hsa-miR-138-5p	hsa-miR-146a-5p	hsa-miR-26a-5p	hsa-miR-302b-3p/hsa-miR-520a-3p	hsa-miR-374a-5p	hsa-miR-9-5p
HOOK1	0.00839474	0.445147	0.363636	6	hsa-let-7b-5p/hsa-let-7e-5p/hsa-let-7f-5p	hsa-miR-155-5p	hsa-miR-186-5p/hsa-miR-186-5p	hsa-miR-216a-5p	hsa-miR-26a-5p	hsa-miR-429
HOXA10	0.00839474	0.445147	0.363636	6	hsa-miR-128-3p/hsa-miR-128-3p/hsa-miR-216a-3p	hsa-miR-135a-5p	hsa-miR-142-5p	hsa-miR-27b-3p	hsa-miR-374a-5p	hsa-miR-424-5p
KLHL31	0.00839474	0.445147	0.363636	6	hsa-let-7b-5p/hsa-let-7e-5p/hsa-let-7f-5p	hsa-miR-125a-5p/hsa-miR-125b-5p	hsa-miR-128-3p/hsa-miR-128-3p/hsa-miR-216a-3p	hsa-miR-186-5p/hsa-miR-186-5p	hsa-miR-27b-3p	hsa-miR-92a-3p/hsa-miR-92b-3p
LATS2	0.00839474	0.445147	0.363636	6	hsa-miR-135a-5p	hsa-miR-302b-3p/hsa-miR-520a-3p	hsa-miR-30b-5p/hsa-miR-30c-5p/hsa-miR-30d-5p	hsa-miR-424-5p	hsa-miR-429	hsa-miR-92a-3p/hsa-miR-92b-3p
MESDC1	0.00839474	0.445147	0.363636	6	hsa-let-7b-5p/hsa-let-7e-5p/hsa-let-7f-5p	hsa-miR-128-3p/hsa-miR-128-3p/hsa-miR-216a-3p	hsa-miR-27b-3p	hsa-miR-494-3p	hsa-miR-7-5p	hsa-miR-9-5p
MYT1	0.00839474	0.445147	0.363636	6	hsa-miR-125a-5p/hsa-miR-125b-5p	hsa-miR-128-3p/hsa-miR-128-3p/hsa-miR-216a-3p	hsa-miR-146a-5p	hsa-miR-186-5p/hsa-miR-186-5p	hsa-miR-27b-3p	hsa-miR-429
PELI1	0.00839474	0.445147	0.363636	6	hsa-miR-135a-5p	hsa-miR-155-5p	hsa-miR-21-5p	hsa-miR-30b-5p/hsa-miR-30c-5p/hsa-miR-30d-5p	hsa-miR-374a-5p	hsa-miR-448
RIT1	0.00839474	0.445147	0.363636	6	hsa-miR-125a-5p/hsa-miR-125b-5p	hsa-miR-27b-3p	hsa-miR-29a-3p/hsa-miR-29b-3p	hsa-miR-302b-3p/hsa-miR-520a-3p	hsa-miR-381-3p	hsa-miR-422a
SLCO5A1	0.00839474	0.445147	0.363636	6	hsa-let-7b-5p/hsa-let-7e-5p/hsa-let-7f-5p	hsa-miR-135a-5p	hsa-miR-26a-5p	hsa-miR-27b-3p	hsa-miR-29a-3p/hsa-miR-29b-3p	hsa-miR-448
SYDE1	0.00839474	0.445147	0.363636	6	hsa-miR-128-3p/hsa-miR-128-3p/hsa-miR-216a-3p	hsa-miR-27b-3p	hsa-miR-302b-3p/hsa-miR-520a-3p	hsa-miR-424-5p	hsa-miR-429	hsa-miR-448
SYT10	0.00839474	0.445147	0.363636	6	hsa-miR-155-5p	hsa-miR-186-5p/hsa-miR-186-5p	hsa-miR-26a-5p	hsa-miR-424-5p	hsa-miR-448	hsa-miR-9-5p
TRIM23	0.00839474	0.445147	0.363636	6	hsa-miR-128-3p/hsa-miR-128-3p/hsa-miR-216a-3p	hsa-miR-135a-5p	hsa-miR-141-3p/hsa-miR-200a-3p	hsa-miR-155-5p	hsa-miR-27b-3p	hsa-miR-30b-5p/hsa-miR-30c-5p/hsa-miR-30d-5p
WWP1	0.00839474	0.445147	0.363636	6	hsa-miR-142-5p	hsa-miR-21-5p	hsa-miR-30b-5p/hsa-miR-30c-5p/hsa-miR-30d-5p	hsa-miR-424-5p	hsa-miR-448	hsa-miR-7-5p
ZSWIM4	0.00839474	0.445147	0.363636	6	hsa-let-7b-5p/hsa-let-7e-5p/hsa-let-7f-5p	hsa-miR-125a-5p/hsa-miR-125b-5p	hsa-miR-135a-5p	hsa-miR-205-5p	hsa-miR-381-3p	hsa-miR-429
BNC1	0.00857514	0.445147	0.272727	4	hsa-miR-146a-5p	hsa-miR-302b-3p/hsa-miR-520a-3p	hsa-miR-30b-5p/hsa-miR-30c-5p/hsa-miR-30d-5p	hsa-miR-381-3p
C10orf76	0.00857514	0.445147	0.272727	4	hsa-miR-146a-5p	hsa-miR-216b-5p	hsa-miR-30b-5p/hsa-miR-30c-5p/hsa-miR-30d-5p	hsa-miR-424-5p
CEP76	0.00857514	0.445147	0.272727	4	hsa-miR-30b-5p/hsa-miR-30c-5p/hsa-miR-30d-5p	hsa-miR-381-3p	hsa-miR-384	hsa-miR-494-3p
COL11A1	0.00857514	0.445147	0.272727	4	hsa-let-7b-5p/hsa-let-7e-5p/hsa-let-7f-5p	hsa-miR-26a-5p	hsa-miR-29a-3p/hsa-miR-29b-3p	hsa-miR-381-3p
COL3A1	0.00857514	0.445147	0.272727	4	hsa-let-7b-5p/hsa-let-7e-5p/hsa-let-7f-5p	hsa-miR-128-3p/hsa-miR-128-3p/hsa-miR-216a-3p	hsa-miR-29a-3p/hsa-miR-29b-3p	hsa-miR-381-3p
DVL2	0.00857514	0.445147	0.272727	4	hsa-miR-128-3p/hsa-miR-128-3p/hsa-miR-216a-3p	hsa-miR-138-5p	hsa-miR-27b-3p	hsa-miR-381-3p
GPR125	0.00857514	0.445147	0.272727	4	hsa-miR-128-3p/hsa-miR-128-3p/hsa-miR-216a-3p	hsa-miR-27b-3p	hsa-miR-30b-5p/hsa-miR-30c-5p/hsa-miR-30d-5p	hsa-miR-381-3p
LFNG	0.00857514	0.445147	0.272727	4	hsa-miR-125a-5p/hsa-miR-125b-5p	hsa-miR-146a-5p	hsa-miR-384	hsa-miR-429
RCOR3	0.00857514	0.445147	0.272727	4	hsa-miR-128-3p/hsa-miR-128-3p/hsa-miR-216a-3p	hsa-miR-141-3p/hsa-miR-200a-3p	hsa-miR-27b-3p	hsa-miR-424-5p
RFESD	0.00857514	0.445147	0.272727	4	hsa-miR-151a-3p	hsa-miR-296-3p	hsa-miR-29a-3p/hsa-miR-29b-3p	hsa-miR-374a-5p
RUFY3	0.00857514	0.445147	0.272727	4	hsa-let-7b-5p/hsa-let-7e-5p/hsa-let-7f-5p	hsa-miR-125a-5p/hsa-miR-125b-5p	hsa-miR-128-3p/hsa-miR-128-3p/hsa-miR-216a-3p	hsa-miR-27b-3p
SEH1L	0.00857514	0.445147	0.272727	4	hsa-miR-138-5p	hsa-miR-205-5p	hsa-miR-34a-5p/hsa-miR-34c-5p/hsa-miR-449a/hsa-miR-449b-5p	hsa-miR-424-5p
TMTC2	0.00857514	0.445147	0.272727	4	hsa-miR-125a-5p/hsa-miR-125b-5p	hsa-miR-128-3p/hsa-miR-128-3p/hsa-miR-216a-3p	hsa-miR-27b-3p	hsa-miR-302b-3p/hsa-miR-520a-3p
TTYH2	0.00857514	0.445147	0.272727	4	hsa-miR-140-5p	hsa-miR-141-3p/hsa-miR-200a-3p	hsa-miR-29a-3p/hsa-miR-29b-3p	hsa-miR-9-5p
HAS2	0.00874068	0.445147	0.527273	12	hsa-let-7b-5p/hsa-let-7e-5p/hsa-let-7f-5p	hsa-miR-186-5p/hsa-miR-186-5p	hsa-miR-204-5p	hsa-miR-26a-5p	hsa-miR-27b-3p	hsa-miR-29a-3p/hsa-miR-29b-3p	hsa-miR-424-5p	hsa-miR-429	hsa-miR-455-5p	hsa-miR-494-3p	hsa-miR-92a-3p/hsa-miR-92b-3p	hsa-miR-9-5p
PPIP5K2	0.00875328	0.445147	0.460606	9	hsa-miR-142-5p	hsa-miR-186-5p/hsa-miR-186-5p	hsa-miR-216b-5p	hsa-miR-29a-3p/hsa-miR-29b-3p	hsa-miR-30b-5p/hsa-miR-30c-5p/hsa-miR-30d-5p	hsa-miR-424-5p	hsa-miR-455-5p	hsa-miR-92a-3p/hsa-miR-92b-3p	hsa-miR-9-5p
SLC16A7	0.00875328	0.445147	0.460606	9	hsa-miR-141-3p/hsa-miR-200a-3p	hsa-miR-216a-5p	hsa-miR-216b-5p	hsa-miR-27b-3p	hsa-miR-29a-3p/hsa-miR-29b-3p	hsa-miR-362-5p	hsa-miR-371a-5p	hsa-miR-448	hsa-miR-7-5p
DTX4	0.00927083	0.445147	0.436364	8	hsa-let-7b-5p/hsa-let-7e-5p/hsa-let-7f-5p	hsa-miR-125a-5p/hsa-miR-125b-5p	hsa-miR-128-3p/hsa-miR-128-3p/hsa-miR-216a-3p	hsa-miR-138-5p	hsa-miR-204-5p	hsa-miR-27b-3p	hsa-miR-29a-3p/hsa-miR-29b-3p	hsa-miR-448
GREB1L	0.00927083	0.445147	0.436364	8	hsa-let-7b-5p/hsa-let-7e-5p/hsa-let-7f-5p	hsa-miR-125a-5p/hsa-miR-125b-5p	hsa-miR-128-3p/hsa-miR-128-3p/hsa-miR-216a-3p	hsa-miR-141-3p/hsa-miR-200a-3p	hsa-miR-26a-5p	hsa-miR-30b-5p/hsa-miR-30c-5p/hsa-miR-30d-5p	hsa-miR-429	hsa-miR-92a-3p/hsa-miR-92b-3p
KREMEN1	0.00927083	0.445147	0.436364	8	hsa-let-7b-5p/hsa-let-7e-5p/hsa-let-7f-5p	hsa-miR-138-5p	hsa-miR-204-5p	hsa-miR-302b-3p/hsa-miR-520a-3p	hsa-miR-30b-5p/hsa-miR-30c-5p/hsa-miR-30d-5p	hsa-miR-34a-5p/hsa-miR-34c-5p/hsa-miR-449a/hsa-miR-449b-5p	hsa-miR-371a-5p	hsa-miR-448
MICALCL	0.00927083	0.445147	0.436364	8	hsa-let-7b-5p/hsa-let-7e-5p/hsa-let-7f-5p	hsa-miR-128-3p/hsa-miR-128-3p/hsa-miR-216a-3p	hsa-miR-141-3p/hsa-miR-200a-3p	hsa-miR-21-5p	hsa-miR-216a-5p	hsa-miR-216b-5p	hsa-miR-27b-3p	hsa-miR-374a-5p
SEC31B	0.00927083	0.445147	0.436364	8	hsa-let-7b-5p/hsa-let-7e-5p/hsa-let-7f-5p	hsa-miR-186-5p/hsa-miR-186-5p	hsa-miR-204-5p	hsa-miR-27b-3p	hsa-miR-296-5p	hsa-miR-424-5p	hsa-miR-429	hsa-miR-92a-3p/hsa-miR-92b-3p
DIRAS1	0.00927828	0.445147	0.405195	7	hsa-miR-125a-5p/hsa-miR-125b-5p	hsa-miR-128-3p/hsa-miR-128-3p/hsa-miR-216a-3p	hsa-miR-27b-3p	hsa-miR-296-5p	hsa-miR-29a-3p/hsa-miR-29b-3p	hsa-miR-7-5p	hsa-miR-92a-3p/hsa-miR-92b-3p
GRK5	0.00927828	0.445147	0.405195	7	hsa-miR-125a-5p/hsa-miR-125b-5p	hsa-miR-135a-5p	hsa-miR-146a-5p	hsa-miR-30b-5p/hsa-miR-30c-5p/hsa-miR-30d-5p	hsa-miR-381-3p	hsa-miR-429	hsa-miR-92a-3p/hsa-miR-92b-3p
HNF4G	0.00927828	0.445147	0.405195	7	hsa-miR-125a-5p/hsa-miR-125b-5p	hsa-miR-128-3p/hsa-miR-128-3p/hsa-miR-216a-3p	hsa-miR-216a-5p	hsa-miR-216b-5p	hsa-miR-27b-3p	hsa-miR-29a-3p/hsa-miR-29b-3p	hsa-miR-34a-5p/hsa-miR-34c-5p/hsa-miR-449a/hsa-miR-449b-5p
KIAA0408	0.00927828	0.445147	0.405195	7	hsa-miR-141-3p/hsa-miR-200a-3p	hsa-miR-186-5p/hsa-miR-186-5p	hsa-miR-28-3p	hsa-miR-30b-5p/hsa-miR-30c-5p/hsa-miR-30d-5p	hsa-miR-374a-5p	hsa-miR-381-3p	hsa-miR-501-3p
SLC2A3	0.00927828	0.445147	0.405195	7	hsa-miR-146a-5p	hsa-miR-26a-5p	hsa-miR-29a-3p/hsa-miR-29b-3p	hsa-miR-422a	hsa-miR-424-5p	hsa-miR-429	hsa-miR-92a-3p/hsa-miR-92b-3p
SLC30A10	0.00927828	0.445147	0.405195	7	hsa-miR-204-5p	hsa-miR-21-5p	hsa-miR-29a-3p/hsa-miR-29b-3p	hsa-miR-30b-5p/hsa-miR-30c-5p/hsa-miR-30d-5p	hsa-miR-374a-5p	hsa-miR-429	hsa-miR-92a-3p/hsa-miR-92b-3p
TCF21	0.00927828	0.445147	0.405195	7	hsa-miR-141-3p/hsa-miR-200a-3p	hsa-miR-142-5p	hsa-miR-146a-5p	hsa-miR-186-5p/hsa-miR-186-5p	hsa-miR-30b-5p/hsa-miR-30c-5p/hsa-miR-30d-5p	hsa-miR-374a-5p	hsa-miR-92a-3p/hsa-miR-92b-3p
TFAP2A	0.00927828	0.445147	0.405195	7	hsa-miR-135a-5p	hsa-miR-141-3p/hsa-miR-200a-3p	hsa-miR-186-5p/hsa-miR-186-5p	hsa-miR-204-5p	hsa-miR-26a-5p	hsa-miR-429	hsa-miR-92a-3p/hsa-miR-92b-3p
TMEM189	0.00927828	0.445147	0.405195	7	hsa-miR-128-3p/hsa-miR-128-3p/hsa-miR-216a-3p	hsa-miR-138-5p	hsa-miR-140-5p	hsa-miR-27b-3p	hsa-miR-424-5p	hsa-miR-429	hsa-miR-455-5p
TMEM189-UBE2V1	0.00927828	0.445147	0.405195	7	hsa-miR-128-3p/hsa-miR-128-3p/hsa-miR-216a-3p	hsa-miR-138-5p	hsa-miR-140-5p	hsa-miR-27b-3p	hsa-miR-424-5p	hsa-miR-429	hsa-miR-455-5p
UBE2V1	0.00927828	0.445147	0.405195	7	hsa-miR-128-3p/hsa-miR-128-3p/hsa-miR-216a-3p	hsa-miR-138-5p	hsa-miR-140-5p	hsa-miR-27b-3p	hsa-miR-424-5p	hsa-miR-429	hsa-miR-455-5p
WBP1L	0.00927828	0.445147	0.405195	7	hsa-miR-128-3p/hsa-miR-128-3p/hsa-miR-216a-3p	hsa-miR-140-5p	hsa-miR-155-5p	hsa-miR-27b-3p	hsa-miR-29a-3p/hsa-miR-29b-3p	hsa-miR-30b-5p/hsa-miR-30c-5p/hsa-miR-30d-5p	hsa-miR-429
MBD5	0.00931389	0.445147	0.581818	15	hsa-miR-128-3p/hsa-miR-128-3p/hsa-miR-216a-3p	hsa-miR-141-3p/hsa-miR-200a-3p	hsa-miR-142-5p	hsa-miR-155-5p	hsa-miR-186-5p/hsa-miR-186-5p	hsa-miR-204-5p	hsa-miR-216b-5p	hsa-miR-27b-3p	hsa-miR-29a-3p/hsa-miR-29b-3p	hsa-miR-362-3p	hsa-miR-374a-5p	hsa-miR-384	hsa-miR-429	hsa-miR-494-3p	hsa-miR-9-5p
ACOT11	0.00988038	0.445147	0.218182	3	hsa-miR-128-3p/hsa-miR-128-3p/hsa-miR-216a-3p	hsa-miR-27b-3p	hsa-miR-34a-5p/hsa-miR-34c-5p/hsa-miR-449a/hsa-miR-449b-5p
ADORA2B	0.00988038	0.445147	0.218182	3	hsa-miR-128-3p/hsa-miR-128-3p/hsa-miR-216a-3p	hsa-miR-27b-3p	hsa-miR-374a-5p
ATP10B	0.00988038	0.445147	0.218182	3	hsa-miR-128-3p/hsa-miR-128-3p/hsa-miR-216a-3p	hsa-miR-27b-3p	hsa-miR-424-5p
AZGP1	0.00988038	0.445147	0.218182	3	hsa-miR-138-5p	hsa-miR-302b-3p/hsa-miR-520a-3p	hsa-miR-423-5p
C1orf173	0.00988038	0.445147	0.218182	3	hsa-miR-27b-3p	hsa-miR-302b-3p/hsa-miR-520a-3p	hsa-miR-9-5p
COL15A1	0.00988038	0.445147	0.218182	3	hsa-let-7b-5p/hsa-let-7e-5p/hsa-let-7f-5p	hsa-miR-29a-3p/hsa-miR-29b-3p	hsa-miR-9-5p
COX5A	0.00988038	0.445147	0.218182	3	hsa-miR-204-5p	hsa-miR-26a-5p	hsa-miR-362-5p
EEPD1	0.00988038	0.445147	0.218182	3	hsa-miR-128-3p/hsa-miR-128-3p/hsa-miR-216a-3p	hsa-miR-27b-3p	hsa-miR-302b-3p/hsa-miR-520a-3p
EIF2B5	0.00988038	0.445147	0.218182	3	hsa-miR-125a-5p/hsa-miR-125b-5p	hsa-miR-424-5p	hsa-miR-429
GTF2A2	0.00988038	0.445147	0.218182	3	hsa-miR-128-3p/hsa-miR-128-3p/hsa-miR-216a-3p	hsa-miR-186-5p/hsa-miR-186-5p	hsa-miR-374a-5p
HINT1	0.00988038	0.445147	0.218182	3	hsa-miR-135a-5p	hsa-miR-216b-5p	hsa-miR-26a-5p
MMP11	0.00988038	0.445147	0.218182	3	hsa-let-7b-5p/hsa-let-7e-5p/hsa-let-7f-5p	hsa-miR-125a-5p/hsa-miR-125b-5p	hsa-miR-135a-5p
MSTN	0.00988038	0.445147	0.218182	3	hsa-miR-26a-5p	hsa-miR-27b-3p	hsa-miR-29a-3p/hsa-miR-29b-3p
NPL	0.00988038	0.445147	0.218182	3	hsa-miR-125a-5p/hsa-miR-125b-5p	hsa-miR-140-5p	hsa-miR-151a-3p
OLR1	0.00988038	0.445147	0.218182	3	hsa-let-7b-5p/hsa-let-7e-5p/hsa-let-7f-5p	hsa-miR-21-5p	hsa-miR-501-3p
PCM1	0.00988038	0.445147	0.218182	3	hsa-miR-128-3p/hsa-miR-128-3p/hsa-miR-216a-3p	hsa-miR-141-3p/hsa-miR-200a-3p	hsa-miR-424-5p
PPP2R2B	0.00988038	0.445147	0.218182	3	hsa-miR-141-3p/hsa-miR-200a-3p	hsa-miR-26a-5p	hsa-miR-494-3p
RNF166	0.00988038	0.445147	0.218182	3	hsa-miR-135a-5p	hsa-miR-384	hsa-miR-92a-3p/hsa-miR-92b-3p
SHPRH	0.00988038	0.445147	0.218182	3	hsa-miR-186-5p/hsa-miR-186-5p	hsa-miR-29a-3p/hsa-miR-29b-3p	hsa-miR-501-3p
SLC35F4	0.00988038	0.445147	0.218182	3	hsa-miR-27b-3p	hsa-miR-30b-5p/hsa-miR-30c-5p/hsa-miR-30d-5p	hsa-miR-429
SSSCA1	0.00988038	0.445147	0.218182	3	hsa-miR-128-3p/hsa-miR-128-3p/hsa-miR-216a-3p	hsa-miR-138-5p	hsa-miR-27b-3p
STK32B	0.00988038	0.445147	0.218182	3	hsa-miR-128-3p/hsa-miR-128-3p/hsa-miR-216a-3p	hsa-miR-27b-3p	hsa-miR-423-5p
TICAM2	0.00988038	0.445147	0.218182	3	hsa-miR-186-5p/hsa-miR-186-5p	hsa-miR-204-5p	hsa-miR-384
TRPC6	0.00988038	0.445147	0.218182	3	hsa-miR-135a-5p	hsa-miR-26a-5p	hsa-miR-29a-3p/hsa-miR-29b-3p
PRKCA	0.0101954	0.457109	0.515702	11	hsa-miR-142-5p	hsa-miR-186-5p/hsa-miR-186-5p	hsa-miR-205-5p	hsa-miR-216a-5p	hsa-miR-216b-5p	hsa-miR-296-3p	hsa-miR-362-3p	hsa-miR-362-5p	hsa-miR-374a-5p	hsa-miR-429	hsa-miR-9-5p
RORA	0.0108343	0.48341	0.643062	19	hsa-miR-125a-5p/hsa-miR-125b-5p	hsa-miR-128-3p/hsa-miR-128-3p/hsa-miR-216a-3p	hsa-miR-135a-5p	hsa-miR-141-3p/hsa-miR-200a-3p	hsa-miR-142-5p	hsa-miR-155-5p	hsa-miR-205-5p	hsa-miR-216b-5p	hsa-miR-26a-5p	hsa-miR-27b-3p	hsa-miR-29a-3p/hsa-miR-29b-3p	hsa-miR-302b-3p/hsa-miR-520a-3p	hsa-miR-30b-5p/hsa-miR-30c-5p/hsa-miR-30d-5p	hsa-miR-34a-5p/hsa-miR-34c-5p/hsa-miR-449a/hsa-miR-449b-5p	hsa-miR-374a-5p	hsa-miR-424-5p	hsa-miR-494-3p	hsa-miR-92a-3p/hsa-miR-92b-3p	hsa-miR-9-5p
SMAD2	0.0113451	0.492897	0.576623	14	hsa-let-7b-5p/hsa-let-7e-5p/hsa-let-7f-5p	hsa-miR-125a-5p/hsa-miR-125b-5p	hsa-miR-128-3p/hsa-miR-128-3p/hsa-miR-216a-3p	hsa-miR-135a-5p	hsa-miR-140-5p	hsa-miR-142-5p	hsa-miR-155-5p	hsa-miR-186-5p/hsa-miR-186-5p	hsa-miR-27b-3p	hsa-miR-302b-3p/hsa-miR-520a-3p	hsa-miR-30b-5p/hsa-miR-30c-5p/hsa-miR-30d-5p	hsa-miR-362-3p	hsa-miR-425-5p	hsa-miR-429
LIN28A	0.0117176	0.492897	0.501818	10	hsa-let-7b-5p/hsa-let-7e-5p/hsa-let-7f-5p	hsa-miR-125a-5p/hsa-miR-125b-5p	hsa-miR-128-3p/hsa-miR-128-3p/hsa-miR-216a-3p	hsa-miR-146a-5p	hsa-miR-204-5p	hsa-miR-30b-5p/hsa-miR-30c-5p/hsa-miR-30d-5p	hsa-miR-34a-5p/hsa-miR-34c-5p/hsa-miR-449a/hsa-miR-449b-5p	hsa-miR-424-5p	hsa-miR-92a-3p/hsa-miR-92b-3p	hsa-miR-9-5p
OTUD3	0.0117176	0.492897	0.501818	10	hsa-let-7b-5p/hsa-let-7e-5p/hsa-let-7f-5p	hsa-miR-135a-5p	hsa-miR-138-5p	hsa-miR-141-3p/hsa-miR-200a-3p	hsa-miR-142-5p	hsa-miR-34a-5p/hsa-miR-34c-5p/hsa-miR-449a/hsa-miR-449b-5p	hsa-miR-381-3p	hsa-miR-494-3p	hsa-miR-92a-3p/hsa-miR-92b-3p	hsa-miR-9-5p
RAB22A	0.0117176	0.492897	0.501818	10	hsa-let-7b-5p/hsa-let-7e-5p/hsa-let-7f-5p	hsa-miR-125a-5p/hsa-miR-125b-5p	hsa-miR-138-5p	hsa-miR-142-5p	hsa-miR-204-5p	hsa-miR-21-5p	hsa-miR-302b-3p/hsa-miR-520a-3p	hsa-miR-30b-5p/hsa-miR-30c-5p/hsa-miR-30d-5p	hsa-miR-374a-5p	hsa-miR-384
STK38L	0.0117176	0.492897	0.501818	10	hsa-miR-128-3p/hsa-miR-128-3p/hsa-miR-216a-3p	hsa-miR-135a-5p	hsa-miR-142-5p	hsa-miR-29a-3p/hsa-miR-29b-3p	hsa-miR-302b-3p/hsa-miR-520a-3p	hsa-miR-30b-5p/hsa-miR-30c-5p/hsa-miR-30d-5p	hsa-miR-34a-5p/hsa-miR-34c-5p/hsa-miR-449a/hsa-miR-449b-5p	hsa-miR-374a-5p	hsa-miR-381-3p	hsa-miR-9-5p
TSC1	0.0117176	0.492897	0.501818	10	hsa-let-7b-5p/hsa-let-7e-5p/hsa-let-7f-5p	hsa-miR-128-3p/hsa-miR-128-3p/hsa-miR-216a-3p	hsa-miR-141-3p/hsa-miR-200a-3p	hsa-miR-27b-3p	hsa-miR-28-3p	hsa-miR-30b-5p/hsa-miR-30c-5p/hsa-miR-30d-5p	hsa-miR-384	hsa-miR-424-5p	hsa-miR-451a	hsa-miR-92a-3p/hsa-miR-92b-3p
VASH2	0.0117176	0.492897	0.501818	10	hsa-let-7b-5p/hsa-let-7e-5p/hsa-let-7f-5p	hsa-miR-128-3p/hsa-miR-128-3p/hsa-miR-216a-3p	hsa-miR-142-5p	hsa-miR-21-5p	hsa-miR-27b-3p	hsa-miR-29a-3p/hsa-miR-29b-3p	hsa-miR-381-3p	hsa-miR-429	hsa-miR-448	hsa-miR-494-3p
VCL	0.0117176	0.492897	0.501818	10	hsa-miR-128-3p/hsa-miR-128-3p/hsa-miR-216a-3p	hsa-miR-142-5p	hsa-miR-21-5p	hsa-miR-29a-3p/hsa-miR-29b-3p	hsa-miR-34a-5p/hsa-miR-34c-5p/hsa-miR-449a/hsa-miR-449b-5p	hsa-miR-381-3p	hsa-miR-448	hsa-miR-7-5p	hsa-miR-92a-3p/hsa-miR-92b-3p	hsa-miR-9-5p
ZBTB39	0.0117176	0.492897	0.501818	10	hsa-let-7b-5p/hsa-let-7e-5p/hsa-let-7f-5p	hsa-miR-128-3p/hsa-miR-128-3p/hsa-miR-216a-3p	hsa-miR-155-5p	hsa-miR-186-5p/hsa-miR-186-5p	hsa-miR-27b-3p	hsa-miR-30b-5p/hsa-miR-30c-5p/hsa-miR-30d-5p	hsa-miR-362-3p	hsa-miR-381-3p	hsa-miR-424-5p	hsa-miR-9-5p
HCFC2	0.0121215	0.492897	0.545455	12	hsa-let-7b-5p/hsa-let-7e-5p/hsa-let-7f-5p	hsa-miR-155-5p	hsa-miR-302b-3p/hsa-miR-520a-3p	hsa-miR-30b-5p/hsa-miR-30c-5p/hsa-miR-30d-5p	hsa-miR-34a-5p/hsa-miR-34c-5p/hsa-miR-449a/hsa-miR-449b-5p	hsa-miR-381-3p	hsa-miR-424-5p	hsa-miR-429	hsa-miR-448	hsa-miR-455-5p	hsa-miR-494-3p	hsa-miR-9-5p
RNF217	0.0121215	0.492897	0.545455	12	hsa-let-7b-5p/hsa-let-7e-5p/hsa-let-7f-5p	hsa-miR-125a-5p/hsa-miR-125b-5p	hsa-miR-135a-5p	hsa-miR-142-5p	hsa-miR-186-5p/hsa-miR-186-5p	hsa-miR-204-5p	hsa-miR-29a-3p/hsa-miR-29b-3p	hsa-miR-30b-5p/hsa-miR-30c-5p/hsa-miR-30d-5p	hsa-miR-362-3p	hsa-miR-381-3p	hsa-miR-424-5p	hsa-miR-448
ZCCHC24	0.0121215	0.492897	0.545455	12	hsa-miR-128-3p/hsa-miR-128-3p/hsa-miR-216a-3p	hsa-miR-135a-5p	hsa-miR-141-3p/hsa-miR-200a-3p	hsa-miR-186-5p/hsa-miR-186-5p	hsa-miR-204-5p	hsa-miR-26a-5p	hsa-miR-27b-3p	hsa-miR-302b-3p/hsa-miR-520a-3p	hsa-miR-30b-5p/hsa-miR-30c-5p/hsa-miR-30d-5p	hsa-miR-362-3p	hsa-miR-374a-5p	hsa-miR-429
HIPK3	0.0129264	0.492897	0.613636	16	hsa-miR-125a-5p/hsa-miR-125b-5p	hsa-miR-128-3p/hsa-miR-128-3p/hsa-miR-216a-3p	hsa-miR-135a-5p	hsa-miR-138-5p	hsa-miR-141-3p/hsa-miR-200a-3p	hsa-miR-146a-5p	hsa-miR-205-5p	hsa-miR-21-5p	hsa-miR-27b-3p	hsa-miR-302b-3p/hsa-miR-520a-3p	hsa-miR-362-3p	hsa-miR-424-5p	hsa-miR-425-5p	hsa-miR-429	hsa-miR-92a-3p/hsa-miR-92b-3p	hsa-miR-9-5p
BLOC1S5	0.01322	0.492897	0.484848	9	hsa-let-7b-5p/hsa-let-7e-5p/hsa-let-7f-5p	hsa-miR-128-3p/hsa-miR-128-3p/hsa-miR-216a-3p	hsa-miR-204-5p	hsa-miR-216a-5p	hsa-miR-27b-3p	hsa-miR-302b-3p/hsa-miR-520a-3p	hsa-miR-371a-5p	hsa-miR-494-3p	hsa-miR-92a-3p/hsa-miR-92b-3p
CCNY	0.01322	0.492897	0.484848	9	hsa-let-7b-5p/hsa-let-7e-5p/hsa-let-7f-5p	hsa-miR-128-3p/hsa-miR-128-3p/hsa-miR-216a-3p	hsa-miR-204-5p	hsa-miR-216b-5p	hsa-miR-27b-3p	hsa-miR-30b-5p/hsa-miR-30c-5p/hsa-miR-30d-5p	hsa-miR-371a-5p	hsa-miR-381-3p	hsa-miR-494-3p
GK5	0.01322	0.492897	0.484848	9	hsa-let-7b-5p/hsa-let-7e-5p/hsa-let-7f-5p	hsa-miR-125a-5p/hsa-miR-125b-5p	hsa-miR-135a-5p	hsa-miR-138-5p	hsa-miR-186-5p/hsa-miR-186-5p	hsa-miR-34a-5p/hsa-miR-34c-5p/hsa-miR-449a/hsa-miR-449b-5p	hsa-miR-384	hsa-miR-423-5p	hsa-miR-494-3p
MSL1	0.01322	0.492897	0.484848	9	hsa-miR-125a-5p/hsa-miR-125b-5p	hsa-miR-128-3p/hsa-miR-128-3p/hsa-miR-216a-3p	hsa-miR-141-3p/hsa-miR-200a-3p	hsa-miR-21-5p	hsa-miR-27b-3p	hsa-miR-29a-3p/hsa-miR-29b-3p	hsa-miR-302b-3p/hsa-miR-520a-3p	hsa-miR-362-3p	hsa-miR-424-5p
NCOA3	0.01322	0.492897	0.484848	9	hsa-miR-141-3p/hsa-miR-200a-3p	hsa-miR-142-5p	hsa-miR-27b-3p	hsa-miR-29a-3p/hsa-miR-29b-3p	hsa-miR-302b-3p/hsa-miR-520a-3p	hsa-miR-30b-5p/hsa-miR-30c-5p/hsa-miR-30d-5p	hsa-miR-429	hsa-miR-92a-3p/hsa-miR-92b-3p	hsa-miR-9-5p
SORT1	0.01322	0.492897	0.484848	9	hsa-miR-125a-5p/hsa-miR-125b-5p	hsa-miR-142-5p	hsa-miR-146a-5p	hsa-miR-186-5p/hsa-miR-186-5p	hsa-miR-204-5p	hsa-miR-424-5p	hsa-miR-429	hsa-miR-7-5p	hsa-miR-9-5p
TBC1D4	0.01322	0.492897	0.484848	9	hsa-miR-128-3p/hsa-miR-128-3p/hsa-miR-216a-3p	hsa-miR-135a-5p	hsa-miR-138-5p	hsa-miR-216b-5p	hsa-miR-26a-5p	hsa-miR-27b-3p	hsa-miR-381-3p	hsa-miR-494-3p	hsa-miR-9-5p
TET1	0.01322	0.492897	0.484848	9	hsa-miR-128-3p/hsa-miR-128-3p/hsa-miR-216a-3p	hsa-miR-141-3p/hsa-miR-200a-3p	hsa-miR-205-5p	hsa-miR-21-5p	hsa-miR-26a-5p	hsa-miR-27b-3p	hsa-miR-29a-3p/hsa-miR-29b-3p	hsa-miR-302b-3p/hsa-miR-520a-3p	hsa-miR-30b-5p/hsa-miR-30c-5p/hsa-miR-30d-5p
DIDO1	0.013542	0.492897	0.349091	5	hsa-miR-128-3p/hsa-miR-128-3p/hsa-miR-216a-3p	hsa-miR-135a-5p	hsa-miR-142-5p	hsa-miR-26a-5p	hsa-miR-27b-3p
FKBP14	0.013542	0.492897	0.349091	5	hsa-miR-128-3p/hsa-miR-128-3p/hsa-miR-216a-3p	hsa-miR-186-5p/hsa-miR-186-5p	hsa-miR-27b-3p	hsa-miR-29a-3p/hsa-miR-29b-3p	hsa-miR-92a-3p/hsa-miR-92b-3p
HNRNPD	0.013542	0.492897	0.349091	5	hsa-miR-146a-5p	hsa-miR-381-3p	hsa-miR-384	hsa-miR-425-5p	hsa-miR-429
INTS2	0.013542	0.492897	0.349091	5	hsa-let-7b-5p/hsa-let-7e-5p/hsa-let-7f-5p	hsa-miR-135a-5p	hsa-miR-186-5p/hsa-miR-186-5p	hsa-miR-26a-5p	hsa-miR-30b-5p/hsa-miR-30c-5p/hsa-miR-30d-5p
JAG2	0.013542	0.492897	0.349091	5	hsa-miR-186-5p/hsa-miR-186-5p	hsa-miR-30b-5p/hsa-miR-30c-5p/hsa-miR-30d-5p	hsa-miR-381-3p	hsa-miR-429	hsa-miR-501-3p
NOS1AP	0.013542	0.492897	0.349091	5	hsa-miR-135a-5p	hsa-miR-204-5p	hsa-miR-302b-3p/hsa-miR-520a-3p	hsa-miR-34a-5p/hsa-miR-34c-5p/hsa-miR-449a/hsa-miR-449b-5p	hsa-miR-425-5p
OSBPL11	0.013542	0.492897	0.349091	5	hsa-miR-141-3p/hsa-miR-200a-3p	hsa-miR-26a-5p	hsa-miR-27b-3p	hsa-miR-429	hsa-miR-7-5p
RARA	0.013542	0.492897	0.349091	5	hsa-miR-128-3p/hsa-miR-128-3p/hsa-miR-216a-3p	hsa-miR-135a-5p	hsa-miR-138-5p	hsa-miR-205-5p	hsa-miR-27b-3p
RP2	0.013542	0.492897	0.349091	5	hsa-miR-21-5p	hsa-miR-216a-5p	hsa-miR-26a-5p	hsa-miR-448	hsa-miR-9-5p
SGPP1	0.013542	0.492897	0.349091	5	hsa-miR-128-3p/hsa-miR-128-3p/hsa-miR-216a-3p	hsa-miR-27b-3p	hsa-miR-34a-5p/hsa-miR-34c-5p/hsa-miR-449a/hsa-miR-449b-5p	hsa-miR-448	hsa-miR-92a-3p/hsa-miR-92b-3p
TRIM41	0.013542	0.492897	0.349091	5	hsa-let-7b-5p/hsa-let-7e-5p/hsa-let-7f-5p	hsa-miR-204-5p	hsa-miR-296-5p	hsa-miR-34a-5p/hsa-miR-34c-5p/hsa-miR-449a/hsa-miR-449b-5p	hsa-miR-423-5p
TVP23B	0.013542	0.492897	0.349091	5	hsa-miR-142-5p	hsa-miR-302b-3p/hsa-miR-520a-3p	hsa-miR-30b-5p/hsa-miR-30c-5p/hsa-miR-30d-5p	hsa-miR-381-3p	hsa-miR-424-5p
TXNIP	0.013542	0.492897	0.349091	5	hsa-miR-128-3p/hsa-miR-128-3p/hsa-miR-216a-3p	hsa-miR-135a-5p	hsa-miR-186-5p/hsa-miR-186-5p	hsa-miR-302b-3p/hsa-miR-520a-3p	hsa-miR-424-5p
CCNJ	0.0137131	0.492897	0.570629	13	hsa-let-7b-5p/hsa-let-7e-5p/hsa-let-7f-5p	hsa-miR-125a-5p/hsa-miR-125b-5p	hsa-miR-128-3p/hsa-miR-128-3p/hsa-miR-216a-3p	hsa-miR-146a-5p	hsa-miR-205-5p	hsa-miR-216b-5p	hsa-miR-26a-5p	hsa-miR-27b-3p	hsa-miR-29a-3p/hsa-miR-29b-3p	hsa-miR-302b-3p/hsa-miR-520a-3p	hsa-miR-429	hsa-miR-92a-3p/hsa-miR-92b-3p	hsa-miR-9-5p
TRAF3	0.0137131	0.492897	0.570629	13	hsa-miR-128-3p/hsa-miR-128-3p/hsa-miR-216a-3p	hsa-miR-155-5p	hsa-miR-26a-5p	hsa-miR-27b-3p	hsa-miR-28-3p	hsa-miR-29a-3p/hsa-miR-29b-3p	hsa-miR-30b-5p/hsa-miR-30c-5p/hsa-miR-30d-5p	hsa-miR-384	hsa-miR-422a	hsa-miR-424-5p	hsa-miR-494-3p	hsa-miR-92a-3p/hsa-miR-92b-3p	hsa-miR-9-5p
CSNK2A1	0.0143016	0.492897	0.535537	11	hsa-let-7b-5p/hsa-let-7e-5p/hsa-let-7f-5p	hsa-miR-125a-5p/hsa-miR-125b-5p	hsa-miR-141-3p/hsa-miR-200a-3p	hsa-miR-186-5p/hsa-miR-186-5p	hsa-miR-205-5p	hsa-miR-216a-5p	hsa-miR-216b-5p	hsa-miR-30b-5p/hsa-miR-30c-5p/hsa-miR-30d-5p	hsa-miR-362-3p	hsa-miR-381-3p	hsa-miR-384
FRMD4A	0.0143016	0.492897	0.535537	11	hsa-miR-128-3p/hsa-miR-128-3p/hsa-miR-216a-3p	hsa-miR-135a-5p	hsa-miR-138-5p	hsa-miR-141-3p/hsa-miR-200a-3p	hsa-miR-186-5p/hsa-miR-186-5p	hsa-miR-29a-3p/hsa-miR-29b-3p	hsa-miR-302b-3p/hsa-miR-520a-3p	hsa-miR-30b-5p/hsa-miR-30c-5p/hsa-miR-30d-5p	hsa-miR-34a-5p/hsa-miR-34c-5p/hsa-miR-449a/hsa-miR-449b-5p	hsa-miR-429	hsa-miR-9-5p
GPC6	0.0143016	0.492897	0.535537	11	hsa-miR-125a-5p/hsa-miR-125b-5p	hsa-miR-141-3p/hsa-miR-200a-3p	hsa-miR-302b-3p/hsa-miR-520a-3p	hsa-miR-34a-5p/hsa-miR-34c-5p/hsa-miR-449a/hsa-miR-449b-5p	hsa-miR-374a-5p	hsa-miR-381-3p	hsa-miR-424-5p	hsa-miR-429	hsa-miR-448	hsa-miR-92a-3p/hsa-miR-92b-3p	hsa-miR-9-5p
SEMA6D	0.0143016	0.492897	0.535537	11	hsa-miR-128-3p/hsa-miR-128-3p/hsa-miR-216a-3p	hsa-miR-135a-5p	hsa-miR-26a-5p	hsa-miR-27b-3p	hsa-miR-30b-5p/hsa-miR-30c-5p/hsa-miR-30d-5p	hsa-miR-381-3p	hsa-miR-424-5p	hsa-miR-429	hsa-miR-7-5p	hsa-miR-92a-3p/hsa-miR-92b-3p	hsa-miR-9-5p
SLC22A23	0.0143016	0.492897	0.535537	11	hsa-let-7b-5p/hsa-let-7e-5p/hsa-let-7f-5p	hsa-miR-128-3p/hsa-miR-128-3p/hsa-miR-216a-3p	hsa-miR-138-5p	hsa-miR-142-5p	hsa-miR-186-5p/hsa-miR-186-5p	hsa-miR-26a-5p	hsa-miR-27b-3p	hsa-miR-302b-3p/hsa-miR-520a-3p	hsa-miR-30b-5p/hsa-miR-30c-5p/hsa-miR-30d-5p	hsa-miR-7-5p	hsa-miR-9-5p
SP4	0.0143016	0.492897	0.535537	11	hsa-miR-128-3p/hsa-miR-128-3p/hsa-miR-216a-3p	hsa-miR-140-5p	hsa-miR-141-3p/hsa-miR-200a-3p	hsa-miR-186-5p/hsa-miR-186-5p	hsa-miR-205-5p	hsa-miR-216a-5p	hsa-miR-216b-5p	hsa-miR-30b-5p/hsa-miR-30c-5p/hsa-miR-30d-5p	hsa-miR-374a-5p	hsa-miR-92a-3p/hsa-miR-92b-3p	hsa-miR-9-5p
MYCN	0.0145465	0.492897	0.463636	8	hsa-let-7b-5p/hsa-let-7e-5p/hsa-let-7f-5p	hsa-miR-142-5p	hsa-miR-29a-3p/hsa-miR-29b-3p	hsa-miR-302b-3p/hsa-miR-520a-3p	hsa-miR-34a-5p/hsa-miR-34c-5p/hsa-miR-449a/hsa-miR-449b-5p	hsa-miR-371a-5p	hsa-miR-429	hsa-miR-501-3p
NBEAL1	0.0145465	0.492897	0.463636	8	hsa-miR-128-3p/hsa-miR-128-3p/hsa-miR-216a-3p	hsa-miR-142-5p	hsa-miR-186-5p/hsa-miR-186-5p	hsa-miR-27b-3p	hsa-miR-362-3p	hsa-miR-381-3p	hsa-miR-424-5p	hsa-miR-92a-3p/hsa-miR-92b-3p
SLC38A2	0.0145465	0.492897	0.463636	8	hsa-miR-140-5p	hsa-miR-141-3p/hsa-miR-200a-3p	hsa-miR-26a-5p	hsa-miR-30b-5p/hsa-miR-30c-5p/hsa-miR-30d-5p	hsa-miR-429	hsa-miR-494-3p	hsa-miR-7-5p	hsa-miR-92a-3p/hsa-miR-92b-3p
SLK	0.0145465	0.492897	0.463636	8	hsa-let-7b-5p/hsa-let-7e-5p/hsa-let-7f-5p	hsa-miR-128-3p/hsa-miR-128-3p/hsa-miR-216a-3p	hsa-miR-142-5p	hsa-miR-205-5p	hsa-miR-29a-3p/hsa-miR-29b-3p	hsa-miR-302b-3p/hsa-miR-520a-3p	hsa-miR-381-3p	hsa-miR-429
SPEN	0.0145465	0.492897	0.463636	8	hsa-miR-142-5p	hsa-miR-29a-3p/hsa-miR-29b-3p	hsa-miR-30b-5p/hsa-miR-30c-5p/hsa-miR-30d-5p	hsa-miR-34a-5p/hsa-miR-34c-5p/hsa-miR-449a/hsa-miR-449b-5p	hsa-miR-362-3p	hsa-miR-381-3p	hsa-miR-424-5p	hsa-miR-448
PDE3A	0.0149695	0.492897	0.592208	14	hsa-miR-128-3p/hsa-miR-128-3p/hsa-miR-216a-3p	hsa-miR-138-5p	hsa-miR-151a-3p	hsa-miR-155-5p	hsa-miR-186-5p/hsa-miR-186-5p	hsa-miR-204-5p	hsa-miR-21-5p	hsa-miR-27b-3p	hsa-miR-29a-3p/hsa-miR-29b-3p	hsa-miR-30b-5p/hsa-miR-30c-5p/hsa-miR-30d-5p	hsa-miR-34a-5p/hsa-miR-34c-5p/hsa-miR-449a/hsa-miR-449b-5p	hsa-miR-362-3p	hsa-miR-374a-5p	hsa-miR-9-5p
DEK	0.0153689	0.492897	0.4	6	hsa-miR-138-5p	hsa-miR-141-3p/hsa-miR-200a-3p	hsa-miR-142-5p	hsa-miR-186-5p/hsa-miR-186-5p	hsa-miR-381-3p	hsa-miR-425-5p
ELOVL4	0.0153689	0.492897	0.4	6	hsa-let-7b-5p/hsa-let-7e-5p/hsa-let-7f-5p	hsa-miR-125a-5p/hsa-miR-125b-5p	hsa-miR-128-3p/hsa-miR-128-3p/hsa-miR-216a-3p	hsa-miR-29a-3p/hsa-miR-29b-3p	hsa-miR-92a-3p/hsa-miR-92b-3p	hsa-miR-9-5p
ILDR2	0.0153689	0.492897	0.4	6	hsa-miR-128-3p/hsa-miR-128-3p/hsa-miR-216a-3p	hsa-miR-135a-5p	hsa-miR-138-5p	hsa-miR-29a-3p/hsa-miR-29b-3p	hsa-miR-30b-5p/hsa-miR-30c-5p/hsa-miR-30d-5p	hsa-miR-9-5p
LIMK1	0.0153689	0.492897	0.4	6	hsa-miR-125a-5p/hsa-miR-125b-5p	hsa-miR-128-3p/hsa-miR-128-3p/hsa-miR-216a-3p	hsa-miR-138-5p	hsa-miR-27b-3p	hsa-miR-384	hsa-miR-429
MIER2	0.0153689	0.492897	0.4	6	hsa-miR-128-3p/hsa-miR-128-3p/hsa-miR-216a-3p	hsa-miR-135a-5p	hsa-miR-138-5p	hsa-miR-27b-3p	hsa-miR-30b-5p/hsa-miR-30c-5p/hsa-miR-30d-5p	hsa-miR-7-5p
MKNK2	0.0153689	0.492897	0.4	6	hsa-miR-125a-5p/hsa-miR-125b-5p	hsa-miR-128-3p/hsa-miR-128-3p/hsa-miR-216a-3p	hsa-miR-26a-5p	hsa-miR-27b-3p	hsa-miR-302b-3p/hsa-miR-520a-3p	hsa-miR-448
MME	0.0153689	0.492897	0.4	6	hsa-miR-128-3p/hsa-miR-128-3p/hsa-miR-216a-3p	hsa-miR-186-5p/hsa-miR-186-5p	hsa-miR-216b-5p	hsa-miR-371a-5p	hsa-miR-374a-5p	hsa-miR-9-5p
N4BP2	0.0153689	0.492897	0.4	6	hsa-miR-216a-5p	hsa-miR-29a-3p/hsa-miR-29b-3p	hsa-miR-30b-5p/hsa-miR-30c-5p/hsa-miR-30d-5p	hsa-miR-374a-5p	hsa-miR-429	hsa-miR-92a-3p/hsa-miR-92b-3p
NCAM1	0.0153689	0.492897	0.4	6	hsa-miR-128-3p/hsa-miR-128-3p/hsa-miR-216a-3p	hsa-miR-141-3p/hsa-miR-200a-3p	hsa-miR-27b-3p	hsa-miR-30b-5p/hsa-miR-30c-5p/hsa-miR-30d-5p	hsa-miR-425-5p	hsa-miR-429
NEK10	0.0153689	0.492897	0.4	6	hsa-miR-125a-5p/hsa-miR-125b-5p	hsa-miR-26a-5p	hsa-miR-302b-3p/hsa-miR-520a-3p	hsa-miR-424-5p	hsa-miR-425-5p	hsa-miR-429
NXPE3	0.0153689	0.492897	0.4	6	hsa-miR-26a-5p	hsa-miR-374a-5p	hsa-miR-422a	hsa-miR-424-5p	hsa-miR-92a-3p/hsa-miR-92b-3p	hsa-miR-9-5p
PPP1CC	0.0153689	0.492897	0.4	6	hsa-miR-128-3p/hsa-miR-128-3p/hsa-miR-216a-3p	hsa-miR-135a-5p	hsa-miR-140-5p	hsa-miR-186-5p/hsa-miR-186-5p	hsa-miR-204-5p	hsa-miR-27b-3p
SEC24A	0.0153689	0.492897	0.4	6	hsa-miR-128-3p/hsa-miR-128-3p/hsa-miR-216a-3p	hsa-miR-141-3p/hsa-miR-200a-3p	hsa-miR-27b-3p	hsa-miR-30b-5p/hsa-miR-30c-5p/hsa-miR-30d-5p	hsa-miR-424-5p	hsa-miR-429
SH3RF1	0.0153689	0.492897	0.4	6	hsa-miR-128-3p/hsa-miR-128-3p/hsa-miR-216a-3p	hsa-miR-186-5p/hsa-miR-186-5p	hsa-miR-26a-5p	hsa-miR-27b-3p	hsa-miR-30b-5p/hsa-miR-30c-5p/hsa-miR-30d-5p	hsa-miR-425-5p
SIX5	0.0153689	0.492897	0.4	6	hsa-miR-138-5p	hsa-miR-27b-3p	hsa-miR-29a-3p/hsa-miR-29b-3p	hsa-miR-422a	hsa-miR-424-5p	hsa-miR-9-5p
SYNJ1	0.0153689	0.492897	0.4	6	hsa-miR-142-5p	hsa-miR-34a-5p/hsa-miR-34c-5p/hsa-miR-449a/hsa-miR-449b-5p	hsa-miR-424-5p	hsa-miR-429	hsa-miR-92a-3p/hsa-miR-92b-3p	hsa-miR-9-5p
TMEM123	0.0153689	0.492897	0.4	6	hsa-miR-125a-5p/hsa-miR-125b-5p	hsa-miR-128-3p/hsa-miR-128-3p/hsa-miR-216a-3p	hsa-miR-140-5p	hsa-miR-27b-3p	hsa-miR-302b-3p/hsa-miR-520a-3p	hsa-miR-374a-5p
USP44	0.0153689	0.492897	0.4	6	hsa-let-7b-5p/hsa-let-7e-5p/hsa-let-7f-5p	hsa-miR-146a-5p	hsa-miR-30b-5p/hsa-miR-30c-5p/hsa-miR-30d-5p	hsa-miR-424-5p	hsa-miR-448	hsa-miR-92a-3p/hsa-miR-92b-3p
ZNF629	0.0153689	0.492897	0.4	6	hsa-miR-141-3p/hsa-miR-200a-3p	hsa-miR-204-5p	hsa-miR-296-3p	hsa-miR-384	hsa-miR-424-5p	hsa-miR-9-5p
CCSER2	0.015423	0.492897	0.436364	7	hsa-miR-135a-5p	hsa-miR-26a-5p	hsa-miR-29a-3p/hsa-miR-29b-3p	hsa-miR-448	hsa-miR-7-5p	hsa-miR-92a-3p/hsa-miR-92b-3p	hsa-miR-9-5p
CTH	0.015423	0.492897	0.436364	7	hsa-miR-128-3p/hsa-miR-128-3p/hsa-miR-216a-3p	hsa-miR-204-5p	hsa-miR-205-5p	hsa-miR-216a-5p	hsa-miR-26a-5p	hsa-miR-27b-3p	hsa-miR-30b-5p/hsa-miR-30c-5p/hsa-miR-30d-5p
DUSP7	0.015423	0.492897	0.436364	7	hsa-let-7b-5p/hsa-let-7e-5p/hsa-let-7f-5p	hsa-miR-125a-5p/hsa-miR-125b-5p	hsa-miR-141-3p/hsa-miR-200a-3p	hsa-miR-155-5p	hsa-miR-186-5p/hsa-miR-186-5p	hsa-miR-205-5p	hsa-miR-429
FAM65B	0.015423	0.492897	0.436364	7	hsa-miR-125a-5p/hsa-miR-125b-5p	hsa-miR-128-3p/hsa-miR-128-3p/hsa-miR-216a-3p	hsa-miR-146a-5p	hsa-miR-27b-3p	hsa-miR-29a-3p/hsa-miR-29b-3p	hsa-miR-374a-5p	hsa-miR-424-5p
FBXW2	0.015423	0.492897	0.436364	7	hsa-miR-141-3p/hsa-miR-200a-3p	hsa-miR-146a-5p	hsa-miR-26a-5p	hsa-miR-29a-3p/hsa-miR-29b-3p	hsa-miR-429	hsa-miR-7-5p	hsa-miR-9-5p
GALNT3	0.015423	0.492897	0.436364	7	hsa-miR-128-3p/hsa-miR-128-3p/hsa-miR-216a-3p	hsa-miR-27b-3p	hsa-miR-302b-3p/hsa-miR-520a-3p	hsa-miR-30b-5p/hsa-miR-30c-5p/hsa-miR-30d-5p	hsa-miR-448	hsa-miR-7-5p	hsa-miR-9-5p
GOPC	0.015423	0.492897	0.436364	7	hsa-let-7b-5p/hsa-let-7e-5p/hsa-let-7f-5p	hsa-miR-125a-5p/hsa-miR-125b-5p	hsa-miR-142-5p	hsa-miR-28-3p	hsa-miR-29a-3p/hsa-miR-29b-3p	hsa-miR-374a-5p	hsa-miR-9-5p
IL6R	0.015423	0.492897	0.436364	7	hsa-let-7b-5p/hsa-let-7e-5p/hsa-let-7f-5p	hsa-miR-125a-5p/hsa-miR-125b-5p	hsa-miR-155-5p	hsa-miR-204-5p	hsa-miR-21-5p	hsa-miR-34a-5p/hsa-miR-34c-5p/hsa-miR-449a/hsa-miR-449b-5p	hsa-miR-9-5p
IRS2	0.015423	0.492897	0.436364	7	hsa-let-7b-5p/hsa-let-7e-5p/hsa-let-7f-5p	hsa-miR-135a-5p	hsa-miR-141-3p/hsa-miR-200a-3p	hsa-miR-30b-5p/hsa-miR-30c-5p/hsa-miR-30d-5p	hsa-miR-448	hsa-miR-7-5p	hsa-miR-92a-3p/hsa-miR-92b-3p
KPNA5	0.015423	0.492897	0.436364	7	hsa-let-7b-5p/hsa-let-7e-5p/hsa-let-7f-5p	hsa-miR-128-3p/hsa-miR-128-3p/hsa-miR-216a-3p	hsa-miR-26a-5p	hsa-miR-27b-3p	hsa-miR-424-5p	hsa-miR-448	hsa-miR-92a-3p/hsa-miR-92b-3p
MANEAL	0.015423	0.492897	0.436364	7	hsa-miR-128-3p/hsa-miR-128-3p/hsa-miR-216a-3p	hsa-miR-135a-5p	hsa-miR-138-5p	hsa-miR-204-5p	hsa-miR-27b-3p	hsa-miR-29a-3p/hsa-miR-29b-3p	hsa-miR-302b-3p/hsa-miR-520a-3p
NPR3	0.015423	0.492897	0.436364	7	hsa-miR-140-5p	hsa-miR-186-5p/hsa-miR-186-5p	hsa-miR-216a-5p	hsa-miR-362-5p	hsa-miR-381-3p	hsa-miR-424-5p	hsa-miR-494-3p
TNFAIP3	0.015423	0.492897	0.436364	7	hsa-let-7b-5p/hsa-let-7e-5p/hsa-let-7f-5p	hsa-miR-125a-5p/hsa-miR-125b-5p	hsa-miR-141-3p/hsa-miR-200a-3p	hsa-miR-142-5p	hsa-miR-27b-3p	hsa-miR-29a-3p/hsa-miR-29b-3p	hsa-miR-448
ZNF512B	0.015423	0.492897	0.436364	7	hsa-let-7b-5p/hsa-let-7e-5p/hsa-let-7f-5p	hsa-miR-125a-5p/hsa-miR-125b-5p	hsa-miR-142-5p	hsa-miR-146a-5p	hsa-miR-29a-3p/hsa-miR-29b-3p	hsa-miR-302b-3p/hsa-miR-520a-3p	hsa-miR-92a-3p/hsa-miR-92b-3p
ZNF521	0.015423	0.492897	0.436364	7	hsa-miR-204-5p	hsa-miR-216a-5p	hsa-miR-216b-5p	hsa-miR-30b-5p/hsa-miR-30c-5p/hsa-miR-30d-5p	hsa-miR-381-3p	hsa-miR-448	hsa-miR-92a-3p/hsa-miR-92b-3p
BMPR2	0.0159073	0.504879	0.610909	15	hsa-miR-100-5p	hsa-miR-125a-5p/hsa-miR-125b-5p	hsa-miR-128-3p/hsa-miR-128-3p/hsa-miR-216a-3p	hsa-miR-135a-5p	hsa-miR-186-5p/hsa-miR-186-5p	hsa-miR-21-5p	hsa-miR-27b-3p	hsa-miR-302b-3p/hsa-miR-520a-3p	hsa-miR-30b-5p/hsa-miR-30c-5p/hsa-miR-30d-5p	hsa-miR-362-3p	hsa-miR-381-3p	hsa-miR-423-5p	hsa-miR-494-3p	hsa-miR-7-5p	hsa-miR-92a-3p/hsa-miR-92b-3p
GRIN2B	0.0159073	0.504879	0.610909	15	hsa-let-7b-5p/hsa-let-7e-5p/hsa-let-7f-5p	hsa-miR-128-3p/hsa-miR-128-3p/hsa-miR-216a-3p	hsa-miR-135a-5p	hsa-miR-142-5p	hsa-miR-186-5p/hsa-miR-186-5p	hsa-miR-204-5p	hsa-miR-216a-5p	hsa-miR-26a-5p	hsa-miR-296-3p	hsa-miR-29a-3p/hsa-miR-29b-3p	hsa-miR-34a-5p/hsa-miR-34c-5p/hsa-miR-449a/hsa-miR-449b-5p	hsa-miR-362-3p	hsa-miR-374a-5p	hsa-miR-381-3p	hsa-miR-7-5p
ACVR2A	0.0164481	0.51848	0.563636	12	hsa-let-7b-5p/hsa-let-7e-5p/hsa-let-7f-5p	hsa-miR-125a-5p/hsa-miR-125b-5p	hsa-miR-128-3p/hsa-miR-128-3p/hsa-miR-216a-3p	hsa-miR-138-5p	hsa-miR-141-3p/hsa-miR-200a-3p	hsa-miR-155-5p	hsa-miR-21-5p	hsa-miR-27b-3p	hsa-miR-29a-3p/hsa-miR-29b-3p	hsa-miR-424-5p	hsa-miR-429	hsa-miR-448
PKIA	0.0164481	0.51848	0.563636	12	hsa-let-7b-5p/hsa-let-7e-5p/hsa-let-7f-5p	hsa-miR-128-3p/hsa-miR-128-3p/hsa-miR-216a-3p	hsa-miR-151a-3p	hsa-miR-155-5p	hsa-miR-27b-3p	hsa-miR-34a-5p/hsa-miR-34c-5p/hsa-miR-449a/hsa-miR-449b-5p	hsa-miR-374a-5p	hsa-miR-381-3p	hsa-miR-423-5p	hsa-miR-424-5p	hsa-miR-429	hsa-miR-7-5p
TGFBR2	0.0165514	0.519962	0.627273	16	hsa-miR-128-3p/hsa-miR-128-3p/hsa-miR-216a-3p	hsa-miR-135a-5p	hsa-miR-142-5p	hsa-miR-155-5p	hsa-miR-186-5p/hsa-miR-186-5p	hsa-miR-204-5p	hsa-miR-21-5p	hsa-miR-216a-5p	hsa-miR-27b-3p	hsa-miR-302b-3p/hsa-miR-520a-3p	hsa-miR-384	hsa-miR-425-5p	hsa-miR-448	hsa-miR-501-3p	hsa-miR-7-5p	hsa-miR-9-5p
MAPRE2	0.0166867	0.520672	0.523636	10	hsa-miR-125a-5p/hsa-miR-125b-5p	hsa-miR-128-3p/hsa-miR-128-3p/hsa-miR-216a-3p	hsa-miR-135a-5p	hsa-miR-141-3p/hsa-miR-200a-3p	hsa-miR-204-5p	hsa-miR-216a-5p	hsa-miR-29a-3p/hsa-miR-29b-3p	hsa-miR-302b-3p/hsa-miR-520a-3p	hsa-miR-374a-5p	hsa-miR-448
WAPAL	0.0166867	0.520672	0.523636	10	hsa-let-7b-5p/hsa-let-7e-5p/hsa-let-7f-5p	hsa-miR-135a-5p	hsa-miR-141-3p/hsa-miR-200a-3p	hsa-miR-26a-5p	hsa-miR-362-3p	hsa-miR-381-3p	hsa-miR-424-5p	hsa-miR-429	hsa-miR-7-5p	hsa-miR-9-5p
HSPA4L	0.0181558	0.562641	0.587413	13	hsa-miR-135a-5p	hsa-miR-138-5p	hsa-miR-140-5p	hsa-miR-142-5p	hsa-miR-146a-5p	hsa-miR-204-5p	hsa-miR-216b-5p	hsa-miR-26a-5p	hsa-miR-29a-3p/hsa-miR-29b-3p	hsa-miR-302b-3p/hsa-miR-520a-3p	hsa-miR-30b-5p/hsa-miR-30c-5p/hsa-miR-30d-5p	hsa-miR-384	hsa-miR-424-5p
WDR37	0.0181558	0.562641	0.587413	13	hsa-let-7b-5p/hsa-let-7e-5p/hsa-let-7f-5p	hsa-miR-140-5p	hsa-miR-27b-3p	hsa-miR-29a-3p/hsa-miR-29b-3p	hsa-miR-302b-3p/hsa-miR-520a-3p	hsa-miR-30b-5p/hsa-miR-30c-5p/hsa-miR-30d-5p	hsa-miR-34a-5p/hsa-miR-34c-5p/hsa-miR-449a/hsa-miR-449b-5p	hsa-miR-371a-5p	hsa-miR-374a-5p	hsa-miR-422a	hsa-miR-424-5p	hsa-miR-494-3p	hsa-miR-92a-3p/hsa-miR-92b-3p
BCAT1	0.0192128	0.562641	0.509091	9	hsa-let-7b-5p/hsa-let-7e-5p/hsa-let-7f-5p	hsa-miR-125a-5p/hsa-miR-125b-5p	hsa-miR-135a-5p	hsa-miR-155-5p	hsa-miR-186-5p/hsa-miR-186-5p	hsa-miR-216a-5p	hsa-miR-26a-5p	hsa-miR-302b-3p/hsa-miR-520a-3p	hsa-miR-374a-5p
DTNA	0.0192128	0.562641	0.509091	9	hsa-miR-128-3p/hsa-miR-128-3p/hsa-miR-216a-3p	hsa-miR-135a-5p	hsa-miR-140-5p	hsa-miR-216a-5p	hsa-miR-27b-3p	hsa-miR-28-3p	hsa-miR-30b-5p/hsa-miR-30c-5p/hsa-miR-30d-5p	hsa-miR-429	hsa-miR-448
FAM46A	0.0192128	0.562641	0.509091	9	hsa-miR-125a-5p/hsa-miR-125b-5p	hsa-miR-140-5p	hsa-miR-204-5p	hsa-miR-21-5p	hsa-miR-30b-5p/hsa-miR-30c-5p/hsa-miR-30d-5p	hsa-miR-34a-5p/hsa-miR-34c-5p/hsa-miR-449a/hsa-miR-449b-5p	hsa-miR-381-3p	hsa-miR-92a-3p/hsa-miR-92b-3p	hsa-miR-9-5p
RPS6KB1	0.0192128	0.562641	0.509091	9	hsa-miR-128-3p/hsa-miR-128-3p/hsa-miR-216a-3p	hsa-miR-135a-5p	hsa-miR-155-5p	hsa-miR-186-5p/hsa-miR-186-5p	hsa-miR-27b-3p	hsa-miR-429	hsa-miR-455-5p	hsa-miR-7-5p	hsa-miR-92a-3p/hsa-miR-92b-3p
ZKSCAN1	0.0192128	0.562641	0.509091	9	hsa-miR-135a-5p	hsa-miR-141-3p/hsa-miR-200a-3p	hsa-miR-151a-3p	hsa-miR-26a-5p	hsa-miR-302b-3p/hsa-miR-520a-3p	hsa-miR-371a-5p	hsa-miR-422a	hsa-miR-424-5p	hsa-miR-9-5p
BZW1	0.019573	0.562641	0.555372	11	hsa-let-7b-5p/hsa-let-7e-5p/hsa-let-7f-5p	hsa-miR-128-3p/hsa-miR-128-3p/hsa-miR-216a-3p	hsa-miR-135a-5p	hsa-miR-142-5p	hsa-miR-186-5p/hsa-miR-186-5p	hsa-miR-204-5p	hsa-miR-27b-3p	hsa-miR-30b-5p/hsa-miR-30c-5p/hsa-miR-30d-5p	hsa-miR-374a-5p	hsa-miR-424-5p	hsa-miR-7-5p
HIPK1	0.019573	0.562641	0.555372	11	hsa-miR-138-5p	hsa-miR-141-3p/hsa-miR-200a-3p	hsa-miR-142-5p	hsa-miR-26a-5p	hsa-miR-296-5p	hsa-miR-30b-5p/hsa-miR-30c-5p/hsa-miR-30d-5p	hsa-miR-362-3p	hsa-miR-381-3p	hsa-miR-429	hsa-miR-92a-3p/hsa-miR-92b-3p	hsa-miR-9-5p
NAV1	0.019573	0.562641	0.555372	11	hsa-miR-204-5p	hsa-miR-26a-5p	hsa-miR-27b-3p	hsa-miR-29a-3p/hsa-miR-29b-3p	hsa-miR-30b-5p/hsa-miR-30c-5p/hsa-miR-30d-5p	hsa-miR-34a-5p/hsa-miR-34c-5p/hsa-miR-449a/hsa-miR-449b-5p	hsa-miR-362-5p	hsa-miR-371a-5p	hsa-miR-423-5p	hsa-miR-424-5p	hsa-miR-448
RAB11A	0.019573	0.562641	0.555372	11	hsa-miR-138-5p	hsa-miR-140-5p	hsa-miR-142-5p	hsa-miR-186-5p/hsa-miR-186-5p	hsa-miR-21-5p	hsa-miR-216a-5p	hsa-miR-26a-5p	hsa-miR-302b-3p/hsa-miR-520a-3p	hsa-miR-30b-5p/hsa-miR-30c-5p/hsa-miR-30d-5p	hsa-miR-371a-5p	hsa-miR-422a
SHOC2	0.019573	0.562641	0.555372	11	hsa-miR-128-3p/hsa-miR-128-3p/hsa-miR-216a-3p	hsa-miR-135a-5p	hsa-miR-186-5p/hsa-miR-186-5p	hsa-miR-216a-5p	hsa-miR-296-3p	hsa-miR-30b-5p/hsa-miR-30c-5p/hsa-miR-30d-5p	hsa-miR-34a-5p/hsa-miR-34c-5p/hsa-miR-449a/hsa-miR-449b-5p	hsa-miR-374a-5p	hsa-miR-424-5p	hsa-miR-455-5p	hsa-miR-494-3p
SUV420H1	0.019573	0.562641	0.555372	11	hsa-miR-138-5p	hsa-miR-186-5p/hsa-miR-186-5p	hsa-miR-27b-3p	hsa-miR-29a-3p/hsa-miR-29b-3p	hsa-miR-302b-3p/hsa-miR-520a-3p	hsa-miR-371a-5p	hsa-miR-381-3p	hsa-miR-425-5p	hsa-miR-429	hsa-miR-448	hsa-miR-92a-3p/hsa-miR-92b-3p
UBXN7	0.019573	0.562641	0.555372	11	hsa-miR-128-3p/hsa-miR-128-3p/hsa-miR-216a-3p	hsa-miR-140-5p	hsa-miR-142-5p	hsa-miR-186-5p/hsa-miR-186-5p	hsa-miR-216b-5p	hsa-miR-26a-5p	hsa-miR-28-3p	hsa-miR-29a-3p/hsa-miR-29b-3p	hsa-miR-381-3p	hsa-miR-429	hsa-miR-9-5p
TAOK1	0.0200079	0.562641	0.696104	21	hsa-let-7b-5p/hsa-let-7e-5p/hsa-let-7f-5p	hsa-miR-100-5p	hsa-miR-125a-5p/hsa-miR-125b-5p	hsa-miR-128-3p/hsa-miR-128-3p/hsa-miR-216a-3p	hsa-miR-138-5p	hsa-miR-155-5p	hsa-miR-204-5p	hsa-miR-205-5p	hsa-miR-216a-5p	hsa-miR-26a-5p	hsa-miR-27b-3p	hsa-miR-302b-3p/hsa-miR-520a-3p	hsa-miR-30b-5p/hsa-miR-30c-5p/hsa-miR-30d-5p	hsa-miR-374a-5p	hsa-miR-381-3p	hsa-miR-424-5p	hsa-miR-425-5p	hsa-miR-429	hsa-miR-448	hsa-miR-455-5p	hsa-miR-494-3p
ZNF148	0.0203649	0.562641	0.625455	15	hsa-miR-125a-5p/hsa-miR-125b-5p	hsa-miR-138-5p	hsa-miR-142-5p	hsa-miR-146a-5p	hsa-miR-204-5p	hsa-miR-205-5p	hsa-miR-216b-5p	hsa-miR-26a-5p	hsa-miR-27b-3p	hsa-miR-302b-3p/hsa-miR-520a-3p	hsa-miR-30b-5p/hsa-miR-30c-5p/hsa-miR-30d-5p	hsa-miR-425-5p	hsa-miR-429	hsa-miR-7-5p	hsa-miR-92a-3p/hsa-miR-92b-3p
NFIA	0.020595	0.562641	0.687273	20	hsa-miR-128-3p/hsa-miR-128-3p/hsa-miR-216a-3p	hsa-miR-138-5p	hsa-miR-141-3p/hsa-miR-200a-3p	hsa-miR-142-5p	hsa-miR-155-5p	hsa-miR-204-5p	hsa-miR-205-5p	hsa-miR-21-5p	hsa-miR-216b-5p	hsa-miR-27b-3p	hsa-miR-29a-3p/hsa-miR-29b-3p	hsa-miR-302b-3p/hsa-miR-520a-3p	hsa-miR-30b-5p/hsa-miR-30c-5p/hsa-miR-30d-5p	hsa-miR-374a-5p	hsa-miR-381-3p	hsa-miR-429	hsa-miR-448	hsa-miR-7-5p	hsa-miR-92a-3p/hsa-miR-92b-3p	hsa-miR-9-5p
RPS6KA3	0.0212171	0.562641	0.654545	17	hsa-let-7b-5p/hsa-let-7e-5p/hsa-let-7f-5p	hsa-miR-140-5p	hsa-miR-142-5p	hsa-miR-151a-3p	hsa-miR-155-5p	hsa-miR-186-5p/hsa-miR-186-5p	hsa-miR-204-5p	hsa-miR-205-5p	hsa-miR-21-5p	hsa-miR-216a-5p	hsa-miR-216b-5p	hsa-miR-29a-3p/hsa-miR-29b-3p	hsa-miR-302b-3p/hsa-miR-520a-3p	hsa-miR-381-3p	hsa-miR-424-5p	hsa-miR-429	hsa-miR-494-3p
AATK	0.0215517	0.562641	0.327273	4	hsa-miR-371a-5p	hsa-miR-424-5p	hsa-miR-92a-3p/hsa-miR-92b-3p	hsa-miR-9-5p
ADAMTS10	0.0215517	0.562641	0.327273	4	hsa-miR-128-3p/hsa-miR-128-3p/hsa-miR-216a-3p	hsa-miR-27b-3p	hsa-miR-296-5p	hsa-miR-29a-3p/hsa-miR-29b-3p
CABLES2	0.0215517	0.562641	0.327273	4	hsa-miR-128-3p/hsa-miR-128-3p/hsa-miR-216a-3p	hsa-miR-138-5p	hsa-miR-27b-3p	hsa-miR-30b-5p/hsa-miR-30c-5p/hsa-miR-30d-5p
CLDN1	0.0215517	0.562641	0.327273	4	hsa-miR-155-5p	hsa-miR-186-5p/hsa-miR-186-5p	hsa-miR-29a-3p/hsa-miR-29b-3p	hsa-miR-381-3p
CLDN12	0.0215517	0.562641	0.327273	4	hsa-let-7b-5p/hsa-let-7e-5p/hsa-let-7f-5p	hsa-miR-125a-5p/hsa-miR-125b-5p	hsa-miR-216a-5p	hsa-miR-424-5p
COL21A1	0.0215517	0.562641	0.327273	4	hsa-miR-128-3p/hsa-miR-128-3p/hsa-miR-216a-3p	hsa-miR-155-5p	hsa-miR-27b-3p	hsa-miR-29a-3p/hsa-miR-29b-3p
DGKD	0.0215517	0.562641	0.327273	4	hsa-miR-29a-3p/hsa-miR-29b-3p	hsa-miR-30b-5p/hsa-miR-30c-5p/hsa-miR-30d-5p	hsa-miR-381-3p	hsa-miR-7-5p
EML1	0.0215517	0.562641	0.327273	4	hsa-miR-128-3p/hsa-miR-128-3p/hsa-miR-216a-3p	hsa-miR-27b-3p	hsa-miR-30b-5p/hsa-miR-30c-5p/hsa-miR-30d-5p	hsa-miR-381-3p
FAM136A	0.0215517	0.562641	0.327273	4	hsa-miR-205-5p	hsa-miR-26a-5p	hsa-miR-29a-3p/hsa-miR-29b-3p	hsa-miR-9-5p
FAM13C	0.0215517	0.562641	0.327273	4	hsa-miR-302b-3p/hsa-miR-520a-3p	hsa-miR-30b-5p/hsa-miR-30c-5p/hsa-miR-30d-5p	hsa-miR-374a-5p	hsa-miR-9-5p
ICOS	0.0215517	0.562641	0.327273	4	hsa-let-7b-5p/hsa-let-7e-5p/hsa-let-7f-5p	hsa-miR-26a-5p	hsa-miR-27b-3p	hsa-miR-29a-3p/hsa-miR-29b-3p
LAMTOR3	0.0215517	0.562641	0.327273	4	hsa-miR-141-3p/hsa-miR-200a-3p	hsa-miR-151a-3p	hsa-miR-371a-5p	hsa-miR-424-5p
LHX5	0.0215517	0.562641	0.327273	4	hsa-miR-30b-5p/hsa-miR-30c-5p/hsa-miR-30d-5p	hsa-miR-374a-5p	hsa-miR-381-3p	hsa-miR-9-5p
MAN1A1	0.0215517	0.562641	0.327273	4	hsa-miR-135a-5p	hsa-miR-142-5p	hsa-miR-302b-3p/hsa-miR-520a-3p	hsa-miR-455-5p
MIOS	0.0215517	0.562641	0.327273	4	hsa-let-7b-5p/hsa-let-7e-5p/hsa-let-7f-5p	hsa-miR-371a-5p	hsa-miR-448	hsa-miR-7-5p
NPC1	0.0215517	0.562641	0.327273	4	hsa-miR-135a-5p	hsa-miR-141-3p/hsa-miR-200a-3p	hsa-miR-429	hsa-miR-92a-3p/hsa-miR-92b-3p
NTF3	0.0215517	0.562641	0.327273	4	hsa-miR-21-5p	hsa-miR-374a-5p	hsa-miR-429	hsa-miR-448
OAF	0.0215517	0.562641	0.327273	4	hsa-miR-128-3p/hsa-miR-128-3p/hsa-miR-216a-3p	hsa-miR-205-5p	hsa-miR-26a-5p	hsa-miR-27b-3p
PCDH20	0.0215517	0.562641	0.327273	4	hsa-let-7b-5p/hsa-let-7e-5p/hsa-let-7f-5p	hsa-miR-205-5p	hsa-miR-30b-5p/hsa-miR-30c-5p/hsa-miR-30d-5p	hsa-miR-92a-3p/hsa-miR-92b-3p
PCSK2	0.0215517	0.562641	0.327273	4	hsa-miR-362-3p	hsa-miR-381-3p	hsa-miR-429	hsa-miR-9-5p
PHB	0.0215517	0.562641	0.327273	4	hsa-miR-128-3p/hsa-miR-128-3p/hsa-miR-216a-3p	hsa-miR-205-5p	hsa-miR-27b-3p	hsa-miR-362-3p
POGLUT1	0.0215517	0.562641	0.327273	4	hsa-let-7b-5p/hsa-let-7e-5p/hsa-let-7f-5p	hsa-miR-128-3p/hsa-miR-128-3p/hsa-miR-216a-3p	hsa-miR-27b-3p	hsa-miR-30b-5p/hsa-miR-30c-5p/hsa-miR-30d-5p
POU2F3	0.0215517	0.562641	0.327273	4	hsa-miR-128-3p/hsa-miR-128-3p/hsa-miR-216a-3p	hsa-miR-135a-5p	hsa-miR-27b-3p	hsa-miR-9-5p
PTGDR	0.0215517	0.562641	0.327273	4	hsa-miR-128-3p/hsa-miR-128-3p/hsa-miR-216a-3p	hsa-miR-27b-3p	hsa-miR-302b-3p/hsa-miR-520a-3p	hsa-miR-429
RBM12B	0.0215517	0.562641	0.327273	4	hsa-miR-26a-5p	hsa-miR-27b-3p	hsa-miR-381-3p	hsa-miR-429
RET	0.0215517	0.562641	0.327273	4	hsa-miR-128-3p/hsa-miR-128-3p/hsa-miR-216a-3p	hsa-miR-27b-3p	hsa-miR-34a-5p/hsa-miR-34c-5p/hsa-miR-449a/hsa-miR-449b-5p	hsa-miR-424-5p
SERINC1	0.0215517	0.562641	0.327273	4	hsa-miR-141-3p/hsa-miR-200a-3p	hsa-miR-28-3p	hsa-miR-422a	hsa-miR-429
SLC20A1	0.0215517	0.562641	0.327273	4	hsa-let-7b-5p/hsa-let-7e-5p/hsa-let-7f-5p	hsa-miR-138-5p	hsa-miR-141-3p/hsa-miR-200a-3p	hsa-miR-27b-3p
SOX2	0.0215517	0.562641	0.327273	4	hsa-miR-21-5p	hsa-miR-371a-5p	hsa-miR-381-3p	hsa-miR-429
TMED7-TICAM2	0.0215517	0.562641	0.327273	4	hsa-miR-151a-3p	hsa-miR-186-5p/hsa-miR-186-5p	hsa-miR-204-5p	hsa-miR-422a
TMEM154	0.0215517	0.562641	0.327273	4	hsa-miR-30b-5p/hsa-miR-30c-5p/hsa-miR-30d-5p	hsa-miR-424-5p	hsa-miR-494-3p	hsa-miR-7-5p
WDR52	0.0215517	0.562641	0.327273	4	hsa-miR-141-3p/hsa-miR-200a-3p	hsa-miR-302b-3p/hsa-miR-520a-3p	hsa-miR-374a-5p	hsa-miR-501-3p
DCC	0.0217478	0.562641	0.490909	8	hsa-miR-128-3p/hsa-miR-128-3p/hsa-miR-216a-3p	hsa-miR-204-5p	hsa-miR-27b-3p	hsa-miR-381-3p	hsa-miR-448	hsa-miR-501-3p	hsa-miR-92a-3p/hsa-miR-92b-3p	hsa-miR-9-5p
FAM81A	0.0217478	0.562641	0.490909	8	hsa-miR-135a-5p	hsa-miR-27b-3p	hsa-miR-30b-5p/hsa-miR-30c-5p/hsa-miR-30d-5p	hsa-miR-34a-5p/hsa-miR-34c-5p/hsa-miR-449a/hsa-miR-449b-5p	hsa-miR-424-5p	hsa-miR-429	hsa-miR-92a-3p/hsa-miR-92b-3p	hsa-miR-9-5p
FOXK1	0.0217478	0.562641	0.490909	8	hsa-miR-135a-5p	hsa-miR-138-5p	hsa-miR-155-5p	hsa-miR-186-5p/hsa-miR-186-5p	hsa-miR-362-3p	hsa-miR-371a-5p	hsa-miR-424-5p	hsa-miR-429
HMBOX1	0.0217478	0.562641	0.490909	8	hsa-miR-135a-5p	hsa-miR-140-5p	hsa-miR-26a-5p	hsa-miR-27b-3p	hsa-miR-302b-3p/hsa-miR-520a-3p	hsa-miR-381-3p	hsa-miR-424-5p	hsa-miR-429
IMPAD1	0.0217478	0.562641	0.490909	8	hsa-miR-125a-5p/hsa-miR-125b-5p	hsa-miR-138-5p	hsa-miR-216a-5p	hsa-miR-371a-5p	hsa-miR-425-5p	hsa-miR-429	hsa-miR-448	hsa-miR-9-5p
NEBL	0.0217478	0.562641	0.490909	8	hsa-miR-128-3p/hsa-miR-128-3p/hsa-miR-216a-3p	hsa-miR-138-5p	hsa-miR-216a-5p	hsa-miR-27b-3p	hsa-miR-29a-3p/hsa-miR-29b-3p	hsa-miR-424-5p	hsa-miR-448	hsa-miR-9-5p
PER2	0.0217478	0.562641	0.490909	8	hsa-miR-128-3p/hsa-miR-128-3p/hsa-miR-216a-3p	hsa-miR-138-5p	hsa-miR-27b-3p	hsa-miR-30b-5p/hsa-miR-30c-5p/hsa-miR-30d-5p	hsa-miR-34a-5p/hsa-miR-34c-5p/hsa-miR-449a/hsa-miR-449b-5p	hsa-miR-422a	hsa-miR-92a-3p/hsa-miR-92b-3p	hsa-miR-9-5p
RIMS2	0.0217478	0.562641	0.490909	8	hsa-miR-135a-5p	hsa-miR-138-5p	hsa-miR-146a-5p	hsa-miR-186-5p/hsa-miR-186-5p	hsa-miR-204-5p	hsa-miR-429	hsa-miR-92a-3p/hsa-miR-92b-3p	hsa-miR-9-5p
SLC39A9	0.0217478	0.562641	0.490909	8	hsa-miR-125a-5p/hsa-miR-125b-5p	hsa-miR-135a-5p	hsa-miR-138-5p	hsa-miR-140-5p	hsa-miR-141-3p/hsa-miR-200a-3p	hsa-miR-29a-3p/hsa-miR-29b-3p	hsa-miR-424-5p	hsa-miR-9-5p
SUZ12	0.0217478	0.562641	0.490909	8	hsa-miR-128-3p/hsa-miR-128-3p/hsa-miR-216a-3p	hsa-miR-186-5p/hsa-miR-186-5p	hsa-miR-21-5p	hsa-miR-27b-3p	hsa-miR-302b-3p/hsa-miR-520a-3p	hsa-miR-424-5p	hsa-miR-429	hsa-miR-455-5p
ZNF236	0.0217478	0.562641	0.490909	8	hsa-miR-125a-5p/hsa-miR-125b-5p	hsa-miR-135a-5p	hsa-miR-155-5p	hsa-miR-302b-3p/hsa-miR-520a-3p	hsa-miR-374a-5p	hsa-miR-381-3p	hsa-miR-429	hsa-miR-9-5p
ELL2	0.023096	0.567546	0.545455	10	hsa-miR-128-3p/hsa-miR-128-3p/hsa-miR-216a-3p	hsa-miR-141-3p/hsa-miR-200a-3p	hsa-miR-155-5p	hsa-miR-204-5p	hsa-miR-27b-3p	hsa-miR-30b-5p/hsa-miR-30c-5p/hsa-miR-30d-5p	hsa-miR-34a-5p/hsa-miR-34c-5p/hsa-miR-449a/hsa-miR-449b-5p	hsa-miR-424-5p	hsa-miR-429	hsa-miR-448
LIN28B	0.023096	0.567546	0.545455	10	hsa-let-7b-5p/hsa-let-7e-5p/hsa-let-7f-5p	hsa-miR-125a-5p/hsa-miR-125b-5p	hsa-miR-128-3p/hsa-miR-128-3p/hsa-miR-216a-3p	hsa-miR-216a-5p	hsa-miR-26a-5p	hsa-miR-27b-3p	hsa-miR-30b-5p/hsa-miR-30c-5p/hsa-miR-30d-5p	hsa-miR-424-5p	hsa-miR-455-5p	hsa-miR-9-5p
PCNX	0.023096	0.567546	0.545455	10	hsa-miR-125a-5p/hsa-miR-125b-5p	hsa-miR-128-3p/hsa-miR-128-3p/hsa-miR-216a-3p	hsa-miR-138-5p	hsa-miR-205-5p	hsa-miR-216a-5p	hsa-miR-26a-5p	hsa-miR-27b-3p	hsa-miR-34a-5p/hsa-miR-34c-5p/hsa-miR-449a/hsa-miR-449b-5p	hsa-miR-374a-5p	hsa-miR-429
PTCHD1	0.0236373	0.567546	0.604196	13	hsa-miR-128-3p/hsa-miR-128-3p/hsa-miR-216a-3p	hsa-miR-186-5p/hsa-miR-186-5p	hsa-miR-205-5p	hsa-miR-216a-5p	hsa-miR-216b-5p	hsa-miR-26a-5p	hsa-miR-27b-3p	hsa-miR-302b-3p/hsa-miR-520a-3p	hsa-miR-30b-5p/hsa-miR-30c-5p/hsa-miR-30d-5p	hsa-miR-34a-5p/hsa-miR-34c-5p/hsa-miR-449a/hsa-miR-449b-5p	hsa-miR-422a	hsa-miR-494-3p	hsa-miR-9-5p
DLL4	0.0240362	0.567546	0.467532	7	hsa-miR-128-3p/hsa-miR-128-3p/hsa-miR-216a-3p	hsa-miR-27b-3p	hsa-miR-28-3p	hsa-miR-30b-5p/hsa-miR-30c-5p/hsa-miR-30d-5p	hsa-miR-381-3p	hsa-miR-424-5p	hsa-miR-448
HDLBP	0.0240362	0.567546	0.467532	7	hsa-let-7b-5p/hsa-let-7e-5p/hsa-let-7f-5p	hsa-miR-142-5p	hsa-miR-216a-5p	hsa-miR-216b-5p	hsa-miR-425-5p	hsa-miR-448	hsa-miR-7-5p
KCTD15	0.0240362	0.567546	0.467532	7	hsa-let-7b-5p/hsa-let-7e-5p/hsa-let-7f-5p	hsa-miR-125a-5p/hsa-miR-125b-5p	hsa-miR-146a-5p	hsa-miR-296-5p	hsa-miR-29a-3p/hsa-miR-29b-3p	hsa-miR-381-3p	hsa-miR-429
KHNYN	0.0240362	0.567546	0.467532	7	hsa-let-7b-5p/hsa-let-7e-5p/hsa-let-7f-5p	hsa-miR-125a-5p/hsa-miR-125b-5p	hsa-miR-205-5p	hsa-miR-30b-5p/hsa-miR-30c-5p/hsa-miR-30d-5p	hsa-miR-362-3p	hsa-miR-424-5p	hsa-miR-9-5p
LMLN	0.0240362	0.567546	0.467532	7	hsa-let-7b-5p/hsa-let-7e-5p/hsa-let-7f-5p	hsa-miR-135a-5p	hsa-miR-141-3p/hsa-miR-200a-3p	hsa-miR-26a-5p	hsa-miR-29a-3p/hsa-miR-29b-3p	hsa-miR-30b-5p/hsa-miR-30c-5p/hsa-miR-30d-5p	hsa-miR-374a-5p
LMX1A	0.0240362	0.567546	0.467532	7	hsa-let-7b-5p/hsa-let-7e-5p/hsa-let-7f-5p	hsa-miR-142-5p	hsa-miR-29a-3p/hsa-miR-29b-3p	hsa-miR-302b-3p/hsa-miR-520a-3p	hsa-miR-494-3p	hsa-miR-501-3p	hsa-miR-9-5p
RNF169	0.0240362	0.567546	0.467532	7	hsa-miR-140-5p	hsa-miR-216a-5p	hsa-miR-216b-5p	hsa-miR-29a-3p/hsa-miR-29b-3p	hsa-miR-30b-5p/hsa-miR-30c-5p/hsa-miR-30d-5p	hsa-miR-429	hsa-miR-9-5p
SCML2	0.0240362	0.567546	0.467532	7	hsa-miR-135a-5p	hsa-miR-155-5p	hsa-miR-204-5p	hsa-miR-21-5p	hsa-miR-29a-3p/hsa-miR-29b-3p	hsa-miR-34a-5p/hsa-miR-34c-5p/hsa-miR-449a/hsa-miR-449b-5p	hsa-miR-448
SLC6A17	0.0240362	0.567546	0.467532	7	hsa-miR-125a-5p/hsa-miR-125b-5p	hsa-miR-138-5p	hsa-miR-29a-3p/hsa-miR-29b-3p	hsa-miR-34a-5p/hsa-miR-34c-5p/hsa-miR-449a/hsa-miR-449b-5p	hsa-miR-374a-5p	hsa-miR-381-3p	hsa-miR-429
STX17	0.0240362	0.567546	0.467532	7	hsa-let-7b-5p/hsa-let-7e-5p/hsa-let-7f-5p	hsa-miR-29a-3p/hsa-miR-29b-3p	hsa-miR-30b-5p/hsa-miR-30c-5p/hsa-miR-30d-5p	hsa-miR-34a-5p/hsa-miR-34c-5p/hsa-miR-449a/hsa-miR-449b-5p	hsa-miR-374a-5p	hsa-miR-424-5p	hsa-miR-92a-3p/hsa-miR-92b-3p
THAP2	0.0240362	0.567546	0.467532	7	hsa-miR-100-5p	hsa-miR-128-3p/hsa-miR-128-3p/hsa-miR-216a-3p	hsa-miR-142-5p	hsa-miR-26a-5p	hsa-miR-27b-3p	hsa-miR-448	hsa-miR-9-5p
TRIM33	0.0240362	0.567546	0.467532	7	hsa-miR-21-5p	hsa-miR-30b-5p/hsa-miR-30c-5p/hsa-miR-30d-5p	hsa-miR-362-3p	hsa-miR-429	hsa-miR-455-5p	hsa-miR-7-5p	hsa-miR-92a-3p/hsa-miR-92b-3p
ZBTB46	0.0240362	0.567546	0.467532	7	hsa-miR-135a-5p	hsa-miR-141-3p/hsa-miR-200a-3p	hsa-miR-29a-3p/hsa-miR-29b-3p	hsa-miR-34a-5p/hsa-miR-34c-5p/hsa-miR-449a/hsa-miR-449b-5p	hsa-miR-374a-5p	hsa-miR-424-5p	hsa-miR-92a-3p/hsa-miR-92b-3p
ZNF608	0.0240362	0.567546	0.467532	7	hsa-miR-128-3p/hsa-miR-128-3p/hsa-miR-216a-3p	hsa-miR-186-5p/hsa-miR-186-5p	hsa-miR-26a-5p	hsa-miR-27b-3p	hsa-miR-28-3p	hsa-miR-30b-5p/hsa-miR-30c-5p/hsa-miR-30d-5p	hsa-miR-423-5p
LCOR	0.0243098	0.567546	0.706494	21	hsa-let-7b-5p/hsa-let-7e-5p/hsa-let-7f-5p	hsa-miR-125a-5p/hsa-miR-125b-5p	hsa-miR-128-3p/hsa-miR-128-3p/hsa-miR-216a-3p	hsa-miR-138-5p	hsa-miR-140-5p	hsa-miR-146a-5p	hsa-miR-155-5p	hsa-miR-186-5p/hsa-miR-186-5p	hsa-miR-204-5p	hsa-miR-205-5p	hsa-miR-216b-5p	hsa-miR-27b-3p	hsa-miR-302b-3p/hsa-miR-520a-3p	hsa-miR-30b-5p/hsa-miR-30c-5p/hsa-miR-30d-5p	hsa-miR-381-3p	hsa-miR-384	hsa-miR-424-5p	hsa-miR-425-5p	hsa-miR-429	hsa-miR-494-3p	hsa-miR-92a-3p/hsa-miR-92b-3p
PTPRD	0.024907	0.567546	0.623377	14	hsa-let-7b-5p/hsa-let-7e-5p/hsa-let-7f-5p	hsa-miR-135a-5p	hsa-miR-141-3p/hsa-miR-200a-3p	hsa-miR-142-5p	hsa-miR-155-5p	hsa-miR-204-5p	hsa-miR-205-5p	hsa-miR-26a-5p	hsa-miR-29a-3p/hsa-miR-29b-3p	hsa-miR-302b-3p/hsa-miR-520a-3p	hsa-miR-34a-5p/hsa-miR-34c-5p/hsa-miR-449a/hsa-miR-449b-5p	hsa-miR-362-5p	hsa-miR-424-5p	hsa-miR-92a-3p/hsa-miR-92b-3p
ADAM9	0.0254248	0.567546	0.392727	5	hsa-miR-125a-5p/hsa-miR-125b-5p	hsa-miR-140-5p	hsa-miR-26a-5p	hsa-miR-302b-3p/hsa-miR-520a-3p	hsa-miR-30b-5p/hsa-miR-30c-5p/hsa-miR-30d-5p
AGAP2	0.0254248	0.567546	0.392727	5	hsa-miR-204-5p	hsa-miR-296-3p	hsa-miR-302b-3p/hsa-miR-520a-3p	hsa-miR-34a-5p/hsa-miR-34c-5p/hsa-miR-449a/hsa-miR-449b-5p	hsa-miR-423-5p
ANGPTL2	0.0254248	0.567546	0.392727	5	hsa-let-7b-5p/hsa-let-7e-5p/hsa-let-7f-5p	hsa-miR-135a-5p	hsa-miR-204-5p	hsa-miR-423-5p	hsa-miR-92a-3p/hsa-miR-92b-3p
B3GNT5	0.0254248	0.567546	0.392727	5	hsa-miR-141-3p/hsa-miR-200a-3p	hsa-miR-204-5p	hsa-miR-205-5p	hsa-miR-29a-3p/hsa-miR-29b-3p	hsa-miR-30b-5p/hsa-miR-30c-5p/hsa-miR-30d-5p
EMB	0.0254248	0.567546	0.392727	5	hsa-let-7b-5p/hsa-let-7e-5p/hsa-let-7f-5p	hsa-miR-216b-5p	hsa-miR-29a-3p/hsa-miR-29b-3p	hsa-miR-429	hsa-miR-9-5p
FOXJ2	0.0254248	0.567546	0.392727	5	hsa-miR-142-5p	hsa-miR-29a-3p/hsa-miR-29b-3p	hsa-miR-302b-3p/hsa-miR-520a-3p	hsa-miR-34a-5p/hsa-miR-34c-5p/hsa-miR-449a/hsa-miR-449b-5p	hsa-miR-494-3p
GOLGA7	0.0254248	0.567546	0.392727	5	hsa-let-7b-5p/hsa-let-7e-5p/hsa-let-7f-5p	hsa-miR-29a-3p/hsa-miR-29b-3p	hsa-miR-371a-5p	hsa-miR-429	hsa-miR-92a-3p/hsa-miR-92b-3p
ITM2B	0.0254248	0.567546	0.392727	5	hsa-miR-381-3p	hsa-miR-429	hsa-miR-448	hsa-miR-92a-3p/hsa-miR-92b-3p	hsa-miR-9-5p
LPAR3	0.0254248	0.567546	0.392727	5	hsa-miR-141-3p/hsa-miR-200a-3p	hsa-miR-26a-5p	hsa-miR-30b-5p/hsa-miR-30c-5p/hsa-miR-30d-5p	hsa-miR-371a-5p	hsa-miR-374a-5p
NCOR2	0.0254248	0.567546	0.392727	5	hsa-miR-125a-5p/hsa-miR-125b-5p	hsa-miR-29a-3p/hsa-miR-29b-3p	hsa-miR-424-5p	hsa-miR-429	hsa-miR-9-5p
NRBF2	0.0254248	0.567546	0.392727	5	hsa-miR-128-3p/hsa-miR-128-3p/hsa-miR-216a-3p	hsa-miR-204-5p	hsa-miR-27b-3p	hsa-miR-30b-5p/hsa-miR-30c-5p/hsa-miR-30d-5p	hsa-miR-429
PCDH9	0.0254248	0.567546	0.392727	5	hsa-miR-128-3p/hsa-miR-128-3p/hsa-miR-216a-3p	hsa-miR-135a-5p	hsa-miR-27b-3p	hsa-miR-29a-3p/hsa-miR-29b-3p	hsa-miR-9-5p
PDHX	0.0254248	0.567546	0.392727	5	hsa-miR-128-3p/hsa-miR-128-3p/hsa-miR-216a-3p	hsa-miR-135a-5p	hsa-miR-26a-5p	hsa-miR-27b-3p	hsa-miR-29a-3p/hsa-miR-29b-3p
PPAPDC2	0.0254248	0.567546	0.392727	5	hsa-let-7b-5p/hsa-let-7e-5p/hsa-let-7f-5p	hsa-miR-216b-5p	hsa-miR-30b-5p/hsa-miR-30c-5p/hsa-miR-30d-5p	hsa-miR-429	hsa-miR-9-5p
RIOK3	0.0254248	0.567546	0.392727	5	hsa-let-7b-5p/hsa-let-7e-5p/hsa-let-7f-5p	hsa-miR-186-5p/hsa-miR-186-5p	hsa-miR-27b-3p	hsa-miR-29a-3p/hsa-miR-29b-3p	hsa-miR-30b-5p/hsa-miR-30c-5p/hsa-miR-30d-5p
SIDT2	0.0254248	0.567546	0.392727	5	hsa-miR-141-3p/hsa-miR-200a-3p	hsa-miR-29a-3p/hsa-miR-29b-3p	hsa-miR-30b-5p/hsa-miR-30c-5p/hsa-miR-30d-5p	hsa-miR-34a-5p/hsa-miR-34c-5p/hsa-miR-449a/hsa-miR-449b-5p	hsa-miR-424-5p
SOX7	0.0254248	0.567546	0.392727	5	hsa-miR-128-3p/hsa-miR-128-3p/hsa-miR-216a-3p	hsa-miR-21-5p	hsa-miR-27b-3p	hsa-miR-422a	hsa-miR-494-3p
ARL4A	0.0255855	0.567546	0.436364	6	hsa-miR-141-3p/hsa-miR-200a-3p	hsa-miR-142-5p	hsa-miR-29a-3p/hsa-miR-29b-3p	hsa-miR-30b-5p/hsa-miR-30c-5p/hsa-miR-30d-5p	hsa-miR-362-3p	hsa-miR-362-5p
DOT1L	0.0255855	0.567546	0.436364	6	hsa-miR-128-3p/hsa-miR-128-3p/hsa-miR-216a-3p	hsa-miR-27b-3p	hsa-miR-29a-3p/hsa-miR-29b-3p	hsa-miR-429	hsa-miR-448	hsa-miR-9-5p
FAM133B	0.0255855	0.567546	0.436364	6	hsa-miR-128-3p/hsa-miR-128-3p/hsa-miR-216a-3p	hsa-miR-27b-3p	hsa-miR-424-5p	hsa-miR-425-5p	hsa-miR-448	hsa-miR-92a-3p/hsa-miR-92b-3p
FBXO10	0.0255855	0.567546	0.436364	6	hsa-miR-125a-5p/hsa-miR-125b-5p	hsa-miR-138-5p	hsa-miR-27b-3p	hsa-miR-302b-3p/hsa-miR-520a-3p	hsa-miR-34a-5p/hsa-miR-34c-5p/hsa-miR-449a/hsa-miR-449b-5p	hsa-miR-424-5p
GCC2	0.0255855	0.567546	0.436364	6	hsa-miR-128-3p/hsa-miR-128-3p/hsa-miR-216a-3p	hsa-miR-142-5p	hsa-miR-186-5p/hsa-miR-186-5p	hsa-miR-205-5p	hsa-miR-27b-3p	hsa-miR-424-5p
GCNT2	0.0255855	0.567546	0.436364	6	hsa-miR-128-3p/hsa-miR-128-3p/hsa-miR-216a-3p	hsa-miR-135a-5p	hsa-miR-141-3p/hsa-miR-200a-3p	hsa-miR-204-5p	hsa-miR-27b-3p	hsa-miR-30b-5p/hsa-miR-30c-5p/hsa-miR-30d-5p
MARCH1	0.0255855	0.567546	0.436364	6	hsa-miR-138-5p	hsa-miR-141-3p/hsa-miR-200a-3p	hsa-miR-27b-3p	hsa-miR-29a-3p/hsa-miR-29b-3p	hsa-miR-381-3p	hsa-miR-9-5p
MYOCD	0.0255855	0.567546	0.436364	6	hsa-miR-128-3p/hsa-miR-128-3p/hsa-miR-216a-3p	hsa-miR-135a-5p	hsa-miR-27b-3p	hsa-miR-302b-3p/hsa-miR-520a-3p	hsa-miR-34a-5p/hsa-miR-34c-5p/hsa-miR-449a/hsa-miR-449b-5p	hsa-miR-9-5p
NECAB1	0.0255855	0.567546	0.436364	6	hsa-miR-141-3p/hsa-miR-200a-3p	hsa-miR-142-5p	hsa-miR-186-5p/hsa-miR-186-5p	hsa-miR-30b-5p/hsa-miR-30c-5p/hsa-miR-30d-5p	hsa-miR-371a-5p	hsa-miR-7-5p
PDCD6IP	0.0255855	0.567546	0.436364	6	hsa-miR-186-5p/hsa-miR-186-5p	hsa-miR-216a-5p	hsa-miR-216b-5p	hsa-miR-424-5p	hsa-miR-92a-3p/hsa-miR-92b-3p	hsa-miR-9-5p
PI15	0.0255855	0.567546	0.436364	6	hsa-miR-100-5p	hsa-miR-21-5p	hsa-miR-29a-3p/hsa-miR-29b-3p	hsa-miR-374a-5p	hsa-miR-381-3p	hsa-miR-455-5p
PRELP	0.0255855	0.567546	0.436364	6	hsa-miR-26a-5p	hsa-miR-296-5p	hsa-miR-29a-3p/hsa-miR-29b-3p	hsa-miR-362-3p	hsa-miR-362-5p	hsa-miR-424-5p
PRRG1	0.0255855	0.567546	0.436364	6	hsa-miR-140-5p	hsa-miR-204-5p	hsa-miR-302b-3p/hsa-miR-520a-3p	hsa-miR-30b-5p/hsa-miR-30c-5p/hsa-miR-30d-5p	hsa-miR-374a-5p	hsa-miR-494-3p
REEP3	0.0255855	0.567546	0.436364	6	hsa-miR-125a-5p/hsa-miR-125b-5p	hsa-miR-141-3p/hsa-miR-200a-3p	hsa-miR-26a-5p	hsa-miR-302b-3p/hsa-miR-520a-3p	hsa-miR-30b-5p/hsa-miR-30c-5p/hsa-miR-30d-5p	hsa-miR-9-5p
SEMA4C	0.0255855	0.567546	0.436364	6	hsa-let-7b-5p/hsa-let-7e-5p/hsa-let-7f-5p	hsa-miR-125a-5p/hsa-miR-125b-5p	hsa-miR-138-5p	hsa-miR-205-5p	hsa-miR-34a-5p/hsa-miR-34c-5p/hsa-miR-449a/hsa-miR-449b-5p	hsa-miR-7-5p
SIAH1	0.0255855	0.567546	0.436364	6	hsa-miR-135a-5p	hsa-miR-140-5p	hsa-miR-141-3p/hsa-miR-200a-3p	hsa-miR-205-5p	hsa-miR-424-5p	hsa-miR-429
SIPA1L3	0.0255855	0.567546	0.436364	6	hsa-miR-128-3p/hsa-miR-128-3p/hsa-miR-216a-3p	hsa-miR-186-5p/hsa-miR-186-5p	hsa-miR-216a-5p	hsa-miR-27b-3p	hsa-miR-302b-3p/hsa-miR-520a-3p	hsa-miR-494-3p
SMIM13	0.0255855	0.567546	0.436364	6	hsa-let-7b-5p/hsa-let-7e-5p/hsa-let-7f-5p	hsa-miR-135a-5p	hsa-miR-155-5p	hsa-miR-204-5p	hsa-miR-424-5p	hsa-miR-501-3p
TMEM86A	0.0255855	0.567546	0.436364	6	hsa-miR-125a-5p/hsa-miR-125b-5p	hsa-miR-204-5p	hsa-miR-26a-5p	hsa-miR-29a-3p/hsa-miR-29b-3p	hsa-miR-30b-5p/hsa-miR-30c-5p/hsa-miR-30d-5p	hsa-miR-455-5p
ZIC5	0.0255855	0.567546	0.436364	6	hsa-miR-186-5p/hsa-miR-186-5p	hsa-miR-26a-5p	hsa-miR-27b-3p	hsa-miR-29a-3p/hsa-miR-29b-3p	hsa-miR-34a-5p/hsa-miR-34c-5p/hsa-miR-449a/hsa-miR-449b-5p	hsa-miR-9-5p
ZBTB7A	0.0257421	0.567546	0.64	15	hsa-miR-100-5p	hsa-miR-125a-5p/hsa-miR-125b-5p	hsa-miR-140-5p	hsa-miR-142-5p	hsa-miR-186-5p/hsa-miR-186-5p	hsa-miR-204-5p	hsa-miR-216a-5p	hsa-miR-216b-5p	hsa-miR-296-5p	hsa-miR-302b-3p/hsa-miR-520a-3p	hsa-miR-30b-5p/hsa-miR-30c-5p/hsa-miR-30d-5p	hsa-miR-371a-5p	hsa-miR-423-3p	hsa-miR-448	hsa-miR-9-5p
DCAF7	0.0261928	0.567546	0.575207	11	hsa-miR-128-3p/hsa-miR-128-3p/hsa-miR-216a-3p	hsa-miR-21-5p	hsa-miR-26a-5p	hsa-miR-27b-3p	hsa-miR-29a-3p/hsa-miR-29b-3p	hsa-miR-302b-3p/hsa-miR-520a-3p	hsa-miR-34a-5p/hsa-miR-34c-5p/hsa-miR-449a/hsa-miR-449b-5p	hsa-miR-381-3p	hsa-miR-424-5p	hsa-miR-429	hsa-miR-494-3p
AGO2	0.0269962	0.567546	0.533333	9	hsa-miR-100-5p	hsa-miR-125a-5p/hsa-miR-125b-5p	hsa-miR-128-3p/hsa-miR-128-3p/hsa-miR-216a-3p	hsa-miR-151a-3p	hsa-miR-21-5p	hsa-miR-27b-3p	hsa-miR-30b-5p/hsa-miR-30c-5p/hsa-miR-30d-5p	hsa-miR-384	hsa-miR-429
BICC1	0.0269962	0.567546	0.533333	9	hsa-miR-128-3p/hsa-miR-128-3p/hsa-miR-216a-3p	hsa-miR-140-5p	hsa-miR-204-5p	hsa-miR-205-5p	hsa-miR-27b-3p	hsa-miR-302b-3p/hsa-miR-520a-3p	hsa-miR-374a-5p	hsa-miR-429	hsa-miR-9-5p
CTDSP2	0.0269962	0.567546	0.533333	9	hsa-miR-125a-5p/hsa-miR-125b-5p	hsa-miR-128-3p/hsa-miR-128-3p/hsa-miR-216a-3p	hsa-miR-135a-5p	hsa-miR-26a-5p	hsa-miR-27b-3p	hsa-miR-34a-5p/hsa-miR-34c-5p/hsa-miR-449a/hsa-miR-449b-5p	hsa-miR-424-5p	hsa-miR-7-5p	hsa-miR-9-5p
FAM126A	0.0269962	0.567546	0.533333	9	hsa-miR-128-3p/hsa-miR-128-3p/hsa-miR-216a-3p	hsa-miR-142-5p	hsa-miR-155-5p	hsa-miR-186-5p/hsa-miR-186-5p	hsa-miR-204-5p	hsa-miR-27b-3p	hsa-miR-30b-5p/hsa-miR-30c-5p/hsa-miR-30d-5p	hsa-miR-384	hsa-miR-429
FRMD5	0.0269962	0.567546	0.533333	9	hsa-let-7b-5p/hsa-let-7e-5p/hsa-let-7f-5p	hsa-miR-125a-5p/hsa-miR-125b-5p	hsa-miR-142-5p	hsa-miR-204-5p	hsa-miR-216b-5p	hsa-miR-34a-5p/hsa-miR-34c-5p/hsa-miR-449a/hsa-miR-449b-5p	hsa-miR-429	hsa-miR-448	hsa-miR-455-5p
KCNA1	0.0269962	0.567546	0.533333	9	hsa-miR-125a-5p/hsa-miR-125b-5p	hsa-miR-128-3p/hsa-miR-128-3p/hsa-miR-216a-3p	hsa-miR-155-5p	hsa-miR-204-5p	hsa-miR-21-5p	hsa-miR-302b-3p/hsa-miR-520a-3p	hsa-miR-501-3p	hsa-miR-92a-3p/hsa-miR-92b-3p	hsa-miR-9-5p
KMT2C	0.0269962	0.567546	0.533333	9	hsa-miR-128-3p/hsa-miR-128-3p/hsa-miR-216a-3p	hsa-miR-138-5p	hsa-miR-141-3p/hsa-miR-200a-3p	hsa-miR-26a-5p	hsa-miR-27b-3p	hsa-miR-302b-3p/hsa-miR-520a-3p	hsa-miR-30b-5p/hsa-miR-30c-5p/hsa-miR-30d-5p	hsa-miR-424-5p	hsa-miR-429
MFAP3L	0.0269962	0.567546	0.533333	9	hsa-let-7b-5p/hsa-let-7e-5p/hsa-let-7f-5p	hsa-miR-186-5p/hsa-miR-186-5p	hsa-miR-26a-5p	hsa-miR-302b-3p/hsa-miR-520a-3p	hsa-miR-30b-5p/hsa-miR-30c-5p/hsa-miR-30d-5p	hsa-miR-374a-5p	hsa-miR-384	hsa-miR-455-5p	hsa-miR-9-5p
UBR1	0.0269962	0.567546	0.533333	9	hsa-miR-128-3p/hsa-miR-128-3p/hsa-miR-216a-3p	hsa-miR-155-5p	hsa-miR-205-5p	hsa-miR-216a-5p	hsa-miR-216b-5p	hsa-miR-26a-5p	hsa-miR-27b-3p	hsa-miR-381-3p	hsa-miR-92a-3p/hsa-miR-92b-3p
ELAVL4	0.0285655	0.567546	0.6	12	hsa-miR-125a-5p/hsa-miR-125b-5p	hsa-miR-141-3p/hsa-miR-200a-3p	hsa-miR-142-5p	hsa-miR-155-5p	hsa-miR-204-5p	hsa-miR-205-5p	hsa-miR-29a-3p/hsa-miR-29b-3p	hsa-miR-30b-5p/hsa-miR-30c-5p/hsa-miR-30d-5p	hsa-miR-374a-5p	hsa-miR-425-5p	hsa-miR-429	hsa-miR-9-5p
NCOA1	0.0285655	0.567546	0.6	12	hsa-let-7b-5p/hsa-let-7e-5p/hsa-let-7f-5p	hsa-miR-128-3p/hsa-miR-128-3p/hsa-miR-216a-3p	hsa-miR-135a-5p	hsa-miR-138-5p	hsa-miR-140-5p	hsa-miR-205-5p	hsa-miR-216a-5p	hsa-miR-27b-3p	hsa-miR-34a-5p/hsa-miR-34c-5p/hsa-miR-449a/hsa-miR-449b-5p	hsa-miR-362-3p	hsa-miR-374a-5p	hsa-miR-92a-3p/hsa-miR-92b-3p
APC	0.0302956	0.567546	0.620979	13	hsa-miR-125a-5p/hsa-miR-125b-5p	hsa-miR-135a-5p	hsa-miR-155-5p	hsa-miR-26a-5p	hsa-miR-27b-3p	hsa-miR-29a-3p/hsa-miR-29b-3p	hsa-miR-302b-3p/hsa-miR-520a-3p	hsa-miR-374a-5p	hsa-miR-381-3p	hsa-miR-424-5p	hsa-miR-448	hsa-miR-494-3p	hsa-miR-501-3p
DCX	0.0302956	0.567546	0.620979	13	hsa-let-7b-5p/hsa-let-7e-5p/hsa-let-7f-5p	hsa-miR-128-3p/hsa-miR-128-3p/hsa-miR-216a-3p	hsa-miR-141-3p/hsa-miR-200a-3p	hsa-miR-204-5p	hsa-miR-27b-3p	hsa-miR-29a-3p/hsa-miR-29b-3p	hsa-miR-302b-3p/hsa-miR-520a-3p	hsa-miR-30b-5p/hsa-miR-30c-5p/hsa-miR-30d-5p	hsa-miR-34a-5p/hsa-miR-34c-5p/hsa-miR-449a/hsa-miR-449b-5p	hsa-miR-362-3p	hsa-miR-362-5p	hsa-miR-422a	hsa-miR-92a-3p/hsa-miR-92b-3p
MARCKS	0.0302956	0.567546	0.620979	13	hsa-miR-128-3p/hsa-miR-128-3p/hsa-miR-216a-3p	hsa-miR-138-5p	hsa-miR-204-5p	hsa-miR-205-5p	hsa-miR-216a-5p	hsa-miR-216b-5p	hsa-miR-27b-3p	hsa-miR-30b-5p/hsa-miR-30c-5p/hsa-miR-30d-5p	hsa-miR-371a-5p	hsa-miR-381-3p	hsa-miR-429	hsa-miR-501-3p	hsa-miR-9-5p
ATAD2B	0.0311588	0.567546	0.567273	10	hsa-let-7b-5p/hsa-let-7e-5p/hsa-let-7f-5p	hsa-miR-141-3p/hsa-miR-200a-3p	hsa-miR-155-5p	hsa-miR-26a-5p	hsa-miR-27b-3p	hsa-miR-29a-3p/hsa-miR-29b-3p	hsa-miR-302b-3p/hsa-miR-520a-3p	hsa-miR-30b-5p/hsa-miR-30c-5p/hsa-miR-30d-5p	hsa-miR-429	hsa-miR-448
DCAF12	0.0311588	0.567546	0.567273	10	hsa-miR-142-5p	hsa-miR-146a-5p	hsa-miR-216a-5p	hsa-miR-216b-5p	hsa-miR-27b-3p	hsa-miR-29a-3p/hsa-miR-29b-3p	hsa-miR-302b-3p/hsa-miR-520a-3p	hsa-miR-371a-5p	hsa-miR-381-3p	hsa-miR-422a
RP11-766F14.2	0.0311588	0.567546	0.567273	10	hsa-let-7b-5p/hsa-let-7e-5p/hsa-let-7f-5p	hsa-miR-125a-5p/hsa-miR-125b-5p	hsa-miR-138-5p	hsa-miR-21-5p	hsa-miR-26a-5p	hsa-miR-29a-3p/hsa-miR-29b-3p	hsa-miR-30b-5p/hsa-miR-30c-5p/hsa-miR-30d-5p	hsa-miR-362-3p	hsa-miR-501-3p	hsa-miR-92a-3p/hsa-miR-92b-3p
TMEM135	0.0311588	0.567546	0.567273	10	hsa-let-7b-5p/hsa-let-7e-5p/hsa-let-7f-5p	hsa-miR-100-5p	hsa-miR-125a-5p/hsa-miR-125b-5p	hsa-miR-141-3p/hsa-miR-200a-3p	hsa-miR-216a-5p	hsa-miR-26a-5p	hsa-miR-296-5p	hsa-miR-30b-5p/hsa-miR-30c-5p/hsa-miR-30d-5p	hsa-miR-424-5p	hsa-miR-494-3p
ZBTB37	0.0311588	0.567546	0.567273	10	hsa-let-7b-5p/hsa-let-7e-5p/hsa-let-7f-5p	hsa-miR-125a-5p/hsa-miR-125b-5p	hsa-miR-128-3p/hsa-miR-128-3p/hsa-miR-216a-3p	hsa-miR-142-5p	hsa-miR-26a-5p	hsa-miR-27b-3p	hsa-miR-29a-3p/hsa-miR-29b-3p	hsa-miR-371a-5p	hsa-miR-424-5p	hsa-miR-9-5p
FOXG1	0.0311984	0.567546	0.518182	8	hsa-miR-21-5p	hsa-miR-30b-5p/hsa-miR-30c-5p/hsa-miR-30d-5p	hsa-miR-34a-5p/hsa-miR-34c-5p/hsa-miR-449a/hsa-miR-449b-5p	hsa-miR-374a-5p	hsa-miR-422a	hsa-miR-429	hsa-miR-92a-3p/hsa-miR-92b-3p	hsa-miR-9-5p
FOXP4	0.0311984	0.567546	0.518182	8	hsa-miR-128-3p/hsa-miR-128-3p/hsa-miR-216a-3p	hsa-miR-138-5p	hsa-miR-27b-3p	hsa-miR-296-5p	hsa-miR-30b-5p/hsa-miR-30c-5p/hsa-miR-30d-5p	hsa-miR-423-5p	hsa-miR-92a-3p/hsa-miR-92b-3p	hsa-miR-9-5p
KCNJ3	0.0311984	0.567546	0.518182	8	hsa-let-7b-5p/hsa-let-7e-5p/hsa-let-7f-5p	hsa-miR-128-3p/hsa-miR-128-3p/hsa-miR-216a-3p	hsa-miR-135a-5p	hsa-miR-142-5p	hsa-miR-27b-3p	hsa-miR-30b-5p/hsa-miR-30c-5p/hsa-miR-30d-5p	hsa-miR-381-3p	hsa-miR-92a-3p/hsa-miR-92b-3p
KLF4	0.0311984	0.567546	0.518182	8	hsa-miR-128-3p/hsa-miR-128-3p/hsa-miR-216a-3p	hsa-miR-135a-5p	hsa-miR-26a-5p	hsa-miR-29a-3p/hsa-miR-29b-3p	hsa-miR-34a-5p/hsa-miR-34c-5p/hsa-miR-449a/hsa-miR-449b-5p	hsa-miR-429	hsa-miR-7-5p	hsa-miR-92a-3p/hsa-miR-92b-3p
MEX3B	0.0311984	0.567546	0.518182	8	hsa-miR-155-5p	hsa-miR-186-5p/hsa-miR-186-5p	hsa-miR-26a-5p	hsa-miR-29a-3p/hsa-miR-29b-3p	hsa-miR-302b-3p/hsa-miR-520a-3p	hsa-miR-30b-5p/hsa-miR-30c-5p/hsa-miR-30d-5p	hsa-miR-374a-5p	hsa-miR-429
MPRIP	0.0311984	0.567546	0.518182	8	hsa-miR-138-5p	hsa-miR-141-3p/hsa-miR-200a-3p	hsa-miR-205-5p	hsa-miR-21-5p	hsa-miR-26a-5p	hsa-miR-384	hsa-miR-423-5p	hsa-miR-429
PITPNM3	0.0311984	0.567546	0.518182	8	hsa-let-7b-5p/hsa-let-7e-5p/hsa-let-7f-5p	hsa-miR-138-5p	hsa-miR-155-5p	hsa-miR-29a-3p/hsa-miR-29b-3p	hsa-miR-30b-5p/hsa-miR-30c-5p/hsa-miR-30d-5p	hsa-miR-424-5p	hsa-miR-429	hsa-miR-9-5p
RCAN2	0.0311984	0.567546	0.518182	8	hsa-miR-128-3p/hsa-miR-128-3p/hsa-miR-216a-3p	hsa-miR-138-5p	hsa-miR-27b-3p	hsa-miR-371a-5p	hsa-miR-381-3p	hsa-miR-384	hsa-miR-494-3p	hsa-miR-9-5p
SRCAP	0.0311984	0.567546	0.518182	8	hsa-miR-140-5p	hsa-miR-141-3p/hsa-miR-200a-3p	hsa-miR-155-5p	hsa-miR-26a-5p	hsa-miR-296-5p	hsa-miR-371a-5p	hsa-miR-424-5p	hsa-miR-9-5p
WWC1	0.0311984	0.567546	0.518182	8	hsa-miR-138-5p	hsa-miR-155-5p	hsa-miR-205-5p	hsa-miR-27b-3p	hsa-miR-381-3p	hsa-miR-423-5p	hsa-miR-424-5p	hsa-miR-92a-3p/hsa-miR-92b-3p
AFF4	0.0314651	0.567546	0.638961	14	hsa-miR-128-3p/hsa-miR-128-3p/hsa-miR-216a-3p	hsa-miR-142-5p	hsa-miR-205-5p	hsa-miR-27b-3p	hsa-miR-29a-3p/hsa-miR-29b-3p	hsa-miR-30b-5p/hsa-miR-30c-5p/hsa-miR-30d-5p	hsa-miR-34a-5p/hsa-miR-34c-5p/hsa-miR-449a/hsa-miR-449b-5p	hsa-miR-374a-5p	hsa-miR-381-3p	hsa-miR-424-5p	hsa-miR-425-5p	hsa-miR-429	hsa-miR-501-3p	hsa-miR-92a-3p/hsa-miR-92b-3p
SAMD12	0.0314651	0.567546	0.638961	14	hsa-let-7b-5p/hsa-let-7e-5p/hsa-let-7f-5p	hsa-miR-128-3p/hsa-miR-128-3p/hsa-miR-216a-3p	hsa-miR-138-5p	hsa-miR-142-5p	hsa-miR-155-5p	hsa-miR-186-5p/hsa-miR-186-5p	hsa-miR-204-5p	hsa-miR-26a-5p	hsa-miR-302b-3p/hsa-miR-520a-3p	hsa-miR-34a-5p/hsa-miR-34c-5p/hsa-miR-449a/hsa-miR-449b-5p	hsa-miR-381-3p	hsa-miR-384	hsa-miR-448	hsa-miR-501-3p
NFAT5	0.0319301	0.567546	0.690909	18	hsa-miR-128-3p/hsa-miR-128-3p/hsa-miR-216a-3p	hsa-miR-135a-5p	hsa-miR-138-5p	hsa-miR-140-5p	hsa-miR-142-5p	hsa-miR-155-5p	hsa-miR-186-5p/hsa-miR-186-5p	hsa-miR-204-5p	hsa-miR-205-5p	hsa-miR-21-5p	hsa-miR-27b-3p	hsa-miR-29a-3p/hsa-miR-29b-3p	hsa-miR-30b-5p/hsa-miR-30c-5p/hsa-miR-30d-5p	hsa-miR-381-3p	hsa-miR-384	hsa-miR-494-3p	hsa-miR-7-5p	hsa-miR-92a-3p/hsa-miR-92b-3p
C10orf137	0.0333747	0.567546	0.290909	3	hsa-miR-128-3p/hsa-miR-128-3p/hsa-miR-216a-3p	hsa-miR-26a-5p	hsa-miR-27b-3p
C19orf81	0.0333747	0.567546	0.290909	3	hsa-miR-128-3p/hsa-miR-128-3p/hsa-miR-216a-3p	hsa-miR-27b-3p	hsa-miR-374a-5p
C3orf18	0.0333747	0.567546	0.290909	3	hsa-miR-155-5p	hsa-miR-302b-3p/hsa-miR-520a-3p	hsa-miR-30b-5p/hsa-miR-30c-5p/hsa-miR-30d-5p
CCDC28B	0.0333747	0.567546	0.290909	3	hsa-miR-128-3p/hsa-miR-128-3p/hsa-miR-216a-3p	hsa-miR-27b-3p	hsa-miR-29a-3p/hsa-miR-29b-3p
CDKN2C	0.0333747	0.567546	0.290909	3	hsa-miR-135a-5p	hsa-miR-21-5p	hsa-miR-384
CEBPD	0.0333747	0.567546	0.290909	3	hsa-let-7b-5p/hsa-let-7e-5p/hsa-let-7f-5p	hsa-miR-142-5p	hsa-miR-429
CHAF1A	0.0333747	0.567546	0.290909	3	hsa-miR-155-5p	hsa-miR-26a-5p	hsa-miR-302b-3p/hsa-miR-520a-3p
CHST9	0.0333747	0.567546	0.290909	3	hsa-miR-204-5p	hsa-miR-429	hsa-miR-9-5p
COL11A2	0.0333747	0.567546	0.290909	3	hsa-miR-125a-5p/hsa-miR-125b-5p	hsa-miR-128-3p/hsa-miR-128-3p/hsa-miR-216a-3p	hsa-miR-27b-3p
COL9A3	0.0333747	0.567546	0.290909	3	hsa-let-7b-5p/hsa-let-7e-5p/hsa-let-7f-5p	hsa-miR-30b-5p/hsa-miR-30c-5p/hsa-miR-30d-5p	hsa-miR-429
CTPS1	0.0333747	0.567546	0.290909	3	hsa-let-7b-5p/hsa-let-7e-5p/hsa-let-7f-5p	hsa-miR-29a-3p/hsa-miR-29b-3p	hsa-miR-30b-5p/hsa-miR-30c-5p/hsa-miR-30d-5p
CYP1B1	0.0333747	0.567546	0.290909	3	hsa-miR-27b-3p	hsa-miR-362-5p	hsa-miR-429
DSC2	0.0333747	0.567546	0.290909	3	hsa-miR-205-5p	hsa-miR-29a-3p/hsa-miR-29b-3p	hsa-miR-92a-3p/hsa-miR-92b-3p
FAM105A	0.0333747	0.567546	0.290909	3	hsa-miR-140-5p	hsa-miR-155-5p	hsa-miR-186-5p/hsa-miR-186-5p
FAM210A	0.0333747	0.567546	0.290909	3	hsa-miR-146a-5p	hsa-miR-216a-5p	hsa-miR-26a-5p
GADD45GIP1	0.0333747	0.567546	0.290909	3	hsa-miR-142-5p	hsa-miR-296-5p	hsa-miR-30b-5p/hsa-miR-30c-5p/hsa-miR-30d-5p
GIPC2	0.0333747	0.567546	0.290909	3	hsa-miR-186-5p/hsa-miR-186-5p	hsa-miR-384	hsa-miR-494-3p
GOLGA6L10	0.0333747	0.567546	0.290909	3	hsa-miR-128-3p/hsa-miR-128-3p/hsa-miR-216a-3p	hsa-miR-27b-3p	hsa-miR-30b-5p/hsa-miR-30c-5p/hsa-miR-30d-5p
GOLGA6L4	0.0333747	0.567546	0.290909	3	hsa-miR-128-3p/hsa-miR-128-3p/hsa-miR-216a-3p	hsa-miR-27b-3p	hsa-miR-30b-5p/hsa-miR-30c-5p/hsa-miR-30d-5p
HERC2	0.0333747	0.567546	0.290909	3	hsa-miR-30b-5p/hsa-miR-30c-5p/hsa-miR-30d-5p	hsa-miR-374a-5p	hsa-miR-92a-3p/hsa-miR-92b-3p
HLX	0.0333747	0.567546	0.290909	3	hsa-miR-128-3p/hsa-miR-128-3p/hsa-miR-216a-3p	hsa-miR-27b-3p	hsa-miR-30b-5p/hsa-miR-30c-5p/hsa-miR-30d-5p
IKBKE	0.0333747	0.567546	0.290909	3	hsa-let-7b-5p/hsa-let-7e-5p/hsa-let-7f-5p	hsa-miR-155-5p	hsa-miR-7-5p
LOXL2	0.0333747	0.567546	0.290909	3	hsa-miR-26a-5p	hsa-miR-29a-3p/hsa-miR-29b-3p	hsa-miR-425-5p
LRRC10B	0.0333747	0.567546	0.290909	3	hsa-let-7b-5p/hsa-let-7e-5p/hsa-let-7f-5p	hsa-miR-125a-5p/hsa-miR-125b-5p	hsa-miR-186-5p/hsa-miR-186-5p
MAP9	0.0333747	0.567546	0.290909	3	hsa-miR-135a-5p	hsa-miR-142-5p	hsa-miR-26a-5p
MNAT1	0.0333747	0.567546	0.290909	3	hsa-miR-141-3p/hsa-miR-200a-3p	hsa-miR-26a-5p	hsa-miR-422a
MYBL2	0.0333747	0.567546	0.290909	3	hsa-miR-29a-3p/hsa-miR-29b-3p	hsa-miR-30b-5p/hsa-miR-30c-5p/hsa-miR-30d-5p	hsa-miR-423-5p
NFX1	0.0333747	0.567546	0.290909	3	hsa-miR-128-3p/hsa-miR-128-3p/hsa-miR-216a-3p	hsa-miR-27b-3p	hsa-miR-422a
NSFL1C	0.0333747	0.567546	0.290909	3	hsa-miR-138-5p	hsa-miR-205-5p	hsa-miR-422a
ORAI2	0.0333747	0.567546	0.290909	3	hsa-miR-29a-3p/hsa-miR-29b-3p	hsa-miR-384	hsa-miR-9-5p
PDSS1	0.0333747	0.567546	0.290909	3	hsa-let-7b-5p/hsa-let-7e-5p/hsa-let-7f-5p	hsa-miR-30b-5p/hsa-miR-30c-5p/hsa-miR-30d-5p	hsa-miR-34a-5p/hsa-miR-34c-5p/hsa-miR-449a/hsa-miR-449b-5p
PGAP3	0.0333747	0.567546	0.290909	3	hsa-miR-125a-5p/hsa-miR-125b-5p	hsa-miR-140-5p	hsa-miR-205-5p
PHF16	0.0333747	0.567546	0.290909	3	hsa-miR-205-5p	hsa-miR-30b-5p/hsa-miR-30c-5p/hsa-miR-30d-5p	hsa-miR-429
POFUT2	0.0333747	0.567546	0.290909	3	hsa-miR-186-5p/hsa-miR-186-5p	hsa-miR-92a-3p/hsa-miR-92b-3p	hsa-miR-9-5p
POLR1D	0.0333747	0.567546	0.290909	3	hsa-miR-216b-5p	hsa-miR-29a-3p/hsa-miR-29b-3p	hsa-miR-30b-5p/hsa-miR-30c-5p/hsa-miR-30d-5p
RNFT1	0.0333747	0.567546	0.290909	3	hsa-let-7b-5p/hsa-let-7e-5p/hsa-let-7f-5p	hsa-miR-141-3p/hsa-miR-200a-3p	hsa-miR-21-5p
RP13-996F3.4	0.0333747	0.567546	0.290909	3	hsa-miR-128-3p/hsa-miR-128-3p/hsa-miR-216a-3p	hsa-miR-27b-3p	hsa-miR-30b-5p/hsa-miR-30c-5p/hsa-miR-30d-5p
RP13-996F3.5	0.0333747	0.567546	0.290909	3	hsa-miR-128-3p/hsa-miR-128-3p/hsa-miR-216a-3p	hsa-miR-27b-3p	hsa-miR-30b-5p/hsa-miR-30c-5p/hsa-miR-30d-5p
SFSWAP	0.0333747	0.567546	0.290909	3	hsa-miR-138-5p	hsa-miR-27b-3p	hsa-miR-494-3p
SLC25A27	0.0333747	0.567546	0.290909	3	hsa-let-7b-5p/hsa-let-7e-5p/hsa-let-7f-5p	hsa-miR-302b-3p/hsa-miR-520a-3p	hsa-miR-34a-5p/hsa-miR-34c-5p/hsa-miR-449a/hsa-miR-449b-5p
SLC35A5	0.0333747	0.567546	0.290909	3	hsa-miR-30b-5p/hsa-miR-30c-5p/hsa-miR-30d-5p	hsa-miR-381-3p	hsa-miR-7-5p
SQSTM1	0.0333747	0.567546	0.290909	3	hsa-miR-135a-5p	hsa-miR-302b-3p/hsa-miR-520a-3p	hsa-miR-7-5p
SRP72	0.0333747	0.567546	0.290909	3	hsa-miR-128-3p/hsa-miR-128-3p/hsa-miR-216a-3p	hsa-miR-424-5p	hsa-miR-429
STARD9	0.0333747	0.567546	0.290909	3	hsa-let-7b-5p/hsa-let-7e-5p/hsa-let-7f-5p	hsa-miR-29a-3p/hsa-miR-29b-3p	hsa-miR-424-5p
STX1A	0.0333747	0.567546	0.290909	3	hsa-miR-34a-5p/hsa-miR-34c-5p/hsa-miR-449a/hsa-miR-449b-5p	hsa-miR-429	hsa-miR-9-5p
TBP	0.0333747	0.567546	0.290909	3	hsa-miR-27b-3p	hsa-miR-424-5p	hsa-miR-429
TMEM70	0.0333747	0.567546	0.290909	3	hsa-miR-135a-5p	hsa-miR-141-3p/hsa-miR-200a-3p	hsa-miR-494-3p
TMSB10	0.0333747	0.567546	0.290909	3	hsa-miR-128-3p/hsa-miR-128-3p/hsa-miR-216a-3p	hsa-miR-27b-3p	hsa-miR-374a-5p
TRIM36	0.0333747	0.567546	0.290909	3	hsa-miR-142-5p	hsa-miR-302b-3p/hsa-miR-520a-3p	hsa-miR-92a-3p/hsa-miR-92b-3p
TRMT2A	0.0333747	0.567546	0.290909	3	hsa-miR-128-3p/hsa-miR-128-3p/hsa-miR-216a-3p	hsa-miR-27b-3p	hsa-miR-371a-5p
TRMT5	0.0333747	0.567546	0.290909	3	hsa-miR-21-5p	hsa-miR-30b-5p/hsa-miR-30c-5p/hsa-miR-30d-5p	hsa-miR-384
UBE2NL	0.0333747	0.567546	0.290909	3	hsa-miR-128-3p/hsa-miR-128-3p/hsa-miR-216a-3p	hsa-miR-205-5p	hsa-miR-27b-3p
UBE4B	0.0333747	0.567546	0.290909	3	hsa-miR-26a-5p	hsa-miR-424-5p	hsa-miR-9-5p
UBQLN1	0.0333747	0.567546	0.290909	3	hsa-miR-425-5p	hsa-miR-429	hsa-miR-494-3p
UNC5A	0.0333747	0.567546	0.290909	3	hsa-let-7b-5p/hsa-let-7e-5p/hsa-let-7f-5p	hsa-miR-138-5p	hsa-miR-448
UPP2	0.0333747	0.567546	0.290909	3	hsa-miR-151a-3p	hsa-miR-155-5p	hsa-miR-448
XKR8	0.0333747	0.567546	0.290909	3	hsa-let-7b-5p/hsa-let-7e-5p/hsa-let-7f-5p	hsa-miR-21-5p	hsa-miR-429
ZFYVE21	0.0333747	0.567546	0.290909	3	hsa-miR-142-5p	hsa-miR-381-3p	hsa-miR-92a-3p/hsa-miR-92b-3p
ZNF304	0.0333747	0.567546	0.290909	3	hsa-miR-125a-5p/hsa-miR-125b-5p	hsa-miR-135a-5p	hsa-miR-34a-5p/hsa-miR-34c-5p/hsa-miR-449a/hsa-miR-449b-5p
PAG1	0.0343394	0.567546	0.595041	11	hsa-let-7b-5p/hsa-let-7e-5p/hsa-let-7f-5p	hsa-miR-21-5p	hsa-miR-26a-5p	hsa-miR-29a-3p/hsa-miR-29b-3p	hsa-miR-302b-3p/hsa-miR-520a-3p	hsa-miR-30b-5p/hsa-miR-30c-5p/hsa-miR-30d-5p	hsa-miR-34a-5p/hsa-miR-34c-5p/hsa-miR-449a/hsa-miR-449b-5p	hsa-miR-422a	hsa-miR-424-5p	hsa-miR-429	hsa-miR-455-5p
ULK2	0.0343394	0.567546	0.595041	11	hsa-let-7b-5p/hsa-let-7e-5p/hsa-let-7f-5p	hsa-miR-135a-5p	hsa-miR-141-3p/hsa-miR-200a-3p	hsa-miR-155-5p	hsa-miR-216b-5p	hsa-miR-26a-5p	hsa-miR-384	hsa-miR-429	hsa-miR-494-3p	hsa-miR-7-5p	hsa-miR-9-5p
DCAF5	0.0355203	0.567546	0.498701	7	hsa-miR-142-5p	hsa-miR-302b-3p/hsa-miR-520a-3p	hsa-miR-30b-5p/hsa-miR-30c-5p/hsa-miR-30d-5p	hsa-miR-424-5p	hsa-miR-429	hsa-miR-448	hsa-miR-455-5p
DPYSL2	0.0355203	0.567546	0.498701	7	hsa-miR-140-5p	hsa-miR-29a-3p/hsa-miR-29b-3p	hsa-miR-30b-5p/hsa-miR-30c-5p/hsa-miR-30d-5p	hsa-miR-362-3p	hsa-miR-425-5p	hsa-miR-494-3p	hsa-miR-7-5p
EIF2S2	0.0355203	0.567546	0.498701	7	hsa-let-7b-5p/hsa-let-7e-5p/hsa-let-7f-5p	hsa-miR-128-3p/hsa-miR-128-3p/hsa-miR-216a-3p	hsa-miR-186-5p/hsa-miR-186-5p	hsa-miR-27b-3p	hsa-miR-29a-3p/hsa-miR-29b-3p	hsa-miR-362-5p	hsa-miR-374a-5p
GAS7	0.0355203	0.567546	0.498701	7	hsa-let-7b-5p/hsa-let-7e-5p/hsa-let-7f-5p	hsa-miR-135a-5p	hsa-miR-138-5p	hsa-miR-142-5p	hsa-miR-29a-3p/hsa-miR-29b-3p	hsa-miR-362-3p	hsa-miR-374a-5p
HIP1	0.0355203	0.567546	0.498701	7	hsa-let-7b-5p/hsa-let-7e-5p/hsa-let-7f-5p	hsa-miR-128-3p/hsa-miR-128-3p/hsa-miR-216a-3p	hsa-miR-27b-3p	hsa-miR-29a-3p/hsa-miR-29b-3p	hsa-miR-302b-3p/hsa-miR-520a-3p	hsa-miR-381-3p	hsa-miR-7-5p
PHOX2B	0.0355203	0.567546	0.498701	7	hsa-miR-125a-5p/hsa-miR-125b-5p	hsa-miR-138-5p	hsa-miR-146a-5p	hsa-miR-204-5p	hsa-miR-494-3p	hsa-miR-501-3p	hsa-miR-7-5p
SCUBE3	0.0355203	0.567546	0.498701	7	hsa-let-7b-5p/hsa-let-7e-5p/hsa-let-7f-5p	hsa-miR-125a-5p/hsa-miR-125b-5p	hsa-miR-135a-5p	hsa-miR-296-3p	hsa-miR-424-5p	hsa-miR-92a-3p/hsa-miR-92b-3p	hsa-miR-9-5p
SNX12	0.0355203	0.567546	0.498701	7	hsa-miR-128-3p/hsa-miR-128-3p/hsa-miR-216a-3p	hsa-miR-135a-5p	hsa-miR-140-5p	hsa-miR-27b-3p	hsa-miR-302b-3p/hsa-miR-520a-3p	hsa-miR-34a-5p/hsa-miR-34c-5p/hsa-miR-449a/hsa-miR-449b-5p	hsa-miR-425-5p
STXBP5	0.0355203	0.567546	0.498701	7	hsa-let-7b-5p/hsa-let-7e-5p/hsa-let-7f-5p	hsa-miR-138-5p	hsa-miR-141-3p/hsa-miR-200a-3p	hsa-miR-26a-5p	hsa-miR-30b-5p/hsa-miR-30c-5p/hsa-miR-30d-5p	hsa-miR-374a-5p	hsa-miR-424-5p
ZNF275	0.0355203	0.567546	0.498701	7	hsa-let-7b-5p/hsa-let-7e-5p/hsa-let-7f-5p	hsa-miR-135a-5p	hsa-miR-138-5p	hsa-miR-142-5p	hsa-miR-26a-5p	hsa-miR-34a-5p/hsa-miR-34c-5p/hsa-miR-449a/hsa-miR-449b-5p	hsa-miR-424-5p
DLGAP2	0.0366668	0.567546	0.618182	12	hsa-miR-135a-5p	hsa-miR-146a-5p	hsa-miR-29a-3p/hsa-miR-29b-3p	hsa-miR-302b-3p/hsa-miR-520a-3p	hsa-miR-30b-5p/hsa-miR-30c-5p/hsa-miR-30d-5p	hsa-miR-381-3p	hsa-miR-424-5p	hsa-miR-429	hsa-miR-501-3p	hsa-miR-7-5p	hsa-miR-92a-3p/hsa-miR-92b-3p	hsa-miR-9-5p
SBNO1	0.0366668	0.567546	0.618182	12	hsa-let-7b-5p/hsa-let-7e-5p/hsa-let-7f-5p	hsa-miR-125a-5p/hsa-miR-125b-5p	hsa-miR-128-3p/hsa-miR-128-3p/hsa-miR-216a-3p	hsa-miR-140-5p	hsa-miR-186-5p/hsa-miR-186-5p	hsa-miR-26a-5p	hsa-miR-302b-3p/hsa-miR-520a-3p	hsa-miR-381-3p	hsa-miR-424-5p	hsa-miR-501-3p	hsa-miR-92a-3p/hsa-miR-92b-3p	hsa-miR-9-5p
ICK	0.0368182	0.567546	0.557576	9	hsa-let-7b-5p/hsa-let-7e-5p/hsa-let-7f-5p	hsa-miR-142-5p	hsa-miR-186-5p/hsa-miR-186-5p	hsa-miR-30b-5p/hsa-miR-30c-5p/hsa-miR-30d-5p	hsa-miR-374a-5p	hsa-miR-381-3p	hsa-miR-429	hsa-miR-448	hsa-miR-92a-3p/hsa-miR-92b-3p
MBTD1	0.0368182	0.567546	0.557576	9	hsa-let-7b-5p/hsa-let-7e-5p/hsa-let-7f-5p	hsa-miR-128-3p/hsa-miR-128-3p/hsa-miR-216a-3p	hsa-miR-138-5p	hsa-miR-141-3p/hsa-miR-200a-3p	hsa-miR-142-5p	hsa-miR-155-5p	hsa-miR-27b-3p	hsa-miR-29a-3p/hsa-miR-29b-3p	hsa-miR-448
RASA2	0.0368182	0.567546	0.557576	9	hsa-miR-125a-5p/hsa-miR-125b-5p	hsa-miR-128-3p/hsa-miR-128-3p/hsa-miR-216a-3p	hsa-miR-141-3p/hsa-miR-200a-3p	hsa-miR-21-5p	hsa-miR-27b-3p	hsa-miR-30b-5p/hsa-miR-30c-5p/hsa-miR-30d-5p	hsa-miR-374a-5p	hsa-miR-429	hsa-miR-9-5p
RPS6KA5	0.0368182	0.567546	0.557576	9	hsa-miR-128-3p/hsa-miR-128-3p/hsa-miR-216a-3p	hsa-miR-135a-5p	hsa-miR-142-5p	hsa-miR-155-5p	hsa-miR-204-5p	hsa-miR-27b-3p	hsa-miR-302b-3p/hsa-miR-520a-3p	hsa-miR-30b-5p/hsa-miR-30c-5p/hsa-miR-30d-5p	hsa-miR-448
TMEM110	0.0368182	0.567546	0.557576	9	hsa-let-7b-5p/hsa-let-7e-5p/hsa-let-7f-5p	hsa-miR-125a-5p/hsa-miR-125b-5p	hsa-miR-128-3p/hsa-miR-128-3p/hsa-miR-216a-3p	hsa-miR-141-3p/hsa-miR-200a-3p	hsa-miR-27b-3p	hsa-miR-30b-5p/hsa-miR-30c-5p/hsa-miR-30d-5p	hsa-miR-448	hsa-miR-7-5p	hsa-miR-9-5p
ONECUT2	0.0376866	0.567546	0.711962	19	hsa-let-7b-5p/hsa-let-7e-5p/hsa-let-7f-5p	hsa-miR-125a-5p/hsa-miR-125b-5p	hsa-miR-128-3p/hsa-miR-128-3p/hsa-miR-216a-3p	hsa-miR-138-5p	hsa-miR-142-5p	hsa-miR-186-5p/hsa-miR-186-5p	hsa-miR-27b-3p	hsa-miR-296-3p	hsa-miR-296-5p	hsa-miR-29a-3p/hsa-miR-29b-3p	hsa-miR-30b-5p/hsa-miR-30c-5p/hsa-miR-30d-5p	hsa-miR-34a-5p/hsa-miR-34c-5p/hsa-miR-449a/hsa-miR-449b-5p	hsa-miR-362-3p	hsa-miR-374a-5p	hsa-miR-424-5p	hsa-miR-429	hsa-miR-501-3p	hsa-miR-7-5p	hsa-miR-9-5p
GABRB1	0.0382651	0.567546	0.637762	13	hsa-let-7b-5p/hsa-let-7e-5p/hsa-let-7f-5p	hsa-miR-128-3p/hsa-miR-128-3p/hsa-miR-216a-3p	hsa-miR-135a-5p	hsa-miR-138-5p	hsa-miR-151a-3p	hsa-miR-216b-5p	hsa-miR-27b-3p	hsa-miR-296-5p	hsa-miR-29a-3p/hsa-miR-29b-3p	hsa-miR-30b-5p/hsa-miR-30c-5p/hsa-miR-30d-5p	hsa-miR-34a-5p/hsa-miR-34c-5p/hsa-miR-449a/hsa-miR-449b-5p	hsa-miR-381-3p	hsa-miR-9-5p
GRIN2A	0.0382651	0.567546	0.637762	13	hsa-miR-125a-5p/hsa-miR-125b-5p	hsa-miR-155-5p	hsa-miR-216a-5p	hsa-miR-216b-5p	hsa-miR-26a-5p	hsa-miR-27b-3p	hsa-miR-302b-3p/hsa-miR-520a-3p	hsa-miR-30b-5p/hsa-miR-30c-5p/hsa-miR-30d-5p	hsa-miR-381-3p	hsa-miR-425-5p	hsa-miR-429	hsa-miR-494-3p	hsa-miR-7-5p
SETD7	0.0382651	0.567546	0.637762	13	hsa-miR-128-3p/hsa-miR-128-3p/hsa-miR-216a-3p	hsa-miR-135a-5p	hsa-miR-155-5p	hsa-miR-27b-3p	hsa-miR-296-5p	hsa-miR-302b-3p/hsa-miR-520a-3p	hsa-miR-30b-5p/hsa-miR-30c-5p/hsa-miR-30d-5p	hsa-miR-374a-5p	hsa-miR-384	hsa-miR-429	hsa-miR-494-3p	hsa-miR-501-3p	hsa-miR-92a-3p/hsa-miR-92b-3p
CDK6	0.039244	0.567546	0.654545	14	hsa-let-7b-5p/hsa-let-7e-5p/hsa-let-7f-5p	hsa-miR-138-5p	hsa-miR-141-3p/hsa-miR-200a-3p	hsa-miR-142-5p	hsa-miR-186-5p/hsa-miR-186-5p	hsa-miR-21-5p	hsa-miR-26a-5p	hsa-miR-27b-3p	hsa-miR-29a-3p/hsa-miR-29b-3p	hsa-miR-34a-5p/hsa-miR-34c-5p/hsa-miR-449a/hsa-miR-449b-5p	hsa-miR-384	hsa-miR-424-5p	hsa-miR-494-3p	hsa-miR-501-3p
NAA50	0.039244	0.567546	0.654545	14	hsa-miR-128-3p/hsa-miR-128-3p/hsa-miR-216a-3p	hsa-miR-141-3p/hsa-miR-200a-3p	hsa-miR-142-5p	hsa-miR-155-5p	hsa-miR-21-5p	hsa-miR-216a-5p	hsa-miR-216b-5p	hsa-miR-27b-3p	hsa-miR-34a-5p/hsa-miR-34c-5p/hsa-miR-449a/hsa-miR-449b-5p	hsa-miR-362-3p	hsa-miR-371a-5p	hsa-miR-384	hsa-miR-448	hsa-miR-92a-3p/hsa-miR-92b-3p
ADD2	0.0395632	0.567546	0.472727	6	hsa-miR-125a-5p/hsa-miR-125b-5p	hsa-miR-128-3p/hsa-miR-128-3p/hsa-miR-216a-3p	hsa-miR-34a-5p/hsa-miR-34c-5p/hsa-miR-449a/hsa-miR-449b-5p	hsa-miR-422a	hsa-miR-7-5p	hsa-miR-9-5p
ADRB1	0.0395632	0.567546	0.472727	6	hsa-let-7b-5p/hsa-let-7e-5p/hsa-let-7f-5p	hsa-miR-141-3p/hsa-miR-200a-3p	hsa-miR-302b-3p/hsa-miR-520a-3p	hsa-miR-30b-5p/hsa-miR-30c-5p/hsa-miR-30d-5p	hsa-miR-374a-5p	hsa-miR-92a-3p/hsa-miR-92b-3p
BCL9	0.0395632	0.567546	0.472727	6	hsa-miR-140-5p	hsa-miR-204-5p	hsa-miR-216a-5p	hsa-miR-30b-5p/hsa-miR-30c-5p/hsa-miR-30d-5p	hsa-miR-429	hsa-miR-92a-3p/hsa-miR-92b-3p
CAMSAP1	0.0395632	0.567546	0.472727	6	hsa-miR-141-3p/hsa-miR-200a-3p	hsa-miR-146a-5p	hsa-miR-26a-5p	hsa-miR-302b-3p/hsa-miR-520a-3p	hsa-miR-34a-5p/hsa-miR-34c-5p/hsa-miR-449a/hsa-miR-449b-5p	hsa-miR-424-5p
DIO2	0.0395632	0.567546	0.472727	6	hsa-miR-142-5p	hsa-miR-216a-5p	hsa-miR-29a-3p/hsa-miR-29b-3p	hsa-miR-30b-5p/hsa-miR-30c-5p/hsa-miR-30d-5p	hsa-miR-381-3p	hsa-miR-9-5p
FERMT2	0.0395632	0.567546	0.472727	6	hsa-miR-135a-5p	hsa-miR-138-5p	hsa-miR-29a-3p/hsa-miR-29b-3p	hsa-miR-424-5p	hsa-miR-429	hsa-miR-448
GMPS	0.0395632	0.567546	0.472727	6	hsa-miR-100-5p	hsa-miR-128-3p/hsa-miR-128-3p/hsa-miR-216a-3p	hsa-miR-141-3p/hsa-miR-200a-3p	hsa-miR-146a-5p	hsa-miR-204-5p	hsa-miR-27b-3p
KCNA6	0.0395632	0.567546	0.472727	6	hsa-let-7b-5p/hsa-let-7e-5p/hsa-let-7f-5p	hsa-miR-128-3p/hsa-miR-128-3p/hsa-miR-216a-3p	hsa-miR-27b-3p	hsa-miR-296-5p	hsa-miR-448	hsa-miR-7-5p
KRR1	0.0395632	0.567546	0.472727	6	hsa-miR-142-5p	hsa-miR-186-5p/hsa-miR-186-5p	hsa-miR-27b-3p	hsa-miR-371a-5p	hsa-miR-374a-5p	hsa-miR-429
MAN1A2	0.0395632	0.567546	0.472727	6	hsa-miR-186-5p/hsa-miR-186-5p	hsa-miR-204-5p	hsa-miR-26a-5p	hsa-miR-30b-5p/hsa-miR-30c-5p/hsa-miR-30d-5p	hsa-miR-381-3p	hsa-miR-9-5p
MARCH8	0.0395632	0.567546	0.472727	6	hsa-miR-128-3p/hsa-miR-128-3p/hsa-miR-216a-3p	hsa-miR-302b-3p/hsa-miR-520a-3p	hsa-miR-30b-5p/hsa-miR-30c-5p/hsa-miR-30d-5p	hsa-miR-34a-5p/hsa-miR-34c-5p/hsa-miR-449a/hsa-miR-449b-5p	hsa-miR-429	hsa-miR-92a-3p/hsa-miR-92b-3p
MCC	0.0395632	0.567546	0.472727	6	hsa-miR-204-5p	hsa-miR-216a-5p	hsa-miR-26a-5p	hsa-miR-381-3p	hsa-miR-429	hsa-miR-494-3p
MTMR4	0.0395632	0.567546	0.472727	6	hsa-miR-128-3p/hsa-miR-128-3p/hsa-miR-216a-3p	hsa-miR-205-5p	hsa-miR-27b-3p	hsa-miR-29a-3p/hsa-miR-29b-3p	hsa-miR-302b-3p/hsa-miR-520a-3p	hsa-miR-424-5p
NAPEPLD	0.0395632	0.567546	0.472727	6	hsa-let-7b-5p/hsa-let-7e-5p/hsa-let-7f-5p	hsa-miR-128-3p/hsa-miR-128-3p/hsa-miR-216a-3p	hsa-miR-151a-3p	hsa-miR-302b-3p/hsa-miR-520a-3p	hsa-miR-34a-5p/hsa-miR-34c-5p/hsa-miR-449a/hsa-miR-449b-5p	hsa-miR-424-5p
NEK6	0.0395632	0.567546	0.472727	6	hsa-miR-128-3p/hsa-miR-128-3p/hsa-miR-216a-3p	hsa-miR-141-3p/hsa-miR-200a-3p	hsa-miR-204-5p	hsa-miR-205-5p	hsa-miR-26a-5p	hsa-miR-27b-3p
PELI2	0.0395632	0.567546	0.472727	6	hsa-miR-125a-5p/hsa-miR-125b-5p	hsa-miR-128-3p/hsa-miR-128-3p/hsa-miR-216a-3p	hsa-miR-135a-5p	hsa-miR-26a-5p	hsa-miR-27b-3p	hsa-miR-424-5p
RBFOX1	0.0395632	0.567546	0.472727	6	hsa-let-7b-5p/hsa-let-7e-5p/hsa-let-7f-5p	hsa-miR-186-5p/hsa-miR-186-5p	hsa-miR-30b-5p/hsa-miR-30c-5p/hsa-miR-30d-5p	hsa-miR-429	hsa-miR-7-5p	hsa-miR-92a-3p/hsa-miR-92b-3p
SHROOM3	0.0395632	0.567546	0.472727	6	hsa-miR-140-5p	hsa-miR-205-5p	hsa-miR-371a-5p	hsa-miR-424-5p	hsa-miR-494-3p	hsa-miR-9-5p
SKOR1	0.0395632	0.567546	0.472727	6	hsa-miR-128-3p/hsa-miR-128-3p/hsa-miR-216a-3p	hsa-miR-135a-5p	hsa-miR-27b-3p	hsa-miR-302b-3p/hsa-miR-520a-3p	hsa-miR-424-5p	hsa-miR-92a-3p/hsa-miR-92b-3p
SRSF9	0.0395632	0.567546	0.472727	6	hsa-miR-128-3p/hsa-miR-128-3p/hsa-miR-216a-3p	hsa-miR-186-5p/hsa-miR-186-5p	hsa-miR-27b-3p	hsa-miR-371a-5p	hsa-miR-381-3p	hsa-miR-384
STAG1	0.0395632	0.567546	0.472727	6	hsa-miR-128-3p/hsa-miR-128-3p/hsa-miR-216a-3p	hsa-miR-138-5p	hsa-miR-141-3p/hsa-miR-200a-3p	hsa-miR-142-5p	hsa-miR-27b-3p	hsa-miR-424-5p
STK39	0.0395632	0.567546	0.472727	6	hsa-miR-128-3p/hsa-miR-128-3p/hsa-miR-216a-3p	hsa-miR-26a-5p	hsa-miR-27b-3p	hsa-miR-30b-5p/hsa-miR-30c-5p/hsa-miR-30d-5p	hsa-miR-425-5p	hsa-miR-92a-3p/hsa-miR-92b-3p
TAF4B	0.0395632	0.567546	0.472727	6	hsa-miR-30b-5p/hsa-miR-30c-5p/hsa-miR-30d-5p	hsa-miR-34a-5p/hsa-miR-34c-5p/hsa-miR-449a/hsa-miR-449b-5p	hsa-miR-374a-5p	hsa-miR-381-3p	hsa-miR-494-3p	hsa-miR-9-5p
USP42	0.0395632	0.567546	0.472727	6	hsa-miR-128-3p/hsa-miR-128-3p/hsa-miR-216a-3p	hsa-miR-135a-5p	hsa-miR-27b-3p	hsa-miR-29a-3p/hsa-miR-29b-3p	hsa-miR-302b-3p/hsa-miR-520a-3p	hsa-miR-424-5p
ZCCHC3	0.0395632	0.567546	0.472727	6	hsa-let-7b-5p/hsa-let-7e-5p/hsa-let-7f-5p	hsa-miR-135a-5p	hsa-miR-141-3p/hsa-miR-200a-3p	hsa-miR-21-5p	hsa-miR-296-5p	hsa-miR-424-5p
ZDHHC23	0.0395632	0.567546	0.472727	6	hsa-miR-135a-5p	hsa-miR-186-5p/hsa-miR-186-5p	hsa-miR-34a-5p/hsa-miR-34c-5p/hsa-miR-449a/hsa-miR-449b-5p	hsa-miR-381-3p	hsa-miR-448	hsa-miR-92a-3p/hsa-miR-92b-3p
CPEB3	0.0396977	0.567546	0.669091	15	hsa-let-7b-5p/hsa-let-7e-5p/hsa-let-7f-5p	hsa-miR-125a-5p/hsa-miR-125b-5p	hsa-miR-128-3p/hsa-miR-128-3p/hsa-miR-216a-3p	hsa-miR-142-5p	hsa-miR-186-5p/hsa-miR-186-5p	hsa-miR-21-5p	hsa-miR-26a-5p	hsa-miR-27b-3p	hsa-miR-29a-3p/hsa-miR-29b-3p	hsa-miR-302b-3p/hsa-miR-520a-3p	hsa-miR-30b-5p/hsa-miR-30c-5p/hsa-miR-30d-5p	hsa-miR-424-5p	hsa-miR-455-5p	hsa-miR-92a-3p/hsa-miR-92b-3p	hsa-miR-9-5p
FAM126B	0.0396977	0.567546	0.669091	15	hsa-miR-125a-5p/hsa-miR-125b-5p	hsa-miR-128-3p/hsa-miR-128-3p/hsa-miR-216a-3p	hsa-miR-135a-5p	hsa-miR-141-3p/hsa-miR-200a-3p	hsa-miR-186-5p/hsa-miR-186-5p	hsa-miR-21-5p	hsa-miR-216b-5p	hsa-miR-27b-3p	hsa-miR-29a-3p/hsa-miR-29b-3p	hsa-miR-30b-5p/hsa-miR-30c-5p/hsa-miR-30d-5p	hsa-miR-34a-5p/hsa-miR-34c-5p/hsa-miR-449a/hsa-miR-449b-5p	hsa-miR-501-3p	hsa-miR-7-5p	hsa-miR-92a-3p/hsa-miR-92b-3p	hsa-miR-9-5p
ZFHX4	0.0396977	0.567546	0.669091	15	hsa-miR-128-3p/hsa-miR-128-3p/hsa-miR-216a-3p	hsa-miR-142-5p	hsa-miR-204-5p	hsa-miR-26a-5p	hsa-miR-27b-3p	hsa-miR-302b-3p/hsa-miR-520a-3p	hsa-miR-34a-5p/hsa-miR-34c-5p/hsa-miR-449a/hsa-miR-449b-5p	hsa-miR-362-3p	hsa-miR-424-5p	hsa-miR-425-5p	hsa-miR-429	hsa-miR-494-3p	hsa-miR-501-3p	hsa-miR-92a-3p/hsa-miR-92b-3p	hsa-miR-9-5p
CEP41	0.0410748	0.567546	0.589091	10	hsa-miR-151a-3p	hsa-miR-155-5p	hsa-miR-186-5p/hsa-miR-186-5p	hsa-miR-26a-5p	hsa-miR-29a-3p/hsa-miR-29b-3p	hsa-miR-30b-5p/hsa-miR-30c-5p/hsa-miR-30d-5p	hsa-miR-381-3p	hsa-miR-429	hsa-miR-494-3p	hsa-miR-92a-3p/hsa-miR-92b-3p
CHD1	0.0410748	0.567546	0.589091	10	hsa-miR-135a-5p	hsa-miR-216b-5p	hsa-miR-26a-5p	hsa-miR-302b-3p/hsa-miR-520a-3p	hsa-miR-30b-5p/hsa-miR-30c-5p/hsa-miR-30d-5p	hsa-miR-34a-5p/hsa-miR-34c-5p/hsa-miR-449a/hsa-miR-449b-5p	hsa-miR-362-5p	hsa-miR-381-3p	hsa-miR-429	hsa-miR-494-3p
FBXL20	0.0410748	0.567546	0.589091	10	hsa-miR-128-3p/hsa-miR-128-3p/hsa-miR-216a-3p	hsa-miR-141-3p/hsa-miR-200a-3p	hsa-miR-26a-5p	hsa-miR-27b-3p	hsa-miR-29a-3p/hsa-miR-29b-3p	hsa-miR-30b-5p/hsa-miR-30c-5p/hsa-miR-30d-5p	hsa-miR-371a-5p	hsa-miR-422a	hsa-miR-424-5p	hsa-miR-9-5p
PRPF40A	0.0410748	0.567546	0.589091	10	hsa-miR-135a-5p	hsa-miR-138-5p	hsa-miR-142-5p	hsa-miR-186-5p/hsa-miR-186-5p	hsa-miR-216a-5p	hsa-miR-29a-3p/hsa-miR-29b-3p	hsa-miR-30b-5p/hsa-miR-30c-5p/hsa-miR-30d-5p	hsa-miR-374a-5p	hsa-miR-494-3p	hsa-miR-92a-3p/hsa-miR-92b-3p
ROBO1	0.0410748	0.567546	0.589091	10	hsa-let-7b-5p/hsa-let-7e-5p/hsa-let-7f-5p	hsa-miR-128-3p/hsa-miR-128-3p/hsa-miR-216a-3p	hsa-miR-135a-5p	hsa-miR-138-5p	hsa-miR-142-5p	hsa-miR-146a-5p	hsa-miR-204-5p	hsa-miR-27b-3p	hsa-miR-29a-3p/hsa-miR-29b-3p	hsa-miR-92a-3p/hsa-miR-92b-3p
SLC25A16	0.0410748	0.567546	0.589091	10	hsa-miR-128-3p/hsa-miR-128-3p/hsa-miR-216a-3p	hsa-miR-142-5p	hsa-miR-26a-5p	hsa-miR-27b-3p	hsa-miR-374a-5p	hsa-miR-381-3p	hsa-miR-425-5p	hsa-miR-494-3p	hsa-miR-7-5p	hsa-miR-92a-3p/hsa-miR-92b-3p
AHNAK	0.0421686	0.567546	0.381818	4	hsa-miR-302b-3p/hsa-miR-520a-3p	hsa-miR-30b-5p/hsa-miR-30c-5p/hsa-miR-30d-5p	hsa-miR-362-3p	hsa-miR-429
ARL10	0.0421686	0.567546	0.381818	4	hsa-miR-138-5p	hsa-miR-30b-5p/hsa-miR-30c-5p/hsa-miR-30d-5p	hsa-miR-422a	hsa-miR-424-5p
BAP1	0.0421686	0.567546	0.381818	4	hsa-miR-125a-5p/hsa-miR-125b-5p	hsa-miR-141-3p/hsa-miR-200a-3p	hsa-miR-423-5p	hsa-miR-429
CACNA1A	0.0421686	0.567546	0.381818	4	hsa-miR-128-3p/hsa-miR-128-3p/hsa-miR-216a-3p	hsa-miR-138-5p	hsa-miR-27b-3p	hsa-miR-29a-3p/hsa-miR-29b-3p
CCNL2	0.0421686	0.567546	0.381818	4	hsa-miR-138-5p	hsa-miR-141-3p/hsa-miR-200a-3p	hsa-miR-26a-5p	hsa-miR-29a-3p/hsa-miR-29b-3p
COLGALT2	0.0421686	0.567546	0.381818	4	hsa-miR-128-3p/hsa-miR-128-3p/hsa-miR-216a-3p	hsa-miR-27b-3p	hsa-miR-424-5p	hsa-miR-9-5p
CRMP1	0.0421686	0.567546	0.381818	4	hsa-miR-141-3p/hsa-miR-200a-3p	hsa-miR-205-5p	hsa-miR-30b-5p/hsa-miR-30c-5p/hsa-miR-30d-5p	hsa-miR-362-3p
CSNK1G2	0.0421686	0.567546	0.381818	4	hsa-miR-135a-5p	hsa-miR-155-5p	hsa-miR-422a	hsa-miR-9-5p
DAPK1	0.0421686	0.567546	0.381818	4	hsa-let-7b-5p/hsa-let-7e-5p/hsa-let-7f-5p	hsa-miR-141-3p/hsa-miR-200a-3p	hsa-miR-26a-5p	hsa-miR-362-3p
EHD1	0.0421686	0.567546	0.381818	4	hsa-miR-155-5p	hsa-miR-21-5p	hsa-miR-26a-5p	hsa-miR-7-5p
FAM118B	0.0421686	0.567546	0.381818	4	hsa-miR-141-3p/hsa-miR-200a-3p	hsa-miR-205-5p	hsa-miR-26a-5p	hsa-miR-429
FAM172A	0.0421686	0.567546	0.381818	4	hsa-miR-128-3p/hsa-miR-128-3p/hsa-miR-216a-3p	hsa-miR-26a-5p	hsa-miR-27b-3p	hsa-miR-423-5p
FOSL1	0.0421686	0.567546	0.381818	4	hsa-miR-216b-5p	hsa-miR-29a-3p/hsa-miR-29b-3p	hsa-miR-34a-5p/hsa-miR-34c-5p/hsa-miR-449a/hsa-miR-449b-5p	hsa-miR-424-5p
GAD1	0.0421686	0.567546	0.381818	4	hsa-miR-128-3p/hsa-miR-128-3p/hsa-miR-216a-3p	hsa-miR-216b-5p	hsa-miR-381-3p	hsa-miR-9-5p
GRAMD2	0.0421686	0.567546	0.381818	4	hsa-miR-128-3p/hsa-miR-128-3p/hsa-miR-216a-3p	hsa-miR-205-5p	hsa-miR-30b-5p/hsa-miR-30c-5p/hsa-miR-30d-5p	hsa-miR-424-5p
IDS	0.0421686	0.567546	0.381818	4	hsa-miR-141-3p/hsa-miR-200a-3p	hsa-miR-186-5p/hsa-miR-186-5p	hsa-miR-429	hsa-miR-7-5p
IGSF1	0.0421686	0.567546	0.381818	4	hsa-let-7b-5p/hsa-let-7e-5p/hsa-let-7f-5p	hsa-miR-146a-5p	hsa-miR-29a-3p/hsa-miR-29b-3p	hsa-miR-34a-5p/hsa-miR-34c-5p/hsa-miR-449a/hsa-miR-449b-5p
IKBKAP	0.0421686	0.567546	0.381818	4	hsa-let-7b-5p/hsa-let-7e-5p/hsa-let-7f-5p	hsa-miR-371a-5p	hsa-miR-424-5p	hsa-miR-494-3p
IKZF5	0.0421686	0.567546	0.381818	4	hsa-miR-128-3p/hsa-miR-128-3p/hsa-miR-216a-3p	hsa-miR-216b-5p	hsa-miR-27b-3p	hsa-miR-9-5p
ITPKC	0.0421686	0.567546	0.381818	4	hsa-miR-128-3p/hsa-miR-128-3p/hsa-miR-216a-3p	hsa-miR-27b-3p	hsa-miR-7-5p	hsa-miR-9-5p
LPPR1	0.0421686	0.567546	0.381818	4	hsa-miR-128-3p/hsa-miR-128-3p/hsa-miR-216a-3p	hsa-miR-142-5p	hsa-miR-27b-3p	hsa-miR-429
MGLL	0.0421686	0.567546	0.381818	4	hsa-let-7b-5p/hsa-let-7e-5p/hsa-let-7f-5p	hsa-miR-142-5p	hsa-miR-423-5p	hsa-miR-92a-3p/hsa-miR-92b-3p
MYLK4	0.0421686	0.567546	0.381818	4	hsa-miR-151a-3p	hsa-miR-155-5p	hsa-miR-205-5p	hsa-miR-424-5p
NCOA4	0.0421686	0.567546	0.381818	4	hsa-miR-186-5p/hsa-miR-186-5p	hsa-miR-26a-5p	hsa-miR-29a-3p/hsa-miR-29b-3p	hsa-miR-501-3p
NIPAL4	0.0421686	0.567546	0.381818	4	hsa-let-7b-5p/hsa-let-7e-5p/hsa-let-7f-5p	hsa-miR-125a-5p/hsa-miR-125b-5p	hsa-miR-128-3p/hsa-miR-128-3p/hsa-miR-216a-3p	hsa-miR-27b-3p
NKX3-1	0.0421686	0.567546	0.381818	4	hsa-miR-142-5p	hsa-miR-155-5p	hsa-miR-26a-5p	hsa-miR-302b-3p/hsa-miR-520a-3p
NUP210	0.0421686	0.567546	0.381818	4	hsa-miR-125a-5p/hsa-miR-125b-5p	hsa-miR-128-3p/hsa-miR-128-3p/hsa-miR-216a-3p	hsa-miR-26a-5p	hsa-miR-424-5p
OSR1	0.0421686	0.567546	0.381818	4	hsa-miR-142-5p	hsa-miR-21-5p	hsa-miR-429	hsa-miR-451a
PARG	0.0421686	0.567546	0.381818	4	hsa-miR-186-5p/hsa-miR-186-5p	hsa-miR-29a-3p/hsa-miR-29b-3p	hsa-miR-302b-3p/hsa-miR-520a-3p	hsa-miR-9-5p
PSMA4	0.0421686	0.567546	0.381818	4	hsa-miR-146a-5p	hsa-miR-205-5p	hsa-miR-362-5p	hsa-miR-371a-5p
PTCHD3	0.0421686	0.567546	0.381818	4	hsa-miR-141-3p/hsa-miR-200a-3p	hsa-miR-381-3p	hsa-miR-429	hsa-miR-494-3p
RAP1GDS1	0.0421686	0.567546	0.381818	4	hsa-miR-135a-5p	hsa-miR-29a-3p/hsa-miR-29b-3p	hsa-miR-34a-5p/hsa-miR-34c-5p/hsa-miR-449a/hsa-miR-449b-5p	hsa-miR-381-3p
RNF146	0.0421686	0.567546	0.381818	4	hsa-miR-128-3p/hsa-miR-128-3p/hsa-miR-216a-3p	hsa-miR-205-5p	hsa-miR-27b-3p	hsa-miR-9-5p
RSPRY1	0.0421686	0.567546	0.381818	4	hsa-miR-26a-5p	hsa-miR-429	hsa-miR-7-5p	hsa-miR-9-5p
SIAH2	0.0421686	0.567546	0.381818	4	hsa-miR-146a-5p	hsa-miR-30b-5p/hsa-miR-30c-5p/hsa-miR-30d-5p	hsa-miR-371a-5p	hsa-miR-425-5p
SLA2	0.0421686	0.567546	0.381818	4	hsa-miR-204-5p	hsa-miR-26a-5p	hsa-miR-494-3p	hsa-miR-501-3p
SLC25A24	0.0421686	0.567546	0.381818	4	hsa-let-7b-5p/hsa-let-7e-5p/hsa-let-7f-5p	hsa-miR-204-5p	hsa-miR-381-3p	hsa-miR-9-5p
SLC39A11	0.0421686	0.567546	0.381818	4	hsa-miR-128-3p/hsa-miR-128-3p/hsa-miR-216a-3p	hsa-miR-204-5p	hsa-miR-27b-3p	hsa-miR-30b-5p/hsa-miR-30c-5p/hsa-miR-30d-5p
SOCS1	0.0421686	0.567546	0.381818	4	hsa-let-7b-5p/hsa-let-7e-5p/hsa-let-7f-5p	hsa-miR-142-5p	hsa-miR-155-5p	hsa-miR-30b-5p/hsa-miR-30c-5p/hsa-miR-30d-5p
SPG20	0.0421686	0.567546	0.381818	4	hsa-miR-21-5p	hsa-miR-384	hsa-miR-429	hsa-miR-9-5p
SPRYD3	0.0421686	0.567546	0.381818	4	hsa-miR-141-3p/hsa-miR-200a-3p	hsa-miR-186-5p/hsa-miR-186-5p	hsa-miR-302b-3p/hsa-miR-520a-3p	hsa-miR-424-5p
SPRYD4	0.0421686	0.567546	0.381818	4	hsa-let-7b-5p/hsa-let-7e-5p/hsa-let-7f-5p	hsa-miR-429	hsa-miR-92a-3p/hsa-miR-92b-3p	hsa-miR-9-5p
TBC1D8B	0.0421686	0.567546	0.381818	4	hsa-miR-125a-5p/hsa-miR-125b-5p	hsa-miR-142-5p	hsa-miR-27b-3p	hsa-miR-302b-3p/hsa-miR-520a-3p
TM7SF3	0.0421686	0.567546	0.381818	4	hsa-miR-140-5p	hsa-miR-34a-5p/hsa-miR-34c-5p/hsa-miR-449a/hsa-miR-449b-5p	hsa-miR-381-3p	hsa-miR-424-5p
TMEM251	0.0421686	0.567546	0.381818	4	hsa-let-7b-5p/hsa-let-7e-5p/hsa-let-7f-5p	hsa-miR-186-5p/hsa-miR-186-5p	hsa-miR-296-3p	hsa-miR-34a-5p/hsa-miR-34c-5p/hsa-miR-449a/hsa-miR-449b-5p
ULK1	0.0421686	0.567546	0.381818	4	hsa-miR-128-3p/hsa-miR-128-3p/hsa-miR-216a-3p	hsa-miR-142-5p	hsa-miR-26a-5p	hsa-miR-302b-3p/hsa-miR-520a-3p
VMA21	0.0421686	0.567546	0.381818	4	hsa-miR-155-5p	hsa-miR-381-3p	hsa-miR-424-5p	hsa-miR-7-5p
WASF1	0.0421686	0.567546	0.381818	4	hsa-miR-140-5p	hsa-miR-29a-3p/hsa-miR-29b-3p	hsa-miR-34a-5p/hsa-miR-34c-5p/hsa-miR-449a/hsa-miR-449b-5p	hsa-miR-429
WISP1	0.0421686	0.567546	0.381818	4	hsa-miR-128-3p/hsa-miR-128-3p/hsa-miR-216a-3p	hsa-miR-27b-3p	hsa-miR-29a-3p/hsa-miR-29b-3p	hsa-miR-424-5p
ADCY5	0.0424548	0.567546	0.436364	5	hsa-miR-186-5p/hsa-miR-186-5p	hsa-miR-34a-5p/hsa-miR-34c-5p/hsa-miR-449a/hsa-miR-449b-5p	hsa-miR-424-5p	hsa-miR-494-3p	hsa-miR-9-5p
ATP5G3	0.0424548	0.567546	0.436364	5	hsa-miR-128-3p/hsa-miR-128-3p/hsa-miR-216a-3p	hsa-miR-186-5p/hsa-miR-186-5p	hsa-miR-27b-3p	hsa-miR-29a-3p/hsa-miR-29b-3p	hsa-miR-425-5p
C2orf88	0.0424548	0.567546	0.436364	5	hsa-let-7b-5p/hsa-let-7e-5p/hsa-let-7f-5p	hsa-miR-125a-5p/hsa-miR-125b-5p	hsa-miR-29a-3p/hsa-miR-29b-3p	hsa-miR-302b-3p/hsa-miR-520a-3p	hsa-miR-9-5p
DACT1	0.0424548	0.567546	0.436364	5	hsa-miR-30b-5p/hsa-miR-30c-5p/hsa-miR-30d-5p	hsa-miR-422a	hsa-miR-429	hsa-miR-448	hsa-miR-92a-3p/hsa-miR-92b-3p
DZIP1	0.0424548	0.567546	0.436364	5	hsa-let-7b-5p/hsa-let-7e-5p/hsa-let-7f-5p	hsa-miR-141-3p/hsa-miR-200a-3p	hsa-miR-374a-5p	hsa-miR-424-5p	hsa-miR-429
GPR161	0.0424548	0.567546	0.436364	5	hsa-miR-140-5p	hsa-miR-26a-5p	hsa-miR-302b-3p/hsa-miR-520a-3p	hsa-miR-30b-5p/hsa-miR-30c-5p/hsa-miR-30d-5p	hsa-miR-374a-5p
ITGA2	0.0424548	0.567546	0.436364	5	hsa-miR-128-3p/hsa-miR-128-3p/hsa-miR-216a-3p	hsa-miR-27b-3p	hsa-miR-302b-3p/hsa-miR-520a-3p	hsa-miR-30b-5p/hsa-miR-30c-5p/hsa-miR-30d-5p	hsa-miR-424-5p
LIG3	0.0424548	0.567546	0.436364	5	hsa-miR-142-5p	hsa-miR-26a-5p	hsa-miR-29a-3p/hsa-miR-29b-3p	hsa-miR-374a-5p	hsa-miR-381-3p
LURAP1L	0.0424548	0.567546	0.436364	5	hsa-miR-125a-5p/hsa-miR-125b-5p	hsa-miR-381-3p	hsa-miR-424-5p	hsa-miR-92a-3p/hsa-miR-92b-3p	hsa-miR-9-5p
MARCH5	0.0424548	0.567546	0.436364	5	hsa-miR-128-3p/hsa-miR-128-3p/hsa-miR-216a-3p	hsa-miR-21-5p	hsa-miR-27b-3p	hsa-miR-302b-3p/hsa-miR-520a-3p	hsa-miR-424-5p
MICAL3	0.0424548	0.567546	0.436364	5	hsa-miR-138-5p	hsa-miR-140-5p	hsa-miR-26a-5p	hsa-miR-302b-3p/hsa-miR-520a-3p	hsa-miR-9-5p
MNT	0.0424548	0.567546	0.436364	5	hsa-miR-128-3p/hsa-miR-128-3p/hsa-miR-216a-3p	hsa-miR-216b-5p	hsa-miR-302b-3p/hsa-miR-520a-3p	hsa-miR-30b-5p/hsa-miR-30c-5p/hsa-miR-30d-5p	hsa-miR-424-5p
OTUB2	0.0424548	0.567546	0.436364	5	hsa-let-7b-5p/hsa-let-7e-5p/hsa-let-7f-5p	hsa-miR-125a-5p/hsa-miR-125b-5p	hsa-miR-155-5p	hsa-miR-29a-3p/hsa-miR-29b-3p	hsa-miR-422a
OXR1	0.0424548	0.567546	0.436364	5	hsa-miR-302b-3p/hsa-miR-520a-3p	hsa-miR-30b-5p/hsa-miR-30c-5p/hsa-miR-30d-5p	hsa-miR-429	hsa-miR-448	hsa-miR-7-5p
PER1	0.0424548	0.567546	0.436364	5	hsa-miR-138-5p	hsa-miR-146a-5p	hsa-miR-28-3p	hsa-miR-29a-3p/hsa-miR-29b-3p	hsa-miR-423-5p
PLEKHA1	0.0424548	0.567546	0.436364	5	hsa-miR-21-5p	hsa-miR-29a-3p/hsa-miR-29b-3p	hsa-miR-424-5p	hsa-miR-92a-3p/hsa-miR-92b-3p	hsa-miR-9-5p
RAF1	0.0424548	0.567546	0.436364	5	hsa-miR-125a-5p/hsa-miR-125b-5p	hsa-miR-135a-5p	hsa-miR-424-5p	hsa-miR-455-5p	hsa-miR-7-5p
RALGAPA2	0.0424548	0.567546	0.436364	5	hsa-miR-128-3p/hsa-miR-128-3p/hsa-miR-216a-3p	hsa-miR-27b-3p	hsa-miR-425-5p	hsa-miR-494-3p	hsa-miR-7-5p
RALGDS	0.0424548	0.567546	0.436364	5	hsa-miR-302b-3p/hsa-miR-520a-3p	hsa-miR-30b-5p/hsa-miR-30c-5p/hsa-miR-30d-5p	hsa-miR-34a-5p/hsa-miR-34c-5p/hsa-miR-449a/hsa-miR-449b-5p	hsa-miR-374a-5p	hsa-miR-9-5p
RBAK	0.0424548	0.567546	0.436364	5	hsa-miR-125a-5p/hsa-miR-125b-5p	hsa-miR-135a-5p	hsa-miR-155-5p	hsa-miR-29a-3p/hsa-miR-29b-3p	hsa-miR-448
SFXN1	0.0424548	0.567546	0.436364	5	hsa-miR-141-3p/hsa-miR-200a-3p	hsa-miR-26a-5p	hsa-miR-30b-5p/hsa-miR-30c-5p/hsa-miR-30d-5p	hsa-miR-429	hsa-miR-92a-3p/hsa-miR-92b-3p
SLC16A13	0.0424548	0.567546	0.436364	5	hsa-miR-205-5p	hsa-miR-27b-3p	hsa-miR-296-3p	hsa-miR-296-5p	hsa-miR-371a-5p
SLC38A9	0.0424548	0.567546	0.436364	5	hsa-let-7b-5p/hsa-let-7e-5p/hsa-let-7f-5p	hsa-miR-125a-5p/hsa-miR-125b-5p	hsa-miR-141-3p/hsa-miR-200a-3p	hsa-miR-204-5p	hsa-miR-26a-5p
SYS1	0.0424548	0.567546	0.436364	5	hsa-miR-138-5p	hsa-miR-140-5p	hsa-miR-362-5p	hsa-miR-424-5p	hsa-miR-429
SYVN1	0.0424548	0.567546	0.436364	5	hsa-miR-125a-5p/hsa-miR-125b-5p	hsa-miR-155-5p	hsa-miR-34a-5p/hsa-miR-34c-5p/hsa-miR-449a/hsa-miR-449b-5p	hsa-miR-381-3p	hsa-miR-429
TAF9B	0.0424548	0.567546	0.436364	5	hsa-let-7b-5p/hsa-let-7e-5p/hsa-let-7f-5p	hsa-miR-125a-5p/hsa-miR-125b-5p	hsa-miR-140-5p	hsa-miR-146a-5p	hsa-miR-26a-5p
TAPT1	0.0424548	0.567546	0.436364	5	hsa-miR-141-3p/hsa-miR-200a-3p	hsa-miR-155-5p	hsa-miR-205-5p	hsa-miR-27b-3p	hsa-miR-302b-3p/hsa-miR-520a-3p
TTC14	0.0424548	0.567546	0.436364	5	hsa-miR-135a-5p	hsa-miR-216b-5p	hsa-miR-29a-3p/hsa-miR-29b-3p	hsa-miR-424-5p	hsa-miR-92a-3p/hsa-miR-92b-3p
UACA	0.0424548	0.567546	0.436364	5	hsa-miR-141-3p/hsa-miR-200a-3p	hsa-miR-216a-5p	hsa-miR-29a-3p/hsa-miR-29b-3p	hsa-miR-384	hsa-miR-9-5p
UHRF1BP1	0.0424548	0.567546	0.436364	5	hsa-miR-138-5p	hsa-miR-27b-3p	hsa-miR-30b-5p/hsa-miR-30c-5p/hsa-miR-30d-5p	hsa-miR-429	hsa-miR-9-5p
VHL	0.0424548	0.567546	0.436364	5	hsa-miR-142-5p	hsa-miR-204-5p	hsa-miR-21-5p	hsa-miR-29a-3p/hsa-miR-29b-3p	hsa-miR-362-3p
VWC2L	0.0424548	0.567546	0.436364	5	hsa-miR-128-3p/hsa-miR-128-3p/hsa-miR-216a-3p	hsa-miR-138-5p	hsa-miR-141-3p/hsa-miR-200a-3p	hsa-miR-27b-3p	hsa-miR-424-5p
BACH1	0.043184	0.567546	0.545455	8	hsa-let-7b-5p/hsa-let-7e-5p/hsa-let-7f-5p	hsa-miR-135a-5p	hsa-miR-140-5p	hsa-miR-155-5p	hsa-miR-186-5p/hsa-miR-186-5p	hsa-miR-30b-5p/hsa-miR-30c-5p/hsa-miR-30d-5p	hsa-miR-494-3p	hsa-miR-92a-3p/hsa-miR-92b-3p
DCUN1D4	0.043184	0.567546	0.545455	8	hsa-miR-128-3p/hsa-miR-128-3p/hsa-miR-216a-3p	hsa-miR-135a-5p	hsa-miR-138-5p	hsa-miR-216b-5p	hsa-miR-27b-3p	hsa-miR-29a-3p/hsa-miR-29b-3p	hsa-miR-424-5p	hsa-miR-9-5p
DENND6A	0.043184	0.567546	0.545455	8	hsa-let-7b-5p/hsa-let-7e-5p/hsa-let-7f-5p	hsa-miR-125a-5p/hsa-miR-125b-5p	hsa-miR-138-5p	hsa-miR-29a-3p/hsa-miR-29b-3p	hsa-miR-362-5p	hsa-miR-424-5p	hsa-miR-425-5p	hsa-miR-494-3p
EVX2	0.043184	0.567546	0.545455	8	hsa-miR-141-3p/hsa-miR-200a-3p	hsa-miR-204-5p	hsa-miR-216a-5p	hsa-miR-26a-5p	hsa-miR-30b-5p/hsa-miR-30c-5p/hsa-miR-30d-5p	hsa-miR-34a-5p/hsa-miR-34c-5p/hsa-miR-449a/hsa-miR-449b-5p	hsa-miR-501-3p	hsa-miR-92a-3p/hsa-miR-92b-3p
HECTD1	0.043184	0.567546	0.545455	8	hsa-miR-128-3p/hsa-miR-128-3p/hsa-miR-216a-3p	hsa-miR-141-3p/hsa-miR-200a-3p	hsa-miR-21-5p	hsa-miR-374a-5p	hsa-miR-381-3p	hsa-miR-424-5p	hsa-miR-425-5p	hsa-miR-9-5p
KIF26B	0.043184	0.567546	0.545455	8	hsa-miR-146a-5p	hsa-miR-155-5p	hsa-miR-205-5p	hsa-miR-29a-3p/hsa-miR-29b-3p	hsa-miR-302b-3p/hsa-miR-520a-3p	hsa-miR-422a	hsa-miR-429	hsa-miR-9-5p
SLC10A7	0.043184	0.567546	0.545455	8	hsa-let-7b-5p/hsa-let-7e-5p/hsa-let-7f-5p	hsa-miR-128-3p/hsa-miR-128-3p/hsa-miR-216a-3p	hsa-miR-138-5p	hsa-miR-21-5p	hsa-miR-27b-3p	hsa-miR-29a-3p/hsa-miR-29b-3p	hsa-miR-374a-5p	hsa-miR-424-5p
ZBTB38	0.043184	0.567546	0.545455	8	hsa-miR-125a-5p/hsa-miR-125b-5p	hsa-miR-155-5p	hsa-miR-205-5p	hsa-miR-26a-5p	hsa-miR-381-3p	hsa-miR-429	hsa-miR-7-5p	hsa-miR-9-5p
ARMC8	0.0441796	0.567546	0.614876	11	hsa-let-7b-5p/hsa-let-7e-5p/hsa-let-7f-5p	hsa-miR-128-3p/hsa-miR-128-3p/hsa-miR-216a-3p	hsa-miR-142-5p	hsa-miR-146a-5p	hsa-miR-186-5p/hsa-miR-186-5p	hsa-miR-205-5p	hsa-miR-27b-3p	hsa-miR-29a-3p/hsa-miR-29b-3p	hsa-miR-302b-3p/hsa-miR-520a-3p	hsa-miR-424-5p	hsa-miR-448
CNOT7	0.0441796	0.567546	0.614876	11	hsa-miR-128-3p/hsa-miR-128-3p/hsa-miR-216a-3p	hsa-miR-186-5p/hsa-miR-186-5p	hsa-miR-216b-5p	hsa-miR-27b-3p	hsa-miR-28-3p	hsa-miR-371a-5p	hsa-miR-381-3p	hsa-miR-429	hsa-miR-494-3p	hsa-miR-7-5p	hsa-miR-9-5p
MAP2K6	0.0441796	0.567546	0.614876	11	hsa-miR-142-5p	hsa-miR-27b-3p	hsa-miR-29a-3p/hsa-miR-29b-3p	hsa-miR-30b-5p/hsa-miR-30c-5p/hsa-miR-30d-5p	hsa-miR-362-3p	hsa-miR-374a-5p	hsa-miR-422a	hsa-miR-424-5p	hsa-miR-425-5p	hsa-miR-448	hsa-miR-494-3p
SNX30	0.0441796	0.567546	0.614876	11	hsa-let-7b-5p/hsa-let-7e-5p/hsa-let-7f-5p	hsa-miR-138-5p	hsa-miR-186-5p/hsa-miR-186-5p	hsa-miR-216b-5p	hsa-miR-26a-5p	hsa-miR-302b-3p/hsa-miR-520a-3p	hsa-miR-30b-5p/hsa-miR-30c-5p/hsa-miR-30d-5p	hsa-miR-34a-5p/hsa-miR-34c-5p/hsa-miR-449a/hsa-miR-449b-5p	hsa-miR-429	hsa-miR-92a-3p/hsa-miR-92b-3p	hsa-miR-9-5p
TRERF1	0.0441796	0.567546	0.614876	11	hsa-miR-128-3p/hsa-miR-128-3p/hsa-miR-216a-3p	hsa-miR-26a-5p	hsa-miR-27b-3p	hsa-miR-30b-5p/hsa-miR-30c-5p/hsa-miR-30d-5p	hsa-miR-362-3p	hsa-miR-371a-5p	hsa-miR-374a-5p	hsa-miR-381-3p	hsa-miR-494-3p	hsa-miR-501-3p	hsa-miR-9-5p
WEE1	0.0441796	0.567546	0.614876	11	hsa-miR-128-3p/hsa-miR-128-3p/hsa-miR-216a-3p	hsa-miR-138-5p	hsa-miR-140-5p	hsa-miR-155-5p	hsa-miR-204-5p	hsa-miR-26a-5p	hsa-miR-27b-3p	hsa-miR-302b-3p/hsa-miR-520a-3p	hsa-miR-381-3p	hsa-miR-424-5p	hsa-miR-9-5p
BRWD1	0.0463248	0.567546	0.636364	12	hsa-miR-125a-5p/hsa-miR-125b-5p	hsa-miR-135a-5p	hsa-miR-141-3p/hsa-miR-200a-3p	hsa-miR-142-5p	hsa-miR-155-5p	hsa-miR-21-5p	hsa-miR-26a-5p	hsa-miR-29a-3p/hsa-miR-29b-3p	hsa-miR-302b-3p/hsa-miR-520a-3p	hsa-miR-30b-5p/hsa-miR-30c-5p/hsa-miR-30d-5p	hsa-miR-429	hsa-miR-7-5p
SAMD8	0.0463248	0.567546	0.636364	12	hsa-miR-135a-5p	hsa-miR-141-3p/hsa-miR-200a-3p	hsa-miR-142-5p	hsa-miR-146a-5p	hsa-miR-186-5p/hsa-miR-186-5p	hsa-miR-21-5p	hsa-miR-26a-5p	hsa-miR-30b-5p/hsa-miR-30c-5p/hsa-miR-30d-5p	hsa-miR-362-5p	hsa-miR-422a	hsa-miR-429	hsa-miR-9-5p
TMEM170B	0.0463248	0.567546	0.636364	12	hsa-miR-125a-5p/hsa-miR-125b-5p	hsa-miR-128-3p/hsa-miR-128-3p/hsa-miR-216a-3p	hsa-miR-141-3p/hsa-miR-200a-3p	hsa-miR-186-5p/hsa-miR-186-5p	hsa-miR-27b-3p	hsa-miR-302b-3p/hsa-miR-520a-3p	hsa-miR-30b-5p/hsa-miR-30c-5p/hsa-miR-30d-5p	hsa-miR-381-3p	hsa-miR-424-5p	hsa-miR-429	hsa-miR-448	hsa-miR-9-5p
ACOT7	0.0468244	0.567546	0.218182	2	hsa-miR-141-3p/hsa-miR-200a-3p	hsa-miR-9-5p
AICDA	0.0468244	0.567546	0.218182	2	hsa-miR-155-5p	hsa-miR-27b-3p
AL031666.2	0.0468244	0.567546	0.218182	2	hsa-miR-205-5p	hsa-miR-455-5p
ANKRD54	0.0468244	0.567546	0.218182	2	hsa-miR-138-5p	hsa-miR-302b-3p/hsa-miR-520a-3p
ANO10	0.0468244	0.567546	0.218182	2	hsa-miR-138-5p	hsa-miR-205-5p
APBB3	0.0468244	0.567546	0.218182	2	hsa-let-7b-5p/hsa-let-7e-5p/hsa-let-7f-5p	hsa-miR-142-5p
ARHGAP23	0.0468244	0.567546	0.218182	2	hsa-miR-141-3p/hsa-miR-200a-3p	hsa-miR-374a-5p
ASCC3	0.0468244	0.567546	0.218182	2	hsa-miR-26a-5p	hsa-miR-30b-5p/hsa-miR-30c-5p/hsa-miR-30d-5p
AVEN	0.0468244	0.567546	0.218182	2	hsa-miR-30b-5p/hsa-miR-30c-5p/hsa-miR-30d-5p	hsa-miR-424-5p
BZW2	0.0468244	0.567546	0.218182	2	hsa-let-7b-5p/hsa-let-7e-5p/hsa-let-7f-5p	hsa-miR-135a-5p
C11orf24	0.0468244	0.567546	0.218182	2	hsa-miR-424-5p	hsa-miR-92a-3p/hsa-miR-92b-3p
C15orf38	0.0468244	0.567546	0.218182	2	hsa-miR-138-5p	hsa-miR-371a-5p
C15orf56	0.0468244	0.567546	0.218182	2	hsa-miR-186-5p/hsa-miR-186-5p	hsa-miR-9-5p
C17orf59	0.0468244	0.567546	0.218182	2	hsa-miR-125a-5p/hsa-miR-125b-5p	hsa-miR-424-5p
C20orf196	0.0468244	0.567546	0.218182	2	hsa-miR-362-3p	hsa-miR-423-5p
C21orf33	0.0468244	0.567546	0.218182	2	hsa-miR-146a-5p	hsa-miR-204-5p
C2CD4A	0.0468244	0.567546	0.218182	2	hsa-miR-27b-3p	hsa-miR-34a-5p/hsa-miR-34c-5p/hsa-miR-449a/hsa-miR-449b-5p
C9orf3	0.0468244	0.567546	0.218182	2	hsa-miR-135a-5p	hsa-miR-186-5p/hsa-miR-186-5p
CALB2	0.0468244	0.567546	0.218182	2	hsa-miR-30b-5p/hsa-miR-30c-5p/hsa-miR-30d-5p	hsa-miR-9-5p
CAMK1	0.0468244	0.567546	0.218182	2	hsa-miR-204-5p	hsa-miR-494-3p
CD6	0.0468244	0.567546	0.218182	2	hsa-miR-216a-5p	hsa-miR-216b-5p
CENPK	0.0468244	0.567546	0.218182	2	hsa-miR-186-5p/hsa-miR-186-5p	hsa-miR-362-5p
CLP1	0.0468244	0.567546	0.218182	2	hsa-let-7b-5p/hsa-let-7e-5p/hsa-let-7f-5p	hsa-miR-128-3p/hsa-miR-128-3p/hsa-miR-216a-3p
CRB2	0.0468244	0.567546	0.218182	2	hsa-let-7b-5p/hsa-let-7e-5p/hsa-let-7f-5p	hsa-miR-125a-5p/hsa-miR-125b-5p
CTNNA1	0.0468244	0.567546	0.218182	2	hsa-miR-205-5p	hsa-miR-9-5p
CYP39A1	0.0468244	0.567546	0.218182	2	hsa-miR-128-3p/hsa-miR-128-3p/hsa-miR-216a-3p	hsa-miR-27b-3p
DCTN1	0.0468244	0.567546	0.218182	2	hsa-miR-125a-5p/hsa-miR-125b-5p	hsa-miR-9-5p
DDX26B	0.0468244	0.567546	0.218182	2	hsa-let-7b-5p/hsa-let-7e-5p/hsa-let-7f-5p	hsa-miR-429
DHODH	0.0468244	0.567546	0.218182	2	hsa-miR-135a-5p	hsa-miR-186-5p/hsa-miR-186-5p
DHX9	0.0468244	0.567546	0.218182	2	hsa-miR-186-5p/hsa-miR-186-5p	hsa-miR-429
DMP1	0.0468244	0.567546	0.218182	2	hsa-let-7b-5p/hsa-let-7e-5p/hsa-let-7f-5p	hsa-miR-92a-3p/hsa-miR-92b-3p
DPYSL4	0.0468244	0.567546	0.218182	2	hsa-miR-125a-5p/hsa-miR-125b-5p	hsa-miR-34a-5p/hsa-miR-34c-5p/hsa-miR-449a/hsa-miR-449b-5p
DRAM2	0.0468244	0.567546	0.218182	2	hsa-miR-125a-5p/hsa-miR-125b-5p	hsa-miR-135a-5p
EBI3	0.0468244	0.567546	0.218182	2	hsa-miR-27b-3p	hsa-miR-424-5p
EFCAB4A	0.0468244	0.567546	0.218182	2	hsa-miR-205-5p	hsa-miR-424-5p
ERCC4	0.0468244	0.567546	0.218182	2	hsa-let-7b-5p/hsa-let-7e-5p/hsa-let-7f-5p	hsa-miR-28-3p
FAM71F1	0.0468244	0.567546	0.218182	2	hsa-miR-135a-5p	hsa-miR-26a-5p
FASN	0.0468244	0.567546	0.218182	2	hsa-miR-27b-3p	hsa-miR-424-5p
FBLN2	0.0468244	0.567546	0.218182	2	hsa-miR-128-3p/hsa-miR-128-3p/hsa-miR-216a-3p	hsa-miR-27b-3p
FCHO1	0.0468244	0.567546	0.218182	2	hsa-miR-142-5p	hsa-miR-29a-3p/hsa-miR-29b-3p
FGF20	0.0468244	0.567546	0.218182	2	hsa-miR-204-5p	hsa-miR-30b-5p/hsa-miR-30c-5p/hsa-miR-30d-5p
FNDC8	0.0468244	0.567546	0.218182	2	hsa-miR-138-5p	hsa-miR-34a-5p/hsa-miR-34c-5p/hsa-miR-449a/hsa-miR-449b-5p
FUT1	0.0468244	0.567546	0.218182	2	hsa-miR-125a-5p/hsa-miR-125b-5p	hsa-miR-140-5p
GLRX	0.0468244	0.567546	0.218182	2	hsa-let-7b-5p/hsa-let-7e-5p/hsa-let-7f-5p	hsa-miR-141-3p/hsa-miR-200a-3p
GOSR2	0.0468244	0.567546	0.218182	2	hsa-miR-27b-3p	hsa-miR-429
KBTBD4	0.0468244	0.567546	0.218182	2	hsa-miR-138-5p	hsa-miR-146a-5p
LPL	0.0468244	0.567546	0.218182	2	hsa-miR-27b-3p	hsa-miR-29a-3p/hsa-miR-29b-3p
MAMSTR	0.0468244	0.567546	0.218182	2	hsa-miR-423-5p	hsa-miR-424-5p
MAN1B1	0.0468244	0.567546	0.218182	2	hsa-miR-125a-5p/hsa-miR-125b-5p	hsa-miR-30b-5p/hsa-miR-30c-5p/hsa-miR-30d-5p
MAN2A2	0.0468244	0.567546	0.218182	2	hsa-miR-128-3p/hsa-miR-128-3p/hsa-miR-216a-3p	hsa-miR-27b-3p
MFAP5	0.0468244	0.567546	0.218182	2	hsa-miR-151a-3p	hsa-miR-429
MKNK1	0.0468244	0.567546	0.218182	2	hsa-miR-424-5p	hsa-miR-7-5p
MOSPD3	0.0468244	0.567546	0.218182	2	hsa-miR-128-3p/hsa-miR-128-3p/hsa-miR-216a-3p	hsa-miR-27b-3p
NDUFS4	0.0468244	0.567546	0.218182	2	hsa-miR-128-3p/hsa-miR-128-3p/hsa-miR-216a-3p	hsa-miR-27b-3p
NGEF	0.0468244	0.567546	0.218182	2	hsa-miR-155-5p	hsa-miR-429
NHP2L1	0.0468244	0.567546	0.218182	2	hsa-miR-205-5p	hsa-miR-9-5p
NIT2	0.0468244	0.567546	0.218182	2	hsa-miR-186-5p/hsa-miR-186-5p	hsa-miR-29a-3p/hsa-miR-29b-3p
NRIP2	0.0468244	0.567546	0.218182	2	hsa-miR-128-3p/hsa-miR-128-3p/hsa-miR-216a-3p	hsa-miR-27b-3p
OMG	0.0468244	0.567546	0.218182	2	hsa-miR-30b-5p/hsa-miR-30c-5p/hsa-miR-30d-5p	hsa-miR-424-5p
PCGF6	0.0468244	0.567546	0.218182	2	hsa-miR-125a-5p/hsa-miR-125b-5p	hsa-miR-9-5p
PIGW	0.0468244	0.567546	0.218182	2	hsa-miR-141-3p/hsa-miR-200a-3p	hsa-miR-374a-5p
PIK3CD	0.0468244	0.567546	0.218182	2	hsa-miR-30b-5p/hsa-miR-30c-5p/hsa-miR-30d-5p	hsa-miR-7-5p
PIN1	0.0468244	0.567546	0.218182	2	hsa-miR-140-5p	hsa-miR-429
PLOD1	0.0468244	0.567546	0.218182	2	hsa-miR-140-5p	hsa-miR-34a-5p/hsa-miR-34c-5p/hsa-miR-449a/hsa-miR-449b-5p
PNOC	0.0468244	0.567546	0.218182	2	hsa-miR-34a-5p/hsa-miR-34c-5p/hsa-miR-449a/hsa-miR-449b-5p	hsa-miR-494-3p
POT1	0.0468244	0.567546	0.218182	2	hsa-miR-142-5p	hsa-miR-384
PPP4C	0.0468244	0.567546	0.218182	2	hsa-miR-128-3p/hsa-miR-128-3p/hsa-miR-216a-3p	hsa-miR-27b-3p
PPT2	0.0468244	0.567546	0.218182	2	hsa-miR-141-3p/hsa-miR-200a-3p	hsa-miR-424-5p
PRR14	0.0468244	0.567546	0.218182	2	hsa-miR-28-3p	hsa-miR-494-3p
PSMB8	0.0468244	0.567546	0.218182	2	hsa-miR-125a-5p/hsa-miR-125b-5p	hsa-miR-451a
PSMD7	0.0468244	0.567546	0.218182	2	hsa-miR-30b-5p/hsa-miR-30c-5p/hsa-miR-30d-5p	hsa-miR-424-5p
PSRC1	0.0468244	0.567546	0.218182	2	hsa-miR-140-5p	hsa-miR-21-5p
PTK2	0.0468244	0.567546	0.218182	2	hsa-miR-135a-5p	hsa-miR-138-5p
RAB20	0.0468244	0.567546	0.218182	2	hsa-miR-128-3p/hsa-miR-128-3p/hsa-miR-216a-3p	hsa-miR-27b-3p
REEP4	0.0468244	0.567546	0.218182	2	hsa-miR-26a-5p	hsa-miR-9-5p
RIC8A	0.0468244	0.567546	0.218182	2	hsa-miR-29a-3p/hsa-miR-29b-3p	hsa-miR-424-5p
RIN3	0.0468244	0.567546	0.218182	2	hsa-miR-125a-5p/hsa-miR-125b-5p	hsa-miR-204-5p
RLTPR	0.0468244	0.567546	0.218182	2	hsa-miR-216a-5p	hsa-miR-216b-5p
RUFY1	0.0468244	0.567546	0.218182	2	hsa-miR-146a-5p	hsa-miR-494-3p
RUSC2	0.0468244	0.567546	0.218182	2	hsa-miR-125a-5p/hsa-miR-125b-5p	hsa-miR-429
SNAPC3	0.0468244	0.567546	0.218182	2	hsa-miR-186-5p/hsa-miR-186-5p	hsa-miR-30b-5p/hsa-miR-30c-5p/hsa-miR-30d-5p
SORCS2	0.0468244	0.567546	0.218182	2	hsa-miR-125a-5p/hsa-miR-125b-5p	hsa-miR-455-5p
SYTL2	0.0468244	0.567546	0.218182	2	hsa-miR-384	hsa-miR-424-5p
TMEM38A	0.0468244	0.567546	0.218182	2	hsa-miR-424-5p	hsa-miR-9-5p
TOMM22	0.0468244	0.567546	0.218182	2	hsa-miR-425-5p	hsa-miR-455-5p
TOMM6	0.0468244	0.567546	0.218182	2	hsa-miR-135a-5p	hsa-miR-186-5p/hsa-miR-186-5p
TRAFD1	0.0468244	0.567546	0.218182	2	hsa-miR-29a-3p/hsa-miR-29b-3p	hsa-miR-34a-5p/hsa-miR-34c-5p/hsa-miR-449a/hsa-miR-449b-5p
TTC19	0.0468244	0.567546	0.218182	2	hsa-miR-205-5p	hsa-miR-34a-5p/hsa-miR-34c-5p/hsa-miR-449a/hsa-miR-449b-5p
TXN2	0.0468244	0.567546	0.218182	2	hsa-miR-27b-3p	hsa-miR-424-5p
UBAC1	0.0468244	0.567546	0.218182	2	hsa-miR-186-5p/hsa-miR-186-5p	hsa-miR-30b-5p/hsa-miR-30c-5p/hsa-miR-30d-5p
USP22	0.0468244	0.567546	0.218182	2	hsa-miR-30b-5p/hsa-miR-30c-5p/hsa-miR-30d-5p	hsa-miR-425-5p
YIF1A	0.0468244	0.567546	0.218182	2	hsa-miR-296-5p	hsa-miR-423-5p
ZBTB22	0.0468244	0.567546	0.218182	2	hsa-miR-381-3p	hsa-miR-7-5p
ZKSCAN2	0.0468244	0.567546	0.218182	2	hsa-miR-128-3p/hsa-miR-128-3p/hsa-miR-216a-3p	hsa-miR-27b-3p
ZKSCAN5	0.0468244	0.567546	0.218182	2	hsa-let-7b-5p/hsa-let-7e-5p/hsa-let-7f-5p	hsa-miR-125a-5p/hsa-miR-125b-5p
ZNF488	0.0468244	0.567546	0.218182	2	hsa-miR-128-3p/hsa-miR-128-3p/hsa-miR-216a-3p	hsa-miR-455-5p
ZNF662	0.0468244	0.567546	0.218182	2	hsa-miR-26a-5p	hsa-miR-429
ZNF704	0.0474372	0.574221	0.705882	17	hsa-miR-125a-5p/hsa-miR-125b-5p	hsa-miR-128-3p/hsa-miR-128-3p/hsa-miR-216a-3p	hsa-miR-135a-5p	hsa-miR-138-5p	hsa-miR-141-3p/hsa-miR-200a-3p	hsa-miR-151a-3p	hsa-miR-21-5p	hsa-miR-27b-3p	hsa-miR-29a-3p/hsa-miR-29b-3p	hsa-miR-302b-3p/hsa-miR-520a-3p	hsa-miR-30b-5p/hsa-miR-30c-5p/hsa-miR-30d-5p	hsa-miR-374a-5p	hsa-miR-424-5p	hsa-miR-448	hsa-miR-494-3p	hsa-miR-7-5p	hsa-miR-9-5p
ABL2	0.047673	0.574814	0.654545	13	hsa-let-7b-5p/hsa-let-7e-5p/hsa-let-7f-5p	hsa-miR-125a-5p/hsa-miR-125b-5p	hsa-miR-128-3p/hsa-miR-128-3p/hsa-miR-216a-3p	hsa-miR-141-3p/hsa-miR-200a-3p	hsa-miR-146a-5p	hsa-miR-216b-5p	hsa-miR-26a-5p	hsa-miR-27b-3p	hsa-miR-302b-3p/hsa-miR-520a-3p	hsa-miR-30b-5p/hsa-miR-30c-5p/hsa-miR-30d-5p	hsa-miR-424-5p	hsa-miR-92a-3p/hsa-miR-92b-3p	hsa-miR-9-5p
KIAA2022	0.047673	0.574814	0.654545	13	hsa-let-7b-5p/hsa-let-7e-5p/hsa-let-7f-5p	hsa-miR-138-5p	hsa-miR-141-3p/hsa-miR-200a-3p	hsa-miR-142-5p	hsa-miR-204-5p	hsa-miR-26a-5p	hsa-miR-27b-3p	hsa-miR-29a-3p/hsa-miR-29b-3p	hsa-miR-371a-5p	hsa-miR-381-3p	hsa-miR-425-5p	hsa-miR-448	hsa-miR-494-3p
NPAS3	0.047673	0.574814	0.654545	13	hsa-miR-128-3p/hsa-miR-128-3p/hsa-miR-216a-3p	hsa-miR-141-3p/hsa-miR-200a-3p	hsa-miR-151a-3p	hsa-miR-204-5p	hsa-miR-21-5p	hsa-miR-27b-3p	hsa-miR-29a-3p/hsa-miR-29b-3p	hsa-miR-302b-3p/hsa-miR-520a-3p	hsa-miR-424-5p	hsa-miR-448	hsa-miR-455-5p	hsa-miR-494-3p	hsa-miR-92a-3p/hsa-miR-92b-3p
MSL2	0.0483581	0.578992	0.67013	14	hsa-miR-135a-5p	hsa-miR-142-5p	hsa-miR-204-5p	hsa-miR-205-5p	hsa-miR-216a-5p	hsa-miR-27b-3p	hsa-miR-28-3p	hsa-miR-296-3p	hsa-miR-34a-5p/hsa-miR-34c-5p/hsa-miR-449a/hsa-miR-449b-5p	hsa-miR-371a-5p	hsa-miR-381-3p	hsa-miR-425-5p	hsa-miR-429	hsa-miR-494-3p
CCNT2	0.0484898	0.578992	0.683636	15	hsa-let-7b-5p/hsa-let-7e-5p/hsa-let-7f-5p	hsa-miR-128-3p/hsa-miR-128-3p/hsa-miR-216a-3p	hsa-miR-141-3p/hsa-miR-200a-3p	hsa-miR-142-5p	hsa-miR-186-5p/hsa-miR-186-5p	hsa-miR-204-5p	hsa-miR-216b-5p	hsa-miR-29a-3p/hsa-miR-29b-3p	hsa-miR-30b-5p/hsa-miR-30c-5p/hsa-miR-30d-5p	hsa-miR-384	hsa-miR-424-5p	hsa-miR-429	hsa-miR-494-3p	hsa-miR-7-5p	hsa-miR-9-5p
C11orf87	0.0488971	0.578992	0.581818	9	hsa-miR-128-3p/hsa-miR-128-3p/hsa-miR-216a-3p	hsa-miR-142-5p	hsa-miR-21-5p	hsa-miR-27b-3p	hsa-miR-29a-3p/hsa-miR-29b-3p	hsa-miR-374a-5p	hsa-miR-429	hsa-miR-448	hsa-miR-92a-3p/hsa-miR-92b-3p
FOXN2	0.0488971	0.578992	0.581818	9	hsa-miR-135a-5p	hsa-miR-140-5p	hsa-miR-186-5p/hsa-miR-186-5p	hsa-miR-29a-3p/hsa-miR-29b-3p	hsa-miR-30b-5p/hsa-miR-30c-5p/hsa-miR-30d-5p	hsa-miR-34a-5p/hsa-miR-34c-5p/hsa-miR-449a/hsa-miR-449b-5p	hsa-miR-429	hsa-miR-92a-3p/hsa-miR-92b-3p	hsa-miR-9-5p
MARK1	0.0488971	0.578992	0.581818	9	hsa-miR-140-5p	hsa-miR-141-3p/hsa-miR-200a-3p	hsa-miR-146a-5p	hsa-miR-26a-5p	hsa-miR-27b-3p	hsa-miR-302b-3p/hsa-miR-520a-3p	hsa-miR-30b-5p/hsa-miR-30c-5p/hsa-miR-30d-5p	hsa-miR-381-3p	hsa-miR-92a-3p/hsa-miR-92b-3p
NETO1	0.0488971	0.578992	0.581818	9	hsa-miR-128-3p/hsa-miR-128-3p/hsa-miR-216a-3p	hsa-miR-138-5p	hsa-miR-142-5p	hsa-miR-26a-5p	hsa-miR-27b-3p	hsa-miR-34a-5p/hsa-miR-34c-5p/hsa-miR-449a/hsa-miR-449b-5p	hsa-miR-371a-5p	hsa-miR-425-5p	hsa-miR-92a-3p/hsa-miR-92b-3p
NR5A2	0.0488971	0.578992	0.581818	9	hsa-miR-125a-5p/hsa-miR-125b-5p	hsa-miR-128-3p/hsa-miR-128-3p/hsa-miR-216a-3p	hsa-miR-186-5p/hsa-miR-186-5p	hsa-miR-216a-5p	hsa-miR-27b-3p	hsa-miR-30b-5p/hsa-miR-30c-5p/hsa-miR-30d-5p	hsa-miR-381-3p	hsa-miR-429	hsa-miR-9-5p
PDE10A	0.0488971	0.578992	0.581818	9	hsa-miR-128-3p/hsa-miR-128-3p/hsa-miR-216a-3p	hsa-miR-186-5p/hsa-miR-186-5p	hsa-miR-27b-3p	hsa-miR-362-3p	hsa-miR-371a-5p	hsa-miR-374a-5p	hsa-miR-381-3p	hsa-miR-448	hsa-miR-92a-3p/hsa-miR-92b-3p
ROCK2	0.0488971	0.578992	0.581818	9	hsa-miR-135a-5p	hsa-miR-138-5p	hsa-miR-142-5p	hsa-miR-205-5p	hsa-miR-302b-3p/hsa-miR-520a-3p	hsa-miR-30b-5p/hsa-miR-30c-5p/hsa-miR-30d-5p	hsa-miR-381-3p	hsa-miR-424-5p	hsa-miR-429
ROR1	0.0488971	0.578992	0.581818	9	hsa-miR-128-3p/hsa-miR-128-3p/hsa-miR-216a-3p	hsa-miR-140-5p	hsa-miR-142-5p	hsa-miR-204-5p	hsa-miR-21-5p	hsa-miR-27b-3p	hsa-miR-30b-5p/hsa-miR-30c-5p/hsa-miR-30d-5p	hsa-miR-424-5p	hsa-miR-448
SERP1	0.0488971	0.578992	0.581818	9	hsa-miR-142-5p	hsa-miR-21-5p	hsa-miR-26a-5p	hsa-miR-27b-3p	hsa-miR-302b-3p/hsa-miR-520a-3p	hsa-miR-425-5p	hsa-miR-455-5p	hsa-miR-494-3p	hsa-miR-7-5p
SKI	0.0488971	0.578992	0.581818	9	hsa-miR-135a-5p	hsa-miR-155-5p	hsa-miR-204-5p	hsa-miR-21-5p	hsa-miR-29a-3p/hsa-miR-29b-3p	hsa-miR-374a-5p	hsa-miR-424-5p	hsa-miR-448	hsa-miR-92a-3p/hsa-miR-92b-3p
SNX18	0.0488971	0.578992	0.581818	9	hsa-miR-125a-5p/hsa-miR-125b-5p	hsa-miR-128-3p/hsa-miR-128-3p/hsa-miR-216a-3p	hsa-miR-135a-5p	hsa-miR-141-3p/hsa-miR-200a-3p	hsa-miR-186-5p/hsa-miR-186-5p	hsa-miR-204-5p	hsa-miR-27b-3p	hsa-miR-30b-5p/hsa-miR-30c-5p/hsa-miR-30d-5p	hsa-miR-362-5p
TTC28	0.0488971	0.578992	0.581818	9	hsa-miR-128-3p/hsa-miR-128-3p/hsa-miR-216a-3p	hsa-miR-141-3p/hsa-miR-200a-3p	hsa-miR-142-5p	hsa-miR-204-5p	hsa-miR-216a-5p	hsa-miR-26a-5p	hsa-miR-30b-5p/hsa-miR-30c-5p/hsa-miR-30d-5p	hsa-miR-448	hsa-miR-92a-3p/hsa-miR-92b-3p
BCORL1	0.050202	0.584698	0.52987	7	hsa-miR-128-3p/hsa-miR-128-3p/hsa-miR-216a-3p	hsa-miR-146a-5p	hsa-miR-155-5p	hsa-miR-27b-3p	hsa-miR-29a-3p/hsa-miR-29b-3p	hsa-miR-371a-5p	hsa-miR-423-3p
DIXDC1	0.050202	0.584698	0.52987	7	hsa-miR-186-5p/hsa-miR-186-5p	hsa-miR-216b-5p	hsa-miR-29a-3p/hsa-miR-29b-3p	hsa-miR-34a-5p/hsa-miR-34c-5p/hsa-miR-449a/hsa-miR-449b-5p	hsa-miR-424-5p	hsa-miR-429	hsa-miR-9-5p
GAB2	0.050202	0.584698	0.52987	7	hsa-let-7b-5p/hsa-let-7e-5p/hsa-let-7f-5p	hsa-miR-125a-5p/hsa-miR-125b-5p	hsa-miR-138-5p	hsa-miR-296-5p	hsa-miR-29a-3p/hsa-miR-29b-3p	hsa-miR-302b-3p/hsa-miR-520a-3p	hsa-miR-9-5p
GNS	0.050202	0.584698	0.52987	7	hsa-let-7b-5p/hsa-let-7e-5p/hsa-let-7f-5p	hsa-miR-128-3p/hsa-miR-128-3p/hsa-miR-216a-3p	hsa-miR-27b-3p	hsa-miR-29a-3p/hsa-miR-29b-3p	hsa-miR-302b-3p/hsa-miR-520a-3p	hsa-miR-425-5p	hsa-miR-92a-3p/hsa-miR-92b-3p
GOLGA1	0.050202	0.584698	0.52987	7	hsa-miR-27b-3p	hsa-miR-302b-3p/hsa-miR-520a-3p	hsa-miR-30b-5p/hsa-miR-30c-5p/hsa-miR-30d-5p	hsa-miR-381-3p	hsa-miR-424-5p	hsa-miR-429	hsa-miR-92a-3p/hsa-miR-92b-3p
KIAA1522	0.050202	0.584698	0.52987	7	hsa-miR-125a-5p/hsa-miR-125b-5p	hsa-miR-186-5p/hsa-miR-186-5p	hsa-miR-302b-3p/hsa-miR-520a-3p	hsa-miR-30b-5p/hsa-miR-30c-5p/hsa-miR-30d-5p	hsa-miR-422a	hsa-miR-448	hsa-miR-501-3p
MBTPS2	0.050202	0.584698	0.52987	7	hsa-let-7b-5p/hsa-let-7e-5p/hsa-let-7f-5p	hsa-miR-138-5p	hsa-miR-141-3p/hsa-miR-200a-3p	hsa-miR-204-5p	hsa-miR-30b-5p/hsa-miR-30c-5p/hsa-miR-30d-5p	hsa-miR-424-5p	hsa-miR-494-3p
MED13L	0.050202	0.584698	0.52987	7	hsa-miR-128-3p/hsa-miR-128-3p/hsa-miR-216a-3p	hsa-miR-141-3p/hsa-miR-200a-3p	hsa-miR-205-5p	hsa-miR-26a-5p	hsa-miR-381-3p	hsa-miR-448	hsa-miR-7-5p
SEMA4F	0.050202	0.584698	0.52987	7	hsa-let-7b-5p/hsa-let-7e-5p/hsa-let-7f-5p	hsa-miR-125a-5p/hsa-miR-125b-5p	hsa-miR-27b-3p	hsa-miR-296-5p	hsa-miR-34a-5p/hsa-miR-34c-5p/hsa-miR-449a/hsa-miR-449b-5p	hsa-miR-362-5p	hsa-miR-448
SPRY4	0.050202	0.584698	0.52987	7	hsa-miR-140-5p	hsa-miR-141-3p/hsa-miR-200a-3p	hsa-miR-21-5p	hsa-miR-29a-3p/hsa-miR-29b-3p	hsa-miR-302b-3p/hsa-miR-520a-3p	hsa-miR-381-3p	hsa-miR-424-5p
TBCEL	0.050202	0.584698	0.52987	7	hsa-miR-186-5p/hsa-miR-186-5p	hsa-miR-205-5p	hsa-miR-29a-3p/hsa-miR-29b-3p	hsa-miR-302b-3p/hsa-miR-520a-3p	hsa-miR-371a-5p	hsa-miR-429	hsa-miR-9-5p
TMEM120B	0.050202	0.584698	0.52987	7	hsa-miR-125a-5p/hsa-miR-125b-5p	hsa-miR-128-3p/hsa-miR-128-3p/hsa-miR-216a-3p	hsa-miR-140-5p	hsa-miR-142-5p	hsa-miR-146a-5p	hsa-miR-423-5p	hsa-miR-7-5p
VTI1B	0.050202	0.584698	0.52987	7	hsa-miR-146a-5p	hsa-miR-155-5p	hsa-miR-205-5p	hsa-miR-296-3p	hsa-miR-34a-5p/hsa-miR-34c-5p/hsa-miR-449a/hsa-miR-449b-5p	hsa-miR-424-5p	hsa-miR-429
CHD9	0.0530203	0.592372	0.610909	10	hsa-let-7b-5p/hsa-let-7e-5p/hsa-let-7f-5p	hsa-miR-141-3p/hsa-miR-200a-3p	hsa-miR-142-5p	hsa-miR-155-5p	hsa-miR-186-5p/hsa-miR-186-5p	hsa-miR-30b-5p/hsa-miR-30c-5p/hsa-miR-30d-5p	hsa-miR-381-3p	hsa-miR-424-5p	hsa-miR-429	hsa-miR-92a-3p/hsa-miR-92b-3p
DNAJB1	0.0530203	0.592372	0.610909	10	hsa-miR-125a-5p/hsa-miR-125b-5p	hsa-miR-128-3p/hsa-miR-128-3p/hsa-miR-216a-3p	hsa-miR-155-5p	hsa-miR-204-5p	hsa-miR-296-5p	hsa-miR-34a-5p/hsa-miR-34c-5p/hsa-miR-449a/hsa-miR-449b-5p	hsa-miR-362-5p	hsa-miR-371a-5p	hsa-miR-374a-5p	hsa-miR-9-5p
MDM4	0.0530203	0.592372	0.610909	10	hsa-let-7b-5p/hsa-let-7e-5p/hsa-let-7f-5p	hsa-miR-128-3p/hsa-miR-128-3p/hsa-miR-216a-3p	hsa-miR-135a-5p	hsa-miR-205-5p	hsa-miR-216b-5p	hsa-miR-27b-3p	hsa-miR-30b-5p/hsa-miR-30c-5p/hsa-miR-30d-5p	hsa-miR-34a-5p/hsa-miR-34c-5p/hsa-miR-449a/hsa-miR-449b-5p	hsa-miR-384	hsa-miR-494-3p
RFX7	0.0530203	0.592372	0.610909	10	hsa-miR-140-5p	hsa-miR-141-3p/hsa-miR-200a-3p	hsa-miR-146a-5p	hsa-miR-26a-5p	hsa-miR-29a-3p/hsa-miR-29b-3p	hsa-miR-30b-5p/hsa-miR-30c-5p/hsa-miR-30d-5p	hsa-miR-429	hsa-miR-455-5p	hsa-miR-92a-3p/hsa-miR-92b-3p	hsa-miR-9-5p
USP31	0.0530203	0.592372	0.610909	10	hsa-miR-135a-5p	hsa-miR-27b-3p	hsa-miR-29a-3p/hsa-miR-29b-3p	hsa-miR-34a-5p/hsa-miR-34c-5p/hsa-miR-449a/hsa-miR-449b-5p	hsa-miR-424-5p	hsa-miR-429	hsa-miR-448	hsa-miR-494-3p	hsa-miR-92a-3p/hsa-miR-92b-3p	hsa-miR-9-5p
KIAA1549	0.0558618	0.592372	0.634711	11	hsa-let-7b-5p/hsa-let-7e-5p/hsa-let-7f-5p	hsa-miR-128-3p/hsa-miR-128-3p/hsa-miR-216a-3p	hsa-miR-135a-5p	hsa-miR-27b-3p	hsa-miR-29a-3p/hsa-miR-29b-3p	hsa-miR-302b-3p/hsa-miR-520a-3p	hsa-miR-30b-5p/hsa-miR-30c-5p/hsa-miR-30d-5p	hsa-miR-424-5p	hsa-miR-448	hsa-miR-494-3p	hsa-miR-9-5p
LNPEP	0.0558618	0.592372	0.634711	11	hsa-miR-125a-5p/hsa-miR-125b-5p	hsa-miR-138-5p	hsa-miR-142-5p	hsa-miR-186-5p/hsa-miR-186-5p	hsa-miR-204-5p	hsa-miR-216a-5p	hsa-miR-26a-5p	hsa-miR-29a-3p/hsa-miR-29b-3p	hsa-miR-302b-3p/hsa-miR-520a-3p	hsa-miR-422a	hsa-miR-448
PAPPA	0.0558618	0.592372	0.634711	11	hsa-let-7b-5p/hsa-let-7e-5p/hsa-let-7f-5p	hsa-miR-128-3p/hsa-miR-128-3p/hsa-miR-216a-3p	hsa-miR-138-5p	hsa-miR-141-3p/hsa-miR-200a-3p	hsa-miR-142-5p	hsa-miR-27b-3p	hsa-miR-362-3p	hsa-miR-374a-5p	hsa-miR-424-5p	hsa-miR-448	hsa-miR-7-5p
PEG10	0.0558618	0.592372	0.634711	11	hsa-let-7b-5p/hsa-let-7e-5p/hsa-let-7f-5p	hsa-miR-128-3p/hsa-miR-128-3p/hsa-miR-216a-3p	hsa-miR-138-5p	hsa-miR-186-5p/hsa-miR-186-5p	hsa-miR-204-5p	hsa-miR-27b-3p	hsa-miR-29a-3p/hsa-miR-29b-3p	hsa-miR-34a-5p/hsa-miR-34c-5p/hsa-miR-449a/hsa-miR-449b-5p	hsa-miR-362-3p	hsa-miR-362-5p	hsa-miR-501-3p
SMARCA5	0.0558618	0.592372	0.634711	11	hsa-miR-100-5p	hsa-miR-146a-5p	hsa-miR-186-5p/hsa-miR-186-5p	hsa-miR-204-5p	hsa-miR-26a-5p	hsa-miR-30b-5p/hsa-miR-30c-5p/hsa-miR-30d-5p	hsa-miR-381-3p	hsa-miR-425-5p	hsa-miR-494-3p	hsa-miR-92a-3p/hsa-miR-92b-3p	hsa-miR-9-5p
TRPM3	0.0558618	0.592372	0.634711	11	hsa-miR-135a-5p	hsa-miR-151a-3p	hsa-miR-204-5p	hsa-miR-302b-3p/hsa-miR-520a-3p	hsa-miR-30b-5p/hsa-miR-30c-5p/hsa-miR-30d-5p	hsa-miR-34a-5p/hsa-miR-34c-5p/hsa-miR-449a/hsa-miR-449b-5p	hsa-miR-374a-5p	hsa-miR-424-5p	hsa-miR-429	hsa-miR-494-3p	hsa-miR-92a-3p/hsa-miR-92b-3p
C11orf84	0.0576683	0.592372	0.509091	6	hsa-let-7b-5p/hsa-let-7e-5p/hsa-let-7f-5p	hsa-miR-128-3p/hsa-miR-128-3p/hsa-miR-216a-3p	hsa-miR-27b-3p	hsa-miR-30b-5p/hsa-miR-30c-5p/hsa-miR-30d-5p	hsa-miR-381-3p	hsa-miR-455-5p
C15orf61	0.0576683	0.592372	0.509091	6	hsa-miR-155-5p	hsa-miR-205-5p	hsa-miR-26a-5p	hsa-miR-381-3p	hsa-miR-422a	hsa-miR-424-5p
CAB39	0.0576683	0.592372	0.509091	6	hsa-miR-155-5p	hsa-miR-27b-3p	hsa-miR-424-5p	hsa-miR-425-5p	hsa-miR-429	hsa-miR-451a
CSMD3	0.0576683	0.592372	0.509091	6	hsa-miR-142-5p	hsa-miR-216a-5p	hsa-miR-216b-5p	hsa-miR-429	hsa-miR-7-5p	hsa-miR-92a-3p/hsa-miR-92b-3p
DLGAP4	0.0576683	0.592372	0.509091	6	hsa-let-7b-5p/hsa-let-7e-5p/hsa-let-7f-5p	hsa-miR-30b-5p/hsa-miR-30c-5p/hsa-miR-30d-5p	hsa-miR-362-3p	hsa-miR-423-5p	hsa-miR-448	hsa-miR-455-5p
DNAJC27	0.0576683	0.592372	0.509091	6	hsa-miR-135a-5p	hsa-miR-186-5p/hsa-miR-186-5p	hsa-miR-27b-3p	hsa-miR-302b-3p/hsa-miR-520a-3p	hsa-miR-425-5p	hsa-miR-92a-3p/hsa-miR-92b-3p
EED	0.0576683	0.592372	0.509091	6	hsa-miR-186-5p/hsa-miR-186-5p	hsa-miR-29a-3p/hsa-miR-29b-3p	hsa-miR-30b-5p/hsa-miR-30c-5p/hsa-miR-30d-5p	hsa-miR-424-5p	hsa-miR-429	hsa-miR-7-5p
FAM134C	0.0576683	0.592372	0.509091	6	hsa-miR-125a-5p/hsa-miR-125b-5p	hsa-miR-128-3p/hsa-miR-128-3p/hsa-miR-216a-3p	hsa-miR-27b-3p	hsa-miR-302b-3p/hsa-miR-520a-3p	hsa-miR-381-3p	hsa-miR-424-5p
FAM84B	0.0576683	0.592372	0.509091	6	hsa-let-7b-5p/hsa-let-7e-5p/hsa-let-7f-5p	hsa-miR-128-3p/hsa-miR-128-3p/hsa-miR-216a-3p	hsa-miR-141-3p/hsa-miR-200a-3p	hsa-miR-205-5p	hsa-miR-27b-3p	hsa-miR-29a-3p/hsa-miR-29b-3p
ING2	0.0576683	0.592372	0.509091	6	hsa-miR-186-5p/hsa-miR-186-5p	hsa-miR-29a-3p/hsa-miR-29b-3p	hsa-miR-424-5p	hsa-miR-429	hsa-miR-448	hsa-miR-92a-3p/hsa-miR-92b-3p
LBH	0.0576683	0.592372	0.509091	6	hsa-let-7b-5p/hsa-let-7e-5p/hsa-let-7f-5p	hsa-miR-125a-5p/hsa-miR-125b-5p	hsa-miR-128-3p/hsa-miR-128-3p/hsa-miR-216a-3p	hsa-miR-205-5p	hsa-miR-27b-3p	hsa-miR-362-3p
MTUS1	0.0576683	0.592372	0.509091	6	hsa-let-7b-5p/hsa-let-7e-5p/hsa-let-7f-5p	hsa-miR-125a-5p/hsa-miR-125b-5p	hsa-miR-135a-5p	hsa-miR-302b-3p/hsa-miR-520a-3p	hsa-miR-34a-5p/hsa-miR-34c-5p/hsa-miR-449a/hsa-miR-449b-5p	hsa-miR-494-3p
NRG3	0.0576683	0.592372	0.509091	6	hsa-miR-125a-5p/hsa-miR-125b-5p	hsa-miR-155-5p	hsa-miR-204-5p	hsa-miR-30b-5p/hsa-miR-30c-5p/hsa-miR-30d-5p	hsa-miR-448	hsa-miR-494-3p
PLEKHH1	0.0576683	0.592372	0.509091	6	hsa-let-7b-5p/hsa-let-7e-5p/hsa-let-7f-5p	hsa-miR-128-3p/hsa-miR-128-3p/hsa-miR-216a-3p	hsa-miR-26a-5p	hsa-miR-27b-3p	hsa-miR-424-5p	hsa-miR-494-3p
PPP6R3	0.0576683	0.592372	0.509091	6	hsa-miR-135a-5p	hsa-miR-138-5p	hsa-miR-27b-3p	hsa-miR-424-5p	hsa-miR-429	hsa-miR-9-5p
RAB11FIP2	0.0576683	0.592372	0.509091	6	hsa-miR-155-5p	hsa-miR-27b-3p	hsa-miR-381-3p	hsa-miR-424-5p	hsa-miR-429	hsa-miR-448
RAD51D	0.0576683	0.592372	0.509091	6	hsa-miR-128-3p/hsa-miR-128-3p/hsa-miR-216a-3p	hsa-miR-28-3p	hsa-miR-296-5p	hsa-miR-448	hsa-miR-494-3p	hsa-miR-92a-3p/hsa-miR-92b-3p
REL	0.0576683	0.592372	0.509091	6	hsa-let-7b-5p/hsa-let-7e-5p/hsa-let-7f-5p	hsa-miR-146a-5p	hsa-miR-186-5p/hsa-miR-186-5p	hsa-miR-29a-3p/hsa-miR-29b-3p	hsa-miR-381-3p	hsa-miR-429
RTF1	0.0576683	0.592372	0.509091	6	hsa-miR-26a-5p	hsa-miR-34a-5p/hsa-miR-34c-5p/hsa-miR-449a/hsa-miR-449b-5p	hsa-miR-362-3p	hsa-miR-429	hsa-miR-494-3p	hsa-miR-9-5p
SCAMP1	0.0576683	0.592372	0.509091	6	hsa-miR-26a-5p	hsa-miR-30b-5p/hsa-miR-30c-5p/hsa-miR-30d-5p	hsa-miR-371a-5p	hsa-miR-381-3p	hsa-miR-425-5p	hsa-miR-429
SMPD3	0.0576683	0.592372	0.509091	6	hsa-miR-128-3p/hsa-miR-128-3p/hsa-miR-216a-3p	hsa-miR-186-5p/hsa-miR-186-5p	hsa-miR-216a-5p	hsa-miR-27b-3p	hsa-miR-29a-3p/hsa-miR-29b-3p	hsa-miR-9-5p
STAT3	0.0576683	0.592372	0.509091	6	hsa-let-7b-5p/hsa-let-7e-5p/hsa-let-7f-5p	hsa-miR-125a-5p/hsa-miR-125b-5p	hsa-miR-21-5p	hsa-miR-296-5p	hsa-miR-29a-3p/hsa-miR-29b-3p	hsa-miR-371a-5p
TPCN1	0.0576683	0.592372	0.509091	6	hsa-miR-140-5p	hsa-miR-423-5p	hsa-miR-429	hsa-miR-448	hsa-miR-455-5p	hsa-miR-92a-3p/hsa-miR-92b-3p
ZC3H4	0.0576683	0.592372	0.509091	6	hsa-miR-204-5p	hsa-miR-216a-5p	hsa-miR-34a-5p/hsa-miR-34c-5p/hsa-miR-449a/hsa-miR-449b-5p	hsa-miR-381-3p	hsa-miR-429	hsa-miR-7-5p
ZER1	0.0576683	0.592372	0.509091	6	hsa-miR-138-5p	hsa-miR-29a-3p/hsa-miR-29b-3p	hsa-miR-34a-5p/hsa-miR-34c-5p/hsa-miR-449a/hsa-miR-449b-5p	hsa-miR-362-3p	hsa-miR-374a-5p	hsa-miR-424-5p
CACNA1C	0.0576685	0.592372	0.654545	12	hsa-miR-140-5p	hsa-miR-155-5p	hsa-miR-204-5p	hsa-miR-26a-5p	hsa-miR-29a-3p/hsa-miR-29b-3p	hsa-miR-30b-5p/hsa-miR-30c-5p/hsa-miR-30d-5p	hsa-miR-381-3p	hsa-miR-429	hsa-miR-448	hsa-miR-455-5p	hsa-miR-494-3p	hsa-miR-92a-3p/hsa-miR-92b-3p
IGF1	0.0576685	0.592372	0.654545	12	hsa-let-7b-5p/hsa-let-7e-5p/hsa-let-7f-5p	hsa-miR-128-3p/hsa-miR-128-3p/hsa-miR-216a-3p	hsa-miR-142-5p	hsa-miR-186-5p/hsa-miR-186-5p	hsa-miR-26a-5p	hsa-miR-27b-3p	hsa-miR-29a-3p/hsa-miR-29b-3p	hsa-miR-422a	hsa-miR-424-5p	hsa-miR-425-5p	hsa-miR-494-3p	hsa-miR-9-5p
NFIC	0.0576685	0.592372	0.654545	12	hsa-miR-125a-5p/hsa-miR-125b-5p	hsa-miR-204-5p	hsa-miR-296-5p	hsa-miR-29a-3p/hsa-miR-29b-3p	hsa-miR-381-3p	hsa-miR-424-5p	hsa-miR-429	hsa-miR-448	hsa-miR-494-3p	hsa-miR-7-5p	hsa-miR-92a-3p/hsa-miR-92b-3p	hsa-miR-9-5p
RNF11	0.0576685	0.592372	0.654545	12	hsa-miR-141-3p/hsa-miR-200a-3p	hsa-miR-186-5p/hsa-miR-186-5p	hsa-miR-28-3p	hsa-miR-362-5p	hsa-miR-371a-5p	hsa-miR-374a-5p	hsa-miR-381-3p	hsa-miR-384	hsa-miR-425-5p	hsa-miR-429	hsa-miR-92a-3p/hsa-miR-92b-3p	hsa-miR-9-5p
SLC4A4	0.0576685	0.592372	0.654545	12	hsa-let-7b-5p/hsa-let-7e-5p/hsa-let-7f-5p	hsa-miR-125a-5p/hsa-miR-125b-5p	hsa-miR-142-5p	hsa-miR-204-5p	hsa-miR-205-5p	hsa-miR-26a-5p	hsa-miR-381-3p	hsa-miR-424-5p	hsa-miR-429	hsa-miR-448	hsa-miR-494-3p	hsa-miR-7-5p
SLC5A3	0.0576685	0.592372	0.654545	12	hsa-miR-128-3p/hsa-miR-128-3p/hsa-miR-216a-3p	hsa-miR-141-3p/hsa-miR-200a-3p	hsa-miR-142-5p	hsa-miR-205-5p	hsa-miR-27b-3p	hsa-miR-28-3p	hsa-miR-30b-5p/hsa-miR-30c-5p/hsa-miR-30d-5p	hsa-miR-34a-5p/hsa-miR-34c-5p/hsa-miR-449a/hsa-miR-449b-5p	hsa-miR-424-5p	hsa-miR-429	hsa-miR-7-5p	hsa-miR-9-5p
YY1	0.0576685	0.592372	0.654545	12	hsa-let-7b-5p/hsa-let-7e-5p/hsa-let-7f-5p	hsa-miR-141-3p/hsa-miR-200a-3p	hsa-miR-142-5p	hsa-miR-186-5p/hsa-miR-186-5p	hsa-miR-29a-3p/hsa-miR-29b-3p	hsa-miR-30b-5p/hsa-miR-30c-5p/hsa-miR-30d-5p	hsa-miR-34a-5p/hsa-miR-34c-5p/hsa-miR-449a/hsa-miR-449b-5p	hsa-miR-381-3p	hsa-miR-384	hsa-miR-422a	hsa-miR-494-3p	hsa-miR-501-3p
CREBRF	0.0578645	0.592372	0.709091	16	hsa-miR-128-3p/hsa-miR-128-3p/hsa-miR-216a-3p	hsa-miR-141-3p/hsa-miR-200a-3p	hsa-miR-142-5p	hsa-miR-151a-3p	hsa-miR-155-5p	hsa-miR-186-5p/hsa-miR-186-5p	hsa-miR-205-5p	hsa-miR-21-5p	hsa-miR-26a-5p	hsa-miR-27b-3p	hsa-miR-302b-3p/hsa-miR-520a-3p	hsa-miR-34a-5p/hsa-miR-34c-5p/hsa-miR-449a/hsa-miR-449b-5p	hsa-miR-381-3p	hsa-miR-422a	hsa-miR-424-5p	hsa-miR-9-5p
BRD4	0.0579355	0.592372	0.572727	8	hsa-miR-125a-5p/hsa-miR-125b-5p	hsa-miR-141-3p/hsa-miR-200a-3p	hsa-miR-146a-5p	hsa-miR-204-5p	hsa-miR-362-3p	hsa-miR-381-3p	hsa-miR-448	hsa-miR-9-5p
C21orf91	0.0579355	0.592372	0.572727	8	hsa-miR-141-3p/hsa-miR-200a-3p	hsa-miR-142-5p	hsa-miR-186-5p/hsa-miR-186-5p	hsa-miR-29a-3p/hsa-miR-29b-3p	hsa-miR-30b-5p/hsa-miR-30c-5p/hsa-miR-30d-5p	hsa-miR-448	hsa-miR-92a-3p/hsa-miR-92b-3p	hsa-miR-9-5p
CCDC50	0.0579355	0.592372	0.572727	8	hsa-miR-128-3p/hsa-miR-128-3p/hsa-miR-216a-3p	hsa-miR-135a-5p	hsa-miR-216b-5p	hsa-miR-26a-5p	hsa-miR-29a-3p/hsa-miR-29b-3p	hsa-miR-448	hsa-miR-501-3p	hsa-miR-9-5p
CNIH1	0.0579355	0.592372	0.572727	8	hsa-miR-135a-5p	hsa-miR-155-5p	hsa-miR-205-5p	hsa-miR-216b-5p	hsa-miR-29a-3p/hsa-miR-29b-3p	hsa-miR-374a-5p	hsa-miR-494-3p	hsa-miR-92a-3p/hsa-miR-92b-3p
EDEM3	0.0579355	0.592372	0.572727	8	hsa-let-7b-5p/hsa-let-7e-5p/hsa-let-7f-5p	hsa-miR-128-3p/hsa-miR-128-3p/hsa-miR-216a-3p	hsa-miR-135a-5p	hsa-miR-26a-5p	hsa-miR-27b-3p	hsa-miR-30b-5p/hsa-miR-30c-5p/hsa-miR-30d-5p	hsa-miR-374a-5p	hsa-miR-9-5p
FAM107B	0.0579355	0.592372	0.572727	8	hsa-miR-125a-5p/hsa-miR-125b-5p	hsa-miR-142-5p	hsa-miR-204-5p	hsa-miR-21-5p	hsa-miR-371a-5p	hsa-miR-381-3p	hsa-miR-429	hsa-miR-9-5p
FAM73B	0.0579355	0.592372	0.572727	8	hsa-miR-128-3p/hsa-miR-128-3p/hsa-miR-216a-3p	hsa-miR-205-5p	hsa-miR-29a-3p/hsa-miR-29b-3p	hsa-miR-30b-5p/hsa-miR-30c-5p/hsa-miR-30d-5p	hsa-miR-34a-5p/hsa-miR-34c-5p/hsa-miR-449a/hsa-miR-449b-5p	hsa-miR-423-3p	hsa-miR-424-5p	hsa-miR-9-5p
FOXO3	0.0579355	0.592372	0.572727	8	hsa-miR-155-5p	hsa-miR-27b-3p	hsa-miR-28-3p	hsa-miR-29a-3p/hsa-miR-29b-3p	hsa-miR-302b-3p/hsa-miR-520a-3p	hsa-miR-30b-5p/hsa-miR-30c-5p/hsa-miR-30d-5p	hsa-miR-448	hsa-miR-9-5p
GIGYF1	0.0579355	0.592372	0.572727	8	hsa-miR-141-3p/hsa-miR-200a-3p	hsa-miR-302b-3p/hsa-miR-520a-3p	hsa-miR-30b-5p/hsa-miR-30c-5p/hsa-miR-30d-5p	hsa-miR-34a-5p/hsa-miR-34c-5p/hsa-miR-449a/hsa-miR-449b-5p	hsa-miR-362-3p	hsa-miR-424-5p	hsa-miR-429	hsa-miR-9-5p
HMGB1	0.0579355	0.592372	0.572727	8	hsa-miR-141-3p/hsa-miR-200a-3p	hsa-miR-186-5p/hsa-miR-186-5p	hsa-miR-204-5p	hsa-miR-205-5p	hsa-miR-216a-5p	hsa-miR-216b-5p	hsa-miR-34a-5p/hsa-miR-34c-5p/hsa-miR-449a/hsa-miR-449b-5p	hsa-miR-381-3p
KCNC2	0.0579355	0.592372	0.572727	8	hsa-let-7b-5p/hsa-let-7e-5p/hsa-let-7f-5p	hsa-miR-125a-5p/hsa-miR-125b-5p	hsa-miR-135a-5p	hsa-miR-141-3p/hsa-miR-200a-3p	hsa-miR-204-5p	hsa-miR-27b-3p	hsa-miR-29a-3p/hsa-miR-29b-3p	hsa-miR-424-5p
RARB	0.0579355	0.592372	0.572727	8	hsa-miR-135a-5p	hsa-miR-141-3p/hsa-miR-200a-3p	hsa-miR-146a-5p	hsa-miR-216a-5p	hsa-miR-29a-3p/hsa-miR-29b-3p	hsa-miR-30b-5p/hsa-miR-30c-5p/hsa-miR-30d-5p	hsa-miR-34a-5p/hsa-miR-34c-5p/hsa-miR-449a/hsa-miR-449b-5p	hsa-miR-424-5p
SENP5	0.0579355	0.592372	0.572727	8	hsa-let-7b-5p/hsa-let-7e-5p/hsa-let-7f-5p	hsa-miR-140-5p	hsa-miR-142-5p	hsa-miR-26a-5p	hsa-miR-296-3p	hsa-miR-30b-5p/hsa-miR-30c-5p/hsa-miR-30d-5p	hsa-miR-424-5p	hsa-miR-429
SNIP1	0.0579355	0.592372	0.572727	8	hsa-miR-138-5p	hsa-miR-142-5p	hsa-miR-29a-3p/hsa-miR-29b-3p	hsa-miR-371a-5p	hsa-miR-384	hsa-miR-424-5p	hsa-miR-494-3p	hsa-miR-9-5p
STK40	0.0579355	0.592372	0.572727	8	hsa-let-7b-5p/hsa-let-7e-5p/hsa-let-7f-5p	hsa-miR-128-3p/hsa-miR-128-3p/hsa-miR-216a-3p	hsa-miR-146a-5p	hsa-miR-21-5p	hsa-miR-27b-3p	hsa-miR-302b-3p/hsa-miR-520a-3p	hsa-miR-371a-5p	hsa-miR-381-3p
TRAPPC8	0.0579355	0.592372	0.572727	8	hsa-miR-128-3p/hsa-miR-128-3p/hsa-miR-216a-3p	hsa-miR-135a-5p	hsa-miR-141-3p/hsa-miR-200a-3p	hsa-miR-186-5p/hsa-miR-186-5p	hsa-miR-21-5p	hsa-miR-27b-3p	hsa-miR-374a-5p	hsa-miR-429
RGS17	0.0586344	0.592372	0.671329	13	hsa-let-7b-5p/hsa-let-7e-5p/hsa-let-7f-5p	hsa-miR-128-3p/hsa-miR-128-3p/hsa-miR-216a-3p	hsa-miR-141-3p/hsa-miR-200a-3p	hsa-miR-142-5p	hsa-miR-26a-5p	hsa-miR-27b-3p	hsa-miR-302b-3p/hsa-miR-520a-3p	hsa-miR-30b-5p/hsa-miR-30c-5p/hsa-miR-30d-5p	hsa-miR-34a-5p/hsa-miR-34c-5p/hsa-miR-449a/hsa-miR-449b-5p	hsa-miR-381-3p	hsa-miR-425-5p	hsa-miR-448	hsa-miR-92a-3p/hsa-miR-92b-3p
BCL7A	0.0634103	0.592372	0.606061	9	hsa-let-7b-5p/hsa-let-7e-5p/hsa-let-7f-5p	hsa-miR-204-5p	hsa-miR-21-5p	hsa-miR-27b-3p	hsa-miR-29a-3p/hsa-miR-29b-3p	hsa-miR-302b-3p/hsa-miR-520a-3p	hsa-miR-362-3p	hsa-miR-424-5p	hsa-miR-501-3p
CECR2	0.0634103	0.592372	0.606061	9	hsa-let-7b-5p/hsa-let-7e-5p/hsa-let-7f-5p	hsa-miR-125a-5p/hsa-miR-125b-5p	hsa-miR-128-3p/hsa-miR-128-3p/hsa-miR-216a-3p	hsa-miR-27b-3p	hsa-miR-302b-3p/hsa-miR-520a-3p	hsa-miR-30b-5p/hsa-miR-30c-5p/hsa-miR-30d-5p	hsa-miR-381-3p	hsa-miR-429	hsa-miR-9-5p
CHRM3	0.0634103	0.592372	0.606061	9	hsa-miR-140-5p	hsa-miR-186-5p/hsa-miR-186-5p	hsa-miR-302b-3p/hsa-miR-520a-3p	hsa-miR-30b-5p/hsa-miR-30c-5p/hsa-miR-30d-5p	hsa-miR-362-3p	hsa-miR-362-5p	hsa-miR-423-5p	hsa-miR-424-5p	hsa-miR-9-5p
PDE7B	0.0634103	0.592372	0.606061	9	hsa-miR-128-3p/hsa-miR-128-3p/hsa-miR-216a-3p	hsa-miR-135a-5p	hsa-miR-138-5p	hsa-miR-27b-3p	hsa-miR-34a-5p/hsa-miR-34c-5p/hsa-miR-449a/hsa-miR-449b-5p	hsa-miR-374a-5p	hsa-miR-381-3p	hsa-miR-429	hsa-miR-9-5p
PTGFRN	0.0634103	0.592372	0.606061	9	hsa-miR-128-3p/hsa-miR-128-3p/hsa-miR-216a-3p	hsa-miR-138-5p	hsa-miR-146a-5p	hsa-miR-204-5p	hsa-miR-27b-3p	hsa-miR-30b-5p/hsa-miR-30c-5p/hsa-miR-30d-5p	hsa-miR-448	hsa-miR-455-5p	hsa-miR-9-5p
PTPRJ	0.0634103	0.592372	0.606061	9	hsa-miR-155-5p	hsa-miR-204-5p	hsa-miR-205-5p	hsa-miR-27b-3p	hsa-miR-362-3p	hsa-miR-424-5p	hsa-miR-455-5p	hsa-miR-92a-3p/hsa-miR-92b-3p	hsa-miR-9-5p
SYT1	0.0634103	0.592372	0.606061	9	hsa-let-7b-5p/hsa-let-7e-5p/hsa-let-7f-5p	hsa-miR-128-3p/hsa-miR-128-3p/hsa-miR-216a-3p	hsa-miR-135a-5p	hsa-miR-146a-5p	hsa-miR-27b-3p	hsa-miR-34a-5p/hsa-miR-34c-5p/hsa-miR-449a/hsa-miR-449b-5p	hsa-miR-429	hsa-miR-92a-3p/hsa-miR-92b-3p	hsa-miR-9-5p
TMCC1	0.0634103	0.592372	0.606061	9	hsa-miR-128-3p/hsa-miR-128-3p/hsa-miR-216a-3p	hsa-miR-26a-5p	hsa-miR-27b-3p	hsa-miR-302b-3p/hsa-miR-520a-3p	hsa-miR-30b-5p/hsa-miR-30c-5p/hsa-miR-30d-5p	hsa-miR-424-5p	hsa-miR-429	hsa-miR-92a-3p/hsa-miR-92b-3p	hsa-miR-9-5p
UBE2R2	0.0634103	0.592372	0.606061	9	hsa-miR-125a-5p/hsa-miR-125b-5p	hsa-miR-138-5p	hsa-miR-186-5p/hsa-miR-186-5p	hsa-miR-204-5p	hsa-miR-302b-3p/hsa-miR-520a-3p	hsa-miR-30b-5p/hsa-miR-30c-5p/hsa-miR-30d-5p	hsa-miR-423-5p	hsa-miR-429	hsa-miR-501-3p
ACSBG1	0.0650263	0.592372	0.48	5	hsa-miR-186-5p/hsa-miR-186-5p	hsa-miR-27b-3p	hsa-miR-302b-3p/hsa-miR-520a-3p	hsa-miR-30b-5p/hsa-miR-30c-5p/hsa-miR-30d-5p	hsa-miR-424-5p
ADAM11	0.0650263	0.592372	0.48	5	hsa-miR-125a-5p/hsa-miR-125b-5p	hsa-miR-30b-5p/hsa-miR-30c-5p/hsa-miR-30d-5p	hsa-miR-34a-5p/hsa-miR-34c-5p/hsa-miR-449a/hsa-miR-449b-5p	hsa-miR-7-5p	hsa-miR-9-5p
ALPK3	0.0650263	0.592372	0.48	5	hsa-let-7b-5p/hsa-let-7e-5p/hsa-let-7f-5p	hsa-miR-125a-5p/hsa-miR-125b-5p	hsa-miR-30b-5p/hsa-miR-30c-5p/hsa-miR-30d-5p	hsa-miR-422a	hsa-miR-92a-3p/hsa-miR-92b-3p
AMOTL1	0.0650263	0.592372	0.48	5	hsa-miR-141-3p/hsa-miR-200a-3p	hsa-miR-30b-5p/hsa-miR-30c-5p/hsa-miR-30d-5p	hsa-miR-424-5p	hsa-miR-501-3p	hsa-miR-9-5p
ANKRD13B	0.0650263	0.592372	0.48	5	hsa-miR-125a-5p/hsa-miR-125b-5p	hsa-miR-138-5p	hsa-miR-29a-3p/hsa-miR-29b-3p	hsa-miR-302b-3p/hsa-miR-520a-3p	hsa-miR-424-5p
ANP32E	0.0650263	0.592372	0.48	5	hsa-miR-135a-5p	hsa-miR-141-3p/hsa-miR-200a-3p	hsa-miR-384	hsa-miR-501-3p	hsa-miR-92a-3p/hsa-miR-92b-3p
ATF6	0.0650263	0.592372	0.48	5	hsa-miR-140-5p	hsa-miR-141-3p/hsa-miR-200a-3p	hsa-miR-142-5p	hsa-miR-384	hsa-miR-424-5p
BSDC1	0.0650263	0.592372	0.48	5	hsa-miR-155-5p	hsa-miR-29a-3p/hsa-miR-29b-3p	hsa-miR-374a-5p	hsa-miR-424-5p	hsa-miR-92a-3p/hsa-miR-92b-3p
C10orf11	0.0650263	0.592372	0.48	5	hsa-miR-142-5p	hsa-miR-204-5p	hsa-miR-216b-5p	hsa-miR-302b-3p/hsa-miR-520a-3p	hsa-miR-30b-5p/hsa-miR-30c-5p/hsa-miR-30d-5p
C4orf32	0.0650263	0.592372	0.48	5	hsa-miR-186-5p/hsa-miR-186-5p	hsa-miR-216a-5p	hsa-miR-29a-3p/hsa-miR-29b-3p	hsa-miR-381-3p	hsa-miR-429
CA7	0.0650263	0.592372	0.48	5	hsa-miR-128-3p/hsa-miR-128-3p/hsa-miR-216a-3p	hsa-miR-27b-3p	hsa-miR-34a-5p/hsa-miR-34c-5p/hsa-miR-449a/hsa-miR-449b-5p	hsa-miR-7-5p	hsa-miR-9-5p
CCAR2	0.0650263	0.592372	0.48	5	hsa-miR-138-5p	hsa-miR-26a-5p	hsa-miR-296-5p	hsa-miR-381-3p	hsa-miR-9-5p
CHD5	0.0650263	0.592372	0.48	5	hsa-miR-204-5p	hsa-miR-26a-5p	hsa-miR-30b-5p/hsa-miR-30c-5p/hsa-miR-30d-5p	hsa-miR-362-3p	hsa-miR-424-5p
CORO2A	0.0650263	0.592372	0.48	5	hsa-miR-125a-5p/hsa-miR-125b-5p	hsa-miR-140-5p	hsa-miR-216a-5p	hsa-miR-302b-3p/hsa-miR-520a-3p	hsa-miR-30b-5p/hsa-miR-30c-5p/hsa-miR-30d-5p
DYRK1B	0.0650263	0.592372	0.48	5	hsa-miR-135a-5p	hsa-miR-296-5p	hsa-miR-423-5p	hsa-miR-424-5p	hsa-miR-9-5p
FBRS	0.0650263	0.592372	0.48	5	hsa-miR-141-3p/hsa-miR-200a-3p	hsa-miR-296-5p	hsa-miR-29a-3p/hsa-miR-29b-3p	hsa-miR-423-5p	hsa-miR-9-5p
FCHO2	0.0650263	0.592372	0.48	5	hsa-miR-135a-5p	hsa-miR-140-5p	hsa-miR-142-5p	hsa-miR-21-5p	hsa-miR-92a-3p/hsa-miR-92b-3p
FGD6	0.0650263	0.592372	0.48	5	hsa-let-7b-5p/hsa-let-7e-5p/hsa-let-7f-5p	hsa-miR-128-3p/hsa-miR-128-3p/hsa-miR-216a-3p	hsa-miR-27b-3p	hsa-miR-30b-5p/hsa-miR-30c-5p/hsa-miR-30d-5p	hsa-miR-34a-5p/hsa-miR-34c-5p/hsa-miR-449a/hsa-miR-449b-5p
FREM2	0.0650263	0.592372	0.48	5	hsa-let-7b-5p/hsa-let-7e-5p/hsa-let-7f-5p	hsa-miR-29a-3p/hsa-miR-29b-3p	hsa-miR-429	hsa-miR-92a-3p/hsa-miR-92b-3p	hsa-miR-9-5p
HMGA1	0.0650263	0.592372	0.48	5	hsa-let-7b-5p/hsa-let-7e-5p/hsa-let-7f-5p	hsa-miR-138-5p	hsa-miR-26a-5p	hsa-miR-296-5p	hsa-miR-424-5p
HNRNPUL1	0.0650263	0.592372	0.48	5	hsa-miR-138-5p	hsa-miR-26a-5p	hsa-miR-29a-3p/hsa-miR-29b-3p	hsa-miR-302b-3p/hsa-miR-520a-3p	hsa-miR-423-5p
HS3ST3A1	0.0650263	0.592372	0.48	5	hsa-miR-142-5p	hsa-miR-155-5p	hsa-miR-26a-5p	hsa-miR-429	hsa-miR-448
ITGA5	0.0650263	0.592372	0.48	5	hsa-miR-128-3p/hsa-miR-128-3p/hsa-miR-216a-3p	hsa-miR-205-5p	hsa-miR-26a-5p	hsa-miR-27b-3p	hsa-miR-92a-3p/hsa-miR-92b-3p
LDLRAD3	0.0650263	0.592372	0.48	5	hsa-miR-128-3p/hsa-miR-128-3p/hsa-miR-216a-3p	hsa-miR-205-5p	hsa-miR-29a-3p/hsa-miR-29b-3p	hsa-miR-384	hsa-miR-9-5p
LEF1	0.0650263	0.592372	0.48	5	hsa-miR-26a-5p	hsa-miR-302b-3p/hsa-miR-520a-3p	hsa-miR-34a-5p/hsa-miR-34c-5p/hsa-miR-449a/hsa-miR-449b-5p	hsa-miR-371a-5p	hsa-miR-381-3p
LGR4	0.0650263	0.592372	0.48	5	hsa-let-7b-5p/hsa-let-7e-5p/hsa-let-7f-5p	hsa-miR-204-5p	hsa-miR-27b-3p	hsa-miR-302b-3p/hsa-miR-520a-3p	hsa-miR-34a-5p/hsa-miR-34c-5p/hsa-miR-449a/hsa-miR-449b-5p
LZTS3	0.0650263	0.592372	0.48	5	hsa-miR-128-3p/hsa-miR-128-3p/hsa-miR-216a-3p	hsa-miR-138-5p	hsa-miR-27b-3p	hsa-miR-34a-5p/hsa-miR-34c-5p/hsa-miR-449a/hsa-miR-449b-5p	hsa-miR-9-5p
MDN1	0.0650263	0.592372	0.48	5	hsa-miR-128-3p/hsa-miR-128-3p/hsa-miR-216a-3p	hsa-miR-26a-5p	hsa-miR-27b-3p	hsa-miR-424-5p	hsa-miR-448
MPPED2	0.0650263	0.592372	0.48	5	hsa-miR-128-3p/hsa-miR-128-3p/hsa-miR-216a-3p	hsa-miR-141-3p/hsa-miR-200a-3p	hsa-miR-142-5p	hsa-miR-34a-5p/hsa-miR-34c-5p/hsa-miR-449a/hsa-miR-449b-5p	hsa-miR-448
MRAS	0.0650263	0.592372	0.48	5	hsa-miR-135a-5p	hsa-miR-138-5p	hsa-miR-26a-5p	hsa-miR-34a-5p/hsa-miR-34c-5p/hsa-miR-449a/hsa-miR-449b-5p	hsa-miR-424-5p
NECAP1	0.0650263	0.592372	0.48	5	hsa-miR-205-5p	hsa-miR-27b-3p	hsa-miR-302b-3p/hsa-miR-520a-3p	hsa-miR-30b-5p/hsa-miR-30c-5p/hsa-miR-30d-5p	hsa-miR-92a-3p/hsa-miR-92b-3p
NUP35	0.0650263	0.592372	0.48	5	hsa-miR-186-5p/hsa-miR-186-5p	hsa-miR-205-5p	hsa-miR-362-5p	hsa-miR-381-3p	hsa-miR-429
PAQR5	0.0650263	0.592372	0.48	5	hsa-miR-141-3p/hsa-miR-200a-3p	hsa-miR-205-5p	hsa-miR-30b-5p/hsa-miR-30c-5p/hsa-miR-30d-5p	hsa-miR-429	hsa-miR-9-5p
PITX2	0.0650263	0.592372	0.48	5	hsa-miR-140-5p	hsa-miR-141-3p/hsa-miR-200a-3p	hsa-miR-21-5p	hsa-miR-374a-5p	hsa-miR-494-3p
PLAA	0.0650263	0.592372	0.48	5	hsa-miR-128-3p/hsa-miR-128-3p/hsa-miR-216a-3p	hsa-miR-204-5p	hsa-miR-216a-5p	hsa-miR-27b-3p	hsa-miR-362-3p
RGL1	0.0650263	0.592372	0.48	5	hsa-miR-135a-5p	hsa-miR-302b-3p/hsa-miR-520a-3p	hsa-miR-30b-5p/hsa-miR-30c-5p/hsa-miR-30d-5p	hsa-miR-429	hsa-miR-92a-3p/hsa-miR-92b-3p
SEL1L3	0.0650263	0.592372	0.48	5	hsa-miR-142-5p	hsa-miR-30b-5p/hsa-miR-30c-5p/hsa-miR-30d-5p	hsa-miR-424-5p	hsa-miR-448	hsa-miR-92a-3p/hsa-miR-92b-3p
SLC17A7	0.0650263	0.592372	0.48	5	hsa-miR-125a-5p/hsa-miR-125b-5p	hsa-miR-138-5p	hsa-miR-142-5p	hsa-miR-204-5p	hsa-miR-362-5p
SMARCAD1	0.0650263	0.592372	0.48	5	hsa-let-7b-5p/hsa-let-7e-5p/hsa-let-7f-5p	hsa-miR-155-5p	hsa-miR-362-3p	hsa-miR-374a-5p	hsa-miR-429
SNX16	0.0650263	0.592372	0.48	5	hsa-let-7b-5p/hsa-let-7e-5p/hsa-let-7f-5p	hsa-miR-135a-5p	hsa-miR-142-5p	hsa-miR-30b-5p/hsa-miR-30c-5p/hsa-miR-30d-5p	hsa-miR-424-5p
SPRY2	0.0650263	0.592372	0.48	5	hsa-miR-128-3p/hsa-miR-128-3p/hsa-miR-216a-3p	hsa-miR-21-5p	hsa-miR-27b-3p	hsa-miR-374a-5p	hsa-miR-448
SUN1	0.0650263	0.592372	0.48	5	hsa-miR-125a-5p/hsa-miR-125b-5p	hsa-miR-142-5p	hsa-miR-29a-3p/hsa-miR-29b-3p	hsa-miR-494-3p	hsa-miR-92a-3p/hsa-miR-92b-3p
TRIP4	0.0650263	0.592372	0.48	5	hsa-miR-128-3p/hsa-miR-128-3p/hsa-miR-216a-3p	hsa-miR-186-5p/hsa-miR-186-5p	hsa-miR-216a-5p	hsa-miR-27b-3p	hsa-miR-371a-5p
UNC5B	0.0650263	0.592372	0.48	5	hsa-miR-151a-3p	hsa-miR-204-5p	hsa-miR-384	hsa-miR-424-5p	hsa-miR-455-5p
UVRAG	0.0650263	0.592372	0.48	5	hsa-miR-125a-5p/hsa-miR-125b-5p	hsa-miR-216b-5p	hsa-miR-302b-3p/hsa-miR-520a-3p	hsa-miR-371a-5p	hsa-miR-92a-3p/hsa-miR-92b-3p
WIPF1	0.0650263	0.592372	0.48	5	hsa-miR-135a-5p	hsa-miR-141-3p/hsa-miR-200a-3p	hsa-miR-30b-5p/hsa-miR-30c-5p/hsa-miR-30d-5p	hsa-miR-429	hsa-miR-9-5p
XPO5	0.0650263	0.592372	0.48	5	hsa-miR-204-5p	hsa-miR-29a-3p/hsa-miR-29b-3p	hsa-miR-34a-5p/hsa-miR-34c-5p/hsa-miR-449a/hsa-miR-449b-5p	hsa-miR-422a	hsa-miR-455-5p
ZFC3H1	0.0650263	0.592372	0.48	5	hsa-miR-216a-5p	hsa-miR-216b-5p	hsa-miR-26a-5p	hsa-miR-30b-5p/hsa-miR-30c-5p/hsa-miR-30d-5p	hsa-miR-92a-3p/hsa-miR-92b-3p
ZBTB20	0.0667255	0.592372	0.818182	28	hsa-miR-128-3p/hsa-miR-128-3p/hsa-miR-216a-3p	hsa-miR-138-5p	hsa-miR-140-5p	hsa-miR-141-3p/hsa-miR-200a-3p	hsa-miR-142-5p	hsa-miR-186-5p/hsa-miR-186-5p	hsa-miR-204-5p	hsa-miR-205-5p	hsa-miR-26a-5p	hsa-miR-27b-3p	hsa-miR-296-3p	hsa-miR-29a-3p/hsa-miR-29b-3p	hsa-miR-302b-3p/hsa-miR-520a-3p	hsa-miR-30b-5p/hsa-miR-30c-5p/hsa-miR-30d-5p	hsa-miR-34a-5p/hsa-miR-34c-5p/hsa-miR-449a/hsa-miR-449b-5p	hsa-miR-362-3p	hsa-miR-362-5p	hsa-miR-374a-5p	hsa-miR-381-3p	hsa-miR-422a	hsa-miR-424-5p	hsa-miR-429	hsa-miR-448	hsa-miR-494-3p	hsa-miR-501-3p	hsa-miR-7-5p	hsa-miR-92a-3p/hsa-miR-92b-3p	hsa-miR-9-5p
ELOVL6	0.06714	0.592372	0.632727	10	hsa-miR-125a-5p/hsa-miR-125b-5p	hsa-miR-128-3p/hsa-miR-128-3p/hsa-miR-216a-3p	hsa-miR-135a-5p	hsa-miR-186-5p/hsa-miR-186-5p	hsa-miR-204-5p	hsa-miR-302b-3p/hsa-miR-520a-3p	hsa-miR-30b-5p/hsa-miR-30c-5p/hsa-miR-30d-5p	hsa-miR-371a-5p	hsa-miR-424-5p	hsa-miR-92a-3p/hsa-miR-92b-3p
FAM46C	0.06714	0.592372	0.632727	10	hsa-miR-141-3p/hsa-miR-200a-3p	hsa-miR-26a-5p	hsa-miR-296-3p	hsa-miR-302b-3p/hsa-miR-520a-3p	hsa-miR-30b-5p/hsa-miR-30c-5p/hsa-miR-30d-5p	hsa-miR-371a-5p	hsa-miR-384	hsa-miR-429	hsa-miR-7-5p	hsa-miR-9-5p
PHLPP2	0.06714	0.592372	0.632727	10	hsa-miR-128-3p/hsa-miR-128-3p/hsa-miR-216a-3p	hsa-miR-135a-5p	hsa-miR-141-3p/hsa-miR-200a-3p	hsa-miR-204-5p	hsa-miR-27b-3p	hsa-miR-29a-3p/hsa-miR-29b-3p	hsa-miR-302b-3p/hsa-miR-520a-3p	hsa-miR-371a-5p	hsa-miR-424-5p	hsa-miR-92a-3p/hsa-miR-92b-3p
RAD51L3-RFFL	0.06714	0.592372	0.632727	10	hsa-miR-125a-5p/hsa-miR-125b-5p	hsa-miR-140-5p	hsa-miR-142-5p	hsa-miR-21-5p	hsa-miR-216a-5p	hsa-miR-30b-5p/hsa-miR-30c-5p/hsa-miR-30d-5p	hsa-miR-381-3p	hsa-miR-423-5p	hsa-miR-424-5p	hsa-miR-448
RFFL	0.06714	0.592372	0.632727	10	hsa-miR-125a-5p/hsa-miR-125b-5p	hsa-miR-140-5p	hsa-miR-142-5p	hsa-miR-21-5p	hsa-miR-216a-5p	hsa-miR-30b-5p/hsa-miR-30c-5p/hsa-miR-30d-5p	hsa-miR-381-3p	hsa-miR-423-5p	hsa-miR-424-5p	hsa-miR-448
RNF24	0.06714	0.592372	0.632727	10	hsa-miR-135a-5p	hsa-miR-138-5p	hsa-miR-204-5p	hsa-miR-21-5p	hsa-miR-362-3p	hsa-miR-381-3p	hsa-miR-424-5p	hsa-miR-429	hsa-miR-7-5p	hsa-miR-9-5p
SATB2	0.06714	0.592372	0.632727	10	hsa-miR-125a-5p/hsa-miR-125b-5p	hsa-miR-128-3p/hsa-miR-128-3p/hsa-miR-216a-3p	hsa-miR-140-5p	hsa-miR-155-5p	hsa-miR-204-5p	hsa-miR-205-5p	hsa-miR-27b-3p	hsa-miR-30b-5p/hsa-miR-30c-5p/hsa-miR-30d-5p	hsa-miR-34a-5p/hsa-miR-34c-5p/hsa-miR-449a/hsa-miR-449b-5p	hsa-miR-92a-3p/hsa-miR-92b-3p
ALX4	0.0683092	0.592372	0.561039	7	hsa-miR-142-5p	hsa-miR-205-5p	hsa-miR-21-5p	hsa-miR-26a-5p	hsa-miR-302b-3p/hsa-miR-520a-3p	hsa-miR-424-5p	hsa-miR-92a-3p/hsa-miR-92b-3p
ANK2	0.0683092	0.592372	0.561039	7	hsa-miR-128-3p/hsa-miR-128-3p/hsa-miR-216a-3p	hsa-miR-141-3p/hsa-miR-200a-3p	hsa-miR-205-5p	hsa-miR-26a-5p	hsa-miR-27b-3p	hsa-miR-34a-5p/hsa-miR-34c-5p/hsa-miR-449a/hsa-miR-449b-5p	hsa-miR-9-5p
ANKRD33B	0.0683092	0.592372	0.561039	7	hsa-let-7b-5p/hsa-let-7e-5p/hsa-let-7f-5p	hsa-miR-125a-5p/hsa-miR-125b-5p	hsa-miR-142-5p	hsa-miR-21-5p	hsa-miR-302b-3p/hsa-miR-520a-3p	hsa-miR-424-5p	hsa-miR-448
ATL3	0.0683092	0.592372	0.561039	7	hsa-miR-128-3p/hsa-miR-128-3p/hsa-miR-216a-3p	hsa-miR-142-5p	hsa-miR-216a-5p	hsa-miR-26a-5p	hsa-miR-27b-3p	hsa-miR-494-3p	hsa-miR-92a-3p/hsa-miR-92b-3p
C11orf57	0.0683092	0.592372	0.561039	7	hsa-let-7b-5p/hsa-let-7e-5p/hsa-let-7f-5p	hsa-miR-125a-5p/hsa-miR-125b-5p	hsa-miR-138-5p	hsa-miR-205-5p	hsa-miR-216a-5p	hsa-miR-216b-5p	hsa-miR-29a-3p/hsa-miR-29b-3p
CASZ1	0.0683092	0.592372	0.561039	7	hsa-miR-135a-5p	hsa-miR-151a-5p/hsa-miR-151b	hsa-miR-26a-5p	hsa-miR-362-3p	hsa-miR-371a-5p	hsa-miR-429	hsa-miR-455-5p
CBFA2T3	0.0683092	0.592372	0.561039	7	hsa-let-7b-5p/hsa-let-7e-5p/hsa-let-7f-5p	hsa-miR-128-3p/hsa-miR-128-3p/hsa-miR-216a-3p	hsa-miR-204-5p	hsa-miR-27b-3p	hsa-miR-34a-5p/hsa-miR-34c-5p/hsa-miR-449a/hsa-miR-449b-5p	hsa-miR-424-5p	hsa-miR-92a-3p/hsa-miR-92b-3p
CYTH3	0.0683092	0.592372	0.561039	7	hsa-let-7b-5p/hsa-let-7e-5p/hsa-let-7f-5p	hsa-miR-29a-3p/hsa-miR-29b-3p	hsa-miR-374a-5p	hsa-miR-429	hsa-miR-448	hsa-miR-7-5p	hsa-miR-9-5p
DCLK1	0.0683092	0.592372	0.561039	7	hsa-miR-135a-5p	hsa-miR-216b-5p	hsa-miR-26a-5p	hsa-miR-374a-5p	hsa-miR-448	hsa-miR-494-3p	hsa-miR-501-3p
DVL3	0.0683092	0.592372	0.561039	7	hsa-let-7b-5p/hsa-let-7e-5p/hsa-let-7f-5p	hsa-miR-125a-5p/hsa-miR-125b-5p	hsa-miR-204-5p	hsa-miR-296-3p	hsa-miR-362-5p	hsa-miR-423-5p	hsa-miR-448
GATAD2A	0.0683092	0.592372	0.561039	7	hsa-miR-128-3p/hsa-miR-128-3p/hsa-miR-216a-3p	hsa-miR-138-5p	hsa-miR-27b-3p	hsa-miR-362-3p	hsa-miR-381-3p	hsa-miR-424-5p	hsa-miR-448
IGLON5	0.0683092	0.592372	0.561039	7	hsa-let-7b-5p/hsa-let-7e-5p/hsa-let-7f-5p	hsa-miR-128-3p/hsa-miR-128-3p/hsa-miR-216a-3p	hsa-miR-138-5p	hsa-miR-27b-3p	hsa-miR-296-5p	hsa-miR-448	hsa-miR-7-5p
KBTBD8	0.0683092	0.592372	0.561039	7	hsa-miR-100-5p	hsa-miR-128-3p/hsa-miR-128-3p/hsa-miR-216a-3p	hsa-miR-26a-5p	hsa-miR-27b-3p	hsa-miR-29a-3p/hsa-miR-29b-3p	hsa-miR-429	hsa-miR-92a-3p/hsa-miR-92b-3p
KIF21B	0.0683092	0.592372	0.561039	7	hsa-let-7b-5p/hsa-let-7e-5p/hsa-let-7f-5p	hsa-miR-138-5p	hsa-miR-216a-5p	hsa-miR-26a-5p	hsa-miR-27b-3p	hsa-miR-30b-5p/hsa-miR-30c-5p/hsa-miR-30d-5p	hsa-miR-425-5p
KIF3B	0.0683092	0.592372	0.561039	7	hsa-miR-135a-5p	hsa-miR-29a-3p/hsa-miR-29b-3p	hsa-miR-302b-3p/hsa-miR-520a-3p	hsa-miR-371a-5p	hsa-miR-384	hsa-miR-424-5p	hsa-miR-92a-3p/hsa-miR-92b-3p
MCL1	0.0683092	0.592372	0.561039	7	hsa-miR-125a-5p/hsa-miR-125b-5p	hsa-miR-135a-5p	hsa-miR-142-5p	hsa-miR-26a-5p	hsa-miR-29a-3p/hsa-miR-29b-3p	hsa-miR-302b-3p/hsa-miR-520a-3p	hsa-miR-381-3p
NEK9	0.0683092	0.592372	0.561039	7	hsa-let-7b-5p/hsa-let-7e-5p/hsa-let-7f-5p	hsa-miR-135a-5p	hsa-miR-302b-3p/hsa-miR-520a-3p	hsa-miR-34a-5p/hsa-miR-34c-5p/hsa-miR-449a/hsa-miR-449b-5p	hsa-miR-424-5p	hsa-miR-429	hsa-miR-448
NFATC3	0.0683092	0.592372	0.561039	7	hsa-miR-142-5p	hsa-miR-204-5p	hsa-miR-29a-3p/hsa-miR-29b-3p	hsa-miR-30b-5p/hsa-miR-30c-5p/hsa-miR-30d-5p	hsa-miR-424-5p	hsa-miR-448	hsa-miR-9-5p
PAK2	0.0683092	0.592372	0.561039	7	hsa-miR-216a-5p	hsa-miR-26a-5p	hsa-miR-302b-3p/hsa-miR-520a-3p	hsa-miR-424-5p	hsa-miR-425-5p	hsa-miR-7-5p	hsa-miR-9-5p
PDHB	0.0683092	0.592372	0.561039	7	hsa-let-7b-5p/hsa-let-7e-5p/hsa-let-7f-5p	hsa-miR-141-3p/hsa-miR-200a-3p	hsa-miR-146a-5p	hsa-miR-26a-5p	hsa-miR-362-3p	hsa-miR-424-5p	hsa-miR-92a-3p/hsa-miR-92b-3p
PLEKHA6	0.0683092	0.592372	0.561039	7	hsa-miR-27b-3p	hsa-miR-381-3p	hsa-miR-429	hsa-miR-448	hsa-miR-455-5p	hsa-miR-92a-3p/hsa-miR-92b-3p	hsa-miR-9-5p
RNF111	0.0683092	0.592372	0.561039	7	hsa-miR-155-5p	hsa-miR-21-5p	hsa-miR-27b-3p	hsa-miR-381-3p	hsa-miR-424-5p	hsa-miR-455-5p	hsa-miR-9-5p
SHANK3	0.0683092	0.592372	0.561039	7	hsa-miR-27b-3p	hsa-miR-34a-5p/hsa-miR-34c-5p/hsa-miR-449a/hsa-miR-449b-5p	hsa-miR-374a-5p	hsa-miR-422a	hsa-miR-423-5p	hsa-miR-494-3p	hsa-miR-7-5p
SOCS4	0.0683092	0.592372	0.561039	7	hsa-let-7b-5p/hsa-let-7e-5p/hsa-let-7f-5p	hsa-miR-125a-5p/hsa-miR-125b-5p	hsa-miR-135a-5p	hsa-miR-27b-3p	hsa-miR-34a-5p/hsa-miR-34c-5p/hsa-miR-449a/hsa-miR-449b-5p	hsa-miR-374a-5p	hsa-miR-9-5p
TBC1D30	0.0683092	0.592372	0.561039	7	hsa-miR-135a-5p	hsa-miR-26a-5p	hsa-miR-302b-3p/hsa-miR-520a-3p	hsa-miR-34a-5p/hsa-miR-34c-5p/hsa-miR-449a/hsa-miR-449b-5p	hsa-miR-448	hsa-miR-7-5p	hsa-miR-92a-3p/hsa-miR-92b-3p
TOB2	0.0683092	0.592372	0.561039	7	hsa-let-7b-5p/hsa-let-7e-5p/hsa-let-7f-5p	hsa-miR-205-5p	hsa-miR-216b-5p	hsa-miR-34a-5p/hsa-miR-34c-5p/hsa-miR-449a/hsa-miR-449b-5p	hsa-miR-362-3p	hsa-miR-422a	hsa-miR-92a-3p/hsa-miR-92b-3p
UNC80	0.0683092	0.592372	0.561039	7	hsa-miR-128-3p/hsa-miR-128-3p/hsa-miR-216a-3p	hsa-miR-21-5p	hsa-miR-27b-3p	hsa-miR-302b-3p/hsa-miR-520a-3p	hsa-miR-424-5p	hsa-miR-501-3p	hsa-miR-9-5p
ZC3H7B	0.0683092	0.592372	0.561039	7	hsa-miR-125a-5p/hsa-miR-125b-5p	hsa-miR-138-5p	hsa-miR-26a-5p	hsa-miR-28-3p	hsa-miR-296-5p	hsa-miR-362-3p	hsa-miR-374a-5p
ZCCHC11	0.0683092	0.592372	0.561039	7	hsa-let-7b-5p/hsa-let-7e-5p/hsa-let-7f-5p	hsa-miR-142-5p	hsa-miR-186-5p/hsa-miR-186-5p	hsa-miR-204-5p	hsa-miR-26a-5p	hsa-miR-381-3p	hsa-miR-384
ACVR1C	0.06951	0.592372	0.654545	11	hsa-let-7b-5p/hsa-let-7e-5p/hsa-let-7f-5p	hsa-miR-125a-5p/hsa-miR-125b-5p	hsa-miR-128-3p/hsa-miR-128-3p/hsa-miR-216a-3p	hsa-miR-21-5p	hsa-miR-26a-5p	hsa-miR-27b-3p	hsa-miR-302b-3p/hsa-miR-520a-3p	hsa-miR-429	hsa-miR-448	hsa-miR-494-3p	hsa-miR-9-5p
NSD1	0.06951	0.592372	0.654545	11	hsa-let-7b-5p/hsa-let-7e-5p/hsa-let-7f-5p	hsa-miR-128-3p/hsa-miR-128-3p/hsa-miR-216a-3p	hsa-miR-146a-5p	hsa-miR-186-5p/hsa-miR-186-5p	hsa-miR-27b-3p	hsa-miR-296-5p	hsa-miR-29a-3p/hsa-miR-29b-3p	hsa-miR-30b-5p/hsa-miR-30c-5p/hsa-miR-30d-5p	hsa-miR-34a-5p/hsa-miR-34c-5p/hsa-miR-449a/hsa-miR-449b-5p	hsa-miR-381-3p	hsa-miR-494-3p
PIK3CA	0.06951	0.592372	0.654545	11	hsa-let-7b-5p/hsa-let-7e-5p/hsa-let-7f-5p	hsa-miR-128-3p/hsa-miR-128-3p/hsa-miR-216a-3p	hsa-miR-142-5p	hsa-miR-155-5p	hsa-miR-186-5p/hsa-miR-186-5p	hsa-miR-27b-3p	hsa-miR-29a-3p/hsa-miR-29b-3p	hsa-miR-374a-5p	hsa-miR-384	hsa-miR-429	hsa-miR-92a-3p/hsa-miR-92b-3p
SOCS5	0.0701845	0.592372	0.712727	15	hsa-miR-128-3p/hsa-miR-128-3p/hsa-miR-216a-3p	hsa-miR-138-5p	hsa-miR-141-3p/hsa-miR-200a-3p	hsa-miR-151a-3p	hsa-miR-155-5p	hsa-miR-216a-5p	hsa-miR-26a-5p	hsa-miR-302b-3p/hsa-miR-520a-3p	hsa-miR-371a-5p	hsa-miR-381-3p	hsa-miR-424-5p	hsa-miR-448	hsa-miR-494-3p	hsa-miR-92a-3p/hsa-miR-92b-3p	hsa-miR-9-5p
ABHD6	0.0705741	0.592372	0.363636	3	hsa-miR-125a-5p/hsa-miR-125b-5p	hsa-miR-27b-3p	hsa-miR-30b-5p/hsa-miR-30c-5p/hsa-miR-30d-5p
ADAMTS14	0.0705741	0.592372	0.363636	3	hsa-let-7b-5p/hsa-let-7e-5p/hsa-let-7f-5p	hsa-miR-125a-5p/hsa-miR-125b-5p	hsa-miR-30b-5p/hsa-miR-30c-5p/hsa-miR-30d-5p
ASPHD2	0.0705741	0.592372	0.363636	3	hsa-miR-34a-5p/hsa-miR-34c-5p/hsa-miR-449a/hsa-miR-449b-5p	hsa-miR-381-3p	hsa-miR-501-3p
BTBD1	0.0705741	0.592372	0.363636	3	hsa-miR-142-5p	hsa-miR-204-5p	hsa-miR-381-3p
CACNB1	0.0705741	0.592372	0.363636	3	hsa-miR-125a-5p/hsa-miR-125b-5p	hsa-miR-34a-5p/hsa-miR-34c-5p/hsa-miR-449a/hsa-miR-449b-5p	hsa-miR-424-5p
CACYBP	0.0705741	0.592372	0.363636	3	hsa-miR-128-3p/hsa-miR-128-3p/hsa-miR-216a-3p	hsa-miR-27b-3p	hsa-miR-494-3p
CDC23	0.0705741	0.592372	0.363636	3	hsa-miR-216b-5p	hsa-miR-302b-3p/hsa-miR-520a-3p	hsa-miR-424-5p
CHFR	0.0705741	0.592372	0.363636	3	hsa-miR-26a-5p	hsa-miR-29a-3p/hsa-miR-29b-3p	hsa-miR-30b-5p/hsa-miR-30c-5p/hsa-miR-30d-5p
CINP	0.0705741	0.592372	0.363636	3	hsa-miR-138-5p	hsa-miR-423-3p	hsa-miR-424-5p
CNTN5	0.0705741	0.592372	0.363636	3	hsa-miR-135a-5p	hsa-miR-186-5p/hsa-miR-186-5p	hsa-miR-448
COG8	0.0705741	0.592372	0.363636	3	hsa-miR-141-3p/hsa-miR-200a-3p	hsa-miR-146a-5p	hsa-miR-204-5p
CPA4	0.0705741	0.592372	0.363636	3	hsa-let-7b-5p/hsa-let-7e-5p/hsa-let-7f-5p	hsa-miR-362-3p	hsa-miR-455-5p
CUEDC1	0.0705741	0.592372	0.363636	3	hsa-miR-29a-3p/hsa-miR-29b-3p	hsa-miR-34a-5p/hsa-miR-34c-5p/hsa-miR-449a/hsa-miR-449b-5p	hsa-miR-422a
DLG1	0.0705741	0.592372	0.363636	3	hsa-miR-142-5p	hsa-miR-204-5p	hsa-miR-216b-5p
DRD1	0.0705741	0.592372	0.363636	3	hsa-miR-142-5p	hsa-miR-302b-3p/hsa-miR-520a-3p	hsa-miR-30b-5p/hsa-miR-30c-5p/hsa-miR-30d-5p
DRD2	0.0705741	0.592372	0.363636	3	hsa-miR-125a-5p/hsa-miR-125b-5p	hsa-miR-141-3p/hsa-miR-200a-3p	hsa-miR-9-5p
DSG3	0.0705741	0.592372	0.363636	3	hsa-let-7b-5p/hsa-let-7e-5p/hsa-let-7f-5p	hsa-miR-29a-3p/hsa-miR-29b-3p	hsa-miR-374a-5p
EPDR1	0.0705741	0.592372	0.363636	3	hsa-miR-100-5p	hsa-miR-30b-5p/hsa-miR-30c-5p/hsa-miR-30d-5p	hsa-miR-362-5p
ERCC6	0.0705741	0.592372	0.363636	3	hsa-let-7b-5p/hsa-let-7e-5p/hsa-let-7f-5p	hsa-miR-125a-5p/hsa-miR-125b-5p	hsa-miR-29a-3p/hsa-miR-29b-3p
ERRFI1	0.0705741	0.592372	0.363636	3	hsa-miR-205-5p	hsa-miR-30b-5p/hsa-miR-30c-5p/hsa-miR-30d-5p	hsa-miR-429
FAM83B	0.0705741	0.592372	0.363636	3	hsa-miR-186-5p/hsa-miR-186-5p	hsa-miR-7-5p	hsa-miR-9-5p
FECH	0.0705741	0.592372	0.363636	3	hsa-miR-140-5p	hsa-miR-186-5p/hsa-miR-186-5p	hsa-miR-374a-5p
GMNC	0.0705741	0.592372	0.363636	3	hsa-miR-26a-5p	hsa-miR-30b-5p/hsa-miR-30c-5p/hsa-miR-30d-5p	hsa-miR-34a-5p/hsa-miR-34c-5p/hsa-miR-449a/hsa-miR-449b-5p
GOLGA6A	0.0705741	0.592372	0.363636	3	hsa-miR-128-3p/hsa-miR-128-3p/hsa-miR-216a-3p	hsa-miR-27b-3p	hsa-miR-30b-5p/hsa-miR-30c-5p/hsa-miR-30d-5p
GOLGA6B	0.0705741	0.592372	0.363636	3	hsa-miR-128-3p/hsa-miR-128-3p/hsa-miR-216a-3p	hsa-miR-27b-3p	hsa-miR-30b-5p/hsa-miR-30c-5p/hsa-miR-30d-5p
GOLGA6C	0.0705741	0.592372	0.363636	3	hsa-miR-128-3p/hsa-miR-128-3p/hsa-miR-216a-3p	hsa-miR-27b-3p	hsa-miR-30b-5p/hsa-miR-30c-5p/hsa-miR-30d-5p
GOLGA6D	0.0705741	0.592372	0.363636	3	hsa-miR-128-3p/hsa-miR-128-3p/hsa-miR-216a-3p	hsa-miR-27b-3p	hsa-miR-30b-5p/hsa-miR-30c-5p/hsa-miR-30d-5p
GPR133	0.0705741	0.592372	0.363636	3	hsa-miR-128-3p/hsa-miR-128-3p/hsa-miR-216a-3p	hsa-miR-142-5p	hsa-miR-27b-3p
HMGN5	0.0705741	0.592372	0.363636	3	hsa-miR-140-5p	hsa-miR-142-5p	hsa-miR-186-5p/hsa-miR-186-5p
IFFO1	0.0705741	0.592372	0.363636	3	hsa-miR-125a-5p/hsa-miR-125b-5p	hsa-miR-29a-3p/hsa-miR-29b-3p	hsa-miR-302b-3p/hsa-miR-520a-3p
INPP4A	0.0705741	0.592372	0.363636	3	hsa-miR-204-5p	hsa-miR-30b-5p/hsa-miR-30c-5p/hsa-miR-30d-5p	hsa-miR-429
IRF4	0.0705741	0.592372	0.363636	3	hsa-miR-125a-5p/hsa-miR-125b-5p	hsa-miR-27b-3p	hsa-miR-30b-5p/hsa-miR-30c-5p/hsa-miR-30d-5p
ITGAV	0.0705741	0.592372	0.363636	3	hsa-miR-135a-5p	hsa-miR-142-5p	hsa-miR-92a-3p/hsa-miR-92b-3p
KDM1B	0.0705741	0.592372	0.363636	3	hsa-miR-135a-5p	hsa-miR-302b-3p/hsa-miR-520a-3p	hsa-miR-429
KIAA1328	0.0705741	0.592372	0.363636	3	hsa-miR-142-5p	hsa-miR-186-5p/hsa-miR-186-5p	hsa-miR-424-5p
LENG8	0.0705741	0.592372	0.363636	3	hsa-miR-138-5p	hsa-miR-141-3p/hsa-miR-200a-3p	hsa-miR-216b-5p
LMOD2	0.0705741	0.592372	0.363636	3	hsa-miR-216a-5p	hsa-miR-362-3p	hsa-miR-494-3p
LYPLA1	0.0705741	0.592372	0.363636	3	hsa-miR-135a-5p	hsa-miR-138-5p	hsa-miR-141-3p/hsa-miR-200a-3p
MDFI	0.0705741	0.592372	0.363636	3	hsa-let-7b-5p/hsa-let-7e-5p/hsa-let-7f-5p	hsa-miR-128-3p/hsa-miR-128-3p/hsa-miR-216a-3p	hsa-miR-27b-3p
MED6	0.0705741	0.592372	0.363636	3	hsa-let-7b-5p/hsa-let-7e-5p/hsa-let-7f-5p	hsa-miR-381-3p	hsa-miR-429
NASP	0.0705741	0.592372	0.363636	3	hsa-miR-186-5p/hsa-miR-186-5p	hsa-miR-29a-3p/hsa-miR-29b-3p	hsa-miR-381-3p
NCMAP	0.0705741	0.592372	0.363636	3	hsa-miR-135a-5p	hsa-miR-29a-3p/hsa-miR-29b-3p	hsa-miR-429
NGFRAP1	0.0705741	0.592372	0.363636	3	hsa-miR-128-3p/hsa-miR-128-3p/hsa-miR-216a-3p	hsa-miR-216a-5p	hsa-miR-27b-3p
NNT	0.0705741	0.592372	0.363636	3	hsa-let-7b-5p/hsa-let-7e-5p/hsa-let-7f-5p	hsa-miR-216a-5p	hsa-miR-494-3p
NR2F6	0.0705741	0.592372	0.363636	3	hsa-miR-128-3p/hsa-miR-128-3p/hsa-miR-216a-3p	hsa-miR-135a-5p	hsa-miR-27b-3p
NRBP1	0.0705741	0.592372	0.363636	3	hsa-miR-30b-5p/hsa-miR-30c-5p/hsa-miR-30d-5p	hsa-miR-424-5p	hsa-miR-429
OSBPL5	0.0705741	0.592372	0.363636	3	hsa-miR-302b-3p/hsa-miR-520a-3p	hsa-miR-7-5p	hsa-miR-92a-3p/hsa-miR-92b-3p
OSMR	0.0705741	0.592372	0.363636	3	hsa-let-7b-5p/hsa-let-7e-5p/hsa-let-7f-5p	hsa-miR-429	hsa-miR-448
PDK1	0.0705741	0.592372	0.363636	3	hsa-miR-128-3p/hsa-miR-128-3p/hsa-miR-216a-3p	hsa-miR-138-5p	hsa-miR-27b-3p
PFDN4	0.0705741	0.592372	0.363636	3	hsa-miR-26a-5p	hsa-miR-429	hsa-miR-494-3p
PHLDB2	0.0705741	0.592372	0.363636	3	hsa-miR-135a-5p	hsa-miR-26a-5p	hsa-miR-9-5p
PIGH	0.0705741	0.592372	0.363636	3	hsa-miR-135a-5p	hsa-miR-302b-3p/hsa-miR-520a-3p	hsa-miR-7-5p
PIP5K1B	0.0705741	0.592372	0.363636	3	hsa-miR-142-5p	hsa-miR-146a-5p	hsa-miR-27b-3p
PLK2	0.0705741	0.592372	0.363636	3	hsa-miR-128-3p/hsa-miR-128-3p/hsa-miR-216a-3p	hsa-miR-27b-3p	hsa-miR-429
PLRG1	0.0705741	0.592372	0.363636	3	hsa-miR-216b-5p	hsa-miR-384	hsa-miR-424-5p
POLK	0.0705741	0.592372	0.363636	3	hsa-miR-302b-3p/hsa-miR-520a-3p	hsa-miR-429	hsa-miR-92a-3p/hsa-miR-92b-3p
PPME1	0.0705741	0.592372	0.363636	3	hsa-miR-125a-5p/hsa-miR-125b-5p	hsa-miR-128-3p/hsa-miR-128-3p/hsa-miR-216a-3p	hsa-miR-27b-3p
PPP1R3A	0.0705741	0.592372	0.363636	3	hsa-miR-155-5p	hsa-miR-205-5p	hsa-miR-21-5p
PRDM8	0.0705741	0.592372	0.363636	3	hsa-miR-142-5p	hsa-miR-302b-3p/hsa-miR-520a-3p	hsa-miR-425-5p
PTGES3L	0.0705741	0.592372	0.363636	3	hsa-miR-374a-5p	hsa-miR-384	hsa-miR-9-5p
PTPN13	0.0705741	0.592372	0.363636	3	hsa-miR-26a-5p	hsa-miR-30b-5p/hsa-miR-30c-5p/hsa-miR-30d-5p	hsa-miR-429
RAB38	0.0705741	0.592372	0.363636	3	hsa-miR-141-3p/hsa-miR-200a-3p	hsa-miR-30b-5p/hsa-miR-30c-5p/hsa-miR-30d-5p	hsa-miR-374a-5p
RAB4B	0.0705741	0.592372	0.363636	3	hsa-miR-296-5p	hsa-miR-30b-5p/hsa-miR-30c-5p/hsa-miR-30d-5p	hsa-miR-424-5p
RAB7A	0.0705741	0.592372	0.363636	3	hsa-miR-30b-5p/hsa-miR-30c-5p/hsa-miR-30d-5p	hsa-miR-429	hsa-miR-448
RAG1	0.0705741	0.592372	0.363636	3	hsa-let-7b-5p/hsa-let-7e-5p/hsa-let-7f-5p	hsa-miR-141-3p/hsa-miR-200a-3p	hsa-miR-92a-3p/hsa-miR-92b-3p
RBM38	0.0705741	0.592372	0.363636	3	hsa-let-7b-5p/hsa-let-7e-5p/hsa-let-7f-5p	hsa-miR-125a-5p/hsa-miR-125b-5p	hsa-miR-186-5p/hsa-miR-186-5p
RCBTB1	0.0705741	0.592372	0.363636	3	hsa-miR-26a-5p	hsa-miR-27b-3p	hsa-miR-30b-5p/hsa-miR-30c-5p/hsa-miR-30d-5p
RHOT1	0.0705741	0.592372	0.363636	3	hsa-miR-142-5p	hsa-miR-204-5p	hsa-miR-429
RNF14	0.0705741	0.592372	0.363636	3	hsa-miR-374a-5p	hsa-miR-424-5p	hsa-miR-425-5p
RNF168	0.0705741	0.592372	0.363636	3	hsa-miR-125a-5p/hsa-miR-125b-5p	hsa-miR-28-3p	hsa-miR-7-5p
RP11-195F19.5	0.0705741	0.592372	0.363636	3	hsa-miR-155-5p	hsa-miR-423-5p	hsa-miR-494-3p
RSPO4	0.0705741	0.592372	0.363636	3	hsa-miR-138-5p	hsa-miR-204-5p	hsa-miR-34a-5p/hsa-miR-34c-5p/hsa-miR-449a/hsa-miR-449b-5p
RTN1	0.0705741	0.592372	0.363636	3	hsa-miR-142-5p	hsa-miR-26a-5p	hsa-miR-302b-3p/hsa-miR-520a-3p
SEC23A	0.0705741	0.592372	0.363636	3	hsa-miR-30b-5p/hsa-miR-30c-5p/hsa-miR-30d-5p	hsa-miR-371a-5p	hsa-miR-429
SEMA5B	0.0705741	0.592372	0.363636	3	hsa-miR-29a-3p/hsa-miR-29b-3p	hsa-miR-34a-5p/hsa-miR-34c-5p/hsa-miR-449a/hsa-miR-449b-5p	hsa-miR-424-5p
SLC26A3	0.0705741	0.592372	0.363636	3	hsa-miR-142-5p	hsa-miR-28-3p	hsa-miR-494-3p
SLC29A4	0.0705741	0.592372	0.363636	3	hsa-miR-128-3p/hsa-miR-128-3p/hsa-miR-216a-3p	hsa-miR-140-5p	hsa-miR-296-5p
SLC9A3R2	0.0705741	0.592372	0.363636	3	hsa-miR-135a-5p	hsa-miR-424-5p	hsa-miR-494-3p
STAB2	0.0705741	0.592372	0.363636	3	hsa-let-7b-5p/hsa-let-7e-5p/hsa-let-7f-5p	hsa-miR-128-3p/hsa-miR-128-3p/hsa-miR-216a-3p	hsa-miR-27b-3p
STAC2	0.0705741	0.592372	0.363636	3	hsa-miR-26a-5p	hsa-miR-34a-5p/hsa-miR-34c-5p/hsa-miR-449a/hsa-miR-449b-5p	hsa-miR-494-3p
STK3	0.0705741	0.592372	0.363636	3	hsa-miR-140-5p	hsa-miR-205-5p	hsa-miR-9-5p
SYNDIG1	0.0705741	0.592372	0.363636	3	hsa-miR-128-3p/hsa-miR-128-3p/hsa-miR-216a-3p	hsa-miR-424-5p	hsa-miR-92a-3p/hsa-miR-92b-3p
TGFBI	0.0705741	0.592372	0.363636	3	hsa-miR-21-5p	hsa-miR-362-3p	hsa-miR-9-5p
TMEM132E	0.0705741	0.592372	0.363636	3	hsa-miR-125a-5p/hsa-miR-125b-5p	hsa-miR-128-3p/hsa-miR-128-3p/hsa-miR-216a-3p	hsa-miR-362-5p
TMEM91	0.0705741	0.592372	0.363636	3	hsa-miR-128-3p/hsa-miR-128-3p/hsa-miR-216a-3p	hsa-miR-216a-5p	hsa-miR-27b-3p
TSPAN2	0.0705741	0.592372	0.363636	3	hsa-let-7b-5p/hsa-let-7e-5p/hsa-let-7f-5p	hsa-miR-21-5p	hsa-miR-30b-5p/hsa-miR-30c-5p/hsa-miR-30d-5p
UNC45B	0.0705741	0.592372	0.363636	3	hsa-miR-186-5p/hsa-miR-186-5p	hsa-miR-362-3p	hsa-miR-494-3p
USP12	0.0705741	0.592372	0.363636	3	hsa-let-7b-5p/hsa-let-7e-5p/hsa-let-7f-5p	hsa-miR-125a-5p/hsa-miR-125b-5p	hsa-miR-424-5p
WDR81	0.0705741	0.592372	0.363636	3	hsa-miR-141-3p/hsa-miR-200a-3p	hsa-miR-29a-3p/hsa-miR-29b-3p	hsa-miR-92a-3p/hsa-miR-92b-3p
YRDC	0.0705741	0.592372	0.363636	3	hsa-miR-29a-3p/hsa-miR-29b-3p	hsa-miR-424-5p	hsa-miR-9-5p
ZNF660	0.0705741	0.592372	0.363636	3	hsa-miR-141-3p/hsa-miR-200a-3p	hsa-miR-204-5p	hsa-miR-9-5p
ZNF783	0.0705741	0.592372	0.363636	3	hsa-let-7b-5p/hsa-let-7e-5p/hsa-let-7f-5p	hsa-miR-27b-3p	hsa-miR-9-5p
AMBRA1	0.0707952	0.592372	0.436364	4	hsa-miR-423-5p	hsa-miR-429	hsa-miR-7-5p	hsa-miR-9-5p
ANO4	0.0707952	0.592372	0.436364	4	hsa-miR-135a-5p	hsa-miR-30b-5p/hsa-miR-30c-5p/hsa-miR-30d-5p	hsa-miR-381-3p	hsa-miR-92a-3p/hsa-miR-92b-3p
ARHGAP36	0.0707952	0.592372	0.436364	4	hsa-miR-29a-3p/hsa-miR-29b-3p	hsa-miR-34a-5p/hsa-miR-34c-5p/hsa-miR-449a/hsa-miR-449b-5p	hsa-miR-425-5p	hsa-miR-494-3p
ARHGEF6	0.0707952	0.592372	0.436364	4	hsa-miR-135a-5p	hsa-miR-142-5p	hsa-miR-30b-5p/hsa-miR-30c-5p/hsa-miR-30d-5p	hsa-miR-448
ARPP21	0.0707952	0.592372	0.436364	4	hsa-miR-128-3p/hsa-miR-128-3p/hsa-miR-216a-3p	hsa-miR-424-5p	hsa-miR-501-3p	hsa-miR-9-5p
ATP8B1	0.0707952	0.592372	0.436364	4	hsa-miR-204-5p	hsa-miR-216a-5p	hsa-miR-30b-5p/hsa-miR-30c-5p/hsa-miR-30d-5p	hsa-miR-92a-3p/hsa-miR-92b-3p
C3orf80	0.0707952	0.592372	0.436364	4	hsa-miR-135a-5p	hsa-miR-205-5p	hsa-miR-362-5p	hsa-miR-371a-5p
C7orf43	0.0707952	0.592372	0.436364	4	hsa-miR-216a-5p	hsa-miR-302b-3p/hsa-miR-520a-3p	hsa-miR-30b-5p/hsa-miR-30c-5p/hsa-miR-30d-5p	hsa-miR-429
CADM4	0.0707952	0.592372	0.436364	4	hsa-miR-135a-5p	hsa-miR-34a-5p/hsa-miR-34c-5p/hsa-miR-449a/hsa-miR-449b-5p	hsa-miR-422a	hsa-miR-425-5p
CCNDBP1	0.0707952	0.592372	0.436364	4	hsa-miR-186-5p/hsa-miR-186-5p	hsa-miR-204-5p	hsa-miR-216b-5p	hsa-miR-9-5p
DUSP3	0.0707952	0.592372	0.436364	4	hsa-miR-125a-5p/hsa-miR-125b-5p	hsa-miR-141-3p/hsa-miR-200a-3p	hsa-miR-384	hsa-miR-448
EFNA2	0.0707952	0.592372	0.436364	4	hsa-miR-128-3p/hsa-miR-128-3p/hsa-miR-216a-3p	hsa-miR-21-5p	hsa-miR-27b-3p	hsa-miR-374a-5p
ERP29	0.0707952	0.592372	0.436364	4	hsa-let-7b-5p/hsa-let-7e-5p/hsa-let-7f-5p	hsa-miR-135a-5p	hsa-miR-205-5p	hsa-miR-371a-5p
EVI5L	0.0707952	0.592372	0.436364	4	hsa-miR-141-3p/hsa-miR-200a-3p	hsa-miR-30b-5p/hsa-miR-30c-5p/hsa-miR-30d-5p	hsa-miR-34a-5p/hsa-miR-34c-5p/hsa-miR-449a/hsa-miR-449b-5p	hsa-miR-9-5p
FAM193B	0.0707952	0.592372	0.436364	4	hsa-miR-128-3p/hsa-miR-128-3p/hsa-miR-216a-3p	hsa-miR-186-5p/hsa-miR-186-5p	hsa-miR-27b-3p	hsa-miR-29a-3p/hsa-miR-29b-3p
GATA2	0.0707952	0.592372	0.436364	4	hsa-miR-128-3p/hsa-miR-128-3p/hsa-miR-216a-3p	hsa-miR-27b-3p	hsa-miR-429	hsa-miR-92a-3p/hsa-miR-92b-3p
GCFC2	0.0707952	0.592372	0.436364	4	hsa-miR-216b-5p	hsa-miR-28-3p	hsa-miR-455-5p	hsa-miR-9-5p
GOLM1	0.0707952	0.592372	0.436364	4	hsa-miR-128-3p/hsa-miR-128-3p/hsa-miR-216a-3p	hsa-miR-141-3p/hsa-miR-200a-3p	hsa-miR-27b-3p	hsa-miR-381-3p
GPR174	0.0707952	0.592372	0.436364	4	hsa-miR-128-3p/hsa-miR-128-3p/hsa-miR-216a-3p	hsa-miR-141-3p/hsa-miR-200a-3p	hsa-miR-27b-3p	hsa-miR-424-5p
HEPHL1	0.0707952	0.592372	0.436364	4	hsa-miR-26a-5p	hsa-miR-30b-5p/hsa-miR-30c-5p/hsa-miR-30d-5p	hsa-miR-424-5p	hsa-miR-494-3p
HK2	0.0707952	0.592372	0.436364	4	hsa-let-7b-5p/hsa-let-7e-5p/hsa-let-7f-5p	hsa-miR-125a-5p/hsa-miR-125b-5p	hsa-miR-151a-3p	hsa-miR-9-5p
KCTD3	0.0707952	0.592372	0.436364	4	hsa-miR-155-5p	hsa-miR-29a-3p/hsa-miR-29b-3p	hsa-miR-30b-5p/hsa-miR-30c-5p/hsa-miR-30d-5p	hsa-miR-381-3p
MED29	0.0707952	0.592372	0.436364	4	hsa-miR-296-3p	hsa-miR-371a-5p	hsa-miR-92a-3p/hsa-miR-92b-3p	hsa-miR-9-5p
METTL24	0.0707952	0.592372	0.436364	4	hsa-miR-125a-5p/hsa-miR-125b-5p	hsa-miR-141-3p/hsa-miR-200a-3p	hsa-miR-186-5p/hsa-miR-186-5p	hsa-miR-216b-5p
NEUROG2	0.0707952	0.592372	0.436364	4	hsa-miR-204-5p	hsa-miR-216a-5p	hsa-miR-216b-5p	hsa-miR-374a-5p
NFE2L2	0.0707952	0.592372	0.436364	4	hsa-miR-128-3p/hsa-miR-128-3p/hsa-miR-216a-3p	hsa-miR-140-5p	hsa-miR-142-5p	hsa-miR-27b-3p
NR2C1	0.0707952	0.592372	0.436364	4	hsa-miR-142-5p	hsa-miR-302b-3p/hsa-miR-520a-3p	hsa-miR-494-3p	hsa-miR-7-5p
NYNRIN	0.0707952	0.592372	0.436364	4	hsa-let-7b-5p/hsa-let-7e-5p/hsa-let-7f-5p	hsa-miR-296-5p	hsa-miR-362-5p	hsa-miR-424-5p
OSTF1	0.0707952	0.592372	0.436364	4	hsa-let-7b-5p/hsa-let-7e-5p/hsa-let-7f-5p	hsa-miR-142-5p	hsa-miR-204-5p	hsa-miR-374a-5p
PARD3B	0.0707952	0.592372	0.436364	4	hsa-miR-155-5p	hsa-miR-186-5p/hsa-miR-186-5p	hsa-miR-216a-5p	hsa-miR-429
PATL1	0.0707952	0.592372	0.436364	4	hsa-miR-135a-5p	hsa-miR-381-3p	hsa-miR-455-5p	hsa-miR-7-5p
PGAP1	0.0707952	0.592372	0.436364	4	hsa-miR-128-3p/hsa-miR-128-3p/hsa-miR-216a-3p	hsa-miR-27b-3p	hsa-miR-29a-3p/hsa-miR-29b-3p	hsa-miR-9-5p
PLEKHA2	0.0707952	0.592372	0.436364	4	hsa-miR-135a-5p	hsa-miR-27b-3p	hsa-miR-296-5p	hsa-miR-494-3p
PPIF	0.0707952	0.592372	0.436364	4	hsa-miR-128-3p/hsa-miR-128-3p/hsa-miR-216a-3p	hsa-miR-27b-3p	hsa-miR-424-5p	hsa-miR-7-5p
PRELID2	0.0707952	0.592372	0.436364	4	hsa-miR-128-3p/hsa-miR-128-3p/hsa-miR-216a-3p	hsa-miR-141-3p/hsa-miR-200a-3p	hsa-miR-146a-5p	hsa-miR-27b-3p
PSIP1	0.0707952	0.592372	0.436364	4	hsa-miR-135a-5p	hsa-miR-381-3p	hsa-miR-429	hsa-miR-501-3p
PTPRK	0.0707952	0.592372	0.436364	4	hsa-miR-29a-3p/hsa-miR-29b-3p	hsa-miR-30b-5p/hsa-miR-30c-5p/hsa-miR-30d-5p	hsa-miR-92a-3p/hsa-miR-92b-3p	hsa-miR-9-5p
R3HDM2	0.0707952	0.592372	0.436364	4	hsa-miR-371a-5p	hsa-miR-381-3p	hsa-miR-429	hsa-miR-455-5p
RAB3D	0.0707952	0.592372	0.436364	4	hsa-miR-125a-5p/hsa-miR-125b-5p	hsa-miR-27b-3p	hsa-miR-30b-5p/hsa-miR-30c-5p/hsa-miR-30d-5p	hsa-miR-424-5p
RNF19A	0.0707952	0.592372	0.436364	4	hsa-miR-140-5p	hsa-miR-29a-3p/hsa-miR-29b-3p	hsa-miR-448	hsa-miR-9-5p
RNF213	0.0707952	0.592372	0.436364	4	hsa-miR-205-5p	hsa-miR-26a-5p	hsa-miR-34a-5p/hsa-miR-34c-5p/hsa-miR-449a/hsa-miR-449b-5p	hsa-miR-424-5p
SCAF8	0.0707952	0.592372	0.436364	4	hsa-miR-141-3p/hsa-miR-200a-3p	hsa-miR-186-5p/hsa-miR-186-5p	hsa-miR-216b-5p	hsa-miR-381-3p
SEC22C	0.0707952	0.592372	0.436364	4	hsa-miR-140-5p	hsa-miR-204-5p	hsa-miR-216a-5p	hsa-miR-30b-5p/hsa-miR-30c-5p/hsa-miR-30d-5p
SERTAD3	0.0707952	0.592372	0.436364	4	hsa-miR-125a-5p/hsa-miR-125b-5p	hsa-miR-27b-3p	hsa-miR-7-5p	hsa-miR-92a-3p/hsa-miR-92b-3p
SHROOM2	0.0707952	0.592372	0.436364	4	hsa-miR-27b-3p	hsa-miR-29a-3p/hsa-miR-29b-3p	hsa-miR-429	hsa-miR-9-5p
SLC25A15	0.0707952	0.592372	0.436364	4	hsa-miR-125a-5p/hsa-miR-125b-5p	hsa-miR-142-5p	hsa-miR-29a-3p/hsa-miR-29b-3p	hsa-miR-7-5p
SMS	0.0707952	0.592372	0.436364	4	hsa-miR-155-5p	hsa-miR-26a-5p	hsa-miR-29a-3p/hsa-miR-29b-3p	hsa-miR-424-5p
SNAI1	0.0707952	0.592372	0.436364	4	hsa-miR-128-3p/hsa-miR-128-3p/hsa-miR-216a-3p	hsa-miR-27b-3p	hsa-miR-30b-5p/hsa-miR-30c-5p/hsa-miR-30d-5p	hsa-miR-92a-3p/hsa-miR-92b-3p
SRRM3	0.0707952	0.592372	0.436364	4	hsa-miR-125a-5p/hsa-miR-125b-5p	hsa-miR-296-5p	hsa-miR-423-5p	hsa-miR-7-5p
SYT4	0.0707952	0.592372	0.436364	4	hsa-miR-141-3p/hsa-miR-200a-3p	hsa-miR-424-5p	hsa-miR-448	hsa-miR-9-5p
TMTC1	0.0707952	0.592372	0.436364	4	hsa-miR-142-5p	hsa-miR-186-5p/hsa-miR-186-5p	hsa-miR-216a-5p	hsa-miR-9-5p
TMUB2	0.0707952	0.592372	0.436364	4	hsa-miR-29a-3p/hsa-miR-29b-3p	hsa-miR-302b-3p/hsa-miR-520a-3p	hsa-miR-34a-5p/hsa-miR-34c-5p/hsa-miR-449a/hsa-miR-449b-5p	hsa-miR-423-5p
TTPA	0.0707952	0.592372	0.436364	4	hsa-miR-125a-5p/hsa-miR-125b-5p	hsa-miR-142-5p	hsa-miR-186-5p/hsa-miR-186-5p	hsa-miR-30b-5p/hsa-miR-30c-5p/hsa-miR-30d-5p
USP3	0.0707952	0.592372	0.436364	4	hsa-miR-146a-5p	hsa-miR-26a-5p	hsa-miR-424-5p	hsa-miR-455-5p
WDR45B	0.0707952	0.592372	0.436364	4	hsa-miR-135a-5p	hsa-miR-429	hsa-miR-455-5p	hsa-miR-494-3p
WNT1	0.0707952	0.592372	0.436364	4	hsa-let-7b-5p/hsa-let-7e-5p/hsa-let-7f-5p	hsa-miR-140-5p	hsa-miR-34a-5p/hsa-miR-34c-5p/hsa-miR-449a/hsa-miR-449b-5p	hsa-miR-362-3p
WNT5A	0.0707952	0.592372	0.436364	4	hsa-miR-141-3p/hsa-miR-200a-3p	hsa-miR-26a-5p	hsa-miR-374a-5p	hsa-miR-381-3p
ZDHHC13	0.0707952	0.592372	0.436364	4	hsa-miR-135a-5p	hsa-miR-146a-5p	hsa-miR-186-5p/hsa-miR-186-5p	hsa-miR-494-3p
CADM2	0.0708075	0.592372	0.672727	12	hsa-let-7b-5p/hsa-let-7e-5p/hsa-let-7f-5p	hsa-miR-141-3p/hsa-miR-200a-3p	hsa-miR-142-5p	hsa-miR-186-5p/hsa-miR-186-5p	hsa-miR-21-5p	hsa-miR-216a-5p	hsa-miR-302b-3p/hsa-miR-520a-3p	hsa-miR-30b-5p/hsa-miR-30c-5p/hsa-miR-30d-5p	hsa-miR-371a-5p	hsa-miR-374a-5p	hsa-miR-448	hsa-miR-92a-3p/hsa-miR-92b-3p
PLAG1	0.0708075	0.592372	0.672727	12	hsa-miR-128-3p/hsa-miR-128-3p/hsa-miR-216a-3p	hsa-miR-141-3p/hsa-miR-200a-3p	hsa-miR-155-5p	hsa-miR-204-5p	hsa-miR-21-5p	hsa-miR-27b-3p	hsa-miR-29a-3p/hsa-miR-29b-3p	hsa-miR-302b-3p/hsa-miR-520a-3p	hsa-miR-34a-5p/hsa-miR-34c-5p/hsa-miR-449a/hsa-miR-449b-5p	hsa-miR-424-5p	hsa-miR-7-5p	hsa-miR-9-5p
BCL11B	0.0712487	0.593375	0.688112	13	hsa-miR-186-5p/hsa-miR-186-5p	hsa-miR-204-5p	hsa-miR-21-5p	hsa-miR-216a-5p	hsa-miR-29a-3p/hsa-miR-29b-3p	hsa-miR-302b-3p/hsa-miR-520a-3p	hsa-miR-30b-5p/hsa-miR-30c-5p/hsa-miR-30d-5p	hsa-miR-34a-5p/hsa-miR-34c-5p/hsa-miR-449a/hsa-miR-449b-5p	hsa-miR-374a-5p	hsa-miR-381-3p	hsa-miR-424-5p	hsa-miR-429	hsa-miR-92a-3p/hsa-miR-92b-3p
G3BP1	0.0712487	0.593375	0.688112	13	hsa-let-7b-5p/hsa-let-7e-5p/hsa-let-7f-5p	hsa-miR-125a-5p/hsa-miR-125b-5p	hsa-miR-142-5p	hsa-miR-155-5p	hsa-miR-204-5p	hsa-miR-29a-3p/hsa-miR-29b-3p	hsa-miR-302b-3p/hsa-miR-520a-3p	hsa-miR-30b-5p/hsa-miR-30c-5p/hsa-miR-30d-5p	hsa-miR-34a-5p/hsa-miR-34c-5p/hsa-miR-449a/hsa-miR-449b-5p	hsa-miR-362-3p	hsa-miR-381-3p	hsa-miR-423-5p	hsa-miR-494-3p
KIAA1468	0.0712487	0.593375	0.688112	13	hsa-miR-135a-5p	hsa-miR-138-5p	hsa-miR-155-5p	hsa-miR-186-5p/hsa-miR-186-5p	hsa-miR-21-5p	hsa-miR-216a-5p	hsa-miR-216b-5p	hsa-miR-26a-5p	hsa-miR-371a-5p	hsa-miR-374a-5p	hsa-miR-381-3p	hsa-miR-429	hsa-miR-9-5p
PSD3	0.0712487	0.593375	0.688112	13	hsa-miR-135a-5p	hsa-miR-186-5p/hsa-miR-186-5p	hsa-miR-205-5p	hsa-miR-26a-5p	hsa-miR-302b-3p/hsa-miR-520a-3p	hsa-miR-30b-5p/hsa-miR-30c-5p/hsa-miR-30d-5p	hsa-miR-34a-5p/hsa-miR-34c-5p/hsa-miR-449a/hsa-miR-449b-5p	hsa-miR-381-3p	hsa-miR-422a	hsa-miR-448	hsa-miR-494-3p	hsa-miR-501-3p	hsa-miR-9-5p
RFX3	0.0712487	0.593375	0.688112	13	hsa-miR-125a-5p/hsa-miR-125b-5p	hsa-miR-128-3p/hsa-miR-128-3p/hsa-miR-216a-3p	hsa-miR-155-5p	hsa-miR-216b-5p	hsa-miR-26a-5p	hsa-miR-27b-3p	hsa-miR-30b-5p/hsa-miR-30c-5p/hsa-miR-30d-5p	hsa-miR-34a-5p/hsa-miR-34c-5p/hsa-miR-449a/hsa-miR-449b-5p	hsa-miR-374a-5p	hsa-miR-381-3p	hsa-miR-424-5p	hsa-miR-92a-3p/hsa-miR-92b-3p	hsa-miR-9-5p
CACNA2D1	0.0756151	0.606783	0.6	8	hsa-miR-138-5p	hsa-miR-141-3p/hsa-miR-200a-3p	hsa-miR-155-5p	hsa-miR-26a-5p	hsa-miR-34a-5p/hsa-miR-34c-5p/hsa-miR-449a/hsa-miR-449b-5p	hsa-miR-424-5p	hsa-miR-429	hsa-miR-92a-3p/hsa-miR-92b-3p
FNIP2	0.0756151	0.606783	0.6	8	hsa-let-7b-5p/hsa-let-7e-5p/hsa-let-7f-5p	hsa-miR-141-3p/hsa-miR-200a-3p	hsa-miR-216a-5p	hsa-miR-30b-5p/hsa-miR-30c-5p/hsa-miR-30d-5p	hsa-miR-424-5p	hsa-miR-501-3p	hsa-miR-92a-3p/hsa-miR-92b-3p	hsa-miR-9-5p
HDAC4	0.0756151	0.606783	0.6	8	hsa-miR-128-3p/hsa-miR-128-3p/hsa-miR-216a-3p	hsa-miR-135a-5p	hsa-miR-138-5p	hsa-miR-140-5p	hsa-miR-141-3p/hsa-miR-200a-3p	hsa-miR-29a-3p/hsa-miR-29b-3p	hsa-miR-302b-3p/hsa-miR-520a-3p	hsa-miR-429
IKZF2	0.0756151	0.606783	0.6	8	hsa-let-7b-5p/hsa-let-7e-5p/hsa-let-7f-5p	hsa-miR-128-3p/hsa-miR-128-3p/hsa-miR-216a-3p	hsa-miR-141-3p/hsa-miR-200a-3p	hsa-miR-27b-3p	hsa-miR-302b-3p/hsa-miR-520a-3p	hsa-miR-30b-5p/hsa-miR-30c-5p/hsa-miR-30d-5p	hsa-miR-92a-3p/hsa-miR-92b-3p	hsa-miR-9-5p
JARID2	0.0756151	0.606783	0.6	8	hsa-miR-142-5p	hsa-miR-155-5p	hsa-miR-204-5p	hsa-miR-26a-5p	hsa-miR-29a-3p/hsa-miR-29b-3p	hsa-miR-30b-5p/hsa-miR-30c-5p/hsa-miR-30d-5p	hsa-miR-424-5p	hsa-miR-92a-3p/hsa-miR-92b-3p
KIF1B	0.0756151	0.606783	0.6	8	hsa-miR-140-5p	hsa-miR-205-5p	hsa-miR-216b-5p	hsa-miR-302b-3p/hsa-miR-520a-3p	hsa-miR-381-3p	hsa-miR-424-5p	hsa-miR-455-5p	hsa-miR-92a-3p/hsa-miR-92b-3p
PIK3R3	0.0756151	0.606783	0.6	8	hsa-miR-135a-5p	hsa-miR-186-5p/hsa-miR-186-5p	hsa-miR-26a-5p	hsa-miR-29a-3p/hsa-miR-29b-3p	hsa-miR-302b-3p/hsa-miR-520a-3p	hsa-miR-7-5p	hsa-miR-92a-3p/hsa-miR-92b-3p	hsa-miR-9-5p
PITPNM2	0.0756151	0.606783	0.6	8	hsa-miR-128-3p/hsa-miR-128-3p/hsa-miR-216a-3p	hsa-miR-27b-3p	hsa-miR-29a-3p/hsa-miR-29b-3p	hsa-miR-30b-5p/hsa-miR-30c-5p/hsa-miR-30d-5p	hsa-miR-34a-5p/hsa-miR-34c-5p/hsa-miR-449a/hsa-miR-449b-5p	hsa-miR-423-5p	hsa-miR-92a-3p/hsa-miR-92b-3p	hsa-miR-9-5p
PRPF38B	0.0756151	0.606783	0.6	8	hsa-let-7b-5p/hsa-let-7e-5p/hsa-let-7f-5p	hsa-miR-204-5p	hsa-miR-216a-5p	hsa-miR-34a-5p/hsa-miR-34c-5p/hsa-miR-449a/hsa-miR-449b-5p	hsa-miR-371a-5p	hsa-miR-374a-5p	hsa-miR-381-3p	hsa-miR-429
SLC30A4	0.0756151	0.606783	0.6	8	hsa-let-7b-5p/hsa-let-7e-5p/hsa-let-7f-5p	hsa-miR-135a-5p	hsa-miR-142-5p	hsa-miR-216a-5p	hsa-miR-30b-5p/hsa-miR-30c-5p/hsa-miR-30d-5p	hsa-miR-381-3p	hsa-miR-384	hsa-miR-494-3p
TRIM13	0.0756151	0.606783	0.6	8	hsa-miR-138-5p	hsa-miR-141-3p/hsa-miR-200a-3p	hsa-miR-204-5p	hsa-miR-216b-5p	hsa-miR-27b-3p	hsa-miR-30b-5p/hsa-miR-30c-5p/hsa-miR-30d-5p	hsa-miR-34a-5p/hsa-miR-34c-5p/hsa-miR-449a/hsa-miR-449b-5p	hsa-miR-371a-5p
TTC9	0.0756151	0.606783	0.6	8	hsa-miR-128-3p/hsa-miR-128-3p/hsa-miR-216a-3p	hsa-miR-216a-5p	hsa-miR-216b-5p	hsa-miR-27b-3p	hsa-miR-296-5p	hsa-miR-29a-3p/hsa-miR-29b-3p	hsa-miR-302b-3p/hsa-miR-520a-3p	hsa-miR-92a-3p/hsa-miR-92b-3p
VAV3	0.0756151	0.606783	0.6	8	hsa-let-7b-5p/hsa-let-7e-5p/hsa-let-7f-5p	hsa-miR-125a-5p/hsa-miR-125b-5p	hsa-miR-128-3p/hsa-miR-128-3p/hsa-miR-216a-3p	hsa-miR-155-5p	hsa-miR-27b-3p	hsa-miR-30b-5p/hsa-miR-30c-5p/hsa-miR-30d-5p	hsa-miR-381-3p	hsa-miR-9-5p
XKR7	0.0756151	0.606783	0.6	8	hsa-let-7b-5p/hsa-let-7e-5p/hsa-let-7f-5p	hsa-miR-141-3p/hsa-miR-200a-3p	hsa-miR-204-5p	hsa-miR-296-5p	hsa-miR-29a-3p/hsa-miR-29b-3p	hsa-miR-381-3p	hsa-miR-448	hsa-miR-92a-3p/hsa-miR-92b-3p
XRN1	0.0756151	0.606783	0.6	8	hsa-let-7b-5p/hsa-let-7e-5p/hsa-let-7f-5p	hsa-miR-138-5p	hsa-miR-155-5p	hsa-miR-204-5p	hsa-miR-205-5p	hsa-miR-29a-3p/hsa-miR-29b-3p	hsa-miR-92a-3p/hsa-miR-92b-3p	hsa-miR-9-5p
TNRC6B	0.0791076	0.606783	0.744385	17	hsa-miR-128-3p/hsa-miR-128-3p/hsa-miR-216a-3p	hsa-miR-138-5p	hsa-miR-141-3p/hsa-miR-200a-3p	hsa-miR-204-5p	hsa-miR-205-5p	hsa-miR-21-5p	hsa-miR-26a-5p	hsa-miR-29a-3p/hsa-miR-29b-3p	hsa-miR-30b-5p/hsa-miR-30c-5p/hsa-miR-30d-5p	hsa-miR-34a-5p/hsa-miR-34c-5p/hsa-miR-449a/hsa-miR-449b-5p	hsa-miR-362-3p	hsa-miR-423-5p	hsa-miR-424-5p	hsa-miR-455-5p	hsa-miR-7-5p	hsa-miR-92a-3p/hsa-miR-92b-3p	hsa-miR-9-5p
AMMECR1L	0.0800897	0.606783	0.545455	6	hsa-let-7b-5p/hsa-let-7e-5p/hsa-let-7f-5p	hsa-miR-128-3p/hsa-miR-128-3p/hsa-miR-216a-3p	hsa-miR-27b-3p	hsa-miR-296-5p	hsa-miR-29a-3p/hsa-miR-29b-3p	hsa-miR-424-5p
ARID1B	0.0800897	0.606783	0.545455	6	hsa-miR-128-3p/hsa-miR-128-3p/hsa-miR-216a-3p	hsa-miR-142-5p	hsa-miR-27b-3p	hsa-miR-29a-3p/hsa-miR-29b-3p	hsa-miR-92a-3p/hsa-miR-92b-3p	hsa-miR-9-5p
ARID3A	0.0800897	0.606783	0.545455	6	hsa-let-7b-5p/hsa-let-7e-5p/hsa-let-7f-5p	hsa-miR-125a-5p/hsa-miR-125b-5p	hsa-miR-128-3p/hsa-miR-128-3p/hsa-miR-216a-3p	hsa-miR-26a-5p	hsa-miR-30b-5p/hsa-miR-30c-5p/hsa-miR-30d-5p	hsa-miR-384
BAK1	0.0800897	0.606783	0.545455	6	hsa-miR-125a-5p/hsa-miR-125b-5p	hsa-miR-128-3p/hsa-miR-128-3p/hsa-miR-216a-3p	hsa-miR-26a-5p	hsa-miR-27b-3p	hsa-miR-29a-3p/hsa-miR-29b-3p	hsa-miR-92a-3p/hsa-miR-92b-3p
C2CD2	0.0800897	0.606783	0.545455	6	hsa-miR-128-3p/hsa-miR-128-3p/hsa-miR-216a-3p	hsa-miR-135a-5p	hsa-miR-142-5p	hsa-miR-27b-3p	hsa-miR-302b-3p/hsa-miR-520a-3p	hsa-miR-9-5p
CADM3	0.0800897	0.606783	0.545455	6	hsa-miR-135a-5p	hsa-miR-140-5p	hsa-miR-142-5p	hsa-miR-296-5p	hsa-miR-423-5p	hsa-miR-7-5p
CKAP4	0.0800897	0.606783	0.545455	6	hsa-miR-128-3p/hsa-miR-128-3p/hsa-miR-216a-3p	hsa-miR-186-5p/hsa-miR-186-5p	hsa-miR-27b-3p	hsa-miR-429	hsa-miR-448	hsa-miR-7-5p
CLASP2	0.0800897	0.606783	0.545455	6	hsa-let-7b-5p/hsa-let-7e-5p/hsa-let-7f-5p	hsa-miR-141-3p/hsa-miR-200a-3p	hsa-miR-151a-3p	hsa-miR-26a-5p	hsa-miR-429	hsa-miR-7-5p
CUX2	0.0800897	0.606783	0.545455	6	hsa-miR-135a-5p	hsa-miR-205-5p	hsa-miR-216a-5p	hsa-miR-216b-5p	hsa-miR-302b-3p/hsa-miR-520a-3p	hsa-miR-381-3p
EPHB2	0.0800897	0.606783	0.545455	6	hsa-miR-128-3p/hsa-miR-128-3p/hsa-miR-216a-3p	hsa-miR-204-5p	hsa-miR-27b-3p	hsa-miR-30b-5p/hsa-miR-30c-5p/hsa-miR-30d-5p	hsa-miR-448	hsa-miR-9-5p
GPR158	0.0800897	0.606783	0.545455	6	hsa-miR-135a-5p	hsa-miR-138-5p	hsa-miR-34a-5p/hsa-miR-34c-5p/hsa-miR-449a/hsa-miR-449b-5p	hsa-miR-429	hsa-miR-494-3p	hsa-miR-92a-3p/hsa-miR-92b-3p
GRAMD4	0.0800897	0.606783	0.545455	6	hsa-miR-135a-5p	hsa-miR-204-5p	hsa-miR-374a-5p	hsa-miR-381-3p	hsa-miR-92a-3p/hsa-miR-92b-3p	hsa-miR-9-5p
KDM5C	0.0800897	0.606783	0.545455	6	hsa-miR-138-5p	hsa-miR-29a-3p/hsa-miR-29b-3p	hsa-miR-362-3p	hsa-miR-362-5p	hsa-miR-448	hsa-miR-494-3p
LRP4	0.0800897	0.606783	0.545455	6	hsa-miR-125a-5p/hsa-miR-125b-5p	hsa-miR-140-5p	hsa-miR-142-5p	hsa-miR-205-5p	hsa-miR-216b-5p	hsa-miR-429
NOTCH2	0.0800897	0.606783	0.545455	6	hsa-miR-204-5p	hsa-miR-205-5p	hsa-miR-29a-3p/hsa-miR-29b-3p	hsa-miR-34a-5p/hsa-miR-34c-5p/hsa-miR-449a/hsa-miR-449b-5p	hsa-miR-424-5p	hsa-miR-9-5p
NSG1	0.0800897	0.606783	0.545455	6	hsa-miR-135a-5p	hsa-miR-142-5p	hsa-miR-204-5p	hsa-miR-30b-5p/hsa-miR-30c-5p/hsa-miR-30d-5p	hsa-miR-424-5p	hsa-miR-92a-3p/hsa-miR-92b-3p
PDAP1	0.0800897	0.606783	0.545455	6	hsa-miR-138-5p	hsa-miR-30b-5p/hsa-miR-30c-5p/hsa-miR-30d-5p	hsa-miR-371a-5p	hsa-miR-381-3p	hsa-miR-423-5p	hsa-miR-424-5p
RAI14	0.0800897	0.606783	0.545455	6	hsa-miR-128-3p/hsa-miR-128-3p/hsa-miR-216a-3p	hsa-miR-302b-3p/hsa-miR-520a-3p	hsa-miR-30b-5p/hsa-miR-30c-5p/hsa-miR-30d-5p	hsa-miR-448	hsa-miR-501-3p	hsa-miR-9-5p
RHOBTB1	0.0800897	0.606783	0.545455	6	hsa-miR-141-3p/hsa-miR-200a-3p	hsa-miR-142-5p	hsa-miR-204-5p	hsa-miR-29a-3p/hsa-miR-29b-3p	hsa-miR-384	hsa-miR-9-5p
RSPO3	0.0800897	0.606783	0.545455	6	hsa-miR-128-3p/hsa-miR-128-3p/hsa-miR-216a-3p	hsa-miR-141-3p/hsa-miR-200a-3p	hsa-miR-204-5p	hsa-miR-27b-3p	hsa-miR-28-3p	hsa-miR-424-5p
SLC39A13	0.0800897	0.606783	0.545455	6	hsa-miR-125a-5p/hsa-miR-125b-5p	hsa-miR-128-3p/hsa-miR-128-3p/hsa-miR-216a-3p	hsa-miR-135a-5p	hsa-miR-27b-3p	hsa-miR-29a-3p/hsa-miR-29b-3p	hsa-miR-9-5p
TIAM1	0.0800897	0.606783	0.545455	6	hsa-miR-135a-5p	hsa-miR-141-3p/hsa-miR-200a-3p	hsa-miR-142-5p	hsa-miR-21-5p	hsa-miR-29a-3p/hsa-miR-29b-3p	hsa-miR-302b-3p/hsa-miR-520a-3p
TNFAIP8	0.0800897	0.606783	0.545455	6	hsa-miR-125a-5p/hsa-miR-125b-5p	hsa-miR-138-5p	hsa-miR-205-5p	hsa-miR-384	hsa-miR-455-5p	hsa-miR-9-5p
UBASH3B	0.0800897	0.606783	0.545455	6	hsa-miR-125a-5p/hsa-miR-125b-5p	hsa-miR-141-3p/hsa-miR-200a-3p	hsa-miR-302b-3p/hsa-miR-520a-3p	hsa-miR-455-5p	hsa-miR-92a-3p/hsa-miR-92b-3p	hsa-miR-9-5p
ZNF641	0.0800897	0.606783	0.545455	6	hsa-let-7b-5p/hsa-let-7e-5p/hsa-let-7f-5p	hsa-miR-141-3p/hsa-miR-200a-3p	hsa-miR-29a-3p/hsa-miR-29b-3p	hsa-miR-34a-5p/hsa-miR-34c-5p/hsa-miR-449a/hsa-miR-449b-5p	hsa-miR-371a-5p	hsa-miR-494-3p
ARFGEF1	0.0804846	0.606783	0.630303	9	hsa-miR-128-3p/hsa-miR-128-3p/hsa-miR-216a-3p	hsa-miR-186-5p/hsa-miR-186-5p	hsa-miR-205-5p	hsa-miR-26a-5p	hsa-miR-27b-3p	hsa-miR-362-5p	hsa-miR-494-3p	hsa-miR-92a-3p/hsa-miR-92b-3p	hsa-miR-9-5p
HGF	0.0804846	0.606783	0.630303	9	hsa-miR-128-3p/hsa-miR-128-3p/hsa-miR-216a-3p	hsa-miR-141-3p/hsa-miR-200a-3p	hsa-miR-142-5p	hsa-miR-204-5p	hsa-miR-21-5p	hsa-miR-26a-5p	hsa-miR-27b-3p	hsa-miR-374a-5p	hsa-miR-381-3p
HS2ST1	0.0804846	0.606783	0.630303	9	hsa-let-7b-5p/hsa-let-7e-5p/hsa-let-7f-5p	hsa-miR-140-5p	hsa-miR-141-3p/hsa-miR-200a-3p	hsa-miR-142-5p	hsa-miR-26a-5p	hsa-miR-27b-3p	hsa-miR-302b-3p/hsa-miR-520a-3p	hsa-miR-34a-5p/hsa-miR-34c-5p/hsa-miR-449a/hsa-miR-449b-5p	hsa-miR-429
PAQR3	0.0804846	0.606783	0.630303	9	hsa-miR-138-5p	hsa-miR-186-5p/hsa-miR-186-5p	hsa-miR-27b-3p	hsa-miR-29a-3p/hsa-miR-29b-3p	hsa-miR-302b-3p/hsa-miR-520a-3p	hsa-miR-374a-5p	hsa-miR-424-5p	hsa-miR-429	hsa-miR-448
RGS7BP	0.0804846	0.606783	0.630303	9	hsa-miR-125a-5p/hsa-miR-125b-5p	hsa-miR-141-3p/hsa-miR-200a-3p	hsa-miR-21-5p	hsa-miR-216a-5p	hsa-miR-34a-5p/hsa-miR-34c-5p/hsa-miR-449a/hsa-miR-449b-5p	hsa-miR-374a-5p	hsa-miR-384	hsa-miR-448	hsa-miR-7-5p
RIMS3	0.0804846	0.606783	0.630303	9	hsa-let-7b-5p/hsa-let-7e-5p/hsa-let-7f-5p	hsa-miR-128-3p/hsa-miR-128-3p/hsa-miR-216a-3p	hsa-miR-138-5p	hsa-miR-27b-3p	hsa-miR-34a-5p/hsa-miR-34c-5p/hsa-miR-449a/hsa-miR-449b-5p	hsa-miR-384	hsa-miR-424-5p	hsa-miR-429	hsa-miR-9-5p
VCAN	0.0804846	0.606783	0.630303	9	hsa-miR-128-3p/hsa-miR-128-3p/hsa-miR-216a-3p	hsa-miR-135a-5p	hsa-miR-141-3p/hsa-miR-200a-3p	hsa-miR-27b-3p	hsa-miR-30b-5p/hsa-miR-30c-5p/hsa-miR-30d-5p	hsa-miR-381-3p	hsa-miR-455-5p	hsa-miR-494-3p	hsa-miR-9-5p
ZBTB43	0.0804846	0.606783	0.630303	9	hsa-miR-142-5p	hsa-miR-29a-3p/hsa-miR-29b-3p	hsa-miR-302b-3p/hsa-miR-520a-3p	hsa-miR-374a-5p	hsa-miR-424-5p	hsa-miR-425-5p	hsa-miR-448	hsa-miR-494-3p	hsa-miR-501-3p
PTEN	0.0813587	0.606783	0.736364	16	hsa-miR-141-3p/hsa-miR-200a-3p	hsa-miR-142-5p	hsa-miR-186-5p/hsa-miR-186-5p	hsa-miR-205-5p	hsa-miR-216a-5p	hsa-miR-26a-5p	hsa-miR-296-3p	hsa-miR-29a-3p/hsa-miR-29b-3p	hsa-miR-362-3p	hsa-miR-371a-5p	hsa-miR-374a-5p	hsa-miR-425-5p	hsa-miR-429	hsa-miR-494-3p	hsa-miR-92a-3p/hsa-miR-92b-3p	hsa-miR-9-5p
ATXN1	0.0832468	0.606783	0.727273	15	hsa-miR-125a-5p/hsa-miR-125b-5p	hsa-miR-135a-5p	hsa-miR-141-3p/hsa-miR-200a-3p	hsa-miR-142-5p	hsa-miR-204-5p	hsa-miR-29a-3p/hsa-miR-29b-3p	hsa-miR-302b-3p/hsa-miR-520a-3p	hsa-miR-30b-5p/hsa-miR-30c-5p/hsa-miR-30d-5p	hsa-miR-362-3p	hsa-miR-374a-5p	hsa-miR-429	hsa-miR-501-3p	hsa-miR-7-5p	hsa-miR-92a-3p/hsa-miR-92b-3p	hsa-miR-9-5p
ADAM10	0.0835403	0.606783	0.654545	10	hsa-miR-128-3p/hsa-miR-128-3p/hsa-miR-216a-3p	hsa-miR-140-5p	hsa-miR-155-5p	hsa-miR-26a-5p	hsa-miR-30b-5p/hsa-miR-30c-5p/hsa-miR-30d-5p	hsa-miR-34a-5p/hsa-miR-34c-5p/hsa-miR-449a/hsa-miR-449b-5p	hsa-miR-374a-5p	hsa-miR-494-3p	hsa-miR-92a-3p/hsa-miR-92b-3p	hsa-miR-9-5p
HAPLN1	0.0835403	0.606783	0.654545	10	hsa-miR-125a-5p/hsa-miR-125b-5p	hsa-miR-128-3p/hsa-miR-128-3p/hsa-miR-216a-3p	hsa-miR-204-5p	hsa-miR-26a-5p	hsa-miR-27b-3p	hsa-miR-29a-3p/hsa-miR-29b-3p	hsa-miR-374a-5p	hsa-miR-448	hsa-miR-92a-3p/hsa-miR-92b-3p	hsa-miR-9-5p
RALGPS2	0.0835403	0.606783	0.654545	10	hsa-miR-125a-5p/hsa-miR-125b-5p	hsa-miR-135a-5p	hsa-miR-140-5p	hsa-miR-141-3p/hsa-miR-200a-3p	hsa-miR-204-5p	hsa-miR-21-5p	hsa-miR-30b-5p/hsa-miR-30c-5p/hsa-miR-30d-5p	hsa-miR-34a-5p/hsa-miR-34c-5p/hsa-miR-449a/hsa-miR-449b-5p	hsa-miR-429	hsa-miR-448
RAP1B	0.0835403	0.606783	0.654545	10	hsa-miR-128-3p/hsa-miR-128-3p/hsa-miR-216a-3p	hsa-miR-140-5p	hsa-miR-155-5p	hsa-miR-216b-5p	hsa-miR-26a-5p	hsa-miR-27b-3p	hsa-miR-30b-5p/hsa-miR-30c-5p/hsa-miR-30d-5p	hsa-miR-429	hsa-miR-92a-3p/hsa-miR-92b-3p	hsa-miR-9-5p
STRBP	0.0835403	0.606783	0.654545	10	hsa-let-7b-5p/hsa-let-7e-5p/hsa-let-7f-5p	hsa-miR-135a-5p	hsa-miR-142-5p	hsa-miR-146a-5p	hsa-miR-205-5p	hsa-miR-26a-5p	hsa-miR-27b-3p	hsa-miR-381-3p	hsa-miR-424-5p	hsa-miR-494-3p
DDI2	0.0846925	0.606783	0.716883	14	hsa-let-7b-5p/hsa-let-7e-5p/hsa-let-7f-5p	hsa-miR-128-3p/hsa-miR-128-3p/hsa-miR-216a-3p	hsa-miR-135a-5p	hsa-miR-142-5p	hsa-miR-204-5p	hsa-miR-27b-3p	hsa-miR-29a-3p/hsa-miR-29b-3p	hsa-miR-30b-5p/hsa-miR-30c-5p/hsa-miR-30d-5p	hsa-miR-371a-5p	hsa-miR-384	hsa-miR-422a	hsa-miR-501-3p	hsa-miR-92a-3p/hsa-miR-92b-3p	hsa-miR-9-5p
ANK3	0.0852176	0.606783	0.67438	11	hsa-miR-135a-5p	hsa-miR-186-5p/hsa-miR-186-5p	hsa-miR-27b-3p	hsa-miR-29a-3p/hsa-miR-29b-3p	hsa-miR-34a-5p/hsa-miR-34c-5p/hsa-miR-449a/hsa-miR-449b-5p	hsa-miR-374a-5p	hsa-miR-381-3p	hsa-miR-425-5p	hsa-miR-429	hsa-miR-448	hsa-miR-92a-3p/hsa-miR-92b-3p
KPNA6	0.0852176	0.606783	0.67438	11	hsa-miR-125a-5p/hsa-miR-125b-5p	hsa-miR-128-3p/hsa-miR-128-3p/hsa-miR-216a-3p	hsa-miR-146a-5p	hsa-miR-186-5p/hsa-miR-186-5p	hsa-miR-26a-5p	hsa-miR-27b-3p	hsa-miR-30b-5p/hsa-miR-30c-5p/hsa-miR-30d-5p	hsa-miR-381-3p	hsa-miR-422a	hsa-miR-425-5p	hsa-miR-7-5p
PDE3B	0.0852176	0.606783	0.67438	11	hsa-miR-128-3p/hsa-miR-128-3p/hsa-miR-216a-3p	hsa-miR-135a-5p	hsa-miR-186-5p/hsa-miR-186-5p	hsa-miR-205-5p	hsa-miR-26a-5p	hsa-miR-27b-3p	hsa-miR-424-5p	hsa-miR-425-5p	hsa-miR-501-3p	hsa-miR-92a-3p/hsa-miR-92b-3p	hsa-miR-9-5p
PHF15	0.0852176	0.606783	0.67438	11	hsa-miR-125a-5p/hsa-miR-125b-5p	hsa-miR-128-3p/hsa-miR-128-3p/hsa-miR-216a-3p	hsa-miR-27b-3p	hsa-miR-296-5p	hsa-miR-34a-5p/hsa-miR-34c-5p/hsa-miR-449a/hsa-miR-449b-5p	hsa-miR-381-3p	hsa-miR-422a	hsa-miR-424-5p	hsa-miR-494-3p	hsa-miR-92a-3p/hsa-miR-92b-3p	hsa-miR-9-5p
PLAGL2	0.0852176	0.606783	0.67438	11	hsa-let-7b-5p/hsa-let-7e-5p/hsa-let-7f-5p	hsa-miR-125a-5p/hsa-miR-125b-5p	hsa-miR-128-3p/hsa-miR-128-3p/hsa-miR-216a-3p	hsa-miR-138-5p	hsa-miR-141-3p/hsa-miR-200a-3p	hsa-miR-142-5p	hsa-miR-27b-3p	hsa-miR-302b-3p/hsa-miR-520a-3p	hsa-miR-30b-5p/hsa-miR-30c-5p/hsa-miR-30d-5p	hsa-miR-362-5p	hsa-miR-422a
TET2	0.0852176	0.606783	0.67438	11	hsa-let-7b-5p/hsa-let-7e-5p/hsa-let-7f-5p	hsa-miR-125a-5p/hsa-miR-125b-5p	hsa-miR-135a-5p	hsa-miR-138-5p	hsa-miR-204-5p	hsa-miR-26a-5p	hsa-miR-29a-3p/hsa-miR-29b-3p	hsa-miR-302b-3p/hsa-miR-520a-3p	hsa-miR-374a-5p	hsa-miR-425-5p	hsa-miR-9-5p
DCUN1D3	0.0855956	0.606783	0.704895	13	hsa-let-7b-5p/hsa-let-7e-5p/hsa-let-7f-5p	hsa-miR-135a-5p	hsa-miR-140-5p	hsa-miR-141-3p/hsa-miR-200a-3p	hsa-miR-155-5p	hsa-miR-204-5p	hsa-miR-21-5p	hsa-miR-26a-5p	hsa-miR-30b-5p/hsa-miR-30c-5p/hsa-miR-30d-5p	hsa-miR-362-3p	hsa-miR-381-3p	hsa-miR-423-5p	hsa-miR-429
CLCN5	0.0858271	0.606783	0.690909	12	hsa-let-7b-5p/hsa-let-7e-5p/hsa-let-7f-5p	hsa-miR-128-3p/hsa-miR-128-3p/hsa-miR-216a-3p	hsa-miR-141-3p/hsa-miR-200a-3p	hsa-miR-142-5p	hsa-miR-155-5p	hsa-miR-204-5p	hsa-miR-27b-3p	hsa-miR-29a-3p/hsa-miR-29b-3p	hsa-miR-381-3p	hsa-miR-424-5p	hsa-miR-448	hsa-miR-9-5p
PANK3	0.0858271	0.606783	0.690909	12	hsa-miR-135a-5p	hsa-miR-140-5p	hsa-miR-141-3p/hsa-miR-200a-3p	hsa-miR-142-5p	hsa-miR-21-5p	hsa-miR-302b-3p/hsa-miR-520a-3p	hsa-miR-30b-5p/hsa-miR-30c-5p/hsa-miR-30d-5p	hsa-miR-362-5p	hsa-miR-371a-5p	hsa-miR-448	hsa-miR-92a-3p/hsa-miR-92b-3p	hsa-miR-9-5p
ALG9	0.0899571	0.606783	0.592208	7	hsa-miR-128-3p/hsa-miR-128-3p/hsa-miR-216a-3p	hsa-miR-27b-3p	hsa-miR-302b-3p/hsa-miR-520a-3p	hsa-miR-30b-5p/hsa-miR-30c-5p/hsa-miR-30d-5p	hsa-miR-425-5p	hsa-miR-7-5p	hsa-miR-9-5p
DPP8	0.0899571	0.606783	0.592208	7	hsa-miR-28-3p	hsa-miR-302b-3p/hsa-miR-520a-3p	hsa-miR-362-5p	hsa-miR-381-3p	hsa-miR-424-5p	hsa-miR-7-5p	hsa-miR-92a-3p/hsa-miR-92b-3p
ERG	0.0899571	0.606783	0.592208	7	hsa-miR-128-3p/hsa-miR-128-3p/hsa-miR-216a-3p	hsa-miR-141-3p/hsa-miR-200a-3p	hsa-miR-21-5p	hsa-miR-27b-3p	hsa-miR-30b-5p/hsa-miR-30c-5p/hsa-miR-30d-5p	hsa-miR-429	hsa-miR-9-5p
FOXJ3	0.0899571	0.606783	0.592208	7	hsa-miR-141-3p/hsa-miR-200a-3p	hsa-miR-26a-5p	hsa-miR-302b-3p/hsa-miR-520a-3p	hsa-miR-381-3p	hsa-miR-425-5p	hsa-miR-448	hsa-miR-494-3p
HOXD11	0.0899571	0.606783	0.592208	7	hsa-miR-138-5p	hsa-miR-142-5p	hsa-miR-216b-5p	hsa-miR-28-3p	hsa-miR-30b-5p/hsa-miR-30c-5p/hsa-miR-30d-5p	hsa-miR-374a-5p	hsa-miR-92a-3p/hsa-miR-92b-3p
IQSEC2	0.0899571	0.606783	0.592208	7	hsa-miR-135a-5p	hsa-miR-138-5p	hsa-miR-302b-3p/hsa-miR-520a-3p	hsa-miR-374a-5p	hsa-miR-381-3p	hsa-miR-422a	hsa-miR-429
ITGA6	0.0899571	0.606783	0.592208	7	hsa-miR-186-5p/hsa-miR-186-5p	hsa-miR-26a-5p	hsa-miR-29a-3p/hsa-miR-29b-3p	hsa-miR-30b-5p/hsa-miR-30c-5p/hsa-miR-30d-5p	hsa-miR-381-3p	hsa-miR-92a-3p/hsa-miR-92b-3p	hsa-miR-9-5p
ITPRIPL2	0.0899571	0.606783	0.592208	7	hsa-miR-141-3p/hsa-miR-200a-3p	hsa-miR-216b-5p	hsa-miR-302b-3p/hsa-miR-520a-3p	hsa-miR-424-5p	hsa-miR-448	hsa-miR-92a-3p/hsa-miR-92b-3p	hsa-miR-9-5p
MTSS1L	0.0899571	0.606783	0.592208	7	hsa-miR-128-3p/hsa-miR-128-3p/hsa-miR-216a-3p	hsa-miR-142-5p	hsa-miR-186-5p/hsa-miR-186-5p	hsa-miR-27b-3p	hsa-miR-29a-3p/hsa-miR-29b-3p	hsa-miR-362-3p	hsa-miR-429
NHS	0.0899571	0.606783	0.592208	7	hsa-miR-128-3p/hsa-miR-128-3p/hsa-miR-216a-3p	hsa-miR-21-5p	hsa-miR-216a-5p	hsa-miR-26a-5p	hsa-miR-27b-3p	hsa-miR-30b-5p/hsa-miR-30c-5p/hsa-miR-30d-5p	hsa-miR-381-3p
POU6F2	0.0899571	0.606783	0.592208	7	hsa-let-7b-5p/hsa-let-7e-5p/hsa-let-7f-5p	hsa-miR-135a-5p	hsa-miR-371a-5p	hsa-miR-384	hsa-miR-448	hsa-miR-455-5p	hsa-miR-9-5p
PRKAB2	0.0899571	0.606783	0.592208	7	hsa-let-7b-5p/hsa-let-7e-5p/hsa-let-7f-5p	hsa-miR-216b-5p	hsa-miR-29a-3p/hsa-miR-29b-3p	hsa-miR-424-5p	hsa-miR-448	hsa-miR-494-3p	hsa-miR-92a-3p/hsa-miR-92b-3p
SIK1	0.0899571	0.606783	0.592208	7	hsa-miR-128-3p/hsa-miR-128-3p/hsa-miR-216a-3p	hsa-miR-141-3p/hsa-miR-200a-3p	hsa-miR-27b-3p	hsa-miR-302b-3p/hsa-miR-520a-3p	hsa-miR-424-5p	hsa-miR-92a-3p/hsa-miR-92b-3p	hsa-miR-9-5p
TMEM167A	0.0899571	0.606783	0.592208	7	hsa-let-7b-5p/hsa-let-7e-5p/hsa-let-7f-5p	hsa-miR-128-3p/hsa-miR-128-3p/hsa-miR-216a-3p	hsa-miR-186-5p/hsa-miR-186-5p	hsa-miR-27b-3p	hsa-miR-302b-3p/hsa-miR-520a-3p	hsa-miR-384	hsa-miR-455-5p
WDTC1	0.0899571	0.606783	0.592208	7	hsa-miR-128-3p/hsa-miR-128-3p/hsa-miR-216a-3p	hsa-miR-205-5p	hsa-miR-27b-3p	hsa-miR-296-5p	hsa-miR-424-5p	hsa-miR-7-5p	hsa-miR-9-5p
ZC3H12B	0.0899571	0.606783	0.592208	7	hsa-miR-125a-5p/hsa-miR-125b-5p	hsa-miR-128-3p/hsa-miR-128-3p/hsa-miR-216a-3p	hsa-miR-155-5p	hsa-miR-27b-3p	hsa-miR-34a-5p/hsa-miR-34c-5p/hsa-miR-449a/hsa-miR-449b-5p	hsa-miR-424-5p	hsa-miR-494-3p
ZMYM4	0.0899571	0.606783	0.592208	7	hsa-miR-128-3p/hsa-miR-128-3p/hsa-miR-216a-3p	hsa-miR-27b-3p	hsa-miR-34a-5p/hsa-miR-34c-5p/hsa-miR-449a/hsa-miR-449b-5p	hsa-miR-381-3p	hsa-miR-423-5p	hsa-miR-429	hsa-miR-501-3p
ZNF385A	0.0899571	0.606783	0.592208	7	hsa-miR-125a-5p/hsa-miR-125b-5p	hsa-miR-128-3p/hsa-miR-128-3p/hsa-miR-216a-3p	hsa-miR-135a-5p	hsa-miR-138-5p	hsa-miR-186-5p/hsa-miR-186-5p	hsa-miR-27b-3p	hsa-miR-302b-3p/hsa-miR-520a-3p
ZNF831	0.0899571	0.606783	0.592208	7	hsa-miR-135a-5p	hsa-miR-142-5p	hsa-miR-186-5p/hsa-miR-186-5p	hsa-miR-30b-5p/hsa-miR-30c-5p/hsa-miR-30d-5p	hsa-miR-362-5p	hsa-miR-424-5p	hsa-miR-425-5p
ARX	0.0931983	0.606783	0.523636	5	hsa-miR-128-3p/hsa-miR-128-3p/hsa-miR-216a-3p	hsa-miR-204-5p	hsa-miR-27b-3p	hsa-miR-302b-3p/hsa-miR-520a-3p	hsa-miR-9-5p
ASF1A	0.0931983	0.606783	0.523636	5	hsa-miR-135a-5p	hsa-miR-21-5p	hsa-miR-27b-3p	hsa-miR-302b-3p/hsa-miR-520a-3p	hsa-miR-429
ATMIN	0.0931983	0.606783	0.523636	5	hsa-miR-34a-5p/hsa-miR-34c-5p/hsa-miR-449a/hsa-miR-449b-5p	hsa-miR-362-5p	hsa-miR-374a-5p	hsa-miR-429	hsa-miR-92a-3p/hsa-miR-92b-3p
BVES	0.0931983	0.606783	0.523636	5	hsa-miR-138-5p	hsa-miR-142-5p	hsa-miR-29a-3p/hsa-miR-29b-3p	hsa-miR-302b-3p/hsa-miR-520a-3p	hsa-miR-371a-5p
CALD1	0.0931983	0.606783	0.523636	5	hsa-miR-151a-3p	hsa-miR-27b-3p	hsa-miR-30b-5p/hsa-miR-30c-5p/hsa-miR-30d-5p	hsa-miR-374a-5p	hsa-miR-501-3p
CBX3	0.0931983	0.606783	0.523636	5	hsa-miR-142-5p	hsa-miR-29a-3p/hsa-miR-29b-3p	hsa-miR-30b-5p/hsa-miR-30c-5p/hsa-miR-30d-5p	hsa-miR-422a	hsa-miR-494-3p
CCND1	0.0931983	0.606783	0.523636	5	hsa-let-7b-5p/hsa-let-7e-5p/hsa-let-7f-5p	hsa-miR-142-5p	hsa-miR-302b-3p/hsa-miR-520a-3p	hsa-miR-34a-5p/hsa-miR-34c-5p/hsa-miR-449a/hsa-miR-449b-5p	hsa-miR-424-5p
CCSER1	0.0931983	0.606783	0.523636	5	hsa-miR-204-5p	hsa-miR-30b-5p/hsa-miR-30c-5p/hsa-miR-30d-5p	hsa-miR-362-5p	hsa-miR-429	hsa-miR-9-5p
CDC42SE1	0.0931983	0.606783	0.523636	5	hsa-let-7b-5p/hsa-let-7e-5p/hsa-let-7f-5p	hsa-miR-125a-5p/hsa-miR-125b-5p	hsa-miR-29a-3p/hsa-miR-29b-3p	hsa-miR-371a-5p	hsa-miR-423-5p
CNTFR	0.0931983	0.606783	0.523636	5	hsa-miR-146a-5p	hsa-miR-21-5p	hsa-miR-296-5p	hsa-miR-429	hsa-miR-9-5p
DOCK11	0.0931983	0.606783	0.523636	5	hsa-miR-128-3p/hsa-miR-128-3p/hsa-miR-216a-3p	hsa-miR-155-5p	hsa-miR-26a-5p	hsa-miR-27b-3p	hsa-miR-381-3p
FAM102A	0.0931983	0.606783	0.523636	5	hsa-miR-128-3p/hsa-miR-128-3p/hsa-miR-216a-3p	hsa-miR-140-5p	hsa-miR-27b-3p	hsa-miR-302b-3p/hsa-miR-520a-3p	hsa-miR-448
FAM155A	0.0931983	0.606783	0.523636	5	hsa-let-7b-5p/hsa-let-7e-5p/hsa-let-7f-5p	hsa-miR-128-3p/hsa-miR-128-3p/hsa-miR-216a-3p	hsa-miR-142-5p	hsa-miR-205-5p	hsa-miR-30b-5p/hsa-miR-30c-5p/hsa-miR-30d-5p
FRAS1	0.0931983	0.606783	0.523636	5	hsa-let-7b-5p/hsa-let-7e-5p/hsa-let-7f-5p	hsa-miR-125a-5p/hsa-miR-125b-5p	hsa-miR-140-5p	hsa-miR-204-5p	hsa-miR-29a-3p/hsa-miR-29b-3p
GFPT2	0.0931983	0.606783	0.523636	5	hsa-miR-128-3p/hsa-miR-128-3p/hsa-miR-216a-3p	hsa-miR-27b-3p	hsa-miR-30b-5p/hsa-miR-30c-5p/hsa-miR-30d-5p	hsa-miR-448	hsa-miR-92a-3p/hsa-miR-92b-3p
GPR12	0.0931983	0.606783	0.523636	5	hsa-miR-141-3p/hsa-miR-200a-3p	hsa-miR-186-5p/hsa-miR-186-5p	hsa-miR-26a-5p	hsa-miR-302b-3p/hsa-miR-520a-3p	hsa-miR-34a-5p/hsa-miR-34c-5p/hsa-miR-449a/hsa-miR-449b-5p
HOXA11	0.0931983	0.606783	0.523636	5	hsa-miR-141-3p/hsa-miR-200a-3p	hsa-miR-30b-5p/hsa-miR-30c-5p/hsa-miR-30d-5p	hsa-miR-374a-5p	hsa-miR-448	hsa-miR-9-5p
IPO11	0.0931983	0.606783	0.523636	5	hsa-let-7b-5p/hsa-let-7e-5p/hsa-let-7f-5p	hsa-miR-296-5p	hsa-miR-34a-5p/hsa-miR-34c-5p/hsa-miR-449a/hsa-miR-449b-5p	hsa-miR-7-5p	hsa-miR-9-5p
JPH3	0.0931983	0.606783	0.523636	5	hsa-miR-186-5p/hsa-miR-186-5p	hsa-miR-204-5p	hsa-miR-34a-5p/hsa-miR-34c-5p/hsa-miR-449a/hsa-miR-449b-5p	hsa-miR-381-3p	hsa-miR-448
KBTBD2	0.0931983	0.606783	0.523636	5	hsa-miR-140-5p	hsa-miR-155-5p	hsa-miR-302b-3p/hsa-miR-520a-3p	hsa-miR-424-5p	hsa-miR-7-5p
METTL21A	0.0931983	0.606783	0.523636	5	hsa-miR-128-3p/hsa-miR-128-3p/hsa-miR-216a-3p	hsa-miR-155-5p	hsa-miR-186-5p/hsa-miR-186-5p	hsa-miR-27b-3p	hsa-miR-374a-5p
NEDD4	0.0931983	0.606783	0.523636	5	hsa-miR-128-3p/hsa-miR-128-3p/hsa-miR-216a-3p	hsa-miR-186-5p/hsa-miR-186-5p	hsa-miR-27b-3p	hsa-miR-30b-5p/hsa-miR-30c-5p/hsa-miR-30d-5p	hsa-miR-9-5p
NLGN2	0.0931983	0.606783	0.523636	5	hsa-miR-138-5p	hsa-miR-296-3p	hsa-miR-362-3p	hsa-miR-7-5p	hsa-miR-9-5p
NOG	0.0931983	0.606783	0.523636	5	hsa-miR-140-5p	hsa-miR-142-5p	hsa-miR-186-5p/hsa-miR-186-5p	hsa-miR-374a-5p	hsa-miR-429
PEX13	0.0931983	0.606783	0.523636	5	hsa-miR-216a-5p	hsa-miR-26a-5p	hsa-miR-381-3p	hsa-miR-424-5p	hsa-miR-425-5p
PHF13	0.0931983	0.606783	0.523636	5	hsa-miR-135a-5p	hsa-miR-204-5p	hsa-miR-27b-3p	hsa-miR-30b-5p/hsa-miR-30c-5p/hsa-miR-30d-5p	hsa-miR-9-5p
PI4K2B	0.0931983	0.606783	0.523636	5	hsa-let-7b-5p/hsa-let-7e-5p/hsa-let-7f-5p	hsa-miR-125a-5p/hsa-miR-125b-5p	hsa-miR-30b-5p/hsa-miR-30c-5p/hsa-miR-30d-5p	hsa-miR-424-5p	hsa-miR-429
RNF157	0.0931983	0.606783	0.523636	5	hsa-miR-204-5p	hsa-miR-205-5p	hsa-miR-30b-5p/hsa-miR-30c-5p/hsa-miR-30d-5p	hsa-miR-362-3p	hsa-miR-92a-3p/hsa-miR-92b-3p
RNF216	0.0931983	0.606783	0.523636	5	hsa-miR-186-5p/hsa-miR-186-5p	hsa-miR-28-3p	hsa-miR-302b-3p/hsa-miR-520a-3p	hsa-miR-362-3p	hsa-miR-381-3p
SDK2	0.0931983	0.606783	0.523636	5	hsa-miR-216b-5p	hsa-miR-30b-5p/hsa-miR-30c-5p/hsa-miR-30d-5p	hsa-miR-34a-5p/hsa-miR-34c-5p/hsa-miR-449a/hsa-miR-449b-5p	hsa-miR-425-5p	hsa-miR-429
SLC36A1	0.0931983	0.606783	0.523636	5	hsa-miR-142-5p	hsa-miR-29a-3p/hsa-miR-29b-3p	hsa-miR-30b-5p/hsa-miR-30c-5p/hsa-miR-30d-5p	hsa-miR-371a-5p	hsa-miR-424-5p
SLC38A4	0.0931983	0.606783	0.523636	5	hsa-miR-128-3p/hsa-miR-128-3p/hsa-miR-216a-3p	hsa-miR-27b-3p	hsa-miR-429	hsa-miR-7-5p	hsa-miR-9-5p
SMNDC1	0.0931983	0.606783	0.523636	5	hsa-miR-155-5p	hsa-miR-186-5p/hsa-miR-186-5p	hsa-miR-302b-3p/hsa-miR-520a-3p	hsa-miR-362-3p	hsa-miR-7-5p
SOWAHC	0.0931983	0.606783	0.523636	5	hsa-miR-142-5p	hsa-miR-204-5p	hsa-miR-21-5p	hsa-miR-29a-3p/hsa-miR-29b-3p	hsa-miR-424-5p
SRF	0.0931983	0.606783	0.523636	5	hsa-miR-125a-5p/hsa-miR-125b-5p	hsa-miR-142-5p	hsa-miR-296-5p	hsa-miR-429	hsa-miR-9-5p
TRIM67	0.0931983	0.606783	0.523636	5	hsa-let-7b-5p/hsa-let-7e-5p/hsa-let-7f-5p	hsa-miR-128-3p/hsa-miR-128-3p/hsa-miR-216a-3p	hsa-miR-186-5p/hsa-miR-186-5p	hsa-miR-34a-5p/hsa-miR-34c-5p/hsa-miR-449a/hsa-miR-449b-5p	hsa-miR-7-5p
TSPAN31	0.0931983	0.606783	0.523636	5	hsa-miR-135a-5p	hsa-miR-138-5p	hsa-miR-216b-5p	hsa-miR-296-5p	hsa-miR-371a-5p
VAMP1	0.0931983	0.606783	0.523636	5	hsa-miR-151a-3p	hsa-miR-26a-5p	hsa-miR-381-3p	hsa-miR-424-5p	hsa-miR-9-5p
VPS4A	0.0931983	0.606783	0.523636	5	hsa-miR-135a-5p	hsa-miR-26a-5p	hsa-miR-34a-5p/hsa-miR-34c-5p/hsa-miR-449a/hsa-miR-449b-5p	hsa-miR-424-5p	hsa-miR-7-5p
TNIK	0.0952752	0.606783	0.75	16	hsa-let-7b-5p/hsa-let-7e-5p/hsa-let-7f-5p	hsa-miR-128-3p/hsa-miR-128-3p/hsa-miR-216a-3p	hsa-miR-135a-5p	hsa-miR-138-5p	hsa-miR-141-3p/hsa-miR-200a-3p	hsa-miR-142-5p	hsa-miR-146a-5p	hsa-miR-151a-3p	hsa-miR-155-5p	hsa-miR-186-5p/hsa-miR-186-5p	hsa-miR-204-5p	hsa-miR-27b-3p	hsa-miR-302b-3p/hsa-miR-520a-3p	hsa-miR-30b-5p/hsa-miR-30c-5p/hsa-miR-30d-5p	hsa-miR-424-5p	hsa-miR-494-3p
ADAM19	0.0963068	0.606783	0.627273	8	hsa-miR-128-3p/hsa-miR-128-3p/hsa-miR-216a-3p	hsa-miR-146a-5p	hsa-miR-26a-5p	hsa-miR-27b-3p	hsa-miR-29a-3p/hsa-miR-29b-3p	hsa-miR-30b-5p/hsa-miR-30c-5p/hsa-miR-30d-5p	hsa-miR-448	hsa-miR-92a-3p/hsa-miR-92b-3p
AMER2	0.0963068	0.606783	0.627273	8	hsa-miR-125a-5p/hsa-miR-125b-5p	hsa-miR-128-3p/hsa-miR-128-3p/hsa-miR-216a-3p	hsa-miR-140-5p	hsa-miR-302b-3p/hsa-miR-520a-3p	hsa-miR-34a-5p/hsa-miR-34c-5p/hsa-miR-449a/hsa-miR-449b-5p	hsa-miR-381-3p	hsa-miR-501-3p	hsa-miR-9-5p
CERS6	0.0963068	0.606783	0.627273	8	hsa-miR-141-3p/hsa-miR-200a-3p	hsa-miR-27b-3p	hsa-miR-28-3p	hsa-miR-302b-3p/hsa-miR-520a-3p	hsa-miR-30b-5p/hsa-miR-30c-5p/hsa-miR-30d-5p	hsa-miR-34a-5p/hsa-miR-34c-5p/hsa-miR-449a/hsa-miR-449b-5p	hsa-miR-429	hsa-miR-9-5p
CNTN4	0.0963068	0.606783	0.627273	8	hsa-miR-155-5p	hsa-miR-186-5p/hsa-miR-186-5p	hsa-miR-30b-5p/hsa-miR-30c-5p/hsa-miR-30d-5p	hsa-miR-374a-5p	hsa-miR-429	hsa-miR-448	hsa-miR-92a-3p/hsa-miR-92b-3p	hsa-miR-9-5p
FAM208A	0.0963068	0.606783	0.627273	8	hsa-let-7b-5p/hsa-let-7e-5p/hsa-let-7f-5p	hsa-miR-146a-5p	hsa-miR-205-5p	hsa-miR-26a-5p	hsa-miR-34a-5p/hsa-miR-34c-5p/hsa-miR-449a/hsa-miR-449b-5p	hsa-miR-381-3p	hsa-miR-7-5p	hsa-miR-9-5p
KDM3A	0.0963068	0.606783	0.627273	8	hsa-let-7b-5p/hsa-let-7e-5p/hsa-let-7f-5p	hsa-miR-128-3p/hsa-miR-128-3p/hsa-miR-216a-3p	hsa-miR-141-3p/hsa-miR-200a-3p	hsa-miR-155-5p	hsa-miR-216a-5p	hsa-miR-27b-3p	hsa-miR-30b-5p/hsa-miR-30c-5p/hsa-miR-30d-5p	hsa-miR-371a-5p
MAPK10	0.0963068	0.606783	0.627273	8	hsa-miR-125a-5p/hsa-miR-125b-5p	hsa-miR-128-3p/hsa-miR-128-3p/hsa-miR-216a-3p	hsa-miR-135a-5p	hsa-miR-21-5p	hsa-miR-27b-3p	hsa-miR-29a-3p/hsa-miR-29b-3p	hsa-miR-494-3p	hsa-miR-7-5p
SSH1	0.0963068	0.606783	0.627273	8	hsa-let-7b-5p/hsa-let-7e-5p/hsa-let-7f-5p	hsa-miR-128-3p/hsa-miR-128-3p/hsa-miR-216a-3p	hsa-miR-135a-5p	hsa-miR-142-5p	hsa-miR-186-5p/hsa-miR-186-5p	hsa-miR-27b-3p	hsa-miR-30b-5p/hsa-miR-30c-5p/hsa-miR-30d-5p	hsa-miR-362-3p
VANGL1	0.0963068	0.606783	0.627273	8	hsa-miR-125a-5p/hsa-miR-125b-5p	hsa-miR-128-3p/hsa-miR-128-3p/hsa-miR-216a-3p	hsa-miR-138-5p	hsa-miR-142-5p	hsa-miR-27b-3p	hsa-miR-29a-3p/hsa-miR-29b-3p	hsa-miR-422a	hsa-miR-9-5p
XPR1	0.0963068	0.606783	0.627273	8	hsa-miR-128-3p/hsa-miR-128-3p/hsa-miR-216a-3p	hsa-miR-138-5p	hsa-miR-205-5p	hsa-miR-26a-5p	hsa-miR-30b-5p/hsa-miR-30c-5p/hsa-miR-30d-5p	hsa-miR-381-3p	hsa-miR-424-5p	hsa-miR-92a-3p/hsa-miR-92b-3p
STOX2	0.0978671	0.606783	0.741818	15	hsa-let-7b-5p/hsa-let-7e-5p/hsa-let-7f-5p	hsa-miR-125a-5p/hsa-miR-125b-5p	hsa-miR-128-3p/hsa-miR-128-3p/hsa-miR-216a-3p	hsa-miR-138-5p	hsa-miR-140-5p	hsa-miR-142-5p	hsa-miR-186-5p/hsa-miR-186-5p	hsa-miR-204-5p	hsa-miR-26a-5p	hsa-miR-27b-3p	hsa-miR-302b-3p/hsa-miR-520a-3p	hsa-miR-30b-5p/hsa-miR-30c-5p/hsa-miR-30d-5p	hsa-miR-381-3p	hsa-miR-424-5p	hsa-miR-7-5p
ELAVL2	0.100051	0.606783	0.732468	14	hsa-miR-128-3p/hsa-miR-128-3p/hsa-miR-216a-3p	hsa-miR-140-5p	hsa-miR-141-3p/hsa-miR-200a-3p	hsa-miR-142-5p	hsa-miR-155-5p	hsa-miR-204-5p	hsa-miR-216a-5p	hsa-miR-26a-5p	hsa-miR-27b-3p	hsa-miR-302b-3p/hsa-miR-520a-3p	hsa-miR-30b-5p/hsa-miR-30c-5p/hsa-miR-30d-5p	hsa-miR-429	hsa-miR-501-3p	hsa-miR-9-5p
AGO4	0.100189	0.606783	0.654545	9	hsa-let-7b-5p/hsa-let-7e-5p/hsa-let-7f-5p	hsa-miR-125a-5p/hsa-miR-125b-5p	hsa-miR-138-5p	hsa-miR-155-5p	hsa-miR-21-5p	hsa-miR-30b-5p/hsa-miR-30c-5p/hsa-miR-30d-5p	hsa-miR-34a-5p/hsa-miR-34c-5p/hsa-miR-449a/hsa-miR-449b-5p	hsa-miR-424-5p	hsa-miR-494-3p
CORO1C	0.100189	0.606783	0.654545	9	hsa-miR-125a-5p/hsa-miR-125b-5p	hsa-miR-128-3p/hsa-miR-128-3p/hsa-miR-216a-3p	hsa-miR-141-3p/hsa-miR-200a-3p	hsa-miR-204-5p	hsa-miR-26a-5p	hsa-miR-34a-5p/hsa-miR-34c-5p/hsa-miR-449a/hsa-miR-449b-5p	hsa-miR-374a-5p	hsa-miR-381-3p	hsa-miR-429
GDF11	0.100189	0.606783	0.654545	9	hsa-miR-125a-5p/hsa-miR-125b-5p	hsa-miR-128-3p/hsa-miR-128-3p/hsa-miR-216a-3p	hsa-miR-142-5p	hsa-miR-26a-5p	hsa-miR-302b-3p/hsa-miR-520a-3p	hsa-miR-381-3p	hsa-miR-423-5p	hsa-miR-92a-3p/hsa-miR-92b-3p	hsa-miR-9-5p
GRSF1	0.100189	0.606783	0.654545	9	hsa-miR-125a-5p/hsa-miR-125b-5p	hsa-miR-142-5p	hsa-miR-146a-5p	hsa-miR-155-5p	hsa-miR-26a-5p	hsa-miR-27b-3p	hsa-miR-384	hsa-miR-422a	hsa-miR-9-5p
SLC24A4	0.100189	0.606783	0.654545	9	hsa-miR-128-3p/hsa-miR-128-3p/hsa-miR-216a-3p	hsa-miR-216a-5p	hsa-miR-216b-5p	hsa-miR-26a-5p	hsa-miR-27b-3p	hsa-miR-29a-3p/hsa-miR-29b-3p	hsa-miR-423-5p	hsa-miR-429	hsa-miR-92a-3p/hsa-miR-92b-3p
XIAP	0.101732	0.606783	0.721678	13	hsa-miR-141-3p/hsa-miR-200a-3p	hsa-miR-142-5p	hsa-miR-146a-5p	hsa-miR-155-5p	hsa-miR-186-5p/hsa-miR-186-5p	hsa-miR-216a-5p	hsa-miR-216b-5p	hsa-miR-27b-3p	hsa-miR-371a-5p	hsa-miR-381-3p	hsa-miR-429	hsa-miR-494-3p	hsa-miR-7-5p
BTBD7	0.102284	0.606783	0.676364	10	hsa-miR-142-5p	hsa-miR-204-5p	hsa-miR-26a-5p	hsa-miR-29a-3p/hsa-miR-29b-3p	hsa-miR-302b-3p/hsa-miR-520a-3p	hsa-miR-30b-5p/hsa-miR-30c-5p/hsa-miR-30d-5p	hsa-miR-374a-5p	hsa-miR-381-3p	hsa-miR-448	hsa-miR-9-5p
CPD	0.102284	0.606783	0.676364	10	hsa-let-7b-5p/hsa-let-7e-5p/hsa-let-7f-5p	hsa-miR-128-3p/hsa-miR-128-3p/hsa-miR-216a-3p	hsa-miR-135a-5p	hsa-miR-141-3p/hsa-miR-200a-3p	hsa-miR-186-5p/hsa-miR-186-5p	hsa-miR-204-5p	hsa-miR-27b-3p	hsa-miR-34a-5p/hsa-miR-34c-5p/hsa-miR-449a/hsa-miR-449b-5p	hsa-miR-384	hsa-miR-424-5p
PIK3CB	0.102284	0.606783	0.676364	10	hsa-miR-146a-5p	hsa-miR-204-5p	hsa-miR-26a-5p	hsa-miR-29a-3p/hsa-miR-29b-3p	hsa-miR-362-5p	hsa-miR-429	hsa-miR-455-5p	hsa-miR-7-5p	hsa-miR-92a-3p/hsa-miR-92b-3p	hsa-miR-9-5p
PTP4A1	0.102284	0.606783	0.676364	10	hsa-miR-138-5p	hsa-miR-141-3p/hsa-miR-200a-3p	hsa-miR-142-5p	hsa-miR-205-5p	hsa-miR-216a-5p	hsa-miR-26a-5p	hsa-miR-29a-3p/hsa-miR-29b-3p	hsa-miR-30b-5p/hsa-miR-30c-5p/hsa-miR-30d-5p	hsa-miR-381-3p	hsa-miR-429
RAP2C	0.102284	0.606783	0.676364	10	hsa-miR-141-3p/hsa-miR-200a-3p	hsa-miR-204-5p	hsa-miR-26a-5p	hsa-miR-30b-5p/hsa-miR-30c-5p/hsa-miR-30d-5p	hsa-miR-381-3p	hsa-miR-423-3p	hsa-miR-424-5p	hsa-miR-429	hsa-miR-448	hsa-miR-9-5p
ADAMTS5	0.102784	0.606783	0.709091	12	hsa-let-7b-5p/hsa-let-7e-5p/hsa-let-7f-5p	hsa-miR-128-3p/hsa-miR-128-3p/hsa-miR-216a-3p	hsa-miR-138-5p	hsa-miR-140-5p	hsa-miR-142-5p	hsa-miR-204-5p	hsa-miR-27b-3p	hsa-miR-29a-3p/hsa-miR-29b-3p	hsa-miR-30b-5p/hsa-miR-30c-5p/hsa-miR-30d-5p	hsa-miR-374a-5p	hsa-miR-424-5p	hsa-miR-9-5p
AKT3	0.102784	0.606783	0.709091	12	hsa-miR-125a-5p/hsa-miR-125b-5p	hsa-miR-135a-5p	hsa-miR-151a-3p	hsa-miR-186-5p/hsa-miR-186-5p	hsa-miR-28-3p	hsa-miR-29a-3p/hsa-miR-29b-3p	hsa-miR-362-5p	hsa-miR-374a-5p	hsa-miR-424-5p	hsa-miR-448	hsa-miR-494-3p	hsa-miR-7-5p
BMPR1A	0.102784	0.606783	0.709091	12	hsa-let-7b-5p/hsa-let-7e-5p/hsa-let-7f-5p	hsa-miR-135a-5p	hsa-miR-142-5p	hsa-miR-146a-5p	hsa-miR-186-5p/hsa-miR-186-5p	hsa-miR-204-5p	hsa-miR-216a-5p	hsa-miR-27b-3p	hsa-miR-381-3p	hsa-miR-424-5p	hsa-miR-494-3p	hsa-miR-92a-3p/hsa-miR-92b-3p
FXR1	0.102784	0.606783	0.709091	12	hsa-miR-140-5p	hsa-miR-151a-3p	hsa-miR-155-5p	hsa-miR-186-5p/hsa-miR-186-5p	hsa-miR-30b-5p/hsa-miR-30c-5p/hsa-miR-30d-5p	hsa-miR-384	hsa-miR-429	hsa-miR-448	hsa-miR-501-3p	hsa-miR-7-5p	hsa-miR-92a-3p/hsa-miR-92b-3p	hsa-miR-9-5p
RSF1	0.102784	0.606783	0.709091	12	hsa-let-7b-5p/hsa-let-7e-5p/hsa-let-7f-5p	hsa-miR-135a-5p	hsa-miR-138-5p	hsa-miR-142-5p	hsa-miR-27b-3p	hsa-miR-296-5p	hsa-miR-302b-3p/hsa-miR-520a-3p	hsa-miR-30b-5p/hsa-miR-30c-5p/hsa-miR-30d-5p	hsa-miR-374a-5p	hsa-miR-381-3p	hsa-miR-424-5p	hsa-miR-425-5p
ZFP36L2	0.102784	0.606783	0.709091	12	hsa-miR-128-3p/hsa-miR-128-3p/hsa-miR-216a-3p	hsa-miR-138-5p	hsa-miR-155-5p	hsa-miR-186-5p/hsa-miR-186-5p	hsa-miR-21-5p	hsa-miR-216b-5p	hsa-miR-26a-5p	hsa-miR-27b-3p	hsa-miR-302b-3p/hsa-miR-520a-3p	hsa-miR-30b-5p/hsa-miR-30c-5p/hsa-miR-30d-5p	hsa-miR-371a-5p	hsa-miR-422a
BEND4	0.103043	0.606783	0.694215	11	hsa-let-7b-5p/hsa-let-7e-5p/hsa-let-7f-5p	hsa-miR-128-3p/hsa-miR-128-3p/hsa-miR-216a-3p	hsa-miR-141-3p/hsa-miR-200a-3p	hsa-miR-146a-5p	hsa-miR-205-5p	hsa-miR-27b-3p	hsa-miR-30b-5p/hsa-miR-30c-5p/hsa-miR-30d-5p	hsa-miR-374a-5p	hsa-miR-448	hsa-miR-455-5p	hsa-miR-9-5p
FBXO33	0.103043	0.606783	0.694215	11	hsa-miR-128-3p/hsa-miR-128-3p/hsa-miR-216a-3p	hsa-miR-155-5p	hsa-miR-216a-5p	hsa-miR-27b-3p	hsa-miR-424-5p	hsa-miR-429	hsa-miR-448	hsa-miR-451a	hsa-miR-455-5p	hsa-miR-92a-3p/hsa-miR-92b-3p	hsa-miR-9-5p
UBE2K	0.103043	0.606783	0.694215	11	hsa-miR-128-3p/hsa-miR-128-3p/hsa-miR-216a-3p	hsa-miR-186-5p/hsa-miR-186-5p	hsa-miR-26a-5p	hsa-miR-27b-3p	hsa-miR-29a-3p/hsa-miR-29b-3p	hsa-miR-30b-5p/hsa-miR-30c-5p/hsa-miR-30d-5p	hsa-miR-424-5p	hsa-miR-448	hsa-miR-455-5p	hsa-miR-494-3p	hsa-miR-7-5p
WNK3	0.103043	0.606783	0.694215	11	hsa-let-7b-5p/hsa-let-7e-5p/hsa-let-7f-5p	hsa-miR-128-3p/hsa-miR-128-3p/hsa-miR-216a-3p	hsa-miR-155-5p	hsa-miR-186-5p/hsa-miR-186-5p	hsa-miR-21-5p	hsa-miR-26a-5p	hsa-miR-27b-3p	hsa-miR-30b-5p/hsa-miR-30c-5p/hsa-miR-30d-5p	hsa-miR-424-5p	hsa-miR-429	hsa-miR-448
ADAM12	0.106831	0.606783	0.581818	6	hsa-miR-135a-5p	hsa-miR-142-5p	hsa-miR-26a-5p	hsa-miR-29a-3p/hsa-miR-29b-3p	hsa-miR-30b-5p/hsa-miR-30c-5p/hsa-miR-30d-5p	hsa-miR-501-3p
ARHGAP24	0.106831	0.606783	0.581818	6	hsa-miR-141-3p/hsa-miR-200a-3p	hsa-miR-205-5p	hsa-miR-21-5p	hsa-miR-302b-3p/hsa-miR-520a-3p	hsa-miR-381-3p	hsa-miR-9-5p
ATP7A	0.106831	0.606783	0.581818	6	hsa-miR-142-5p	hsa-miR-205-5p	hsa-miR-362-5p	hsa-miR-424-5p	hsa-miR-92a-3p/hsa-miR-92b-3p	hsa-miR-9-5p
CCNYL1	0.106831	0.606783	0.581818	6	hsa-miR-138-5p	hsa-miR-140-5p	hsa-miR-27b-3p	hsa-miR-29a-3p/hsa-miR-29b-3p	hsa-miR-424-5p	hsa-miR-429
CXXC4	0.106831	0.606783	0.581818	6	hsa-miR-141-3p/hsa-miR-200a-3p	hsa-miR-216a-5p	hsa-miR-216b-5p	hsa-miR-381-3p	hsa-miR-494-3p	hsa-miR-92a-3p/hsa-miR-92b-3p
DAGLA	0.106831	0.606783	0.581818	6	hsa-let-7b-5p/hsa-let-7e-5p/hsa-let-7f-5p	hsa-miR-125a-5p/hsa-miR-125b-5p	hsa-miR-30b-5p/hsa-miR-30c-5p/hsa-miR-30d-5p	hsa-miR-34a-5p/hsa-miR-34c-5p/hsa-miR-449a/hsa-miR-449b-5p	hsa-miR-381-3p	hsa-miR-448
DENND2C	0.106831	0.606783	0.581818	6	hsa-miR-29a-3p/hsa-miR-29b-3p	hsa-miR-30b-5p/hsa-miR-30c-5p/hsa-miR-30d-5p	hsa-miR-381-3p	hsa-miR-424-5p	hsa-miR-429	hsa-miR-9-5p
GLTSCR1L	0.106831	0.606783	0.581818	6	hsa-miR-216a-5p	hsa-miR-216b-5p	hsa-miR-26a-5p	hsa-miR-302b-3p/hsa-miR-520a-3p	hsa-miR-92a-3p/hsa-miR-92b-3p	hsa-miR-9-5p
GPATCH2L	0.106831	0.606783	0.581818	6	hsa-miR-128-3p/hsa-miR-128-3p/hsa-miR-216a-3p	hsa-miR-142-5p	hsa-miR-186-5p/hsa-miR-186-5p	hsa-miR-205-5p	hsa-miR-27b-3p	hsa-miR-425-5p
HOXC8	0.106831	0.606783	0.581818	6	hsa-miR-204-5p	hsa-miR-371a-5p	hsa-miR-381-3p	hsa-miR-424-5p	hsa-miR-448	hsa-miR-92a-3p/hsa-miR-92b-3p
INSR	0.106831	0.606783	0.581818	6	hsa-let-7b-5p/hsa-let-7e-5p/hsa-let-7f-5p	hsa-miR-128-3p/hsa-miR-128-3p/hsa-miR-216a-3p	hsa-miR-151a-3p	hsa-miR-205-5p	hsa-miR-27b-3p	hsa-miR-424-5p
LOX	0.106831	0.606783	0.581818	6	hsa-miR-128-3p/hsa-miR-128-3p/hsa-miR-216a-3p	hsa-miR-186-5p/hsa-miR-186-5p	hsa-miR-27b-3p	hsa-miR-29a-3p/hsa-miR-29b-3p	hsa-miR-30b-5p/hsa-miR-30c-5p/hsa-miR-30d-5p	hsa-miR-429
MAP4K4	0.106831	0.606783	0.581818	6	hsa-let-7b-5p/hsa-let-7e-5p/hsa-let-7f-5p	hsa-miR-141-3p/hsa-miR-200a-3p	hsa-miR-29a-3p/hsa-miR-29b-3p	hsa-miR-30b-5p/hsa-miR-30c-5p/hsa-miR-30d-5p	hsa-miR-34a-5p/hsa-miR-34c-5p/hsa-miR-449a/hsa-miR-449b-5p	hsa-miR-429
MMAB	0.106831	0.606783	0.581818	6	hsa-miR-138-5p	hsa-miR-186-5p/hsa-miR-186-5p	hsa-miR-205-5p	hsa-miR-34a-5p/hsa-miR-34c-5p/hsa-miR-449a/hsa-miR-449b-5p	hsa-miR-381-3p	hsa-miR-424-5p
MN1	0.106831	0.606783	0.581818	6	hsa-miR-128-3p/hsa-miR-128-3p/hsa-miR-216a-3p	hsa-miR-141-3p/hsa-miR-200a-3p	hsa-miR-27b-3p	hsa-miR-371a-5p	hsa-miR-381-3p	hsa-miR-424-5p
PLA2G15	0.106831	0.606783	0.581818	6	hsa-let-7b-5p/hsa-let-7e-5p/hsa-let-7f-5p	hsa-miR-128-3p/hsa-miR-128-3p/hsa-miR-216a-3p	hsa-miR-27b-3p	hsa-miR-34a-5p/hsa-miR-34c-5p/hsa-miR-449a/hsa-miR-449b-5p	hsa-miR-424-5p	hsa-miR-7-5p
PPP1R15B	0.106831	0.606783	0.581818	6	hsa-let-7b-5p/hsa-let-7e-5p/hsa-let-7f-5p	hsa-miR-141-3p/hsa-miR-200a-3p	hsa-miR-186-5p/hsa-miR-186-5p	hsa-miR-205-5p	hsa-miR-26a-5p	hsa-miR-29a-3p/hsa-miR-29b-3p
PRMT6	0.106831	0.606783	0.581818	6	hsa-miR-204-5p	hsa-miR-205-5p	hsa-miR-29a-3p/hsa-miR-29b-3p	hsa-miR-302b-3p/hsa-miR-520a-3p	hsa-miR-381-3p	hsa-miR-494-3p
RASSF3	0.106831	0.606783	0.581818	6	hsa-miR-125a-5p/hsa-miR-125b-5p	hsa-miR-26a-5p	hsa-miR-27b-3p	hsa-miR-455-5p	hsa-miR-92a-3p/hsa-miR-92b-3p	hsa-miR-9-5p
SCN3B	0.106831	0.606783	0.581818	6	hsa-miR-128-3p/hsa-miR-128-3p/hsa-miR-216a-3p	hsa-miR-138-5p	hsa-miR-146a-5p	hsa-miR-27b-3p	hsa-miR-29a-3p/hsa-miR-29b-3p	hsa-miR-429
SCRT2	0.106831	0.606783	0.581818	6	hsa-let-7b-5p/hsa-let-7e-5p/hsa-let-7f-5p	hsa-miR-125a-5p/hsa-miR-125b-5p	hsa-miR-204-5p	hsa-miR-302b-3p/hsa-miR-520a-3p	hsa-miR-429	hsa-miR-448
SLC38A1	0.106831	0.606783	0.581818	6	hsa-miR-138-5p	hsa-miR-26a-5p	hsa-miR-302b-3p/hsa-miR-520a-3p	hsa-miR-30b-5p/hsa-miR-30c-5p/hsa-miR-30d-5p	hsa-miR-381-3p	hsa-miR-422a
SLIT2	0.106831	0.606783	0.581818	6	hsa-miR-128-3p/hsa-miR-128-3p/hsa-miR-216a-3p	hsa-miR-27b-3p	hsa-miR-362-3p	hsa-miR-424-5p	hsa-miR-429	hsa-miR-494-3p
STK24	0.106831	0.606783	0.581818	6	hsa-let-7b-5p/hsa-let-7e-5p/hsa-let-7f-5p	hsa-miR-128-3p/hsa-miR-128-3p/hsa-miR-216a-3p	hsa-miR-381-3p	hsa-miR-423-5p	hsa-miR-455-5p	hsa-miR-501-3p
SYT7	0.106831	0.606783	0.581818	6	hsa-let-7b-5p/hsa-let-7e-5p/hsa-let-7f-5p	hsa-miR-125a-5p/hsa-miR-125b-5p	hsa-miR-142-5p	hsa-miR-186-5p/hsa-miR-186-5p	hsa-miR-29a-3p/hsa-miR-29b-3p	hsa-miR-384
TAB2	0.106831	0.606783	0.581818	6	hsa-let-7b-5p/hsa-let-7e-5p/hsa-let-7f-5p	hsa-miR-141-3p/hsa-miR-200a-3p	hsa-miR-155-5p	hsa-miR-26a-5p	hsa-miR-27b-3p	hsa-miR-7-5p
TADA2B	0.106831	0.606783	0.581818	6	hsa-miR-125a-5p/hsa-miR-125b-5p	hsa-miR-155-5p	hsa-miR-29a-3p/hsa-miR-29b-3p	hsa-miR-30b-5p/hsa-miR-30c-5p/hsa-miR-30d-5p	hsa-miR-424-5p	hsa-miR-7-5p
ZBTB47	0.106831	0.606783	0.581818	6	hsa-miR-125a-5p/hsa-miR-125b-5p	hsa-miR-138-5p	hsa-miR-142-5p	hsa-miR-21-5p	hsa-miR-29a-3p/hsa-miR-29b-3p	hsa-miR-302b-3p/hsa-miR-520a-3p
ZDHHC5	0.106831	0.606783	0.581818	6	hsa-miR-29a-3p/hsa-miR-29b-3p	hsa-miR-362-3p	hsa-miR-374a-5p	hsa-miR-423-5p	hsa-miR-92a-3p/hsa-miR-92b-3p	hsa-miR-9-5p
ZSCAN29	0.106831	0.606783	0.581818	6	hsa-miR-125a-5p/hsa-miR-125b-5p	hsa-miR-146a-5p	hsa-miR-30b-5p/hsa-miR-30c-5p/hsa-miR-30d-5p	hsa-miR-34a-5p/hsa-miR-34c-5p/hsa-miR-449a/hsa-miR-449b-5p	hsa-miR-425-5p	hsa-miR-7-5p
CREB1	0.107023	0.606783	0.770053	17	hsa-miR-125a-5p/hsa-miR-125b-5p	hsa-miR-128-3p/hsa-miR-128-3p/hsa-miR-216a-3p	hsa-miR-138-5p	hsa-miR-140-5p	hsa-miR-155-5p	hsa-miR-204-5p	hsa-miR-205-5p	hsa-miR-26a-5p	hsa-miR-27b-3p	hsa-miR-30b-5p/hsa-miR-30c-5p/hsa-miR-30d-5p	hsa-miR-362-5p	hsa-miR-374a-5p	hsa-miR-381-3p	hsa-miR-384	hsa-miR-425-5p	hsa-miR-429	hsa-miR-92a-3p/hsa-miR-92b-3p
ATP11C	0.107091	0.606783	0.490909	4	hsa-miR-138-5p	hsa-miR-26a-5p	hsa-miR-27b-3p	hsa-miR-429
BCAP29	0.107091	0.606783	0.490909	4	hsa-let-7b-5p/hsa-let-7e-5p/hsa-let-7f-5p	hsa-miR-141-3p/hsa-miR-200a-3p	hsa-miR-204-5p	hsa-miR-494-3p
BRD1	0.107091	0.606783	0.490909	4	hsa-miR-142-5p	hsa-miR-155-5p	hsa-miR-30b-5p/hsa-miR-30c-5p/hsa-miR-30d-5p	hsa-miR-455-5p
BTBD10	0.107091	0.606783	0.490909	4	hsa-miR-135a-5p	hsa-miR-142-5p	hsa-miR-30b-5p/hsa-miR-30c-5p/hsa-miR-30d-5p	hsa-miR-9-5p
C4orf29	0.107091	0.606783	0.490909	4	hsa-miR-141-3p/hsa-miR-200a-3p	hsa-miR-29a-3p/hsa-miR-29b-3p	hsa-miR-371a-5p	hsa-miR-494-3p
C8orf4	0.107091	0.606783	0.490909	4	hsa-miR-128-3p/hsa-miR-128-3p/hsa-miR-216a-3p	hsa-miR-155-5p	hsa-miR-27b-3p	hsa-miR-30b-5p/hsa-miR-30c-5p/hsa-miR-30d-5p
CDH5	0.107091	0.606783	0.490909	4	hsa-miR-125a-5p/hsa-miR-125b-5p	hsa-miR-128-3p/hsa-miR-128-3p/hsa-miR-216a-3p	hsa-miR-27b-3p	hsa-miR-501-3p
CLIP4	0.107091	0.606783	0.490909	4	hsa-miR-204-5p	hsa-miR-302b-3p/hsa-miR-520a-3p	hsa-miR-374a-5p	hsa-miR-92a-3p/hsa-miR-92b-3p
CNEP1R1	0.107091	0.606783	0.490909	4	hsa-miR-135a-5p	hsa-miR-142-5p	hsa-miR-429	hsa-miR-92a-3p/hsa-miR-92b-3p
COL4A3	0.107091	0.606783	0.490909	4	hsa-miR-125a-5p/hsa-miR-125b-5p	hsa-miR-135a-5p	hsa-miR-29a-3p/hsa-miR-29b-3p	hsa-miR-429
DUSP8	0.107091	0.606783	0.490909	4	hsa-miR-135a-5p	hsa-miR-21-5p	hsa-miR-422a	hsa-miR-9-5p
EDAR	0.107091	0.606783	0.490909	4	hsa-miR-128-3p/hsa-miR-128-3p/hsa-miR-216a-3p	hsa-miR-27b-3p	hsa-miR-374a-5p	hsa-miR-424-5p
ELOVL7	0.107091	0.606783	0.490909	4	hsa-miR-371a-5p	hsa-miR-374a-5p	hsa-miR-381-3p	hsa-miR-7-5p
EMX1	0.107091	0.606783	0.490909	4	hsa-miR-296-5p	hsa-miR-34a-5p/hsa-miR-34c-5p/hsa-miR-449a/hsa-miR-449b-5p	hsa-miR-424-5p	hsa-miR-9-5p
ERGIC1	0.107091	0.606783	0.490909	4	hsa-let-7b-5p/hsa-let-7e-5p/hsa-let-7f-5p	hsa-miR-204-5p	hsa-miR-34a-5p/hsa-miR-34c-5p/hsa-miR-449a/hsa-miR-449b-5p	hsa-miR-362-3p
FAM105B	0.107091	0.606783	0.490909	4	hsa-miR-128-3p/hsa-miR-128-3p/hsa-miR-216a-3p	hsa-miR-27b-3p	hsa-miR-29a-3p/hsa-miR-29b-3p	hsa-miR-30b-5p/hsa-miR-30c-5p/hsa-miR-30d-5p
FAM118A	0.107091	0.606783	0.490909	4	hsa-let-7b-5p/hsa-let-7e-5p/hsa-let-7f-5p	hsa-miR-125a-5p/hsa-miR-125b-5p	hsa-miR-26a-5p	hsa-miR-9-5p
FAM135A	0.107091	0.606783	0.490909	4	hsa-let-7b-5p/hsa-let-7e-5p/hsa-let-7f-5p	hsa-miR-155-5p	hsa-miR-424-5p	hsa-miR-92a-3p/hsa-miR-92b-3p
FAM189A1	0.107091	0.606783	0.490909	4	hsa-let-7b-5p/hsa-let-7e-5p/hsa-let-7f-5p	hsa-miR-142-5p	hsa-miR-302b-3p/hsa-miR-520a-3p	hsa-miR-424-5p
G2E3	0.107091	0.606783	0.490909	4	hsa-miR-155-5p	hsa-miR-186-5p/hsa-miR-186-5p	hsa-miR-26a-5p	hsa-miR-424-5p
GJA3	0.107091	0.606783	0.490909	4	hsa-miR-128-3p/hsa-miR-128-3p/hsa-miR-216a-3p	hsa-miR-186-5p/hsa-miR-186-5p	hsa-miR-425-5p	hsa-miR-9-5p
GNAI2	0.107091	0.606783	0.490909	4	hsa-miR-138-5p	hsa-miR-30b-5p/hsa-miR-30c-5p/hsa-miR-30d-5p	hsa-miR-34a-5p/hsa-miR-34c-5p/hsa-miR-449a/hsa-miR-449b-5p	hsa-miR-384
GNPNAT1	0.107091	0.606783	0.490909	4	hsa-miR-26a-5p	hsa-miR-374a-5p	hsa-miR-494-3p	hsa-miR-9-5p
GOLGA4	0.107091	0.606783	0.490909	4	hsa-let-7b-5p/hsa-let-7e-5p/hsa-let-7f-5p	hsa-miR-30b-5p/hsa-miR-30c-5p/hsa-miR-30d-5p	hsa-miR-425-5p	hsa-miR-92a-3p/hsa-miR-92b-3p
GRB2	0.107091	0.606783	0.490909	4	hsa-miR-128-3p/hsa-miR-128-3p/hsa-miR-216a-3p	hsa-miR-141-3p/hsa-miR-200a-3p	hsa-miR-27b-3p	hsa-miR-422a
HECTD4	0.107091	0.606783	0.490909	4	hsa-let-7b-5p/hsa-let-7e-5p/hsa-let-7f-5p	hsa-miR-26a-5p	hsa-miR-374a-5p	hsa-miR-424-5p
HERC3	0.107091	0.606783	0.490909	4	hsa-miR-142-5p	hsa-miR-205-5p	hsa-miR-30b-5p/hsa-miR-30c-5p/hsa-miR-30d-5p	hsa-miR-92a-3p/hsa-miR-92b-3p
HOXC12	0.107091	0.606783	0.490909	4	hsa-miR-142-5p	hsa-miR-205-5p	hsa-miR-448	hsa-miR-92a-3p/hsa-miR-92b-3p
IGF2BP3	0.107091	0.606783	0.490909	4	hsa-let-7b-5p/hsa-let-7e-5p/hsa-let-7f-5p	hsa-miR-142-5p	hsa-miR-204-5p	hsa-miR-9-5p
INSM1	0.107091	0.606783	0.490909	4	hsa-miR-100-5p	hsa-miR-128-3p/hsa-miR-128-3p/hsa-miR-216a-3p	hsa-miR-186-5p/hsa-miR-186-5p	hsa-miR-204-5p
ITPR1	0.107091	0.606783	0.490909	4	hsa-miR-204-5p	hsa-miR-26a-5p	hsa-miR-429	hsa-miR-92a-3p/hsa-miR-92b-3p
JAK2	0.107091	0.606783	0.490909	4	hsa-miR-135a-5p	hsa-miR-204-5p	hsa-miR-216a-5p	hsa-miR-381-3p
KATNAL1	0.107091	0.606783	0.490909	4	hsa-let-7b-5p/hsa-let-7e-5p/hsa-let-7f-5p	hsa-miR-141-3p/hsa-miR-200a-3p	hsa-miR-424-5p	hsa-miR-429
KCNQ4	0.107091	0.606783	0.490909	4	hsa-let-7b-5p/hsa-let-7e-5p/hsa-let-7f-5p	hsa-miR-26a-5p	hsa-miR-429	hsa-miR-448
KIAA0319L	0.107091	0.606783	0.490909	4	hsa-miR-125a-5p/hsa-miR-125b-5p	hsa-miR-26a-5p	hsa-miR-27b-3p	hsa-miR-424-5p
KIAA1033	0.107091	0.606783	0.490909	4	hsa-miR-128-3p/hsa-miR-128-3p/hsa-miR-216a-3p	hsa-miR-135a-5p	hsa-miR-27b-3p	hsa-miR-30b-5p/hsa-miR-30c-5p/hsa-miR-30d-5p
LDLR	0.107091	0.606783	0.490909	4	hsa-miR-128-3p/hsa-miR-128-3p/hsa-miR-216a-3p	hsa-miR-140-5p	hsa-miR-27b-3p	hsa-miR-30b-5p/hsa-miR-30c-5p/hsa-miR-30d-5p
MACC1	0.107091	0.606783	0.490909	4	hsa-miR-186-5p/hsa-miR-186-5p	hsa-miR-302b-3p/hsa-miR-520a-3p	hsa-miR-424-5p	hsa-miR-494-3p
METTL21B	0.107091	0.606783	0.490909	4	hsa-miR-205-5p	hsa-miR-29a-3p/hsa-miR-29b-3p	hsa-miR-424-5p	hsa-miR-7-5p
MINPP1	0.107091	0.606783	0.490909	4	hsa-miR-128-3p/hsa-miR-128-3p/hsa-miR-216a-3p	hsa-miR-140-5p	hsa-miR-26a-5p	hsa-miR-30b-5p/hsa-miR-30c-5p/hsa-miR-30d-5p
NBR1	0.107091	0.606783	0.490909	4	hsa-miR-138-5p	hsa-miR-204-5p	hsa-miR-424-5p	hsa-miR-429
NEFM	0.107091	0.606783	0.490909	4	hsa-let-7b-5p/hsa-let-7e-5p/hsa-let-7f-5p	hsa-miR-135a-5p	hsa-miR-30b-5p/hsa-miR-30c-5p/hsa-miR-30d-5p	hsa-miR-92a-3p/hsa-miR-92b-3p
NGFR	0.107091	0.606783	0.490909	4	hsa-miR-128-3p/hsa-miR-128-3p/hsa-miR-216a-3p	hsa-miR-27b-3p	hsa-miR-296-5p	hsa-miR-423-5p
NID1	0.107091	0.606783	0.490909	4	hsa-miR-26a-5p	hsa-miR-29a-3p/hsa-miR-29b-3p	hsa-miR-30b-5p/hsa-miR-30c-5p/hsa-miR-30d-5p	hsa-miR-9-5p
POTEG	0.107091	0.606783	0.490909	4	hsa-let-7b-5p/hsa-let-7e-5p/hsa-let-7f-5p	hsa-miR-128-3p/hsa-miR-128-3p/hsa-miR-216a-3p	hsa-miR-205-5p	hsa-miR-7-5p
POTEM	0.107091	0.606783	0.490909	4	hsa-let-7b-5p/hsa-let-7e-5p/hsa-let-7f-5p	hsa-miR-128-3p/hsa-miR-128-3p/hsa-miR-216a-3p	hsa-miR-205-5p	hsa-miR-7-5p
PTPDC1	0.107091	0.606783	0.490909	4	hsa-miR-135a-5p	hsa-miR-142-5p	hsa-miR-302b-3p/hsa-miR-520a-3p	hsa-miR-30b-5p/hsa-miR-30c-5p/hsa-miR-30d-5p
RAB11FIP5	0.107091	0.606783	0.490909	4	hsa-miR-142-5p	hsa-miR-302b-3p/hsa-miR-520a-3p	hsa-miR-424-5p	hsa-miR-7-5p
RASGRF2	0.107091	0.606783	0.490909	4	hsa-miR-125a-5p/hsa-miR-125b-5p	hsa-miR-30b-5p/hsa-miR-30c-5p/hsa-miR-30d-5p	hsa-miR-448	hsa-miR-9-5p
RBPMS2	0.107091	0.606783	0.490909	4	hsa-miR-128-3p/hsa-miR-128-3p/hsa-miR-216a-3p	hsa-miR-205-5p	hsa-miR-27b-3p	hsa-miR-92a-3p/hsa-miR-92b-3p
RFX1	0.107091	0.606783	0.490909	4	hsa-miR-141-3p/hsa-miR-200a-3p	hsa-miR-381-3p	hsa-miR-92a-3p/hsa-miR-92b-3p	hsa-miR-9-5p
SACS	0.107091	0.606783	0.490909	4	hsa-miR-142-5p	hsa-miR-26a-5p	hsa-miR-30b-5p/hsa-miR-30c-5p/hsa-miR-30d-5p	hsa-miR-9-5p
SCD5	0.107091	0.606783	0.490909	4	hsa-miR-141-3p/hsa-miR-200a-3p	hsa-miR-205-5p	hsa-miR-302b-3p/hsa-miR-520a-3p	hsa-miR-494-3p
SCRN1	0.107091	0.606783	0.490909	4	hsa-miR-138-5p	hsa-miR-140-5p	hsa-miR-21-5p	hsa-miR-371a-5p
SEC61A2	0.107091	0.606783	0.490909	4	hsa-miR-155-5p	hsa-miR-204-5p	hsa-miR-30b-5p/hsa-miR-30c-5p/hsa-miR-30d-5p	hsa-miR-429
SERAC1	0.107091	0.606783	0.490909	4	hsa-miR-186-5p/hsa-miR-186-5p	hsa-miR-302b-3p/hsa-miR-520a-3p	hsa-miR-362-5p	hsa-miR-9-5p
SLC18A2	0.107091	0.606783	0.490909	4	hsa-miR-141-3p/hsa-miR-200a-3p	hsa-miR-142-5p	hsa-miR-381-3p	hsa-miR-9-5p
SLC35B3	0.107091	0.606783	0.490909	4	hsa-miR-204-5p	hsa-miR-205-5p	hsa-miR-374a-5p	hsa-miR-9-5p
SLC35D1	0.107091	0.606783	0.490909	4	hsa-miR-141-3p/hsa-miR-200a-3p	hsa-miR-186-5p/hsa-miR-186-5p	hsa-miR-216a-5p	hsa-miR-216b-5p
SLC4A5	0.107091	0.606783	0.490909	4	hsa-miR-296-5p	hsa-miR-34a-5p/hsa-miR-34c-5p/hsa-miR-449a/hsa-miR-449b-5p	hsa-miR-381-3p	hsa-miR-7-5p
STXBP5L	0.107091	0.606783	0.490909	4	hsa-miR-125a-5p/hsa-miR-125b-5p	hsa-miR-155-5p	hsa-miR-384	hsa-miR-448
SUPT6H	0.107091	0.606783	0.490909	4	hsa-miR-135a-5p	hsa-miR-141-3p/hsa-miR-200a-3p	hsa-miR-34a-5p/hsa-miR-34c-5p/hsa-miR-449a/hsa-miR-449b-5p	hsa-miR-423-5p
TBX4	0.107091	0.606783	0.490909	4	hsa-miR-125a-5p/hsa-miR-125b-5p	hsa-miR-135a-5p	hsa-miR-27b-3p	hsa-miR-374a-5p
TMC7	0.107091	0.606783	0.490909	4	hsa-let-7b-5p/hsa-let-7e-5p/hsa-let-7f-5p	hsa-miR-26a-5p	hsa-miR-374a-5p	hsa-miR-424-5p
TMEM161B	0.107091	0.606783	0.490909	4	hsa-miR-125a-5p/hsa-miR-125b-5p	hsa-miR-216a-5p	hsa-miR-374a-5p	hsa-miR-424-5p
TMEM25	0.107091	0.606783	0.490909	4	hsa-miR-128-3p/hsa-miR-128-3p/hsa-miR-216a-3p	hsa-miR-27b-3p	hsa-miR-302b-3p/hsa-miR-520a-3p	hsa-miR-34a-5p/hsa-miR-34c-5p/hsa-miR-449a/hsa-miR-449b-5p
TTC37	0.107091	0.606783	0.490909	4	hsa-miR-141-3p/hsa-miR-200a-3p	hsa-miR-186-5p/hsa-miR-186-5p	hsa-miR-374a-5p	hsa-miR-448
UBR2	0.107091	0.606783	0.490909	4	hsa-miR-186-5p/hsa-miR-186-5p	hsa-miR-216b-5p	hsa-miR-494-3p	hsa-miR-9-5p
UGT8	0.107091	0.606783	0.490909	4	hsa-miR-128-3p/hsa-miR-128-3p/hsa-miR-216a-3p	hsa-miR-26a-5p	hsa-miR-27b-3p	hsa-miR-30b-5p/hsa-miR-30c-5p/hsa-miR-30d-5p
WDR91	0.107091	0.606783	0.490909	4	hsa-miR-34a-5p/hsa-miR-34c-5p/hsa-miR-449a/hsa-miR-449b-5p	hsa-miR-381-3p	hsa-miR-423-3p	hsa-miR-429
ABAT	0.115143	0.606783	0.623377	7	hsa-miR-125a-5p/hsa-miR-125b-5p	hsa-miR-135a-5p	hsa-miR-27b-3p	hsa-miR-374a-5p	hsa-miR-429	hsa-miR-448	hsa-miR-9-5p
ACTR1A	0.115143	0.606783	0.623377	7	hsa-miR-140-5p	hsa-miR-296-5p	hsa-miR-30b-5p/hsa-miR-30c-5p/hsa-miR-30d-5p	hsa-miR-34a-5p/hsa-miR-34c-5p/hsa-miR-449a/hsa-miR-449b-5p	hsa-miR-424-5p	hsa-miR-429	hsa-miR-9-5p
ATP2A2	0.115143	0.606783	0.623377	7	hsa-let-7b-5p/hsa-let-7e-5p/hsa-let-7f-5p	hsa-miR-141-3p/hsa-miR-200a-3p	hsa-miR-151a-3p	hsa-miR-30b-5p/hsa-miR-30c-5p/hsa-miR-30d-5p	hsa-miR-381-3p	hsa-miR-429	hsa-miR-92a-3p/hsa-miR-92b-3p
BMP2	0.115143	0.606783	0.623377	7	hsa-let-7b-5p/hsa-let-7e-5p/hsa-let-7f-5p	hsa-miR-140-5p	hsa-miR-142-5p	hsa-miR-204-5p	hsa-miR-362-3p	hsa-miR-374a-5p	hsa-miR-422a
CBFB	0.115143	0.606783	0.623377	7	hsa-miR-125a-5p/hsa-miR-125b-5p	hsa-miR-128-3p/hsa-miR-128-3p/hsa-miR-216a-3p	hsa-miR-155-5p	hsa-miR-204-5p	hsa-miR-27b-3p	hsa-miR-30b-5p/hsa-miR-30c-5p/hsa-miR-30d-5p	hsa-miR-34a-5p/hsa-miR-34c-5p/hsa-miR-449a/hsa-miR-449b-5p
CLSTN2	0.115143	0.606783	0.623377	7	hsa-miR-128-3p/hsa-miR-128-3p/hsa-miR-216a-3p	hsa-miR-140-5p	hsa-miR-142-5p	hsa-miR-186-5p/hsa-miR-186-5p	hsa-miR-27b-3p	hsa-miR-371a-5p	hsa-miR-455-5p
DDX3Y	0.115143	0.606783	0.623377	7	hsa-miR-135a-5p	hsa-miR-26a-5p	hsa-miR-29a-3p/hsa-miR-29b-3p	hsa-miR-424-5p	hsa-miR-429	hsa-miR-92a-3p/hsa-miR-92b-3p	hsa-miR-9-5p
ENTPD7	0.115143	0.606783	0.623377	7	hsa-let-7b-5p/hsa-let-7e-5p/hsa-let-7f-5p	hsa-miR-135a-5p	hsa-miR-155-5p	hsa-miR-29a-3p/hsa-miR-29b-3p	hsa-miR-362-3p	hsa-miR-424-5p	hsa-miR-9-5p
GABPA	0.115143	0.606783	0.623377	7	hsa-let-7b-5p/hsa-let-7e-5p/hsa-let-7f-5p	hsa-miR-146a-5p	hsa-miR-216b-5p	hsa-miR-374a-5p	hsa-miR-424-5p	hsa-miR-429	hsa-miR-501-3p
PPP4R2	0.115143	0.606783	0.623377	7	hsa-miR-128-3p/hsa-miR-128-3p/hsa-miR-216a-3p	hsa-miR-141-3p/hsa-miR-200a-3p	hsa-miR-27b-3p	hsa-miR-34a-5p/hsa-miR-34c-5p/hsa-miR-449a/hsa-miR-449b-5p	hsa-miR-429	hsa-miR-448	hsa-miR-501-3p
RNF141	0.115143	0.606783	0.623377	7	hsa-miR-128-3p/hsa-miR-128-3p/hsa-miR-216a-3p	hsa-miR-26a-5p	hsa-miR-27b-3p	hsa-miR-29a-3p/hsa-miR-29b-3p	hsa-miR-371a-5p	hsa-miR-7-5p	hsa-miR-92a-3p/hsa-miR-92b-3p
SALL4	0.115143	0.606783	0.623377	7	hsa-let-7b-5p/hsa-let-7e-5p/hsa-let-7f-5p	hsa-miR-128-3p/hsa-miR-128-3p/hsa-miR-216a-3p	hsa-miR-205-5p	hsa-miR-27b-3p	hsa-miR-30b-5p/hsa-miR-30c-5p/hsa-miR-30d-5p	hsa-miR-424-5p	hsa-miR-9-5p
SLC9A7	0.115143	0.606783	0.623377	7	hsa-miR-128-3p/hsa-miR-128-3p/hsa-miR-216a-3p	hsa-miR-27b-3p	hsa-miR-28-3p	hsa-miR-384	hsa-miR-494-3p	hsa-miR-92a-3p/hsa-miR-92b-3p	hsa-miR-9-5p
SPATA2	0.115143	0.606783	0.623377	7	hsa-let-7b-5p/hsa-let-7e-5p/hsa-let-7f-5p	hsa-miR-128-3p/hsa-miR-128-3p/hsa-miR-216a-3p	hsa-miR-135a-5p	hsa-miR-216a-5p	hsa-miR-27b-3p	hsa-miR-429	hsa-miR-7-5p
SPOPL	0.115143	0.606783	0.623377	7	hsa-miR-128-3p/hsa-miR-128-3p/hsa-miR-216a-3p	hsa-miR-141-3p/hsa-miR-200a-3p	hsa-miR-205-5p	hsa-miR-302b-3p/hsa-miR-520a-3p	hsa-miR-374a-5p	hsa-miR-448	hsa-miR-7-5p
TIAL1	0.115143	0.606783	0.623377	7	hsa-miR-128-3p/hsa-miR-128-3p/hsa-miR-216a-3p	hsa-miR-141-3p/hsa-miR-200a-3p	hsa-miR-204-5p	hsa-miR-205-5p	hsa-miR-26a-5p	hsa-miR-381-3p	hsa-miR-429
WDFY3	0.115143	0.606783	0.623377	7	hsa-miR-140-5p	hsa-miR-141-3p/hsa-miR-200a-3p	hsa-miR-204-5p	hsa-miR-29a-3p/hsa-miR-29b-3p	hsa-miR-30b-5p/hsa-miR-30c-5p/hsa-miR-30d-5p	hsa-miR-429	hsa-miR-92a-3p/hsa-miR-92b-3p
CLOCK	0.11711	0.606783	0.748052	14	hsa-let-7b-5p/hsa-let-7e-5p/hsa-let-7f-5p	hsa-miR-138-5p	hsa-miR-141-3p/hsa-miR-200a-3p	hsa-miR-142-5p	hsa-miR-302b-3p/hsa-miR-520a-3p	hsa-miR-30b-5p/hsa-miR-30c-5p/hsa-miR-30d-5p	hsa-miR-34a-5p/hsa-miR-34c-5p/hsa-miR-449a/hsa-miR-449b-5p	hsa-miR-381-3p	hsa-miR-384	hsa-miR-424-5p	hsa-miR-429	hsa-miR-455-5p	hsa-miR-494-3p	hsa-miR-9-5p
ADCY3	0.119597	0.606783	0.436364	3	hsa-miR-128-3p/hsa-miR-128-3p/hsa-miR-216a-3p	hsa-miR-27b-3p	hsa-miR-92a-3p/hsa-miR-92b-3p
AGGF1	0.119597	0.606783	0.436364	3	hsa-miR-125a-5p/hsa-miR-125b-5p	hsa-miR-27b-3p	hsa-miR-92a-3p/hsa-miR-92b-3p
ARHGEF10	0.119597	0.606783	0.436364	3	hsa-miR-29a-3p/hsa-miR-29b-3p	hsa-miR-302b-3p/hsa-miR-520a-3p	hsa-miR-92a-3p/hsa-miR-92b-3p
ASB4	0.119597	0.606783	0.436364	3	hsa-miR-125a-5p/hsa-miR-125b-5p	hsa-miR-371a-5p	hsa-miR-374a-5p
ASXL1	0.119597	0.606783	0.436364	3	hsa-miR-141-3p/hsa-miR-200a-3p	hsa-miR-7-5p	hsa-miR-9-5p
ATP6V1B2	0.119597	0.606783	0.436364	3	hsa-miR-141-3p/hsa-miR-200a-3p	hsa-miR-424-5p	hsa-miR-92a-3p/hsa-miR-92b-3p
BMP8A	0.119597	0.606783	0.436364	3	hsa-miR-422a	hsa-miR-423-5p	hsa-miR-425-5p
BTG3	0.119597	0.606783	0.436364	3	hsa-miR-142-5p	hsa-miR-371a-5p	hsa-miR-448
BTN2A1	0.119597	0.606783	0.436364	3	hsa-miR-125a-5p/hsa-miR-125b-5p	hsa-miR-216b-5p	hsa-miR-7-5p
BTN2A2	0.119597	0.606783	0.436364	3	hsa-miR-125a-5p/hsa-miR-125b-5p	hsa-miR-216b-5p	hsa-miR-7-5p
C12orf73	0.119597	0.606783	0.436364	3	hsa-miR-27b-3p	hsa-miR-34a-5p/hsa-miR-34c-5p/hsa-miR-449a/hsa-miR-449b-5p	hsa-miR-9-5p
C2ORF15	0.119597	0.606783	0.436364	3	hsa-miR-384	hsa-miR-429	hsa-miR-9-5p
C6orf211	0.119597	0.606783	0.436364	3	hsa-let-7b-5p/hsa-let-7e-5p/hsa-let-7f-5p	hsa-miR-128-3p/hsa-miR-128-3p/hsa-miR-216a-3p	hsa-miR-27b-3p
CD226	0.119597	0.606783	0.436364	3	hsa-miR-302b-3p/hsa-miR-520a-3p	hsa-miR-30b-5p/hsa-miR-30c-5p/hsa-miR-30d-5p	hsa-miR-422a
CDC25B	0.119597	0.606783	0.436364	3	hsa-miR-141-3p/hsa-miR-200a-3p	hsa-miR-27b-3p	hsa-miR-424-5p
CERCAM	0.119597	0.606783	0.436364	3	hsa-let-7b-5p/hsa-let-7e-5p/hsa-let-7f-5p	hsa-miR-140-5p	hsa-miR-142-5p
CHKA	0.119597	0.606783	0.436364	3	hsa-miR-141-3p/hsa-miR-200a-3p	hsa-miR-27b-3p	hsa-miR-30b-5p/hsa-miR-30c-5p/hsa-miR-30d-5p
CLK4	0.119597	0.606783	0.436364	3	hsa-miR-186-5p/hsa-miR-186-5p	hsa-miR-216a-5p	hsa-miR-216b-5p
CMTR2	0.119597	0.606783	0.436364	3	hsa-miR-216b-5p	hsa-miR-302b-3p/hsa-miR-520a-3p	hsa-miR-9-5p
CPED1	0.119597	0.606783	0.436364	3	hsa-let-7b-5p/hsa-let-7e-5p/hsa-let-7f-5p	hsa-miR-26a-5p	hsa-miR-429
DCAF17	0.119597	0.606783	0.436364	3	hsa-miR-128-3p/hsa-miR-128-3p/hsa-miR-216a-3p	hsa-miR-216a-5p	hsa-miR-429
ELF4	0.119597	0.606783	0.436364	3	hsa-let-7b-5p/hsa-let-7e-5p/hsa-let-7f-5p	hsa-miR-155-5p	hsa-miR-362-3p
EPB41L4A	0.119597	0.606783	0.436364	3	hsa-miR-128-3p/hsa-miR-128-3p/hsa-miR-216a-3p	hsa-miR-27b-3p	hsa-miR-92a-3p/hsa-miR-92b-3p
EVX1	0.119597	0.606783	0.436364	3	hsa-miR-205-5p	hsa-miR-216b-5p	hsa-miR-423-5p
FNDC4	0.119597	0.606783	0.436364	3	hsa-miR-128-3p/hsa-miR-128-3p/hsa-miR-216a-3p	hsa-miR-27b-3p	hsa-miR-7-5p
GABRA5	0.119597	0.606783	0.436364	3	hsa-miR-135a-5p	hsa-miR-30b-5p/hsa-miR-30c-5p/hsa-miR-30d-5p	hsa-miR-494-3p
GALNT2	0.119597	0.606783	0.436364	3	hsa-let-7b-5p/hsa-let-7e-5p/hsa-let-7f-5p	hsa-miR-30b-5p/hsa-miR-30c-5p/hsa-miR-30d-5p	hsa-miR-429
GAS2L3	0.119597	0.606783	0.436364	3	hsa-miR-29a-3p/hsa-miR-29b-3p	hsa-miR-424-5p	hsa-miR-92a-3p/hsa-miR-92b-3p
GNAI1	0.119597	0.606783	0.436364	3	hsa-miR-141-3p/hsa-miR-200a-3p	hsa-miR-186-5p/hsa-miR-186-5p	hsa-miR-448
GOLGA8A	0.119597	0.606783	0.436364	3	hsa-miR-128-3p/hsa-miR-128-3p/hsa-miR-216a-3p	hsa-miR-27b-3p	hsa-miR-92a-3p/hsa-miR-92b-3p
GRAMD1C	0.119597	0.606783	0.436364	3	hsa-miR-205-5p	hsa-miR-26a-5p	hsa-miR-27b-3p
GTPBP2	0.119597	0.606783	0.436364	3	hsa-miR-125a-5p/hsa-miR-125b-5p	hsa-miR-204-5p	hsa-miR-29a-3p/hsa-miR-29b-3p
HCN2	0.119597	0.606783	0.436364	3	hsa-miR-135a-5p	hsa-miR-92a-3p/hsa-miR-92b-3p	hsa-miR-9-5p
HK1	0.119597	0.606783	0.436364	3	hsa-miR-138-5p	hsa-miR-302b-3p/hsa-miR-520a-3p	hsa-miR-34a-5p/hsa-miR-34c-5p/hsa-miR-449a/hsa-miR-449b-5p
HOXD13	0.119597	0.606783	0.436364	3	hsa-miR-205-5p	hsa-miR-216b-5p	hsa-miR-26a-5p
IGFBP3	0.119597	0.606783	0.436364	3	hsa-miR-34a-5p/hsa-miR-34c-5p/hsa-miR-449a/hsa-miR-449b-5p	hsa-miR-448	hsa-miR-9-5p
INA	0.119597	0.606783	0.436364	3	hsa-miR-29a-3p/hsa-miR-29b-3p	hsa-miR-34a-5p/hsa-miR-34c-5p/hsa-miR-449a/hsa-miR-449b-5p	hsa-miR-448
INPP5K	0.119597	0.606783	0.436364	3	hsa-miR-296-5p	hsa-miR-34a-5p/hsa-miR-34c-5p/hsa-miR-449a/hsa-miR-449b-5p	hsa-miR-455-5p
ITM2C	0.119597	0.606783	0.436364	3	hsa-miR-138-5p	hsa-miR-381-3p	hsa-miR-9-5p
KCTD1	0.119597	0.606783	0.436364	3	hsa-miR-135a-5p	hsa-miR-29a-3p/hsa-miR-29b-3p	hsa-miR-424-5p
KDM4B	0.119597	0.606783	0.436364	3	hsa-miR-125a-5p/hsa-miR-125b-5p	hsa-miR-27b-3p	hsa-miR-29a-3p/hsa-miR-29b-3p
KIAA1109	0.119597	0.606783	0.436364	3	hsa-miR-128-3p/hsa-miR-128-3p/hsa-miR-216a-3p	hsa-miR-27b-3p	hsa-miR-92a-3p/hsa-miR-92b-3p
KIAA1551	0.119597	0.606783	0.436364	3	hsa-miR-128-3p/hsa-miR-128-3p/hsa-miR-216a-3p	hsa-miR-26a-5p	hsa-miR-27b-3p
KLF16	0.119597	0.606783	0.436364	3	hsa-miR-125a-5p/hsa-miR-125b-5p	hsa-miR-135a-5p	hsa-miR-381-3p
KLHL26	0.119597	0.606783	0.436364	3	hsa-miR-296-5p	hsa-miR-423-5p	hsa-miR-424-5p
LARP1B	0.119597	0.606783	0.436364	3	hsa-miR-302b-3p/hsa-miR-520a-3p	hsa-miR-424-5p	hsa-miR-429
LAYN	0.119597	0.606783	0.436364	3	hsa-miR-146a-5p	hsa-miR-27b-3p	hsa-miR-455-5p
LEPRE1	0.119597	0.606783	0.436364	3	hsa-miR-29a-3p/hsa-miR-29b-3p	hsa-miR-362-5p	hsa-miR-9-5p
LYRM2	0.119597	0.606783	0.436364	3	hsa-miR-302b-3p/hsa-miR-520a-3p	hsa-miR-362-5p	hsa-miR-448
MAP2K3	0.119597	0.606783	0.436364	3	hsa-miR-21-5p	hsa-miR-424-5p	hsa-miR-9-5p
MEX3D	0.119597	0.606783	0.436364	3	hsa-miR-142-5p	hsa-miR-30b-5p/hsa-miR-30c-5p/hsa-miR-30d-5p	hsa-miR-429
MGAT4B	0.119597	0.606783	0.436364	3	hsa-miR-128-3p/hsa-miR-128-3p/hsa-miR-216a-3p	hsa-miR-142-5p	hsa-miR-29a-3p/hsa-miR-29b-3p
MKX	0.119597	0.606783	0.436364	3	hsa-miR-21-5p	hsa-miR-374a-5p	hsa-miR-424-5p
MPP2	0.119597	0.606783	0.436364	3	hsa-miR-128-3p/hsa-miR-128-3p/hsa-miR-216a-3p	hsa-miR-140-5p	hsa-miR-34a-5p/hsa-miR-34c-5p/hsa-miR-449a/hsa-miR-449b-5p
MSANTD3-TMEFF1	0.119597	0.606783	0.436364	3	hsa-miR-128-3p/hsa-miR-128-3p/hsa-miR-216a-3p	hsa-miR-30b-5p/hsa-miR-30c-5p/hsa-miR-30d-5p	hsa-miR-34a-5p/hsa-miR-34c-5p/hsa-miR-449a/hsa-miR-449b-5p
MYLK3	0.119597	0.606783	0.436364	3	hsa-miR-146a-5p	hsa-miR-26a-5p	hsa-miR-448
NAGPA	0.119597	0.606783	0.436364	3	hsa-miR-26a-5p	hsa-miR-30b-5p/hsa-miR-30c-5p/hsa-miR-30d-5p	hsa-miR-423-5p
NAIF1	0.119597	0.606783	0.436364	3	hsa-miR-125a-5p/hsa-miR-125b-5p	hsa-miR-128-3p/hsa-miR-128-3p/hsa-miR-216a-3p	hsa-miR-146a-5p
NCEH1	0.119597	0.606783	0.436364	3	hsa-miR-204-5p	hsa-miR-26a-5p	hsa-miR-34a-5p/hsa-miR-34c-5p/hsa-miR-449a/hsa-miR-449b-5p
NDN	0.119597	0.606783	0.436364	3	hsa-miR-186-5p/hsa-miR-186-5p	hsa-miR-29a-3p/hsa-miR-29b-3p	hsa-miR-429
NIPSNAP3B	0.119597	0.606783	0.436364	3	hsa-miR-186-5p/hsa-miR-186-5p	hsa-miR-216a-5p	hsa-miR-29a-3p/hsa-miR-29b-3p
OLIG3	0.119597	0.606783	0.436364	3	hsa-miR-141-3p/hsa-miR-200a-3p	hsa-miR-216a-5p	hsa-miR-362-5p
PDF	0.119597	0.606783	0.436364	3	hsa-miR-141-3p/hsa-miR-200a-3p	hsa-miR-146a-5p	hsa-miR-204-5p
PDP1	0.119597	0.606783	0.436364	3	hsa-miR-135a-5p	hsa-miR-138-5p	hsa-miR-448
PMF1-BGLAP	0.119597	0.606783	0.436364	3	hsa-miR-128-3p/hsa-miR-128-3p/hsa-miR-216a-3p	hsa-miR-27b-3p	hsa-miR-362-3p
PMPCB	0.119597	0.606783	0.436364	3	hsa-miR-302b-3p/hsa-miR-520a-3p	hsa-miR-374a-5p	hsa-miR-429
PPIL2	0.119597	0.606783	0.436364	3	hsa-miR-155-5p	hsa-miR-448	hsa-miR-9-5p
PRKCD	0.119597	0.606783	0.436364	3	hsa-miR-26a-5p	hsa-miR-27b-3p	hsa-miR-424-5p
RAB2B	0.119597	0.606783	0.436364	3	hsa-miR-425-5p	hsa-miR-448	hsa-miR-494-3p
RCSD1	0.119597	0.606783	0.436364	3	hsa-let-7b-5p/hsa-let-7e-5p/hsa-let-7f-5p	hsa-miR-146a-5p	hsa-miR-26a-5p
REXO1	0.119597	0.606783	0.436364	3	hsa-miR-371a-5p	hsa-miR-7-5p	hsa-miR-92a-3p/hsa-miR-92b-3p
RLF	0.119597	0.606783	0.436364	3	hsa-miR-26a-5p	hsa-miR-29a-3p/hsa-miR-29b-3p	hsa-miR-429
RNF170	0.119597	0.606783	0.436364	3	hsa-let-7b-5p/hsa-let-7e-5p/hsa-let-7f-5p	hsa-miR-186-5p/hsa-miR-186-5p	hsa-miR-204-5p
RNF182	0.119597	0.606783	0.436364	3	hsa-miR-128-3p/hsa-miR-128-3p/hsa-miR-216a-3p	hsa-miR-27b-3p	hsa-miR-28-3p
RNPEPL1	0.119597	0.606783	0.436364	3	hsa-miR-128-3p/hsa-miR-128-3p/hsa-miR-216a-3p	hsa-miR-29a-3p/hsa-miR-29b-3p	hsa-miR-423-5p
RP11-343C2.12	0.119597	0.606783	0.436364	3	hsa-miR-141-3p/hsa-miR-200a-3p	hsa-miR-146a-5p	hsa-miR-204-5p
RPS6KA1	0.119597	0.606783	0.436364	3	hsa-miR-125a-5p/hsa-miR-125b-5p	hsa-miR-138-5p	hsa-miR-302b-3p/hsa-miR-520a-3p
RS1	0.119597	0.606783	0.436364	3	hsa-miR-125a-5p/hsa-miR-125b-5p	hsa-miR-27b-3p	hsa-miR-424-5p
SAMD10	0.119597	0.606783	0.436364	3	hsa-miR-125a-5p/hsa-miR-125b-5p	hsa-miR-128-3p/hsa-miR-128-3p/hsa-miR-216a-3p	hsa-miR-27b-3p
SASS6	0.119597	0.606783	0.436364	3	hsa-miR-204-5p	hsa-miR-26a-5p	hsa-miR-9-5p
SCN9A	0.119597	0.606783	0.436364	3	hsa-miR-141-3p/hsa-miR-200a-3p	hsa-miR-186-5p/hsa-miR-186-5p	hsa-miR-30b-5p/hsa-miR-30c-5p/hsa-miR-30d-5p
SERPINC1	0.119597	0.606783	0.436364	3	hsa-miR-140-5p	hsa-miR-141-3p/hsa-miR-200a-3p	hsa-miR-429
SH3GL2	0.119597	0.606783	0.436364	3	hsa-miR-138-5p	hsa-miR-146a-5p	hsa-miR-424-5p
SHE	0.119597	0.606783	0.436364	3	hsa-miR-128-3p/hsa-miR-128-3p/hsa-miR-216a-3p	hsa-miR-27b-3p	hsa-miR-34a-5p/hsa-miR-34c-5p/hsa-miR-449a/hsa-miR-449b-5p
SLC44A5	0.119597	0.606783	0.436364	3	hsa-miR-135a-5p	hsa-miR-204-5p	hsa-miR-9-5p
SLC6A15	0.119597	0.606783	0.436364	3	hsa-let-7b-5p/hsa-let-7e-5p/hsa-let-7f-5p	hsa-miR-26a-5p	hsa-miR-30b-5p/hsa-miR-30c-5p/hsa-miR-30d-5p
SMIM17	0.119597	0.606783	0.436364	3	hsa-miR-128-3p/hsa-miR-128-3p/hsa-miR-216a-3p	hsa-miR-27b-3p	hsa-miR-29a-3p/hsa-miR-29b-3p
SMOC2	0.119597	0.606783	0.436364	3	hsa-miR-140-5p	hsa-miR-27b-3p	hsa-miR-9-5p
SOWAHA	0.119597	0.606783	0.436364	3	hsa-let-7b-5p/hsa-let-7e-5p/hsa-let-7f-5p	hsa-miR-128-3p/hsa-miR-128-3p/hsa-miR-216a-3p	hsa-miR-27b-3p
SRSF3	0.119597	0.606783	0.436364	3	hsa-miR-135a-5p	hsa-miR-21-5p	hsa-miR-371a-5p
SUCNR1	0.119597	0.606783	0.436364	3	hsa-miR-142-5p	hsa-miR-362-5p	hsa-miR-374a-5p
SYT13	0.119597	0.606783	0.436364	3	hsa-miR-138-5p	hsa-miR-146a-5p	hsa-miR-7-5p
TAF3	0.119597	0.606783	0.436364	3	hsa-miR-128-3p/hsa-miR-128-3p/hsa-miR-216a-3p	hsa-miR-142-5p	hsa-miR-381-3p
TFAP2C	0.119597	0.606783	0.436364	3	hsa-miR-141-3p/hsa-miR-200a-3p	hsa-miR-26a-5p	hsa-miR-29a-3p/hsa-miR-29b-3p
THOC1	0.119597	0.606783	0.436364	3	hsa-miR-128-3p/hsa-miR-128-3p/hsa-miR-216a-3p	hsa-miR-27b-3p	hsa-miR-29a-3p/hsa-miR-29b-3p
THTPA	0.119597	0.606783	0.436364	3	hsa-miR-34a-5p/hsa-miR-34c-5p/hsa-miR-449a/hsa-miR-449b-5p	hsa-miR-384	hsa-miR-423-5p
TIMM10	0.119597	0.606783	0.436364	3	hsa-miR-27b-3p	hsa-miR-362-3p	hsa-miR-425-5p
TMEFF1	0.119597	0.606783	0.436364	3	hsa-miR-128-3p/hsa-miR-128-3p/hsa-miR-216a-3p	hsa-miR-30b-5p/hsa-miR-30c-5p/hsa-miR-30d-5p	hsa-miR-34a-5p/hsa-miR-34c-5p/hsa-miR-449a/hsa-miR-449b-5p
TMEM216	0.119597	0.606783	0.436364	3	hsa-miR-141-3p/hsa-miR-200a-3p	hsa-miR-146a-5p	hsa-miR-34a-5p/hsa-miR-34c-5p/hsa-miR-449a/hsa-miR-449b-5p
TMEM229A	0.119597	0.606783	0.436364	3	hsa-miR-128-3p/hsa-miR-128-3p/hsa-miR-216a-3p	hsa-miR-30b-5p/hsa-miR-30c-5p/hsa-miR-30d-5p	hsa-miR-92a-3p/hsa-miR-92b-3p
TMEM233	0.119597	0.606783	0.436364	3	hsa-let-7b-5p/hsa-let-7e-5p/hsa-let-7f-5p	hsa-miR-27b-3p	hsa-miR-302b-3p/hsa-miR-520a-3p
TNFRSF11A	0.119597	0.606783	0.436364	3	hsa-miR-216a-5p	hsa-miR-216b-5p	hsa-miR-29a-3p/hsa-miR-29b-3p
TP53BP2	0.119597	0.606783	0.436364	3	hsa-miR-138-5p	hsa-miR-142-5p	hsa-miR-205-5p
TRNP1	0.119597	0.606783	0.436364	3	hsa-miR-296-5p	hsa-miR-371a-5p	hsa-miR-423-5p
TSPAN4	0.119597	0.606783	0.436364	3	hsa-miR-141-3p/hsa-miR-200a-3p	hsa-miR-29a-3p/hsa-miR-29b-3p	hsa-miR-501-3p
UAP1	0.119597	0.606783	0.436364	3	hsa-miR-128-3p/hsa-miR-128-3p/hsa-miR-216a-3p	hsa-miR-142-5p	hsa-miR-27b-3p
URGCP	0.119597	0.606783	0.436364	3	hsa-miR-128-3p/hsa-miR-128-3p/hsa-miR-216a-3p	hsa-miR-141-3p/hsa-miR-200a-3p	hsa-miR-27b-3p
URM1	0.119597	0.606783	0.436364	3	hsa-miR-29a-3p/hsa-miR-29b-3p	hsa-miR-30b-5p/hsa-miR-30c-5p/hsa-miR-30d-5p	hsa-miR-423-5p
VWA7	0.119597	0.606783	0.436364	3	hsa-miR-205-5p	hsa-miR-424-5p	hsa-miR-9-5p
WNT3A	0.119597	0.606783	0.436364	3	hsa-miR-128-3p/hsa-miR-128-3p/hsa-miR-216a-3p	hsa-miR-27b-3p	hsa-miR-424-5p
WSB1	0.119597	0.606783	0.436364	3	hsa-miR-128-3p/hsa-miR-128-3p/hsa-miR-216a-3p	hsa-miR-27b-3p	hsa-miR-9-5p
XXYLT1	0.119597	0.606783	0.436364	3	hsa-miR-29a-3p/hsa-miR-29b-3p	hsa-miR-371a-5p	hsa-miR-494-3p
ZBTB3	0.119597	0.606783	0.436364	3	hsa-miR-128-3p/hsa-miR-128-3p/hsa-miR-216a-3p	hsa-miR-27b-3p	hsa-miR-7-5p
ZNF473	0.119597	0.606783	0.436364	3	hsa-let-7b-5p/hsa-let-7e-5p/hsa-let-7f-5p	hsa-miR-125a-5p/hsa-miR-125b-5p	hsa-miR-302b-3p/hsa-miR-520a-3p
CD47	0.120012	0.606783	0.654545	8	hsa-miR-135a-5p	hsa-miR-141-3p/hsa-miR-200a-3p	hsa-miR-155-5p	hsa-miR-21-5p	hsa-miR-34a-5p/hsa-miR-34c-5p/hsa-miR-449a/hsa-miR-449b-5p	hsa-miR-374a-5p	hsa-miR-455-5p	hsa-miR-9-5p
CNOT6	0.120012	0.606783	0.654545	8	hsa-miR-128-3p/hsa-miR-128-3p/hsa-miR-216a-3p	hsa-miR-21-5p	hsa-miR-29a-3p/hsa-miR-29b-3p	hsa-miR-302b-3p/hsa-miR-520a-3p	hsa-miR-30b-5p/hsa-miR-30c-5p/hsa-miR-30d-5p	hsa-miR-34a-5p/hsa-miR-34c-5p/hsa-miR-449a/hsa-miR-449b-5p	hsa-miR-371a-5p	hsa-miR-429
JMJD1C	0.120012	0.606783	0.654545	8	hsa-miR-128-3p/hsa-miR-128-3p/hsa-miR-216a-3p	hsa-miR-138-5p	hsa-miR-141-3p/hsa-miR-200a-3p	hsa-miR-142-5p	hsa-miR-27b-3p	hsa-miR-29a-3p/hsa-miR-29b-3p	hsa-miR-34a-5p/hsa-miR-34c-5p/hsa-miR-449a/hsa-miR-449b-5p	hsa-miR-424-5p
KIAA1244	0.120012	0.606783	0.654545	8	hsa-let-7b-5p/hsa-let-7e-5p/hsa-let-7f-5p	hsa-miR-125a-5p/hsa-miR-125b-5p	hsa-miR-135a-5p	hsa-miR-30b-5p/hsa-miR-30c-5p/hsa-miR-30d-5p	hsa-miR-425-5p	hsa-miR-448	hsa-miR-494-3p	hsa-miR-9-5p
KIAA2018	0.120012	0.606783	0.654545	8	hsa-miR-216a-5p	hsa-miR-26a-5p	hsa-miR-27b-3p	hsa-miR-29a-3p/hsa-miR-29b-3p	hsa-miR-381-3p	hsa-miR-429	hsa-miR-448	hsa-miR-7-5p
PPP3R1	0.120012	0.606783	0.654545	8	hsa-miR-141-3p/hsa-miR-200a-3p	hsa-miR-204-5p	hsa-miR-205-5p	hsa-miR-26a-5p	hsa-miR-27b-3p	hsa-miR-302b-3p/hsa-miR-520a-3p	hsa-miR-30b-5p/hsa-miR-30c-5p/hsa-miR-30d-5p	hsa-miR-34a-5p/hsa-miR-34c-5p/hsa-miR-449a/hsa-miR-449b-5p
SERTAD2	0.120012	0.606783	0.654545	8	hsa-miR-128-3p/hsa-miR-128-3p/hsa-miR-216a-3p	hsa-miR-135a-5p	hsa-miR-155-5p	hsa-miR-205-5p	hsa-miR-27b-3p	hsa-miR-374a-5p	hsa-miR-448	hsa-miR-92a-3p/hsa-miR-92b-3p
SLC30A7	0.120012	0.606783	0.654545	8	hsa-let-7b-5p/hsa-let-7e-5p/hsa-let-7f-5p	hsa-miR-128-3p/hsa-miR-128-3p/hsa-miR-216a-3p	hsa-miR-142-5p	hsa-miR-186-5p/hsa-miR-186-5p	hsa-miR-205-5p	hsa-miR-26a-5p	hsa-miR-27b-3p	hsa-miR-92a-3p/hsa-miR-92b-3p
UHRF1BP1L	0.120012	0.606783	0.654545	8	hsa-miR-125a-5p/hsa-miR-125b-5p	hsa-miR-142-5p	hsa-miR-155-5p	hsa-miR-186-5p/hsa-miR-186-5p	hsa-miR-26a-5p	hsa-miR-29a-3p/hsa-miR-29b-3p	hsa-miR-362-5p	hsa-miR-455-5p
UNKL	0.120012	0.606783	0.654545	8	hsa-miR-128-3p/hsa-miR-128-3p/hsa-miR-216a-3p	hsa-miR-142-5p	hsa-miR-27b-3p	hsa-miR-28-3p	hsa-miR-302b-3p/hsa-miR-520a-3p	hsa-miR-30b-5p/hsa-miR-30c-5p/hsa-miR-30d-5p	hsa-miR-448	hsa-miR-9-5p
WDFY2	0.120012	0.606783	0.654545	8	hsa-let-7b-5p/hsa-let-7e-5p/hsa-let-7f-5p	hsa-miR-128-3p/hsa-miR-128-3p/hsa-miR-216a-3p	hsa-miR-204-5p	hsa-miR-27b-3p	hsa-miR-302b-3p/hsa-miR-520a-3p	hsa-miR-424-5p	hsa-miR-429	hsa-miR-7-5p
AARS	0.120712	0.606783	0.327273	2	hsa-miR-140-5p	hsa-miR-92a-3p/hsa-miR-92b-3p
ABI3BP	0.120712	0.606783	0.327273	2	hsa-miR-30b-5p/hsa-miR-30c-5p/hsa-miR-30d-5p	hsa-miR-381-3p
ACTA2	0.120712	0.606783	0.327273	2	hsa-miR-128-3p/hsa-miR-128-3p/hsa-miR-216a-3p	hsa-miR-27b-3p
ADAP1	0.120712	0.606783	0.327273	2	hsa-miR-27b-3p	hsa-miR-424-5p
ADRB2	0.120712	0.606783	0.327273	2	hsa-let-7b-5p/hsa-let-7e-5p/hsa-let-7f-5p	hsa-miR-424-5p
AK1	0.120712	0.606783	0.327273	2	hsa-miR-29a-3p/hsa-miR-29b-3p	hsa-miR-423-5p
AL355390.1	0.120712	0.606783	0.327273	2	hsa-miR-26a-5p	hsa-miR-27b-3p
APLNR	0.120712	0.606783	0.327273	2	hsa-miR-128-3p/hsa-miR-128-3p/hsa-miR-216a-3p	hsa-miR-29a-3p/hsa-miR-29b-3p
ARHGAP30	0.120712	0.606783	0.327273	2	hsa-miR-204-5p	hsa-miR-302b-3p/hsa-miR-520a-3p
ARHGEF33	0.120712	0.606783	0.327273	2	hsa-miR-204-5p	hsa-miR-381-3p
ARRB2	0.120712	0.606783	0.327273	2	hsa-miR-155-5p	hsa-miR-205-5p
ARVCF	0.120712	0.606783	0.327273	2	hsa-miR-155-5p	hsa-miR-29a-3p/hsa-miR-29b-3p
ASF1B	0.120712	0.606783	0.327273	2	hsa-miR-302b-3p/hsa-miR-520a-3p	hsa-miR-381-3p
ATF3	0.120712	0.606783	0.327273	2	hsa-miR-27b-3p	hsa-miR-494-3p
ATF7IP2	0.120712	0.606783	0.327273	2	hsa-miR-142-5p	hsa-miR-424-5p
ATG5	0.120712	0.606783	0.327273	2	hsa-miR-216b-5p	hsa-miR-30b-5p/hsa-miR-30c-5p/hsa-miR-30d-5p
ATP2B3	0.120712	0.606783	0.327273	2	hsa-let-7b-5p/hsa-let-7e-5p/hsa-let-7f-5p	hsa-miR-135a-5p
ATP5A1	0.120712	0.606783	0.327273	2	hsa-miR-26a-5p	hsa-miR-28-3p
ATXN10	0.120712	0.606783	0.327273	2	hsa-miR-128-3p/hsa-miR-128-3p/hsa-miR-216a-3p	hsa-miR-27b-3p
ATXN7L2	0.120712	0.606783	0.327273	2	hsa-miR-142-5p	hsa-miR-424-5p
B3GNT2	0.120712	0.606783	0.327273	2	hsa-miR-141-3p/hsa-miR-200a-3p	hsa-miR-429
BCL3	0.120712	0.606783	0.327273	2	hsa-miR-128-3p/hsa-miR-128-3p/hsa-miR-216a-3p	hsa-miR-27b-3p
BEND7	0.120712	0.606783	0.327273	2	hsa-miR-27b-3p	hsa-miR-30b-5p/hsa-miR-30c-5p/hsa-miR-30d-5p
BRSK1	0.120712	0.606783	0.327273	2	hsa-miR-128-3p/hsa-miR-128-3p/hsa-miR-216a-3p	hsa-miR-27b-3p
C14orf37	0.120712	0.606783	0.327273	2	hsa-miR-186-5p/hsa-miR-186-5p	hsa-miR-26a-5p
C15orf27	0.120712	0.606783	0.327273	2	hsa-miR-128-3p/hsa-miR-128-3p/hsa-miR-216a-3p	hsa-miR-27b-3p
C17orf70	0.120712	0.606783	0.327273	2	hsa-miR-128-3p/hsa-miR-128-3p/hsa-miR-216a-3p	hsa-miR-9-5p
C20orf24	0.120712	0.606783	0.327273	2	hsa-miR-26a-5p	hsa-miR-7-5p
C6orf57	0.120712	0.606783	0.327273	2	hsa-miR-204-5p	hsa-miR-424-5p
C8orf59	0.120712	0.606783	0.327273	2	hsa-miR-384	hsa-miR-455-5p
CABP1	0.120712	0.606783	0.327273	2	hsa-miR-128-3p/hsa-miR-128-3p/hsa-miR-216a-3p	hsa-miR-27b-3p
CACNA2D3	0.120712	0.606783	0.327273	2	hsa-miR-128-3p/hsa-miR-128-3p/hsa-miR-216a-3p	hsa-miR-27b-3p
CASC10	0.120712	0.606783	0.327273	2	hsa-miR-128-3p/hsa-miR-128-3p/hsa-miR-216a-3p	hsa-miR-27b-3p
CCNE1	0.120712	0.606783	0.327273	2	hsa-miR-138-5p	hsa-miR-424-5p
CD93	0.120712	0.606783	0.327273	2	hsa-miR-216a-5p	hsa-miR-384
CDK2	0.120712	0.606783	0.327273	2	hsa-miR-302b-3p/hsa-miR-520a-3p	hsa-miR-429
CDR2	0.120712	0.606783	0.327273	2	hsa-miR-27b-3p	hsa-miR-429
CERS1	0.120712	0.606783	0.327273	2	hsa-miR-29a-3p/hsa-miR-29b-3p	hsa-miR-424-5p
CHAC1	0.120712	0.606783	0.327273	2	hsa-miR-26a-5p	hsa-miR-424-5p
CHD4	0.120712	0.606783	0.327273	2	hsa-let-7b-5p/hsa-let-7e-5p/hsa-let-7f-5p	hsa-miR-381-3p
CHERP	0.120712	0.606783	0.327273	2	hsa-miR-186-5p/hsa-miR-186-5p	hsa-miR-27b-3p
CHRFAM7A	0.120712	0.606783	0.327273	2	hsa-let-7b-5p/hsa-let-7e-5p/hsa-let-7f-5p	hsa-miR-216a-5p
CHRNA7	0.120712	0.606783	0.327273	2	hsa-let-7b-5p/hsa-let-7e-5p/hsa-let-7f-5p	hsa-miR-216a-5p
CLDN14	0.120712	0.606783	0.327273	2	hsa-miR-374a-5p	hsa-miR-9-5p
CRBN	0.120712	0.606783	0.327273	2	hsa-let-7b-5p/hsa-let-7e-5p/hsa-let-7f-5p	hsa-miR-448
CREB3L1	0.120712	0.606783	0.327273	2	hsa-miR-140-5p	hsa-miR-34a-5p/hsa-miR-34c-5p/hsa-miR-449a/hsa-miR-449b-5p
CRIP2	0.120712	0.606783	0.327273	2	hsa-miR-141-3p/hsa-miR-200a-3p	hsa-miR-371a-5p
CSRP2	0.120712	0.606783	0.327273	2	hsa-miR-128-3p/hsa-miR-128-3p/hsa-miR-216a-3p	hsa-miR-27b-3p
CX3CL1	0.120712	0.606783	0.327273	2	hsa-miR-29a-3p/hsa-miR-29b-3p	hsa-miR-424-5p
CXCL13	0.120712	0.606783	0.327273	2	hsa-miR-186-5p/hsa-miR-186-5p	hsa-miR-494-3p
CYP19A1	0.120712	0.606783	0.327273	2	hsa-let-7b-5p/hsa-let-7e-5p/hsa-let-7f-5p	hsa-miR-216b-5p
DBF4	0.120712	0.606783	0.327273	2	hsa-miR-205-5p	hsa-miR-30b-5p/hsa-miR-30c-5p/hsa-miR-30d-5p
DBR1	0.120712	0.606783	0.327273	2	hsa-miR-374a-5p	hsa-miR-494-3p
DCAF6	0.120712	0.606783	0.327273	2	hsa-miR-302b-3p/hsa-miR-520a-3p	hsa-miR-92a-3p/hsa-miR-92b-3p
DDX18	0.120712	0.606783	0.327273	2	hsa-miR-204-5p	hsa-miR-425-5p
DDX19A	0.120712	0.606783	0.327273	2	hsa-let-7b-5p/hsa-let-7e-5p/hsa-let-7f-5p	hsa-miR-362-3p
DNAH17	0.120712	0.606783	0.327273	2	hsa-miR-141-3p/hsa-miR-200a-3p	hsa-miR-30b-5p/hsa-miR-30c-5p/hsa-miR-30d-5p
DNAJC24	0.120712	0.606783	0.327273	2	hsa-miR-26a-5p	hsa-miR-34a-5p/hsa-miR-34c-5p/hsa-miR-449a/hsa-miR-449b-5p
DPP4	0.120712	0.606783	0.327273	2	hsa-miR-29a-3p/hsa-miR-29b-3p	hsa-miR-448
DROSHA	0.120712	0.606783	0.327273	2	hsa-miR-128-3p/hsa-miR-128-3p/hsa-miR-216a-3p	hsa-miR-27b-3p
EGLN2	0.120712	0.606783	0.327273	2	hsa-let-7b-5p/hsa-let-7e-5p/hsa-let-7f-5p	hsa-miR-424-5p
ERLEC1	0.120712	0.606783	0.327273	2	hsa-miR-140-5p	hsa-miR-146a-5p
EVA1A	0.120712	0.606783	0.327273	2	hsa-miR-125a-5p/hsa-miR-125b-5p	hsa-miR-205-5p
FAIM3	0.120712	0.606783	0.327273	2	hsa-miR-138-5p	hsa-miR-27b-3p
FAM109B	0.120712	0.606783	0.327273	2	hsa-miR-29a-3p/hsa-miR-29b-3p	hsa-miR-30b-5p/hsa-miR-30c-5p/hsa-miR-30d-5p
FAM150B	0.120712	0.606783	0.327273	2	hsa-miR-216b-5p	hsa-miR-92a-3p/hsa-miR-92b-3p
FAM175A	0.120712	0.606783	0.327273	2	hsa-miR-381-3p	hsa-miR-448
FAM184A	0.120712	0.606783	0.327273	2	hsa-miR-128-3p/hsa-miR-128-3p/hsa-miR-216a-3p	hsa-miR-27b-3p
FAM26E	0.120712	0.606783	0.327273	2	hsa-miR-146a-5p	hsa-miR-371a-5p
FAM43B	0.120712	0.606783	0.327273	2	hsa-miR-125a-5p/hsa-miR-125b-5p	hsa-miR-9-5p
FANCF	0.120712	0.606783	0.327273	2	hsa-miR-135a-5p	hsa-miR-30b-5p/hsa-miR-30c-5p/hsa-miR-30d-5p
FBLN5	0.120712	0.606783	0.327273	2	hsa-miR-128-3p/hsa-miR-128-3p/hsa-miR-216a-3p	hsa-miR-27b-3p
FKRP	0.120712	0.606783	0.327273	2	hsa-let-7b-5p/hsa-let-7e-5p/hsa-let-7f-5p	hsa-miR-424-5p
FOXD2	0.120712	0.606783	0.327273	2	hsa-miR-125a-5p/hsa-miR-125b-5p	hsa-miR-374a-5p
GALNT5	0.120712	0.606783	0.327273	2	hsa-miR-128-3p/hsa-miR-128-3p/hsa-miR-216a-3p	hsa-miR-27b-3p
GLUD1	0.120712	0.606783	0.327273	2	hsa-miR-30b-5p/hsa-miR-30c-5p/hsa-miR-30d-5p	hsa-miR-424-5p
GNB5	0.120712	0.606783	0.327273	2	hsa-miR-128-3p/hsa-miR-128-3p/hsa-miR-216a-3p	hsa-miR-302b-3p/hsa-miR-520a-3p
GNG7	0.120712	0.606783	0.327273	2	hsa-miR-135a-5p	hsa-miR-141-3p/hsa-miR-200a-3p
GORASP1	0.120712	0.606783	0.327273	2	hsa-miR-128-3p/hsa-miR-128-3p/hsa-miR-216a-3p	hsa-miR-27b-3p
GORASP2	0.120712	0.606783	0.327273	2	hsa-miR-34a-5p/hsa-miR-34c-5p/hsa-miR-449a/hsa-miR-449b-5p	hsa-miR-424-5p
GPC2	0.120712	0.606783	0.327273	2	hsa-miR-141-3p/hsa-miR-200a-3p	hsa-miR-296-5p
GPR146	0.120712	0.606783	0.327273	2	hsa-miR-26a-5p	hsa-miR-429
GPR157	0.120712	0.606783	0.327273	2	hsa-let-7b-5p/hsa-let-7e-5p/hsa-let-7f-5p	hsa-miR-30b-5p/hsa-miR-30c-5p/hsa-miR-30d-5p
GPR65	0.120712	0.606783	0.327273	2	hsa-miR-186-5p/hsa-miR-186-5p	hsa-miR-384
GSG1	0.120712	0.606783	0.327273	2	hsa-miR-141-3p/hsa-miR-200a-3p	hsa-miR-34a-5p/hsa-miR-34c-5p/hsa-miR-449a/hsa-miR-449b-5p
GSPT2	0.120712	0.606783	0.327273	2	hsa-miR-128-3p/hsa-miR-128-3p/hsa-miR-216a-3p	hsa-miR-27b-3p
GTF2H3	0.120712	0.606783	0.327273	2	hsa-miR-371a-5p	hsa-miR-384
HCAR2	0.120712	0.606783	0.327273	2	hsa-miR-141-3p/hsa-miR-200a-3p	hsa-miR-204-5p
HCAR3	0.120712	0.606783	0.327273	2	hsa-miR-141-3p/hsa-miR-200a-3p	hsa-miR-204-5p
HMGXB3	0.120712	0.606783	0.327273	2	hsa-miR-135a-5p	hsa-miR-9-5p
HOXB13	0.120712	0.606783	0.327273	2	hsa-miR-302b-3p/hsa-miR-520a-3p	hsa-miR-9-5p
HOXC6	0.120712	0.606783	0.327273	2	hsa-miR-128-3p/hsa-miR-128-3p/hsa-miR-216a-3p	hsa-miR-27b-3p
HTR4	0.120712	0.606783	0.327273	2	hsa-let-7b-5p/hsa-let-7e-5p/hsa-let-7f-5p	hsa-miR-424-5p
HTR6	0.120712	0.606783	0.327273	2	hsa-miR-125a-5p/hsa-miR-125b-5p	hsa-miR-29a-3p/hsa-miR-29b-3p
IER2	0.120712	0.606783	0.327273	2	hsa-miR-125a-5p/hsa-miR-125b-5p	hsa-miR-30b-5p/hsa-miR-30c-5p/hsa-miR-30d-5p
IFIT5	0.120712	0.606783	0.327273	2	hsa-miR-374a-5p	hsa-miR-429
IGFBP7	0.120712	0.606783	0.327273	2	hsa-miR-92a-3p/hsa-miR-92b-3p	hsa-miR-9-5p
INPP5J	0.120712	0.606783	0.327273	2	hsa-miR-27b-3p	hsa-miR-424-5p
IRAK2	0.120712	0.606783	0.327273	2	hsa-miR-302b-3p/hsa-miR-520a-3p	hsa-miR-424-5p
IRX4	0.120712	0.606783	0.327273	2	hsa-miR-302b-3p/hsa-miR-520a-3p	hsa-miR-30b-5p/hsa-miR-30c-5p/hsa-miR-30d-5p
ISLR	0.120712	0.606783	0.327273	2	hsa-let-7b-5p/hsa-let-7e-5p/hsa-let-7f-5p	hsa-miR-424-5p
ITGB4	0.120712	0.606783	0.327273	2	hsa-miR-302b-3p/hsa-miR-520a-3p	hsa-miR-9-5p
KBTBD11	0.120712	0.606783	0.327273	2	hsa-miR-128-3p/hsa-miR-128-3p/hsa-miR-216a-3p	hsa-miR-27b-3p
KCTD8	0.120712	0.606783	0.327273	2	hsa-miR-30b-5p/hsa-miR-30c-5p/hsa-miR-30d-5p	hsa-miR-424-5p
KDELC1	0.120712	0.606783	0.327273	2	hsa-miR-29a-3p/hsa-miR-29b-3p	hsa-miR-429
KIAA1430	0.120712	0.606783	0.327273	2	hsa-miR-141-3p/hsa-miR-200a-3p	hsa-miR-429
KIAA1737	0.120712	0.606783	0.327273	2	hsa-miR-26a-5p	hsa-miR-27b-3p
KLHDC8B	0.120712	0.606783	0.327273	2	hsa-let-7b-5p/hsa-let-7e-5p/hsa-let-7f-5p	hsa-miR-424-5p
KLK10	0.120712	0.606783	0.327273	2	hsa-let-7b-5p/hsa-let-7e-5p/hsa-let-7f-5p	hsa-miR-140-5p
LAPTM4B	0.120712	0.606783	0.327273	2	hsa-miR-128-3p/hsa-miR-128-3p/hsa-miR-216a-3p	hsa-miR-27b-3p
LEFTY2	0.120712	0.606783	0.327273	2	hsa-miR-302b-3p/hsa-miR-520a-3p	hsa-miR-494-3p
LRBA	0.120712	0.606783	0.327273	2	hsa-miR-27b-3p	hsa-miR-9-5p
LYST	0.120712	0.606783	0.327273	2	hsa-miR-30b-5p/hsa-miR-30c-5p/hsa-miR-30d-5p	hsa-miR-92a-3p/hsa-miR-92b-3p
MAL	0.120712	0.606783	0.327273	2	hsa-miR-142-5p	hsa-miR-30b-5p/hsa-miR-30c-5p/hsa-miR-30d-5p
MAPKAPK3	0.120712	0.606783	0.327273	2	hsa-miR-128-3p/hsa-miR-128-3p/hsa-miR-216a-3p	hsa-miR-27b-3p
MARCH11	0.120712	0.606783	0.327273	2	hsa-miR-26a-5p	hsa-miR-302b-3p/hsa-miR-520a-3p
MCCD1	0.120712	0.606783	0.327273	2	hsa-miR-204-5p	hsa-miR-302b-3p/hsa-miR-520a-3p
ME1	0.120712	0.606783	0.327273	2	hsa-miR-30b-5p/hsa-miR-30c-5p/hsa-miR-30d-5p	hsa-miR-448
MFSD4	0.120712	0.606783	0.327273	2	hsa-let-7b-5p/hsa-let-7e-5p/hsa-let-7f-5p	hsa-miR-371a-5p
MLIP	0.120712	0.606783	0.327273	2	hsa-miR-140-5p	hsa-miR-29a-3p/hsa-miR-29b-3p
MMAA	0.120712	0.606783	0.327273	2	hsa-miR-186-5p/hsa-miR-186-5p	hsa-miR-204-5p
MPP3	0.120712	0.606783	0.327273	2	hsa-miR-186-5p/hsa-miR-186-5p	hsa-miR-9-5p
MTA2	0.120712	0.606783	0.327273	2	hsa-miR-34a-5p/hsa-miR-34c-5p/hsa-miR-449a/hsa-miR-449b-5p	hsa-miR-371a-5p
MTERFD2	0.120712	0.606783	0.327273	2	hsa-miR-142-5p	hsa-miR-302b-3p/hsa-miR-520a-3p
MTRF1L	0.120712	0.606783	0.327273	2	hsa-miR-205-5p	hsa-miR-448
MYPOP	0.120712	0.606783	0.327273	2	hsa-miR-135a-5p	hsa-miR-26a-5p
NARF	0.120712	0.606783	0.327273	2	hsa-miR-29a-3p/hsa-miR-29b-3p	hsa-miR-9-5p
NCLN	0.120712	0.606783	0.327273	2	hsa-miR-125a-5p/hsa-miR-125b-5p	hsa-miR-135a-5p
NEU1	0.120712	0.606783	0.327273	2	hsa-miR-125a-5p/hsa-miR-125b-5p	hsa-miR-205-5p
NFRKB	0.120712	0.606783	0.327273	2	hsa-miR-422a	hsa-miR-424-5p
NGF	0.120712	0.606783	0.327273	2	hsa-let-7b-5p/hsa-let-7e-5p/hsa-let-7f-5p	hsa-miR-423-5p
NOS1	0.120712	0.606783	0.327273	2	hsa-let-7b-5p/hsa-let-7e-5p/hsa-let-7f-5p	hsa-miR-424-5p
NOV	0.120712	0.606783	0.327273	2	hsa-miR-384	hsa-miR-92a-3p/hsa-miR-92b-3p
NR2E1	0.120712	0.606783	0.327273	2	hsa-miR-302b-3p/hsa-miR-520a-3p	hsa-miR-9-5p
NSMF	0.120712	0.606783	0.327273	2	hsa-miR-138-5p	hsa-miR-92a-3p/hsa-miR-92b-3p
OXTR	0.120712	0.606783	0.327273	2	hsa-miR-29a-3p/hsa-miR-29b-3p	hsa-miR-30b-5p/hsa-miR-30c-5p/hsa-miR-30d-5p
PALM3	0.120712	0.606783	0.327273	2	hsa-let-7b-5p/hsa-let-7e-5p/hsa-let-7f-5p	hsa-miR-26a-5p
PDIA5	0.120712	0.606783	0.327273	2	hsa-miR-128-3p/hsa-miR-128-3p/hsa-miR-216a-3p	hsa-miR-27b-3p
PFKP	0.120712	0.606783	0.327273	2	hsa-miR-142-5p	hsa-miR-302b-3p/hsa-miR-520a-3p
PGM1	0.120712	0.606783	0.327273	2	hsa-miR-30b-5p/hsa-miR-30c-5p/hsa-miR-30d-5p	hsa-miR-34a-5p/hsa-miR-34c-5p/hsa-miR-449a/hsa-miR-449b-5p
PHACTR3	0.120712	0.606783	0.327273	2	hsa-miR-125a-5p/hsa-miR-125b-5p	hsa-miR-429
PID1	0.120712	0.606783	0.327273	2	hsa-miR-186-5p/hsa-miR-186-5p	hsa-miR-424-5p
PIGF	0.120712	0.606783	0.327273	2	hsa-miR-186-5p/hsa-miR-186-5p	hsa-miR-216b-5p
PIK3R2	0.120712	0.606783	0.327273	2	hsa-miR-135a-5p	hsa-miR-30b-5p/hsa-miR-30c-5p/hsa-miR-30d-5p
PITHD1	0.120712	0.606783	0.327273	2	hsa-miR-128-3p/hsa-miR-128-3p/hsa-miR-216a-3p	hsa-miR-27b-3p
PLBD2	0.120712	0.606783	0.327273	2	hsa-miR-26a-5p	hsa-miR-9-5p
PLEK	0.120712	0.606783	0.327273	2	hsa-miR-141-3p/hsa-miR-200a-3p	hsa-miR-186-5p/hsa-miR-186-5p
PLEKHG7	0.120712	0.606783	0.327273	2	hsa-let-7b-5p/hsa-let-7e-5p/hsa-let-7f-5p	hsa-miR-142-5p
PLP1	0.120712	0.606783	0.327273	2	hsa-miR-29a-3p/hsa-miR-29b-3p	hsa-miR-362-5p
PLS1	0.120712	0.606783	0.327273	2	hsa-miR-216b-5p	hsa-miR-30b-5p/hsa-miR-30c-5p/hsa-miR-30d-5p
POLE3	0.120712	0.606783	0.327273	2	hsa-miR-29a-3p/hsa-miR-29b-3p	hsa-miR-30b-5p/hsa-miR-30c-5p/hsa-miR-30d-5p
POLE4	0.120712	0.606783	0.327273	2	hsa-miR-424-5p	hsa-miR-7-5p
POTEE	0.120712	0.606783	0.327273	2	hsa-let-7b-5p/hsa-let-7e-5p/hsa-let-7f-5p	hsa-miR-7-5p
PPARG	0.120712	0.606783	0.327273	2	hsa-miR-128-3p/hsa-miR-128-3p/hsa-miR-216a-3p	hsa-miR-27b-3p
PPCS	0.120712	0.606783	0.327273	2	hsa-miR-92a-3p/hsa-miR-92b-3p	hsa-miR-9-5p
PPP1R14C	0.120712	0.606783	0.327273	2	hsa-miR-30b-5p/hsa-miR-30c-5p/hsa-miR-30d-5p	hsa-miR-381-3p
PROM1	0.120712	0.606783	0.327273	2	hsa-miR-29a-3p/hsa-miR-29b-3p	hsa-miR-30b-5p/hsa-miR-30c-5p/hsa-miR-30d-5p
PSAT1	0.120712	0.606783	0.327273	2	hsa-miR-424-5p	hsa-miR-429
PSTPIP2	0.120712	0.606783	0.327273	2	hsa-miR-125a-5p/hsa-miR-125b-5p	hsa-miR-371a-5p
PTF1A	0.120712	0.606783	0.327273	2	hsa-miR-448	hsa-miR-92a-3p/hsa-miR-92b-3p
PTH	0.120712	0.606783	0.327273	2	hsa-miR-186-5p/hsa-miR-186-5p	hsa-miR-424-5p
RANBP17	0.120712	0.606783	0.327273	2	hsa-miR-151a-3p	hsa-miR-9-5p
RETSAT	0.120712	0.606783	0.327273	2	hsa-miR-138-5p	hsa-miR-21-5p
RGPD8	0.120712	0.606783	0.327273	2	hsa-miR-27b-3p	hsa-miR-424-5p
RHBDD1	0.120712	0.606783	0.327273	2	hsa-miR-138-5p	hsa-miR-29a-3p/hsa-miR-29b-3p
RHEBL1	0.120712	0.606783	0.327273	2	hsa-miR-30b-5p/hsa-miR-30c-5p/hsa-miR-30d-5p	hsa-miR-448
RIPPLY3	0.120712	0.606783	0.327273	2	hsa-miR-26a-5p	hsa-miR-7-5p
RNF122	0.120712	0.606783	0.327273	2	hsa-miR-29a-3p/hsa-miR-29b-3p	hsa-miR-30b-5p/hsa-miR-30c-5p/hsa-miR-30d-5p
RNF5	0.120712	0.606783	0.327273	2	hsa-miR-296-5p	hsa-miR-423-5p
RP11-156E8.1	0.120712	0.606783	0.327273	2	hsa-miR-146a-5p	hsa-miR-205-5p
RP11-47I22.3	0.120712	0.606783	0.327273	2	hsa-miR-216a-5p	hsa-miR-216b-5p
RP11-47I22.4	0.120712	0.606783	0.327273	2	hsa-miR-381-3p	hsa-miR-9-5p
RPA3	0.120712	0.606783	0.327273	2	hsa-miR-146a-5p	hsa-miR-186-5p/hsa-miR-186-5p
RPF2	0.120712	0.606783	0.327273	2	hsa-miR-216a-5p	hsa-miR-384
RPN1	0.120712	0.606783	0.327273	2	hsa-miR-128-3p/hsa-miR-128-3p/hsa-miR-216a-3p	hsa-miR-27b-3p
RRAS	0.120712	0.606783	0.327273	2	hsa-miR-128-3p/hsa-miR-128-3p/hsa-miR-216a-3p	hsa-miR-34a-5p/hsa-miR-34c-5p/hsa-miR-449a/hsa-miR-449b-5p
RRN3	0.120712	0.606783	0.327273	2	hsa-miR-381-3p	hsa-miR-92a-3p/hsa-miR-92b-3p
SBSPON	0.120712	0.606783	0.327273	2	hsa-miR-146a-5p	hsa-miR-429
SERPINF2	0.120712	0.606783	0.327273	2	hsa-miR-30b-5p/hsa-miR-30c-5p/hsa-miR-30d-5p	hsa-miR-34a-5p/hsa-miR-34c-5p/hsa-miR-449a/hsa-miR-449b-5p
SH2D3C	0.120712	0.606783	0.327273	2	hsa-miR-128-3p/hsa-miR-128-3p/hsa-miR-216a-3p	hsa-miR-27b-3p
SHROOM1	0.120712	0.606783	0.327273	2	hsa-miR-30b-5p/hsa-miR-30c-5p/hsa-miR-30d-5p	hsa-miR-455-5p
SIDT1	0.120712	0.606783	0.327273	2	hsa-miR-29a-3p/hsa-miR-29b-3p	hsa-miR-34a-5p/hsa-miR-34c-5p/hsa-miR-449a/hsa-miR-449b-5p
SIX6	0.120712	0.606783	0.327273	2	hsa-miR-374a-5p	hsa-miR-424-5p
SLC38A7	0.120712	0.606783	0.327273	2	hsa-miR-30b-5p/hsa-miR-30c-5p/hsa-miR-30d-5p	hsa-miR-424-5p
SLC5A6	0.120712	0.606783	0.327273	2	hsa-let-7b-5p/hsa-let-7e-5p/hsa-let-7f-5p	hsa-miR-9-5p
SLC5A7	0.120712	0.606783	0.327273	2	hsa-miR-135a-5p	hsa-miR-448
SLCO2A1	0.120712	0.606783	0.327273	2	hsa-miR-125a-5p/hsa-miR-125b-5p	hsa-miR-423-5p
SNAPC1	0.120712	0.606783	0.327273	2	hsa-miR-429	hsa-miR-92a-3p/hsa-miR-92b-3p
SPEG	0.120712	0.606783	0.327273	2	hsa-let-7b-5p/hsa-let-7e-5p/hsa-let-7f-5p	hsa-miR-138-5p
SPI1	0.120712	0.606783	0.327273	2	hsa-miR-146a-5p	hsa-miR-155-5p
SRFBP1	0.120712	0.606783	0.327273	2	hsa-miR-374a-5p	hsa-miR-494-3p
ST6GAL1	0.120712	0.606783	0.327273	2	hsa-miR-125a-5p/hsa-miR-125b-5p	hsa-miR-21-5p
ST6GALNAC4	0.120712	0.606783	0.327273	2	hsa-miR-100-5p	hsa-miR-138-5p
TAF12	0.120712	0.606783	0.327273	2	hsa-miR-141-3p/hsa-miR-200a-3p	hsa-miR-429
TBRG1	0.120712	0.606783	0.327273	2	hsa-miR-155-5p	hsa-miR-424-5p
TFAP2E	0.120712	0.606783	0.327273	2	hsa-miR-26a-5p	hsa-miR-92a-3p/hsa-miR-92b-3p
TGIF2-C20orf24	0.120712	0.606783	0.327273	2	hsa-miR-26a-5p	hsa-miR-7-5p
TIMM17B	0.120712	0.606783	0.327273	2	hsa-let-7b-5p/hsa-let-7e-5p/hsa-let-7f-5p	hsa-miR-125a-5p/hsa-miR-125b-5p
TIMM23	0.120712	0.606783	0.327273	2	hsa-miR-140-5p	hsa-miR-9-5p
TNFAIP8L3	0.120712	0.606783	0.327273	2	hsa-miR-362-3p	hsa-miR-9-5p
TRIM32	0.120712	0.606783	0.327273	2	hsa-miR-142-5p	hsa-miR-155-5p
TRMU	0.120712	0.606783	0.327273	2	hsa-miR-141-3p/hsa-miR-200a-3p	hsa-miR-296-5p
TRPC5	0.120712	0.606783	0.327273	2	hsa-miR-138-5p	hsa-miR-204-5p
TSEN54	0.120712	0.606783	0.327273	2	hsa-miR-125a-5p/hsa-miR-125b-5p	hsa-miR-135a-5p
TTC30A	0.120712	0.606783	0.327273	2	hsa-miR-138-5p	hsa-miR-30b-5p/hsa-miR-30c-5p/hsa-miR-30d-5p
TTC39B	0.120712	0.606783	0.327273	2	hsa-miR-216b-5p	hsa-miR-27b-3p
UBQLN4	0.120712	0.606783	0.327273	2	hsa-miR-422a	hsa-miR-7-5p
UBR4	0.120712	0.606783	0.327273	2	hsa-miR-26a-5p	hsa-miR-424-5p
USF1	0.120712	0.606783	0.327273	2	hsa-miR-296-5p	hsa-miR-34a-5p/hsa-miR-34c-5p/hsa-miR-449a/hsa-miR-449b-5p
USP10	0.120712	0.606783	0.327273	2	hsa-miR-138-5p	hsa-miR-142-5p
VCAM1	0.120712	0.606783	0.327273	2	hsa-miR-374a-5p	hsa-miR-381-3p
VDAC3	0.120712	0.606783	0.327273	2	hsa-miR-7-5p	hsa-miR-9-5p
VPS33A	0.120712	0.606783	0.327273	2	hsa-miR-26a-5p	hsa-miR-30b-5p/hsa-miR-30c-5p/hsa-miR-30d-5p
XKR9	0.120712	0.606783	0.327273	2	hsa-miR-204-5p	hsa-miR-494-3p
ZBTB42	0.120712	0.606783	0.327273	2	hsa-miR-128-3p/hsa-miR-128-3p/hsa-miR-216a-3p	hsa-miR-27b-3p
ZC3H8	0.120712	0.606783	0.327273	2	hsa-miR-204-5p	hsa-miR-374a-5p
ZC3HAV1L	0.120712	0.606783	0.327273	2	hsa-let-7b-5p/hsa-let-7e-5p/hsa-let-7f-5p	hsa-miR-302b-3p/hsa-miR-520a-3p
ZFYVE28	0.120712	0.606783	0.327273	2	hsa-miR-216a-5p	hsa-miR-216b-5p
ZNF354A	0.120712	0.606783	0.327273	2	hsa-let-7b-5p/hsa-let-7e-5p/hsa-let-7f-5p	hsa-miR-9-5p
ZNF593	0.120712	0.606783	0.327273	2	hsa-miR-34a-5p/hsa-miR-34c-5p/hsa-miR-449a/hsa-miR-449b-5p	hsa-miR-7-5p
ZNF699	0.120712	0.606783	0.327273	2	hsa-miR-125a-5p/hsa-miR-125b-5p	hsa-miR-204-5p
ZNF771	0.120712	0.606783	0.327273	2	hsa-miR-374a-5p	hsa-miR-429
ZNF792	0.120712	0.606783	0.327273	2	hsa-miR-125a-5p/hsa-miR-125b-5p	hsa-miR-135a-5p
ZNF793	0.120712	0.606783	0.327273	2	hsa-miR-448	hsa-miR-494-3p
CDYL2	0.121706	0.606783	0.727273	12	hsa-miR-100-5p	hsa-miR-128-3p/hsa-miR-128-3p/hsa-miR-216a-3p	hsa-miR-135a-5p	hsa-miR-204-5p	hsa-miR-216a-5p	hsa-miR-374a-5p	hsa-miR-381-3p	hsa-miR-429	hsa-miR-448	hsa-miR-455-5p	hsa-miR-501-3p	hsa-miR-9-5p
CELF1	0.121706	0.606783	0.727273	12	hsa-let-7b-5p/hsa-let-7e-5p/hsa-let-7f-5p	hsa-miR-140-5p	hsa-miR-141-3p/hsa-miR-200a-3p	hsa-miR-146a-5p	hsa-miR-186-5p/hsa-miR-186-5p	hsa-miR-26a-5p	hsa-miR-27b-3p	hsa-miR-302b-3p/hsa-miR-520a-3p	hsa-miR-30b-5p/hsa-miR-30c-5p/hsa-miR-30d-5p	hsa-miR-371a-5p	hsa-miR-429	hsa-miR-494-3p
DCP2	0.121706	0.606783	0.727273	12	hsa-miR-128-3p/hsa-miR-128-3p/hsa-miR-216a-3p	hsa-miR-135a-5p	hsa-miR-141-3p/hsa-miR-200a-3p	hsa-miR-155-5p	hsa-miR-216b-5p	hsa-miR-27b-3p	hsa-miR-29a-3p/hsa-miR-29b-3p	hsa-miR-30b-5p/hsa-miR-30c-5p/hsa-miR-30d-5p	hsa-miR-371a-5p	hsa-miR-374a-5p	hsa-miR-448	hsa-miR-494-3p
NIPBL	0.121706	0.606783	0.727273	12	hsa-miR-100-5p	hsa-miR-128-3p/hsa-miR-128-3p/hsa-miR-216a-3p	hsa-miR-138-5p	hsa-miR-141-3p/hsa-miR-200a-3p	hsa-miR-204-5p	hsa-miR-21-5p	hsa-miR-216a-5p	hsa-miR-216b-5p	hsa-miR-26a-5p	hsa-miR-374a-5p	hsa-miR-429	hsa-miR-92a-3p/hsa-miR-92b-3p
ATG7	0.122533	0.606783	0.678788	9	hsa-miR-138-5p	hsa-miR-141-3p/hsa-miR-200a-3p	hsa-miR-142-5p	hsa-miR-146a-5p	hsa-miR-186-5p/hsa-miR-186-5p	hsa-miR-204-5p	hsa-miR-302b-3p/hsa-miR-520a-3p	hsa-miR-384	hsa-miR-7-5p
DNAL1	0.122533	0.606783	0.678788	9	hsa-let-7b-5p/hsa-let-7e-5p/hsa-let-7f-5p	hsa-miR-125a-5p/hsa-miR-125b-5p	hsa-miR-135a-5p	hsa-miR-142-5p	hsa-miR-146a-5p	hsa-miR-204-5p	hsa-miR-29a-3p/hsa-miR-29b-3p	hsa-miR-371a-5p	hsa-miR-494-3p
EIF5A2	0.122533	0.606783	0.678788	9	hsa-miR-125a-5p/hsa-miR-125b-5p	hsa-miR-135a-5p	hsa-miR-146a-5p	hsa-miR-27b-3p	hsa-miR-30b-5p/hsa-miR-30c-5p/hsa-miR-30d-5p	hsa-miR-424-5p	hsa-miR-494-3p	hsa-miR-92a-3p/hsa-miR-92b-3p	hsa-miR-9-5p
EN2	0.122533	0.606783	0.678788	9	hsa-miR-128-3p/hsa-miR-128-3p/hsa-miR-216a-3p	hsa-miR-138-5p	hsa-miR-155-5p	hsa-miR-27b-3p	hsa-miR-374a-5p	hsa-miR-424-5p	hsa-miR-494-3p	hsa-miR-92a-3p/hsa-miR-92b-3p	hsa-miR-9-5p
GLIS3	0.122533	0.606783	0.678788	9	hsa-miR-204-5p	hsa-miR-205-5p	hsa-miR-216b-5p	hsa-miR-29a-3p/hsa-miR-29b-3p	hsa-miR-302b-3p/hsa-miR-520a-3p	hsa-miR-374a-5p	hsa-miR-425-5p	hsa-miR-455-5p	hsa-miR-494-3p
MEGF9	0.122533	0.606783	0.678788	9	hsa-miR-125a-5p/hsa-miR-125b-5p	hsa-miR-135a-5p	hsa-miR-141-3p/hsa-miR-200a-3p	hsa-miR-21-5p	hsa-miR-26a-5p	hsa-miR-381-3p	hsa-miR-425-5p	hsa-miR-494-3p	hsa-miR-7-5p
MGA	0.122533	0.606783	0.678788	9	hsa-let-7b-5p/hsa-let-7e-5p/hsa-let-7f-5p	hsa-miR-205-5p	hsa-miR-216a-5p	hsa-miR-28-3p	hsa-miR-29a-3p/hsa-miR-29b-3p	hsa-miR-381-3p	hsa-miR-429	hsa-miR-494-3p	hsa-miR-9-5p
PARP8	0.122533	0.606783	0.678788	9	hsa-let-7b-5p/hsa-let-7e-5p/hsa-let-7f-5p	hsa-miR-138-5p	hsa-miR-216a-5p	hsa-miR-28-3p	hsa-miR-302b-3p/hsa-miR-520a-3p	hsa-miR-30b-5p/hsa-miR-30c-5p/hsa-miR-30d-5p	hsa-miR-34a-5p/hsa-miR-34c-5p/hsa-miR-449a/hsa-miR-449b-5p	hsa-miR-374a-5p	hsa-miR-92a-3p/hsa-miR-92b-3p
PLXNA2	0.122533	0.606783	0.678788	9	hsa-let-7b-5p/hsa-let-7e-5p/hsa-let-7f-5p	hsa-miR-142-5p	hsa-miR-204-5p	hsa-miR-26a-5p	hsa-miR-30b-5p/hsa-miR-30c-5p/hsa-miR-30d-5p	hsa-miR-374a-5p	hsa-miR-424-5p	hsa-miR-429	hsa-miR-9-5p
RAD54L2	0.122533	0.606783	0.678788	9	hsa-miR-125a-5p/hsa-miR-125b-5p	hsa-miR-128-3p/hsa-miR-128-3p/hsa-miR-216a-3p	hsa-miR-140-5p	hsa-miR-141-3p/hsa-miR-200a-3p	hsa-miR-186-5p/hsa-miR-186-5p	hsa-miR-27b-3p	hsa-miR-448	hsa-miR-494-3p	hsa-miR-7-5p
RALGPS1	0.122533	0.606783	0.678788	9	hsa-let-7b-5p/hsa-let-7e-5p/hsa-let-7f-5p	hsa-miR-138-5p	hsa-miR-140-5p	hsa-miR-141-3p/hsa-miR-200a-3p	hsa-miR-27b-3p	hsa-miR-29a-3p/hsa-miR-29b-3p	hsa-miR-30b-5p/hsa-miR-30c-5p/hsa-miR-30d-5p	hsa-miR-34a-5p/hsa-miR-34c-5p/hsa-miR-449a/hsa-miR-449b-5p	hsa-miR-381-3p
SMURF1	0.122533	0.606783	0.678788	9	hsa-miR-125a-5p/hsa-miR-125b-5p	hsa-miR-138-5p	hsa-miR-140-5p	hsa-miR-142-5p	hsa-miR-424-5p	hsa-miR-429	hsa-miR-448	hsa-miR-92a-3p/hsa-miR-92b-3p	hsa-miR-9-5p
ST8SIA4	0.122533	0.606783	0.678788	9	hsa-miR-125a-5p/hsa-miR-125b-5p	hsa-miR-128-3p/hsa-miR-128-3p/hsa-miR-216a-3p	hsa-miR-142-5p	hsa-miR-26a-5p	hsa-miR-27b-3p	hsa-miR-30b-5p/hsa-miR-30c-5p/hsa-miR-30d-5p	hsa-miR-374a-5p	hsa-miR-448	hsa-miR-9-5p
ZFPM2	0.122533	0.606783	0.678788	9	hsa-miR-138-5p	hsa-miR-142-5p	hsa-miR-151a-3p	hsa-miR-302b-3p/hsa-miR-520a-3p	hsa-miR-381-3p	hsa-miR-422a	hsa-miR-429	hsa-miR-455-5p	hsa-miR-92a-3p/hsa-miR-92b-3p
E2F3	0.123008	0.606783	0.71405	11	hsa-miR-125a-5p/hsa-miR-125b-5p	hsa-miR-128-3p/hsa-miR-128-3p/hsa-miR-216a-3p	hsa-miR-138-5p	hsa-miR-141-3p/hsa-miR-200a-3p	hsa-miR-302b-3p/hsa-miR-520a-3p	hsa-miR-30b-5p/hsa-miR-30c-5p/hsa-miR-30d-5p	hsa-miR-34a-5p/hsa-miR-34c-5p/hsa-miR-449a/hsa-miR-449b-5p	hsa-miR-424-5p	hsa-miR-429	hsa-miR-448	hsa-miR-92a-3p/hsa-miR-92b-3p
NLK	0.123008	0.606783	0.71405	11	hsa-let-7b-5p/hsa-let-7e-5p/hsa-let-7f-5p	hsa-miR-140-5p	hsa-miR-216a-5p	hsa-miR-26a-5p	hsa-miR-27b-3p	hsa-miR-30b-5p/hsa-miR-30c-5p/hsa-miR-30d-5p	hsa-miR-362-3p	hsa-miR-381-3p	hsa-miR-384	hsa-miR-455-5p	hsa-miR-92a-3p/hsa-miR-92b-3p
PAK3	0.123008	0.606783	0.71405	11	hsa-miR-125a-5p/hsa-miR-125b-5p	hsa-miR-186-5p/hsa-miR-186-5p	hsa-miR-204-5p	hsa-miR-216b-5p	hsa-miR-302b-3p/hsa-miR-520a-3p	hsa-miR-362-5p	hsa-miR-371a-5p	hsa-miR-423-5p	hsa-miR-425-5p	hsa-miR-429	hsa-miR-9-5p
RNF38	0.123008	0.606783	0.71405	11	hsa-let-7b-5p/hsa-let-7e-5p/hsa-let-7f-5p	hsa-miR-128-3p/hsa-miR-128-3p/hsa-miR-216a-3p	hsa-miR-138-5p	hsa-miR-141-3p/hsa-miR-200a-3p	hsa-miR-27b-3p	hsa-miR-302b-3p/hsa-miR-520a-3p	hsa-miR-374a-5p	hsa-miR-429	hsa-miR-501-3p	hsa-miR-92a-3p/hsa-miR-92b-3p	hsa-miR-9-5p
THRA	0.123008	0.606783	0.71405	11	hsa-let-7b-5p/hsa-let-7e-5p/hsa-let-7f-5p	hsa-miR-125a-5p/hsa-miR-125b-5p	hsa-miR-135a-5p	hsa-miR-138-5p	hsa-miR-140-5p	hsa-miR-296-5p	hsa-miR-29a-3p/hsa-miR-29b-3p	hsa-miR-34a-5p/hsa-miR-34c-5p/hsa-miR-449a/hsa-miR-449b-5p	hsa-miR-371a-5p	hsa-miR-423-5p	hsa-miR-429
UBE2G1	0.123008	0.606783	0.71405	11	hsa-miR-125a-5p/hsa-miR-125b-5p	hsa-miR-141-3p/hsa-miR-200a-3p	hsa-miR-205-5p	hsa-miR-26a-5p	hsa-miR-30b-5p/hsa-miR-30c-5p/hsa-miR-30d-5p	hsa-miR-34a-5p/hsa-miR-34c-5p/hsa-miR-449a/hsa-miR-449b-5p	hsa-miR-371a-5p	hsa-miR-384	hsa-miR-448	hsa-miR-7-5p	hsa-miR-92a-3p/hsa-miR-92b-3p
BAZ2A	0.123384	0.606783	0.698182	10	hsa-miR-100-5p	hsa-miR-125a-5p/hsa-miR-125b-5p	hsa-miR-142-5p	hsa-miR-204-5p	hsa-miR-216a-5p	hsa-miR-216b-5p	hsa-miR-34a-5p/hsa-miR-34c-5p/hsa-miR-449a/hsa-miR-449b-5p	hsa-miR-423-5p	hsa-miR-424-5p	hsa-miR-92a-3p/hsa-miR-92b-3p
CDK8	0.123384	0.606783	0.698182	10	hsa-let-7b-5p/hsa-let-7e-5p/hsa-let-7f-5p	hsa-miR-138-5p	hsa-miR-140-5p	hsa-miR-141-3p/hsa-miR-200a-3p	hsa-miR-216a-5p	hsa-miR-26a-5p	hsa-miR-27b-3p	hsa-miR-424-5p	hsa-miR-425-5p	hsa-miR-9-5p
ELK4	0.123384	0.606783	0.698182	10	hsa-let-7b-5p/hsa-let-7e-5p/hsa-let-7f-5p	hsa-miR-135a-5p	hsa-miR-186-5p/hsa-miR-186-5p	hsa-miR-302b-3p/hsa-miR-520a-3p	hsa-miR-371a-5p	hsa-miR-381-3p	hsa-miR-424-5p	hsa-miR-429	hsa-miR-448	hsa-miR-92a-3p/hsa-miR-92b-3p
FAM168B	0.123384	0.606783	0.698182	10	hsa-miR-141-3p/hsa-miR-200a-3p	hsa-miR-204-5p	hsa-miR-28-3p	hsa-miR-29a-3p/hsa-miR-29b-3p	hsa-miR-302b-3p/hsa-miR-520a-3p	hsa-miR-30b-5p/hsa-miR-30c-5p/hsa-miR-30d-5p	hsa-miR-381-3p	hsa-miR-429	hsa-miR-448	hsa-miR-7-5p
FNDC3B	0.123384	0.606783	0.698182	10	hsa-let-7b-5p/hsa-let-7e-5p/hsa-let-7f-5p	hsa-miR-125a-5p/hsa-miR-125b-5p	hsa-miR-141-3p/hsa-miR-200a-3p	hsa-miR-186-5p/hsa-miR-186-5p	hsa-miR-30b-5p/hsa-miR-30c-5p/hsa-miR-30d-5p	hsa-miR-34a-5p/hsa-miR-34c-5p/hsa-miR-449a/hsa-miR-449b-5p	hsa-miR-424-5p	hsa-miR-429	hsa-miR-92a-3p/hsa-miR-92b-3p	hsa-miR-9-5p
HELZ	0.123384	0.606783	0.698182	10	hsa-let-7b-5p/hsa-let-7e-5p/hsa-let-7f-5p	hsa-miR-155-5p	hsa-miR-186-5p/hsa-miR-186-5p	hsa-miR-204-5p	hsa-miR-216b-5p	hsa-miR-26a-5p	hsa-miR-29a-3p/hsa-miR-29b-3p	hsa-miR-30b-5p/hsa-miR-30c-5p/hsa-miR-30d-5p	hsa-miR-371a-5p	hsa-miR-424-5p
IFFO2	0.123384	0.606783	0.698182	10	hsa-miR-128-3p/hsa-miR-128-3p/hsa-miR-216a-3p	hsa-miR-140-5p	hsa-miR-141-3p/hsa-miR-200a-3p	hsa-miR-142-5p	hsa-miR-21-5p	hsa-miR-29a-3p/hsa-miR-29b-3p	hsa-miR-30b-5p/hsa-miR-30c-5p/hsa-miR-30d-5p	hsa-miR-425-5p	hsa-miR-448	hsa-miR-9-5p
ONECUT3	0.123384	0.606783	0.698182	10	hsa-let-7b-5p/hsa-let-7e-5p/hsa-let-7f-5p	hsa-miR-128-3p/hsa-miR-128-3p/hsa-miR-216a-3p	hsa-miR-142-5p	hsa-miR-26a-5p	hsa-miR-30b-5p/hsa-miR-30c-5p/hsa-miR-30d-5p	hsa-miR-374a-5p	hsa-miR-384	hsa-miR-423-5p	hsa-miR-455-5p	hsa-miR-9-5p
ABHD5	0.12672	0.606783	0.567273	5	hsa-miR-128-3p/hsa-miR-128-3p/hsa-miR-216a-3p	hsa-miR-142-5p	hsa-miR-26a-5p	hsa-miR-27b-3p	hsa-miR-29a-3p/hsa-miR-29b-3p
ADAMTS18	0.12672	0.606783	0.567273	5	hsa-miR-26a-5p	hsa-miR-29a-3p/hsa-miR-29b-3p	hsa-miR-302b-3p/hsa-miR-520a-3p	hsa-miR-424-5p	hsa-miR-9-5p
AJUBA	0.12672	0.606783	0.567273	5	hsa-miR-216a-5p	hsa-miR-302b-3p/hsa-miR-520a-3p	hsa-miR-362-5p	hsa-miR-423-5p	hsa-miR-9-5p
ATP1A2	0.12672	0.606783	0.567273	5	hsa-miR-186-5p/hsa-miR-186-5p	hsa-miR-26a-5p	hsa-miR-27b-3p	hsa-miR-34a-5p/hsa-miR-34c-5p/hsa-miR-449a/hsa-miR-449b-5p	hsa-miR-371a-5p
BAG4	0.12672	0.606783	0.567273	5	hsa-miR-125a-5p/hsa-miR-125b-5p	hsa-miR-135a-5p	hsa-miR-424-5p	hsa-miR-448	hsa-miR-9-5p
BHLHE40	0.12672	0.606783	0.567273	5	hsa-miR-141-3p/hsa-miR-200a-3p	hsa-miR-26a-5p	hsa-miR-374a-5p	hsa-miR-381-3p	hsa-miR-494-3p
C3orf58	0.12672	0.606783	0.567273	5	hsa-miR-142-5p	hsa-miR-30b-5p/hsa-miR-30c-5p/hsa-miR-30d-5p	hsa-miR-34a-5p/hsa-miR-34c-5p/hsa-miR-449a/hsa-miR-449b-5p	hsa-miR-374a-5p	hsa-miR-9-5p
CASKIN1	0.12672	0.606783	0.567273	5	hsa-let-7b-5p/hsa-let-7e-5p/hsa-let-7f-5p	hsa-miR-21-5p	hsa-miR-424-5p	hsa-miR-429	hsa-miR-92a-3p/hsa-miR-92b-3p
CDYL	0.12672	0.606783	0.567273	5	hsa-let-7b-5p/hsa-let-7e-5p/hsa-let-7f-5p	hsa-miR-140-5p	hsa-miR-142-5p	hsa-miR-27b-3p	hsa-miR-429
CNTNAP1	0.12672	0.606783	0.567273	5	hsa-miR-135a-5p	hsa-miR-186-5p/hsa-miR-186-5p	hsa-miR-34a-5p/hsa-miR-34c-5p/hsa-miR-449a/hsa-miR-449b-5p	hsa-miR-424-5p	hsa-miR-448
CPNE2	0.12672	0.606783	0.567273	5	hsa-miR-125a-5p/hsa-miR-125b-5p	hsa-miR-128-3p/hsa-miR-128-3p/hsa-miR-216a-3p	hsa-miR-27b-3p	hsa-miR-381-3p	hsa-miR-501-3p
DNAJC13	0.12672	0.606783	0.567273	5	hsa-miR-128-3p/hsa-miR-128-3p/hsa-miR-216a-3p	hsa-miR-141-3p/hsa-miR-200a-3p	hsa-miR-204-5p	hsa-miR-27b-3p	hsa-miR-30b-5p/hsa-miR-30c-5p/hsa-miR-30d-5p
DUSP6	0.12672	0.606783	0.567273	5	hsa-miR-125a-5p/hsa-miR-125b-5p	hsa-miR-204-5p	hsa-miR-374a-5p	hsa-miR-92a-3p/hsa-miR-92b-3p	hsa-miR-9-5p
ENTPD5	0.12672	0.606783	0.567273	5	hsa-miR-140-5p	hsa-miR-155-5p	hsa-miR-424-5p	hsa-miR-92a-3p/hsa-miR-92b-3p	hsa-miR-9-5p
FAM120A	0.12672	0.606783	0.567273	5	hsa-miR-186-5p/hsa-miR-186-5p	hsa-miR-205-5p	hsa-miR-216b-5p	hsa-miR-27b-3p	hsa-miR-7-5p
FGF12	0.12672	0.606783	0.567273	5	hsa-miR-142-5p	hsa-miR-216b-5p	hsa-miR-374a-5p	hsa-miR-429	hsa-miR-9-5p
HOXA1	0.12672	0.606783	0.567273	5	hsa-let-7b-5p/hsa-let-7e-5p/hsa-let-7f-5p	hsa-miR-100-5p	hsa-miR-216b-5p	hsa-miR-30b-5p/hsa-miR-30c-5p/hsa-miR-30d-5p	hsa-miR-374a-5p
KDSR	0.12672	0.606783	0.567273	5	hsa-miR-381-3p	hsa-miR-422a	hsa-miR-424-5p	hsa-miR-448	hsa-miR-455-5p
KLF8	0.12672	0.606783	0.567273	5	hsa-let-7b-5p/hsa-let-7e-5p/hsa-let-7f-5p	hsa-miR-135a-5p	hsa-miR-27b-3p	hsa-miR-30b-5p/hsa-miR-30c-5p/hsa-miR-30d-5p	hsa-miR-374a-5p
KLF9	0.12672	0.606783	0.567273	5	hsa-let-7b-5p/hsa-let-7e-5p/hsa-let-7f-5p	hsa-miR-140-5p	hsa-miR-21-5p	hsa-miR-30b-5p/hsa-miR-30c-5p/hsa-miR-30d-5p	hsa-miR-429
NLGN1	0.12672	0.606783	0.567273	5	hsa-miR-216a-5p	hsa-miR-26a-5p	hsa-miR-30b-5p/hsa-miR-30c-5p/hsa-miR-30d-5p	hsa-miR-424-5p	hsa-miR-448
NMT1	0.12672	0.606783	0.567273	5	hsa-miR-186-5p/hsa-miR-186-5p	hsa-miR-204-5p	hsa-miR-362-5p	hsa-miR-374a-5p	hsa-miR-9-5p
NUTF2	0.12672	0.606783	0.567273	5	hsa-miR-205-5p	hsa-miR-28-3p	hsa-miR-494-3p	hsa-miR-92a-3p/hsa-miR-92b-3p	hsa-miR-9-5p
NXPH1	0.12672	0.606783	0.567273	5	hsa-miR-141-3p/hsa-miR-200a-3p	hsa-miR-186-5p/hsa-miR-186-5p	hsa-miR-424-5p	hsa-miR-429	hsa-miR-455-5p
OSTM1	0.12672	0.606783	0.567273	5	hsa-miR-140-5p	hsa-miR-26a-5p	hsa-miR-302b-3p/hsa-miR-520a-3p	hsa-miR-30b-5p/hsa-miR-30c-5p/hsa-miR-30d-5p	hsa-miR-429
PDE12	0.12672	0.606783	0.567273	5	hsa-let-7b-5p/hsa-let-7e-5p/hsa-let-7f-5p	hsa-miR-155-5p	hsa-miR-186-5p/hsa-miR-186-5p	hsa-miR-302b-3p/hsa-miR-520a-3p	hsa-miR-371a-5p
PICALM	0.12672	0.606783	0.567273	5	hsa-miR-155-5p	hsa-miR-205-5p	hsa-miR-30b-5p/hsa-miR-30c-5p/hsa-miR-30d-5p	hsa-miR-384	hsa-miR-7-5p
PIGV	0.12672	0.606783	0.567273	5	hsa-miR-186-5p/hsa-miR-186-5p	hsa-miR-204-5p	hsa-miR-205-5p	hsa-miR-30b-5p/hsa-miR-30c-5p/hsa-miR-30d-5p	hsa-miR-448
PLXND1	0.12672	0.606783	0.567273	5	hsa-let-7b-5p/hsa-let-7e-5p/hsa-let-7f-5p	hsa-miR-128-3p/hsa-miR-128-3p/hsa-miR-216a-3p	hsa-miR-142-5p	hsa-miR-27b-3p	hsa-miR-371a-5p
POLR3G	0.12672	0.606783	0.567273	5	hsa-miR-26a-5p	hsa-miR-27b-3p	hsa-miR-302b-3p/hsa-miR-520a-3p	hsa-miR-30b-5p/hsa-miR-30c-5p/hsa-miR-30d-5p	hsa-miR-9-5p
POM121C	0.12672	0.606783	0.567273	5	hsa-miR-128-3p/hsa-miR-128-3p/hsa-miR-216a-3p	hsa-miR-21-5p	hsa-miR-26a-5p	hsa-miR-27b-3p	hsa-miR-424-5p
PTRH2	0.12672	0.606783	0.567273	5	hsa-miR-125a-5p/hsa-miR-125b-5p	hsa-miR-27b-3p	hsa-miR-29a-3p/hsa-miR-29b-3p	hsa-miR-371a-5p	hsa-miR-422a
RAB15	0.12672	0.606783	0.567273	5	hsa-let-7b-5p/hsa-let-7e-5p/hsa-let-7f-5p	hsa-miR-128-3p/hsa-miR-128-3p/hsa-miR-216a-3p	hsa-miR-29a-3p/hsa-miR-29b-3p	hsa-miR-30b-5p/hsa-miR-30c-5p/hsa-miR-30d-5p	hsa-miR-422a
RECK	0.12672	0.606783	0.567273	5	hsa-miR-21-5p	hsa-miR-302b-3p/hsa-miR-520a-3p	hsa-miR-30b-5p/hsa-miR-30c-5p/hsa-miR-30d-5p	hsa-miR-424-5p	hsa-miR-429
RTN4RL1	0.12672	0.606783	0.567273	5	hsa-miR-141-3p/hsa-miR-200a-3p	hsa-miR-296-3p	hsa-miR-34a-5p/hsa-miR-34c-5p/hsa-miR-449a/hsa-miR-449b-5p	hsa-miR-448	hsa-miR-9-5p
SBF2	0.12672	0.606783	0.567273	5	hsa-miR-205-5p	hsa-miR-27b-3p	hsa-miR-29a-3p/hsa-miR-29b-3p	hsa-miR-381-3p	hsa-miR-384
SCD	0.12672	0.606783	0.567273	5	hsa-let-7b-5p/hsa-let-7e-5p/hsa-let-7f-5p	hsa-miR-125a-5p/hsa-miR-125b-5p	hsa-miR-128-3p/hsa-miR-128-3p/hsa-miR-216a-3p	hsa-miR-186-5p/hsa-miR-186-5p	hsa-miR-429
SKIL	0.12672	0.606783	0.567273	5	hsa-let-7b-5p/hsa-let-7e-5p/hsa-let-7f-5p	hsa-miR-216b-5p	hsa-miR-30b-5p/hsa-miR-30c-5p/hsa-miR-30d-5p	hsa-miR-381-3p	hsa-miR-424-5p
SLC6A5	0.12672	0.606783	0.567273	5	hsa-let-7b-5p/hsa-let-7e-5p/hsa-let-7f-5p	hsa-miR-135a-5p	hsa-miR-141-3p/hsa-miR-200a-3p	hsa-miR-142-5p	hsa-miR-374a-5p
SMEK1	0.12672	0.606783	0.567273	5	hsa-miR-125a-5p/hsa-miR-125b-5p	hsa-miR-216b-5p	hsa-miR-371a-5p	hsa-miR-425-5p	hsa-miR-9-5p
SPAST	0.12672	0.606783	0.567273	5	hsa-miR-186-5p/hsa-miR-186-5p	hsa-miR-29a-3p/hsa-miR-29b-3p	hsa-miR-30b-5p/hsa-miR-30c-5p/hsa-miR-30d-5p	hsa-miR-381-3p	hsa-miR-429
SSBP3	0.12672	0.606783	0.567273	5	hsa-miR-186-5p/hsa-miR-186-5p	hsa-miR-204-5p	hsa-miR-30b-5p/hsa-miR-30c-5p/hsa-miR-30d-5p	hsa-miR-448	hsa-miR-92a-3p/hsa-miR-92b-3p
STXBP6	0.12672	0.606783	0.567273	5	hsa-miR-138-5p	hsa-miR-146a-5p	hsa-miR-27b-3p	hsa-miR-429	hsa-miR-494-3p
TCTE1	0.12672	0.606783	0.567273	5	hsa-miR-142-5p	hsa-miR-216a-5p	hsa-miR-216b-5p	hsa-miR-362-3p	hsa-miR-424-5p
TGOLN2	0.12672	0.606783	0.567273	5	hsa-miR-125a-5p/hsa-miR-125b-5p	hsa-miR-128-3p/hsa-miR-128-3p/hsa-miR-216a-3p	hsa-miR-204-5p	hsa-miR-27b-3p	hsa-miR-9-5p
TRPV3	0.12672	0.606783	0.567273	5	hsa-miR-128-3p/hsa-miR-128-3p/hsa-miR-216a-3p	hsa-miR-26a-5p	hsa-miR-27b-3p	hsa-miR-374a-5p	hsa-miR-429
UBE2I	0.12672	0.606783	0.567273	5	hsa-miR-140-5p	hsa-miR-30b-5p/hsa-miR-30c-5p/hsa-miR-30d-5p	hsa-miR-374a-5p	hsa-miR-429	hsa-miR-494-3p
UBE3A	0.12672	0.606783	0.567273	5	hsa-miR-141-3p/hsa-miR-200a-3p	hsa-miR-26a-5p	hsa-miR-302b-3p/hsa-miR-520a-3p	hsa-miR-381-3p	hsa-miR-9-5p
ZBTB14	0.12672	0.606783	0.567273	5	hsa-miR-128-3p/hsa-miR-128-3p/hsa-miR-216a-3p	hsa-miR-362-3p	hsa-miR-371a-5p	hsa-miR-381-3p	hsa-miR-9-5p
ZNF385D	0.12672	0.606783	0.567273	5	hsa-miR-128-3p/hsa-miR-128-3p/hsa-miR-216a-3p	hsa-miR-141-3p/hsa-miR-200a-3p	hsa-miR-155-5p	hsa-miR-27b-3p	hsa-miR-92a-3p/hsa-miR-92b-3p
ZNF597	0.12672	0.606783	0.567273	5	hsa-miR-205-5p	hsa-miR-27b-3p	hsa-miR-302b-3p/hsa-miR-520a-3p	hsa-miR-384	hsa-miR-92a-3p/hsa-miR-92b-3p
AP5M1	0.131917	0.606783	0.770909	15	hsa-miR-128-3p/hsa-miR-128-3p/hsa-miR-216a-3p	hsa-miR-186-5p/hsa-miR-186-5p	hsa-miR-204-5p	hsa-miR-21-5p	hsa-miR-216a-5p	hsa-miR-216b-5p	hsa-miR-26a-5p	hsa-miR-27b-3p	hsa-miR-30b-5p/hsa-miR-30c-5p/hsa-miR-30d-5p	hsa-miR-362-5p	hsa-miR-384	hsa-miR-429	hsa-miR-448	hsa-miR-494-3p	hsa-miR-92a-3p/hsa-miR-92b-3p
IL1RAPL1	0.13588	0.606783	0.763636	14	hsa-miR-125a-5p/hsa-miR-125b-5p	hsa-miR-140-5p	hsa-miR-151a-5p/hsa-miR-151b	hsa-miR-204-5p	hsa-miR-205-5p	hsa-miR-216a-5p	hsa-miR-302b-3p/hsa-miR-520a-3p	hsa-miR-374a-5p	hsa-miR-381-3p	hsa-miR-384	hsa-miR-422a	hsa-miR-424-5p	hsa-miR-425-5p	hsa-miR-9-5p
AIDA	0.13772	0.606783	0.618182	6	hsa-miR-186-5p/hsa-miR-186-5p	hsa-miR-27b-3p	hsa-miR-30b-5p/hsa-miR-30c-5p/hsa-miR-30d-5p	hsa-miR-34a-5p/hsa-miR-34c-5p/hsa-miR-449a/hsa-miR-449b-5p	hsa-miR-448	hsa-miR-92a-3p/hsa-miR-92b-3p
AKAP2	0.13772	0.606783	0.618182	6	hsa-miR-135a-5p	hsa-miR-140-5p	hsa-miR-141-3p/hsa-miR-200a-3p	hsa-miR-204-5p	hsa-miR-29a-3p/hsa-miR-29b-3p	hsa-miR-429
ARFGEF2	0.13772	0.606783	0.618182	6	hsa-miR-135a-5p	hsa-miR-138-5p	hsa-miR-141-3p/hsa-miR-200a-3p	hsa-miR-29a-3p/hsa-miR-29b-3p	hsa-miR-92a-3p/hsa-miR-92b-3p	hsa-miR-9-5p
ARHGEF17	0.13772	0.606783	0.618182	6	hsa-miR-302b-3p/hsa-miR-520a-3p	hsa-miR-429	hsa-miR-455-5p	hsa-miR-494-3p	hsa-miR-92a-3p/hsa-miR-92b-3p	hsa-miR-9-5p
BAMBI	0.13772	0.606783	0.618182	6	hsa-miR-142-5p	hsa-miR-205-5p	hsa-miR-28-3p	hsa-miR-302b-3p/hsa-miR-520a-3p	hsa-miR-362-3p	hsa-miR-381-3p
CRTC1	0.13772	0.606783	0.618182	6	hsa-miR-125a-5p/hsa-miR-125b-5p	hsa-miR-128-3p/hsa-miR-128-3p/hsa-miR-216a-3p	hsa-miR-27b-3p	hsa-miR-34a-5p/hsa-miR-34c-5p/hsa-miR-449a/hsa-miR-449b-5p	hsa-miR-381-3p	hsa-miR-448
EPAS1	0.13772	0.606783	0.618182	6	hsa-miR-142-5p	hsa-miR-155-5p	hsa-miR-26a-5p	hsa-miR-27b-3p	hsa-miR-302b-3p/hsa-miR-520a-3p	hsa-miR-9-5p
ERBB2IP	0.13772	0.606783	0.618182	6	hsa-miR-140-5p	hsa-miR-204-5p	hsa-miR-29a-3p/hsa-miR-29b-3p	hsa-miR-384	hsa-miR-92a-3p/hsa-miR-92b-3p	hsa-miR-9-5p
HECW1	0.13772	0.606783	0.618182	6	hsa-miR-141-3p/hsa-miR-200a-3p	hsa-miR-155-5p	hsa-miR-29a-3p/hsa-miR-29b-3p	hsa-miR-30b-5p/hsa-miR-30c-5p/hsa-miR-30d-5p	hsa-miR-448	hsa-miR-92a-3p/hsa-miR-92b-3p
HSPE1-MOB4	0.13772	0.606783	0.618182	6	hsa-let-7b-5p/hsa-let-7e-5p/hsa-let-7f-5p	hsa-miR-135a-5p	hsa-miR-374a-5p	hsa-miR-424-5p	hsa-miR-429	hsa-miR-92a-3p/hsa-miR-92b-3p
ITGA8	0.13772	0.606783	0.618182	6	hsa-miR-125a-5p/hsa-miR-125b-5p	hsa-miR-128-3p/hsa-miR-128-3p/hsa-miR-216a-3p	hsa-miR-27b-3p	hsa-miR-30b-5p/hsa-miR-30c-5p/hsa-miR-30d-5p	hsa-miR-455-5p	hsa-miR-92a-3p/hsa-miR-92b-3p
LUC7L3	0.13772	0.606783	0.618182	6	hsa-let-7b-5p/hsa-let-7e-5p/hsa-let-7f-5p	hsa-miR-141-3p/hsa-miR-200a-3p	hsa-miR-205-5p	hsa-miR-362-5p	hsa-miR-455-5p	hsa-miR-494-3p
MOB4	0.13772	0.606783	0.618182	6	hsa-let-7b-5p/hsa-let-7e-5p/hsa-let-7f-5p	hsa-miR-135a-5p	hsa-miR-374a-5p	hsa-miR-424-5p	hsa-miR-429	hsa-miR-92a-3p/hsa-miR-92b-3p
NCOA7	0.13772	0.606783	0.618182	6	hsa-miR-128-3p/hsa-miR-128-3p/hsa-miR-216a-3p	hsa-miR-204-5p	hsa-miR-27b-3p	hsa-miR-302b-3p/hsa-miR-520a-3p	hsa-miR-429	hsa-miR-9-5p
NCS1	0.13772	0.606783	0.618182	6	hsa-miR-128-3p/hsa-miR-128-3p/hsa-miR-216a-3p	hsa-miR-140-5p	hsa-miR-27b-3p	hsa-miR-30b-5p/hsa-miR-30c-5p/hsa-miR-30d-5p	hsa-miR-424-5p	hsa-miR-429
NF1	0.13772	0.606783	0.618182	6	hsa-miR-128-3p/hsa-miR-128-3p/hsa-miR-216a-3p	hsa-miR-135a-5p	hsa-miR-27b-3p	hsa-miR-30b-5p/hsa-miR-30c-5p/hsa-miR-30d-5p	hsa-miR-424-5p	hsa-miR-92a-3p/hsa-miR-92b-3p
NREP	0.13772	0.606783	0.618182	6	hsa-miR-128-3p/hsa-miR-128-3p/hsa-miR-216a-3p	hsa-miR-27b-3p	hsa-miR-29a-3p/hsa-miR-29b-3p	hsa-miR-30b-5p/hsa-miR-30c-5p/hsa-miR-30d-5p	hsa-miR-429	hsa-miR-7-5p
PAIP2B	0.13772	0.606783	0.618182	6	hsa-miR-128-3p/hsa-miR-128-3p/hsa-miR-216a-3p	hsa-miR-21-5p	hsa-miR-26a-5p	hsa-miR-27b-3p	hsa-miR-371a-5p	hsa-miR-9-5p
PALM2-AKAP2	0.13772	0.606783	0.618182	6	hsa-miR-135a-5p	hsa-miR-140-5p	hsa-miR-141-3p/hsa-miR-200a-3p	hsa-miR-204-5p	hsa-miR-29a-3p/hsa-miR-29b-3p	hsa-miR-429
PLCG1	0.13772	0.606783	0.618182	6	hsa-miR-125a-5p/hsa-miR-125b-5p	hsa-miR-135a-5p	hsa-miR-30b-5p/hsa-miR-30c-5p/hsa-miR-30d-5p	hsa-miR-34a-5p/hsa-miR-34c-5p/hsa-miR-449a/hsa-miR-449b-5p	hsa-miR-429	hsa-miR-455-5p
PLEKHM1	0.13772	0.606783	0.618182	6	hsa-miR-128-3p/hsa-miR-128-3p/hsa-miR-216a-3p	hsa-miR-135a-5p	hsa-miR-138-5p	hsa-miR-302b-3p/hsa-miR-520a-3p	hsa-miR-448	hsa-miR-92a-3p/hsa-miR-92b-3p
RANBP9	0.13772	0.606783	0.618182	6	hsa-miR-141-3p/hsa-miR-200a-3p	hsa-miR-26a-5p	hsa-miR-30b-5p/hsa-miR-30c-5p/hsa-miR-30d-5p	hsa-miR-374a-5p	hsa-miR-429	hsa-miR-92a-3p/hsa-miR-92b-3p
RGMB	0.13772	0.606783	0.618182	6	hsa-miR-140-5p	hsa-miR-142-5p	hsa-miR-302b-3p/hsa-miR-520a-3p	hsa-miR-34a-5p/hsa-miR-34c-5p/hsa-miR-449a/hsa-miR-449b-5p	hsa-miR-362-3p	hsa-miR-425-5p
RTKN2	0.13772	0.606783	0.618182	6	hsa-miR-155-5p	hsa-miR-204-5p	hsa-miR-29a-3p/hsa-miR-29b-3p	hsa-miR-30b-5p/hsa-miR-30c-5p/hsa-miR-30d-5p	hsa-miR-374a-5p	hsa-miR-494-3p
S100PBP	0.13772	0.606783	0.618182	6	hsa-miR-141-3p/hsa-miR-200a-3p	hsa-miR-155-5p	hsa-miR-186-5p/hsa-miR-186-5p	hsa-miR-30b-5p/hsa-miR-30c-5p/hsa-miR-30d-5p	hsa-miR-429	hsa-miR-9-5p
SGMS1	0.13772	0.606783	0.618182	6	hsa-miR-128-3p/hsa-miR-128-3p/hsa-miR-216a-3p	hsa-miR-135a-5p	hsa-miR-142-5p	hsa-miR-205-5p	hsa-miR-27b-3p	hsa-miR-9-5p
SIX1	0.13772	0.606783	0.618182	6	hsa-miR-128-3p/hsa-miR-128-3p/hsa-miR-216a-3p	hsa-miR-141-3p/hsa-miR-200a-3p	hsa-miR-151a-3p	hsa-miR-27b-3p	hsa-miR-30b-5p/hsa-miR-30c-5p/hsa-miR-30d-5p	hsa-miR-429
UST	0.13772	0.606783	0.618182	6	hsa-miR-128-3p/hsa-miR-128-3p/hsa-miR-216a-3p	hsa-miR-140-5p	hsa-miR-142-5p	hsa-miR-155-5p	hsa-miR-30b-5p/hsa-miR-30c-5p/hsa-miR-30d-5p	hsa-miR-374a-5p
WASF3	0.13772	0.606783	0.618182	6	hsa-miR-142-5p	hsa-miR-146a-5p	hsa-miR-296-3p	hsa-miR-381-3p	hsa-miR-429	hsa-miR-7-5p
SPRY3	0.139469	0.606783	0.755245	13	hsa-miR-128-3p/hsa-miR-128-3p/hsa-miR-216a-3p	hsa-miR-135a-5p	hsa-miR-142-5p	hsa-miR-146a-5p	hsa-miR-204-5p	hsa-miR-216b-5p	hsa-miR-28-3p	hsa-miR-296-5p	hsa-miR-34a-5p/hsa-miR-34c-5p/hsa-miR-449a/hsa-miR-449b-5p	hsa-miR-362-5p	hsa-miR-381-3p	hsa-miR-424-5p	hsa-miR-425-5p
QKI	0.140756	0.606783	0.795722	17	hsa-miR-125a-5p/hsa-miR-125b-5p	hsa-miR-128-3p/hsa-miR-128-3p/hsa-miR-216a-3p	hsa-miR-135a-5p	hsa-miR-141-3p/hsa-miR-200a-3p	hsa-miR-142-5p	hsa-miR-146a-5p	hsa-miR-155-5p	hsa-miR-186-5p/hsa-miR-186-5p	hsa-miR-205-5p	hsa-miR-27b-3p	hsa-miR-29a-3p/hsa-miR-29b-3p	hsa-miR-30b-5p/hsa-miR-30c-5p/hsa-miR-30d-5p	hsa-miR-374a-5p	hsa-miR-424-5p	hsa-miR-429	hsa-miR-92a-3p/hsa-miR-92b-3p	hsa-miR-9-5p
FAM168A	0.142585	0.606783	0.745455	12	hsa-miR-141-3p/hsa-miR-200a-3p	hsa-miR-142-5p	hsa-miR-155-5p	hsa-miR-186-5p/hsa-miR-186-5p	hsa-miR-205-5p	hsa-miR-27b-3p	hsa-miR-302b-3p/hsa-miR-520a-3p	hsa-miR-362-3p	hsa-miR-384	hsa-miR-423-5p	hsa-miR-448	hsa-miR-7-5p
ARHGAP19-SLIT1	0.143746	0.606783	0.654545	7	hsa-miR-128-3p/hsa-miR-128-3p/hsa-miR-216a-3p	hsa-miR-142-5p	hsa-miR-205-5p	hsa-miR-27b-3p	hsa-miR-296-5p	hsa-miR-34a-5p/hsa-miR-34c-5p/hsa-miR-449a/hsa-miR-449b-5p	hsa-miR-7-5p
BRPF3	0.143746	0.606783	0.654545	7	hsa-miR-128-3p/hsa-miR-128-3p/hsa-miR-216a-3p	hsa-miR-138-5p	hsa-miR-142-5p	hsa-miR-204-5p	hsa-miR-27b-3p	hsa-miR-34a-5p/hsa-miR-34c-5p/hsa-miR-449a/hsa-miR-449b-5p	hsa-miR-9-5p
DAB1	0.143746	0.606783	0.654545	7	hsa-let-7b-5p/hsa-let-7e-5p/hsa-let-7f-5p	hsa-miR-141-3p/hsa-miR-200a-3p	hsa-miR-142-5p	hsa-miR-29a-3p/hsa-miR-29b-3p	hsa-miR-30b-5p/hsa-miR-30c-5p/hsa-miR-30d-5p	hsa-miR-371a-5p	hsa-miR-424-5p
DAG1	0.143746	0.606783	0.654545	7	hsa-miR-135a-5p	hsa-miR-140-5p	hsa-miR-21-5p	hsa-miR-30b-5p/hsa-miR-30c-5p/hsa-miR-30d-5p	hsa-miR-381-3p	hsa-miR-429	hsa-miR-92a-3p/hsa-miR-92b-3p
DPYSL3	0.143746	0.606783	0.654545	7	hsa-let-7b-5p/hsa-let-7e-5p/hsa-let-7f-5p	hsa-miR-141-3p/hsa-miR-200a-3p	hsa-miR-204-5p	hsa-miR-216b-5p	hsa-miR-29a-3p/hsa-miR-29b-3p	hsa-miR-362-3p	hsa-miR-494-3p
EIF4G2	0.143746	0.606783	0.654545	7	hsa-let-7b-5p/hsa-let-7e-5p/hsa-let-7f-5p	hsa-miR-140-5p	hsa-miR-146a-5p	hsa-miR-26a-5p	hsa-miR-374a-5p	hsa-miR-381-3p	hsa-miR-92a-3p/hsa-miR-92b-3p
EIF5B	0.143746	0.606783	0.654545	7	hsa-let-7b-5p/hsa-let-7e-5p/hsa-let-7f-5p	hsa-miR-142-5p	hsa-miR-155-5p	hsa-miR-186-5p/hsa-miR-186-5p	hsa-miR-302b-3p/hsa-miR-520a-3p	hsa-miR-429	hsa-miR-92a-3p/hsa-miR-92b-3p
FGF9	0.143746	0.606783	0.654545	7	hsa-miR-140-5p	hsa-miR-155-5p	hsa-miR-302b-3p/hsa-miR-520a-3p	hsa-miR-374a-5p	hsa-miR-424-5p	hsa-miR-425-5p	hsa-miR-9-5p
FRMD4B	0.143746	0.606783	0.654545	7	hsa-let-7b-5p/hsa-let-7e-5p/hsa-let-7f-5p	hsa-miR-186-5p/hsa-miR-186-5p	hsa-miR-26a-5p	hsa-miR-302b-3p/hsa-miR-520a-3p	hsa-miR-381-3p	hsa-miR-429	hsa-miR-7-5p
HMGCS1	0.143746	0.606783	0.654545	7	hsa-miR-141-3p/hsa-miR-200a-3p	hsa-miR-142-5p	hsa-miR-155-5p	hsa-miR-27b-3p	hsa-miR-29a-3p/hsa-miR-29b-3p	hsa-miR-494-3p	hsa-miR-501-3p
JAG1	0.143746	0.606783	0.654545	7	hsa-miR-128-3p/hsa-miR-128-3p/hsa-miR-216a-3p	hsa-miR-140-5p	hsa-miR-141-3p/hsa-miR-200a-3p	hsa-miR-186-5p/hsa-miR-186-5p	hsa-miR-21-5p	hsa-miR-26a-5p	hsa-miR-34a-5p/hsa-miR-34c-5p/hsa-miR-449a/hsa-miR-449b-5p
MSRB3	0.143746	0.606783	0.654545	7	hsa-miR-125a-5p/hsa-miR-125b-5p	hsa-miR-135a-5p	hsa-miR-142-5p	hsa-miR-186-5p/hsa-miR-186-5p	hsa-miR-371a-5p	hsa-miR-381-3p	hsa-miR-92a-3p/hsa-miR-92b-3p
NR4A2	0.143746	0.606783	0.654545	7	hsa-miR-186-5p/hsa-miR-186-5p	hsa-miR-204-5p	hsa-miR-302b-3p/hsa-miR-520a-3p	hsa-miR-30b-5p/hsa-miR-30c-5p/hsa-miR-30d-5p	hsa-miR-34a-5p/hsa-miR-34c-5p/hsa-miR-449a/hsa-miR-449b-5p	hsa-miR-374a-5p	hsa-miR-455-5p
ONECUT1	0.143746	0.606783	0.654545	7	hsa-let-7b-5p/hsa-let-7e-5p/hsa-let-7f-5p	hsa-miR-141-3p/hsa-miR-200a-3p	hsa-miR-142-5p	hsa-miR-205-5p	hsa-miR-29a-3p/hsa-miR-29b-3p	hsa-miR-302b-3p/hsa-miR-520a-3p	hsa-miR-9-5p
PSEN1	0.143746	0.606783	0.654545	7	hsa-miR-128-3p/hsa-miR-128-3p/hsa-miR-216a-3p	hsa-miR-135a-5p	hsa-miR-141-3p/hsa-miR-200a-3p	hsa-miR-27b-3p	hsa-miR-302b-3p/hsa-miR-520a-3p	hsa-miR-7-5p	hsa-miR-9-5p
RNF19B	0.143746	0.606783	0.654545	7	hsa-miR-27b-3p	hsa-miR-296-5p	hsa-miR-362-3p	hsa-miR-423-3p	hsa-miR-423-5p	hsa-miR-7-5p	hsa-miR-9-5p
RSRC2	0.143746	0.606783	0.654545	7	hsa-miR-155-5p	hsa-miR-186-5p/hsa-miR-186-5p	hsa-miR-204-5p	hsa-miR-21-5p	hsa-miR-302b-3p/hsa-miR-520a-3p	hsa-miR-374a-5p	hsa-miR-429
SIM1	0.143746	0.606783	0.654545	7	hsa-miR-125a-5p/hsa-miR-125b-5p	hsa-miR-138-5p	hsa-miR-204-5p	hsa-miR-30b-5p/hsa-miR-30c-5p/hsa-miR-30d-5p	hsa-miR-448	hsa-miR-501-3p	hsa-miR-9-5p
SLC4A8	0.143746	0.606783	0.654545	7	hsa-miR-125a-5p/hsa-miR-125b-5p	hsa-miR-135a-5p	hsa-miR-138-5p	hsa-miR-204-5p	hsa-miR-216b-5p	hsa-miR-424-5p	hsa-miR-92a-3p/hsa-miR-92b-3p
SLC6A1	0.143746	0.606783	0.654545	7	hsa-let-7b-5p/hsa-let-7e-5p/hsa-let-7f-5p	hsa-miR-128-3p/hsa-miR-128-3p/hsa-miR-216a-3p	hsa-miR-27b-3p	hsa-miR-34a-5p/hsa-miR-34c-5p/hsa-miR-449a/hsa-miR-449b-5p	hsa-miR-425-5p	hsa-miR-429	hsa-miR-92a-3p/hsa-miR-92b-3p
SNRK	0.143746	0.606783	0.654545	7	hsa-miR-135a-5p	hsa-miR-141-3p/hsa-miR-200a-3p	hsa-miR-29a-3p/hsa-miR-29b-3p	hsa-miR-302b-3p/hsa-miR-520a-3p	hsa-miR-381-3p	hsa-miR-424-5p	hsa-miR-9-5p
UBE2E3	0.143746	0.606783	0.654545	7	hsa-miR-128-3p/hsa-miR-128-3p/hsa-miR-216a-3p	hsa-miR-142-5p	hsa-miR-205-5p	hsa-miR-29a-3p/hsa-miR-29b-3p	hsa-miR-362-5p	hsa-miR-374a-5p	hsa-miR-384
WDR82	0.143746	0.606783	0.654545	7	hsa-miR-204-5p	hsa-miR-30b-5p/hsa-miR-30c-5p/hsa-miR-30d-5p	hsa-miR-362-3p	hsa-miR-424-5p	hsa-miR-429	hsa-miR-501-3p	hsa-miR-7-5p
DYNLL2	0.145093	0.606783	0.733884	11	hsa-miR-128-3p/hsa-miR-128-3p/hsa-miR-216a-3p	hsa-miR-141-3p/hsa-miR-200a-3p	hsa-miR-146a-5p	hsa-miR-186-5p/hsa-miR-186-5p	hsa-miR-204-5p	hsa-miR-27b-3p	hsa-miR-28-3p	hsa-miR-296-5p	hsa-miR-362-3p	hsa-miR-384	hsa-miR-424-5p
KPNA3	0.145093	0.606783	0.733884	11	hsa-miR-128-3p/hsa-miR-128-3p/hsa-miR-216a-3p	hsa-miR-135a-5p	hsa-miR-138-5p	hsa-miR-141-3p/hsa-miR-200a-3p	hsa-miR-26a-5p	hsa-miR-27b-3p	hsa-miR-30b-5p/hsa-miR-30c-5p/hsa-miR-30d-5p	hsa-miR-381-3p	hsa-miR-424-5p	hsa-miR-448	hsa-miR-455-5p
MEX3A	0.145093	0.606783	0.733884	11	hsa-let-7b-5p/hsa-let-7e-5p/hsa-let-7f-5p	hsa-miR-138-5p	hsa-miR-142-5p	hsa-miR-186-5p/hsa-miR-186-5p	hsa-miR-204-5p	hsa-miR-216a-5p	hsa-miR-28-3p	hsa-miR-302b-3p/hsa-miR-520a-3p	hsa-miR-362-5p	hsa-miR-374a-5p	hsa-miR-9-5p
STRN	0.14615	0.606783	0.790909	16	hsa-let-7b-5p/hsa-let-7e-5p/hsa-let-7f-5p	hsa-miR-140-5p	hsa-miR-141-3p/hsa-miR-200a-3p	hsa-miR-146a-5p	hsa-miR-186-5p/hsa-miR-186-5p	hsa-miR-205-5p	hsa-miR-21-5p	hsa-miR-27b-3p	hsa-miR-29a-3p/hsa-miR-29b-3p	hsa-miR-374a-5p	hsa-miR-424-5p	hsa-miR-429	hsa-miR-448	hsa-miR-501-3p	hsa-miR-7-5p	hsa-miR-92a-3p/hsa-miR-92b-3p
CDH11	0.146648	0.606783	0.681818	8	hsa-miR-128-3p/hsa-miR-128-3p/hsa-miR-216a-3p	hsa-miR-140-5p	hsa-miR-204-5p	hsa-miR-205-5p	hsa-miR-26a-5p	hsa-miR-27b-3p	hsa-miR-429	hsa-miR-9-5p
DDX6	0.146648	0.606783	0.681818	8	hsa-miR-128-3p/hsa-miR-128-3p/hsa-miR-216a-3p	hsa-miR-205-5p	hsa-miR-29a-3p/hsa-miR-29b-3p	hsa-miR-302b-3p/hsa-miR-520a-3p	hsa-miR-362-3p	hsa-miR-381-3p	hsa-miR-423-5p	hsa-miR-448
DESI1	0.146648	0.606783	0.681818	8	hsa-miR-135a-5p	hsa-miR-204-5p	hsa-miR-296-3p	hsa-miR-374a-5p	hsa-miR-424-5p	hsa-miR-429	hsa-miR-92a-3p/hsa-miR-92b-3p	hsa-miR-9-5p
EIF5	0.146648	0.606783	0.681818	8	hsa-miR-128-3p/hsa-miR-128-3p/hsa-miR-216a-3p	hsa-miR-141-3p/hsa-miR-200a-3p	hsa-miR-186-5p/hsa-miR-186-5p	hsa-miR-26a-5p	hsa-miR-27b-3p	hsa-miR-302b-3p/hsa-miR-520a-3p	hsa-miR-494-3p	hsa-miR-9-5p
INHBA	0.146648	0.606783	0.681818	8	hsa-miR-135a-5p	hsa-miR-205-5p	hsa-miR-26a-5p	hsa-miR-302b-3p/hsa-miR-520a-3p	hsa-miR-30b-5p/hsa-miR-30c-5p/hsa-miR-30d-5p	hsa-miR-374a-5p	hsa-miR-429	hsa-miR-9-5p
LHX1	0.146648	0.606783	0.681818	8	hsa-miR-128-3p/hsa-miR-128-3p/hsa-miR-216a-3p	hsa-miR-138-5p	hsa-miR-141-3p/hsa-miR-200a-3p	hsa-miR-142-5p	hsa-miR-26a-5p	hsa-miR-30b-5p/hsa-miR-30c-5p/hsa-miR-30d-5p	hsa-miR-424-5p	hsa-miR-448
LIFR	0.146648	0.606783	0.681818	8	hsa-miR-125a-5p/hsa-miR-125b-5p	hsa-miR-128-3p/hsa-miR-128-3p/hsa-miR-216a-3p	hsa-miR-21-5p	hsa-miR-26a-5p	hsa-miR-27b-3p	hsa-miR-30b-5p/hsa-miR-30c-5p/hsa-miR-30d-5p	hsa-miR-384	hsa-miR-9-5p
PFN2	0.146648	0.606783	0.681818	8	hsa-miR-140-5p	hsa-miR-142-5p	hsa-miR-151a-3p	hsa-miR-302b-3p/hsa-miR-520a-3p	hsa-miR-30b-5p/hsa-miR-30c-5p/hsa-miR-30d-5p	hsa-miR-429	hsa-miR-448	hsa-miR-7-5p
RNF165	0.146648	0.606783	0.681818	8	hsa-let-7b-5p/hsa-let-7e-5p/hsa-let-7f-5p	hsa-miR-142-5p	hsa-miR-296-5p	hsa-miR-29a-3p/hsa-miR-29b-3p	hsa-miR-30b-5p/hsa-miR-30c-5p/hsa-miR-30d-5p	hsa-miR-362-3p	hsa-miR-423-5p	hsa-miR-455-5p
RPRD2	0.146648	0.606783	0.681818	8	hsa-miR-151a-3p	hsa-miR-186-5p/hsa-miR-186-5p	hsa-miR-204-5p	hsa-miR-26a-5p	hsa-miR-296-5p	hsa-miR-30b-5p/hsa-miR-30c-5p/hsa-miR-30d-5p	hsa-miR-371a-5p	hsa-miR-424-5p
SAR1B	0.146648	0.606783	0.681818	8	hsa-miR-216b-5p	hsa-miR-26a-5p	hsa-miR-302b-3p/hsa-miR-520a-3p	hsa-miR-429	hsa-miR-448	hsa-miR-494-3p	hsa-miR-92a-3p/hsa-miR-92b-3p	hsa-miR-9-5p
FAM83F	0.146808	0.606783	0.72	10	hsa-miR-125a-5p/hsa-miR-125b-5p	hsa-miR-135a-5p	hsa-miR-146a-5p	hsa-miR-204-5p	hsa-miR-29a-3p/hsa-miR-29b-3p	hsa-miR-302b-3p/hsa-miR-520a-3p	hsa-miR-30b-5p/hsa-miR-30c-5p/hsa-miR-30d-5p	hsa-miR-362-3p	hsa-miR-384	hsa-miR-422a
KRAS	0.146808	0.606783	0.72	10	hsa-miR-155-5p	hsa-miR-216b-5p	hsa-miR-27b-3p	hsa-miR-30b-5p/hsa-miR-30c-5p/hsa-miR-30d-5p	hsa-miR-381-3p	hsa-miR-384	hsa-miR-424-5p	hsa-miR-429	hsa-miR-448	hsa-miR-501-3p
MAP3K1	0.146808	0.606783	0.72	10	hsa-let-7b-5p/hsa-let-7e-5p/hsa-let-7f-5p	hsa-miR-125a-5p/hsa-miR-125b-5p	hsa-miR-142-5p	hsa-miR-21-5p	hsa-miR-26a-5p	hsa-miR-302b-3p/hsa-miR-520a-3p	hsa-miR-30b-5p/hsa-miR-30c-5p/hsa-miR-30d-5p	hsa-miR-371a-5p	hsa-miR-429	hsa-miR-9-5p
SLC6A6	0.146808	0.606783	0.72	10	hsa-miR-128-3p/hsa-miR-128-3p/hsa-miR-216a-3p	hsa-miR-140-5p	hsa-miR-142-5p	hsa-miR-216b-5p	hsa-miR-26a-5p	hsa-miR-27b-3p	hsa-miR-30b-5p/hsa-miR-30c-5p/hsa-miR-30d-5p	hsa-miR-362-3p	hsa-miR-429	hsa-miR-9-5p
BACE1	0.14746	0.606783	0.70303	9	hsa-miR-128-3p/hsa-miR-128-3p/hsa-miR-216a-3p	hsa-miR-135a-5p	hsa-miR-141-3p/hsa-miR-200a-3p	hsa-miR-27b-3p	hsa-miR-29a-3p/hsa-miR-29b-3p	hsa-miR-374a-5p	hsa-miR-424-5p	hsa-miR-7-5p	hsa-miR-9-5p
ETV3	0.14746	0.606783	0.70303	9	hsa-let-7b-5p/hsa-let-7e-5p/hsa-let-7f-5p	hsa-miR-100-5p	hsa-miR-125a-5p/hsa-miR-125b-5p	hsa-miR-135a-5p	hsa-miR-155-5p	hsa-miR-204-5p	hsa-miR-26a-5p	hsa-miR-374a-5p	hsa-miR-424-5p
KLHL18	0.14746	0.606783	0.70303	9	hsa-miR-128-3p/hsa-miR-128-3p/hsa-miR-216a-3p	hsa-miR-138-5p	hsa-miR-26a-5p	hsa-miR-302b-3p/hsa-miR-520a-3p	hsa-miR-374a-5p	hsa-miR-424-5p	hsa-miR-7-5p	hsa-miR-92a-3p/hsa-miR-92b-3p	hsa-miR-9-5p
MAPK6	0.14746	0.606783	0.70303	9	hsa-let-7b-5p/hsa-let-7e-5p/hsa-let-7f-5p	hsa-miR-128-3p/hsa-miR-128-3p/hsa-miR-216a-3p	hsa-miR-138-5p	hsa-miR-141-3p/hsa-miR-200a-3p	hsa-miR-142-5p	hsa-miR-186-5p/hsa-miR-186-5p	hsa-miR-26a-5p	hsa-miR-374a-5p	hsa-miR-425-5p
NFASC	0.14746	0.606783	0.70303	9	hsa-miR-128-3p/hsa-miR-128-3p/hsa-miR-216a-3p	hsa-miR-141-3p/hsa-miR-200a-3p	hsa-miR-155-5p	hsa-miR-27b-3p	hsa-miR-381-3p	hsa-miR-424-5p	hsa-miR-429	hsa-miR-448	hsa-miR-9-5p
PRKG1	0.14746	0.606783	0.70303	9	hsa-miR-142-5p	hsa-miR-26a-5p	hsa-miR-27b-3p	hsa-miR-29a-3p/hsa-miR-29b-3p	hsa-miR-374a-5p	hsa-miR-381-3p	hsa-miR-424-5p	hsa-miR-429	hsa-miR-448
SCN2A	0.14746	0.606783	0.70303	9	hsa-miR-135a-5p	hsa-miR-142-5p	hsa-miR-186-5p/hsa-miR-186-5p	hsa-miR-302b-3p/hsa-miR-520a-3p	hsa-miR-30b-5p/hsa-miR-30c-5p/hsa-miR-30d-5p	hsa-miR-371a-5p	hsa-miR-424-5p	hsa-miR-429	hsa-miR-501-3p
SNAP25	0.14746	0.606783	0.70303	9	hsa-miR-128-3p/hsa-miR-128-3p/hsa-miR-216a-3p	hsa-miR-138-5p	hsa-miR-141-3p/hsa-miR-200a-3p	hsa-miR-186-5p/hsa-miR-186-5p	hsa-miR-27b-3p	hsa-miR-34a-5p/hsa-miR-34c-5p/hsa-miR-449a/hsa-miR-449b-5p	hsa-miR-424-5p	hsa-miR-425-5p	hsa-miR-429
SYT2	0.14746	0.606783	0.70303	9	hsa-let-7b-5p/hsa-let-7e-5p/hsa-let-7f-5p	hsa-miR-125a-5p/hsa-miR-125b-5p	hsa-miR-128-3p/hsa-miR-128-3p/hsa-miR-216a-3p	hsa-miR-135a-5p	hsa-miR-142-5p	hsa-miR-26a-5p	hsa-miR-27b-3p	hsa-miR-29a-3p/hsa-miR-29b-3p	hsa-miR-92a-3p/hsa-miR-92b-3p
SZRD1	0.14746	0.606783	0.70303	9	hsa-miR-125a-5p/hsa-miR-125b-5p	hsa-miR-128-3p/hsa-miR-128-3p/hsa-miR-216a-3p	hsa-miR-138-5p	hsa-miR-204-5p	hsa-miR-27b-3p	hsa-miR-34a-5p/hsa-miR-34c-5p/hsa-miR-449a/hsa-miR-449b-5p	hsa-miR-451a	hsa-miR-494-3p	hsa-miR-9-5p
TMEM33	0.14746	0.606783	0.70303	9	hsa-miR-146a-5p	hsa-miR-155-5p	hsa-miR-26a-5p	hsa-miR-27b-3p	hsa-miR-29a-3p/hsa-miR-29b-3p	hsa-miR-371a-5p	hsa-miR-429	hsa-miR-455-5p	hsa-miR-9-5p
ACTC1	0.150183	0.606783	0.545455	4	hsa-miR-142-5p	hsa-miR-30b-5p/hsa-miR-30c-5p/hsa-miR-30d-5p	hsa-miR-7-5p	hsa-miR-92a-3p/hsa-miR-92b-3p
AKAP11	0.150183	0.606783	0.545455	4	hsa-miR-138-5p	hsa-miR-141-3p/hsa-miR-200a-3p	hsa-miR-142-5p	hsa-miR-424-5p
ARID3B	0.150183	0.606783	0.545455	4	hsa-let-7b-5p/hsa-let-7e-5p/hsa-let-7f-5p	hsa-miR-125a-5p/hsa-miR-125b-5p	hsa-miR-204-5p	hsa-miR-9-5p
BCOR	0.150183	0.606783	0.545455	4	hsa-miR-142-5p	hsa-miR-27b-3p	hsa-miR-30b-5p/hsa-miR-30c-5p/hsa-miR-30d-5p	hsa-miR-425-5p
C9orf69	0.150183	0.606783	0.545455	4	hsa-miR-155-5p	hsa-miR-29a-3p/hsa-miR-29b-3p	hsa-miR-34a-5p/hsa-miR-34c-5p/hsa-miR-449a/hsa-miR-449b-5p	hsa-miR-424-5p
CCNA2	0.150183	0.606783	0.545455	4	hsa-miR-27b-3p	hsa-miR-29a-3p/hsa-miR-29b-3p	hsa-miR-381-3p	hsa-miR-429
CDS1	0.150183	0.606783	0.545455	4	hsa-miR-128-3p/hsa-miR-128-3p/hsa-miR-216a-3p	hsa-miR-146a-5p	hsa-miR-27b-3p	hsa-miR-494-3p
DAZAP2	0.150183	0.606783	0.545455	4	hsa-miR-125a-5p/hsa-miR-125b-5p	hsa-miR-128-3p/hsa-miR-128-3p/hsa-miR-216a-3p	hsa-miR-186-5p/hsa-miR-186-5p	hsa-miR-302b-3p/hsa-miR-520a-3p
DCDC2	0.150183	0.606783	0.545455	4	hsa-miR-205-5p	hsa-miR-26a-5p	hsa-miR-302b-3p/hsa-miR-520a-3p	hsa-miR-429
DDR2	0.150183	0.606783	0.545455	4	hsa-miR-186-5p/hsa-miR-186-5p	hsa-miR-26a-5p	hsa-miR-28-3p	hsa-miR-381-3p
DNM3	0.150183	0.606783	0.545455	4	hsa-miR-135a-5p	hsa-miR-140-5p	hsa-miR-205-5p	hsa-miR-29a-3p/hsa-miR-29b-3p
ELMOD2	0.150183	0.606783	0.545455	4	hsa-miR-141-3p/hsa-miR-200a-3p	hsa-miR-30b-5p/hsa-miR-30c-5p/hsa-miR-30d-5p	hsa-miR-429	hsa-miR-9-5p
FAM8A1	0.150183	0.606783	0.545455	4	hsa-miR-141-3p/hsa-miR-200a-3p	hsa-miR-26a-5p	hsa-miR-429	hsa-miR-9-5p
FAT4	0.150183	0.606783	0.545455	4	hsa-miR-125a-5p/hsa-miR-125b-5p	hsa-miR-302b-3p/hsa-miR-520a-3p	hsa-miR-34a-5p/hsa-miR-34c-5p/hsa-miR-449a/hsa-miR-449b-5p	hsa-miR-424-5p
FKBP4	0.150183	0.606783	0.545455	4	hsa-miR-140-5p	hsa-miR-296-3p	hsa-miR-29a-3p/hsa-miR-29b-3p	hsa-miR-423-5p
FNBP4	0.150183	0.606783	0.545455	4	hsa-miR-381-3p	hsa-miR-429	hsa-miR-448	hsa-miR-92a-3p/hsa-miR-92b-3p
FRMPD3	0.150183	0.606783	0.545455	4	hsa-miR-128-3p/hsa-miR-128-3p/hsa-miR-216a-3p	hsa-miR-138-5p	hsa-miR-27b-3p	hsa-miR-92a-3p/hsa-miR-92b-3p
GCH1	0.150183	0.606783	0.545455	4	hsa-miR-135a-5p	hsa-miR-30b-5p/hsa-miR-30c-5p/hsa-miR-30d-5p	hsa-miR-34a-5p/hsa-miR-34c-5p/hsa-miR-449a/hsa-miR-449b-5p	hsa-miR-9-5p
GLTP	0.150183	0.606783	0.545455	4	hsa-miR-125a-5p/hsa-miR-125b-5p	hsa-miR-128-3p/hsa-miR-128-3p/hsa-miR-216a-3p	hsa-miR-138-5p	hsa-miR-27b-3p
GLUD2	0.150183	0.606783	0.545455	4	hsa-miR-142-5p	hsa-miR-30b-5p/hsa-miR-30c-5p/hsa-miR-30d-5p	hsa-miR-362-3p	hsa-miR-371a-5p
GPATCH8	0.150183	0.606783	0.545455	4	hsa-miR-424-5p	hsa-miR-429	hsa-miR-92a-3p/hsa-miR-92b-3p	hsa-miR-9-5p
GPR107	0.150183	0.606783	0.545455	4	hsa-miR-125a-5p/hsa-miR-125b-5p	hsa-miR-140-5p	hsa-miR-429	hsa-miR-501-3p
GRAP2	0.150183	0.606783	0.545455	4	hsa-miR-26a-5p	hsa-miR-29a-3p/hsa-miR-29b-3p	hsa-miR-34a-5p/hsa-miR-34c-5p/hsa-miR-449a/hsa-miR-449b-5p	hsa-miR-429
GTF3C2	0.150183	0.606783	0.545455	4	hsa-miR-142-5p	hsa-miR-186-5p/hsa-miR-186-5p	hsa-miR-205-5p	hsa-miR-26a-5p
HACE1	0.150183	0.606783	0.545455	4	hsa-miR-216b-5p	hsa-miR-30b-5p/hsa-miR-30c-5p/hsa-miR-30d-5p	hsa-miR-371a-5p	hsa-miR-381-3p
HAND2	0.150183	0.606783	0.545455	4	hsa-let-7b-5p/hsa-let-7e-5p/hsa-let-7f-5p	hsa-miR-128-3p/hsa-miR-128-3p/hsa-miR-216a-3p	hsa-miR-140-5p	hsa-miR-92a-3p/hsa-miR-92b-3p
HOXB8	0.150183	0.606783	0.545455	4	hsa-miR-128-3p/hsa-miR-128-3p/hsa-miR-216a-3p	hsa-miR-27b-3p	hsa-miR-30b-5p/hsa-miR-30c-5p/hsa-miR-30d-5p	hsa-miR-92a-3p/hsa-miR-92b-3p
HTT	0.150183	0.606783	0.545455	4	hsa-miR-128-3p/hsa-miR-128-3p/hsa-miR-216a-3p	hsa-miR-216a-5p	hsa-miR-216b-5p	hsa-miR-27b-3p
ICMT	0.150183	0.606783	0.545455	4	hsa-let-7b-5p/hsa-let-7e-5p/hsa-let-7f-5p	hsa-miR-100-5p	hsa-miR-186-5p/hsa-miR-186-5p	hsa-miR-9-5p
KCNH7	0.150183	0.606783	0.545455	4	hsa-miR-125a-5p/hsa-miR-125b-5p	hsa-miR-26a-5p	hsa-miR-34a-5p/hsa-miR-34c-5p/hsa-miR-449a/hsa-miR-449b-5p	hsa-miR-448
KCNMB4	0.150183	0.606783	0.545455	4	hsa-miR-128-3p/hsa-miR-128-3p/hsa-miR-216a-3p	hsa-miR-205-5p	hsa-miR-27b-3p	hsa-miR-384
KLHL6	0.150183	0.606783	0.545455	4	hsa-let-7b-5p/hsa-let-7e-5p/hsa-let-7f-5p	hsa-miR-125a-5p/hsa-miR-125b-5p	hsa-miR-216a-5p	hsa-miR-494-3p
KRIT1	0.150183	0.606783	0.545455	4	hsa-miR-142-5p	hsa-miR-21-5p	hsa-miR-362-3p	hsa-miR-371a-5p
LHX8	0.150183	0.606783	0.545455	4	hsa-miR-142-5p	hsa-miR-27b-3p	hsa-miR-302b-3p/hsa-miR-520a-3p	hsa-miR-30b-5p/hsa-miR-30c-5p/hsa-miR-30d-5p
LIN52	0.150183	0.606783	0.545455	4	hsa-miR-138-5p	hsa-miR-302b-3p/hsa-miR-520a-3p	hsa-miR-362-5p	hsa-miR-371a-5p
LONRF1	0.150183	0.606783	0.545455	4	hsa-miR-128-3p/hsa-miR-128-3p/hsa-miR-216a-3p	hsa-miR-135a-5p	hsa-miR-27b-3p	hsa-miR-30b-5p/hsa-miR-30c-5p/hsa-miR-30d-5p
MAP1A	0.150183	0.606783	0.545455	4	hsa-miR-26a-5p	hsa-miR-34a-5p/hsa-miR-34c-5p/hsa-miR-449a/hsa-miR-449b-5p	hsa-miR-424-5p	hsa-miR-9-5p
MAP4	0.150183	0.606783	0.545455	4	hsa-miR-135a-5p	hsa-miR-381-3p	hsa-miR-424-5p	hsa-miR-7-5p
MARK2	0.150183	0.606783	0.545455	4	hsa-miR-125a-5p/hsa-miR-125b-5p	hsa-miR-138-5p	hsa-miR-155-5p	hsa-miR-423-5p
MEGF11	0.150183	0.606783	0.545455	4	hsa-let-7b-5p/hsa-let-7e-5p/hsa-let-7f-5p	hsa-miR-128-3p/hsa-miR-128-3p/hsa-miR-216a-3p	hsa-miR-135a-5p	hsa-miR-138-5p
MVB12B	0.150183	0.606783	0.545455	4	hsa-let-7b-5p/hsa-let-7e-5p/hsa-let-7f-5p	hsa-miR-128-3p/hsa-miR-128-3p/hsa-miR-216a-3p	hsa-miR-141-3p/hsa-miR-200a-3p	hsa-miR-27b-3p
NRCAM	0.150183	0.606783	0.545455	4	hsa-miR-141-3p/hsa-miR-200a-3p	hsa-miR-205-5p	hsa-miR-27b-3p	hsa-miR-302b-3p/hsa-miR-520a-3p
NUDT5	0.150183	0.606783	0.545455	4	hsa-miR-21-5p	hsa-miR-30b-5p/hsa-miR-30c-5p/hsa-miR-30d-5p	hsa-miR-371a-5p	hsa-miR-424-5p
PALLD	0.150183	0.606783	0.545455	4	hsa-miR-155-5p	hsa-miR-302b-3p/hsa-miR-520a-3p	hsa-miR-34a-5p/hsa-miR-34c-5p/hsa-miR-449a/hsa-miR-449b-5p	hsa-miR-92a-3p/hsa-miR-92b-3p
PATZ1	0.150183	0.606783	0.545455	4	hsa-miR-138-5p	hsa-miR-216b-5p	hsa-miR-26a-5p	hsa-miR-27b-3p
PDCD10	0.150183	0.606783	0.545455	4	hsa-miR-186-5p/hsa-miR-186-5p	hsa-miR-26a-5p	hsa-miR-30b-5p/hsa-miR-30c-5p/hsa-miR-30d-5p	hsa-miR-425-5p
PDGFC	0.150183	0.606783	0.545455	4	hsa-miR-186-5p/hsa-miR-186-5p	hsa-miR-29a-3p/hsa-miR-29b-3p	hsa-miR-381-3p	hsa-miR-9-5p
PGP	0.150183	0.606783	0.545455	4	hsa-miR-125a-5p/hsa-miR-125b-5p	hsa-miR-128-3p/hsa-miR-128-3p/hsa-miR-216a-3p	hsa-miR-140-5p	hsa-miR-30b-5p/hsa-miR-30c-5p/hsa-miR-30d-5p
PIK3C2B	0.150183	0.606783	0.545455	4	hsa-miR-125a-5p/hsa-miR-125b-5p	hsa-miR-204-5p	hsa-miR-296-5p	hsa-miR-381-3p
PPP1R3F	0.150183	0.606783	0.545455	4	hsa-miR-138-5p	hsa-miR-374a-5p	hsa-miR-381-3p	hsa-miR-424-5p
RASEF	0.150183	0.606783	0.545455	4	hsa-miR-142-5p	hsa-miR-21-5p	hsa-miR-30b-5p/hsa-miR-30c-5p/hsa-miR-30d-5p	hsa-miR-424-5p
RND3	0.150183	0.606783	0.545455	4	hsa-miR-128-3p/hsa-miR-128-3p/hsa-miR-216a-3p	hsa-miR-27b-3p	hsa-miR-302b-3p/hsa-miR-520a-3p	hsa-miR-429
RPS6KA4	0.150183	0.606783	0.545455	4	hsa-miR-142-5p	hsa-miR-34a-5p/hsa-miR-34c-5p/hsa-miR-449a/hsa-miR-449b-5p	hsa-miR-92a-3p/hsa-miR-92b-3p	hsa-miR-9-5p
SESN1	0.150183	0.606783	0.545455	4	hsa-miR-21-5p	hsa-miR-29a-3p/hsa-miR-29b-3p	hsa-miR-424-5p	hsa-miR-429
SGPL1	0.150183	0.606783	0.545455	4	hsa-miR-125a-5p/hsa-miR-125b-5p	hsa-miR-204-5p	hsa-miR-27b-3p	hsa-miR-384
SLC16A1	0.150183	0.606783	0.545455	4	hsa-miR-128-3p/hsa-miR-128-3p/hsa-miR-216a-3p	hsa-miR-29a-3p/hsa-miR-29b-3p	hsa-miR-374a-5p	hsa-miR-384
SLC27A4	0.150183	0.606783	0.545455	4	hsa-miR-125a-5p/hsa-miR-125b-5p	hsa-miR-27b-3p	hsa-miR-34a-5p/hsa-miR-34c-5p/hsa-miR-449a/hsa-miR-449b-5p	hsa-miR-9-5p
SLC30A3	0.150183	0.606783	0.545455	4	hsa-miR-296-5p	hsa-miR-29a-3p/hsa-miR-29b-3p	hsa-miR-34a-5p/hsa-miR-34c-5p/hsa-miR-449a/hsa-miR-449b-5p	hsa-miR-9-5p
SLC4A7	0.150183	0.606783	0.545455	4	hsa-miR-30b-5p/hsa-miR-30c-5p/hsa-miR-30d-5p	hsa-miR-34a-5p/hsa-miR-34c-5p/hsa-miR-449a/hsa-miR-449b-5p	hsa-miR-424-5p	hsa-miR-429
SPOCK2	0.150183	0.606783	0.545455	4	hsa-miR-141-3p/hsa-miR-200a-3p	hsa-miR-142-5p	hsa-miR-26a-5p	hsa-miR-92a-3p/hsa-miR-92b-3p
SPTBN4	0.150183	0.606783	0.545455	4	hsa-let-7b-5p/hsa-let-7e-5p/hsa-let-7f-5p	hsa-miR-135a-5p	hsa-miR-448	hsa-miR-92a-3p/hsa-miR-92b-3p
SRL	0.150183	0.606783	0.545455	4	hsa-miR-128-3p/hsa-miR-128-3p/hsa-miR-216a-3p	hsa-miR-21-5p	hsa-miR-216b-5p	hsa-miR-27b-3p
STAC	0.150183	0.606783	0.545455	4	hsa-miR-128-3p/hsa-miR-128-3p/hsa-miR-216a-3p	hsa-miR-27b-3p	hsa-miR-30b-5p/hsa-miR-30c-5p/hsa-miR-30d-5p	hsa-miR-9-5p
TBC1D13	0.150183	0.606783	0.545455	4	hsa-miR-128-3p/hsa-miR-128-3p/hsa-miR-216a-3p	hsa-miR-205-5p	hsa-miR-26a-5p	hsa-miR-34a-5p/hsa-miR-34c-5p/hsa-miR-449a/hsa-miR-449b-5p
TCF23	0.150183	0.606783	0.545455	4	hsa-miR-135a-5p	hsa-miR-141-3p/hsa-miR-200a-3p	hsa-miR-422a	hsa-miR-423-5p
TCF7L1	0.150183	0.606783	0.545455	4	hsa-miR-138-5p	hsa-miR-142-5p	hsa-miR-204-5p	hsa-miR-302b-3p/hsa-miR-520a-3p
TEX2	0.150183	0.606783	0.545455	4	hsa-miR-128-3p/hsa-miR-128-3p/hsa-miR-216a-3p	hsa-miR-135a-5p	hsa-miR-30b-5p/hsa-miR-30c-5p/hsa-miR-30d-5p	hsa-miR-92a-3p/hsa-miR-92b-3p
TMED9	0.150183	0.606783	0.545455	4	hsa-miR-125a-5p/hsa-miR-125b-5p	hsa-miR-141-3p/hsa-miR-200a-3p	hsa-miR-29a-3p/hsa-miR-29b-3p	hsa-miR-7-5p
TMEM56	0.150183	0.606783	0.545455	4	hsa-miR-141-3p/hsa-miR-200a-3p	hsa-miR-26a-5p	hsa-miR-30b-5p/hsa-miR-30c-5p/hsa-miR-30d-5p	hsa-miR-448
TOB1	0.150183	0.606783	0.545455	4	hsa-miR-186-5p/hsa-miR-186-5p	hsa-miR-26a-5p	hsa-miR-429	hsa-miR-92a-3p/hsa-miR-92b-3p
TOR1AIP1	0.150183	0.606783	0.545455	4	hsa-miR-27b-3p	hsa-miR-374a-5p	hsa-miR-429	hsa-miR-494-3p
TOX4	0.150183	0.606783	0.545455	4	hsa-miR-128-3p/hsa-miR-128-3p/hsa-miR-216a-3p	hsa-miR-28-3p	hsa-miR-384	hsa-miR-9-5p
WNT4	0.150183	0.606783	0.545455	4	hsa-miR-186-5p/hsa-miR-186-5p	hsa-miR-204-5p	hsa-miR-424-5p	hsa-miR-9-5p
XPOT	0.150183	0.606783	0.545455	4	hsa-let-7b-5p/hsa-let-7e-5p/hsa-let-7f-5p	hsa-miR-142-5p	hsa-miR-186-5p/hsa-miR-186-5p	hsa-miR-374a-5p
ZBTB26	0.150183	0.606783	0.545455	4	hsa-let-7b-5p/hsa-let-7e-5p/hsa-let-7f-5p	hsa-miR-146a-5p	hsa-miR-448	hsa-miR-9-5p
ZNF131	0.150183	0.606783	0.545455	4	hsa-miR-135a-5p	hsa-miR-362-3p	hsa-miR-429	hsa-miR-9-5p
ZNF469	0.150183	0.606783	0.545455	4	hsa-miR-26a-5p	hsa-miR-29a-3p/hsa-miR-29b-3p	hsa-miR-424-5p	hsa-miR-92a-3p/hsa-miR-92b-3p
ZNF518B	0.150183	0.606783	0.545455	4	hsa-miR-155-5p	hsa-miR-205-5p	hsa-miR-29a-3p/hsa-miR-29b-3p	hsa-miR-424-5p
ANKFY1	0.161047	0.606783	0.772028	13	hsa-let-7b-5p/hsa-let-7e-5p/hsa-let-7f-5p	hsa-miR-128-3p/hsa-miR-128-3p/hsa-miR-216a-3p	hsa-miR-138-5p	hsa-miR-140-5p	hsa-miR-141-3p/hsa-miR-200a-3p	hsa-miR-155-5p	hsa-miR-204-5p	hsa-miR-216a-5p	hsa-miR-216b-5p	hsa-miR-27b-3p	hsa-miR-29a-3p/hsa-miR-29b-3p	hsa-miR-362-3p	hsa-miR-7-5p
CDC73	0.161047	0.606783	0.772028	13	hsa-miR-155-5p	hsa-miR-186-5p/hsa-miR-186-5p	hsa-miR-204-5p	hsa-miR-26a-5p	hsa-miR-362-3p	hsa-miR-371a-5p	hsa-miR-374a-5p	hsa-miR-381-3p	hsa-miR-384	hsa-miR-429	hsa-miR-455-5p	hsa-miR-7-5p	hsa-miR-9-5p
ACSL6	0.165083	0.606783	0.610909	5	hsa-let-7b-5p/hsa-let-7e-5p/hsa-let-7f-5p	hsa-miR-125a-5p/hsa-miR-125b-5p	hsa-miR-140-5p	hsa-miR-374a-5p	hsa-miR-448
ADO	0.165083	0.606783	0.610909	5	hsa-miR-135a-5p	hsa-miR-30b-5p/hsa-miR-30c-5p/hsa-miR-30d-5p	hsa-miR-34a-5p/hsa-miR-34c-5p/hsa-miR-449a/hsa-miR-449b-5p	hsa-miR-448	hsa-miR-92a-3p/hsa-miR-92b-3p
AHCYL2	0.165083	0.606783	0.610909	5	hsa-miR-138-5p	hsa-miR-155-5p	hsa-miR-28-3p	hsa-miR-34a-5p/hsa-miR-34c-5p/hsa-miR-449a/hsa-miR-449b-5p	hsa-miR-424-5p
AKAP5	0.165083	0.606783	0.610909	5	hsa-let-7b-5p/hsa-let-7e-5p/hsa-let-7f-5p	hsa-miR-142-5p	hsa-miR-186-5p/hsa-miR-186-5p	hsa-miR-29a-3p/hsa-miR-29b-3p	hsa-miR-302b-3p/hsa-miR-520a-3p
ARL3	0.165083	0.606783	0.610909	5	hsa-miR-216a-5p	hsa-miR-216b-5p	hsa-miR-424-5p	hsa-miR-425-5p	hsa-miR-429
ARNTL	0.165083	0.606783	0.610909	5	hsa-miR-135a-5p	hsa-miR-141-3p/hsa-miR-200a-3p	hsa-miR-27b-3p	hsa-miR-448	hsa-miR-494-3p
CHP1	0.165083	0.606783	0.610909	5	hsa-miR-135a-5p	hsa-miR-141-3p/hsa-miR-200a-3p	hsa-miR-204-5p	hsa-miR-28-3p	hsa-miR-424-5p
CNNM4	0.165083	0.606783	0.610909	5	hsa-miR-142-5p	hsa-miR-296-5p	hsa-miR-381-3p	hsa-miR-92a-3p/hsa-miR-92b-3p	hsa-miR-9-5p
COL4A3BP	0.165083	0.606783	0.610909	5	hsa-let-7b-5p/hsa-let-7e-5p/hsa-let-7f-5p	hsa-miR-30b-5p/hsa-miR-30c-5p/hsa-miR-30d-5p	hsa-miR-424-5p	hsa-miR-429	hsa-miR-7-5p
COL5A1	0.165083	0.606783	0.610909	5	hsa-miR-135a-5p	hsa-miR-26a-5p	hsa-miR-27b-3p	hsa-miR-29a-3p/hsa-miR-29b-3p	hsa-miR-92a-3p/hsa-miR-92b-3p
CTNNBIP1	0.165083	0.606783	0.610909	5	hsa-miR-204-5p	hsa-miR-26a-5p	hsa-miR-29a-3p/hsa-miR-29b-3p	hsa-miR-424-5p	hsa-miR-92a-3p/hsa-miR-92b-3p
DGKE	0.165083	0.606783	0.610909	5	hsa-miR-128-3p/hsa-miR-128-3p/hsa-miR-216a-3p	hsa-miR-138-5p	hsa-miR-27b-3p	hsa-miR-302b-3p/hsa-miR-520a-3p	hsa-miR-30b-5p/hsa-miR-30c-5p/hsa-miR-30d-5p
DGKG	0.165083	0.606783	0.610909	5	hsa-miR-146a-5p	hsa-miR-204-5p	hsa-miR-27b-3p	hsa-miR-371a-5p	hsa-miR-425-5p
[truncated: 4,105 more rows]
